# Supplementary material for: Homo-oligomerization of the human adenosine A2A receptor is driven by the intrinsically disordered C-terminus
Source: eLife. 2021 Jul 16;10:e66662. doi: 10.7554/eLife.66662 (PMC8328514; doi:10.7554/eLife.66662)
Supplement: Figure 1—figure supplement 2—source data 1. [file elife-66662-fig1-figsupp2-data1.xlsx]

## Sheet: WT Replicate 1
Time	UV
6000	1.6e-05
6001	-0.000143
6002	6.2e-05
6003	0.000153
6004	-0.00029
6005	-0.000233
6006	-0.000317
6007	-0.000239
6008	-0.000497
6009	-0.000278
6010	1.4e-05
6011	-5e-05
6012	-0.000197
6013	-0.000281
6014	-0.000573
6015	-0.000588
6016	-0.00082
6017	-0.000722
6018	-0.000717
6019	-0.000435
6020	-0.000249
6021	-0.000308
6022	-0.000424
6023	-0.00011
6024	-0.000119
6025	-0.000401
6026	-0.000641
6027	-0.000576
6028	-0.000342
6029	0.000295
6030	0.000106
6031	-3.5e-05
6032	-0.000372
6033	-0.000449
6034	-0.000426
6035	-0.00047
6036	-0.00034
6037	-2.1e-05
6038	0.000174
6039	0.000195
6040	3e-05
6041	-4.2e-05
6042	0.000148
6043	3.9e-05
6044	-2.5e-05
6045	2e-05
6046	0.000252
6047	0.000557
6048	0.000302
6049	-0.000133
6050	-0.000583
6051	-0.000436
6052	0.000203
6053	-2.9e-05
6054	-0.000506
6055	-0.000562
6056	-0.000207
6057	-0.000328
6058	-0.000699
6059	-0.000418
6060	-0.000442
6061	-0.000499
6062	-0.000132
6063	-0.000186
6064	0.000129
6065	-0.000156
6066	-4.2e-05
6067	0.000318
6068	0.00039
6069	6e-06
6070	-4e-05
6071	-7.7e-05
6072	-0.000277
6073	-0.000635
6074	-0.000488
6075	-6.9e-05
6076	0.000123
6077	-0.000172
6078	-0.000381
6079	-6.5e-05
6080	0.00038
6081	0.000153
6082	8e-05
6083	-0.00028
6084	6.1e-05
6085	-8.9e-05
6086	-0.00011
6087	-0.000301
6088	-0.00034
6089	-0.000355
6090	-0.000248
6091	-0.000293
6092	-0.000409
6093	8e-06
6094	0.000108
6095	0.00027
6096	0.000472
6097	-0.00034
6098	-0.000661
6099	-0.000286
6100	-0.000254
6101	-0.000383
6102	-6.9e-05
6103	0.000246
6104	0.000109
6105	-0.000101
6106	-0.000356
6107	-0.000631
6108	-0.000381
6109	0.000264
6110	0.000572
6111	0.000664
6112	0.000585
6113	0.000284
6114	-0.000133
6115	-9.9e-05
6116	0.000173
6117	0.000412
6118	0.000242
6119	0.00072
6120	0.000732
6121	9.7e-05
6122	-5.7e-05
6123	0.000131
6124	0.000231
6125	1.9e-05
6126	1.4e-05
6127	-0.000483
6128	-0.000618
6129	-0.000497
6130	5.1e-05
6131	0.000179
6132	0.000126
6133	8.5e-05
6134	0.000104
6135	3.6e-05
6136	-0.000318
6137	-0.000306
6138	4.3e-05
6139	9.4e-05
6140	0.000211
6141	0.000291
6142	-1.3e-05
6143	-0.000547
6144	-0.000722
6145	-0.000277
6146	-0.000135
6147	-0.000239
6148	-6.5e-05
6149	-0.000187
6150	-3.4e-05
6151	0.000107
6152	2.6e-05
6153	-0.000292
6154	-0.000239
6155	-0.000313
6156	-0.000472
6157	-0.000765
6158	-0.000755
6159	-0.000398
6160	-0.000253
6161	0.000148
6162	0.000359
6163	0.000453
6164	0.000319
6165	0.000317
6166	0.000204
6167	5.5e-05
6168	-0.000222
6169	-0.000221
6170	-3.9e-05
6171	3e-06
6172	-2.2e-05
6173	0.000365
6174	0.000571
6175	0.000363
6176	0.000278
6177	-0.000162
6178	-0.000475
6179	-4.3e-05
6180	3e-05
6181	-0.000357
6182	-0.000362
6183	0.000287
6184	0.000168
6185	6.7e-05
6186	0.000352
6187	0.000397
6188	-6.6e-05
6189	-0.000152
6190	-0.000319
6191	3.7e-05
6192	-3.9e-05
6193	-4.5e-05
6194	-0.00026
6195	-0.000133
6196	5.9e-05
6197	5.9e-05
6198	0.000448
6199	0.000335
6200	-0.000188
6201	-0.00051
6202	-0.000574
6203	-0.000612
6204	-0.000344
6205	-0.000101
6206	-0.000401
6207	-0.000365
6208	-0.000342
6209	-0.000122
6210	-0.00022
6211	-0.000345
6212	-0.000388
6213	-0.000599
6214	-0.000626
6215	-0.00037
6216	0.000347
6217	0.000325
6218	-6.1e-05
6219	6e-05
6220	-1.8e-05
6221	-0.000291
6222	-0.000447
6223	-0.000596
6224	-0.000478
6225	-0.000337
6226	-0.000161
6227	0.000143
6228	0.000594
6229	0.000145
6230	-9.5e-05
6231	0.000224
6232	-9.5e-05
6233	-0.00058
6234	-0.000603
6235	-0.000577
6236	-0.00046
6237	-0.000376
6238	-0.000547
6239	-0.000411
6240	0
6241	0
6242	0.000115
6243	4.4e-05
6244	-4.1e-05
6245	-0.000113
6246	0.000159
6247	1.7e-05
6248	0.000233
6249	0.000534
6250	0.000929
6251	0.000504
6252	0.000192
6253	0.000172
6254	0.000125
6255	0.000233
6256	0.000162
6257	0.000396
6258	0.000339
6259	0.000455
6260	0.000275
6261	0.000347
6262	5e-06
6263	-0.000175
6264	-0.000169
6265	0.000319
6266	0.00056
6267	0.00035
6268	0.000492
6269	0.000342
6270	8.2e-05
6271	-1.5e-05
6272	0.000138
6273	0.000242
6274	3.7e-05
6275	0.000178
6276	0.000212
6277	7.7e-05
6278	0.000252
6279	0.000385
6280	0.000373
6281	0.00012
6282	0.00035
6283	0.000386
6284	0.000841
6285	0.00101
6286	0.00087
6287	0.000706
6288	0.00083
6289	0.000371
6290	0.000648
6291	0.000751
6292	0.000487
6293	0.000289
6294	-5.3e-05
6295	0.000142
6296	0.000506
6297	0.000563
6298	0.000211
6299	0.000243
6300	0.000425
6301	0.000331
6302	0.000282
6303	0.000252
6304	0.000183
6305	0.000168
6306	0.000108
6307	0.00014
6308	0.000224
6309	0.000419
6310	0.000336
6311	3.9e-05
6312	0.000282
6313	0.000349
6314	0.000266
6315	0.000413
6316	0.00079
6317	0.000524
6318	0.000255
6319	0.000397
6320	0.000439
6321	0.000332
6322	0.000637
6323	0.001185
6324	0.000558
6325	0.000594
6326	0.000547
6327	0.000685
6328	0.000725
6329	0.000728
6330	0.0008
6331	0.000488
6332	0.000119
6333	8.3e-05
6334	0.001004
6335	0.000994
6336	0.000686
6337	0.000913
6338	0.00096
6339	0.000573
6340	0.000346
6341	-1e-06
6342	-0.000248
6343	0.000101
6344	0.00049
6345	0.00064
6346	0.000869
6347	0.000715
6348	0.000455
6349	0.000385
6350	0.000282
6351	0.00016
6352	6.4e-05
6353	0.000138
6354	-0.000232
6355	0.000363
6356	0.000915
6357	0.001
6358	0.000654
6359	0.000554
6360	0.000355
6361	0.000287
6362	8.6e-05
6363	0.000158
6364	0.00017
6365	0.000475
6366	0.000425
6367	6.8e-05
6368	0.000207
6369	0.00043
6370	0.000123
6371	-0.000173
6372	3.3e-05
6373	4.3e-05
6374	-0.000132
6375	9.8e-05
6376	0.000194
6377	0.000512
6378	0.000545
6379	0.000225
6380	-0.000164
6381	-0.00035
6382	-0.000213
6383	0.00012
6384	9.7e-05
6385	0.000307
6386	0.00046
6387	0.000462
6388	0.000417
6389	0.000702
6390	0.000737
6391	0.000514
6392	0.000403
6393	0.00058
6394	0.000312
6395	0.000152
6396	0.000169
6397	0.000354
6398	0.000174
6399	-2e-06
6400	0.000112
6401	0.000106
6402	5.3e-05
6403	0.000126
6404	0.000338
6405	0.000126
6406	1e-05
6407	0.000171
6408	0.000253
6409	0.000724
6410	0.000827
6411	0.0004
6412	3.6e-05
6413	0.000315
6414	-4.7e-05
6415	-0.000323
6416	-0.000237
6417	0.000373
6418	0.000663
6419	0.000311
6420	0.000183
6421	0.000328
6422	0.000342
6423	0.000755
6424	0.000808
6425	0.000415
6426	0.000398
6427	0.000419
6428	0.000682
6429	0.000712
6430	0.000393
6431	0.000286
6432	0.000407
6433	0.000621
6434	0.000636
6435	0.000529
6436	6.4e-05
6437	-0.00055
6438	-0.000433
6439	5.3e-05
6440	0.000398
6441	0.000361
6442	0.00016
6443	0.000184
6444	0.000124
6445	0.000309
6446	0.000505
6447	0.000496
6448	0.000475
6449	0.000665
6450	0.000507
6451	0.000514
6452	0.000463
6453	0.000683
6454	0.00084
6455	0.000643
6456	0.000359
6457	0.000528
6458	0.000625
6459	0.000431
6460	0.000168
6461	0.000182
6462	0.000167
6463	0.000234
6464	6.9e-05
6465	0.00043
6466	0.000847
6467	0.001129
6468	0.001072
6469	0.001324
6470	0.001106
6471	0.000443
6472	2.5e-05
6473	0.000176
6474	0.000245
6475	0.00028
6476	0.000383
6477	0.000542
6478	0.000544
6479	0.000366
6480	5.3e-05
6481	0.000426
6482	0.000697
6483	0.000776
6484	0.000275
6485	0.000378
6486	0.000272
6487	0.000541
6488	0.000255
6489	0.000438
6490	0.000395
6491	0.000114
6492	-0.000235
6493	0.000193
6494	0.000514
6495	0.000374
6496	0.000613
6497	0.000845
6498	0.000642
6499	0.000166
6500	-5e-06
6501	9.1e-05
6502	-5.6e-05
6503	0.000292
6504	0.000394
6505	0.000662
6506	0.000419
6507	0.000222
6508	0.000533
6509	0.000177
6510	0.000164
6511	0.000383
6512	-0.000131
6513	-0.000218
6514	-0.00021
6515	-0.000168
6516	-4.4e-05
6517	1.1e-05
6518	0.000139
6519	0.000544
6520	0.000473
6521	0.000271
6522	3.2e-05
6523	5e-05
6524	0.000359
6525	0.000503
6526	0.000576
6527	0.000321
6528	-6e-06
6529	0.000252
6530	0.000401
6531	-0.000127
6532	0.000119
6533	0.000674
6534	0.000851
6535	0.000339
6536	0.000197
6537	0.000131
6538	5e-05
6539	-8.2e-05
6540	1.5e-05
6541	0.000183
6542	0.000307
6543	0.000479
6544	0.000466
6545	0.000328
6546	-4.1e-05
6547	0.000117
6548	0.00012
6549	0.00021
6550	0.000615
6551	0.000267
6552	-0.000322
6553	-0.000533
6554	-0.000453
6555	-0.000129
6556	-6.6e-05
6557	0.000223
6558	0.000467
6559	0.000583
6560	0.00055
6561	0.000553
6562	0.000385
6563	0.000228
6564	0.000401
6565	0.000139
6566	-0.000212
6567	-0.0002
6568	-0.000114
6569	0.000297
6570	0.000241
6571	0.000526
6572	0.000532
6573	0.000529
6574	0.000162
6575	0.000266
6576	0.000227
6577	0.000221
6578	-4.1e-05
6579	-3e-06
6580	0.000693
6581	0.000749
6582	0.000499
6583	0.000422
6584	0.000563
6585	0.000432
6586	0.000251
6587	0.000114
6588	0.000288
6589	0.000538
6590	0.000513
6591	0.000403
6592	0.000381
6593	0.000448
6594	0.00034
6595	0.000381
6596	0.000507
6597	0.000472
6598	0.000439
6599	0.000429
6600	0.000739
6601	0.000487
6602	0.000152
6603	0.000318
6604	0.000845
6605	0.000534
6606	6e-05
6607	0.000208
6608	0.00052
6609	0.000228
6610	-5.4e-05
6611	-2e-05
6612	0.000261
6613	0.000234
6614	0.000235
6615	0.000246
6616	-0.000183
6617	-0.00031
6618	-0.000166
6619	8.6e-05
6620	-0.000245
6621	-0.000159
6622	-0.00018
6623	9e-06
6624	0.000144
6625	0.000383
6626	0.000576
6627	0.000561
6628	0.000167
6629	-0.000163
6630	0.000155
6631	0.000697
6632	0.00073
6633	0.000508
6634	0.000262
6635	0.000465
6636	0.000858
6637	0.000501
6638	9.8e-05
6639	3.2e-05
6640	0.00017
6641	0.00051
6642	0.000957
6643	0.000734
6644	0.000637
6645	0.000616
6646	0.000854
6647	0.000437
6648	0.000277
6649	1e-06
6650	-0.000382
6651	-0.000525
6652	-0.000164
6653	0.000192
6654	0.000176
6655	0.000251
6656	0.000536
6657	0.000719
6658	0.000436
6659	-0.0001
6660	8e-05
6661	0.000397
6662	0.000604
6663	0.000517
6664	0.000133
6665	-2.6e-05
6666	-3.7e-05
6667	6.5e-05
6668	0.000111
6669	8.2e-05
6670	7.6e-05
6671	0.000181
6672	0.000214
6673	5e-05
6674	-2.2e-05
6675	0.000326
6676	0.000124
6677	0.000331
6678	0.00018
6679	0.000153
6680	3.6e-05
6681	0.000322
6682	0.000593
6683	0.000455
6684	0.000173
6685	8.5e-05
6686	0.000385
6687	0.000301
6688	0.000761
6689	0.000965
6690	0.000719
6691	0.000286
6692	-0.000162
6693	-0.0005
6694	-0.000156
6695	0.000713
6696	0.001102
6697	0.001003
6698	0.000341
6699	-1.6e-05
6700	0.000187
6701	0.000196
6702	0.000559
6703	0.000532
6704	0.000426
6705	0.000121
6706	-6.2e-05
6707	0.000139
6708	0.000506
6709	0.000245
6710	2e-06
6711	-0.000267
6712	-8.1e-05
6713	0.000123
6714	0.00019
6715	2.9e-05
6716	0.000206
6717	0.000687
6718	0.001005
6719	0.000625
6720	0.000399
6721	0.000523
6722	0.000289
6723	0.000375
6724	0.000403
6725	0.000574
6726	0.000969
6727	0.000637
6728	0.000655
6729	0.000708
6730	0.000437
6731	0.000339
6732	0.000476
6733	0.000534
6734	0.000265
6735	0.000271
6736	-3.3e-05
6737	-5e-06
6738	0.00022
6739	0.000318
6740	0.000274
6741	0.000429
6742	0.000503
6743	0.000571
6744	0.000749
6745	0.000563
6746	0.000547
6747	0.000611
6748	0.000516
6749	0.000264
6750	1.2e-05
6751	0.000556
6752	0.000823
6753	0.000498
6754	2.9e-05
6755	8.4e-05
6756	-1.8e-05
6757	5.8e-05
6758	0.000138
6759	-3.4e-05
6760	-4.8e-05
6761	-0.000217
6762	0.000259
6763	0.000482
6764	0.000412
6765	0.000417
6766	0.00017
6767	-6.7e-05
6768	-0.000177
6769	-9.9e-05
6770	-0.000289
6771	3.4e-05
6772	9.4e-05
6773	4.3e-05
6774	0.000142
6775	0.000568
6776	0.000578
6777	0.000329
6778	0.000158
6779	0.000453
6780	0.001023
6781	0.000967
6782	0.000369
6783	-4e-05
6784	0.000231
6785	0.000292
6786	-1.2e-05
6787	-0.000371
6788	-0.000397
6789	-7.2e-05
6790	0.000202
6791	9.8e-05
6792	-5.8e-05
6793	-4.5e-05
6794	0.000672
6795	0.000944
6796	0.000688
6797	0.000122
6798	5e-05
6799	0.00014
6800	-0.000201
6801	-0.000202
6802	9.2e-05
6803	0.000129
6804	0.00012
6805	5.1e-05
6806	0.000297
6807	0.000494
6808	0.000306
6809	0.000367
6810	0.000191
6811	0.000145
6812	0.00014
6813	0.000556
6814	0.000915
6815	0.000983
6816	0.000636
6817	0.000564
6818	0.000448
6819	0.000229
6820	7.6e-05
6821	0.000438
6822	0.000449
6823	0.000458
6824	0.000334
6825	-2.9e-05
6826	0.0004
6827	0.00061
6828	0.000238
6829	0.000159
6830	0.000668
6831	0.000833
6832	0.000546
6833	0.000377
6834	0.000411
6835	0.000378
6836	0.00029
6837	0.000439
6838	0.000474
6839	0.000337
6840	0.000261
6841	0.000259
6842	0.000437
6843	0.000355
6844	0.000278
6845	0.000352
6846	0.000198
6847	2e-06
6848	0
6849	-0.000279
6850	-0.00014
6851	0.000247
6852	0.000197
6853	0.000346
6854	0.00053
6855	0.0005
6856	4.1e-05
6857	0.000303
6858	0.000507
6859	0.000462
6860	0.000647
6861	0.000823
6862	0.000712
6863	0.000456
6864	0.000355
6865	0.000769
6866	0.000963
6867	0.00073
6868	0.000157
6869	0.000455
6870	0.000646
6871	0.000691
6872	0.000229
6873	0.000236
6874	0.000197
6875	0.000103
6876	-7e-06
6877	0.0002
6878	0.000598
6879	0.000859
6880	0.00053
6881	0.000559
6882	0.000349
6883	2.8e-05
6884	-2.7e-05
6885	9.8e-05
6886	0.000368
6887	6.1e-05
6888	7e-06
6889	-0.000263
6890	0.000228
6891	0.000584
6892	0.000426
6893	0.000348
6894	0.00036
6895	-0.000149
6896	-0.000236
6897	-0.000246
6898	-3.8e-05
6899	0.000329
6900	0.000386
6901	0.000786
6902	0.00084
6903	0.000283
6904	0.000128
6905	0.00013
6906	0.000188
6907	0.000469
6908	0.000686
6909	0.000358
6910	0.000734
6911	0.000739
6912	0.0005
6913	0.000425
6914	0.000302
6915	0.000447
6916	0.000494
6917	0.000266
6918	0.000342
6919	0.000395
6920	0.000332
6921	0.000163
6922	-5e-06
6923	-1e-05
6924	-0.000116
6925	-0.000153
6926	0.000287
6927	0.000515
6928	0.000618
6929	0.000909
6930	0.000776
6931	0.000352
6932	0.000292
6933	-9e-05
6934	2.6e-05
6935	0.000628
6936	0.000468
6937	0.000142
6938	0.000245
6939	9.3e-05
6940	-0.000515
6941	-0.000649
6942	-0.000284
6943	-2.7e-05
6944	0.00027
6945	0.000675
6946	0.000864
6947	0.000565
6948	0.000528
6949	0.000704
6950	0.000467
6951	0.000272
6952	0.000159
6953	0.000509
6954	0.000578
6955	0.000135
6956	0.000108
6957	0.000494
6958	0.000655
6959	0.000336
6960	0.000316
6961	-0.000141
6962	0.000248
6963	0.000349
6964	0.000151
6965	0.000207
6966	-2e-05
6967	0.000157
6968	0.000176
6969	3.7e-05
6970	-3.7e-05
6971	0.000247
6972	0.000691
6973	0.001483
6974	0.000947
6975	0.000216
6976	1.4e-05
6977	0.000188
6978	0.000345
6979	8.2e-05
6980	-0.000356
6981	0.00015
6982	0.000811
6983	0.000905
6984	0.000506
6985	0.000339
6986	0.000221
6987	0.000222
6988	0.000443
6989	0.00025
6990	1.1e-05
6991	4e-06
6992	0.000156
6993	0.00026
6994	0.000144
6995	0.000363
6996	0.000465
6997	0.0002
6998	0.000251
6999	0.000508
7000	0.000395
7001	0.000267
7002	8.4e-05
7003	-4.6e-05
7004	0.000242
7005	0.000744
7006	0.000674
7007	0.000215
7008	0.000206
7009	0.000806
7010	0.001201
7011	0.000398
7012	9.2e-05
7013	3.1e-05
7014	0.000375
7015	0.000432
7016	0.00017
7017	0.000113
7018	-1.7e-05
7019	-4.4e-05
7020	-6e-06
7021	0.000306
7022	0.000625
7023	0.000522
7024	2.8e-05
7025	-0.00016
7026	-2.3e-05
7027	0.000516
7028	0.000534
7029	0.000374
7030	5.2e-05
7031	-1.2e-05
7032	9.1e-05
7033	0.000174
7034	0.000119
7035	0.000391
7036	0.000729
7037	0.000206
7038	0.000248
7039	0.000442
7040	0.000515
7041	0.00056
7042	0.000354
7043	0.000196
7044	0.000345
7045	0.000333
7046	6.9e-05
7047	0.000321
7048	0.000532
7049	0.000306
7050	0.000216
7051	0.000177
7052	0.000314
7053	-2.8e-05
7054	-0.000359
7055	-0.000384
7056	-2.6e-05
7057	0.00025
7058	0.000366
7059	0.00077
7060	0.000733
7061	0.001049
7062	0.000959
7063	0.00069
7064	0.000136
7065	9.3e-05
7066	0.00014
7067	-5.7e-05
7068	-0.000211
7069	-0.000214
7070	-0.000301
7071	-9.7e-05
7072	0.000324
7073	0.00042
7074	0.000232
7075	0.000281
7076	2e-06
7077	-0.000586
7078	-0.00071
7079	-0.000287
7080	-0.000202
7081	2.7e-05
7082	0.00031
7083	0.000226
7084	0.000129
7085	0.000235
7086	0.000375
7087	0.000452
7088	0.000422
7089	0.000203
7090	4.9e-05
7091	-8.8e-05
7092	-0.000325
7093	-0.000328
7094	-0.000157
7095	-8e-05
7096	0.000127
7097	3e-05
7098	-0.000115
7099	2e-06
7100	0.000211
7101	0.000287
7102	0.000267
7103	0.0004
7104	0.000381
7105	0.000523
7106	0.00062
7107	0.00074
7108	0.000515
7109	0.000441
7110	0.000359
7111	7.9e-05
7112	1.1e-05
7113	0.000307
7114	0.000318
7115	0.000149
7116	-0.000289
7117	1.6e-05
7118	0.000309
7119	0.000288
7120	-6.9e-05
7121	-4.6e-05
7122	0.000193
7123	0.000288
7124	0.000139
7125	0.000518
7126	0.000714
7127	0.000507
7128	9.2e-05
7129	0.00012
7130	0.000552
7131	0.00062
7132	0.000245
7133	0.000126
7134	-0.000134
7135	-0.000198
7136	-3e-06
7137	0.000411
7138	0.000367
7139	0.000421
7140	0.000373
7141	0.000535
7142	0.000547
7143	0.000607
7144	0.00074
7145	0.001295
7146	0.001159
7147	0.000887
7148	0.0002
7149	-9e-06
7150	0.00015
7151	0.000328
7152	0.000511
7153	0.000374
7154	0.000303
7155	0.000501
7156	0.000783
7157	0.000861
7158	0.001219
7159	0.00122
7160	0.00134
7161	0.000761
7162	0.000233
7163	0.000267
7164	0.000283
7165	7.1e-05
7166	1e-05
7167	-3.7e-05
7168	0.000113
7169	0.000274
7170	0.000197
7171	0.000188
7172	0.000547
7173	0.000675
7174	0.00053
7175	0.000357
7176	0.000307
7177	0.000485
7178	0.000507
7179	0.000596
7180	0.000615
7181	0.000482
7182	0.000223
7183	-4.5e-05
7184	-4.1e-05
7185	0.000251
7186	0.000386
7187	0.000608
7188	0.000972
7189	0.000621
7190	0.000547
7191	0.000386
7192	0.000456
7193	0.000228
7194	0.000337
7195	0.000407
7196	0.000116
7197	-0.000172
7198	0.000156
7199	0.000263
7200	0.00013
7201	0.000272
7202	0.000203
7203	0.000139
7204	0.000201
7205	0.000699
7206	0.000735
7207	0.000406
7208	0.000319
7209	0.000283
7210	0.000275
7211	-1.4e-05
7212	0.000265
7213	0.000569
7214	0.000367
7215	0.000691
7216	0.000791
7217	0.000652
7218	0.000499
7219	0.000554
7220	0.000357
7221	0.000223
7222	0.00013
7223	0.000109
7224	0.000354
7225	0.000374
7226	0.00039
7227	0.000142
7228	0.000237
7229	0.000621
7230	0.000335
7231	0.000294
7232	0.000521
7233	0.000547
7234	5.6e-05
7235	-7.1e-05
7236	0.000138
7237	0.000371
7238	0.000492
7239	0.000436
7240	0.000545
7241	0.000142
7242	0.000148
7243	0.000764
7244	0.001182
7245	0.001118
7246	0.000702
7247	4.9e-05
7248	9e-06
7249	0.000393
7250	0.000772
7251	0.000609
7252	0.000314
7253	-1.3e-05
7254	0.000285
7255	0.000435
7256	0.000142
7257	0.000176
7258	-4e-06
7259	-2.6e-05
7260	9e-06
7261	9.5e-05
7262	3.8e-05
7263	3.5e-05
7264	1.9e-05
7265	0.0002
7266	0.000499
7267	0.000342
7268	-4e-05
7269	0.000117
7270	0.000357
7271	0.000293
7272	8.9e-05
7273	6.6e-05
7274	0.000238
7275	0.000476
7276	0.00056
7277	0.000538
7278	0.00089
7279	0.0008
7280	0.000757
7281	0.000459
7282	0.0006
7283	0.000599
7284	0.000618
7285	0.00047
7286	5.7e-05
7287	0.000433
7288	0.000672
7289	0.000725
7290	0.000812
7291	0.000375
7292	0.000469
7293	0.000599
7294	0.00053
7295	0.00036
7296	0.000339
7297	0.000544
7298	0.000561
7299	0.000322
7300	-1.7e-05
7301	0.000207
7302	0.00057
7303	0.000448
7304	0.000119
7305	0.000295
7306	0.00027
7307	-5.3e-05
7308	1.8e-05
7309	-8.5e-05
7310	-5.1e-05
7311	0.000349
7312	0.000161
7313	0.000199
7314	0.000177
7315	0.000248
7316	0.000386
7317	0.000421
7318	0.000409
7319	0.000594
7320	0.000108
7321	-0.000278
7322	-0.000258
7323	0.000174
7324	0.000219
7325	-8.4e-05
7326	-0.000336
7327	-3.9e-05
7328	0.000574
7329	0.000718
7330	0.000118
7331	0.000195
7332	0.000135
7333	0.000266
7334	1.3e-05
7335	3.6e-05
7336	0.000439
7337	0.000406
7338	0.000121
7339	7.9e-05
7340	0.000317
7341	0.000637
7342	0.000547
7343	0.0002
7344	5.8e-05
7345	0.000236
7346	0.000397
7347	0.000355
7348	0.000247
7349	-9.3e-05
7350	-0.000169
7351	0.000373
7352	0.000312
7353	0.00045
7354	0.000285
7355	0.000465
7356	0.000534
7357	0.000436
7358	0.000199
7359	0.000186
7360	0.000336
7361	0.000116
7362	0.000132
7363	0.000164
7364	-0.000145
7365	-0.000409
7366	-0.000202
7367	6.5e-05
7368	0.000244
7369	0.000262
7370	0.000236
7371	0.000749
7372	0.001
7373	0.000745
7374	0.000306
7375	-0.000163
7376	-0.000263
7377	8.5e-05
7378	0.000546
7379	0.00075
7380	0.000631
7381	0.000767
7382	0.000575
7383	-0.0001
7384	-7.8e-05
7385	0.000438
7386	0.000546
7387	0.000793
7388	0.000497
7389	-0.000131
7390	-0.000148
7391	0.00042
7392	0.000488
7393	0.000662
7394	0.00032
7395	0.000271
7396	0.000685
7397	0.000392
7398	0.000227
7399	0.00025
7400	0.000141
7401	0.000497
7402	0.000402
7403	8e-05
7404	0.000119
7405	0.000366
7406	0.0004
7407	0.000608
7408	0.000406
7409	0.000213
7410	0.000224
7411	0.000228
7412	-5.4e-05
7413	-0.000198
7414	-0.000304
7415	-1.6e-05
7416	0.000374
7417	0.00014
7418	2e-05
7419	0.000195
7420	0.00035
7421	0.000311
7422	0.000498
7423	0.000168
7424	0.000329
7425	0.000449
7426	0.00056
7427	0.000413
7428	5e-06
7429	-0.000202
7430	0.000119
7431	0.000337
7432	0.000431
7433	0.000495
7434	0.000379
7435	0.000182
7436	0.000269
7437	-0.000106
7438	4e-06
7439	0.000339
7440	0.000157
7441	2.7e-05
7442	-9.8e-05
7443	-8.4e-05
7444	7.3e-05
7445	0.000134
7446	0.000143
7447	0.000296
7448	0.000313
7449	0.000234
7450	2.1e-05
7451	0.000248
7452	0.000296
7453	8.6e-05
7454	5.6e-05
7455	0.000329
7456	0.000254
7457	0.000164
7458	-6.1e-05
7459	0.000326
7460	0.000442
7461	-0.000276
7462	-0.00024
7463	0.000316
7464	0.000405
7465	0.000542
7466	0.000441
7467	0.000484
7468	0.000382
7469	0.000148
7470	4.9e-05
7471	0.00047
7472	0.000521
7473	0.000294
7474	0.000301
7475	0.00024
7476	1.8e-05
7477	0.000194
7478	0.000415
7479	0.00065
7480	0.000641
7481	0.000757
7482	0.00059
7483	0.000303
7484	0.000328
7485	0.000327
7486	0.000414
7487	0.000374
7488	0.00071
7489	0.000893
7490	0.00076
7491	0.000105
7492	0.000111
7493	-0.000147
7494	-0.000306
7495	3.9e-05
7496	0.000407
7497	0.000247
7498	0.000213
7499	0.000823
7500	0.000858
7501	0.000437
7502	0.000307
7503	2.8e-05
7504	-0.000108
7505	0.000315
7506	0.00043
7507	5.4e-05
7508	7e-06
7509	2.8e-05
7510	0.000173
7511	0.000202
7512	0.000131
7513	0.0002
7514	0.000421
7515	0.000457
7516	0.000255
7517	3.1e-05
7518	0.000116
7519	0.000213
7520	0.000307
7521	0.000592
7522	0.000915
7523	0.000828
7524	0.00056
7525	0.000196
7526	0.000325
7527	0.000252
7528	0.000271
7529	0.000157
7530	-7.7e-05
7531	0.000145
7532	-5.7e-05
7533	-0.000204
7534	-0.000155
7535	0.000375
7536	0.000472
7537	0.000172
7538	9.5e-05
7539	0.000363
7540	0.000474
7541	0.000169
7542	0.000151
7543	0.000472
7544	0.000821
7545	0.000971
7546	0.000774
7547	0.000433
7548	0.000425
7549	0.000765
7550	0.000413
7551	-5.9e-05
7552	3.1e-05
7553	0.000393
7554	0.000146
7555	-0.000155
7556	-4.4e-05
7557	0.000295
7558	0.000334
7559	0.000278
7560	0.000111
7561	0.000198
7562	5e-06
7563	-0.000148
7564	-0.000362
7565	-6.1e-05
7566	0.000283
7567	0.000324
7568	0.000201
7569	0.000282
7570	0.000266
7571	0.000312
7572	0.000368
7573	0.000138
7574	0.000256
7575	0.000632
7576	0.000712
7577	0.000337
7578	5.5e-05
7579	9.6e-05
7580	0.000372
7581	0.000378
7582	0.000369
7583	0.000153
7584	0.000408
7585	0.000326
7586	0.000319
7587	6.4e-05
7588	5.2e-05
7589	-4e-05
7590	0.000218
7591	0.000572
7592	0.000535
7593	0.000438
7594	9.2e-05
7595	0.000164
7596	-0.000108
7597	-8.1e-05
7598	0.000152
7599	0.000224
7600	-7.8e-05
7601	1e-05
7602	-3.6e-05
7603	0.000302
7604	0.000735
7605	0.000572
7606	0.000392
7607	0.000189
7608	0.000155
7609	0.000613
7610	0.000612
7611	0.000637
7612	0.000626
7613	0.000539
7614	0.000515
7615	0.000568
7616	0.000474
7617	0.000278
7618	-0.000144
7619	4e-05
7620	-0.00018
7621	-3.8e-05
7622	0.000383
7623	0.000531
7624	0.000502
7625	0.00038
7626	0.000271
7627	9.5e-05
7628	4.9e-05
7629	0.00039
7630	0.000145
7631	0.000187
7632	0.000613
7633	0.000976
7634	0.000366
7635	0.000464
7636	0.000392
7637	0.000225
7638	0.000213
7639	0.000617
7640	0.000514
7641	-3.1e-05
7642	5e-05
7643	0.000265
7644	0.000419
7645	0.000527
7646	0.000507
7647	0.000789
7648	0.000602
7649	0.000653
7650	0.00059
7651	0.000764
7652	0.000485
7653	0.000348
7654	0.000204
7655	-0.000114
7656	-0.000163
7657	0.000351
7658	0.000617
7659	0.000385
7660	0.000438
7661	-0.00014
7662	-0.0002
7663	0.000284
7664	0.000119
7665	-5.9e-05
7666	7.4e-05
7667	0.000596
7668	0.000599
7669	0.000596
7670	0.000878
7671	0.00097
7672	0.000486
7673	6.4e-05
7674	3.8e-05
7675	0.00026
7676	-0.000223
7677	-0.000274
7678	4e-05
7679	3.3e-05
7680	0.00015
7681	0.000197
7682	0.000239
7683	0.000464
7684	0.000355
7685	0.000222
7686	0.000307
7687	0.000578
7688	0.000291
7689	0.000212
7690	8.8e-05
7691	2.6e-05
7692	0.000382
7693	0.000519
7694	0.000673
7695	0.000446
7696	0.000447
7697	0.000396
7698	0.000666
7699	0.00102
7700	0.000886
7701	0.000295
7702	-0.000123
7703	-0.000108
7704	-4.3e-05
7705	-3.2e-05
7706	-6.8e-05
7707	2e-05
7708	0.000325
7709	0.000683
7710	0.000953
7711	0.000933
7712	0.000574
7713	0.000423
7714	0.000457
7715	0.000425
7716	0.000389
7717	-0.000116
7718	-0.000118
7719	0.000286
7720	0.000834
7721	0.000988
7722	0.000962
7723	0.000273
7724	0.000533
7725	0.000961
7726	0.000819
7727	0.000489
7728	0.000511
7729	0.000234
7730	7e-06
7731	-0.000202
7732	-9.8e-05
7733	2.5e-05
7734	0.000267
7735	8e-05
7736	-0.000142
7737	-9.4e-05
7738	7.7e-05
7739	0.000403
7740	0.000475
7741	0.000578
7742	0.000556
7743	0.000171
7744	0.000165
7745	0.000254
7746	3.4e-05
7747	0.000189
7748	0.000319
7749	0.000276
7750	0.000102
7751	0.000214
7752	0.00024
7753	0.000339
7754	0.000215
7755	0.000339
7756	0.000464
7757	0.000247
7758	-3e-05
7759	-0.000278
7760	1.4e-05
7761	0.000444
7762	0.000506
7763	0.000429
7764	0.000187
7765	5.2e-05
7766	0.000405
7767	0.000403
7768	-3.2e-05
7769	-0.000238
7770	-0.000117
7771	-6.8e-05
7772	-6.4e-05
7773	6.4e-05
7774	7e-05
7775	0.000135
7776	0.00022
7777	0.000456
7778	0.000634
7779	0.000716
7780	0.000578
7781	8.7e-05
7782	-8.1e-05
7783	0.000148
7784	0.000518
7785	0.000822
7786	0.000804
7787	0.000216
7788	0.000422
7789	0.000432
7790	0.000353
7791	8.9e-05
7792	-4.9e-05
7793	0.000184
7794	0.000688
7795	0.000604
7796	0.000468
7797	0.000356
7798	0.000237
7799	0.000211
7800	-0.000115
7801	-0.000353
7802	-0.000158
7803	2.3e-05
7804	-8.6e-05
7805	4.6e-05
7806	0.000157
7807	0.000133
7808	9e-05
7809	-7.1e-05
7810	0.000106
7811	8e-06
7812	0.000472
7813	0.000812
7814	0.000536
7815	0.000238
7816	-3.1e-05
7817	-0.000402
7818	-0.000382
7819	2.2e-05
7820	0.000126
7821	-3.3e-05
7822	7.9e-05
7823	0.000337
7824	0.000439
7825	0.000271
7826	0.000229
7827	0.000401
7828	-1.4e-05
7829	9.4e-05
7830	0.00065
7831	0.000285
7832	6.2e-05
7833	0.000143
7834	0.000406
7835	0.000411
7836	0.000446
7837	0.000666
7838	0.000532
7839	0.000431
7840	9.8e-05
7841	0.000156
7842	0.000218
7843	-0.000334
7844	-0.000315
7845	-1.3e-05
7846	0.000204
7847	0.000406
7848	0.000495
7849	0.000514
7850	0.000239
7851	-2e-06
7852	-2.8e-05
7853	-0.000131
7854	0.000299
7855	0.000431
7856	0.000333
7857	0.000485
7858	0.000584
7859	0.000348
7860	0.000234
7861	0.000196
7862	-0.000132
7863	-0.000116
7864	0.000412
7865	0.000633
7866	0.000119
7867	-3e-06
7868	-9.3e-05
7869	0.000287
7870	0.000922
7871	0.000999
7872	0.00066
7873	0.000556
7874	0.000848
7875	0.00083
7876	0.000422
7877	0.000232
7878	0.00045
7879	0.000428
7880	0.000573
7881	0.000809
7882	0.000964
7883	0.000985
7884	0.000439
7885	0.000116
7886	0.000195
7887	0.000694
7888	0.000637
7889	0.000579
7890	0.000507
7891	0.000189
7892	0.000273
7893	0.000512
7894	0.000563
7895	0.000553
7896	0.000689
7897	0.000406
7898	0.00052
7899	0.000612
7900	0.000309
7901	0.000328
7902	0.000296
7903	3.8e-05
7904	-1.4e-05
7905	0.000192
7906	0.000256
7907	0.000326
7908	-6.3e-05
7909	1.6e-05
7910	5.7e-05
7911	0.000134
7912	-1.5e-05
7913	-0.000229
7914	-0.000104
7915	0.000132
7916	0.000472
7917	0.000916
7918	0.000182
7919	-0.00035
7920	0.000181
7921	0.000758
7922	0.000463
7923	0.000393
7924	0.000527
7925	0.000624
7926	0.000484
7927	0.000685
7928	0.000675
7929	0.001053
7930	0.000691
7931	0.000622
7932	0.000268
7933	0.000362
7934	0.00069
7935	0.000645
7936	0.000241
7937	3.8e-05
7938	2.3e-05
7939	0.000168
7940	0.000244
7941	0.000155
7942	-3e-06
7943	-3.4e-05
7944	-2.9e-05
7945	0.000506
7946	0.000405
7947	0.000106
7948	-2.8e-05
7949	0.000129
7950	8e-05
7951	0.00019
7952	3.4e-05
7953	0.000158
7954	0.000371
7955	0.000391
7956	0.000316
7957	0.000444
7958	0.000144
7959	-0.000268
7960	-0.000249
7961	0.000335
7962	0.000433
7963	9.1e-05
7964	0.000321
7965	0.000473
7966	0.000659
7967	0.00032
7968	0.000245
7969	0.000253
7970	0.000587
7971	0.000431
7972	0.000145
7973	-0.000227
7974	-3.6e-05
7975	-0.000133
7976	0.000278
7977	0.000729
7978	0.000536
7979	6.1e-05
7980	-2.7e-05
7981	0.000195
7982	9.6e-05
7983	-0.000213
7984	-0.000288
7985	0.000309
7986	0.000738
7987	0.00065
7988	0.000424
7989	0.000363
7990	0.000498
7991	0.000629
7992	0.000424
7993	0.000164
7994	0.00011
7995	2.1e-05
7996	-0.000251
7997	-0.000301
7998	-2.1e-05
[truncated: 4,001 more rows]

## Sheet: WT Replicate 2
Time	UV
6000	-0.027044
6001	-0.027122
6002	-0.026837
6003	-0.026401
6004	-0.026484
6005	-0.026548
6006	-0.02645
6007	-0.026384
6008	-0.026722
6009	-0.026854
6010	-0.026978
6011	-0.026809
6012	-0.026681
6013	-0.026692
6014	-0.026914
6015	-0.026668
6016	-0.026998
6017	-0.026853
6018	-0.02673
6019	-0.026836
6020	-0.02721
6021	-0.026713
6022	-0.026477
6023	-0.02686
6024	-0.026991
6025	-0.026744
6026	-0.026348
6027	-0.026328
6028	-0.026627
6029	-0.026812
6030	-0.026954
6031	-0.026787
6032	-0.026524
6033	-0.026509
6034	-0.026617
6035	-0.026706
6036	-0.026595
6037	-0.026413
6038	-0.026812
6039	-0.027246
6040	-0.027399
6041	-0.026795
6042	-0.026225
6043	-0.026428
6044	-0.026521
6045	-0.026744
6046	-0.027231
6047	-0.027109
6048	-0.027267
6049	-0.027308
6050	-0.027262
6051	-0.027251
6052	-0.027031
6053	-0.026125
6054	-0.026375
6055	-0.027026
6056	-0.026821
6057	-0.026497
6058	-0.026694
6059	-0.026799
6060	-0.026967
6061	-0.026575
6062	-0.026413
6063	-0.026761
6064	-0.026721
6065	-0.027048
6066	-0.027367
6067	-0.027439
6068	-0.027326
6069	-0.027252
6070	-0.026855
6071	-0.026549
6072	-0.026479
6073	-0.026533
6074	-0.026582
6075	-0.026021
6076	-0.02624
6077	-0.026817
6078	-0.026966
6079	-0.026521
6080	-0.026493
6081	-0.026879
6082	-0.026915
6083	-0.026871
6084	-0.026691
6085	-0.026437
6086	-0.026872
6087	-0.027535
6088	-0.027388
6089	-0.026987
6090	-0.026724
6091	-0.026298
6092	-0.02616
6093	-0.026701
6094	-0.026354
6095	-0.025903
6096	-0.02624
6097	-0.026747
6098	-0.02674
6099	-0.026921
6100	-0.027146
6101	-0.027157
6102	-0.027021
6103	-0.026729
6104	-0.026778
6105	-0.026819
6106	-0.02689
6107	-0.02725
6108	-0.027178
6109	-0.027207
6110	-0.026806
6111	-0.026617
6112	-0.026175
6113	-0.02628
6114	-0.026499
6115	-0.026496
6116	-0.026459
6117	-0.02678
6118	-0.02634
6119	-0.026283
6120	-0.026665
6121	-0.026813
6122	-0.026536
6123	-0.026607
6124	-0.026953
6125	-0.026888
6126	-0.026599
6127	-0.02665
6128	-0.02665
6129	-0.026958
6130	-0.02694
6131	-0.027065
6132	-0.027296
6133	-0.026922
6134	-0.026587
6135	-0.026429
6136	-0.026794
6137	-0.026758
6138	-0.026601
6139	-0.026915
6140	-0.027041
6141	-0.026724
6142	-0.026777
6143	-0.026621
6144	-0.026746
6145	-0.027112
6146	-0.027057
6147	-0.026982
6148	-0.026582
6149	-0.026634
6150	-0.026899
6151	-0.027055
6152	-0.026797
6153	-0.026755
6154	-0.026847
6155	-0.026661
6156	-0.026774
6157	-0.026491
6158	-0.026737
6159	-0.026627
6160	-0.0266
6161	-0.026383
6162	-0.02661
6163	-0.026472
6164	-0.026406
6165	-0.026801
6166	-0.026787
6167	-0.026752
6168	-0.026577
6169	-0.026633
6170	-0.026662
6171	-0.026973
6172	-0.026857
6173	-0.026945
6174	-0.026838
6175	-0.026723
6176	-0.02679
6177	-0.026904
6178	-0.026862
6179	-0.026536
6180	-0.026563
6181	-0.026956
6182	-0.02725
6183	-0.027345
6184	-0.02722
6185	-0.027142
6186	-0.026685
6187	-0.026372
6188	-0.026323
6189	-0.026652
6190	-0.027042
6191	-0.027146
6192	-0.026941
6193	-0.026756
6194	-0.02659
6195	-0.026528
6196	-0.026712
6197	-0.026711
6198	-0.027132
6199	-0.02702
6200	-0.026798
6201	-0.026953
6202	-0.027169
6203	-0.027086
6204	-0.02699
6205	-0.026761
6206	-0.026804
6207	-0.02672
6208	-0.027054
6209	-0.026694
6210	-0.02678
6211	-0.026929
6212	-0.026945
6213	-0.026691
6214	-0.027089
6215	-0.027606
6216	-0.027339
6217	-0.026868
6218	-0.026663
6219	-0.026844
6220	-0.026988
6221	-0.027273
6222	-0.02718
6223	-0.026984
6224	-0.027282
6225	-0.027337
6226	-0.02689
6227	-0.026708
6228	-0.026823
6229	-0.027045
6230	-0.027228
6231	-0.027105
6232	-0.026864
6233	-0.026632
6234	-0.026588
6235	-0.026921
6236	-0.026976
6237	-0.026957
6238	-0.027073
6239	0
6240	-0.00013
6241	-0.000494
6242	-0.000699
6243	-0.00053
6244	-0.00073
6245	-0.000804
6246	-0.000735
6247	-0.00065
6248	-0.000836
6249	-0.00091
6250	-0.000206
6251	-0.000457
6252	-0.000671
6253	-0.000358
6254	-0.000339
6255	-0.000989
6256	-0.001313
6257	-0.00152
6258	-0.001277
6259	-0.000867
6260	-0.000703
6261	-0.000904
6262	-0.001281
6263	-0.001471
6264	-0.001122
6265	-0.000385
6266	-0.000369
6267	-0.000755
6268	-0.000625
6269	-0.00092
6270	-0.000946
6271	-0.000907
6272	-0.000639
6273	-0.000739
6274	-0.00086
6275	-0.000938
6276	-0.000984
6277	-0.001451
6278	-0.001439
6279	-0.000848
6280	-0.000588
6281	-0.000513
6282	-0.000642
6283	-0.0006
6284	-0.000738
6285	-0.000668
6286	-0.00068
6287	-0.000833
6288	-0.001106
6289	-0.001019
6290	-0.000752
6291	-0.000755
6292	-0.001039
6293	-0.000867
6294	-0.000593
6295	-0.000506
6296	-0.000498
6297	-0.000338
6298	-0.000405
6299	-0.000663
6300	-0.000763
6301	-0.000953
6302	-0.000984
6303	-0.000887
6304	-0.000891
6305	-0.000953
6306	-0.000913
6307	-0.000918
6308	-0.000562
6309	-0.000596
6310	-0.000602
6311	-0.000939
6312	-0.001072
6313	-0.000733
6314	-0.000278
6315	-0.000491
6316	-0.000757
6317	-0.000589
6318	-0.000167
6319	-0.000202
6320	-0.000437
6321	-0.000462
6322	-0.000309
6323	2.3e-05
6324	-0.000153
6325	-0.000493
6326	-0.000775
6327	-0.001093
6328	-0.000962
6329	-0.000546
6330	-0.000603
6331	-0.000969
6332	-0.000807
6333	-0.000998
6334	-0.000941
6335	-0.000948
6336	-0.000961
6337	-0.001025
6338	-0.001019
6339	-0.001145
6340	-0.001274
6341	-0.001197
6342	-0.000449
6343	-0.000365
6344	-0.000646
6345	-0.000431
6346	-0.000273
6347	-0.000572
6348	-0.000113
6349	-0.000147
6350	-0.00038
6351	-0.000724
6352	-0.000655
6353	-0.000956
6354	-0.000846
6355	-0.000412
6356	-8.1e-05
6357	-0.000322
6358	-0.000167
6359	-0.000363
6360	-0.000621
6361	-0.000729
6362	-0.001029
6363	-0.000882
6364	-0.000767
6365	-0.000843
6366	-0.00073
6367	-0.000697
6368	-0.000772
6369	-0.000674
6370	-0.000949
6371	-0.000847
6372	-0.000743
6373	-0.000721
6374	-0.000808
6375	-0.000903
6376	-0.000895
6377	-0.001044
6378	-0.001149
6379	-0.000841
6380	-0.000905
6381	-0.001127
6382	-0.000794
6383	-0.000273
6384	-0.000536
6385	-0.001317
6386	-0.001409
6387	-0.001131
6388	-0.000696
6389	-0.000879
6390	-0.000763
6391	-0.000604
6392	-0.00044
6393	-0.000592
6394	-0.000901
6395	-0.001043
6396	-0.00102
6397	-0.001018
6398	-0.000896
6399	-0.000949
6400	-0.000629
6401	-0.000706
6402	-0.000973
6403	-0.000736
6404	-0.000901
6405	-0.000744
6406	-0.001367
6407	-0.001269
6408	-0.001085
6409	-0.001124
6410	-0.001089
6411	-0.001017
6412	-0.000894
6413	-0.000751
6414	-0.00045
6415	-0.000827
6416	-0.000499
6417	-0.000294
6418	-0.000621
6419	-0.00128
6420	-0.001484
6421	-0.001069
6422	-0.000856
6423	-0.000803
6424	-0.001058
6425	-0.001086
6426	-0.000775
6427	-0.000847
6428	-0.00112
6429	-0.001421
6430	-0.001263
6431	-0.000849
6432	-0.000758
6433	-0.000867
6434	-0.000917
6435	-0.000974
6436	-0.00086
6437	-0.000589
6438	-0.000452
6439	-0.000531
6440	-0.000646
6441	-0.000559
6442	-0.000291
6443	-0.00026
6444	-0.000551
6445	-0.001077
6446	-0.001154
6447	-0.00112
6448	-0.000991
6449	-0.000981
6450	-0.001291
6451	-0.000774
6452	-0.000998
6453	-0.000654
6454	-0.000326
6455	-0.000299
6456	-0.000323
6457	-0.000645
6458	-0.001044
6459	-0.001152
6460	-0.000788
6461	-0.000504
6462	-0.000468
6463	-0.000425
6464	-0.000516
6465	-0.000771
6466	-0.001003
6467	-0.000979
6468	-0.000719
6469	-0.001066
6470	-0.001431
6471	-0.00127
6472	-0.000534
6473	-0.000305
6474	-0.000976
6475	-0.001163
6476	-0.000909
6477	-0.000633
6478	-0.000815
6479	-0.000592
6480	-0.000307
6481	-0.000662
6482	-0.001044
6483	-0.001133
6484	-0.000258
6485	-0.000121
6486	-0.000629
6487	-0.00083
6488	-0.000504
6489	-0.000514
6490	-0.000433
6491	-0.000608
6492	-0.000582
6493	-0.00094
6494	-0.000928
6495	-0.000737
6496	-0.000781
6497	-0.001009
6498	-0.000792
6499	-0.00095
6500	-0.000838
6501	-0.000478
6502	-0.000952
6503	-0.000921
6504	-0.001034
6505	-0.000628
6506	-0.000759
6507	-0.00109
6508	-0.00117
6509	-0.000713
6510	-0.000793
6511	-0.000377
6512	-0.000361
6513	-0.000734
6514	-0.000822
6515	-0.000581
6516	-0.000141
6517	-0.000194
6518	-0.000381
6519	-0.000921
6520	-0.000995
6521	-0.000889
6522	-0.000681
6523	-0.000693
6524	-0.000551
6525	-0.000693
6526	-0.000696
6527	-0.00051
6528	-0.001036
6529	-0.000896
6530	-0.000308
6531	-9.8e-05
6532	-0.000154
6533	-0.000432
6534	-0.000877
6535	-0.001128
6536	-0.001192
6537	-0.000767
6538	-0.000606
6539	-0.000742
6540	-0.000799
6541	-0.000629
6542	-0.000693
6543	-0.000361
6544	-0.000576
6545	-0.000928
6546	-0.000993
6547	-0.001029
6548	-0.001295
6549	-0.001461
6550	-0.001252
6551	-0.001082
6552	-0.000857
6553	-0.000636
6554	-0.000888
6555	-0.001024
6556	-0.001048
6557	-0.001144
6558	-0.001064
6559	-0.000846
6560	-0.000387
6561	-0.000342
6562	-0.000523
6563	-0.000485
6564	-0.000497
6565	-0.000494
6566	-0.000778
6567	-0.000931
6568	-0.000946
6569	-0.000626
6570	-0.000606
6571	-0.000743
6572	-0.001021
6573	-0.00117
6574	-0.001255
6575	-0.000898
6576	-0.000359
6577	-0.000691
6578	-0.000205
6579	-0.000176
6580	-0.000582
6581	-0.00135
6582	-0.00115
6583	-0.001075
6584	-0.000705
6585	-0.000998
6586	-0.000967
6587	-0.00124
6588	-0.001022
6589	-0.000575
6590	-0.000497
6591	-0.000722
6592	-0.000993
6593	-0.001001
6594	-0.000899
6595	-0.000764
6596	-0.000691
6597	-0.001179
6598	-0.000991
6599	-0.000516
6600	-0.000358
6601	-0.000587
6602	-0.001058
6603	-0.001202
6604	-0.000737
6605	-0.000737
6606	-0.00044
6607	-0.000181
6608	-0.000401
6609	-0.000736
6610	-0.001012
6611	-0.000808
6612	-0.000793
6613	-0.000845
6614	-0.000819
6615	-0.000803
6616	-0.000706
6617	-0.000792
6618	-0.000845
6619	-0.001039
6620	-0.000813
6621	-0.000448
6622	-0.000337
6623	-0.0004
6624	-0.0005
6625	-0.00062
6626	-0.000855
6627	-0.000723
6628	-0.00058
6629	-0.000684
6630	-0.000653
6631	-0.000487
6632	-0.0005
6633	-0.000631
6634	-0.000951
6635	-0.000973
6636	-0.001064
6637	-0.000756
6638	-0.000213
6639	-0.000183
6640	-0.000361
6641	-0.000745
6642	-0.000783
6643	-0.000726
6644	-0.000699
6645	-0.000543
6646	-0.000343
6647	-0.000219
6648	0.000124
6649	-0.000204
6650	-0.00046
6651	-0.000738
6652	-0.000791
6653	-0.000857
6654	-0.000921
6655	-0.000638
6656	-0.000269
6657	-0.000267
6658	-0.000747
6659	-0.001239
6660	-0.001136
6661	-0.001156
6662	-0.00096
6663	-0.000901
6664	-0.000799
6665	-0.00107
6666	-0.001123
6667	-0.000996
6668	-0.001047
6669	-0.001111
6670	-0.0011
6671	-0.000954
6672	-0.000873
6673	-0.000858
6674	-0.001172
6675	-0.000926
6676	-0.000963
6677	-0.001015
6678	-0.001056
6679	-0.000967
6680	-0.000975
6681	-0.000869
6682	-0.000599
6683	-0.000812
6684	-0.001236
6685	-0.000891
6686	-0.000613
6687	-0.000704
6688	-0.001122
6689	-0.000927
6690	-0.000201
6691	-0.000301
6692	-0.000436
6693	-0.000287
6694	-0.000129
6695	-0.000856
6696	-0.001221
6697	-0.001028
6698	-0.000729
6699	-0.001105
6700	-0.000759
6701	-0.000707
6702	-0.000596
6703	-0.00068
6704	-0.00048
6705	-0.000637
6706	-0.000769
6707	-0.000518
6708	-0.000547
6709	-0.001001
6710	-0.001075
6711	-0.000414
6712	-0.000284
6713	-0.000526
6714	-0.000603
6715	-0.000752
6716	-0.000689
6717	-0.001085
6718	-0.00144
6719	-0.00155
6720	-0.001305
6721	-0.001068
6722	-0.000793
6723	-0.000659
6724	-0.000556
6725	-0.000619
6726	-0.000853
6727	-0.000888
6728	-0.001006
6729	-0.000783
6730	-0.000598
6731	-0.000563
6732	-0.000611
6733	-0.000619
6734	-0.000641
6735	-0.000927
6736	-0.001091
6737	-0.001055
6738	-0.001033
6739	-0.001057
6740	-0.000654
6741	-0.000544
6742	-0.000828
6743	-0.000978
6744	-0.000911
6745	-0.001289
6746	-0.000709
6747	-0.00022
6748	-0.000167
6749	-0.000649
6750	-0.000945
6751	-0.000818
6752	-0.000518
6753	-0.000601
6754	-0.000756
6755	-0.00045
6756	-0.000194
6757	-0.00037
6758	-0.000549
6759	-0.000741
6760	-0.001526
6761	-0.001553
6762	-0.000915
6763	-7.6e-05
6764	0.000213
6765	-0.000177
6766	-0.000321
6767	-0.000355
6768	-0.000512
6769	-0.000959
6770	-0.000912
6771	-0.000634
6772	-0.000927
6773	-0.000747
6774	-0.000828
6775	-0.00095
6776	-0.000821
6777	-0.0007
6778	-0.000349
6779	-0.000184
6780	-0.000413
6781	-0.001095
6782	-0.001212
6783	-0.001047
6784	-0.000841
6785	-0.000902
6786	-0.000589
6787	0.000179
6788	-0.000118
6789	-0.001125
6790	-0.001168
6791	-0.000535
6792	-0.000415
6793	-0.000335
6794	-0.000126
6795	-0.000266
6796	-0.000437
6797	-0.000822
6798	-0.000713
6799	-0.000643
6800	-0.001131
6801	-0.000804
6802	-0.000646
6803	-0.000623
6804	-6.5e-05
6805	-0.000219
6806	-0.000728
6807	-0.001127
6808	-0.00041
6809	-3.5e-05
6810	5.1e-05
6811	-0.000453
6812	-0.001002
6813	-0.001318
6814	-0.000869
6815	-0.000394
6816	-0.000513
6817	-0.000688
6818	-0.000578
6819	-0.000124
6820	-0.000528
6821	-0.000925
6822	-0.000921
6823	-0.000796
6824	-0.000655
6825	-0.000646
6826	-0.000637
6827	-0.000792
6828	-0.000688
6829	-0.000801
6830	-0.000921
6831	-0.000981
6832	-0.000778
6833	-0.001019
6834	-0.000899
6835	-0.001009
6836	-0.000896
6837	-0.000715
6838	-0.000466
6839	-0.000711
6840	-0.001162
6841	-0.001021
6842	-0.001102
6843	-0.000878
6844	-0.000829
6845	-0.000519
6846	-0.000417
6847	-0.001087
6848	-0.001138
6849	-0.000954
6850	-0.000606
6851	-0.000464
6852	-0.000445
6853	-0.000503
6854	-0.000584
6855	-0.000994
6856	-0.001163
6857	-0.001164
6858	-0.000993
6859	-0.00072
6860	-0.000427
6861	-0.000785
6862	-0.000886
6863	-0.00092
6864	-0.001006
6865	-0.001221
6866	-0.001067
6867	-0.000949
6868	-0.000478
6869	-0.000486
6870	-0.000547
6871	4.2e-05
6872	0.000109
6873	-0.000321
6874	-0.000948
6875	-0.001659
6876	-0.001844
6877	-0.001557
6878	-0.001087
6879	-0.000799
6880	-0.000641
6881	-0.000691
6882	-0.000569
6883	-0.000916
6884	-0.00081
6885	-0.000403
6886	-0.000406
6887	-0.000891
6888	-0.000951
6889	-0.000891
6890	-0.000744
6891	-0.000159
6892	-0.00024
6893	-0.000756
6894	-0.000847
6895	-0.000645
6896	-0.001013
6897	-0.001151
6898	-0.001189
6899	-0.000995
6900	-0.000995
6901	-0.000809
6902	-0.00114
6903	-0.00118
6904	-0.001196
6905	-0.000838
6906	-0.000609
6907	-0.000801
6908	-0.00116
6909	-0.001012
6910	-0.00065
6911	-0.000413
6912	-0.000624
6913	-0.000592
6914	-8.2e-05
6915	0.000109
6916	-0.000537
6917	-0.000887
6918	-0.00098
6919	-0.000685
6920	-0.000651
6921	-0.000247
6922	-0.000118
6923	-0.000455
6924	-0.000427
6925	-0.000511
6926	-0.000575
6927	-0.000816
6928	-0.001022
6929	-0.001194
6930	-0.000733
6931	-0.0005
6932	-0.000574
6933	-0.000644
6934	-0.001128
6935	-0.001183
6936	-0.001273
6937	-0.001066
6938	-0.000476
6939	-0.000405
6940	-0.000901
6941	-0.000533
6942	-6.3e-05
6943	-3.9e-05
6944	-0.000773
6945	-0.001281
6946	-0.001092
6947	-0.001054
6948	-0.000519
6949	-0.000294
6950	-0.000756
6951	-0.0008
6952	-0.001151
6953	-0.001458
6954	-0.001012
6955	-0.000856
6956	-0.000535
6957	-0.000488
6958	-0.000678
6959	-0.000813
6960	-0.000997
6961	-0.001168
6962	-0.001323
6963	-0.001268
6964	-0.000766
6965	-0.000271
6966	-0.00056
6967	-0.0006
6968	-0.00086
6969	-0.000823
6970	-0.000829
6971	-0.000868
6972	-0.000962
6973	-0.000868
6974	-0.00075
6975	-0.000715
6976	-0.000615
6977	-0.000562
6978	-0.000444
6979	-0.000591
6980	-0.000673
6981	-0.000768
6982	-0.000536
6983	-0.000672
6984	-0.000797
6985	-0.000515
6986	-0.000286
6987	-0.000347
6988	-0.000195
6989	3e-06
6990	-0.000625
6991	-0.000989
6992	-0.001035
6993	-0.000909
6994	-0.00084
6995	-0.001038
6996	-0.000747
6997	-0.000742
6998	-0.000843
6999	-0.000873
7000	-0.000826
7001	-0.000491
7002	-0.000163
7003	-0.000356
7004	-0.000629
7005	-0.000799
7006	-0.000734
7007	-0.00078
7008	-0.000883
7009	-0.000756
7010	-0.00094
7011	-0.000933
7012	-0.00045
7013	-0.000599
7014	-0.001308
7015	-0.001394
7016	-0.000617
7017	-0.000461
7018	-0.000338
7019	-0.000285
7020	-0.000188
7021	-0.000508
7022	-0.000662
7023	-0.000816
7024	-0.000964
7025	-0.001078
7026	-0.001375
7027	-0.001284
7028	-0.000952
7029	-0.000623
7030	-0.000688
7031	-0.0008
7032	-0.000685
7033	-0.000472
7034	-0.000454
7035	-0.000882
7036	-0.001088
7037	-0.001026
7038	-0.000595
7039	-0.00064
7040	-0.001117
7041	-0.00125
7042	-0.000901
7043	-0.000609
7044	-0.000752
7045	-0.000841
7046	-0.000848
7047	-0.001046
7048	-0.00077
7049	-0.000662
7050	-0.000605
7051	-0.000664
7052	-0.000675
7053	-0.000932
7054	-0.000971
7055	-0.000779
7056	-0.001144
7057	-0.001149
7058	-0.000819
7059	-0.000881
7060	-0.000758
7061	-0.000733
7062	-0.000914
7063	-0.000918
7064	-0.001082
7065	-0.000407
7066	-0.000588
7067	-0.000831
7068	-0.0012
7069	-0.001035
7070	-0.00111
7071	-0.001149
7072	-0.001196
7073	-0.001185
7074	-0.000858
7075	-0.000522
7076	-0.000599
7077	-0.001004
7078	-0.001271
7079	-0.00056
7080	0.000436
7081	-0.000202
7082	-0.000765
7083	-0.001118
7084	-0.000745
7085	-0.000918
7086	-0.000799
7087	-0.00082
7088	-0.000622
7089	-0.000653
7090	-0.000792
7091	-0.000963
7092	-0.001355
7093	-0.001361
7094	-0.001325
7095	-0.001257
7096	-0.000952
7097	-0.000589
7098	-0.00062
7099	-0.000692
7100	-0.000714
7101	-0.000498
7102	-0.000256
7103	-0.000204
7104	-0.000255
7105	-0.000555
7106	-0.000896
7107	-0.000825
7108	-0.000725
7109	-0.000651
7110	-0.001264
7111	-0.001186
7112	-0.001018
7113	-0.001076
7114	-0.000759
7115	-0.000595
7116	-0.000538
7117	-0.000985
7118	-0.000754
7119	-0.000499
7120	-0.000468
7121	-0.000546
7122	-0.000711
7123	-0.000682
7124	-0.000809
7125	-0.000769
7126	-0.000785
7127	-0.00092
7128	-0.00101
7129	-0.001058
7130	-0.001233
7131	-0.001308
7132	-0.001041
7133	-0.000778
7134	-0.000675
7135	-0.000892
7136	-0.000879
7137	-0.000754
7138	-0.000722
7139	-0.000486
7140	-0.000388
7141	-0.000427
7142	-0.001218
7143	-0.001606
7144	-0.00146
7145	-0.001131
7146	-0.000668
7147	-0.000923
7148	-0.001361
7149	-0.001363
7150	-0.000907
7151	-0.00034
7152	-0.000577
7153	-0.001063
7154	-0.001233
7155	-0.000715
7156	-2.8e-05
7157	-0.000133
7158	-0.000335
7159	-0.000311
7160	-0.000461
7161	-0.000495
7162	-0.000793
7163	-0.000657
7164	-0.000604
7165	-0.000765
7166	-0.000916
7167	-0.000562
7168	0.000113
7169	-0.000237
7170	-0.000444
7171	-0.00032
7172	-0.000214
7173	-0.000645
7174	-0.000996
7175	-0.000756
7176	-0.000603
7177	-0.000803
7178	-0.000983
7179	-0.00079
7180	-0.000488
7181	-0.000736
7182	-0.00078
7183	-0.00048
7184	-0.000389
7185	-0.000605
7186	-0.000865
7187	-0.001366
7188	-0.001404
7189	-0.00134
7190	-0.000815
7191	-0.000829
7192	-0.000632
7193	-0.000648
7194	-0.00066
7195	-0.000891
7196	-0.001332
7197	-0.001141
7198	-0.000529
7199	-0.000249
7200	-0.000266
7201	-0.000543
7202	-0.000662
7203	-0.000467
7204	-0.001097
7205	-0.001424
7206	-0.001178
7207	-0.001163
7208	-0.000659
7209	-0.000624
7210	-0.000677
7211	-0.000755
7212	-0.000667
7213	-0.000634
7214	-0.000751
7215	-0.00068
7216	-0.00058
7217	-0.00016
7218	-0.000518
7219	-0.000591
7220	-0.000924
7221	-0.000429
7222	-0.000387
7223	-0.000484
7224	-0.000509
7225	-0.000333
7226	-0.000315
7227	-0.000446
7228	-0.000626
7229	-0.000653
7230	-0.000247
7231	-0.000219
7232	-0.000603
7233	-0.000936
7234	-0.001023
7235	-0.001002
7236	-0.000756
7237	-0.000319
7238	-0.000161
7239	-0.000649
7240	-0.000751
7241	-0.0006
7242	-0.000604
7243	-0.000385
7244	-0.000399
7245	-0.00048
7246	-0.000551
7247	-0.000735
7248	-0.000636
7249	-0.000757
7250	-0.001101
7251	-0.001148
7252	-0.001066
7253	-0.001122
7254	-0.001077
7255	-0.00093
7256	-0.000773
7257	-0.000822
7258	-0.000346
7259	1.3e-05
7260	-0.000137
7261	-0.00053
7262	-0.000691
7263	-0.00103
7264	-0.000738
7265	-0.000692
7266	-0.000474
7267	-0.000862
7268	-0.000808
7269	-0.000495
7270	-0.000624
7271	-0.0007
7272	-0.000731
7273	-0.00057
7274	-0.000289
7275	-0.000269
7276	-0.000795
7277	-0.001108
7278	-0.001257
7279	-0.001105
7280	-0.001069
7281	-0.001276
7282	-0.001285
7283	-0.001348
7284	-0.00112
7285	-0.001103
7286	-0.000731
7287	-0.000532
7288	-0.000461
7289	-0.000671
7290	-0.000451
7291	-0.000442
7292	-0.000811
7293	-0.000822
7294	-0.000482
7295	-8.8e-05
7296	8.8e-05
7297	-0.000349
7298	-0.000926
7299	-0.000924
7300	-0.000497
7301	-0.000541
7302	-0.000614
7303	-0.000779
7304	-0.000952
7305	-0.001041
7306	-0.000709
7307	-0.000709
7308	-0.000938
7309	-0.001043
7310	-0.000846
7311	-0.001156
7312	-0.001154
7313	-0.00094
7314	-0.000612
7315	-0.00055
7316	-0.000798
7317	-0.000916
7318	-0.000797
7319	-0.000783
7320	-0.000968
7321	-0.000911
7322	-0.000616
7323	-0.00059
7324	-0.000992
7325	-0.00127
7326	-0.001387
7327	-0.000914
7328	-0.000545
7329	-0.000807
7330	-0.001052
7331	-0.000692
7332	-0.00069
7333	-0.000651
7334	-0.000824
7335	-0.000688
7336	-0.000879
7337	-0.000969
7338	-0.001162
7339	-0.001016
7340	-0.000787
7341	-0.000744
7342	-0.000564
7343	-0.000525
7344	-0.000607
7345	-0.000755
7346	-0.000552
7347	-0.000657
7348	-0.000964
7349	-0.00107
7350	-0.001068
7351	-0.000572
7352	-0.000918
7353	-0.001337
7354	-0.00157
7355	-0.001327
7356	-0.001308
7357	-0.001002
7358	-0.000432
7359	-0.000298
7360	-0.000255
7361	-0.000435
7362	-0.000785
7363	-0.000974
7364	-0.000671
7365	-0.000598
7366	-0.000725
7367	-0.000982
7368	-0.000958
7369	-0.000686
7370	-0.000293
7371	-0.000217
7372	-0.000555
7373	-0.000506
7374	-0.000441
7375	-0.000397
7376	-0.000581
7377	-0.000779
7378	-0.000926
7379	-0.000611
7380	-0.000467
7381	-0.000304
7382	-0.000432
7383	-0.000454
7384	-0.000181
7385	-0.000417
7386	-0.00095
7387	-0.000543
7388	-0.000284
7389	-0.000556
7390	-0.000669
7391	-0.000793
7392	-0.000417
7393	4.3e-05
7394	-0.000255
7395	-0.000841
7396	-0.000477
7397	-0.000578
7398	-0.001099
7399	-0.001158
7400	-0.001282
7401	-0.00156
7402	-0.001648
7403	-0.001313
7404	-0.00077
7405	-0.000625
7406	-0.000566
7407	-0.000633
7408	-0.000532
7409	-0.000697
7410	-0.001001
7411	-0.000912
7412	-0.000612
7413	-0.000609
7414	-0.000658
7415	-0.001063
7416	-0.000953
7417	-0.00094
7418	-0.000572
7419	-0.000387
7420	-0.000684
7421	-0.000998
7422	-0.001201
7423	-0.00142
7424	-0.000835
7425	-0.00086
7426	-0.000739
7427	-0.000268
7428	-0.000366
7429	-0.000184
7430	-0.000278
7431	-0.000389
7432	-0.000641
7433	-0.000936
7434	-0.000928
7435	-0.000641
7436	-0.000577
7437	-0.001071
7438	-0.000912
7439	-0.000368
7440	-0.000337
7441	-0.000758
7442	-0.001547
7443	-0.000946
7444	-0.000591
7445	-0.000879
7446	-0.000811
7447	-0.000929
7448	-0.001173
7449	-0.000861
7450	-0.000295
7451	-0.000476
7452	-0.000551
7453	-0.000755
7454	-0.000512
7455	-0.000313
7456	-0.000538
7457	-0.001213
7458	-0.000882
7459	-0.000812
7460	-0.000586
7461	-0.000913
7462	-0.00082
7463	-0.00058
7464	-0.000824
7465	-0.000798
7466	-0.000585
7467	-0.000602
7468	-0.000804
7469	-0.000782
7470	-0.000367
7471	-0.000142
7472	-0.000216
7473	-0.000549
7474	-0.000704
7475	-0.000671
7476	-0.000795
7477	-0.000769
7478	-0.000942
7479	-0.000966
7480	-0.000707
7481	-0.00042
7482	-0.000632
7483	-0.000554
7484	-0.000272
7485	-0.00027
7486	-0.00021
7487	-0.000389
7488	-0.000521
7489	-0.000467
7490	-0.000751
7491	-0.000999
7492	-0.001151
7493	-0.001114
7494	-0.001064
7495	-0.000658
7496	-0.000598
7497	-0.000566
7498	-0.000701
7499	-0.000946
7500	-0.000952
7501	-0.000853
7502	-0.000823
7503	-0.000897
7504	-0.001161
7505	-0.000894
7506	-0.00067
7507	-0.000475
7508	-0.000356
7509	-0.000269
7510	-0.000341
7511	7.3e-05
7512	0.000172
7513	-0.000272
7514	-0.000465
7515	-0.000584
7516	-0.000945
7517	-0.00105
7518	-0.00032
7519	-0.000348
7520	-0.000725
7521	-0.000843
7522	-0.000672
7523	-0.000102
7524	-0.000218
7525	-0.000721
7526	-0.000984
7527	-0.000737
7528	-0.000403
7529	-0.000459
7530	-0.000114
7531	-0.000344
7532	-0.000751
7533	-0.000846
7534	-0.000535
7535	-5.5e-05
7536	-0.000182
7537	-0.000681
7538	-0.000931
7539	-0.000691
7540	-0.000618
7541	-0.000721
7542	-0.000569
7543	-0.000151
7544	-0.000212
7545	-0.000821
7546	-0.001175
7547	-0.001144
7548	-0.00063
7549	-0.000735
7550	-0.000936
7551	-0.000829
7552	-0.000808
7553	-0.000552
7554	-0.000703
7555	-0.000787
7556	-0.000614
7557	-0.0005
7558	-0.000953
7559	-0.00088
7560	-0.000514
7561	-0.000335
7562	-0.000261
7563	-0.000471
7564	-0.000811
7565	-0.000913
7566	-0.000903
7567	-0.000862
7568	-0.000894
7569	-0.001066
7570	-0.00112
7571	-0.000877
7572	-0.000703
7573	-0.000452
7574	-0.000124
7575	-0.000355
7576	-0.000695
7577	-0.000825
7578	-0.000416
7579	-0.000315
7580	-0.000589
7581	-0.000874
7582	-0.000853
7583	-0.000926
7584	-0.000619
7585	-0.000232
7586	-0.000348
7587	-0.000889
7588	-0.000987
7589	-0.000896
7590	-0.001003
7591	-0.00098
7592	-0.001054
7593	-0.001088
7594	-0.001114
7595	-0.000683
7596	-0.000529
7597	-0.000691
7598	-0.001085
7599	-0.00092
7600	-0.00053
7601	-0.00054
7602	-0.000907
7603	-0.00068
7604	-0.000481
7605	-0.000663
7606	-0.000961
7607	-0.000833
7608	-0.000485
7609	-0.000613
7610	-0.000548
7611	-0.000153
7612	-0.000269
7613	-0.000645
7614	-0.000673
7615	-0.000438
7616	-0.000213
7617	-0.000457
7618	-0.000581
7619	-0.000935
7620	-0.000591
7621	-0.000505
7622	-0.001053
7623	-0.000631
7624	-0.000444
7625	-0.000519
7626	-0.000685
7627	-0.000692
7628	-0.000366
7629	-0.000265
7630	-0.00084
7631	-0.000928
7632	-0.000546
7633	-0.000674
7634	-0.001024
7635	-0.000923
7636	-0.000852
7637	-0.000591
7638	-0.000353
7639	-0.00036
7640	-0.000242
7641	-0.000454
7642	-0.000631
7643	-0.000591
7644	-0.000487
7645	-0.000482
7646	-0.000193
7647	-0.000406
7648	-0.000858
7649	-0.00092
7650	-0.000573
7651	-2.6e-05
7652	-0.000253
7653	-0.000583
7654	-0.000623
7655	-0.000486
7656	-0.000609
7657	-0.000975
7658	-0.001055
7659	-0.000631
7660	1.4e-05
7661	-6.9e-05
7662	-0.000338
7663	-0.000727
7664	-0.001112
7665	-0.001315
7666	-0.00101
7667	-0.000771
7668	-0.00097
7669	-0.001083
7670	-0.001206
7671	-0.001299
7672	-0.000941
7673	-0.000539
7674	-0.000317
7675	-0.000859
7676	-0.000756
7677	-0.000652
7678	-0.000674
7679	-0.000695
7680	-0.0006
7681	-0.000538
7682	-0.000593
7683	-0.000416
7684	-0.000406
7685	-0.000313
7686	-0.000618
7687	-0.000814
7688	-0.000342
7689	-0.000386
7690	-0.000701
7691	-0.00096
7692	-0.001005
7693	-0.001051
7694	-0.00089
7695	-0.000488
7696	-0.000379
7697	-0.000374
7698	-0.000665
7699	-0.000433
7700	-0.000331
7701	2.2e-05
7702	-0.000392
7703	-0.000376
7704	-0.000221
7705	-8.5e-05
7706	-0.000233
7707	-0.000459
7708	-0.000244
7709	-0.000231
7710	-0.000176
7711	-0.000323
7712	-0.000295
7713	-0.000353
7714	-0.000706
7715	-0.00086
7716	-0.000799
7717	-0.000841
7718	-0.001131
7719	-0.00124
7720	-0.001081
7721	-0.000794
7722	-0.000372
7723	-0.000499
7724	-0.000476
7725	-0.000411
7726	-0.000555
7727	-0.000877
7728	-0.000918
7729	-0.000599
7730	-0.000473
7731	-0.000479
7732	-0.000358
7733	-0.000408
7734	-0.000374
7735	-0.000423
7736	-0.000493
7737	-0.000452
7738	-0.000433
7739	-0.00055
7740	-0.001011
7741	-0.001093
7742	-0.001259
7743	-0.001082
7744	-0.000735
7745	-0.000636
7746	-0.000639
7747	-0.000491
7748	-0.000665
7749	-0.000916
7750	-0.000958
7751	-0.000764
7752	-0.000593
7753	-0.000678
7754	-0.000961
7755	-0.000642
7756	-0.000259
7757	-0.00022
7758	-0.000315
7759	-0.000291
7760	-0.000654
7761	-0.000751
7762	-0.000847
7763	-0.001011
7764	-0.000919
7765	-0.000987
7766	-0.001004
7767	-0.000629
7768	-0.000612
7769	-0.000298
7770	-0.000126
7771	-0.000442
7772	-0.001016
7773	-0.001021
7774	-0.001014
7775	-0.000979
7776	-0.000636
7777	-0.000632
7778	-0.000844
7779	-0.000743
7780	-0.000761
7781	-0.000885
7782	-0.000949
7783	-0.000668
7784	-0.000811
7785	-0.000629
7786	-0.000177
7787	-0.000254
7788	-0.000702
7789	-0.000924
7790	-0.000455
7791	-0.000808
7792	-0.001229
7793	-0.001316
7794	-0.001547
7795	-0.001045
7796	-0.000778
7797	-0.000501
7798	-0.00075
7799	-0.000645
7800	-0.00102
7801	-0.001143
7802	-0.001064
7803	-0.001128
7804	-0.000971
7805	-0.00053
7806	-0.0004
7807	-0.000453
7808	-0.000294
7809	-0.0004
7810	-0.000515
7811	-0.000766
7812	-0.001035
7813	-0.001165
7814	-0.001608
7815	-0.001664
7816	-0.001255
7817	-0.000985
7818	-0.000512
7819	-0.000497
7820	-0.000551
7821	-0.00087
7822	-0.00083
7823	-0.000743
7824	-0.001038
7825	-0.000813
7826	-0.000525
7827	-0.000771
7828	-0.000964
7829	-0.000841
7830	-0.000559
7831	-0.000418
7832	-0.000268
7833	-0.000285
7834	-0.000513
7835	-0.000948
7836	-0.000888
7837	-0.000885
7838	-0.000804
7839	-0.000512
7840	-0.000105
7841	-0.000122
7842	-0.000367
7843	2.3e-05
7844	-0.000179
7845	-0.000631
7846	-0.000735
7847	-0.000759
7848	-0.000714
7849	-0.000744
7850	-0.000909
7851	-0.00114
7852	-0.000916
7853	-0.000652
7854	-0.000449
7855	-0.000346
7856	-0.000463
7857	-0.000246
7858	-0.000295
7859	-0.000442
7860	-0.000629
7861	-0.00048
7862	-0.000503
7863	-0.000981
7864	-0.001187
7865	-0.000689
7866	-0.00014
7867	-0.000444
7868	-0.000556
7869	-0.000769
7870	-0.000863
7871	-0.000653
7872	-0.000196
7873	-0.000542
7874	-0.000661
7875	-0.000795
7876	-0.000826
7877	-0.000948
7878	-0.001143
7879	-0.001208
7880	-0.000449
7881	-0.000389
7882	-0.000662
7883	-0.00111
7884	-0.001008
7885	-0.000845
7886	-0.000656
7887	-0.000476
7888	-0.000674
7889	-0.000583
7890	-0.000465
7891	-0.000861
7892	-0.000948
7893	-0.000572
7894	-0.000515
7895	-0.000355
7896	-0.00043
7897	-0.000385
7898	-0.000754
7899	-0.000862
7900	-0.000913
7901	-0.000575
7902	-0.000504
7903	-0.000369
7904	-0.000516
7905	-0.001099
7906	-0.000756
7907	-0.000465
7908	-0.000649
7909	-0.000994
7910	-0.001192
7911	-0.001376
7912	-0.001059
7913	-0.001028
7914	-0.000702
7915	-0.000754
7916	-0.000847
7917	-0.000928
7918	-0.001015
7919	-0.001004
7920	-0.00116
7921	-0.001271
7922	-0.00087
7923	-0.000675
7924	-0.000913
7925	-0.000862
7926	-0.000281
7927	-0.000425
7928	-0.000666
7929	0.000247
7930	0.000447
7931	0.000252
7932	-0.000246
7933	-0.00077
7934	-0.001131
7935	-0.000702
7936	-0.000827
7937	-0.001168
7938	-0.00104
7939	-0.000526
7940	-0.000214
7941	-0.000493
7942	-0.001056
7943	-0.001352
7944	-0.001114
7945	-0.000858
7946	-0.000339
7947	-0.000118
7948	-9.4e-05
7949	-0.000526
7950	-0.000634
7951	-0.000709
7952	-0.000779
7953	-0.000852
7954	-0.000988
7955	-0.000532
7956	-7.8e-05
7957	-0.000234
7958	-0.000147
7959	0.000458
7960	0.000383
7961	-0.000484
7962	-0.000977
7963	-0.000908
7964	-0.000887
7965	-0.000803
7966	-0.000925
7967	-0.001218
7968	-0.000796
7969	-0.000755
7970	-0.000719
7971	-0.000946
7972	-0.000801
7973	-0.000814
7974	-0.001007
7975	-0.000878
7976	-0.000743
7977	-0.000849
7978	-0.001002
7979	-0.001044
7980	-0.001032
7981	-0.000779
7982	-0.000761
7983	-0.000528
7984	-0.000735
7985	-0.000913
7986	-0.000958
7987	-0.000723
7988	-0.00064
7989	-0.000367
7990	-0.00018
7991	-0.000424
7992	-0.000621
7993	-0.000548
7994	-0.000336
7995	-0.000489
7996	-0.000806
7997	-0.000798
7998	-0.000623
[truncated: 4,001 more rows]

## Sheet: WT Replicate 3
Time	UV
6000	-0.002648
6001	-0.002666
6002	-0.002702
6003	-0.002944
6004	-0.00313
6005	-0.003215
6006	-0.002939
6007	-0.002862
6008	-0.002591
6009	-0.0027
6010	-0.003222
6011	-0.003327
6012	-0.003228
6013	-0.003074
6014	-0.002952
6015	-0.00279
6016	-0.002615
6017	-0.002747
6018	-0.00299
6019	-0.003079
6020	-0.003262
6021	-0.003211
6022	-0.0029
6023	-0.003033
6024	-0.002804
6025	-0.00248
6026	-0.002592
6027	-0.002985
6028	-0.00295
6029	-0.00303
6030	-0.00313
6031	-0.003017
6032	-0.00294
6033	-0.002898
6034	-0.002692
6035	-0.002659
6036	-0.002568
6037	-0.002372
6038	-0.0026
6039	-0.003117
6040	-0.003562
6041	-0.003262
6042	-0.002689
6043	-0.002846
6044	-0.002855
6045	-0.003007
6046	-0.002618
6047	-0.002413
6048	-0.002576
6049	-0.002806
6050	-0.002871
6051	-0.002336
6052	-0.002281
6053	-0.002589
6054	-0.002493
6055	-0.002752
6056	-0.002839
6057	-0.003254
6058	-0.003376
6059	-0.002902
6060	-0.002838
6061	-0.003264
6062	-0.003379
6063	-0.003479
6064	-0.003187
6065	-0.002758
6066	-0.002498
6067	-0.002477
6068	-0.002821
6069	-0.003289
6070	-0.003588
6071	-0.00356
6072	-0.003352
6073	-0.003055
6074	-0.0029
6075	-0.002755
6076	-0.00255
6077	-0.002753
6078	-0.003134
6079	-0.00304
6080	-0.003171
6081	-0.002638
6082	-0.002279
6083	-0.002384
6084	-0.002634
6085	-0.002834
6086	-0.002729
6087	-0.002698
6088	-0.003252
6089	-0.003055
6090	-0.002856
6091	-0.002613
6092	-0.002725
6093	-0.002663
6094	-0.002589
6095	-0.00278
6096	-0.003131
6097	-0.003194
6098	-0.003177
6099	-0.003396
6100	-0.003548
6101	-0.003707
6102	-0.003405
6103	-0.002772
6104	-0.002679
6105	-0.002838
6106	-0.003087
6107	-0.002927
6108	-0.002627
6109	-0.002337
6110	-0.002559
6111	-0.002696
6112	-0.003113
6113	-0.003669
6114	-0.003691
6115	-0.003457
6116	-0.00282
6117	-0.003108
6118	-0.003036
6119	-0.003143
6120	-0.003164
6121	-0.002916
6122	-0.002758
6123	-0.00255
6124	-0.002024
6125	-0.002011
6126	-0.002448
6127	-0.002826
6128	-0.002987
6129	-0.002664
6130	-0.002666
6131	-0.003125
6132	-0.003573
6133	-0.002956
6134	-0.002331
6135	-0.002071
6136	-0.00232
6137	-0.002514
6138	-0.002917
6139	-0.003331
6140	-0.003167
6141	-0.002905
6142	-0.002899
6143	-0.003183
6144	-0.003118
6145	-0.003185
6146	-0.003038
6147	-0.002797
6148	-0.002922
6149	-0.00279
6150	-0.002946
6151	-0.003179
6152	-0.003292
6153	-0.003109
6154	-0.002646
6155	-0.002607
6156	-0.002501
6157	-0.002127
6158	-0.00256
6159	-0.003379
6160	-0.002789
6161	-0.002233
6162	-0.002498
6163	-0.002753
6164	-0.002929
6165	-0.002896
6166	-0.002996
6167	-0.002907
6168	-0.002576
6169	-0.002775
6170	-0.002554
6171	-0.002359
6172	-0.002333
6173	-0.00249
6174	-0.002503
6175	-0.002626
6176	-0.002767
6177	-0.00281
6178	-0.003207
6179	-0.002962
6180	-0.002914
6181	-0.002796
6182	-0.003059
6183	-0.002869
6184	-0.002788
6185	-0.002581
6186	-0.002569
6187	-0.002813
6188	-0.003203
6189	-0.003283
6190	-0.003035
6191	-0.002963
6192	-0.002824
6193	-0.002844
6194	-0.002816
6195	-0.002772
6196	-0.002725
6197	-0.002653
6198	-0.003048
6199	-0.002891
6200	-0.002747
6201	-0.00253
6202	-0.002726
6203	-0.002549
6204	-0.002906
6205	-0.003202
6206	-0.003377
6207	-0.003708
6208	-0.003504
6209	-0.003652
6210	-0.003397
6211	-0.003014
6212	-0.003257
6213	-0.003643
6214	-0.003028
6215	-0.002482
6216	-0.002932
6217	-0.003006
6218	-0.00304
6219	-0.003076
6220	-0.003066
6221	-0.003305
6222	-0.003348
6223	-0.00348
6224	-0.003142
6225	-0.003158
6226	-0.003359
6227	-0.002884
6228	-0.002222
6229	-0.002087
6230	-0.002446
6231	-0.002602
6232	-0.003306
6233	-0.003606
6234	-0.003492
6235	-0.003622
6236	-0.003449
6237	-0.003266
6238	0
6239	0.000203
6240	0.001433
6241	0.002458
6242	0.002594
6243	0.003146
6244	0.003868
6245	0.003622
6246	0.003154
6247	0.00309
6248	0.002712
6249	0.002789
6250	0.003148
6251	0.00348
6252	0.003407
6253	0.003043
6254	0.002947
6255	0.002948
6256	0.002813
6257	0.00268
6258	0.002661
6259	0.003034
6260	0.00278
6261	0.002412
6262	0.003124
6263	0.00357
6264	0.003385
6265	0.003537
6266	0.003562
6267	0.003341
6268	0.003092
6269	0.002945
6270	0.002949
6271	0.003641
6272	0.003641
6273	0.002805
6274	0.002789
6275	0.003061
6276	0.003519
6277	0.004032
6278	0.003947
6279	0.003115
6280	0.00276
6281	0.002501
6282	0.002733
6283	0.002823
6284	0.002832
6285	0.002813
6286	0.002711
6287	0.002523
6288	0.002715
6289	0.003111
6290	0.003354
6291	0.003408
6292	0.003139
6293	0.003213
6294	0.003216
6295	0.003385
6296	0.003748
6297	0.003817
6298	0.003641
6299	0.003496
6300	0.003731
6301	0.003495
6302	0.003765
6303	0.003768
6304	0.004127
6305	0.003943
6306	0.003781
6307	0.003365
6308	0.003564
6309	0.003655
6310	0.003826
6311	0.003928
6312	0.003756
6313	0.003658
6314	0.003556
6315	0.003536
6316	0.004017
6317	0.004797
6318	0.004069
6319	0.003877
6320	0.003946
6321	0.004087
6322	0.003659
6323	0.003615
6324	0.003929
6325	0.004176
6326	0.003898
6327	0.003485
6328	0.003765
6329	0.00449
6330	0.004956
6331	0.005029
6332	0.004779
6333	0.003842
6334	0.003863
6335	0.003907
6336	0.003968
6337	0.003502
6338	0.003026
6339	0.003367
6340	0.00379
6341	0.003671
6342	0.003334
6343	0.003391
6344	0.003523
6345	0.003406
6346	0.003425
6347	0.003054
6348	0.002807
6349	0.003276
6350	0.003341
6351	0.00368
6352	0.00358
6353	0.003696
6354	0.003508
6355	0.003146
6356	0.003592
6357	0.003649
6358	0.003561
6359	0.003646
6360	0.003668
6361	0.003357
6362	0.003839
6363	0.004141
6364	0.003612
6365	0.00296
6366	0.002567
6367	0.002616
6368	0.002983
6369	0.003326
6370	0.003822
6371	0.003408
6372	0.003044
6373	0.003462
6374	0.004017
6375	0.003739
6376	0.003841
6377	0.003942
6378	0.004147
6379	0.003575
6380	0.003403
6381	0.003115
6382	0.003095
6383	0.00304
6384	0.00285
6385	0.003043
6386	0.003598
6387	0.003686
6388	0.003505
6389	0.003564
6390	0.003597
6391	0.003502
6392	0.003791
6393	0.003474
6394	0.003494
6395	0.003488
6396	0.003348
6397	0.003406
6398	0.003144
6399	0.003116
6400	0.003315
6401	0.003586
6402	0.003382
6403	0.003094
6404	0.003241
6405	0.003526
6406	0.003449
6407	0.003449
6408	0.003243
6409	0.003261
6410	0.003228
6411	0.00348
6412	0.003875
6413	0.003625
6414	0.003626
6415	0.003087
6416	0.002353
6417	0.002769
6418	0.003517
6419	0.003713
6420	0.003345
6421	0.003477
6422	0.003536
6423	0.003482
6424	0.00365
6425	0.003736
6426	0.00317
6427	0.002703
6428	0.002866
6429	0.002939
6430	0.003306
6431	0.00349
6432	0.003343
6433	0.002686
6434	0.003098
6435	0.003371
6436	0.003394
6437	0.003241
6438	0.003107
6439	0.002908
6440	0.003179
6441	0.003175
6442	0.003115
6443	0.003092
6444	0.003261
6445	0.003165
6446	0.003197
6447	0.003234
6448	0.00358
6449	0.003928
6450	0.003701
6451	0.003547
6452	0.003309
6453	0.003395
6454	0.003476
6455	0.003592
6456	0.003574
6457	0.003619
6458	0.003371
6459	0.003075
6460	0.003217
6461	0.003813
6462	0.00363
6463	0.003178
6464	0.002852
6465	0.00276
6466	0.00308
6467	0.003257
6468	0.003382
6469	0.002915
6470	0.003821
6471	0.004305
6472	0.003949
6473	0.003954
6474	0.003651
6475	0.002959
6476	0.002976
6477	0.003426
6478	0.004029
6479	0.003621
6480	0.002887
6481	0.002814
6482	0.002663
6483	0.002831
6484	0.003298
6485	0.003232
6486	0.003213
6487	0.003376
6488	0.00348
6489	0.003461
6490	0.003531
6491	0.003256
6492	0.002731
6493	0.002874
6494	0.003452
6495	0.003531
6496	0.003453
6497	0.003093
6498	0.003174
6499	0.003283
6500	0.00324
6501	0.003044
6502	0.003547
6503	0.0032
6504	0.003168
6505	0.00329
6506	0.003276
6507	0.002766
6508	0.002542
6509	0.002945
6510	0.003315
6511	0.003493
6512	0.003318
6513	0.003189
6514	0.003537
6515	0.003377
6516	0.00291
6517	0.002658
6518	0.002743
6519	0.002823
6520	0.003152
6521	0.003224
6522	0.003237
6523	0.003504
6524	0.003151
6525	0.002672
6526	0.002889
6527	0.003464
6528	0.0035
6529	0.002773
6530	0.002381
6531	0.003334
6532	0.003711
6533	0.00352
6534	0.003043
6535	0.003112
6536	0.003379
6537	0.00378
6538	0.003949
6539	0.00408
6540	0.003369
6541	0.003265
6542	0.00353
6543	0.00315
6544	0.002894
6545	0.002674
6546	0.003159
6547	0.003718
6548	0.003473
6549	0.003347
6550	0.003
6551	0.002969
6552	0.002995
6553	0.003089
6554	0.002547
6555	0.002807
6556	0.003535
6557	0.003802
6558	0.003997
6559	0.003569
6560	0.003122
6561	0.002972
6562	0.002848
6563	0.003262
6564	0.003478
6565	0.003437
6566	0.003381
6567	0.003061
6568	0.003053
6569	0.003037
6570	0.003044
6571	0.003146
6572	0.00301
6573	0.003078
6574	0.002818
6575	0.002638
6576	0.002434
6577	0.002813
6578	0.002828
6579	0.002644
6580	0.003381
6581	0.003353
6582	0.002998
6583	0.002689
6584	0.002577
6585	0.003025
6586	0.003352
6587	0.003316
6588	0.003455
6589	0.003559
6590	0.003587
6591	0.003294
6592	0.002842
6593	0.002833
6594	0.003349
6595	0.003625
6596	0.003181
6597	0.003118
6598	0.003046
6599	0.003216
6600	0.002798
6601	0.002603
6602	0.00269
6603	0.002901
6604	0.002829
6605	0.003072
6606	0.003181
6607	0.00346
6608	0.003038
6609	0.002732
6610	0.002883
6611	0.003294
6612	0.003284
6613	0.002994
6614	0.002947
6615	0.002961
6616	0.003101
6617	0.002722
6618	0.002721
6619	0.002696
6620	0.002977
6621	0.003031
6622	0.002841
6623	0.002586
6624	0.003184
6625	0.003296
6626	0.003238
6627	0.003431
6628	0.00387
6629	0.003773
6630	0.003644
6631	0.003535
6632	0.003604
6633	0.003101
6634	0.003248
6635	0.003269
6636	0.003152
6637	0.003475
6638	0.003166
6639	0.002814
6640	0.003087
6641	0.003544
6642	0.00387
6643	0.003901
6644	0.00334
6645	0.002976
6646	0.002445
6647	0.00274
6648	0.002949
6649	0.003248
6650	0.003277
6651	0.003349
6652	0.002818
6653	0.00294
6654	0.003176
6655	0.003662
6656	0.003642
6657	0.003313
6658	0.003074
6659	0.003188
6660	0.003218
6661	0.003731
6662	0.003879
6663	0.003751
6664	0.003159
6665	0.003334
6666	0.003328
6667	0.00317
6668	0.00301
6669	0.003577
6670	0.003585
6671	0.003294
6672	0.002785
6673	0.002554
6674	0.002554
6675	0.002872
6676	0.00315
6677	0.003281
6678	0.003092
6679	0.002996
6680	0.00322
6681	0.003113
6682	0.002916
6683	0.002733
6684	0.003004
6685	0.00328
6686	0.003271
6687	0.003519
6688	0.00343
6689	0.003136
6690	0.003147
6691	0.002853
6692	0.002579
6693	0.002681
6694	0.003129
6695	0.003293
6696	0.003589
6697	0.003136
6698	0.002695
6699	0.00246
6700	0.002722
6701	0.002949
6702	0.002898
6703	0.002882
6704	0.002903
6705	0.00316
6706	0.003079
6707	0.002786
6708	0.002903
6709	0.003019
6710	0.003049
6711	0.002821
6712	0.002753
6713	0.003283
6714	0.003396
6715	0.00332
6716	0.003312
6717	0.003251
6718	0.003231
6719	0.002951
6720	0.00267
6721	0.002703
6722	0.002791
6723	0.003225
6724	0.00337
6725	0.003107
6726	0.002696
6727	0.00286
6728	0.003184
6729	0.003394
6730	0.003415
6731	0.002978
6732	0.003036
6733	0.003034
6734	0.002936
6735	0.002898
6736	0.002898
6737	0.003067
6738	0.003724
6739	0.003905
6740	0.003567
6741	0.003474
6742	0.003351
6743	0.00301
6744	0.003076
6745	0.003196
6746	0.002748
6747	0.002521
6748	0.002631
6749	0.002994
6750	0.003111
6751	0.003403
6752	0.003265
6753	0.003344
6754	0.003222
6755	0.00302
6756	0.003196
6757	0.003145
6758	0.002603
6759	0.002531
6760	0.002526
6761	0.00267
6762	0.002893
6763	0.003098
6764	0.003136
6765	0.003211
6766	0.003432
6767	0.003405
6768	0.003225
6769	0.003122
6770	0.003072
6771	0.003005
6772	0.00299
6773	0.002781
6774	0.002702
6775	0.002851
6776	0.00366
6777	0.003505
6778	0.002981
6779	0.003227
6780	0.003167
6781	0.002941
6782	0.0032
6783	0.003607
6784	0.004123
6785	0.003621
6786	0.003309
6787	0.003306
6788	0.003134
6789	0.003249
6790	0.003463
6791	0.003419
6792	0.0038
6793	0.00306
6794	0.002239
6795	0.002263
6796	0.002821
6797	0.002945
6798	0.002565
6799	0.002507
6800	0.002788
6801	0.003038
6802	0.002952
6803	0.002965
6804	0.003146
6805	0.003077
6806	0.003021
6807	0.003003
6808	0.00307
6809	0.003065
6810	0.003285
6811	0.003775
6812	0.003562
6813	0.003077
6814	0.003313
6815	0.003233
6816	0.003447
6817	0.003232
6818	0.003141
6819	0.003154
6820	0.003222
6821	0.003335
6822	0.002746
6823	0.002694
6824	0.00316
6825	0.002857
6826	0.002831
6827	0.00323
6828	0.003339
6829	0.00362
6830	0.003926
6831	0.003787
6832	0.003331
6833	0.003406
6834	0.003258
6835	0.002805
6836	0.002782
6837	0.00276
6838	0.002771
6839	0.003693
6840	0.003742
6841	0.003288
6842	0.00314
6843	0.002972
6844	0.003116
6845	0.003039
6846	0.003334
6847	0.003379
6848	0.002697
6849	0.003063
6850	0.003157
6851	0.003062
6852	0.00325
6853	0.003056
6854	0.002909
6855	0.003328
6856	0.003687
6857	0.00328
6858	0.002623
6859	0.00266
6860	0.003093
6861	0.003504
6862	0.003265
6863	0.003156
6864	0.003122
6865	0.003495
6866	0.003538
6867	0.003477
6868	0.003131
6869	0.002963
6870	0.002832
6871	0.002649
6872	0.002622
6873	0.002854
6874	0.003945
6875	0.00377
6876	0.002859
6877	0.002792
6878	0.002992
6879	0.003117
6880	0.003162
6881	0.003096
6882	0.00312
6883	0.003306
6884	0.003144
6885	0.003083
6886	0.002932
6887	0.003288
6888	0.003422
6889	0.003241
6890	0.002926
6891	0.003057
6892	0.003245
6893	0.003197
6894	0.003215
6895	0.002882
6896	0.002593
6897	0.002777
6898	0.003692
6899	0.003407
6900	0.002699
6901	0.00254
6902	0.002787
6903	0.002834
6904	0.002998
6905	0.002553
6906	0.002115
6907	0.002539
6908	0.003093
6909	0.003286
6910	0.002713
6911	0.002693
6912	0.003052
6913	0.003189
6914	0.003097
6915	0.003402
6916	0.003155
6917	0.002858
6918	0.003203
6919	0.003294
6920	0.002757
6921	0.00303
6922	0.003205
6923	0.002919
6924	0.002879
6925	0.003053
6926	0.003499
6927	0.003007
6928	0.002758
6929	0.002874
6930	0.003089
6931	0.002824
6932	0.002596
6933	0.002695
6934	0.002731
6935	0.002457
6936	0.002876
6937	0.003329
6938	0.003445
6939	0.003455
6940	0.003609
6941	0.003531
6942	0.003311
6943	0.00324
6944	0.00303
6945	0.002577
6946	0.002673
6947	0.003022
6948	0.002628
6949	0.002956
6950	0.00306
6951	0.002881
6952	0.003075
6953	0.002975
6954	0.002767
6955	0.002667
6956	0.002731
6957	0.003081
6958	0.003579
6959	0.003406
6960	0.003428
6961	0.003204
6962	0.003492
6963	0.00282
6964	0.003039
6965	0.003321
6966	0.003392
6967	0.003286
6968	0.003109
6969	0.003065
6970	0.002915
6971	0.002909
6972	0.003263
6973	0.003545
6974	0.003064
6975	0.002577
6976	0.002503
6977	0.002586
6978	0.003093
6979	0.003253
6980	0.003197
6981	0.002866
6982	0.002654
6983	0.002411
6984	0.002389
6985	0.002537
6986	0.002768
6987	0.002703
6988	0.002998
6989	0.002947
6990	0.002775
6991	0.002726
6992	0.002719
6993	0.003113
6994	0.003525
6995	0.003023
6996	0.002763
6997	0.002906
6998	0.003229
6999	0.00345
7000	0.003274
7001	0.003467
7002	0.003274
7003	0.00289
7004	0.003165
7005	0.003378
7006	0.003037
7007	0.003105
7008	0.003381
7009	0.003331
7010	0.00311
7011	0.002668
7012	0.002414
7013	0.002661
7014	0.002995
7015	0.003569
7016	0.003343
7017	0.003306
7018	0.003764
7019	0.003025
7020	0.002651
7021	0.002667
7022	0.002455
7023	0.002549
7024	0.00295
7025	0.003434
7026	0.003482
7027	0.003221
7028	0.003292
7029	0.003288
7030	0.003503
7031	0.003607
7032	0.003357
7033	0.003408
7034	0.003428
7035	0.003295
7036	0.003341
7037	0.003188
7038	0.003091
7039	0.002992
7040	0.003185
7041	0.003462
7042	0.003452
7043	0.003552
7044	0.003347
7045	0.002994
7046	0.003385
7047	0.002981
7048	0.002771
7049	0.002701
7050	0.002708
7051	0.002338
7052	0.002599
7053	0.002915
7054	0.002954
7055	0.003083
7056	0.003207
7057	0.00344
7058	0.003344
7059	0.003293
7060	0.002952
7061	0.002859
7062	0.002708
7063	0.002586
7064	0.003017
7065	0.003263
7066	0.003245
7067	0.002964
7068	0.003041
7069	0.003204
7070	0.003199
7071	0.00292
7072	0.002944
7073	0.002927
7074	0.002634
7075	0.002862
7076	0.003373
7077	0.003321
7078	0.003064
7079	0.002572
7080	0.003218
7081	0.00281
7082	0.002462
7083	0.002794
7084	0.003416
7085	0.003382
7086	0.003286
7087	0.002863
7088	0.002942
7089	0.002981
7090	0.002951
7091	0.002726
7092	0.00265
7093	0.002911
7094	0.002898
7095	0.002753
7096	0.003546
7097	0.003444
7098	0.002985
7099	0.002791
7100	0.002938
7101	0.00305
7102	0.002792
7103	0.002497
7104	0.002697
7105	0.002815
7106	0.002909
7107	0.002869
7108	0.002898
7109	0.002887
7110	0.002831
7111	0.002704
7112	0.002432
7113	0.002855
7114	0.003312
7115	0.002951
7116	0.002432
7117	0.00277
7118	0.003187
7119	0.002941
7120	0.002605
7121	0.002654
7122	0.002604
7123	0.003195
7124	0.003834
7125	0.003806
7126	0.003612
7127	0.003282
7128	0.003367
7129	0.002966
7130	0.002673
7131	0.002928
7132	0.00299
7133	0.002474
7134	0.002437
7135	0.002849
7136	0.00306
7137	0.002503
7138	0.003012
7139	0.003339
7140	0.002778
7141	0.003142
7142	0.003255
7143	0.002727
7144	0.002532
7145	0.002906
7146	0.003214
7147	0.003248
7148	0.003326
7149	0.003299
7150	0.003313
7151	0.002973
7152	0.003085
7153	0.003326
7154	0.003286
7155	0.00302
7156	0.002882
7157	0.002888
7158	0.003089
7159	0.003091
7160	0.003226
7161	0.003692
7162	0.002993
7163	0.002459
7164	0.002638
7165	0.002762
7166	0.002627
7167	0.002956
7168	0.003008
7169	0.002937
7170	0.002419
7171	0.002275
7172	0.002574
7173	0.0038
7174	0.003591
7175	0.00325
7176	0.003005
7177	0.003482
7178	0.003673
7179	0.003359
7180	0.00278
7181	0.003439
7182	0.003562
7183	0.003178
7184	0.00313
7185	0.002853
7186	0.002952
7187	0.002892
7188	0.002626
7189	0.001945
7190	0.002245
7191	0.002786
7192	0.002687
7193	0.002491
7194	0.002882
7195	0.003067
7196	0.003172
7197	0.002857
7198	0.002237
7199	0.002296
7200	0.00258
7201	0.002651
7202	0.003043
7203	0.00319
7204	0.003096
7205	0.00364
7206	0.004526
7207	0.003845
7208	0.002816
7209	0.00278
7210	0.002927
7211	0.002995
7212	0.002734
7213	0.002365
7214	0.002558
7215	0.002787
7216	0.003152
7217	0.003376
7218	0.003332
7219	0.003089
7220	0.003147
7221	0.002935
7222	0.002672
7223	0.00277
7224	0.003531
7225	0.003739
7226	0.003074
7227	0.0029
7228	0.002955
7229	0.002476
7230	0.002792
7231	0.002973
7232	0.003044
7233	0.003129
7234	0.003282
7235	0.003669
7236	0.003565
7237	0.003143
7238	0.002673
7239	0.002731
7240	0.003137
7241	0.003353
7242	0.00314
7243	0.003317
7244	0.003128
7245	0.003034
7246	0.002578
7247	0.002333
7248	0.00252
7249	0.002468
7250	0.002857
7251	0.00322
7252	0.003292
7253	0.003195
7254	0.003263
7255	0.003226
7256	0.002937
7257	0.002719
7258	0.002481
7259	0.002696
7260	0.002908
7261	0.002715
7262	0.002585
7263	0.002717
7264	0.002916
7265	0.002806
7266	0.002561
7267	0.002232
7268	0.002482
7269	0.00244
7270	0.00261
7271	0.00297
7272	0.003298
7273	0.003143
7274	0.002748
7275	0.002265
7276	0.002111
7277	0.00288
7278	0.003056
7279	0.002876
7280	0.003044
7281	0.002969
7282	0.003153
7283	0.003377
7284	0.003033
7285	0.002394
7286	0.002382
7287	0.0025
7288	0.003324
7289	0.003312
7290	0.003202
7291	0.003083
7292	0.002535
7293	0.002489
7294	0.002824
7295	0.003073
7296	0.003046
7297	0.002761
7298	0.002213
7299	0.002626
7300	0.003028
7301	0.002907
7302	0.00301
7303	0.003403
7304	0.00309
7305	0.00281
7306	0.002978
7307	0.003017
7308	0.003119
7309	0.003242
7310	0.003201
7311	0.002575
7312	0.002422
7313	0.002803
7314	0.003337
7315	0.003184
7316	0.002683
7317	0.002933
7318	0.003162
7319	0.00322
7320	0.003287
7321	0.002916
7322	0.003208
7323	0.003202
7324	0.002666
7325	0.002578
7326	0.002903
7327	0.003018
7328	0.00278
7329	0.002511
7330	0.002374
7331	0.002599
7332	0.002587
7333	0.002186
7334	0.002042
7335	0.002566
7336	0.002993
7337	0.002876
7338	0.00269
7339	0.002768
7340	0.002676
7341	0.003058
7342	0.003074
7343	0.003104
7344	0.002699
7345	0.002662
7346	0.003224
7347	0.003461
7348	0.003121
7349	0.002631
7350	0.002698
7351	0.002654
7352	0.002542
7353	0.002924
7354	0.002684
7355	0.002299
7356	0.002151
7357	0.002274
7358	0.002647
7359	0.002684
7360	0.003047
7361	0.003247
7362	0.003017
7363	0.003076
7364	0.003095
7365	0.003131
7366	0.00309
7367	0.003158
7368	0.003131
7369	0.002923
7370	0.003097
7371	0.00303
7372	0.002714
7373	0.00299
7374	0.003155
7375	0.003206
7376	0.002486
7377	0.002343
7378	0.002681
7379	0.002805
7380	0.002949
7381	0.00325
7382	0.003547
7383	0.003505
7384	0.002884
7385	0.002682
7386	0.002756
7387	0.002712
7388	0.003079
7389	0.002751
7390	0.003039
7391	0.002648
7392	0.002288
7393	0.002289
7394	0.002628
7395	0.002776
7396	0.002484
7397	0.00282
7398	0.00316
7399	0.003347
7400	0.002911
7401	0.002667
7402	0.002517
7403	0.002648
7404	0.002893
7405	0.003303
7406	0.003356
7407	0.002815
7408	0.002566
7409	0.002454
7410	0.002333
7411	0.002453
7412	0.002676
7413	0.002439
7414	0.00234
7415	0.00249
7416	0.002867
7417	0.002571
7418	0.002675
7419	0.002862
7420	0.003415
7421	0.00284
7422	0.002949
7423	0.002902
7424	0.002748
7425	0.003034
7426	0.003144
7427	0.002754
7428	0.002564
7429	0.00271
7430	0.002758
7431	0.002565
7432	0.002347
7433	0.002014
7434	0.002184
7435	0.002566
7436	0.002878
7437	0.003054
7438	0.003221
7439	0.003169
7440	0.003572
7441	0.003169
7442	0.002482
7443	0.00222
7444	0.002442
7445	0.002757
7446	0.003045
7447	0.003116
7448	0.002857
7449	0.002372
7450	0.002568
7451	0.002967
7452	0.003226
7453	0.003285
7454	0.003322
7455	0.003475
7456	0.003127
7457	0.003261
7458	0.002904
7459	0.002938
7460	0.002882
7461	0.003113
7462	0.00281
7463	0.002656
7464	0.002699
7465	0.002798
7466	0.002623
7467	0.002642
7468	0.002703
7469	0.002653
7470	0.002717
7471	0.002851
7472	0.003045
7473	0.003065
7474	0.003044
7475	0.00316
7476	0.002782
7477	0.002571
7478	0.002598
7479	0.00305
7480	0.003001
7481	0.003093
7482	0.002991
7483	0.003524
7484	0.00365
7485	0.00377
7486	0.003548
7487	0.003181
7488	0.002775
7489	0.00259
7490	0.002725
7491	0.002878
7492	0.002859
7493	0.002799
7494	0.002911
7495	0.002777
7496	0.002852
7497	0.00286
7498	0.002836
7499	0.002662
7500	0.002983
7501	0.003254
7502	0.00285
7503	0.003144
7504	0.003732
7505	0.003457
7506	0.002798
7507	0.002903
7508	0.003301
7509	0.003294
7510	0.002839
7511	0.002437
7512	0.002449
7513	0.002516
7514	0.002736
7515	0.00297
7516	0.00295
7517	0.002467
7518	0.002123
7519	0.002112
7520	0.001979
7521	0.002253
7522	0.002911
7523	0.003009
7524	0.00286
7525	0.002726
7526	0.002896
7527	0.002909
7528	0.002926
7529	0.002995
7530	0.002507
7531	0.002108
7532	0.00272
7533	0.003134
7534	0.003236
7535	0.003681
7536	0.003725
7537	0.003239
7538	0.002681
7539	0.00265
7540	0.00285
7541	0.002836
7542	0.002624
7543	0.003101
7544	0.003427
7545	0.003605
7546	0.003191
7547	0.00289
7548	0.0031
7549	0.002912
7550	0.002676
7551	0.002622
7552	0.003056
7553	0.002907
7554	0.002856
7555	0.003536
7556	0.003802
7557	0.003468
7558	0.003382
7559	0.003722
7560	0.003554
7561	0.003307
7562	0.003116
7563	0.0024
7564	0.002177
7565	0.002495
7566	0.002979
7567	0.003126
7568	0.002792
7569	0.002621
7570	0.002956
7571	0.00335
7572	0.002922
7573	0.002322
7574	0.002435
7575	0.002535
7576	0.002773
7577	0.002763
7578	0.002403
7579	0.00255
7580	0.00257
7581	0.002361
7582	0.00251
7583	0.002706
7584	0.002865
7585	0.003142
7586	0.003049
7587	0.003328
7588	0.003282
7589	0.002692
7590	0.003016
7591	0.003435
7592	0.003237
7593	0.002996
7594	0.002954
7595	0.002632
7596	0.002705
7597	0.003163
7598	0.003301
7599	0.002856
7600	0.002733
7601	0.002821
7602	0.002652
7603	0.002163
7604	0.002219
7605	0.002645
7606	0.002958
7607	0.00344
7608	0.003166
7609	0.003099
7610	0.002859
7611	0.002723
7612	0.002332
7613	0.002582
7614	0.002684
7615	0.002537
7616	0.002544
7617	0.002727
7618	0.003237
7619	0.003089
7620	0.002955
7621	0.00264
7622	0.00244
7623	0.00246
7624	0.002579
7625	0.002359
7626	0.00254
7627	0.00299
7628	0.003396
7629	0.003123
7630	0.003178
7631	0.003621
7632	0.003463
7633	0.003131
7634	0.00307
7635	0.003546
7636	0.0034
7637	0.003268
7638	0.003324
7639	0.003136
7640	0.002916
7641	0.002857
7642	0.002978
7643	0.003669
7644	0.003527
7645	0.003157
7646	0.002736
7647	0.002728
7648	0.002805
7649	0.00284
7650	0.002857
7651	0.003587
7652	0.003357
7653	0.002803
7654	0.002739
7655	0.002651
7656	0.002532
7657	0.00281
7658	0.003191
7659	0.003361
7660	0.003322
7661	0.002625
7662	0.002234
7663	0.002084
7664	0.002165
7665	0.002802
7666	0.003352
7667	0.002919
7668	0.002672
7669	0.002507
7670	0.002424
7671	0.002593
7672	0.002821
7673	0.002627
7674	0.002686
7675	0.002728
7676	0.002711
7677	0.003033
7678	0.003247
7679	0.002921
7680	0.002437
7681	0.002607
7682	0.002549
7683	0.002446
7684	0.002643
7685	0.003359
7686	0.003334
7687	0.003041
7688	0.00299
7689	0.002856
7690	0.00267
7691	0.002495
7692	0.002688
7693	0.003067
7694	0.003046
7695	0.002459
7696	0.002186
7697	0.002733
7698	0.003223
7699	0.003211
7700	0.002881
7701	0.002695
7702	0.002356
7703	0.002688
7704	0.003145
7705	0.003487
7706	0.003511
7707	0.003153
7708	0.003385
7709	0.003395
7710	0.003212
7711	0.002794
7712	0.002994
7713	0.003266
7714	0.003581
7715	0.003401
7716	0.003418
7717	0.002486
7718	0.002363
7719	0.002723
7720	0.002918
7721	0.002815
7722	0.002994
7723	0.00295
7724	0.003128
7725	0.00308
7726	0.002543
7727	0.002513
7728	0.002536
7729	0.002672
7730	0.002818
7731	0.003006
7732	0.002757
7733	0.00287
7734	0.002683
7735	0.002361
7736	0.002556
7737	0.002575
7738	0.002432
7739	0.00277
7740	0.002835
7741	0.002475
7742	0.002712
7743	0.002734
7744	0.002579
7745	0.002952
7746	0.003289
7747	0.003019
7748	0.002611
7749	0.002511
7750	0.002721
7751	0.003064
7752	0.003118
7753	0.002825
7754	0.002797
7755	0.002738
7756	0.002681
7757	0.002624
7758	0.002761
7759	0.002721
7760	0.002749
7761	0.003187
7762	0.003014
7763	0.002645
7764	0.00243
7765	0.002632
7766	0.002846
7767	0.003395
7768	0.003415
7769	0.003188
7770	0.002471
7771	0.002401
7772	0.002669
7773	0.002254
7774	0.002691
7775	0.003132
7776	0.003116
7777	0.002909
7778	0.00299
7779	0.002821
7780	0.003133
7781	0.002873
7782	0.002361
7783	0.002883
7784	0.003004
7785	0.002732
7786	0.002686
7787	0.002461
7788	0.002107
7789	0.002249
7790	0.002768
7791	0.003307
7792	0.003029
7793	0.002708
7794	0.00287
7795	0.003232
7796	0.003133
7797	0.00278
7798	0.002524
7799	0.003162
7800	0.003321
7801	0.003018
7802	0.002849
7803	0.002937
7804	0.002862
7805	0.002462
7806	0.002713
7807	0.002806
7808	0.002743
7809	0.002904
7810	0.003109
7811	0.002854
7812	0.002536
7813	0.002256
7814	0.002414
7815	0.003081
7816	0.003654
7817	0.003352
7818	0.003009
7819	0.003128
7820	0.003385
7821	0.002867
7822	0.002714
7823	0.002516
7824	0.002631
7825	0.00294
7826	0.00348
7827	0.003257
7828	0.002836
7829	0.002798
7830	0.002839
7831	0.002542
7832	0.002889
7833	0.00281
7834	0.002754
7835	0.00254
7836	0.002452
7837	0.002817
7838	0.0029
7839	0.00278
7840	0.002467
7841	0.002492
7842	0.002594
7843	0.002627
7844	0.003043
7845	0.003181
7846	0.003195
7847	0.003019
7848	0.003034
7849	0.003139
7850	0.002949
7851	0.003032
7852	0.002908
7853	0.003037
7854	0.003521
7855	0.003183
7856	0.003038
7857	0.003019
7858	0.002895
7859	0.003155
7860	0.003392
7861	0.003157
7862	0.002862
7863	0.003326
7864	0.003271
7865	0.003174
7866	0.003211
7867	0.00305
7868	0.003293
7869	0.003097
7870	0.002613
7871	0.002112
7872	0.002301
7873	0.002577
7874	0.003085
7875	0.003156
7876	0.00287
7877	0.002513
7878	0.002754
7879	0.003114
7880	0.002851
7881	0.002837
7882	0.002893
7883	0.002882
7884	0.002628
7885	0.00277
7886	0.002729
7887	0.002718
7888	0.002526
7889	0.002606
7890	0.002727
7891	0.003051
7892	0.002722
7893	0.002655
7894	0.002936
7895	0.003202
7896	0.002979
7897	0.003214
7898	0.002622
7899	0.002415
7900	0.002483
7901	0.002248
7902	0.00239
7903	0.002536
7904	0.003162
7905	0.003411
7906	0.003072
7907	0.002677
7908	0.002887
7909	0.003297
7910	0.003644
7911	0.003703
7912	0.003487
7913	0.002983
7914	0.002841
7915	0.002976
7916	0.002849
7917	0.002582
7918	0.002903
7919	0.002987
7920	0.002932
7921	0.00341
7922	0.003848
7923	0.003429
7924	0.003134
7925	0.002805
7926	0.002465
7927	0.002705
7928	0.003855
7929	0.004114
7930	0.003826
7931	0.003382
7932	0.003315
7933	0.002795
7934	0.002612
7935	0.002662
7936	0.002748
7937	0.002727
7938	0.002679
7939	0.002538
7940	0.00261
7941	0.002809
7942	0.002606
7943	0.002813
7944	0.002884
7945	0.002842
7946	0.002695
7947	0.002682
7948	0.002825
7949	0.00283
7950	0.003298
7951	0.003268
7952	0.003121
7953	0.00279
7954	0.003063
7955	0.00283
7956	0.002646
7957	0.002396
7958	0.002541
7959	0.003073
7960	0.003186
7961	0.002905
7962	0.003035
7963	0.003169
7964	0.002983
7965	0.00255
7966	0.00251
7967	0.002593
7968	0.002842
7969	0.002872
7970	0.002575
7971	0.002544
7972	0.002474
7973	0.002703
7974	0.003347
7975	0.003356
7976	0.003002
7977	0.002876
7978	0.002793
7979	0.003007
7980	0.003049
7981	0.002883
7982	0.00258
7983	0.002671
7984	0.003018
7985	0.003816
7986	0.003845
7987	0.002935
7988	0.002524
7989	0.002949
7990	0.003032
7991	0.002639
7992	0.002346
7993	0.002738
7994	0.003012
7995	0.003049
7996	0.00321
7997	0.00303
7998	0.003142
[truncated: 4,001 more rows]

## Sheet: WT Replicate 4
Time	UV
6000	0.002907
6001	0.002847
6002	0.002919
6003	0.002831
6004	0.00284
6005	0.002281
6006	0.001432
6007	0.000975
6008	0.000918
6009	0.0007
6010	0.000473
6011	0.000441
6012	0.000567
6013	0.000554
6014	0.000525
6015	0.000442
6016	0.000368
6017	0.000457
6018	0.000658
6019	0.000749
6020	0.000836
6021	0.000934
6022	0.000871
6023	0.000875
6024	0.000971
6025	0.000988
6026	0.000923
6027	0.00084
6028	0.000889
6029	0.000929
6030	0.000895
6031	0.000897
6032	0.001051
6033	0.001134
6034	0.001082
6035	0.000898
6036	0.000847
6037	0.000931
6038	0.001184
6039	0.001492
6040	0.001493
6041	0.001394
6042	0.00134
6043	0.00126
6044	0.00124
6045	0.001284
6046	0.001465
6047	0.001557
6048	0.001461
6049	0.00126
6050	0.00117
6051	0.001134
6052	0.001112
6053	0.000966
6054	0.001041
6055	0.001131
6056	0.001186
6057	0.001215
6058	0.001341
6059	0.001244
6060	0.001147
6061	0.001083
6062	0.001225
6063	0.001333
6064	0.001271
6065	0.001031
6066	0.000743
6067	0.000698
6068	0.000885
6069	0.001027
6070	0.001085
6071	0.001176
6072	0.001116
6073	0.000937
6074	0.000769
6075	0.00096
6076	0.001055
6077	0.000997
6078	0.000978
6079	0.001003
6080	0.000802
6081	0.000575
6082	0.000481
6083	0.00054
6084	0.000433
6085	0.000316
6086	0.000361
6087	0.000401
6088	0.000219
6089	-0.00031
6090	-0.0009
6091	-0.001255
6092	-0.00139
6093	-0.001293
6094	-0.001349
6095	-0.00129
6096	-0.001106
6097	-0.001051
6098	-0.000966
6099	-0.000928
6100	-0.000945
6101	-0.000895
6102	-0.000804
6103	-0.000796
6104	-0.000897
6105	-0.000852
6106	-0.000722
6107	-0.000694
6108	-0.000599
6109	-0.000581
6110	-0.000632
6111	-0.00067
6112	-0.000638
6113	-0.000548
6114	-0.000546
6115	-0.000622
6116	-0.000609
6117	-0.000581
6118	-0.000484
6119	-0.000553
6120	-0.000665
6121	-0.000826
6122	-0.001
6123	-0.001117
6124	-0.001231
6125	-0.001213
6126	-0.001104
6127	-0.000896
6128	-0.000606
6129	-0.00041
6130	-0.000321
6131	-0.000423
6132	-0.000447
6133	-0.000319
6134	-8.2e-05
6135	0.000126
6136	0.00016
6137	9.1e-05
6138	8.8e-05
6139	0.000194
6140	0.00033
6141	0.000476
6142	0.000578
6143	0.000555
6144	0.000381
6145	0.000198
6146	0.000207
6147	0.000192
6148	0.000127
6149	1.5e-05
6150	-8.5e-05
6151	-0.000377
6152	-0.000452
6153	-0.000345
6154	-0.000239
6155	-0.000115
6156	3.1e-05
6157	-6.2e-05
6158	-0.000143
6159	-0.00016
6160	-0.000157
6161	-0.000166
6162	-0.000229
6163	-0.000371
6164	-0.000351
6165	-0.000217
6166	-0.000119
6167	-4.4e-05
6168	-0.000141
6169	-0.000298
6170	-0.000471
6171	-0.000409
6172	-0.000382
6173	-0.000482
6174	-0.00046
6175	-0.000421
6176	-0.000467
6177	-0.000579
6178	-0.000701
6179	-0.000797
6180	-0.000801
6181	-0.000769
6182	-0.000893
6183	-0.000898
6184	-0.000723
6185	-0.000405
6186	2e-05
6187	0.000153
6188	0.000209
6189	0.000474
6190	0.000688
6191	0.000649
6192	0.000466
6193	0.00029
6194	-8.1e-05
6195	-0.000545
6196	-0.000991
6197	-0.001088
6198	-0.001115
6199	-0.001163
6200	-0.001207
6201	-0.001314
6202	-0.001274
6203	-0.001255
6204	-0.001126
6205	-0.001146
6206	-0.001301
6207	-0.001385
6208	-0.00134
6209	-0.001322
6210	-0.001433
6211	-0.001496
6212	-0.001536
6213	-0.00159
6214	-0.001629
6215	-0.001469
6216	-0.001195
6217	-0.000904
6218	-0.000725
6219	-0.000759
6220	-0.000895
6221	-0.001163
6222	-0.001265
6223	-0.001231
6224	-0.001157
6225	-0.001004
6226	-0.000941
6227	-0.000941
6228	-0.000895
6229	-0.000732
6230	-0.000542
6231	-0.000354
6232	-0.000256
6233	-0.000355
6234	-0.000458
6235	-0.000469
6236	-0.00056
6237	-0.000752
6238	-0.000976
6239	0
6240	3e-06
6241	1.9e-05
6242	0.000189
6243	0.000372
6244	0.000475
6245	0.000534
6246	0.000664
6247	0.000686
6248	0.000753
6249	0.000798
6250	0.000796
6251	0.000699
6252	0.000594
6253	0.000487
6254	0.000356
6255	0.000332
6256	0.000347
6257	0.000421
6258	0.000482
6259	0.000487
6260	0.000375
6261	0.000353
6262	0.000375
6263	0.000301
6264	0.000183
6265	7.4e-05
6266	-3.2e-05
6267	-0.000134
6268	-0.000257
6269	-0.000265
6270	-0.000129
6271	-8.3e-05
6272	3.9e-05
6273	8.1e-05
6274	3.1e-05
6275	-0.000145
6276	-0.000191
6277	-0.000145
6278	-9.8e-05
6279	-8.1e-05
6280	-2e-06
6281	-1.5e-05
6282	-8.7e-05
6283	-1.3e-05
6284	2.2e-05
6285	0.00011
6286	0.000216
6287	0.000421
6288	0.000495
6289	0.000539
6290	0.00065
6291	0.00061
6292	0.000499
6293	0.000483
6294	0.000447
6295	0.000445
6296	0.000381
6297	0.000323
6298	0.000281
6299	0.000362
6300	0.000521
6301	0.0007
6302	0.000862
6303	0.000978
6304	0.000989
6305	0.000983
6306	0.001014
6307	0.001049
6308	0.001035
6309	0.001064
6310	0.000983
6311	0.000879
6312	0.000811
6313	0.000695
6314	0.000497
6315	0.000374
6316	0.000411
6317	0.000537
6318	0.000763
6319	0.000898
6320	0.000934
6321	0.001001
6322	0.000927
6323	0.000864
6324	0.000664
6325	0.000462
6326	0.000336
6327	0.000305
6328	0.000303
6329	0.000357
6330	0.000547
6331	0.000722
6332	0.000682
6333	0.000728
6334	0.000657
6335	0.000491
6336	0.000457
6337	0.000575
6338	0.000916
6339	0.001292
6340	0.001417
6341	0.00134
6342	0.001187
6343	0.001087
6344	0.001102
6345	0.001139
6346	0.001164
6347	0.00132
6348	0.001349
6349	0.001168
6350	0.000958
6351	0.000854
6352	0.000819
6353	0.000835
6354	0.000909
6355	0.000945
6356	0.000958
6357	0.001016
6358	0.001152
6359	0.001168
6360	0.0011
6361	0.001117
6362	0.001209
6363	0.001293
6364	0.001269
6365	0.0012
6366	0.001127
6367	0.001036
6368	0.001107
6369	0.001248
6370	0.001267
6371	0.001192
6372	0.001377
6373	0.001523
6374	0.001455
6375	0.001222
6376	0.00124
6377	0.001215
6378	0.001211
6379	0.001152
6380	0.001188
6381	0.001278
6382	0.001118
6383	0.000889
6384	0.000799
6385	0.000689
6386	0.00056
6387	0.000474
6388	0.000532
6389	0.000608
6390	0.000559
6391	0.000457
6392	0.000498
6393	0.000467
6394	0.000321
6395	0.000206
6396	0.000245
6397	0.000295
6398	0.000354
6399	0.000368
6400	0.000356
6401	0.000286
6402	9e-05
6403	-5.3e-05
6404	-5.6e-05
6405	0.000175
6406	0.000592
6407	0.000675
6408	0.00056
6409	0.000488
6410	0.000508
6411	0.000639
6412	0.000771
6413	0.000735
6414	0.000757
6415	0.000805
6416	0.000914
6417	0.000836
6418	0.000693
6419	0.000572
6420	0.000561
6421	0.000742
6422	0.000962
6423	0.001016
6424	0.001115
6425	0.001155
6426	0.00106
6427	0.000986
6428	0.000987
6429	0.000903
6430	0.000903
6431	0.000946
6432	0.000815
6433	0.000655
6434	0.000618
6435	0.000746
6436	0.000782
6437	0.000904
6438	0.000992
6439	0.001022
6440	0.00104
6441	0.001214
6442	0.001337
6443	0.001332
6444	0.001293
6445	0.001191
6446	0.000959
6447	0.000941
6448	0.001023
6449	0.001237
6450	0.001397
6451	0.001431
6452	0.001323
6453	0.001109
6454	0.00087
6455	0.000836
6456	0.000842
6457	0.000955
6458	0.001012
6459	0.001016
6460	0.001035
6461	0.001089
6462	0.001164
6463	0.001171
6464	0.001148
6465	0.001164
6466	0.001143
6467	0.001022
6468	0.000953
6469	0.001037
6470	0.001039
6471	0.000961
6472	0.000783
6473	0.000678
6474	0.000657
6475	0.000669
6476	0.000632
6477	0.000665
6478	0.0011
6479	0.001682
6480	0.00182
6481	0.001557
6482	0.001495
6483	0.001424
6484	0.001285
6485	0.001154
6486	0.001222
6487	0.001334
6488	0.001361
6489	0.001442
6490	0.0015
6491	0.001578
6492	0.001528
6493	0.001573
6494	0.001567
6495	0.001389
6496	0.001293
6497	0.001129
6498	0.001241
6499	0.001728
6500	0.00213
6501	0.001991
6502	0.001784
6503	0.001859
6504	0.002074
6505	0.002151
6506	0.002236
6507	0.002369
6508	0.002276
6509	0.002046
6510	0.002032
6511	0.002068
6512	0.001911
6513	0.001833
6514	0.001945
6515	0.002149
6516	0.002073
6517	0.001975
6518	0.001921
6519	0.001903
6520	0.001923
6521	0.002014
6522	0.001981
6523	0.001952
6524	0.001966
6525	0.002178
6526	0.002282
6527	0.002429
6528	0.002601
6529	0.002625
6530	0.002545
6531	0.002564
6532	0.002678
6533	0.002684
6534	0.002718
6535	0.002838
6536	0.002919
6537	0.003043
6538	0.003339
6539	0.003482
6540	0.003236
6541	0.002966
6542	0.002788
6543	0.002566
6544	0.002064
6545	0.001801
6546	0.001861
6547	0.001899
6548	0.001921
6549	0.001928
6550	0.002055
6551	0.002205
6552	0.002197
6553	0.00211
6554	0.002012
6555	0.001972
6556	0.00192
6557	0.001843
6558	0.001751
6559	0.001756
6560	0.001918
6561	0.002129
6562	0.001894
6563	0.001733
6564	0.001712
6565	0.001747
6566	0.001741
6567	0.001896
6568	0.002104
6569	0.002458
6570	0.002554
6571	0.002611
6572	0.002553
6573	0.002328
6574	0.002265
6575	0.002386
6576	0.002617
6577	0.002593
6578	0.002581
6579	0.002588
6580	0.002422
6581	0.002082
6582	0.002113
6583	0.00186
6584	0.001813
6585	0.001718
6586	0.001719
6587	0.001703
6588	0.001843
6589	0.001887
6590	0.001996
6591	0.002091
6592	0.002253
6593	0.002274
6594	0.002097
6595	0.002142
6596	0.002458
6597	0.002641
6598	0.002585
6599	0.002503
6600	0.002563
6601	0.002406
6602	0.002276
6603	0.00215
6604	0.00201
6605	0.001824
6606	0.001803
6607	0.001904
6608	0.001867
6609	0.001684
6610	0.001619
6611	0.001605
6612	0.00157
6613	0.001614
6614	0.001657
6615	0.001623
6616	0.0016
6617	0.001571
6618	0.001565
6619	0.001622
6620	0.001681
6621	0.001677
6622	0.00169
6623	0.001684
6624	0.001631
6625	0.001528
6626	0.001451
6627	0.001535
6628	0.001699
6629	0.00187
6630	0.001846
6631	0.001748
6632	0.001659
6633	0.001598
6634	0.001587
6635	0.00181
6636	0.002192
6637	0.002259
6638	0.001937
6639	0.001934
6640	0.002115
6641	0.002457
6642	0.002644
6643	0.002642
6644	0.002615
6645	0.002656
6646	0.002511
6647	0.00231
6648	0.002388
6649	0.002793
6650	0.003186
6651	0.003184
6652	0.002982
6653	0.002908
6654	0.00268
6655	0.00242
6656	0.002172
6657	0.002083
6658	0.002118
6659	0.00202
6660	0.001909
6661	0.002009
6662	0.002145
6663	0.002297
6664	0.002306
6665	0.002214
6666	0.002177
6667	0.002237
6668	0.002403
6669	0.002426
6670	0.002315
6671	0.002152
6672	0.002031
6673	0.001978
6674	0.001894
6675	0.002135
6676	0.002549
6677	0.003026
6678	0.003187
6679	0.003125
6680	0.002889
6681	0.002702
6682	0.002774
6683	0.003062
6684	0.003191
6685	0.003213
6686	0.003195
6687	0.003105
6688	0.003013
6689	0.002992
6690	0.002914
6691	0.003004
6692	0.003045
6693	0.002863
6694	0.002525
6695	0.002432
6696	0.002319
6697	0.002437
6698	0.002691
6699	0.002867
6700	0.002781
6701	0.002753
6702	0.002769
6703	0.002771
6704	0.002887
6705	0.003022
6706	0.002959
6707	0.002855
6708	0.002855
6709	0.002852
6710	0.002866
6711	0.003004
6712	0.003146
6713	0.003084
6714	0.002938
6715	0.002802
6716	0.002795
6717	0.002861
6718	0.002923
6719	0.002846
6720	0.002686
6721	0.002556
6722	0.00261
6723	0.002711
6724	0.002786
6725	0.003062
6726	0.003327
6727	0.003492
6728	0.003362
6729	0.003202
6730	0.003051
6731	0.003078
6732	0.003152
6733	0.003083
6734	0.002997
6735	0.003037
6736	0.003112
6737	0.003208
6738	0.00311
6739	0.002816
6740	0.002704
6741	0.002705
6742	0.002774
6743	0.002688
6744	0.002528
6745	0.002575
6746	0.0027
6747	0.002589
6748	0.002458
6749	0.002491
6750	0.002567
6751	0.002528
6752	0.002435
6753	0.002558
6754	0.002715
6755	0.002768
6756	0.00293
6757	0.003019
6758	0.003098
6759	0.003075
6760	0.002999
6761	0.002866
6762	0.002878
6763	0.003065
6764	0.003065
6765	0.00289
6766	0.002649
6767	0.002588
6768	0.002612
6769	0.002622
6770	0.002774
6771	0.002935
6772	0.002921
6773	0.002898
6774	0.002982
6775	0.003134
6776	0.003247
6777	0.003405
6778	0.003506
6779	0.003556
6780	0.003427
6781	0.003114
6782	0.00307
6783	0.003314
6784	0.00342
6785	0.00327
6786	0.003234
6787	0.003327
6788	0.0034
6789	0.003386
6790	0.00331
6791	0.003258
6792	0.003196
6793	0.003198
6794	0.003156
6795	0.00315
6796	0.003237
6797	0.003263
6798	0.003307
6799	0.003403
6800	0.003457
6801	0.00339
6802	0.00336
6803	0.003546
6804	0.003707
6805	0.003806
6806	0.003848
6807	0.003881
6808	0.004026
6809	0.004223
6810	0.004115
6811	0.003797
6812	0.003591
6813	0.00356
6814	0.003529
6815	0.003478
6816	0.003396
6817	0.003326
6818	0.003324
6819	0.003248
6820	0.003194
6821	0.00325
6822	0.003211
6823	0.003113
6824	0.002952
6825	0.002802
6826	0.00263
6827	0.002602
6828	0.002591
6829	0.002489
6830	0.002368
6831	0.002335
6832	0.002512
6833	0.002709
6834	0.002645
6835	0.002413
6836	0.002443
6837	0.002577
6838	0.002562
6839	0.002449
6840	0.002264
6841	0.002158
6842	0.001971
6843	0.001828
6844	0.001763
6845	0.001773
6846	0.001733
6847	0.001723
6848	0.001852
6849	0.002009
6850	0.00205
6851	0.001967
6852	0.001803
6853	0.001842
6854	0.001969
6855	0.002129
6856	0.002158
6857	0.002026
6858	0.002079
6859	0.002025
6860	0.002037
6861	0.001975
6862	0.001669
6863	0.001324
6864	0.001351
6865	0.001383
6866	0.001372
6867	0.001184
6868	0.001308
6869	0.001498
6870	0.001683
6871	0.001742
6872	0.001712
6873	0.001668
6874	0.00165
6875	0.00163
6876	0.001633
6877	0.001632
6878	0.001643
6879	0.001653
6880	0.001676
6881	0.001574
6882	0.001388
6883	0.001294
6884	0.001395
6885	0.001645
6886	0.001744
6887	0.001636
6888	0.001543
6889	0.001621
6890	0.00165
6891	0.001593
6892	0.001552
6893	0.001457
6894	0.001337
6895	0.001361
6896	0.001393
6897	0.001372
6898	0.001296
6899	0.001322
6900	0.001461
6901	0.001638
6902	0.001517
6903	0.001304
6904	0.001293
6905	0.001387
6906	0.00142
6907	0.001462
6908	0.001524
6909	0.001591
6910	0.001615
6911	0.001581
6912	0.00155
6913	0.001596
6914	0.00147
6915	0.001372
6916	0.001383
6917	0.0014
6918	0.001315
6919	0.001142
6920	0.001046
6921	0.001119
6922	0.001235
6923	0.00118
6924	0.001329
6925	0.001522
6926	0.001669
6927	0.001587
6928	0.001449
6929	0.001391
6930	0.001463
6931	0.001535
6932	0.001525
6933	0.001602
6934	0.00182
6935	0.001956
6936	0.001879
6937	0.001788
6938	0.001721
6939	0.001703
6940	0.001843
6941	0.001935
6942	0.001917
6943	0.001805
6944	0.001645
6945	0.001453
6946	0.001325
6947	0.001273
6948	0.001442
6949	0.001625
6950	0.001706
6951	0.00173
6952	0.001783
6953	0.001989
6954	0.002219
6955	0.002226
6956	0.002108
6957	0.001961
6958	0.001921
6959	0.001902
6960	0.00196
6961	0.002027
6962	0.001989
6963	0.001983
6964	0.001892
6965	0.001824
6966	0.001804
6967	0.001803
6968	0.001818
6969	0.001849
6970	0.002031
6971	0.002253
6972	0.002264
6973	0.002099
6974	0.002067
6975	0.002201
6976	0.002332
6977	0.002296
6978	0.002233
6979	0.002368
6980	0.002467
6981	0.002648
6982	0.002437
6983	0.002195
6984	0.002133
6985	0.002124
6986	0.002135
6987	0.002204
6988	0.002278
6989	0.002292
6990	0.002271
6991	0.00222
6992	0.002204
6993	0.002288
6994	0.002238
6995	0.002066
6996	0.002009
6997	0.002089
6998	0.002129
6999	0.00204
7000	0.001937
7001	0.001835
7002	0.001807
7003	0.001942
7004	0.00198
7005	0.00197
7006	0.001857
7007	0.001609
7008	0.001544
7009	0.001607
7010	0.001729
7011	0.001847
7012	0.001923
7013	0.001858
7014	0.001855
7015	0.001946
7016	0.002006
7017	0.001984
7018	0.002077
7019	0.002232
7020	0.002319
7021	0.002477
7022	0.002655
7023	0.002853
7024	0.002816
7025	0.00272
7026	0.002479
7027	0.002333
7028	0.002205
7029	0.002111
7030	0.00216
7031	0.002521
7032	0.002685
7033	0.002546
7034	0.002288
7035	0.002226
7036	0.002268
7037	0.002169
7038	0.002049
7039	0.002068
7040	0.002071
7041	0.001983
7042	0.001803
7043	0.001674
7044	0.001603
7045	0.001656
7046	0.001699
7047	0.001649
7048	0.001705
7049	0.001987
7050	0.002189
7051	0.002076
7052	0.001998
7053	0.002108
7054	0.002201
7055	0.002243
7056	0.002296
7057	0.002394
7058	0.002634
7059	0.002733
7060	0.002618
7061	0.002629
7062	0.002666
7063	0.002661
7064	0.002607
7065	0.002742
7066	0.002661
7067	0.002522
7068	0.002302
7069	0.001973
7070	0.001694
7071	0.001704
7072	0.001829
7073	0.001731
7074	0.00142
7075	0.001373
7076	0.001526
7077	0.001635
7078	0.001655
7079	0.00176
7080	0.001753
7081	0.001631
7082	0.00145
7083	0.001229
7084	0.001161
7085	0.001201
7086	0.001125
7087	0.000942
7088	0.001021
7089	0.001267
7090	0.001401
7091	0.001473
7092	0.001546
7093	0.001578
7094	0.001555
7095	0.001626
7096	0.001643
7097	0.001685
7098	0.001679
7099	0.001609
7100	0.001441
7101	0.001494
7102	0.00152
7103	0.001538
7104	0.001514
7105	0.001474
7106	0.001456
7107	0.001553
7108	0.001703
7109	0.001844
7110	0.001826
7111	0.001646
7112	0.001513
7113	0.001523
7114	0.001596
7115	0.001606
7116	0.001535
7117	0.001482
7118	0.001504
7119	0.001625
7120	0.001608
7121	0.001475
7122	0.0014
7123	0.001505
7124	0.001715
7125	0.001854
7126	0.001801
7127	0.001746
7128	0.001911
7129	0.002151
7130	0.002235
7131	0.002157
7132	0.001839
7133	0.001515
7134	0.001376
7135	0.001453
7136	0.001641
7137	0.001698
7138	0.001653
7139	0.001616
7140	0.001535
7141	0.001521
7142	0.001426
7143	0.001219
7144	0.00109
7145	0.001214
7146	0.001432
7147	0.001626
7148	0.001762
7149	0.001845
7150	0.001883
7151	0.001676
7152	0.001424
7153	0.001167
7154	0.001203
7155	0.001287
7156	0.001251
7157	0.001304
7158	0.00136
7159	0.001506
7160	0.001584
7161	0.001558
7162	0.001437
7163	0.00143
7164	0.001505
7165	0.001527
7166	0.001466
7167	0.001627
7168	0.001845
7169	0.0019
7170	0.001818
7171	0.00171
7172	0.001608
7173	0.00177
7174	0.002091
7175	0.002317
7176	0.002323
7177	0.002222
7178	0.002319
7179	0.002404
7180	0.002381
7181	0.002281
7182	0.002206
7183	0.002107
7184	0.001878
7185	0.001871
7186	0.00206
7187	0.002127
7188	0.002056
7189	0.00204
7190	0.002071
7191	0.002137
7192	0.002379
7193	0.002663
7194	0.002719
7195	0.002679
7196	0.002704
7197	0.002527
7198	0.002413
7199	0.002483
7200	0.002519
7201	0.002361
7202	0.002256
7203	0.002239
7204	0.002355
7205	0.00248
7206	0.002613
7207	0.002785
7208	0.002712
7209	0.00253
7210	0.002477
7211	0.002436
7212	0.002369
7213	0.002331
7214	0.002412
7215	0.002422
7216	0.002344
7217	0.00227
7218	0.002094
7219	0.002048
7220	0.002059
7221	0.002048
7222	0.002128
7223	0.002307
7224	0.00242
7225	0.002406
7226	0.002372
7227	0.0023
7228	0.002221
7229	0.00211
7230	0.00203
7231	0.001956
7232	0.001904
7233	0.001685
7234	0.001512
7235	0.001593
7236	0.001705
7237	0.001715
7238	0.001778
7239	0.001815
7240	0.001899
7241	0.001954
7242	0.002026
7243	0.002288
7244	0.002414
7245	0.002541
7246	0.002734
7247	0.002996
7248	0.002954
7249	0.002757
7250	0.00262
7251	0.002464
7252	0.002399
7253	0.002375
7254	0.002219
7255	0.002095
7256	0.001941
7257	0.001864
7258	0.001866
7259	0.001902
7260	0.00177
7261	0.001663
7262	0.001625
7263	0.00152
7264	0.001493
7265	0.001585
7266	0.001748
7267	0.001852
7268	0.001801
7269	0.001798
7270	0.001751
7271	0.001642
7272	0.00158
7273	0.001626
7274	0.001636
7275	0.001459
7276	0.001363
7277	0.001425
7278	0.001483
7279	0.001397
7280	0.001156
7281	0.000979
7282	0.001032
7283	0.001208
7284	0.001269
7285	0.001032
7286	0.000865
7287	0.000912
7288	0.001045
7289	0.001238
7290	0.001357
7291	0.001465
7292	0.001607
7293	0.001662
7294	0.001566
7295	0.001528
7296	0.001578
7297	0.001676
7298	0.001623
7299	0.001456
7300	0.001287
7301	0.001105
7302	0.001029
7303	0.001048
7304	0.001109
7305	0.001053
7306	0.000992
7307	0.000941
7308	0.000936
7309	0.000949
7310	0.000993
7311	0.000972
7312	0.00099
7313	0.001023
7314	0.001133
7315	0.001167
7316	0.001161
7317	0.001104
7318	0.00112
7319	0.001047
7320	0.001039
7321	0.001197
7322	0.001242
7323	0.001096
7324	0.000969
7325	0.000881
7326	0.000799
7327	0.000765
7328	0.000789
7329	0.000866
7330	0.000882
7331	0.000988
7332	0.001148
7333	0.001293
7334	0.001185
7335	0.000973
7336	0.000769
7337	0.000787
7338	0.000871
7339	0.000945
7340	0.001074
7341	0.001345
7342	0.001494
7343	0.001667
7344	0.001729
7345	0.001667
7346	0.001462
7347	0.001296
7348	0.001273
7349	0.00142
7350	0.001548
7351	0.001621
7352	0.001601
7353	0.001469
7354	0.001293
7355	0.001196
7356	0.001318
7357	0.001279
7358	0.001338
7359	0.00163
7360	0.001818
7361	0.001671
7362	0.001685
7363	0.001634
7364	0.00136
7365	0.001393
7366	0.001466
7367	0.001493
7368	0.001409
7369	0.001543
7370	0.001506
7371	0.001436
7372	0.00149
7373	0.001567
7374	0.001687
7375	0.001727
7376	0.001673
7377	0.001619
7378	0.001669
7379	0.001672
7380	0.001832
7381	0.002029
7382	0.002134
7383	0.00182
7384	0.001646
7385	0.001646
7386	0.001759
7387	0.00177
7388	0.00179
7389	0.001851
7390	0.001747
7391	0.001844
7392	0.002159
7393	0.002048
7394	0.00189
7395	0.001914
7396	0.002089
7397	0.002042
7398	0.001903
7399	0.001775
7400	0.001849
7401	0.001937
7402	0.001906
7403	0.002017
7404	0.002158
7405	0.00222
7406	0.002155
7407	0.002187
7408	0.002117
7409	0.002159
7410	0.002272
7411	0.002535
7412	0.002674
7413	0.002713
7414	0.002746
7415	0.002575
7416	0.002339
7417	0.002308
7418	0.002421
7419	0.002443
7420	0.002376
7421	0.002511
7422	0.002828
7423	0.002977
7424	0.002975
7425	0.00276
7426	0.002679
7427	0.002676
7428	0.002659
7429	0.002722
7430	0.002856
7431	0.003068
7432	0.00316
7433	0.003217
7434	0.003163
7435	0.003003
7436	0.002884
7437	0.002905
7438	0.002913
7439	0.002881
7440	0.002882
7441	0.002873
7442	0.002984
7443	0.003133
7444	0.00305
7445	0.003018
7446	0.003108
7447	0.00331
7448	0.00339
7449	0.003378
7450	0.003331
7451	0.003277
7452	0.003327
7453	0.00343
7454	0.003551
7455	0.003587
7456	0.003565
7457	0.003562
7458	0.003339
7459	0.003282
7460	0.003067
7461	0.002973
7462	0.002902
7463	0.003047
7464	0.003235
7465	0.003382
7466	0.00333
7467	0.003373
7468	0.003417
7469	0.003412
7470	0.003373
7471	0.003416
7472	0.003357
7473	0.003306
7474	0.003412
7475	0.003492
7476	0.003464
7477	0.003344
7478	0.00346
7479	0.003691
7480	0.003761
7481	0.003495
7482	0.003386
7483	0.003468
7484	0.003377
7485	0.003036
7486	0.002983
7487	0.00297
7488	0.002961
7489	0.003048
7490	0.003073
7491	0.003211
7492	0.003263
7493	0.003348
7494	0.003541
7495	0.003786
7496	0.003714
7497	0.003592
7498	0.003368
7499	0.003279
7500	0.003186
7501	0.003174
7502	0.003203
7503	0.003242
7504	0.003137
7505	0.003048
7506	0.003212
7507	0.00352
7508	0.003762
7509	0.003843
7510	0.003883
7511	0.003759
7512	0.003672
7513	0.003632
7514	0.00342
7515	0.003277
7516	0.003414
7517	0.003659
7518	0.003773
7519	0.00382
7520	0.003853
7521	0.00376
7522	0.003724
7523	0.003648
7524	0.003657
7525	0.003916
7526	0.00424
7527	0.004313
7528	0.004079
7529	0.003871
7530	0.003944
7531	0.003956
7532	0.003737
7533	0.003537
7534	0.003657
7535	0.003765
7536	0.003769
7537	0.003756
7538	0.004036
7539	0.00446
7540	0.004569
7541	0.004384
7542	0.004219
7543	0.004107
7544	0.004108
7545	0.003881
7546	0.003756
7547	0.003651
7548	0.003539
7549	0.003542
7550	0.003556
7551	0.003526
7552	0.003387
7553	0.003302
7554	0.003427
7555	0.003523
7556	0.003577
7557	0.003718
7558	0.003853
7559	0.00396
7560	0.004144
7561	0.004228
7562	0.004237
7563	0.00412
7564	0.004037
7565	0.003865
7566	0.003689
7567	0.003693
7568	0.00386
7569	0.003909
7570	0.003863
7571	0.003839
7572	0.003792
7573	0.003726
7574	0.00353
7575	0.003138
7576	0.002946
7577	0.002979
7578	0.002981
7579	0.002865
7580	0.002835
7581	0.002818
7582	0.002696
7583	0.00264
7584	0.002703
7585	0.002779
7586	0.002551
7587	0.002225
7588	0.002097
7589	0.001849
7590	0.001645
7591	0.001639
7592	0.001745
7593	0.001743
7594	0.001788
7595	0.001856
7596	0.001896
7597	0.001856
7598	0.001806
7599	0.001782
7600	0.001791
7601	0.001847
7602	0.001885
7603	0.002029
7604	0.002199
7605	0.002332
7606	0.002318
7607	0.002225
7608	0.002054
7609	0.002042
7610	0.001942
7611	0.001762
7612	0.001685
7613	0.001809
7614	0.001857
7615	0.001842
7616	0.001918
7617	0.002219
7618	0.002689
7619	0.002901
7620	0.00291
7621	0.002849
7622	0.002841
7623	0.002946
7624	0.002934
7625	0.002792
7626	0.00267
7627	0.002674
7628	0.002745
7629	0.002703
7630	0.002631
7631	0.002714
7632	0.002884
7633	0.003081
7634	0.003275
7635	0.003435
7636	0.003466
7637	0.003224
7638	0.003244
7639	0.003308
7640	0.003158
7641	0.002878
7642	0.002761
7643	0.002814
7644	0.002821
7645	0.002831
7646	0.00288
7647	0.002911
7648	0.002862
7649	0.00284
7650	0.003004
7651	0.003347
7652	0.003487
7653	0.003424
7654	0.003383
7655	0.00347
7656	0.003537
7657	0.003459
7658	0.003323
7659	0.003226
7660	0.003272
7661	0.003321
7662	0.003456
7663	0.0035
7664	0.003174
7665	0.002839
7666	0.002785
7667	0.002706
7668	0.002822
7669	0.002865
7670	0.002738
7671	0.002628
7672	0.002547
7673	0.002387
7674	0.002333
7675	0.002474
7676	0.002616
7677	0.002754
7678	0.002709
7679	0.002493
7680	0.00244
7681	0.002629
7682	0.00277
7683	0.002793
7684	0.002752
7685	0.002752
7686	0.002837
7687	0.002959
7688	0.002969
7689	0.003003
7690	0.0031
7691	0.003141
7692	0.003144
7693	0.003036
7694	0.002912
7695	0.002951
7696	0.003198
7697	0.003559
7698	0.003748
7699	0.003609
7700	0.003584
7701	0.003765
7702	0.003706
7703	0.003601
7704	0.003584
7705	0.003563
7706	0.003426
7707	0.003485
7708	0.00372
7709	0.003758
7710	0.00381
7711	0.003782
7712	0.003492
7713	0.003474
7714	0.003357
7715	0.003172
7716	0.003161
7717	0.003481
7718	0.003689
7719	0.003544
7720	0.003416
7721	0.003435
7722	0.003551
7723	0.003676
7724	0.00394
7725	0.003994
7726	0.004051
7727	0.00405
7728	0.003901
7729	0.003749
7730	0.003836
7731	0.004036
7732	0.004271
7733	0.004525
7734	0.004746
7735	0.004805
7736	0.004672
7737	0.004487
7738	0.004435
7739	0.004614
7740	0.004524
7741	0.004444
7742	0.004464
7743	0.004624
7744	0.004863
7745	0.004935
7746	0.004771
7747	0.004521
7748	0.004525
7749	0.004445
7750	0.004256
7751	0.004315
7752	0.00443
7753	0.004301
7754	0.003979
7755	0.003922
7756	0.003831
7757	0.00377
7758	0.00393
7759	0.00407
7760	0.004266
7761	0.004773
7762	0.004833
7763	0.004628
7764	0.004464
7765	0.004477
7766	0.0047
7767	0.004802
7768	0.004519
7769	0.004422
7770	0.004618
7771	0.004815
7772	0.00484
7773	0.004839
7774	0.004941
7775	0.004763
7776	0.004587
7777	0.004537
7778	0.004695
7779	0.004712
7780	0.00465
7781	0.004656
7782	0.004732
7783	0.004799
7784	0.00459
7785	0.004472
7786	0.004462
7787	0.004471
7788	0.004523
7789	0.00464
7790	0.004866
7791	0.00505
7792	0.00529
7793	0.005452
7794	0.005338
7795	0.005095
7796	0.00481
7797	0.004765
7798	0.004728
7799	0.00461
7800	0.004532
7801	0.004804
7802	0.005008
7803	0.005073
7804	0.004936
7805	0.004834
7806	0.004805
7807	0.004758
7808	0.004593
7809	0.00442
7810	0.004592
7811	0.004853
7812	0.004881
7813	0.004576
7814	0.004403
7815	0.004306
7816	0.004099
7817	0.003958
7818	0.004083
7819	0.004355
7820	0.004466
7821	0.004518
7822	0.004448
7823	0.004266
7824	0.004164
7825	0.004153
7826	0.004217
7827	0.004435
7828	0.004849
7829	0.004981
7830	0.005172
7831	0.005299
7832	0.005266
7833	0.005167
7834	0.005225
7835	0.005261
7836	0.005292
7837	0.005366
7838	0.005556
7839	0.005846
7840	0.006055
7841	0.006213
7842	0.006338
7843	0.006225
7844	0.006286
7845	0.006298
7846	0.006017
7847	0.005744
7848	0.00562
7849	0.005606
7850	0.005711
7851	0.00582
7852	0.005713
7853	0.005489
7854	0.00532
7855	0.005247
7856	0.005243
7857	0.005196
7858	0.00522
7859	0.0053
7860	0.005474
7861	0.00555
7862	0.005551
7863	0.005659
7864	0.005687
7865	0.005724
7866	0.005771
7867	0.005544
7868	0.005259
7869	0.00525
7870	0.005301
7871	0.005346
7872	0.005359
7873	0.005377
7874	0.005374
7875	0.005214
7876	0.005006
7877	0.005014
7878	0.004993
7879	0.004974
7880	0.004968
7881	0.005057
7882	0.005345
7883	0.00547
7884	0.005544
7885	0.005632
7886	0.00555
7887	0.005378
7888	0.005336
7889	0.005391
7890	0.005433
7891	0.005484
7892	0.005586
7893	0.005562
7894	0.005443
7895	0.005463
7896	0.00558
7897	0.005598
7898	0.005632
7899	0.005786
7900	0.005855
7901	0.005669
7902	0.00556
7903	0.005537
7904	0.00574
7905	0.006021
7906	0.006122
7907	0.00596
7908	0.005854
7909	0.00578
7910	0.005788
7911	0.005824
7912	0.005803
7913	0.005776
7914	0.005781
7915	0.005683
7916	0.005533
7917	0.005466
7918	0.005488
7919	0.005487
7920	0.005507
7921	0.005511
7922	0.005584
7923	0.005636
7924	0.005763
7925	0.005777
7926	0.005688
7927	0.005351
7928	0.005061
7929	0.004974
7930	0.005034
7931	0.005001
7932	0.004968
7933	0.005
7934	0.005087
7935	0.005093
7936	0.004971
7937	0.004859
7938	0.004793
7939	0.004789
7940	0.004997
7941	0.005116
7942	0.00506
7943	0.005013
7944	0.005138
7945	0.005185
7946	0.005194
7947	0.005126
7948	0.005139
7949	0.005259
7950	0.00544
7951	0.005455
7952	0.005578
7953	0.005592
7954	0.00547
7955	0.005319
7956	0.005163
7957	0.005048
7958	0.004909
7959	0.004859
7960	0.004835
7961	0.004813
7962	0.004848
7963	0.004965
7964	0.005151
7965	0.005261
7966	0.005267
7967	0.005177
7968	0.005135
7969	0.005205
7970	0.005136
7971	0.005017
7972	0.004911
7973	0.004985
7974	0.005026
7975	0.0051
7976	0.005232
7977	0.005298
7978	0.005213
7979	0.005017
7980	0.004961
7981	0.00503
7982	0.005078
7983	0.004986
7984	0.004948
7985	0.004878
7986	0.004852
7987	0.004859
7988	0.004875
7989	0.004848
7990	0.004765
7991	0.004639
7992	0.004519
7993	0.004502
7994	0.004519
7995	0.004438
7996	0.00436
7997	0.004379
7998	0.004401
[truncated: 4,001 more rows]

## Sheet: WT Replicate 5
Time	UV
6000	-0.000172
6001	-0.000175
6002	-0.000163
6003	-0.00017
6004	-0.000176
6005	-0.000184
6006	-0.000206
6007	-0.00024
6008	-0.000319
6009	-0.00032
6010	-0.000266
6011	-0.000231
6012	-0.000193
6013	-0.000182
6014	-0.000214
6015	-0.000215
6016	-0.000214
6017	-0.000179
6018	-0.000194
6019	-0.000224
6020	-0.000252
6021	-0.000268
6022	-0.000298
6023	-0.000284
6024	-0.000248
6025	-0.000268
6026	-0.000293
6027	-0.000293
6028	-0.000302
6029	-0.00031
6030	-0.000283
6031	-0.000304
6032	-0.000324
6033	-0.000353
6034	-0.000357
6035	-0.000321
6036	-0.000309
6037	-0.000285
6038	-0.000233
6039	-0.000201
6040	-0.000228
6041	-0.000287
6042	-0.000313
6043	-0.000319
6044	-0.000307
6045	-0.00035
6046	-0.000346
6047	-0.000338
6048	-0.000347
6049	-0.000381
6050	-0.000385
6051	-0.000396
6052	-0.000386
6053	-0.000378
6054	-0.000339
6055	-0.000319
6056	-0.000307
6057	-0.000314
6058	-0.000325
6059	-0.000348
6060	-0.000357
6061	-0.000346
6062	-0.000332
6063	-0.00032
6064	-0.000342
6065	-0.00034
6066	-0.000341
6067	-0.000346
6068	-0.000347
6069	-0.000295
6070	-0.000257
6071	-0.000231
6072	-0.000244
6073	-0.000297
6074	-0.000295
6075	-0.000282
6076	-0.000293
6077	-0.000292
6078	-0.000302
6079	-0.000358
6080	-0.000378
6081	-0.000341
6082	-0.000326
6083	-0.000368
6084	-0.00037
6085	-0.000358
6086	-0.000347
6087	-0.000362
6088	-0.000364
6089	-0.000357
6090	-0.000342
6091	-0.00035
6092	-0.000351
6093	-0.000372
6094	-0.000401
6095	-0.000413
6096	-0.00044
6097	-0.000462
6098	-0.000451
6099	-0.000452
6100	-0.000462
6101	-0.000483
6102	-0.000485
6103	-0.000503
6104	-0.000517
6105	-0.000528
6106	-0.000489
6107	-0.000437
6108	-0.00044
6109	-0.00047
6110	-0.000451
6111	-0.000404
6112	-0.000373
6113	-0.000338
6114	-0.000313
6115	-0.00035
6116	-0.000351
6117	-0.000296
6118	-0.000232
6119	-0.00027
6120	-0.000294
6121	-0.000305
6122	-0.000359
6123	-0.000367
6124	-0.000322
6125	-0.000304
6126	-0.000307
6127	-0.000296
6128	-0.000292
6129	-0.000273
6130	-0.000294
6131	-0.00031
6132	-0.000317
6133	-0.000342
6134	-0.000367
6135	-0.000386
6136	-0.000378
6137	-0.000376
6138	-0.000394
6139	-0.000423
6140	-0.000445
6141	-0.000455
6142	-0.000504
6143	-0.000506
6144	-0.00047
6145	-0.000433
6146	-0.000414
6147	-0.000393
6148	-0.000342
6149	-0.000303
6150	-0.000287
6151	-0.000325
6152	-0.000379
6153	-0.000387
6154	-0.000387
6155	-0.000404
6156	-0.000399
6157	-0.000402
6158	-0.000406
6159	-0.000434
6160	-0.000381
6161	-0.000353
6162	-0.00037
6163	-0.000377
6164	-0.000331
6165	-0.000334
6166	-0.000378
6167	-0.000423
6168	-0.000428
6169	-0.000428
6170	-0.000407
6171	-0.000399
6172	-0.00039
6173	-0.000369
6174	-0.000358
6175	-0.00036
6176	-0.000326
6177	-0.000277
6178	-0.000297
6179	-0.000339
6180	-0.00036
6181	-0.00038
6182	-0.000411
6183	-0.000424
6184	-0.000426
6185	-0.000422
6186	-0.00041
6187	-0.000418
6188	-0.000443
6189	-0.000478
6190	-0.000484
6191	-0.000484
6192	-0.000468
6193	-0.000474
6194	-0.000488
6195	-0.000484
6196	-0.000437
6197	-0.000369
6198	-0.000321
6199	-0.000311
6200	-0.000339
6201	-0.000365
6202	-0.000401
6203	-0.000404
6204	-0.000396
6205	-0.000385
6206	-0.000384
6207	-0.000377
6208	-0.000375
6209	-0.000376
6210	-0.000385
6211	-0.000385
6212	-0.000399
6213	-0.000382
6214	-0.000328
6215	-0.000283
6216	-0.000284
6217	-0.000322
6218	-0.000333
6219	-0.000323
6220	-0.000307
6221	-0.00036
6222	-0.000395
6223	-0.000391
6224	-0.000342
6225	-0.000288
6226	-0.000294
6227	-0.000322
6228	-0.00032
6229	-0.000296
6230	-0.000286
6231	-0.000274
6232	-0.000279
6233	-0.000271
6234	-0.000268
6235	-0.000283
6236	-0.00031
6237	-0.000292
6238	-0.000245
6239	0
6240	0
6241	1.5e-05
6242	-4e-06
6243	-4e-05
6244	-4.4e-05
6245	-1.6e-05
6246	-2.5e-05
6247	-4.4e-05
6248	-3.6e-05
6249	-1.6e-05
6250	-1.3e-05
6251	-2.8e-05
6252	-2.8e-05
6253	-4.8e-05
6254	-8.7e-05
6255	-9.7e-05
6256	-5.5e-05
6257	-4e-05
6258	-6.9e-05
6259	-9.5e-05
6260	-9.5e-05
6261	-0.000126
6262	-0.000142
6263	-0.00016
6264	-0.000163
6265	-0.000164
6266	-0.000177
6267	-0.000186
6268	-0.000157
6269	-0.000151
6270	-0.000172
6271	-0.000204
6272	-0.000202
6273	-0.000169
6274	-0.000127
6275	-0.000125
6276	-0.000121
6277	-0.000127
6278	-0.000141
6279	-0.000127
6280	-0.0001
6281	-0.000123
6282	-0.000128
6283	-0.000127
6284	-9.9e-05
6285	-9.6e-05
6286	-0.000126
6287	-0.000131
6288	-0.000127
6289	-0.000144
6290	-0.000135
6291	-0.000116
6292	-0.000107
6293	-0.000116
6294	-0.000153
6295	-0.0002
6296	-0.000246
6297	-0.000253
6298	-0.000257
6299	-0.000263
6300	-0.000271
6301	-0.000257
6302	-0.000191
6303	-0.000165
6304	-0.000183
6305	-0.000216
6306	-0.000229
6307	-0.000236
6308	-0.000262
6309	-0.000278
6310	-0.000263
6311	-0.000226
6312	-0.000159
6313	-0.000127
6314	-0.000106
6315	-0.000108
6316	-9.7e-05
6317	-0.000111
6318	-0.000146
6319	-0.000172
6320	-0.000161
6321	-0.000139
6322	-0.000143
6323	-0.000148
6324	-0.000135
6325	-9.8e-05
6326	-9.5e-05
6327	-6.4e-05
6328	-2.5e-05
6329	-2.7e-05
6330	-6.5e-05
6331	-0.000103
6332	-0.000138
6333	-0.000173
6334	-0.000198
6335	-0.000209
6336	-0.000178
6337	-0.000134
6338	-7.5e-05
6339	-5.8e-05
6340	-6e-05
6341	-6.7e-05
6342	-6.3e-05
6343	-6.3e-05
6344	-8.5e-05
6345	-9.6e-05
6346	-8.5e-05
6347	0
6348	2.8e-05
6349	3.9e-05
6350	3e-05
6351	2.1e-05
6352	3.6e-05
6353	5.4e-05
6354	0.000107
6355	0.000144
6356	0.000143
6357	0.00012
6358	0.000111
6359	0.000113
6360	7.4e-05
6361	1.7e-05
6362	3.8e-05
6363	6.5e-05
6364	7e-05
6365	5.6e-05
6366	7.4e-05
6367	0.000114
6368	0.00011
6369	4.8e-05
6370	1.6e-05
6371	3.9e-05
6372	7.6e-05
6373	8.7e-05
6374	9.4e-05
6375	8.8e-05
6376	5.3e-05
6377	4.5e-05
6378	4.7e-05
6379	4.6e-05
6380	2.8e-05
6381	3.1e-05
6382	3.2e-05
6383	6e-06
6384	1e-05
6385	2.9e-05
6386	6.8e-05
6387	8.7e-05
6388	7.2e-05
6389	4.1e-05
6390	5.1e-05
6391	3.3e-05
6392	-1.9e-05
6393	-5.7e-05
6394	-6.2e-05
6395	-8.3e-05
6396	-0.000117
6397	-0.000127
6398	-0.000107
6399	-0.000116
6400	-8.6e-05
6401	-6.1e-05
6402	-8e-05
6403	-0.00012
6404	-0.000127
6405	-0.000115
6406	-9.8e-05
6407	-8.3e-05
6408	-8.4e-05
6409	-9.2e-05
6410	-0.000111
6411	-0.00013
6412	-7.6e-05
6413	-4.7e-05
6414	1e-05
6415	-1.1e-05
6416	-4.7e-05
6417	-7e-05
6418	-4.3e-05
6419	-3e-06
6420	8e-06
6421	-2e-06
6422	1e-05
6423	-1.7e-05
6424	-4.8e-05
6425	-6.4e-05
6426	-7.7e-05
6427	-5e-05
6428	-2.1e-05
6429	-5.1e-05
6430	-0.0001
6431	-0.00013
6432	-0.000117
6433	-7.8e-05
6434	-5.6e-05
6435	-5.2e-05
6436	-6e-05
6437	-5.9e-05
6438	-4.1e-05
6439	-6.4e-05
6440	-0.000165
6441	-0.000238
6442	-0.000253
6443	-0.000239
6444	-0.000277
6445	-0.000289
6446	-0.000276
6447	-0.000302
6448	-0.000376
6449	-0.000439
6450	-0.000412
6451	-0.000361
6452	-0.000322
6453	-0.00035
6454	-0.000356
6455	-0.000389
6456	-0.00034
6457	-0.000312
6458	-0.000315
6459	-0.00034
6460	-0.000328
6461	-0.000341
6462	-0.000365
6463	-0.000375
6464	-0.000382
6465	-0.000377
6466	-0.000375
6467	-0.000397
6468	-0.00039
6469	-0.000355
6470	-0.000314
6471	-0.000339
6472	-0.000376
6473	-0.000385
6474	-0.000353
6475	-0.000319
6476	-0.000272
6477	-0.000268
6478	-0.00028
6479	-0.000293
6480	-0.000262
6481	-0.000259
6482	-0.000319
6483	-0.000398
6484	-0.000427
6485	-0.00043
6486	-0.000438
6487	-0.000487
6488	-0.000504
6489	-0.000514
6490	-0.000551
6491	-0.000555
6492	-0.000529
6493	-0.000513
6494	-0.000542
6495	-0.000553
6496	-0.000538
6497	-0.000509
6498	-0.000508
6499	-0.000499
6500	-0.000497
6501	-0.000481
6502	-0.000506
6503	-0.000517
6504	-0.000524
6505	-0.000505
6506	-0.000482
6507	-0.000435
6508	-0.000393
6509	-0.000389
6510	-0.000469
6511	-0.000501
6512	-0.000496
6513	-0.0005
6514	-0.000538
6515	-0.000539
6516	-0.000513
6517	-0.000478
6518	-0.000447
6519	-0.000436
6520	-0.000451
6521	-0.000464
6522	-0.000481
6523	-0.000477
6524	-0.000502
6525	-0.000514
6526	-0.000518
6527	-0.0005
6528	-0.00049
6529	-0.000471
6530	-0.000457
6531	-0.00045
6532	-0.000477
6533	-0.000473
6534	-0.000457
6535	-0.000472
6536	-0.00048
6537	-0.000472
6538	-0.000465
6539	-0.000423
6540	-0.000432
6541	-0.000493
6542	-0.000468
6543	-0.000397
6544	-0.00037
6545	-0.000428
6546	-0.000465
6547	-0.000489
6548	-0.000489
6549	-0.000488
6550	-0.000456
6551	-0.000393
6552	-0.000319
6553	-0.000311
6554	-0.000352
6555	-0.000371
6556	-0.000395
6557	-0.00041
6558	-0.000412
6559	-0.000397
6560	-0.000383
6561	-0.000376
6562	-0.000357
6563	-0.000332
6564	-0.000327
6565	-0.000302
6566	-0.000352
6567	-0.000393
6568	-0.000393
6569	-0.000363
6570	-0.000362
6571	-0.000374
6572	-0.000383
6573	-0.000383
6574	-0.000381
6575	-0.000343
6576	-0.000339
6577	-0.000371
6578	-0.000358
6579	-0.00031
6580	-0.000338
6581	-0.000374
6582	-0.000406
6583	-0.000404
6584	-0.000395
6585	-0.00035
6586	-0.000361
6587	-0.000402
6588	-0.000348
6589	-0.000315
6590	-0.000355
6591	-0.000386
6592	-0.000382
6593	-0.000356
6594	-0.000389
6595	-0.000434
6596	-0.000411
6597	-0.000394
6598	-0.000408
6599	-0.000414
6600	-0.000436
6601	-0.000436
6602	-0.00043
6603	-0.000395
6604	-0.000393
6605	-0.000413
6606	-0.000402
6607	-0.000363
6608	-0.000378
6609	-0.000449
6610	-0.00048
6611	-0.000424
6612	-0.000392
6613	-0.000411
6614	-0.000453
6615	-0.000468
6616	-0.00046
6617	-0.000431
6618	-0.000427
6619	-0.000413
6620	-0.000406
6621	-0.000464
6622	-0.000497
6623	-0.000507
6624	-0.000451
6625	-0.00039
6626	-0.000441
6627	-0.000541
6628	-0.000556
6629	-0.000545
6630	-0.000566
6631	-0.00059
6632	-0.000605
6633	-0.000603
6634	-0.000567
6635	-0.000496
6636	-0.000495
6637	-0.000543
6638	-0.000544
6639	-0.000535
6640	-0.000521
6641	-0.000495
6642	-0.000517
6643	-0.000549
6644	-0.000582
6645	-0.000536
6646	-0.000473
6647	-0.000418
6648	-0.000417
6649	-0.000468
6650	-0.000475
6651	-0.00044
6652	-0.000438
6653	-0.000429
6654	-0.000426
6655	-0.000442
6656	-0.000486
6657	-0.000505
6658	-0.000498
6659	-0.000527
6660	-0.000542
6661	-0.000523
6662	-0.000458
6663	-0.000421
6664	-0.000398
6665	-0.000377
6666	-0.000396
6667	-0.000431
6668	-0.000457
6669	-0.000454
6670	-0.000482
6671	-0.000508
6672	-0.000489
6673	-0.000465
6674	-0.000491
6675	-0.000493
6676	-0.00047
6677	-0.000408
6678	-0.000388
6679	-0.000415
6680	-0.000475
6681	-0.000515
6682	-0.00052
6683	-0.000497
6684	-0.000477
6685	-0.000498
6686	-0.000499
6687	-0.000472
6688	-0.000487
6689	-0.000541
6690	-0.000574
6691	-0.000564
6692	-0.000561
6693	-0.00061
6694	-0.000644
6695	-0.000607
6696	-0.000619
6697	-0.000633
6698	-0.000625
6699	-0.000603
6700	-0.000603
6701	-0.000639
6702	-0.000651
6703	-0.000619
6704	-0.000569
6705	-0.000567
6706	-0.00059
6707	-0.000597
6708	-0.000555
6709	-0.00053
6710	-0.000518
6711	-0.00051
6712	-0.000501
6713	-0.000554
6714	-0.000594
6715	-0.000622
6716	-0.000642
6717	-0.000671
6718	-0.000745
6719	-0.00073
6720	-0.000691
6721	-0.000668
6722	-0.0007
6723	-0.000735
6724	-0.000761
6725	-0.00076
6726	-0.00078
6727	-0.000769
6728	-0.000765
6729	-0.000756
6730	-0.000736
6731	-0.000706
6732	-0.000714
6733	-0.000791
6734	-0.000793
6735	-0.000735
6736	-0.000716
6737	-0.00073
6738	-0.000756
6739	-0.000773
6740	-0.000766
6741	-0.000742
6742	-0.000716
6743	-0.000714
6744	-0.000731
6745	-0.000743
6746	-0.000776
6747	-0.000796
6748	-0.000801
6749	-0.000803
6750	-0.000771
6751	-0.000746
6752	-0.000763
6753	-0.000756
6754	-0.000737
6755	-0.000749
6756	-0.000756
6757	-0.000732
6758	-0.000724
6759	-0.000715
6760	-0.000696
6761	-0.000732
6762	-0.000754
6763	-0.000762
6764	-0.000773
6765	-0.000822
6766	-0.000812
6767	-0.000814
6768	-0.000815
6769	-0.000816
6770	-0.000852
6771	-0.000827
6772	-0.000788
6773	-0.000781
6774	-0.000826
6775	-0.000846
6776	-0.000822
6777	-0.00081
6778	-0.000814
6779	-0.000837
6780	-0.000849
6781	-0.000892
6782	-0.000952
6783	-0.000976
6784	-0.000966
6785	-0.000902
6786	-0.000848
6787	-0.000841
6788	-0.000839
6789	-0.000841
6790	-0.000819
6791	-0.000801
6792	-0.000838
6793	-0.000893
6794	-0.000928
6795	-0.00094
6796	-0.00095
6797	-0.000942
6798	-0.000938
6799	-0.000909
6800	-0.000891
6801	-0.000864
6802	-0.00086
6803	-0.00087
6804	-0.000889
6805	-0.00086
6806	-0.000827
6807	-0.000824
6808	-0.000833
6809	-0.000843
6810	-0.000856
6811	-0.000874
6812	-0.000824
6813	-0.000803
6814	-0.000847
6815	-0.000877
6816	-0.000894
6817	-0.000877
6818	-0.000844
6819	-0.000863
6820	-0.000892
6821	-0.000875
6822	-0.000845
6823	-0.000835
6824	-0.000867
6825	-0.000853
6826	-0.000886
6827	-0.00092
6828	-0.000948
6829	-0.00095
6830	-0.000926
6831	-0.000846
6832	-0.000814
6833	-0.000808
6834	-0.000834
6835	-0.000848
6836	-0.000871
6837	-0.00086
6838	-0.000821
6839	-0.00085
6840	-0.000878
6841	-0.000898
6842	-0.000866
6843	-0.000851
6844	-0.000863
6845	-0.000895
6846	-0.000872
6847	-0.000809
6848	-0.000756
6849	-0.000784
6850	-0.000854
6851	-0.000876
6852	-0.000871
6853	-0.000873
6854	-0.000885
6855	-0.000904
6856	-0.000944
6857	-0.000975
6858	-0.00094
6859	-0.000897
6860	-0.000898
6861	-0.000904
6862	-0.000922
6863	-0.000925
6864	-0.000915
6865	-0.00086
6866	-0.000805
6867	-0.000776
6868	-0.000759
6869	-0.000755
6870	-0.000753
6871	-0.000745
6872	-0.000718
6873	-0.00069
6874	-0.000697
6875	-0.000738
6876	-0.000807
6877	-0.000835
6878	-0.000798
6879	-0.000755
6880	-0.000763
6881	-0.00078
6882	-0.000793
6883	-0.00082
6884	-0.000814
6885	-0.000739
6886	-0.000698
6887	-0.000667
6888	-0.000712
6889	-0.000728
6890	-0.000694
6891	-0.00066
6892	-0.000648
6893	-0.000618
6894	-0.000616
6895	-0.000645
6896	-0.000663
6897	-0.000666
6898	-0.000726
6899	-0.000817
6900	-0.000851
6901	-0.000829
6902	-0.000825
6903	-0.000824
6904	-0.000819
6905	-0.000811
6906	-0.000793
6907	-0.000758
6908	-0.000723
6909	-0.000681
6910	-0.000591
6911	-0.000518
6912	-0.00051
6913	-0.000539
6914	-0.000607
6915	-0.000644
6916	-0.000656
6917	-0.000635
6918	-0.00064
6919	-0.000684
6920	-0.000693
6921	-0.000669
6922	-0.000693
6923	-0.000677
6924	-0.000632
6925	-0.000639
6926	-0.000642
6927	-0.000625
6928	-0.000643
6929	-0.000655
6930	-0.000677
6931	-0.000637
6932	-0.000629
6933	-0.00064
6934	-0.000654
6935	-0.000654
6936	-0.000666
6937	-0.00071
6938	-0.000718
6939	-0.000715
6940	-0.000694
6941	-0.000642
6942	-0.000643
6943	-0.000671
6944	-0.00067
6945	-0.000664
6946	-0.000649
6947	-0.00063
6948	-0.000622
6949	-0.000613
6950	-0.000607
6951	-0.000605
6952	-0.000613
6953	-0.00061
6954	-0.000606
6955	-0.000612
6956	-0.000654
6957	-0.000659
6958	-0.000645
6959	-0.000636
6960	-0.000663
6961	-0.000693
6962	-0.000687
6963	-0.000678
6964	-0.000723
6965	-0.000766
6966	-0.000793
6967	-0.000801
6968	-0.000788
6969	-0.000722
6970	-0.000683
6971	-0.000661
6972	-0.000644
6973	-0.000664
6974	-0.000689
6975	-0.000674
6976	-0.000674
6977	-0.000697
6978	-0.000687
6979	-0.000672
6980	-0.000691
6981	-0.000732
6982	-0.000726
6983	-0.000682
6984	-0.00063
6985	-0.000571
6986	-0.000513
6987	-0.000504
6988	-0.000511
6989	-0.000542
6990	-0.000565
6991	-0.00054
6992	-0.000534
6993	-0.000518
6994	-0.000505
6995	-0.000472
6996	-0.000475
6997	-0.000496
6998	-0.000505
6999	-0.000491
7000	-0.000486
7001	-0.000534
7002	-0.000567
7003	-0.000529
7004	-0.000471
7005	-0.000471
7006	-0.000441
7007	-0.00042
7008	-0.000408
7009	-0.000405
7010	-0.00042
7011	-0.000459
7012	-0.000454
7013	-0.00048
7014	-0.000509
7015	-0.000542
7016	-0.000557
7017	-0.000532
7018	-0.000508
7019	-0.000527
7020	-0.000556
7021	-0.000545
7022	-0.000513
7023	-0.000507
7024	-0.000509
7025	-0.000546
7026	-0.0006
7027	-0.000581
7028	-0.000499
7029	-0.000462
7030	-0.000505
7031	-0.000579
7032	-0.000589
7033	-0.000566
7034	-0.000517
7035	-0.000473
7036	-0.000463
7037	-0.000494
7038	-0.000532
7039	-0.000524
7040	-0.000536
7041	-0.000545
7042	-0.000513
7043	-0.000481
7044	-0.000512
7045	-0.00056
7046	-0.000644
7047	-0.000654
7048	-0.000625
7049	-0.000595
7050	-0.000566
7051	-0.000547
7052	-0.000542
7053	-0.000478
7054	-0.000467
7055	-0.000531
7056	-0.00057
7057	-0.000545
7058	-0.000547
7059	-0.000523
7060	-0.000501
7061	-0.000506
7062	-0.000525
7063	-0.000528
7064	-0.000515
7065	-0.000506
7066	-0.000509
7067	-0.000507
7068	-0.000484
7069	-0.000488
7070	-0.000535
7071	-0.000562
7072	-0.00053
7073	-0.000515
7074	-0.000532
7075	-0.000561
7076	-0.00055
7077	-0.000559
7078	-0.000568
7079	-0.000584
7080	-0.000575
7081	-0.000538
7082	-0.00051
7083	-0.0005
7084	-0.000509
7085	-0.000515
7086	-0.000522
7087	-0.000495
7088	-0.000459
7089	-0.000486
7090	-0.000537
7091	-0.000587
7092	-0.000614
7093	-0.000614
7094	-0.000592
7095	-0.000563
7096	-0.000568
7097	-0.000571
7098	-0.000552
7099	-0.000517
7100	-0.000517
7101	-0.000528
7102	-0.000508
7103	-0.000469
7104	-0.000457
7105	-0.000484
7106	-0.000486
7107	-0.000463
7108	-0.000474
7109	-0.00049
7110	-0.000512
7111	-0.000505
7112	-0.000452
7113	-0.00043
7114	-0.000423
7115	-0.000398
7116	-0.000417
7117	-0.00046
7118	-0.000503
7119	-0.000492
7120	-0.000485
7121	-0.000489
7122	-0.000503
7123	-0.000525
7124	-0.000544
7125	-0.000523
7126	-0.000456
7127	-0.000416
7128	-0.000426
7129	-0.000447
7130	-0.000455
7131	-0.000479
7132	-0.000469
7133	-0.000433
7134	-0.000403
7135	-0.000435
7136	-0.000494
7137	-0.000529
7138	-0.000539
7139	-0.000541
7140	-0.000549
7141	-0.000548
7142	-0.000561
7143	-0.000534
7144	-0.000491
7145	-0.00045
7146	-0.000433
7147	-0.000457
7148	-0.000501
7149	-0.000524
7150	-0.000516
7151	-0.000502
7152	-0.000501
7153	-0.000512
7154	-0.000543
7155	-0.00053
7156	-0.000516
7157	-0.0005
7158	-0.000518
7159	-0.000539
7160	-0.000537
7161	-0.000517
7162	-0.000491
7163	-0.00048
7164	-0.000473
7165	-0.000464
7166	-0.000459
7167	-0.000474
7168	-0.000457
7169	-0.000445
7170	-0.000445
7171	-0.000469
7172	-0.000488
7173	-0.000494
7174	-0.000494
7175	-0.000481
7176	-0.000483
7177	-0.000507
7178	-0.000521
7179	-0.000513
7180	-0.000479
7181	-0.000439
7182	-0.000409
7183	-0.000435
7184	-0.000435
7185	-0.000418
7186	-0.00044
7187	-0.000451
7188	-0.00047
7189	-0.000499
7190	-0.000525
7191	-0.000563
7192	-0.00057
7193	-0.000636
7194	-0.000662
7195	-0.000648
7196	-0.000599
7197	-0.000558
7198	-0.000546
7199	-0.000565
7200	-0.000574
7201	-0.000593
7202	-0.000602
7203	-0.000584
7204	-0.000544
7205	-0.000537
7206	-0.000544
7207	-0.000567
7208	-0.000594
7209	-0.000598
7210	-0.000611
7211	-0.000609
7212	-0.000571
7213	-0.000572
7214	-0.000583
7215	-0.000563
7216	-0.00055
7217	-0.000542
7218	-0.00049
7219	-0.000451
7220	-0.000454
7221	-0.000457
7222	-0.00048
7223	-0.000539
7224	-0.00057
7225	-0.000517
7226	-0.000487
7227	-0.000482
7228	-0.000507
7229	-0.000557
7230	-0.000546
7231	-0.000495
7232	-0.000493
7233	-0.00052
7234	-0.000523
7235	-0.000555
7236	-0.000576
7237	-0.00058
7238	-0.000559
7239	-0.000547
7240	-0.000517
7241	-0.000476
7242	-0.000472
7243	-0.000506
7244	-0.000552
7245	-0.000555
7246	-0.000604
7247	-0.000624
7248	-0.000605
7249	-0.000564
7250	-0.00053
7251	-0.00047
7252	-0.000413
7253	-0.000412
7254	-0.000408
7255	-0.000452
7256	-0.000519
7257	-0.000545
7258	-0.000537
7259	-0.000529
7260	-0.000527
7261	-0.000538
7262	-0.000533
7263	-0.000475
7264	-0.00042
7265	-0.000438
7266	-0.000481
7267	-0.000495
7268	-0.000461
7269	-0.00041
7270	-0.000414
7271	-0.000467
7272	-0.00048
7273	-0.000483
7274	-0.000464
7275	-0.000471
7276	-0.000469
7277	-0.0004
7278	-0.000388
7279	-0.000427
7280	-0.000484
7281	-0.000532
7282	-0.000548
7283	-0.000537
7284	-0.00052
7285	-0.00047
7286	-0.00042
7287	-0.000429
7288	-0.000431
7289	-0.000481
7290	-0.000511
7291	-0.000503
7292	-0.00049
7293	-0.000468
7294	-0.00045
7295	-0.000392
7296	-0.000378
7297	-0.000362
7298	-0.00035
7299	-0.000344
7300	-0.000366
7301	-0.000368
7302	-0.00037
7303	-0.000385
7304	-0.000371
7305	-0.000407
7306	-0.000398
7307	-0.000375
7308	-0.00038
7309	-0.00039
7310	-0.000378
7311	-0.000336
7312	-0.00032
7313	-0.000274
7314	-0.00023
7315	-0.000258
7316	-0.000245
7317	-0.000235
7318	-0.000264
7319	-0.000342
7320	-0.000391
7321	-0.000372
7322	-0.000359
7323	-0.000402
7324	-0.000464
7325	-0.000443
7326	-0.000435
7327	-0.00041
7328	-0.000402
7329	-0.000424
7330	-0.000447
7331	-0.000434
7332	-0.000398
7333	-0.000391
7334	-0.00039
7335	-0.000377
7336	-0.000353
7337	-0.000335
7338	-0.000319
7339	-0.000315
7340	-0.000346
7341	-0.000368
7342	-0.000361
7343	-0.000362
7344	-0.000378
7345	-0.000396
7346	-0.000356
7347	-0.000319
7348	-0.000308
7349	-0.000345
7350	-0.0004
7351	-0.000462
7352	-0.000463
7353	-0.000425
7354	-0.000405
7355	-0.000392
7356	-0.000378
7357	-0.000383
7358	-0.000379
7359	-0.000374
7360	-0.000388
7361	-0.000403
7362	-0.000362
7363	-0.000353
7364	-0.000402
7365	-0.000447
7366	-0.000464
7367	-0.00043
7368	-0.000346
7369	-0.00028
7370	-0.000283
7371	-0.000271
7372	-0.00028
7373	-0.000251
7374	-0.000259
7375	-0.000286
7376	-0.000324
7377	-0.000345
7378	-0.000356
7379	-0.000364
7380	-0.000385
7381	-0.000388
7382	-0.000382
7383	-0.000368
7384	-0.000371
7385	-0.000347
7386	-0.000341
7387	-0.000369
7388	-0.000371
7389	-0.00035
7390	-0.000336
7391	-0.000311
7392	-0.000278
7393	-0.000293
7394	-0.000341
7395	-0.000354
7396	-0.000368
7397	-0.000392
7398	-0.000411
7399	-0.000415
7400	-0.000408
7401	-0.000439
7402	-0.000473
7403	-0.000448
7404	-0.000414
7405	-0.000404
7406	-0.000419
7407	-0.000465
7408	-0.000468
7409	-0.00046
7410	-0.000496
7411	-0.000529
7412	-0.000494
7413	-0.000445
7414	-0.000439
7415	-0.000446
7416	-0.00045
7417	-0.000492
7418	-0.000487
7419	-0.000451
7420	-0.000438
7421	-0.00043
7422	-0.000399
7423	-0.000392
7424	-0.000414
7425	-0.000445
7426	-0.000465
7427	-0.000478
7428	-0.00045
7429	-0.000414
7430	-0.00035
7431	-0.000356
7432	-0.000353
7433	-0.000353
7434	-0.000338
7435	-0.000361
7436	-0.000387
7437	-0.000378
7438	-0.000347
7439	-0.000312
7440	-0.000256
7441	-0.000256
7442	-0.000295
7443	-0.000349
7444	-0.000355
7445	-0.000353
7446	-0.000378
7447	-0.000402
7448	-0.000407
7449	-0.000397
7450	-0.000374
7451	-0.000363
7452	-0.000366
7453	-0.000337
7454	-0.000273
7455	-0.00023
7456	-0.000252
7457	-0.000277
7458	-0.000286
7459	-0.000277
7460	-0.000246
7461	-0.000217
7462	-0.000216
7463	-0.000189
7464	-0.000177
7465	-0.000219
7466	-0.000235
7467	-0.000198
7468	-0.000193
7469	-0.000149
7470	-8.4e-05
7471	-4.6e-05
7472	-0.000103
7473	-0.000177
7474	-0.000169
7475	-0.000168
7476	-0.000179
7477	-0.000171
7478	-0.000167
7479	-0.000142
7480	-0.000146
7481	-0.000167
7482	-0.000164
7483	-0.00018
7484	-0.000189
7485	-0.000159
7486	-0.000137
7487	-0.000152
7488	-0.000163
7489	-0.000162
7490	-0.000164
7491	-0.000193
7492	-0.000224
7493	-0.000248
7494	-0.000247
7495	-0.000274
7496	-0.000268
7497	-0.000231
7498	-0.000214
7499	-0.000231
7500	-0.000256
7501	-0.000286
7502	-0.000242
7503	-0.00018
7504	-0.000183
7505	-0.000242
7506	-0.000306
7507	-0.000382
7508	-0.000432
7509	-0.000419
7510	-0.000377
7511	-0.000378
7512	-0.000377
7513	-0.000384
7514	-0.000325
7515	-0.000229
7516	-0.000171
7517	-0.000166
7518	-0.000155
7519	-0.000118
7520	-0.000109
7521	-0.000154
7522	-0.000228
7523	-0.000278
7524	-0.000308
7525	-0.000284
7526	-0.000316
7527	-0.000338
7528	-0.000344
7529	-0.00034
7530	-0.000318
7531	-0.000278
7532	-0.000253
7533	-0.000226
7534	-0.000226
7535	-0.000211
7536	-0.000191
7537	-0.000195
7538	-0.000212
7539	-0.000227
7540	-0.000185
7541	-0.000151
7542	-0.000179
7543	-0.000206
7544	-0.000196
7545	-0.000189
7546	-0.00018
7547	-0.000217
7548	-0.000253
7549	-0.000237
7550	-0.000206
7551	-0.00017
7552	-0.000165
7553	-0.000193
7554	-0.000195
7555	-0.000175
7556	-0.000187
7557	-0.000189
7558	-0.000177
7559	-0.000144
7560	-0.000116
7561	-0.00012
7562	-0.000129
7563	-9.1e-05
7564	-6.5e-05
7565	-7e-05
7566	-0.0001
7567	-9.8e-05
7568	-7.7e-05
7569	-7.2e-05
7570	-3.3e-05
7571	-1.2e-05
7572	-4.2e-05
7573	-9.2e-05
7574	-0.000141
7575	-0.000155
7576	-0.000213
7577	-0.000279
7578	-0.000292
7579	-0.000286
7580	-0.000233
7581	-0.000181
7582	-0.000175
7583	-0.000143
7584	-0.000122
7585	-0.000112
7586	-0.000107
7587	-8.1e-05
7588	-5.2e-05
7589	-2.9e-05
7590	-2.6e-05
7591	-4.9e-05
7592	-7e-05
7593	-7.3e-05
7594	-8.7e-05
7595	-0.000142
7596	-0.000157
7597	-0.000116
7598	-9.4e-05
7599	-0.000123
7600	-0.000156
7601	-0.000188
7602	-0.000186
7603	-0.000192
7604	-0.000197
7605	-0.000219
7606	-0.000228
7607	-0.000194
7608	-0.000148
7609	-0.000124
7610	-0.000129
7611	-0.000143
7612	-0.000109
7613	-0.000106
7614	-0.000101
7615	-0.000104
7616	-0.000136
7617	-0.000219
7618	-0.000208
7619	-0.000204
7620	-0.000202
7621	-0.000204
7622	-0.000222
7623	-0.000248
7624	-0.000252
7625	-0.000249
7626	-0.000285
7627	-0.0003
7628	-0.00028
7629	-0.000266
7630	-0.000262
7631	-0.000299
7632	-0.000323
7633	-0.000285
7634	-0.000254
7635	-0.000267
7636	-0.000265
7637	-0.000223
7638	-0.000232
7639	-0.000279
7640	-0.00032
7641	-0.000301
7642	-0.000308
7643	-0.000352
7644	-0.000353
7645	-0.00033
7646	-0.000272
7647	-0.000217
7648	-0.000203
7649	-0.000171
7650	-0.000154
7651	-0.000172
7652	-0.000229
7653	-0.000258
7654	-0.000296
7655	-0.000326
7656	-0.000349
7657	-0.00033
7658	-0.000313
7659	-0.000284
7660	-0.000235
7661	-0.00023
7662	-0.000258
7663	-0.000267
7664	-0.000241
7665	-0.000207
7666	-0.000255
7667	-0.000301
7668	-0.000309
7669	-0.000287
7670	-0.000308
7671	-0.000319
7672	-0.000319
7673	-0.00031
7674	-0.000377
7675	-0.000399
7676	-0.000364
7677	-0.000286
7678	-0.000217
7679	-0.000229
7680	-0.000298
7681	-0.00035
7682	-0.000353
7683	-0.000312
7684	-0.000283
7685	-0.000308
7686	-0.000334
7687	-0.00033
7688	-0.000297
7689	-0.000275
7690	-0.000314
7691	-0.000392
7692	-0.000472
7693	-0.000458
7694	-0.000393
7695	-0.000362
7696	-0.00033
7697	-0.000338
7698	-0.000328
7699	-0.000319
7700	-0.00031
7701	-0.000335
7702	-0.000336
7703	-0.00037
7704	-0.000406
7705	-0.000395
7706	-0.000359
7707	-0.000358
7708	-0.000326
7709	-0.00031
7710	-0.000317
7711	-0.000331
7712	-0.000365
7713	-0.000391
7714	-0.000416
7715	-0.000431
7716	-0.000442
7717	-0.000442
7718	-0.000452
7719	-0.000461
7720	-0.00047
7721	-0.000474
7722	-0.000468
7723	-0.000457
7724	-0.000453
7725	-0.000461
7726	-0.000446
7727	-0.000437
7728	-0.000429
7729	-0.00041
7730	-0.000372
7731	-0.000372
7732	-0.000386
7733	-0.000423
7734	-0.000404
7735	-0.000353
7736	-0.000371
7737	-0.000373
7738	-0.000319
7739	-0.000261
7740	-0.000261
7741	-0.000247
7742	-0.000226
7743	-0.000205
7744	-0.0002
7745	-0.000189
7746	-0.000196
7747	-0.0002
7748	-0.000211
7749	-0.000234
7750	-0.000236
7751	-0.000219
7752	-0.000192
7753	-0.000168
7754	-0.00018
7755	-0.000193
7756	-0.00022
7757	-0.000255
7758	-0.00026
7759	-0.000252
7760	-0.000242
7761	-0.000305
7762	-0.000356
7763	-0.000372
7764	-0.000319
7765	-0.000282
7766	-0.000274
7767	-0.000259
7768	-0.000234
7769	-0.000203
7770	-0.000206
7771	-0.000184
7772	-0.000171
7773	-0.000145
7774	-0.000149
7775	-0.000172
7776	-0.000174
7777	-0.000224
7778	-0.000211
7779	-0.000194
7780	-0.000202
7781	-0.000235
7782	-0.000245
7783	-0.000229
7784	-0.000221
7785	-0.000224
7786	-0.000189
7787	-0.000191
7788	-0.000169
7789	-0.000149
7790	-0.000132
7791	-0.000134
7792	-0.000133
7793	-0.000134
7794	-0.000142
7795	-0.000169
7796	-0.000137
7797	-0.00014
7798	-0.000177
7799	-0.000215
7800	-0.000203
7801	-0.000172
7802	-0.000135
7803	-0.000121
7804	-0.000141
7805	-0.000179
7806	-0.00019
7807	-0.000192
7808	-0.000186
7809	-0.000244
7810	-0.000295
7811	-0.000288
7812	-0.000238
7813	-0.000224
7814	-0.000201
7815	-0.00017
7816	-0.000139
7817	-0.000131
7818	-0.000151
7819	-0.000173
7820	-0.000154
7821	-0.000161
7822	-0.000136
7823	-0.000129
7824	-0.000152
7825	-0.000178
7826	-0.000213
7827	-0.000241
7828	-0.000222
7829	-0.000206
7830	-0.000187
7831	-0.000158
7832	-0.000155
7833	-0.000167
7834	-0.00016
7835	-0.00015
7836	-0.000153
7837	-0.000217
7838	-0.000248
7839	-0.000255
7840	-0.000288
7841	-0.000321
7842	-0.000288
7843	-0.000216
7844	-0.000203
7845	-0.00024
7846	-0.00024
7847	-0.000218
7848	-0.000209
7849	-0.000227
7850	-0.000234
7851	-0.000218
7852	-0.000222
7853	-0.000254
7854	-0.000239
7855	-0.000211
7856	-0.000223
7857	-0.000221
7858	-0.000207
7859	-0.000182
7860	-0.000192
7861	-0.000228
7862	-0.00026
7863	-0.000279
7864	-0.000245
7865	-0.000223
7866	-0.00021
7867	-0.000211
7868	-0.000207
7869	-0.000197
7870	-0.000212
7871	-0.000224
7872	-0.000225
7873	-0.000221
7874	-0.000237
7875	-0.000245
7876	-0.000262
7877	-0.000252
7878	-0.000267
7879	-0.000258
7880	-0.000246
7881	-0.000215
7882	-0.000173
7883	-0.000172
7884	-0.000233
7885	-0.000308
7886	-0.000347
7887	-0.000373
7888	-0.000361
7889	-0.00036
7890	-0.000354
7891	-0.000384
7892	-0.00038
7893	-0.000349
7894	-0.000298
7895	-0.000258
7896	-0.000232
7897	-0.000202
7898	-0.000159
7899	-0.000126
7900	-0.000114
7901	-9.8e-05
7902	-0.000107
7903	-0.000123
7904	-0.000161
7905	-0.000196
7906	-0.000187
7907	-0.000179
7908	-0.000209
7909	-0.000245
7910	-0.000278
7911	-0.000305
7912	-0.000358
7913	-0.000366
7914	-0.000359
7915	-0.000344
7916	-0.000323
7917	-0.000279
7918	-0.000246
7919	-0.000231
7920	-0.000278
7921	-0.00032
7922	-0.000348
7923	-0.00035
7924	-0.000322
7925	-0.000295
7926	-0.000298
7927	-0.000317
7928	-0.000318
7929	-0.000315
7930	-0.000365
7931	-0.000422
7932	-0.000438
7933	-0.000438
7934	-0.000441
7935	-0.000451
7936	-0.000439
7937	-0.000397
7938	-0.000336
7939	-0.000319
7940	-0.000318
7941	-0.000332
7942	-0.000343
7943	-0.000361
7944	-0.000337
7945	-0.000303
7946	-0.00028
7947	-0.000252
7948	-0.000241
7949	-0.00027
7950	-0.000276
7951	-0.000287
7952	-0.000257
7953	-0.000251
7954	-0.000248
7955	-0.00025
7956	-0.000245
7957	-0.000248
7958	-0.000272
7959	-0.000312
7960	-0.000302
7961	-0.000241
7962	-0.0002
7963	-0.000213
7964	-0.000216
7965	-0.000205
7966	-0.00023
7967	-0.000282
7968	-0.000308
7969	-0.00031
7970	-0.000336
7971	-0.000335
7972	-0.000337
7973	-0.000341
7974	-0.000356
7975	-0.000367
7976	-0.000344
7977	-0.000331
7978	-0.000331
7979	-0.000336
7980	-0.000337
7981	-0.000314
7982	-0.000306
7983	-0.000308
7984	-0.000291
7985	-0.000279
7986	-0.000279
7987	-0.000314
7988	-0.000341
7989	-0.000329
7990	-0.000336
7991	-0.000335
7992	-0.000334
7993	-0.000358
7994	-0.000399
7995	-0.000391
7996	-0.000371
7997	-0.000405
7998	-0.000436
[truncated: 3,401 more rows]
