# Supplementary material for: Homo-oligomerization of the human adenosine A2A receptor is driven by the intrinsically disordered C-terminus
Source: eLife. 2021 Jul 16;10:e66662. doi: 10.7554/eLife.66662 (PMC8328514; doi:10.7554/eLife.66662)
Supplement: Figure 2—source data 5. [file elife-66662-fig2-data5.xlsx]

## Sheet: WT
Time	UV
6000	-0.000172
6001	-0.000175
6002	-0.000163
6003	-0.00017
6004	-0.000176
6005	-0.000184
6006	-0.000206
6007	-0.00024
6008	-0.000319
6009	-0.00032
6010	-0.000266
6011	-0.000231
6012	-0.000193
6013	-0.000182
6014	-0.000214
6015	-0.000215
6016	-0.000214
6017	-0.000179
6018	-0.000194
6019	-0.000224
6020	-0.000252
6021	-0.000268
6022	-0.000298
6023	-0.000284
6024	-0.000248
6025	-0.000268
6026	-0.000293
6027	-0.000293
6028	-0.000302
6029	-0.00031
6030	-0.000283
6031	-0.000304
6032	-0.000324
6033	-0.000353
6034	-0.000357
6035	-0.000321
6036	-0.000309
6037	-0.000285
6038	-0.000233
6039	-0.000201
6040	-0.000228
6041	-0.000287
6042	-0.000313
6043	-0.000319
6044	-0.000307
6045	-0.00035
6046	-0.000346
6047	-0.000338
6048	-0.000347
6049	-0.000381
6050	-0.000385
6051	-0.000396
6052	-0.000386
6053	-0.000378
6054	-0.000339
6055	-0.000319
6056	-0.000307
6057	-0.000314
6058	-0.000325
6059	-0.000348
6060	-0.000357
6061	-0.000346
6062	-0.000332
6063	-0.00032
6064	-0.000342
6065	-0.00034
6066	-0.000341
6067	-0.000346
6068	-0.000347
6069	-0.000295
6070	-0.000257
6071	-0.000231
6072	-0.000244
6073	-0.000297
6074	-0.000295
6075	-0.000282
6076	-0.000293
6077	-0.000292
6078	-0.000302
6079	-0.000358
6080	-0.000378
6081	-0.000341
6082	-0.000326
6083	-0.000368
6084	-0.00037
6085	-0.000358
6086	-0.000347
6087	-0.000362
6088	-0.000364
6089	-0.000357
6090	-0.000342
6091	-0.00035
6092	-0.000351
6093	-0.000372
6094	-0.000401
6095	-0.000413
6096	-0.00044
6097	-0.000462
6098	-0.000451
6099	-0.000452
6100	-0.000462
6101	-0.000483
6102	-0.000485
6103	-0.000503
6104	-0.000517
6105	-0.000528
6106	-0.000489
6107	-0.000437
6108	-0.00044
6109	-0.00047
6110	-0.000451
6111	-0.000404
6112	-0.000373
6113	-0.000338
6114	-0.000313
6115	-0.00035
6116	-0.000351
6117	-0.000296
6118	-0.000232
6119	-0.00027
6120	-0.000294
6121	-0.000305
6122	-0.000359
6123	-0.000367
6124	-0.000322
6125	-0.000304
6126	-0.000307
6127	-0.000296
6128	-0.000292
6129	-0.000273
6130	-0.000294
6131	-0.00031
6132	-0.000317
6133	-0.000342
6134	-0.000367
6135	-0.000386
6136	-0.000378
6137	-0.000376
6138	-0.000394
6139	-0.000423
6140	-0.000445
6141	-0.000455
6142	-0.000504
6143	-0.000506
6144	-0.00047
6145	-0.000433
6146	-0.000414
6147	-0.000393
6148	-0.000342
6149	-0.000303
6150	-0.000287
6151	-0.000325
6152	-0.000379
6153	-0.000387
6154	-0.000387
6155	-0.000404
6156	-0.000399
6157	-0.000402
6158	-0.000406
6159	-0.000434
6160	-0.000381
6161	-0.000353
6162	-0.00037
6163	-0.000377
6164	-0.000331
6165	-0.000334
6166	-0.000378
6167	-0.000423
6168	-0.000428
6169	-0.000428
6170	-0.000407
6171	-0.000399
6172	-0.00039
6173	-0.000369
6174	-0.000358
6175	-0.00036
6176	-0.000326
6177	-0.000277
6178	-0.000297
6179	-0.000339
6180	-0.00036
6181	-0.00038
6182	-0.000411
6183	-0.000424
6184	-0.000426
6185	-0.000422
6186	-0.00041
6187	-0.000418
6188	-0.000443
6189	-0.000478
6190	-0.000484
6191	-0.000484
6192	-0.000468
6193	-0.000474
6194	-0.000488
6195	-0.000484
6196	-0.000437
6197	-0.000369
6198	-0.000321
6199	-0.000311
6200	-0.000339
6201	-0.000365
6202	-0.000401
6203	-0.000404
6204	-0.000396
6205	-0.000385
6206	-0.000384
6207	-0.000377
6208	-0.000375
6209	-0.000376
6210	-0.000385
6211	-0.000385
6212	-0.000399
6213	-0.000382
6214	-0.000328
6215	-0.000283
6216	-0.000284
6217	-0.000322
6218	-0.000333
6219	-0.000323
6220	-0.000307
6221	-0.00036
6222	-0.000395
6223	-0.000391
6224	-0.000342
6225	-0.000288
6226	-0.000294
6227	-0.000322
6228	-0.00032
6229	-0.000296
6230	-0.000286
6231	-0.000274
6232	-0.000279
6233	-0.000271
6234	-0.000268
6235	-0.000283
6236	-0.00031
6237	-0.000292
6238	-0.000245
6239	0
6240	0
6241	1.5e-05
6242	-4e-06
6243	-4e-05
6244	-4.4e-05
6245	-1.6e-05
6246	-2.5e-05
6247	-4.4e-05
6248	-3.6e-05
6249	-1.6e-05
6250	-1.3e-05
6251	-2.8e-05
6252	-2.8e-05
6253	-4.8e-05
6254	-8.7e-05
6255	-9.7e-05
6256	-5.5e-05
6257	-4e-05
6258	-6.9e-05
6259	-9.5e-05
6260	-9.5e-05
6261	-0.000126
6262	-0.000142
6263	-0.00016
6264	-0.000163
6265	-0.000164
6266	-0.000177
6267	-0.000186
6268	-0.000157
6269	-0.000151
6270	-0.000172
6271	-0.000204
6272	-0.000202
6273	-0.000169
6274	-0.000127
6275	-0.000125
6276	-0.000121
6277	-0.000127
6278	-0.000141
6279	-0.000127
6280	-0.0001
6281	-0.000123
6282	-0.000128
6283	-0.000127
6284	-9.9e-05
6285	-9.6e-05
6286	-0.000126
6287	-0.000131
6288	-0.000127
6289	-0.000144
6290	-0.000135
6291	-0.000116
6292	-0.000107
6293	-0.000116
6294	-0.000153
6295	-0.0002
6296	-0.000246
6297	-0.000253
6298	-0.000257
6299	-0.000263
6300	-0.000271
6301	-0.000257
6302	-0.000191
6303	-0.000165
6304	-0.000183
6305	-0.000216
6306	-0.000229
6307	-0.000236
6308	-0.000262
6309	-0.000278
6310	-0.000263
6311	-0.000226
6312	-0.000159
6313	-0.000127
6314	-0.000106
6315	-0.000108
6316	-9.7e-05
6317	-0.000111
6318	-0.000146
6319	-0.000172
6320	-0.000161
6321	-0.000139
6322	-0.000143
6323	-0.000148
6324	-0.000135
6325	-9.8e-05
6326	-9.5e-05
6327	-6.4e-05
6328	-2.5e-05
6329	-2.7e-05
6330	-6.5e-05
6331	-0.000103
6332	-0.000138
6333	-0.000173
6334	-0.000198
6335	-0.000209
6336	-0.000178
6337	-0.000134
6338	-7.5e-05
6339	-5.8e-05
6340	-6e-05
6341	-6.7e-05
6342	-6.3e-05
6343	-6.3e-05
6344	-8.5e-05
6345	-9.6e-05
6346	-8.5e-05
6347	0
6348	2.8e-05
6349	3.9e-05
6350	3e-05
6351	2.1e-05
6352	3.6e-05
6353	5.4e-05
6354	0.000107
6355	0.000144
6356	0.000143
6357	0.00012
6358	0.000111
6359	0.000113
6360	7.4e-05
6361	1.7e-05
6362	3.8e-05
6363	6.5e-05
6364	7e-05
6365	5.6e-05
6366	7.4e-05
6367	0.000114
6368	0.00011
6369	4.8e-05
6370	1.6e-05
6371	3.9e-05
6372	7.6e-05
6373	8.7e-05
6374	9.4e-05
6375	8.8e-05
6376	5.3e-05
6377	4.5e-05
6378	4.7e-05
6379	4.6e-05
6380	2.8e-05
6381	3.1e-05
6382	3.2e-05
6383	6e-06
6384	1e-05
6385	2.9e-05
6386	6.8e-05
6387	8.7e-05
6388	7.2e-05
6389	4.1e-05
6390	5.1e-05
6391	3.3e-05
6392	-1.9e-05
6393	-5.7e-05
6394	-6.2e-05
6395	-8.3e-05
6396	-0.000117
6397	-0.000127
6398	-0.000107
6399	-0.000116
6400	-8.6e-05
6401	-6.1e-05
6402	-8e-05
6403	-0.00012
6404	-0.000127
6405	-0.000115
6406	-9.8e-05
6407	-8.3e-05
6408	-8.4e-05
6409	-9.2e-05
6410	-0.000111
6411	-0.00013
6412	-7.6e-05
6413	-4.7e-05
6414	1e-05
6415	-1.1e-05
6416	-4.7e-05
6417	-7e-05
6418	-4.3e-05
6419	-3e-06
6420	8e-06
6421	-2e-06
6422	1e-05
6423	-1.7e-05
6424	-4.8e-05
6425	-6.4e-05
6426	-7.7e-05
6427	-5e-05
6428	-2.1e-05
6429	-5.1e-05
6430	-0.0001
6431	-0.00013
6432	-0.000117
6433	-7.8e-05
6434	-5.6e-05
6435	-5.2e-05
6436	-6e-05
6437	-5.9e-05
6438	-4.1e-05
6439	-6.4e-05
6440	-0.000165
6441	-0.000238
6442	-0.000253
6443	-0.000239
6444	-0.000277
6445	-0.000289
6446	-0.000276
6447	-0.000302
6448	-0.000376
6449	-0.000439
6450	-0.000412
6451	-0.000361
6452	-0.000322
6453	-0.00035
6454	-0.000356
6455	-0.000389
6456	-0.00034
6457	-0.000312
6458	-0.000315
6459	-0.00034
6460	-0.000328
6461	-0.000341
6462	-0.000365
6463	-0.000375
6464	-0.000382
6465	-0.000377
6466	-0.000375
6467	-0.000397
6468	-0.00039
6469	-0.000355
6470	-0.000314
6471	-0.000339
6472	-0.000376
6473	-0.000385
6474	-0.000353
6475	-0.000319
6476	-0.000272
6477	-0.000268
6478	-0.00028
6479	-0.000293
6480	-0.000262
6481	-0.000259
6482	-0.000319
6483	-0.000398
6484	-0.000427
6485	-0.00043
6486	-0.000438
6487	-0.000487
6488	-0.000504
6489	-0.000514
6490	-0.000551
6491	-0.000555
6492	-0.000529
6493	-0.000513
6494	-0.000542
6495	-0.000553
6496	-0.000538
6497	-0.000509
6498	-0.000508
6499	-0.000499
6500	-0.000497
6501	-0.000481
6502	-0.000506
6503	-0.000517
6504	-0.000524
6505	-0.000505
6506	-0.000482
6507	-0.000435
6508	-0.000393
6509	-0.000389
6510	-0.000469
6511	-0.000501
6512	-0.000496
6513	-0.0005
6514	-0.000538
6515	-0.000539
6516	-0.000513
6517	-0.000478
6518	-0.000447
6519	-0.000436
6520	-0.000451
6521	-0.000464
6522	-0.000481
6523	-0.000477
6524	-0.000502
6525	-0.000514
6526	-0.000518
6527	-0.0005
6528	-0.00049
6529	-0.000471
6530	-0.000457
6531	-0.00045
6532	-0.000477
6533	-0.000473
6534	-0.000457
6535	-0.000472
6536	-0.00048
6537	-0.000472
6538	-0.000465
6539	-0.000423
6540	-0.000432
6541	-0.000493
6542	-0.000468
6543	-0.000397
6544	-0.00037
6545	-0.000428
6546	-0.000465
6547	-0.000489
6548	-0.000489
6549	-0.000488
6550	-0.000456
6551	-0.000393
6552	-0.000319
6553	-0.000311
6554	-0.000352
6555	-0.000371
6556	-0.000395
6557	-0.00041
6558	-0.000412
6559	-0.000397
6560	-0.000383
6561	-0.000376
6562	-0.000357
6563	-0.000332
6564	-0.000327
6565	-0.000302
6566	-0.000352
6567	-0.000393
6568	-0.000393
6569	-0.000363
6570	-0.000362
6571	-0.000374
6572	-0.000383
6573	-0.000383
6574	-0.000381
6575	-0.000343
6576	-0.000339
6577	-0.000371
6578	-0.000358
6579	-0.00031
6580	-0.000338
6581	-0.000374
6582	-0.000406
6583	-0.000404
6584	-0.000395
6585	-0.00035
6586	-0.000361
6587	-0.000402
6588	-0.000348
6589	-0.000315
6590	-0.000355
6591	-0.000386
6592	-0.000382
6593	-0.000356
6594	-0.000389
6595	-0.000434
6596	-0.000411
6597	-0.000394
6598	-0.000408
6599	-0.000414
6600	-0.000436
6601	-0.000436
6602	-0.00043
6603	-0.000395
6604	-0.000393
6605	-0.000413
6606	-0.000402
6607	-0.000363
6608	-0.000378
6609	-0.000449
6610	-0.00048
6611	-0.000424
6612	-0.000392
6613	-0.000411
6614	-0.000453
6615	-0.000468
6616	-0.00046
6617	-0.000431
6618	-0.000427
6619	-0.000413
6620	-0.000406
6621	-0.000464
6622	-0.000497
6623	-0.000507
6624	-0.000451
6625	-0.00039
6626	-0.000441
6627	-0.000541
6628	-0.000556
6629	-0.000545
6630	-0.000566
6631	-0.00059
6632	-0.000605
6633	-0.000603
6634	-0.000567
6635	-0.000496
6636	-0.000495
6637	-0.000543
6638	-0.000544
6639	-0.000535
6640	-0.000521
6641	-0.000495
6642	-0.000517
6643	-0.000549
6644	-0.000582
6645	-0.000536
6646	-0.000473
6647	-0.000418
6648	-0.000417
6649	-0.000468
6650	-0.000475
6651	-0.00044
6652	-0.000438
6653	-0.000429
6654	-0.000426
6655	-0.000442
6656	-0.000486
6657	-0.000505
6658	-0.000498
6659	-0.000527
6660	-0.000542
6661	-0.000523
6662	-0.000458
6663	-0.000421
6664	-0.000398
6665	-0.000377
6666	-0.000396
6667	-0.000431
6668	-0.000457
6669	-0.000454
6670	-0.000482
6671	-0.000508
6672	-0.000489
6673	-0.000465
6674	-0.000491
6675	-0.000493
6676	-0.00047
6677	-0.000408
6678	-0.000388
6679	-0.000415
6680	-0.000475
6681	-0.000515
6682	-0.00052
6683	-0.000497
6684	-0.000477
6685	-0.000498
6686	-0.000499
6687	-0.000472
6688	-0.000487
6689	-0.000541
6690	-0.000574
6691	-0.000564
6692	-0.000561
6693	-0.00061
6694	-0.000644
6695	-0.000607
6696	-0.000619
6697	-0.000633
6698	-0.000625
6699	-0.000603
6700	-0.000603
6701	-0.000639
6702	-0.000651
6703	-0.000619
6704	-0.000569
6705	-0.000567
6706	-0.00059
6707	-0.000597
6708	-0.000555
6709	-0.00053
6710	-0.000518
6711	-0.00051
6712	-0.000501
6713	-0.000554
6714	-0.000594
6715	-0.000622
6716	-0.000642
6717	-0.000671
6718	-0.000745
6719	-0.00073
6720	-0.000691
6721	-0.000668
6722	-0.0007
6723	-0.000735
6724	-0.000761
6725	-0.00076
6726	-0.00078
6727	-0.000769
6728	-0.000765
6729	-0.000756
6730	-0.000736
6731	-0.000706
6732	-0.000714
6733	-0.000791
6734	-0.000793
6735	-0.000735
6736	-0.000716
6737	-0.00073
6738	-0.000756
6739	-0.000773
6740	-0.000766
6741	-0.000742
6742	-0.000716
6743	-0.000714
6744	-0.000731
6745	-0.000743
6746	-0.000776
6747	-0.000796
6748	-0.000801
6749	-0.000803
6750	-0.000771
6751	-0.000746
6752	-0.000763
6753	-0.000756
6754	-0.000737
6755	-0.000749
6756	-0.000756
6757	-0.000732
6758	-0.000724
6759	-0.000715
6760	-0.000696
6761	-0.000732
6762	-0.000754
6763	-0.000762
6764	-0.000773
6765	-0.000822
6766	-0.000812
6767	-0.000814
6768	-0.000815
6769	-0.000816
6770	-0.000852
6771	-0.000827
6772	-0.000788
6773	-0.000781
6774	-0.000826
6775	-0.000846
6776	-0.000822
6777	-0.00081
6778	-0.000814
6779	-0.000837
6780	-0.000849
6781	-0.000892
6782	-0.000952
6783	-0.000976
6784	-0.000966
6785	-0.000902
6786	-0.000848
6787	-0.000841
6788	-0.000839
6789	-0.000841
6790	-0.000819
6791	-0.000801
6792	-0.000838
6793	-0.000893
6794	-0.000928
6795	-0.00094
6796	-0.00095
6797	-0.000942
6798	-0.000938
6799	-0.000909
6800	-0.000891
6801	-0.000864
6802	-0.00086
6803	-0.00087
6804	-0.000889
6805	-0.00086
6806	-0.000827
6807	-0.000824
6808	-0.000833
6809	-0.000843
6810	-0.000856
6811	-0.000874
6812	-0.000824
6813	-0.000803
6814	-0.000847
6815	-0.000877
6816	-0.000894
6817	-0.000877
6818	-0.000844
6819	-0.000863
6820	-0.000892
6821	-0.000875
6822	-0.000845
6823	-0.000835
6824	-0.000867
6825	-0.000853
6826	-0.000886
6827	-0.00092
6828	-0.000948
6829	-0.00095
6830	-0.000926
6831	-0.000846
6832	-0.000814
6833	-0.000808
6834	-0.000834
6835	-0.000848
6836	-0.000871
6837	-0.00086
6838	-0.000821
6839	-0.00085
6840	-0.000878
6841	-0.000898
6842	-0.000866
6843	-0.000851
6844	-0.000863
6845	-0.000895
6846	-0.000872
6847	-0.000809
6848	-0.000756
6849	-0.000784
6850	-0.000854
6851	-0.000876
6852	-0.000871
6853	-0.000873
6854	-0.000885
6855	-0.000904
6856	-0.000944
6857	-0.000975
6858	-0.00094
6859	-0.000897
6860	-0.000898
6861	-0.000904
6862	-0.000922
6863	-0.000925
6864	-0.000915
6865	-0.00086
6866	-0.000805
6867	-0.000776
6868	-0.000759
6869	-0.000755
6870	-0.000753
6871	-0.000745
6872	-0.000718
6873	-0.00069
6874	-0.000697
6875	-0.000738
6876	-0.000807
6877	-0.000835
6878	-0.000798
6879	-0.000755
6880	-0.000763
6881	-0.00078
6882	-0.000793
6883	-0.00082
6884	-0.000814
6885	-0.000739
6886	-0.000698
6887	-0.000667
6888	-0.000712
6889	-0.000728
6890	-0.000694
6891	-0.00066
6892	-0.000648
6893	-0.000618
6894	-0.000616
6895	-0.000645
6896	-0.000663
6897	-0.000666
6898	-0.000726
6899	-0.000817
6900	-0.000851
6901	-0.000829
6902	-0.000825
6903	-0.000824
6904	-0.000819
6905	-0.000811
6906	-0.000793
6907	-0.000758
6908	-0.000723
6909	-0.000681
6910	-0.000591
6911	-0.000518
6912	-0.00051
6913	-0.000539
6914	-0.000607
6915	-0.000644
6916	-0.000656
6917	-0.000635
6918	-0.00064
6919	-0.000684
6920	-0.000693
6921	-0.000669
6922	-0.000693
6923	-0.000677
6924	-0.000632
6925	-0.000639
6926	-0.000642
6927	-0.000625
6928	-0.000643
6929	-0.000655
6930	-0.000677
6931	-0.000637
6932	-0.000629
6933	-0.00064
6934	-0.000654
6935	-0.000654
6936	-0.000666
6937	-0.00071
6938	-0.000718
6939	-0.000715
6940	-0.000694
6941	-0.000642
6942	-0.000643
6943	-0.000671
6944	-0.00067
6945	-0.000664
6946	-0.000649
6947	-0.00063
6948	-0.000622
6949	-0.000613
6950	-0.000607
6951	-0.000605
6952	-0.000613
6953	-0.00061
6954	-0.000606
6955	-0.000612
6956	-0.000654
6957	-0.000659
6958	-0.000645
6959	-0.000636
6960	-0.000663
6961	-0.000693
6962	-0.000687
6963	-0.000678
6964	-0.000723
6965	-0.000766
6966	-0.000793
6967	-0.000801
6968	-0.000788
6969	-0.000722
6970	-0.000683
6971	-0.000661
6972	-0.000644
6973	-0.000664
6974	-0.000689
6975	-0.000674
6976	-0.000674
6977	-0.000697
6978	-0.000687
6979	-0.000672
6980	-0.000691
6981	-0.000732
6982	-0.000726
6983	-0.000682
6984	-0.00063
6985	-0.000571
6986	-0.000513
6987	-0.000504
6988	-0.000511
6989	-0.000542
6990	-0.000565
6991	-0.00054
6992	-0.000534
6993	-0.000518
6994	-0.000505
6995	-0.000472
6996	-0.000475
6997	-0.000496
6998	-0.000505
6999	-0.000491
7000	-0.000486
7001	-0.000534
7002	-0.000567
7003	-0.000529
7004	-0.000471
7005	-0.000471
7006	-0.000441
7007	-0.00042
7008	-0.000408
7009	-0.000405
7010	-0.00042
7011	-0.000459
7012	-0.000454
7013	-0.00048
7014	-0.000509
7015	-0.000542
7016	-0.000557
7017	-0.000532
7018	-0.000508
7019	-0.000527
7020	-0.000556
7021	-0.000545
7022	-0.000513
7023	-0.000507
7024	-0.000509
7025	-0.000546
7026	-0.0006
7027	-0.000581
7028	-0.000499
7029	-0.000462
7030	-0.000505
7031	-0.000579
7032	-0.000589
7033	-0.000566
7034	-0.000517
7035	-0.000473
7036	-0.000463
7037	-0.000494
7038	-0.000532
7039	-0.000524
7040	-0.000536
7041	-0.000545
7042	-0.000513
7043	-0.000481
7044	-0.000512
7045	-0.00056
7046	-0.000644
7047	-0.000654
7048	-0.000625
7049	-0.000595
7050	-0.000566
7051	-0.000547
7052	-0.000542
7053	-0.000478
7054	-0.000467
7055	-0.000531
7056	-0.00057
7057	-0.000545
7058	-0.000547
7059	-0.000523
7060	-0.000501
7061	-0.000506
7062	-0.000525
7063	-0.000528
7064	-0.000515
7065	-0.000506
7066	-0.000509
7067	-0.000507
7068	-0.000484
7069	-0.000488
7070	-0.000535
7071	-0.000562
7072	-0.00053
7073	-0.000515
7074	-0.000532
7075	-0.000561
7076	-0.00055
7077	-0.000559
7078	-0.000568
7079	-0.000584
7080	-0.000575
7081	-0.000538
7082	-0.00051
7083	-0.0005
7084	-0.000509
7085	-0.000515
7086	-0.000522
7087	-0.000495
7088	-0.000459
7089	-0.000486
7090	-0.000537
7091	-0.000587
7092	-0.000614
7093	-0.000614
7094	-0.000592
7095	-0.000563
7096	-0.000568
7097	-0.000571
7098	-0.000552
7099	-0.000517
7100	-0.000517
7101	-0.000528
7102	-0.000508
7103	-0.000469
7104	-0.000457
7105	-0.000484
7106	-0.000486
7107	-0.000463
7108	-0.000474
7109	-0.00049
7110	-0.000512
7111	-0.000505
7112	-0.000452
7113	-0.00043
7114	-0.000423
7115	-0.000398
7116	-0.000417
7117	-0.00046
7118	-0.000503
7119	-0.000492
7120	-0.000485
7121	-0.000489
7122	-0.000503
7123	-0.000525
7124	-0.000544
7125	-0.000523
7126	-0.000456
7127	-0.000416
7128	-0.000426
7129	-0.000447
7130	-0.000455
7131	-0.000479
7132	-0.000469
7133	-0.000433
7134	-0.000403
7135	-0.000435
7136	-0.000494
7137	-0.000529
7138	-0.000539
7139	-0.000541
7140	-0.000549
7141	-0.000548
7142	-0.000561
7143	-0.000534
7144	-0.000491
7145	-0.00045
7146	-0.000433
7147	-0.000457
7148	-0.000501
7149	-0.000524
7150	-0.000516
7151	-0.000502
7152	-0.000501
7153	-0.000512
7154	-0.000543
7155	-0.00053
7156	-0.000516
7157	-0.0005
7158	-0.000518
7159	-0.000539
7160	-0.000537
7161	-0.000517
7162	-0.000491
7163	-0.00048
7164	-0.000473
7165	-0.000464
7166	-0.000459
7167	-0.000474
7168	-0.000457
7169	-0.000445
7170	-0.000445
7171	-0.000469
7172	-0.000488
7173	-0.000494
7174	-0.000494
7175	-0.000481
7176	-0.000483
7177	-0.000507
7178	-0.000521
7179	-0.000513
7180	-0.000479
7181	-0.000439
7182	-0.000409
7183	-0.000435
7184	-0.000435
7185	-0.000418
7186	-0.00044
7187	-0.000451
7188	-0.00047
7189	-0.000499
7190	-0.000525
7191	-0.000563
7192	-0.00057
7193	-0.000636
7194	-0.000662
7195	-0.000648
7196	-0.000599
7197	-0.000558
7198	-0.000546
7199	-0.000565
7200	-0.000574
7201	-0.000593
7202	-0.000602
7203	-0.000584
7204	-0.000544
7205	-0.000537
7206	-0.000544
7207	-0.000567
7208	-0.000594
7209	-0.000598
7210	-0.000611
7211	-0.000609
7212	-0.000571
7213	-0.000572
7214	-0.000583
7215	-0.000563
7216	-0.00055
7217	-0.000542
7218	-0.00049
7219	-0.000451
7220	-0.000454
7221	-0.000457
7222	-0.00048
7223	-0.000539
7224	-0.00057
7225	-0.000517
7226	-0.000487
7227	-0.000482
7228	-0.000507
7229	-0.000557
7230	-0.000546
7231	-0.000495
7232	-0.000493
7233	-0.00052
7234	-0.000523
7235	-0.000555
7236	-0.000576
7237	-0.00058
7238	-0.000559
7239	-0.000547
7240	-0.000517
7241	-0.000476
7242	-0.000472
7243	-0.000506
7244	-0.000552
7245	-0.000555
7246	-0.000604
7247	-0.000624
7248	-0.000605
7249	-0.000564
7250	-0.00053
7251	-0.00047
7252	-0.000413
7253	-0.000412
7254	-0.000408
7255	-0.000452
7256	-0.000519
7257	-0.000545
7258	-0.000537
7259	-0.000529
7260	-0.000527
7261	-0.000538
7262	-0.000533
7263	-0.000475
7264	-0.00042
7265	-0.000438
7266	-0.000481
7267	-0.000495
7268	-0.000461
7269	-0.00041
7270	-0.000414
7271	-0.000467
7272	-0.00048
7273	-0.000483
7274	-0.000464
7275	-0.000471
7276	-0.000469
7277	-0.0004
7278	-0.000388
7279	-0.000427
7280	-0.000484
7281	-0.000532
7282	-0.000548
7283	-0.000537
7284	-0.00052
7285	-0.00047
7286	-0.00042
7287	-0.000429
7288	-0.000431
7289	-0.000481
7290	-0.000511
7291	-0.000503
7292	-0.00049
7293	-0.000468
7294	-0.00045
7295	-0.000392
7296	-0.000378
7297	-0.000362
7298	-0.00035
7299	-0.000344
7300	-0.000366
7301	-0.000368
7302	-0.00037
7303	-0.000385
7304	-0.000371
7305	-0.000407
7306	-0.000398
7307	-0.000375
7308	-0.00038
7309	-0.00039
7310	-0.000378
7311	-0.000336
7312	-0.00032
7313	-0.000274
7314	-0.00023
7315	-0.000258
7316	-0.000245
7317	-0.000235
7318	-0.000264
7319	-0.000342
7320	-0.000391
7321	-0.000372
7322	-0.000359
7323	-0.000402
7324	-0.000464
7325	-0.000443
7326	-0.000435
7327	-0.00041
7328	-0.000402
7329	-0.000424
7330	-0.000447
7331	-0.000434
7332	-0.000398
7333	-0.000391
7334	-0.00039
7335	-0.000377
7336	-0.000353
7337	-0.000335
7338	-0.000319
7339	-0.000315
7340	-0.000346
7341	-0.000368
7342	-0.000361
7343	-0.000362
7344	-0.000378
7345	-0.000396
7346	-0.000356
7347	-0.000319
7348	-0.000308
7349	-0.000345
7350	-0.0004
7351	-0.000462
7352	-0.000463
7353	-0.000425
7354	-0.000405
7355	-0.000392
7356	-0.000378
7357	-0.000383
7358	-0.000379
7359	-0.000374
7360	-0.000388
7361	-0.000403
7362	-0.000362
7363	-0.000353
7364	-0.000402
7365	-0.000447
7366	-0.000464
7367	-0.00043
7368	-0.000346
7369	-0.00028
7370	-0.000283
7371	-0.000271
7372	-0.00028
7373	-0.000251
7374	-0.000259
7375	-0.000286
7376	-0.000324
7377	-0.000345
7378	-0.000356
7379	-0.000364
7380	-0.000385
7381	-0.000388
7382	-0.000382
7383	-0.000368
7384	-0.000371
7385	-0.000347
7386	-0.000341
7387	-0.000369
7388	-0.000371
7389	-0.00035
7390	-0.000336
7391	-0.000311
7392	-0.000278
7393	-0.000293
7394	-0.000341
7395	-0.000354
7396	-0.000368
7397	-0.000392
7398	-0.000411
7399	-0.000415
7400	-0.000408
7401	-0.000439
7402	-0.000473
7403	-0.000448
7404	-0.000414
7405	-0.000404
7406	-0.000419
7407	-0.000465
7408	-0.000468
7409	-0.00046
7410	-0.000496
7411	-0.000529
7412	-0.000494
7413	-0.000445
7414	-0.000439
7415	-0.000446
7416	-0.00045
7417	-0.000492
7418	-0.000487
7419	-0.000451
7420	-0.000438
7421	-0.00043
7422	-0.000399
7423	-0.000392
7424	-0.000414
7425	-0.000445
7426	-0.000465
7427	-0.000478
7428	-0.00045
7429	-0.000414
7430	-0.00035
7431	-0.000356
7432	-0.000353
7433	-0.000353
7434	-0.000338
7435	-0.000361
7436	-0.000387
7437	-0.000378
7438	-0.000347
7439	-0.000312
7440	-0.000256
7441	-0.000256
7442	-0.000295
7443	-0.000349
7444	-0.000355
7445	-0.000353
7446	-0.000378
7447	-0.000402
7448	-0.000407
7449	-0.000397
7450	-0.000374
7451	-0.000363
7452	-0.000366
7453	-0.000337
7454	-0.000273
7455	-0.00023
7456	-0.000252
7457	-0.000277
7458	-0.000286
7459	-0.000277
7460	-0.000246
7461	-0.000217
7462	-0.000216
7463	-0.000189
7464	-0.000177
7465	-0.000219
7466	-0.000235
7467	-0.000198
7468	-0.000193
7469	-0.000149
7470	-8.4e-05
7471	-4.6e-05
7472	-0.000103
7473	-0.000177
7474	-0.000169
7475	-0.000168
7476	-0.000179
7477	-0.000171
7478	-0.000167
7479	-0.000142
7480	-0.000146
7481	-0.000167
7482	-0.000164
7483	-0.00018
7484	-0.000189
7485	-0.000159
7486	-0.000137
7487	-0.000152
7488	-0.000163
7489	-0.000162
7490	-0.000164
7491	-0.000193
7492	-0.000224
7493	-0.000248
7494	-0.000247
7495	-0.000274
7496	-0.000268
7497	-0.000231
7498	-0.000214
7499	-0.000231
7500	-0.000256
7501	-0.000286
7502	-0.000242
7503	-0.00018
7504	-0.000183
7505	-0.000242
7506	-0.000306
7507	-0.000382
7508	-0.000432
7509	-0.000419
7510	-0.000377
7511	-0.000378
7512	-0.000377
7513	-0.000384
7514	-0.000325
7515	-0.000229
7516	-0.000171
7517	-0.000166
7518	-0.000155
7519	-0.000118
7520	-0.000109
7521	-0.000154
7522	-0.000228
7523	-0.000278
7524	-0.000308
7525	-0.000284
7526	-0.000316
7527	-0.000338
7528	-0.000344
7529	-0.00034
7530	-0.000318
7531	-0.000278
7532	-0.000253
7533	-0.000226
7534	-0.000226
7535	-0.000211
7536	-0.000191
7537	-0.000195
7538	-0.000212
7539	-0.000227
7540	-0.000185
7541	-0.000151
7542	-0.000179
7543	-0.000206
7544	-0.000196
7545	-0.000189
7546	-0.00018
7547	-0.000217
7548	-0.000253
7549	-0.000237
7550	-0.000206
7551	-0.00017
7552	-0.000165
7553	-0.000193
7554	-0.000195
7555	-0.000175
7556	-0.000187
7557	-0.000189
7558	-0.000177
7559	-0.000144
7560	-0.000116
7561	-0.00012
7562	-0.000129
7563	-9.1e-05
7564	-6.5e-05
7565	-7e-05
7566	-0.0001
7567	-9.8e-05
7568	-7.7e-05
7569	-7.2e-05
7570	-3.3e-05
7571	-1.2e-05
7572	-4.2e-05
7573	-9.2e-05
7574	-0.000141
7575	-0.000155
7576	-0.000213
7577	-0.000279
7578	-0.000292
7579	-0.000286
7580	-0.000233
7581	-0.000181
7582	-0.000175
7583	-0.000143
7584	-0.000122
7585	-0.000112
7586	-0.000107
7587	-8.1e-05
7588	-5.2e-05
7589	-2.9e-05
7590	-2.6e-05
7591	-4.9e-05
7592	-7e-05
7593	-7.3e-05
7594	-8.7e-05
7595	-0.000142
7596	-0.000157
7597	-0.000116
7598	-9.4e-05
7599	-0.000123
7600	-0.000156
7601	-0.000188
7602	-0.000186
7603	-0.000192
7604	-0.000197
7605	-0.000219
7606	-0.000228
7607	-0.000194
7608	-0.000148
7609	-0.000124
7610	-0.000129
7611	-0.000143
7612	-0.000109
7613	-0.000106
7614	-0.000101
7615	-0.000104
7616	-0.000136
7617	-0.000219
7618	-0.000208
7619	-0.000204
7620	-0.000202
7621	-0.000204
7622	-0.000222
7623	-0.000248
7624	-0.000252
7625	-0.000249
7626	-0.000285
7627	-0.0003
7628	-0.00028
7629	-0.000266
7630	-0.000262
7631	-0.000299
7632	-0.000323
7633	-0.000285
7634	-0.000254
7635	-0.000267
7636	-0.000265
7637	-0.000223
7638	-0.000232
7639	-0.000279
7640	-0.00032
7641	-0.000301
7642	-0.000308
7643	-0.000352
7644	-0.000353
7645	-0.00033
7646	-0.000272
7647	-0.000217
7648	-0.000203
7649	-0.000171
7650	-0.000154
7651	-0.000172
7652	-0.000229
7653	-0.000258
7654	-0.000296
7655	-0.000326
7656	-0.000349
7657	-0.00033
7658	-0.000313
7659	-0.000284
7660	-0.000235
7661	-0.00023
7662	-0.000258
7663	-0.000267
7664	-0.000241
7665	-0.000207
7666	-0.000255
7667	-0.000301
7668	-0.000309
7669	-0.000287
7670	-0.000308
7671	-0.000319
7672	-0.000319
7673	-0.00031
7674	-0.000377
7675	-0.000399
7676	-0.000364
7677	-0.000286
7678	-0.000217
7679	-0.000229
7680	-0.000298
7681	-0.00035
7682	-0.000353
7683	-0.000312
7684	-0.000283
7685	-0.000308
7686	-0.000334
7687	-0.00033
7688	-0.000297
7689	-0.000275
7690	-0.000314
7691	-0.000392
7692	-0.000472
7693	-0.000458
7694	-0.000393
7695	-0.000362
7696	-0.00033
7697	-0.000338
7698	-0.000328
7699	-0.000319
7700	-0.00031
7701	-0.000335
7702	-0.000336
7703	-0.00037
7704	-0.000406
7705	-0.000395
7706	-0.000359
7707	-0.000358
7708	-0.000326
7709	-0.00031
7710	-0.000317
7711	-0.000331
7712	-0.000365
7713	-0.000391
7714	-0.000416
7715	-0.000431
7716	-0.000442
7717	-0.000442
7718	-0.000452
7719	-0.000461
7720	-0.00047
7721	-0.000474
7722	-0.000468
7723	-0.000457
7724	-0.000453
7725	-0.000461
7726	-0.000446
7727	-0.000437
7728	-0.000429
7729	-0.00041
7730	-0.000372
7731	-0.000372
7732	-0.000386
7733	-0.000423
7734	-0.000404
7735	-0.000353
7736	-0.000371
7737	-0.000373
7738	-0.000319
7739	-0.000261
7740	-0.000261
7741	-0.000247
7742	-0.000226
7743	-0.000205
7744	-0.0002
7745	-0.000189
7746	-0.000196
7747	-0.0002
7748	-0.000211
7749	-0.000234
7750	-0.000236
7751	-0.000219
7752	-0.000192
7753	-0.000168
7754	-0.00018
7755	-0.000193
7756	-0.00022
7757	-0.000255
7758	-0.00026
7759	-0.000252
7760	-0.000242
7761	-0.000305
7762	-0.000356
7763	-0.000372
7764	-0.000319
7765	-0.000282
7766	-0.000274
7767	-0.000259
7768	-0.000234
7769	-0.000203
7770	-0.000206
7771	-0.000184
7772	-0.000171
7773	-0.000145
7774	-0.000149
7775	-0.000172
7776	-0.000174
7777	-0.000224
7778	-0.000211
7779	-0.000194
7780	-0.000202
7781	-0.000235
7782	-0.000245
7783	-0.000229
7784	-0.000221
7785	-0.000224
7786	-0.000189
7787	-0.000191
7788	-0.000169
7789	-0.000149
7790	-0.000132
7791	-0.000134
7792	-0.000133
7793	-0.000134
7794	-0.000142
7795	-0.000169
7796	-0.000137
7797	-0.00014
7798	-0.000177
7799	-0.000215
7800	-0.000203
7801	-0.000172
7802	-0.000135
7803	-0.000121
7804	-0.000141
7805	-0.000179
7806	-0.00019
7807	-0.000192
7808	-0.000186
7809	-0.000244
7810	-0.000295
7811	-0.000288
7812	-0.000238
7813	-0.000224
7814	-0.000201
7815	-0.00017
7816	-0.000139
7817	-0.000131
7818	-0.000151
7819	-0.000173
7820	-0.000154
7821	-0.000161
7822	-0.000136
7823	-0.000129
7824	-0.000152
7825	-0.000178
7826	-0.000213
7827	-0.000241
7828	-0.000222
7829	-0.000206
7830	-0.000187
7831	-0.000158
7832	-0.000155
7833	-0.000167
7834	-0.00016
7835	-0.00015
7836	-0.000153
7837	-0.000217
7838	-0.000248
7839	-0.000255
7840	-0.000288
7841	-0.000321
7842	-0.000288
7843	-0.000216
7844	-0.000203
7845	-0.00024
7846	-0.00024
7847	-0.000218
7848	-0.000209
7849	-0.000227
7850	-0.000234
7851	-0.000218
7852	-0.000222
7853	-0.000254
7854	-0.000239
7855	-0.000211
7856	-0.000223
7857	-0.000221
7858	-0.000207
7859	-0.000182
7860	-0.000192
7861	-0.000228
7862	-0.00026
7863	-0.000279
7864	-0.000245
7865	-0.000223
7866	-0.00021
7867	-0.000211
7868	-0.000207
7869	-0.000197
7870	-0.000212
7871	-0.000224
7872	-0.000225
7873	-0.000221
7874	-0.000237
7875	-0.000245
7876	-0.000262
7877	-0.000252
7878	-0.000267
7879	-0.000258
7880	-0.000246
7881	-0.000215
7882	-0.000173
7883	-0.000172
7884	-0.000233
7885	-0.000308
7886	-0.000347
7887	-0.000373
7888	-0.000361
7889	-0.00036
7890	-0.000354
7891	-0.000384
7892	-0.00038
7893	-0.000349
7894	-0.000298
7895	-0.000258
7896	-0.000232
7897	-0.000202
7898	-0.000159
7899	-0.000126
7900	-0.000114
7901	-9.8e-05
7902	-0.000107
7903	-0.000123
7904	-0.000161
7905	-0.000196
7906	-0.000187
7907	-0.000179
7908	-0.000209
7909	-0.000245
7910	-0.000278
7911	-0.000305
7912	-0.000358
7913	-0.000366
7914	-0.000359
7915	-0.000344
7916	-0.000323
7917	-0.000279
7918	-0.000246
7919	-0.000231
7920	-0.000278
7921	-0.00032
7922	-0.000348
7923	-0.00035
7924	-0.000322
7925	-0.000295
7926	-0.000298
7927	-0.000317
7928	-0.000318
7929	-0.000315
7930	-0.000365
7931	-0.000422
7932	-0.000438
7933	-0.000438
7934	-0.000441
7935	-0.000451
7936	-0.000439
7937	-0.000397
7938	-0.000336
7939	-0.000319
7940	-0.000318
7941	-0.000332
7942	-0.000343
7943	-0.000361
7944	-0.000337
7945	-0.000303
7946	-0.00028
7947	-0.000252
7948	-0.000241
7949	-0.00027
7950	-0.000276
7951	-0.000287
7952	-0.000257
7953	-0.000251
7954	-0.000248
7955	-0.00025
7956	-0.000245
7957	-0.000248
7958	-0.000272
7959	-0.000312
7960	-0.000302
7961	-0.000241
7962	-0.0002
7963	-0.000213
7964	-0.000216
7965	-0.000205
7966	-0.00023
7967	-0.000282
7968	-0.000308
7969	-0.00031
7970	-0.000336
7971	-0.000335
7972	-0.000337
7973	-0.000341
7974	-0.000356
7975	-0.000367
7976	-0.000344
7977	-0.000331
7978	-0.000331
7979	-0.000336
7980	-0.000337
7981	-0.000314
7982	-0.000306
7983	-0.000308
7984	-0.000291
7985	-0.000279
7986	-0.000279
7987	-0.000314
7988	-0.000341
7989	-0.000329
7990	-0.000336
7991	-0.000335
7992	-0.000334
7993	-0.000358
7994	-0.000399
7995	-0.000391
7996	-0.000371
7997	-0.000405
7998	-0.000436
[truncated: 3,401 more rows]

## Sheet: C394L
Time	UV
6000	0.676605
6001	0.67657
6002	0.676774
6003	0.676894
6004	0.676536
6005	0.676164
6006	0.676201
6007	0.676099
6008	0.676698
6009	0.676628
6010	0.676241
6011	0.676365
6012	0.6766
6013	0.676463
6014	0.676825
6015	0.676495
6016	0.676133
6017	0.676128
6018	0.676289
6019	0.676233
6020	0.676331
6021	0.676432
6022	0.676712
6023	0.677019
6024	0.676507
6025	0.676124
6026	0.676202
6027	0.67616
6028	0.676371
6029	0.676618
6030	0.67706
6031	0.676872
6032	0.676459
6033	0.676328
6034	0.676634
6035	0.676377
6036	0.676221
6037	0.676424
6038	0.676477
6039	0.676216
6040	0.676429
6041	0.676521
6042	0.675987
6043	0.676103
6044	0.676139
6045	0.676106
6046	0.676182
6047	0.676308
6048	0.676219
6049	0.676423
6050	0.676712
6051	0.676764
6052	0.676654
6053	0.676435
6054	0.676234
6055	0.676152
6056	0.675909
6057	0.676268
6058	0.676303
6059	0.675981
6060	0.676134
6061	0.6765
6062	0.676701
6063	0.676746
6064	0.676957
6065	0.676788
6066	0.676521
6067	0.676449
6068	0.676433
6069	0.676227
6070	0.676121
6071	0.676423
6072	0.67714
6073	0.677146
6074	0.67709
6075	0.67671
6076	0.676466
6077	0.67669
6078	0.676862
6079	0.676512
6080	0.676127
6081	0.67628
6082	0.676366
6083	0.676092
6084	0.676447
6085	0.676787
6086	0.676923
6087	0.67704
6088	0.676918
6089	0.676576
6090	0.676039
6091	0.676001
6092	0.676339
6093	0.676778
6094	0.676715
6095	0.676306
6096	0.676199
6097	0.676588
6098	0.676681
6099	0.676432
6100	0.676584
6101	0.676691
6102	0.676248
6103	0.676092
6104	0.676776
6105	0.676758
6106	0.676613
6107	0.676937
6108	0.676807
6109	0.676813
6110	0.676482
6111	0.676554
6112	0.67627
6113	0.675771
6114	0.675962
6115	0.676655
6116	0.677019
6117	0.676351
6118	0.675987
6119	0.676186
6120	0.676219
6121	0.676149
6122	0.676648
6123	0.676565
6124	0.676323
6125	0.676494
6126	0.676682
6127	0.676234
6128	0.676131
6129	0.676197
6130	0.676153
6131	0.676156
6132	0.676345
6133	0.676358
6134	0.675895
6135	0.67632
6136	0.67648
6137	0.676571
6138	0.676249
6139	0.676218
6140	0.676723
6141	0.676683
6142	0.675969
6143	0.676056
6144	0.676275
6145	0.67645
6146	0.676538
6147	0.676654
6148	0.676765
6149	0.676632
6150	0.676459
6151	0.676323
6152	0.676685
6153	0.676908
6154	0.676757
6155	0.676803
6156	0.676471
6157	0.676616
6158	0.676661
6159	0.676364
6160	0.67599
6161	0.675885
6162	0.676122
6163	0.67666
6164	0.676894
6165	0.67655
6166	0.676445
6167	0.676326
6168	0.675942
6169	0.676191
6170	0.676259
6171	0.676882
6172	0.676878
6173	0.676543
6174	0.675908
6175	0.675993
6176	0.676048
6177	0.676096
6178	0.676067
6179	0.676265
6180	0.676484
6181	0.676238
6182	0.676139
6183	0.676187
6184	0.67624
6185	0.676254
6186	0.676517
6187	0.676373
6188	0.67598
6189	0.6762
6190	0.67668
6191	0.67654
6192	0.676645
6193	0.676786
6194	0.676684
6195	0.676682
6196	0.676864
6197	0.67684
6198	0.676789
6199	0.676692
6200	0.676316
6201	0.675401
6202	0.675605
6203	0.676204
6204	0.676609
6205	0.67622
6206	0.675771
6207	0.675864
6208	0.67621
6209	0.676222
6210	0.675972
6211	0.676338
6212	0.676249
6213	0.676317
6214	0.676455
6215	0.676625
6216	0.676103
6217	0.675915
6218	0.676286
6219	0.676834
6220	0.676794
6221	0.676863
6222	0.676665
6223	0.676385
6224	0.676038
6225	0.676066
6226	0.676268
6227	0.676341
6228	0.676141
6229	0.675798
6230	0.675558
6231	0.675673
6232	0.675655
6233	0.675849
6234	0.675744
6235	0.675897
6236	0.67627
6237	0.676291
6238	0.676318
6239	0.676042
6240	0
6241	0
6242	-0.000616
6243	-0.00147
6244	-0.002106
6245	-0.002204
6246	-0.002143
6247	-0.001925
6248	-0.001417
6249	-0.001524
6250	-0.00212
6251	-0.002003
6252	-0.001786
6253	-0.00186
6254	-0.002199
6255	-0.002012
6256	-0.002177
6257	-0.002089
6258	-0.002061
6259	-0.001958
6260	-0.002077
6261	-0.002061
6262	-0.002179
6263	-0.002296
6264	-0.001922
6265	-0.001866
6266	-0.002004
6267	-0.002155
6268	-0.002399
6269	-0.002393
6270	-0.001962
6271	-0.001673
6272	-0.001397
6273	-0.001315
6274	-0.001371
6275	-0.001906
6276	-0.002066
6277	-0.002127
6278	-0.002108
6279	-0.002007
6280	-0.001649
6281	-0.001991
6282	-0.002003
6283	-0.001755
6284	-0.001337
6285	-0.00136
6286	-0.001579
6287	-0.001853
6288	-0.002023
6289	-0.001938
6290	-0.00197
6291	-0.001934
6292	-0.001905
6293	-0.001703
6294	-0.001698
6295	-0.001918
6296	-0.002294
6297	-0.002254
6298	-0.002484
6299	-0.00274
6300	-0.002231
6301	-0.001779
6302	-0.001748
6303	-0.001823
6304	-0.002226
6305	-0.002204
6306	-0.002038
6307	-0.001982
6308	-0.002166
6309	-0.001971
6310	-0.001742
6311	-0.001732
6312	-0.001717
6313	-0.001917
6314	-0.002184
6315	-0.002204
6316	-0.001833
6317	-0.001811
6318	-0.001811
6319	-0.001635
6320	-0.002006
6321	-0.001847
6322	-0.001832
6323	-0.00172
6324	-0.001697
6325	-0.001557
6326	-0.001688
6327	-0.001793
6328	-0.001454
6329	-0.001481
6330	-0.002235
6331	-0.002467
6332	-0.002223
6333	-0.001822
6334	-0.001544
6335	-0.001657
6336	-0.001935
6337	-0.001979
6338	-0.002026
6339	-0.002093
6340	-0.001922
6341	-0.001562
6342	-0.001221
6343	-0.001316
6344	-0.001568
6345	-0.001597
6346	-0.001631
6347	-0.001696
6348	-0.001688
6349	-0.001811
6350	-0.001657
6351	-0.001679
6352	-0.001793
6353	-0.001842
6354	-0.001651
6355	-0.001632
6356	-0.001872
6357	-0.001662
6358	-0.001779
6359	-0.002138
6360	-0.002389
6361	-0.002348
6362	-0.002258
6363	-0.002149
6364	-0.002131
6365	-0.002348
6366	-0.002409
6367	-0.002175
6368	-0.001981
6369	-0.001765
6370	-0.001878
6371	-0.002221
6372	-0.001981
6373	-0.001677
6374	-0.001933
6375	-0.001992
6376	-0.001969
6377	-0.002049
6378	-0.002367
6379	-0.002281
6380	-0.001682
6381	-0.001696
6382	-0.002148
6383	-0.002341
6384	-0.001927
6385	-0.001907
6386	-0.001656
6387	-0.001698
6388	-0.001744
6389	-0.001639
6390	-0.001968
6391	-0.00213
6392	-0.001962
6393	-0.001584
6394	-0.001773
6395	-0.001941
6396	-0.001978
6397	-0.001871
6398	-0.001452
6399	-0.00135
6400	-0.001656
6401	-0.002055
6402	-0.002288
6403	-0.002258
6404	-0.001949
6405	-0.001663
6406	-0.00172
6407	-0.001851
6408	-0.001666
6409	-0.001905
6410	-0.002206
6411	-0.002159
6412	-0.002087
6413	-0.002063
6414	-0.001922
6415	-0.001826
6416	-0.001899
6417	-0.001717
6418	-0.001752
6419	-0.001562
6420	-0.001336
6421	-0.001615
6422	-0.001951
6423	-0.001777
6424	-0.001964
6425	-0.001965
6426	-0.00189
6427	-0.002119
6428	-0.002368
6429	-0.002279
6430	-0.002
6431	-0.001767
6432	-0.001755
6433	-0.001495
6434	-0.001504
6435	-0.001563
6436	-0.001785
6437	-0.00198
6438	-0.001927
6439	-0.002133
6440	-0.001597
6441	-0.001413
6442	-0.001912
6443	-0.002264
6444	-0.001729
6445	-0.001485
6446	-0.001464
6447	-0.001489
6448	-0.001517
6449	-0.001457
6450	-0.001679
6451	-0.001733
6452	-0.001161
6453	-0.000934
6454	-0.001296
6455	-0.001542
6456	-0.001433
6457	-0.001642
6458	-0.001925
6459	-0.00206
6460	-0.001845
6461	-0.001848
6462	-0.001735
6463	-0.001358
6464	-0.001314
6465	-0.001684
6466	-0.001493
6467	-0.001334
6468	-0.001526
6469	-0.001765
6470	-0.001703
6471	-0.001718
6472	-0.001845
6473	-0.001502
6474	-0.000878
6475	-0.000731
6476	-0.00078
6477	-0.001141
6478	-0.001869
6479	-0.001905
6480	-0.001772
6481	-0.001693
6482	-0.00145
6483	-0.001278
6484	-0.001298
6485	-0.001944
6486	-0.001905
6487	-0.001722
6488	-0.001244
6489	-0.001232
6490	-0.001512
6491	-0.001546
6492	-0.001305
6493	-0.001415
6494	-0.001528
6495	-0.001885
6496	-0.00187
6497	-0.00145
6498	-0.001278
6499	-0.00129
6500	-0.001189
6501	-0.001436
6502	-0.001578
6503	-0.001171
6504	-0.000857
6505	-0.000476
6506	-0.000758
6507	-0.001146
6508	-0.00126
6509	-0.001386
6510	-0.001408
6511	-0.001236
6512	-0.001176
6513	-0.00115
6514	-0.001551
6515	-0.001823
6516	-0.001992
6517	-0.001991
6518	-0.001817
6519	-0.00107
6520	-0.001179
6521	-0.001758
6522	-0.001868
6523	-0.001692
6524	-0.001433
6525	-0.001801
6526	-0.001787
6527	-0.001492
6528	-0.001755
6529	-0.001608
6530	-0.001553
6531	-0.001183
6532	-0.001455
6533	-0.001625
6534	-0.001453
6535	-0.001342
6536	-0.001402
6537	-0.001303
6538	-0.001421
6539	-0.001168
6540	-0.001687
6541	-0.001914
6542	-0.001867
6543	-0.001692
6544	-0.001712
6545	-0.001615
6546	-0.001609
6547	-0.001518
6548	-0.00119
6549	-0.001352
6550	-0.001434
6551	-0.001549
6552	-0.001601
6553	-0.001557
6554	-0.001629
6555	-0.001677
6556	-0.001511
6557	-0.001278
6558	-0.001382
6559	-0.001878
6560	-0.001907
6561	-0.001787
6562	-0.001808
6563	-0.001187
6564	-0.000948
6565	-0.00176
6566	-0.001416
6567	-0.000768
6568	-0.00113
6569	-0.001509
6570	-0.001281
6571	-0.001295
6572	-0.001414
6573	-0.001561
6574	-0.00121
6575	-0.001046
6576	-0.001109
6577	-0.001057
6578	-0.001237
6579	-0.001686
6580	-0.001617
6581	-0.001305
6582	-0.00113
6583	-0.001379
6584	-0.001407
6585	-0.001238
6586	-0.001387
6587	-0.001407
6588	-0.001813
6589	-0.001943
6590	-0.001837
6591	-0.001622
6592	-0.001476
6593	-0.001211
6594	-0.001026
6595	-0.00138
6596	-0.001546
6597	-0.001624
6598	-0.001605
6599	-0.001343
6600	-0.001372
6601	-0.001458
6602	-0.001539
6603	-0.001045
6604	-0.000689
6605	-0.000822
6606	-0.001401
6607	-0.001663
6608	-0.001742
6609	-0.001465
6610	-0.001602
6611	-0.001927
6612	-0.001816
6613	-0.001206
6614	-0.001024
6615	-0.001139
6616	-0.001213
6617	-0.001489
6618	-0.001252
6619	-0.00147
6620	-0.001326
6621	-0.001249
6622	-0.000992
6623	-0.001274
6624	-0.001587
6625	-0.001534
6626	-0.001476
6627	-0.001127
6628	-0.001051
6629	-0.001186
6630	-0.00156
6631	-0.001698
6632	-0.001557
6633	-0.001377
6634	-0.001476
6635	-0.001491
6636	-0.001064
6637	-0.00026
6638	-0.00029
6639	-0.001023
6640	-0.00136
6641	-0.001826
6642	-0.001598
6643	-0.001426
6644	-0.001484
6645	-0.001664
6646	-0.001699
6647	-0.001464
6648	-0.000877
6649	-0.00095
6650	-0.001654
6651	-0.001815
6652	-0.001771
6653	-0.001795
6654	-0.001304
6655	-0.000957
6656	-0.001043
6657	-0.001083
6658	-0.001158
6659	-0.001217
6660	-0.001502
6661	-0.001254
6662	-0.001422
6663	-0.001324
6664	-0.001694
6665	-0.001874
6666	-0.001582
6667	-0.001181
6668	-0.00136
6669	-0.001394
6670	-0.001435
6671	-0.001529
6672	-0.001697
6673	-0.001463
6674	-0.001463
6675	-0.001375
6676	-0.001684
6677	-0.00154
6678	-0.001335
6679	-0.001386
6680	-0.001336
6681	-0.001127
6682	-0.001225
6683	-0.001537
6684	-0.001533
6685	-0.001351
6686	-0.001057
6687	-0.001454
6688	-0.001237
6689	-0.001212
6690	-0.001536
6691	-0.00155
6692	-0.001295
6693	-0.001427
6694	-0.001675
6695	-0.001346
6696	-0.001674
6697	-0.001899
6698	-0.00204
6699	-0.001864
6700	-0.001557
6701	-0.001574
6702	-0.001775
6703	-0.001709
6704	-0.001068
6705	-0.001293
6706	-0.001552
6707	-0.001564
6708	-0.001527
6709	-0.001681
6710	-0.001947
6711	-0.001886
6712	-0.001252
6713	-0.001267
6714	-0.001257
6715	-0.001009
6716	-0.0012
6717	-0.001359
6718	-0.001456
6719	-0.001469
6720	-0.001449
6721	-0.001517
6722	-0.001937
6723	-0.0013
6724	-0.001102
6725	-0.001166
6726	-0.001587
6727	-0.001575
6728	-0.001299
6729	-0.001354
6730	-0.001625
6731	-0.001424
6732	-0.001196
6733	-0.000964
6734	-0.00104
6735	-0.001684
6736	-0.002126
6737	-0.001584
6738	-0.001415
6739	-0.001347
6740	-0.001188
6741	-0.001101
6742	-0.001514
6743	-0.001886
6744	-0.001911
6745	-0.001548
6746	-0.001354
6747	-0.001466
6748	-0.001289
6749	-0.001627
6750	-0.001289
6751	-0.000909
6752	-0.000602
6753	-0.001359
6754	-0.001916
6755	-0.001549
6756	-0.001529
6757	-0.001544
6758	-0.001481
6759	-0.001098
6760	-0.000875
6761	-0.001286
6762	-0.001304
6763	-0.001353
6764	-0.001545
6765	-0.001871
6766	-0.001959
6767	-0.001813
6768	-0.001495
6769	-0.001286
6770	-0.001251
6771	-0.001416
6772	-0.001144
6773	-0.000982
6774	-0.001317
6775	-0.001621
6776	-0.001249
6777	-0.001001
6778	-0.001121
6779	-0.001527
6780	-0.001697
6781	-0.001809
6782	-0.001886
6783	-0.001649
6784	-0.001238
6785	-0.001023
6786	-0.001333
6787	-0.001359
6788	-0.00142
6789	-0.001753
6790	-0.001952
6791	-0.001842
6792	-0.001487
6793	-0.00153
6794	-0.001582
6795	-0.001762
6796	-0.001653
6797	-0.001017
6798	-0.001175
6799	-0.001581
6800	-0.001532
6801	-0.001323
6802	-0.001099
6803	-0.001283
6804	-0.001535
6805	-0.001769
6806	-0.001721
6807	-0.00169
6808	-0.001638
6809	-0.001706
6810	-0.00164
6811	-0.001729
6812	-0.001881
6813	-0.001646
6814	-0.001274
6815	-0.001168
6816	-0.001389
6817	-0.001722
6818	-0.001816
6819	-0.001776
6820	-0.001727
6821	-0.001418
6822	-0.001392
6823	-0.001615
6824	-0.001774
6825	-0.001541
6826	-0.001461
6827	-0.001863
6828	-0.001827
6829	-0.001716
6830	-0.001543
6831	-0.001267
6832	-0.001413
6833	-0.00094
6834	-0.001103
6835	-0.001387
6836	-0.001495
6837	-0.001431
6838	-0.001381
6839	-0.001754
6840	-0.001754
6841	-0.001675
6842	-0.001219
6843	-0.00075
6844	-0.001148
6845	-0.001523
6846	-0.001567
6847	-0.001525
6848	-0.001717
6849	-0.001956
6850	-0.001494
6851	-0.00096
6852	-0.000886
6853	-0.001402
6854	-0.001543
6855	-0.001586
6856	-0.001404
6857	-0.00125
6858	-0.001374
6859	-0.001445
6860	-0.001491
6861	-0.00161
6862	-0.001548
6863	-0.001208
6864	-0.001047
6865	-0.00165
6866	-0.001461
6867	-0.000905
6868	-0.000669
6869	-0.001431
6870	-0.001857
6871	-0.001644
6872	-0.001043
6873	-0.001135
6874	-0.001727
6875	-0.001968
6876	-0.001838
6877	-0.001566
6878	-0.001657
6879	-0.001546
6880	-0.001086
6881	-0.001271
6882	-0.001438
6883	-0.001333
6884	-0.001328
6885	-0.001643
6886	-0.001808
6887	-0.001769
6888	-0.001609
6889	-0.00138
6890	-0.001404
6891	-0.001541
6892	-0.001237
6893	-0.000741
6894	-0.000941
6895	-0.001198
6896	-0.001536
6897	-0.001636
6898	-0.001533
6899	-0.001214
6900	-0.001206
6901	-0.001633
6902	-0.001342
6903	-0.001178
6904	-0.001396
6905	-0.001597
6906	-0.001873
6907	-0.001773
6908	-0.001987
6909	-0.001694
6910	-0.001843
6911	-0.001689
6912	-0.00161
6913	-0.001968
6914	-0.001999
6915	-0.001896
6916	-0.001646
6917	-0.001433
6918	-0.001822
6919	-0.001828
6920	-0.001534
6921	-0.001258
6922	-0.001042
6923	-0.00132
6924	-0.000945
6925	-0.001003
6926	-0.001134
6927	-0.001414
6928	-0.001531
6929	-0.001585
6930	-0.001744
6931	-0.001865
6932	-0.001757
6933	-0.001361
6934	-0.001615
6935	-0.001573
6936	-0.001478
6937	-0.001571
6938	-0.001624
6939	-0.001134
6940	-0.000812
6941	-0.001265
6942	-0.001579
6943	-0.001371
6944	-0.001084
6945	-0.000774
6946	-0.000959
6947	-0.000745
6948	-0.000892
6949	-0.001137
6950	-0.00151
6951	-0.001938
6952	-0.001284
6953	-0.000764
6954	-0.001367
6955	-0.001681
6956	-0.001361
6957	-0.001184
6958	-0.001081
6959	-0.001375
6960	-0.001744
6961	-0.002192
6962	-0.001701
6963	-0.001034
6964	-0.001057
6965	-0.001155
6966	-0.001232
6967	-0.001397
6968	-0.001313
6969	-0.001263
6970	-0.001415
6971	-0.001607
6972	-0.001337
6973	-0.001192
6974	-0.001495
6975	-0.001596
6976	-0.001511
6977	-0.001708
6978	-0.0016
6979	-0.001414
6980	-0.001527
6981	-0.001499
6982	-0.001998
6983	-0.002065
6984	-0.001786
6985	-0.001508
6986	-0.0014
6987	-0.001288
6988	-0.001254
6989	-0.001253
6990	-0.001267
6991	-0.001385
6992	-0.00152
6993	-0.001568
6994	-0.001914
6995	-0.002147
6996	-0.001491
6997	-0.001244
6998	-0.001756
6999	-0.001945
7000	-0.00154
7001	-0.001156
7002	-0.001473
7003	-0.002069
7004	-0.001436
7005	-0.001232
7006	-0.001312
7007	-0.001468
7008	-0.001495
7009	-0.001672
7010	-0.001517
7011	-0.001585
7012	-0.001671
7013	-0.001419
7014	-0.001164
7015	-0.001313
7016	-0.001488
7017	-0.001585
7018	-0.001556
7019	-0.001702
7020	-0.001639
7021	-0.001093
7022	-0.001004
7023	-0.001471
7024	-0.001524
7025	-0.001324
7026	-0.001351
7027	-0.001328
7028	-0.001199
7029	-0.000899
7030	-0.001274
7031	-0.001139
7032	-0.001019
7033	-0.000852
7034	-0.001159
7035	-0.00134
7036	-0.001199
7037	-0.001896
7038	-0.002111
7039	-0.001691
7040	-0.001396
7041	-0.001814
7042	-0.001773
7043	-0.001607
7044	-0.001502
7045	-0.00167
7046	-0.001386
7047	-0.00154
7048	-0.00147
7049	-0.00145
7050	-0.001279
7051	-0.001585
7052	-0.001383
7053	-0.00085
7054	-0.00049
7055	-0.000495
7056	-0.00089
7057	-0.001247
7058	-0.001649
7059	-0.001227
7060	-0.000867
7061	-0.000967
7062	-0.001106
7063	-0.001364
7064	-0.00146
7065	-0.001547
7066	-0.001578
7067	-0.001802
7068	-0.001276
7069	-0.001185
7070	-0.001662
7071	-0.001651
7072	-0.001561
7073	-0.001356
7074	-0.000947
7075	-0.000989
7076	-0.00158
7077	-0.00169
7078	-0.001017
7079	-0.000695
7080	-0.000854
7081	-0.000786
7082	-0.000712
7083	-0.000918
7084	-0.001254
7085	-0.001147
7086	-0.00127
7087	-0.001426
7088	-0.001287
7089	-0.001091
7090	-0.001084
7091	-0.001432
7092	-0.001453
7093	-0.001228
7094	-0.001272
7095	-0.001436
7096	-0.001414
7097	-0.001726
7098	-0.001907
7099	-0.001642
7100	-0.001231
7101	-0.001713
7102	-0.001789
7103	-0.001627
7104	-0.001694
7105	-0.001859
7106	-0.002196
7107	-0.001879
7108	-0.001921
7109	-0.002079
7110	-0.001713
7111	-0.001203
7112	-0.001264
7113	-0.001398
7114	-0.001519
7115	-0.001274
7116	-0.001246
7117	-0.001303
7118	-0.000879
7119	-0.000188
7120	-0.000655
7121	-0.001451
7122	-0.001284
7123	-0.001084
7124	-0.000859
7125	-0.001136
7126	-0.001251
7127	-0.000852
7128	-0.000904
7129	-0.00152
7130	-0.001544
7131	-0.001712
7132	-0.001554
7133	-0.001203
7134	-0.001133
7135	-0.001364
7136	-0.001624
7137	-0.001425
7138	-0.001151
7139	-0.001138
7140	-0.001337
7141	-0.001182
7142	-0.001296
7143	-0.001499
7144	-0.001762
7145	-0.001496
7146	-0.001317
7147	-0.001501
7148	-0.001453
7149	-0.001806
7150	-0.001536
7151	-0.000996
7152	-0.000939
7153	-0.001269
7154	-0.001451
7155	-0.001705
7156	-0.001616
7157	-0.001334
7158	-0.001357
7159	-0.001686
7160	-0.001534
7161	-0.001035
7162	-0.001073
7163	-0.001363
7164	-0.001813
7165	-0.001714
7166	-0.001701
7167	-0.001454
7168	-0.001127
7169	-0.001027
7170	-0.001048
7171	-0.001377
7172	-0.001669
7173	-0.001736
7174	-0.001697
7175	-0.00167
7176	-0.001936
7177	-0.00172
7178	-0.001724
7179	-0.001503
7180	-0.00145
7181	-0.001338
7182	-0.001334
7183	-0.001208
7184	-0.0011
7185	-0.001181
7186	-0.001273
7187	-0.001323
7188	-0.001328
7189	-0.001524
7190	-0.001831
7191	-0.002147
7192	-0.00166
7193	-0.001266
7194	-0.000778
7195	-0.001326
7196	-0.001616
7197	-0.00158
7198	-0.001223
7199	-0.001296
7200	-0.001361
7201	-0.001004
7202	-0.000846
7203	-0.001272
7204	-0.001689
7205	-0.001503
7206	-0.001277
7207	-0.00098
7208	-0.000974
7209	-0.000976
7210	-0.000831
7211	-0.001007
7212	-0.001355
7213	-0.001546
7214	-0.001313
7215	-0.001252
7216	-0.001174
7217	-0.000911
7218	-0.00085
7219	-0.001235
7220	-0.001666
7221	-0.001663
7222	-0.001641
7223	-0.001832
7224	-0.001571
7225	-0.001211
7226	-0.001348
7227	-0.001114
7228	-0.001533
7229	-0.001976
7230	-0.001804
7231	-0.001488
7232	-0.001111
7233	-0.001084
7234	-0.001316
7235	-0.001587
7236	-0.001749
7237	-0.001671
7238	-0.001265
7239	-0.001567
7240	-0.001847
7241	-0.0021
7242	-0.001618
7243	-0.001416
7244	-0.001414
7245	-0.001484
7246	-0.001437
7247	-0.001846
7248	-0.002195
7249	-0.001916
7250	-0.001571
7251	-0.001557
7252	-0.001021
7253	-0.000944
7254	-0.001341
7255	-0.001284
7256	-0.000764
7257	-0.000618
7258	-0.00094
7259	-0.000998
7260	-0.0011
7261	-0.001448
7262	-0.001381
7263	-0.001435
7264	-0.001248
7265	-0.001432
7266	-0.001646
7267	-0.001191
7268	-0.000919
7269	-0.001588
7270	-0.002083
7271	-0.001945
7272	-0.001754
7273	-0.001499
7274	-0.001137
7275	-0.001059
7276	-0.000844
7277	-0.001009
7278	-0.001151
7279	-0.001601
7280	-0.001832
7281	-0.001807
7282	-0.001584
7283	-0.001004
7284	-0.001038
7285	-0.001277
7286	-0.001747
7287	-0.001645
7288	-0.001481
7289	-0.001116
7290	-0.001435
7291	-0.00191
7292	-0.001867
7293	-0.001656
7294	-0.001794
7295	-0.00165
7296	-0.001481
7297	-0.001183
7298	-0.001332
7299	-0.000978
7300	-0.001209
7301	-0.000984
7302	-0.00118
7303	-0.00148
7304	-0.002114
7305	-0.001671
7306	-0.001227
7307	-0.001079
7308	-0.001004
7309	-0.000955
7310	-0.000988
7311	-0.001638
7312	-0.001451
7313	-0.00122
7314	-0.001408
7315	-0.001797
7316	-0.001959
7317	-0.001847
7318	-0.001575
7319	-0.001462
7320	-0.001112
7321	-0.001104
7322	-0.000862
7323	-0.001018
7324	-0.001829
7325	-0.001559
7326	-0.001149
7327	-0.000979
7328	-0.001422
7329	-0.001697
7330	-0.001552
7331	-0.00171
7332	-0.001787
7333	-0.001777
7334	-0.001854
7335	-0.001923
7336	-0.001444
7337	-0.001406
7338	-0.001342
7339	-0.001688
7340	-0.001509
7341	-0.001247
7342	-0.000787
7343	-0.001111
7344	-0.001098
7345	-0.001431
7346	-0.001589
7347	-0.0015
7348	-0.001575
7349	-0.001298
7350	-0.001019
7351	-0.000933
7352	-0.001218
7353	-0.001323
7354	-0.001205
7355	-0.001758
7356	-0.001849
7357	-0.001254
7358	-0.001482
7359	-0.001513
7360	-0.001601
7361	-0.001612
7362	-0.001588
7363	-0.001388
7364	-0.001295
7365	-0.001638
7366	-0.001712
7367	-0.001394
7368	-0.001532
7369	-0.001547
7370	-0.001313
7371	-0.001227
7372	-0.001293
7373	-0.001474
7374	-0.00176
7375	-0.001422
7376	-0.001226
7377	-0.001222
7378	-0.001161
7379	-0.001419
7380	-0.001541
7381	-0.001676
7382	-0.001383
7383	-0.001167
7384	-0.001217
7385	-0.001413
7386	-0.001506
7387	-0.001637
7388	-0.001563
7389	-0.001653
7390	-0.00155
7391	-0.001605
7392	-0.00177
7393	-0.001656
7394	-0.001277
7395	-0.000936
7396	-0.000836
7397	-0.00115
7398	-0.001838
7399	-0.001507
7400	-0.001439
7401	-0.001446
7402	-0.001182
7403	-0.001245
7404	-0.00143
7405	-0.001528
7406	-0.001359
7407	-0.001497
7408	-0.001391
7409	-0.001613
7410	-0.001799
7411	-0.001852
7412	-0.001418
7413	-0.001223
7414	-0.001402
7415	-0.001773
7416	-0.001506
7417	-0.001556
7418	-0.001362
7419	-0.001534
7420	-0.001598
7421	-0.001186
7422	-0.000885
7423	-0.000971
7424	-0.000809
7425	-0.000877
7426	-0.00116
7427	-0.001572
7428	-0.001843
7429	-0.00161
7430	-0.001556
7431	-0.001686
7432	-0.001465
7433	-0.001223
7434	-0.001368
7435	-0.001525
7436	-0.001425
7437	-0.001019
7438	-0.001154
7439	-0.001522
7440	-0.001451
7441	-0.001601
7442	-0.001703
7443	-0.001541
7444	-0.001172
7445	-0.000831
7446	-0.001106
7447	-0.00127
7448	-0.001255
7449	-0.001213
7450	-0.001108
7451	-0.000987
7452	-0.000635
7453	-0.001059
7454	-0.001404
7455	-0.001355
7456	-0.001172
7457	-0.001077
7458	-0.00099
7459	-0.000866
7460	-0.001004
7461	-0.001289
7462	-0.001257
7463	-0.001383
7464	-0.001302
7465	-0.001373
7466	-0.001753
7467	-0.001466
7468	-0.000818
7469	-0.000954
7470	-0.001043
7471	-0.001003
7472	-0.000456
7473	-0.00104
7474	-0.001205
7475	-0.001129
7476	-0.001182
7477	-0.001063
7478	-0.001021
7479	-0.001008
7480	-0.000955
7481	-0.001047
7482	-0.001155
7483	-0.001652
7484	-0.001626
7485	-0.001722
7486	-0.001594
7487	-0.001361
7488	-0.001227
7489	-0.000951
7490	-0.00068
7491	-0.000893
7492	-0.001099
7493	-0.001304
7494	-0.001234
7495	-0.000892
7496	-0.000763
7497	-0.001114
7498	-0.000839
7499	-0.001024
7500	-0.001023
7501	-0.001317
7502	-0.001198
7503	-0.00105
7504	-0.000773
7505	-0.000574
7506	-0.000691
7507	-0.001179
7508	-0.001185
7509	-0.001023
7510	-0.001031
7511	-0.000754
7512	-0.000904
7513	-0.000887
7514	-0.001195
7515	-0.000681
7516	-0.001065
7517	-0.001303
7518	-0.001072
7519	-0.000936
7520	-0.000707
7521	-0.000683
7522	-0.000405
7523	-0.000506
7524	-0.001136
7525	-0.001378
7526	-0.001044
7527	-0.001274
7528	-0.001002
7529	-0.000743
7530	-0.000736
7531	-0.000817
7532	-0.000576
7533	-0.000877
7534	-0.001054
7535	-0.001245
7536	-0.001216
7537	-0.001391
7538	-0.001296
7539	-0.000927
7540	-0.000889
7541	-0.001148
7542	-0.000969
7543	-0.000702
7544	-0.000567
7545	-0.000499
7546	-0.001078
7547	-0.001233
7548	-0.001072
7549	-0.001065
7550	-0.001164
7551	-0.001034
7552	-0.000751
7553	-0.000619
7554	-0.000455
7555	-0.000746
7556	-0.000494
7557	-0.000363
7558	-0.000689
7559	-0.001063
7560	-0.00128
7561	-0.000764
7562	-0.000488
7563	-0.000287
7564	-0.00021
7565	-0.000318
7566	-0.000653
7567	-0.001046
7568	-0.001149
7569	-0.000944
7570	-0.001016
7571	-0.001281
7572	-0.000634
7573	-0.000457
7574	-0.000251
7575	-0.000751
7576	-0.0009
7577	-0.000512
7578	-0.000511
7579	-0.000684
7580	-0.000848
7581	-0.000684
7582	-0.001136
7583	-0.001249
7584	-0.000855
7585	-0.000903
7586	-0.00131
7587	-0.001336
7588	-0.001044
7589	-0.000946
7590	-0.00095
7591	-0.000744
7592	-0.0007
7593	-0.000893
7594	-0.001286
7595	-0.000943
7596	-0.000862
7597	-0.000917
7598	-0.000831
7599	-0.000562
7600	-0.000757
7601	-0.000939
7602	-0.00104
7603	-0.000887
7604	-0.000604
7605	-0.000843
7606	-0.000863
7607	-0.000643
7608	-0.000951
7609	-0.00076
7610	-0.000855
7611	-0.001049
7612	-0.000772
7613	-0.000912
7614	-0.000995
7615	-0.001001
7616	-0.000845
7617	-0.000273
7618	-0.000494
7619	-0.000753
7620	-0.000872
7621	-0.000579
7622	-0.001016
7623	-0.001227
7624	-0.001293
7625	-0.001342
7626	-0.001177
7627	-0.001191
7628	-0.00085
7629	-0.000829
7630	-0.000982
7631	-0.001251
7632	-0.000895
7633	-0.001137
7634	-0.001129
7635	-0.000935
7636	-0.000628
7637	-0.000508
7638	-0.000857
7639	-0.000804
7640	-0.000739
7641	-0.000393
7642	-0.000711
7643	-0.000434
7644	-0.000671
7645	-0.000778
7646	-0.000711
7647	-0.000907
7648	-0.001049
7649	-0.00114
7650	-0.001082
7651	-0.000845
7652	-0.000692
7653	-0.00107
7654	-0.001233
7655	-0.001157
7656	-0.00116
7657	-0.000971
7658	-0.000678
7659	-0.000882
7660	-0.001209
7661	-0.000981
7662	-0.000922
7663	-0.001004
7664	-0.000897
7665	-0.000989
7666	-0.00107
7667	-0.001481
7668	-0.001501
7669	-0.00118
7670	-0.00086
7671	-0.000751
7672	-0.000823
7673	-0.000859
7674	-0.001116
7675	-0.001094
7676	-0.000798
7677	-0.000781
7678	-0.000932
7679	-0.000925
7680	-0.000663
7681	-0.000837
7682	-0.001243
7683	-0.001404
7684	-0.000968
7685	-0.000997
7686	-0.001047
7687	-0.000914
7688	-0.001208
7689	-0.000823
7690	-0.000686
7691	-0.000705
7692	-0.001129
7693	-0.001396
7694	-0.001479
7695	-0.001369
7696	-0.000961
7697	-0.001763
7698	-0.001902
7699	-0.001321
7700	-0.000873
7701	-0.001189
7702	-0.001144
7703	-0.001189
7704	-0.001397
7705	-0.001028
7706	-0.000809
7707	-0.000443
7708	-0.000522
7709	-0.000795
7710	-0.000704
7711	-0.000789
7712	-0.000723
7713	-0.001031
7714	-0.001223
7715	-0.000681
7716	-0.000799
7717	-0.001091
7718	-0.001019
7719	-0.000722
7720	-0.000892
7721	-0.000712
7722	-0.000654
7723	-0.000916
7724	-0.000932
7725	-0.001431
7726	-0.001437
7727	-0.00146
7728	-0.001043
7729	-0.000913
7730	-0.000549
7731	-0.000672
7732	-0.001025
7733	-0.00116
7734	-0.001123
7735	-0.00122
7736	-0.001321
7737	-0.001492
7738	-0.001077
7739	-0.000926
7740	-0.000764
7741	-0.000883
7742	-0.001122
7743	-0.000917
7744	-0.001281
7745	-0.000823
7746	-0.000749
7747	-0.001142
7748	-0.001268
7749	-0.000664
7750	-0.00043
7751	-0.001114
7752	-0.001353
7753	-0.001123
7754	-0.000966
7755	-0.000796
7756	-0.0009
7757	-0.001369
7758	-0.001685
7759	-0.0015
7760	-0.001179
7761	-0.001103
7762	-0.001439
7763	-0.001336
7764	-0.000754
7765	-0.001043
7766	-0.00144
7767	-0.001617
7768	-0.001356
7769	-0.001189
7770	-0.000933
7771	-0.000896
7772	-0.000798
7773	-0.000985
7774	-0.00113
7775	-0.001154
7776	-0.001179
7777	-0.000933
7778	-0.000823
7779	-0.000793
7780	-0.001006
7781	-0.000966
7782	-0.000805
7783	-0.001025
7784	-0.001043
7785	-0.001249
7786	-0.000944
7787	-0.000891
7788	-0.000943
7789	-0.000928
7790	-0.000838
7791	-0.000594
7792	-0.000625
7793	-0.000728
7794	-0.00086
7795	-0.000723
7796	-0.000832
7797	-0.001141
7798	-0.001279
7799	-0.000886
7800	-0.001192
7801	-0.001467
7802	-0.001273
7803	-0.00099
7804	-0.001254
7805	-0.001233
7806	-0.001094
7807	-0.00096
7808	-0.001402
7809	-0.001514
7810	-0.001266
7811	-0.001
7812	-0.001196
7813	-0.001485
7814	-0.001448
7815	-0.001243
7816	-0.00127
7817	-0.001225
7818	-0.000878
7819	-0.000936
7820	-0.001496
7821	-0.00152
7822	-0.001502
7823	-0.001294
7824	-0.001494
7825	-0.001373
7826	-0.001456
7827	-0.001649
7828	-0.001743
7829	-0.001391
7830	-0.000899
7831	-0.00071
7832	-0.000765
7833	-0.001204
7834	-0.001212
7835	-0.001368
7836	-0.000965
7837	-0.00088
7838	-0.001043
7839	-0.001511
7840	-0.001607
7841	-0.001702
7842	-0.001522
7843	-0.00117
7844	-0.001148
7845	-0.001317
7846	-0.001335
7847	-0.001601
7848	-0.001775
7849	-0.001445
7850	-0.000955
7851	-0.000566
7852	-0.000875
7853	-0.001026
7854	-0.000784
7855	-0.000953
7856	-0.000878
7857	-0.000589
7858	-0.000656
7859	-0.000911
7860	-0.000802
7861	-0.000824
7862	-0.001358
7863	-0.001275
7864	-0.001168
7865	-0.001032
7866	-0.000985
7867	-0.001197
7868	-0.000894
7869	-0.000963
7870	-0.001074
7871	-0.001307
7872	-0.001496
7873	-0.001419
7874	-0.001254
7875	-0.001299
7876	-0.001066
7877	-0.001108
7878	-0.001443
7879	-0.001114
7880	-0.001026
7881	-0.001036
7882	-0.000585
7883	-0.00054
7884	-0.000898
7885	-0.001212
7886	-0.000977
7887	-0.000943
7888	-0.00109
7889	-0.001265
7890	-0.001392
7891	-0.001425
7892	-0.001333
7893	-0.001364
7894	-0.001286
7895	-0.001274
7896	-0.001401
7897	-0.00103
7898	-0.000613
7899	-0.000572
7900	-0.00085
7901	-0.001312
7902	-0.001716
7903	-0.001806
7904	-0.001827
7905	-0.001511
7906	-0.001116
7907	-0.001118
7908	-0.00122
7909	-0.001371
7910	-0.001347
7911	-0.001496
7912	-0.001264
7913	-0.001395
7914	-0.001362
7915	-0.001244
7916	-0.000979
7917	-0.000287
7918	-0.000508
7919	-0.00105
7920	-0.00103
7921	-0.00102
7922	-0.001498
7923	-0.001671
7924	-0.001196
7925	-0.00073
7926	-0.00107
7927	-0.001063
7928	-0.000926
7929	-0.00087
7930	-0.001157
7931	-0.000941
7932	-0.000712
7933	-0.000612
7934	-0.00095
7935	-0.001601
7936	-0.001581
7937	-0.00126
7938	-0.001297
7939	-0.000844
7940	-0.000662
7941	-0.001106
7942	-0.001633
7943	-0.001492
7944	-0.001326
7945	-0.001367
7946	-0.001464
7947	-0.001521
7948	-0.001656
7949	-0.001541
7950	-0.001244
7951	-0.001101
7952	-0.000782
7953	-0.000576
7954	-0.000719
7955	-0.000866
7956	-0.000803
7957	-0.001219
7958	-0.00116
7959	-0.001162
7960	-0.001082
7961	-0.001139
7962	-0.001237
7963	-0.001058
7964	-0.000734
7965	-0.000797
7966	-0.001163
7967	-0.001623
7968	-0.001537
7969	-0.000986
7970	-0.000999
7971	-0.001561
7972	-0.00166
7973	-0.001503
7974	-0.001314
7975	-0.001423
7976	-0.001645
7977	-0.001305
7978	-0.001054
7979	-0.001078
7980	-0.001378
7981	-0.001212
7982	-0.001347
7983	-0.001698
7984	-0.001455
7985	-0.000974
7986	-0.001042
7987	-0.001022
7988	-0.001255
7989	-0.001448
7990	-0.001245
7991	-0.000897
7992	-0.001055
7993	-0.001186
7994	-0.001518
7995	-0.001442
7996	-0.001159
7997	-0.001024
7998	-0.001192
[truncated: 3,401 more rows]

## Sheet: C394V
Time	UV
6000	-0.000291
6001	-0.000516
6002	-0.000693
6003	-0.000651
6004	-0.000357
6005	-0.000135
6006	-0.000149
6007	-0.000183
6008	-0.000633
6009	-0.000669
6010	-0.000623
6011	-0.000473
6012	-0.000537
6013	-0.000927
6014	-0.001061
6015	-0.000675
6016	-0.000378
6017	-0.000509
6018	-0.000595
6019	-0.000677
6020	-0.000318
6021	-0.000715
6022	-0.000757
6023	-0.000723
6024	-0.000779
6025	-0.000655
6026	-0.000639
6027	-0.000749
6028	-0.000835
6029	-0.000864
6030	-0.001058
6031	-0.001143
6032	-0.001015
6033	-0.000778
6034	-0.0009
6035	-0.001002
6036	-0.000884
6037	-0.001021
6038	-0.001067
6039	-0.000787
6040	-0.00066
6041	-0.000678
6042	-0.000712
6043	-0.000574
6044	-5.3e-05
6045	-6.6e-05
6046	-0.000148
6047	-0.000383
6048	-0.00029
6049	-0.000238
6050	-0.000366
6051	-0.000547
6052	-0.000776
6053	-0.000827
6054	-0.000107
6055	3e-06
6056	-0.00074
6057	-0.000698
6058	-0.000365
6059	-0.000194
6060	-0.000126
6061	-0.000438
6062	-0.000527
6063	-0.000925
6064	-0.000919
6065	-0.000757
6066	-0.000573
6067	-0.000503
6068	-0.001058
6069	-0.001086
6070	-0.000789
6071	-0.00051
6072	-0.000357
6073	-0.000235
6074	-0.000626
6075	-0.000702
6076	-0.000642
6077	-0.000917
6078	-0.001037
6079	-0.001087
6080	-0.001154
6081	-0.00095
6082	-0.000702
6083	-0.000321
6084	-0.000627
6085	-0.000592
6086	-0.000541
6087	-0.000769
6088	-0.000948
6089	-0.001125
6090	-0.001019
6091	-0.000747
6092	-0.000399
6093	-0.000332
6094	-0.000273
6095	0.000162
6096	-0.000212
6097	-0.000776
6098	-0.001157
6099	-0.001076
6100	-0.000931
6101	-0.00069
6102	-0.000755
6103	-0.000836
6104	-0.000737
6105	-0.00109
6106	-0.001234
6107	-0.001031
6108	-0.000597
6109	-0.000488
6110	-0.000547
6111	-0.000549
6112	-0.000858
6113	-0.001089
6114	-0.001006
6115	-0.001106
6116	-0.001264
6117	-0.000903
6118	-0.000731
6119	-0.000684
6120	-0.000829
6121	-0.000778
6122	-0.000944
6123	-0.00093
6124	-0.000732
6125	-0.000482
6126	-0.000622
6127	-0.000518
6128	-0.000101
6129	-0.000271
6130	-0.000771
6131	-0.001018
6132	-0.000617
6133	-0.000568
6134	-0.000596
6135	-0.000254
6136	0.000245
6137	-0.000258
6138	-0.000742
6139	-0.000918
6140	-0.000849
6141	-0.000523
6142	-0.000343
6143	-5.8e-05
6144	-0.000323
6145	-0.000722
6146	-0.000582
6147	-0.000137
6148	-0.000106
6149	-0.000384
6150	-0.000302
6151	-2.1e-05
6152	-5.1e-05
6153	-0.000236
6154	-0.000425
6155	-0.000456
6156	-0.000447
6157	-0.000556
6158	-0.000714
6159	-0.000273
6160	-0.000122
6161	-9.7e-05
6162	-0.000288
6163	-0.000433
6164	-0.000467
6165	-0.000546
6166	-0.000818
6167	-0.000574
6168	-0.000331
6169	-0.000478
6170	-0.000674
6171	-0.000943
6172	-0.001089
6173	-0.000834
6174	-0.000719
6175	-0.000944
6176	-0.001199
6177	-0.00084
6178	-0.000251
6179	-0.000138
6180	-0.000474
6181	-0.001221
6182	-0.00117
6183	-0.00075
6184	-0.000703
6185	-0.000973
6186	-0.000591
6187	-0.000718
6188	-0.000632
6189	-0.000604
6190	-0.000173
6191	-0.000361
6192	-0.000891
6193	-0.001097
6194	-0.000872
6195	-0.000945
6196	-0.001331
6197	-0.000966
6198	-0.000711
6199	-0.000699
6200	-0.000848
6201	-0.000813
6202	-0.00062
6203	-0.00073
6204	-0.000831
6205	-0.001025
6206	-0.000984
6207	-0.000861
6208	-0.000941
6209	-0.000282
6210	-0.000278
6211	-0.000547
6212	-0.001028
6213	-0.001155
6214	-0.000812
6215	-0.000658
6216	-0.000918
6217	-0.001151
6218	-0.00084
6219	-0.000315
6220	-0.000562
6221	-0.000828
6222	-0.001216
6223	-0.000804
6224	-0.000723
6225	-0.000894
6226	-0.001011
6227	-0.000786
6228	-0.000905
6229	-0.000511
6230	-0.000435
6231	-0.00036
6232	-0.000864
6233	-0.000886
6234	-0.000752
6235	-0.000679
6236	-0.000897
6237	-0.000844
6238	-0.000713
6239	-0.000659
6240	0
6241	6e-05
6242	0.000128
6243	0.000265
6244	0.000338
6245	-1.3e-05
6246	-0.000294
6247	-0.000427
6248	-0.000596
6249	-0.000375
6250	-0.000127
6251	-0.000362
6252	-0.000305
6253	-0.000184
6254	0.000414
6255	-1e-06
6256	-0.000435
6257	-0.000399
6258	-0.000231
6259	-2e-06
6260	0.000105
6261	0.000242
6262	-0.000183
6263	-0.000204
6264	9e-06
6265	-0.000394
6266	-0.000725
6267	-0.000734
6268	-0.000819
6269	-0.00028
6270	-0.000283
6271	-0.000542
6272	-0.000292
6273	-0.000284
6274	2.6e-05
6275	-0.000192
6276	-0.000286
6277	-0.000398
6278	-0.000141
6279	-5e-06
6280	3.6e-05
6281	-0.000308
6282	0.000177
6283	0.000145
6284	0.000219
6285	0.000275
6286	-0.000259
6287	-0.000619
6288	-0.000667
6289	-0.000647
6290	-0.000495
6291	-0.000106
6292	-6.5e-05
6293	-0.000285
6294	0.000122
6295	0.000241
6296	3.7e-05
6297	-0.00029
6298	-0.000129
6299	-0.000163
6300	9e-05
6301	0.000192
6302	-2.3e-05
6303	0.000103
6304	-1e-05
6305	0.000153
6306	-9.1e-05
6307	-0.000342
6308	0.000123
6309	0.00042
6310	0.00031
6311	0.000357
6312	0.000145
6313	0.0001
6314	-2.9e-05
6315	5.1e-05
6316	0.000162
6317	0.000609
6318	0.000465
6319	-0.00011
6320	-0.000241
6321	-0.000105
6322	1.6e-05
6323	2.4e-05
6324	-0.000573
6325	-0.000684
6326	-0.00078
6327	-0.000624
6328	-0.000388
6329	-0.000138
6330	5e-05
6331	2.1e-05
6332	8.8e-05
6333	5.3e-05
6334	0.000381
6335	0.000301
6336	-0.000203
6337	-0.000404
6338	-0.000262
6339	-6.3e-05
6340	0.000379
6341	0.000352
6342	-8.9e-05
6343	-0.000254
6344	-0.000128
6345	0.000104
6346	0.000369
6347	0.000552
6348	0.000219
6349	-0.00027
6350	-0.00041
6351	-9.9e-05
6352	0.000317
6353	-5.1e-05
6354	-0.000393
6355	-0.000382
6356	5.9e-05
6357	-0.000134
6358	-4.1e-05
6359	-2.5e-05
6360	0.0001
6361	-0.000102
6362	-0.000327
6363	-0.000146
6364	-0.000251
6365	-0.000455
6366	-0.000609
6367	-0.000669
6368	-0.000672
6369	-0.000306
6370	1.7e-05
6371	0.000289
6372	-0.000155
6373	-2.7e-05
6374	4.7e-05
6375	-0.000111
6376	-0.000609
6377	-0.00031
6378	-0.000101
6379	0.000361
6380	0.0005
6381	0.000114
6382	-0.00033
6383	-0.000191
6384	-0.00031
6385	-0.000272
6386	0.000188
6387	0.000128
6388	3.4e-05
6389	0.000317
6390	0.000454
6391	0.000227
6392	0.000199
6393	7.7e-05
6394	-9.1e-05
6395	-9.8e-05
6396	-0.000101
6397	-0.000115
6398	-0.000314
6399	-0.00036
6400	-0.000261
6401	-5.2e-05
6402	0.000173
6403	2.4e-05
6404	4.6e-05
6405	-0.000166
6406	-0.000162
6407	0.000125
6408	0.00028
6409	0.000117
6410	-0.00013
6411	-6.9e-05
6412	0.000173
6413	9.6e-05
6414	-0.000116
6415	-0.000146
6416	-6e-05
6417	-0.000486
6418	-0.000605
6419	-0.000438
6420	-0.000286
6421	-0.000237
6422	-0.000368
6423	-0.000513
6424	-0.000632
6425	-0.000182
6426	0.000112
6427	0.000161
6428	0.000158
6429	0.000398
6430	0.000148
6431	0.000422
6432	0.000497
6433	0.000388
6434	0.000253
6435	0.000214
6436	0.000133
6437	-6.7e-05
6438	0.000116
6439	8e-06
6440	0.000124
6441	0.000214
6442	0.000229
6443	0.000154
6444	-0.000129
6445	-0.000113
6446	-0.000492
6447	-0.000519
6448	-0.000359
6449	-0.000314
6450	-0.000131
6451	-0.000223
6452	-0.000283
6453	-0.000393
6454	-0.000189
6455	-0.000212
6456	-0.000564
6457	-0.000646
6458	-0.000213
6459	0.000228
6460	0.000226
6461	0.000243
6462	-0.000139
6463	-0.000358
6464	-8.8e-05
6465	0.000181
6466	0.000455
6467	-0.000207
6468	-0.000245
6469	-0.000333
6470	-0.000274
6471	8.8e-05
6472	0.000397
6473	0.000388
6474	0.000272
6475	-0.000178
6476	-0.000314
6477	-0.000207
6478	-0.000177
6479	-0.000328
6480	0.000105
6481	0.000585
6482	0.000644
6483	0.000325
6484	5.9e-05
6485	-0.000324
6486	-0.000611
6487	-0.000673
6488	-0.000349
6489	-0.000192
6490	-0.000229
6491	-0.000399
6492	-0.000419
6493	-3.8e-05
6494	2.7e-05
6495	-5.8e-05
6496	-0.000168
6497	6.2e-05
6498	-0.000121
6499	-0.000145
6500	-1.8e-05
6501	-2.1e-05
6502	0.000365
6503	0.000583
6504	-0.000106
6505	5e-05
6506	0.000468
6507	0.000786
6508	0.00039
6509	2.8e-05
6510	-8.7e-05
6511	-0.000273
6512	-0.000134
6513	-0.000116
6514	-0.000327
6515	-0.000239
6516	0.000193
6517	0.000489
6518	0.00057
6519	-4.1e-05
6520	-0.000576
6521	-0.000524
6522	-0.000477
6523	-0.000134
6524	-0.000438
6525	-0.000591
6526	-0.000109
6527	-9e-06
6528	-0.00028
6529	-7.1e-05
6530	0.00014
6531	-0.000187
6532	-0.000209
6533	0.000111
6534	-7.1e-05
6535	-2.9e-05
6536	0.000429
6537	0.000295
6538	-2.2e-05
6539	4.7e-05
6540	-1.9e-05
6541	3.6e-05
6542	8.9e-05
6543	4.5e-05
6544	0.000121
6545	0.000168
6546	0.000409
6547	0.000295
6548	5.6e-05
6549	-0.000319
6550	-0.000573
6551	-0.000396
6552	-0.000333
6553	-7.3e-05
6554	5.7e-05
6555	-0.000101
6556	-0.00045
6557	-0.000624
6558	-0.00044
6559	-0.000185
6560	-0.000114
6561	-0.000327
6562	-0.00068
6563	-0.000484
6564	-0.000158
6565	-0.000114
6566	0.000352
6567	0.000261
6568	-2.7e-05
6569	-0.00029
6570	-0.000156
6571	-2.4e-05
6572	-0.000106
6573	1.8e-05
6574	2.5e-05
6575	1.5e-05
6576	-0.000122
6577	-4.6e-05
6578	0.000171
6579	0.000158
6580	-0.000151
6581	-2.3e-05
6582	-3.7e-05
6583	-0.000371
6584	-0.000619
6585	-0.000687
6586	-0.000575
6587	-0.000449
6588	-0.000469
6589	-0.000293
6590	-0.000346
6591	-0.000762
6592	-0.000696
6593	-0.00011
6594	0.000734
6595	0.000699
6596	-0.000191
6597	-0.000585
6598	-0.000458
6599	-9.4e-05
6600	-0.0001
6601	-0.000303
6602	0.00031
6603	0.000541
6604	0.000172
6605	-0.000243
6606	0.000126
6607	0.000312
6608	-0.000225
6609	-0.00044
6610	-0.000107
6611	0.000146
6612	4.4e-05
6613	6.9e-05
6614	7.9e-05
6615	-3.9e-05
6616	-0.000291
6617	-0.000112
6618	-0.000471
6619	-0.001
6620	-0.000778
6621	-0.000336
6622	-0.000159
6623	-0.000188
6624	-0.00014
6625	-0.000194
6626	0.000127
6627	0.000131
6628	4.8e-05
6629	0.000141
6630	5e-06
6631	-0.000118
6632	-6.4e-05
6633	9.4e-05
6634	0.000116
6635	5.4e-05
6636	-0.000169
6637	-0.000544
6638	-0.000415
6639	-0.000228
6640	-4.5e-05
6641	7.5e-05
6642	-0.000187
6643	-0.00024
6644	-0.000239
6645	-0.000616
6646	-0.000431
6647	-0.000146
6648	0.000176
6649	0.000235
6650	0.000421
6651	-4e-06
6652	-0.000273
6653	-0.000484
6654	-0.000197
6655	-2.2e-05
6656	0.0001
6657	-0.000158
6658	-0.000175
6659	7.4e-05
6660	0.000166
6661	-0.0001
6662	0.00025
6663	0.000594
6664	0.00022
6665	-0.000108
6666	-0.000107
6667	0.000412
6668	0.000525
6669	7.1e-05
6670	-8.2e-05
6671	-5.4e-05
6672	0.000345
6673	0.00027
6674	0.000171
6675	-1.7e-05
6676	-0.000188
6677	0.000116
6678	0.000368
6679	0.000209
6680	-0.000313
6681	-0.00024
6682	-0.000222
6683	-0.000322
6684	-0.000237
6685	-6.3e-05
6686	1.1e-05
6687	-0.000203
6688	-0.000248
6689	-0.000491
6690	-0.000466
6691	-0.000603
6692	-0.000346
6693	-0.00047
6694	-0.000244
6695	0.000178
6696	-4.3e-05
6697	-0.000269
6698	-0.000223
6699	-2e-06
6700	-4.3e-05
6701	-0.000115
6702	-6.8e-05
6703	-0.000272
6704	-0.000349
6705	9.8e-05
6706	0.000474
6707	0.000404
6708	-7.7e-05
6709	-0.000134
6710	0.000108
6711	-7.3e-05
6712	-0.000343
6713	1.6e-05
6714	0.000374
6715	0.000303
6716	-9e-05
6717	-0.000496
6718	-0.000778
6719	-0.000526
6720	-0.000144
6721	-0.000197
6722	-0.000323
6723	-0.000112
6724	-1.8e-05
6725	0.000146
6726	-5.2e-05
6727	-0.000112
6728	8.8e-05
6729	0.000354
6730	2.8e-05
6731	0.000118
6732	0.000121
6733	2.8e-05
6734	-0.000167
6735	-9.7e-05
6736	2.1e-05
6737	0.000125
6738	0.000187
6739	0.000126
6740	0.000155
6741	-0.000159
6742	-0.000357
6743	-0.000552
6744	-0.000719
6745	-0.000376
6746	-0.000515
6747	-0.000351
6748	-0.000194
6749	-0.000307
6750	-7.7e-05
6751	9.4e-05
6752	0.0001
6753	-0.000237
6754	-0.000344
6755	-5.7e-05
6756	-0.000157
6757	-0.000137
6758	0.000477
6759	0.000586
6760	0.000102
6761	2.4e-05
6762	0.000386
6763	0.000273
6764	0.000238
6765	-7.4e-05
6766	0.000128
6767	8.7e-05
6768	4.6e-05
6769	-2.3e-05
6770	7.3e-05
6771	-4e-06
6772	-0.00035
6773	-0.000212
6774	-0.000361
6775	-3.5e-05
6776	0.000201
6777	0.000125
6778	-0.000226
6779	-0.000423
6780	-0.0002
6781	-0.000302
6782	2.7e-05
6783	9.2e-05
6784	-0.000197
6785	-8.8e-05
6786	8e-06
6787	0.0001
6788	0.000119
6789	-0.000158
6790	-0.000614
6791	-0.000675
6792	-0.000473
6793	-0.000653
6794	-0.000885
6795	-0.000576
6796	-0.000297
6797	-0.000276
6798	-0.000385
6799	-0.000142
6800	0.000239
6801	-1.9e-05
6802	-0.000555
6803	-0.00063
6804	-0.000487
6805	-0.000207
6806	8e-06
6807	-1.6e-05
6808	-0.000492
6809	-0.00027
6810	-4.6e-05
6811	-0.000146
6812	-0.000198
6813	-0.000283
6814	-2e-05
6815	0.000371
6816	0.000227
6817	-0.000129
6818	-0.0001
6819	-0.000279
6820	4.8e-05
6821	0.000262
6822	3.9e-05
6823	-0.000386
6824	-0.000951
6825	-0.000791
6826	-0.000504
6827	-0.0001
6828	-7e-05
6829	-0.000271
6830	-0.000369
6831	-0.000339
6832	-0.000102
6833	-1.8e-05
6834	1.1e-05
6835	0
6836	0.000301
6837	0.000175
6838	0.000161
6839	8.5e-05
6840	-3e-05
6841	-0.000275
6842	8.3e-05
6843	0.000192
6844	-2.1e-05
6845	-0.00017
6846	9.3e-05
6847	0.000226
6848	-0.000188
6849	-0.000451
6850	-0.000272
6851	-6.2e-05
6852	-6.6e-05
6853	-0.000138
6854	-2.7e-05
6855	0.000168
6856	0.000179
6857	2.3e-05
6858	-0.000415
6859	-0.000261
6860	-0.000304
6861	-0.000126
6862	6.8e-05
6863	0.000355
6864	0.000616
6865	0.000423
6866	-0.000106
6867	-0.000441
6868	-0.000187
6869	-0.00037
6870	-0.000167
6871	5.1e-05
6872	-0.000126
6873	6.6e-05
6874	0.000141
6875	0.00013
6876	2e-05
6877	4.9e-05
6878	9.2e-05
6879	0.000223
6880	0.000159
6881	0.00035
6882	0.000314
6883	0.000228
6884	0.000152
6885	-0.00012
6886	-0.000306
6887	-0.000219
6888	-0.000153
6889	7.3e-05
6890	0.000378
6891	0.000135
6892	-0.000102
6893	-0.000277
6894	-0.00037
6895	-0.000491
6896	-0.000508
6897	-0.000647
6898	-0.000208
6899	0.000348
6900	0.000167
6901	-5.6e-05
6902	-5.1e-05
6903	-0.000422
6904	-0.000289
6905	-0.000147
6906	0.000272
6907	0.000194
6908	0.000319
6909	-4.5e-05
6910	-0.000544
6911	-0.000704
6912	-0.000535
6913	-3.9e-05
6914	0.000146
6915	-2e-05
6916	-0.000295
6917	-0.000162
6918	9.8e-05
6919	-5.3e-05
6920	7e-06
6921	7.4e-05
6922	0.000661
6923	0.000513
6924	0.000192
6925	1.6e-05
6926	0.000104
6927	0.000319
6928	-0.000165
6929	-0.000431
6930	-0.000478
6931	-0.000172
6932	0.000213
6933	0.000333
6934	0.000315
6935	0.00027
6936	-9.2e-05
6937	-0.000676
6938	-0.000576
6939	-0.000163
6940	0.000259
6941	0.000441
6942	0.00036
6943	0.000493
6944	9.9e-05
6945	-0.000455
6946	-0.000478
6947	-0.000369
6948	8.6e-05
6949	-0.000139
6950	-0.000592
6951	-0.00066
6952	-0.000389
6953	3.4e-05
6954	-0.000176
6955	-0.000134
6956	-0.000418
6957	-0.000681
6958	-0.000653
6959	-0.000301
6960	-1.4e-05
6961	-0.000203
6962	4.6e-05
6963	0.00013
6964	7.7e-05
6965	0.000253
6966	0.000454
6967	0.000314
6968	0.000137
6969	-5e-05
6970	0.000195
6971	0.00028
6972	5e-06
6973	-0.000213
6974	-0.000446
6975	-0.000375
6976	-0.0001
6977	-0.000256
6978	-0.000305
6979	-0.000146
6980	0.000114
6981	-1.3e-05
6982	0.000382
6983	0.000151
6984	-0.000146
6985	-0.000372
6986	-0.000525
6987	-0.000352
6988	0.000107
6989	0.000574
6990	0.000529
6991	0.000347
6992	0.000356
6993	-0.000273
6994	-0.000518
6995	-0.000598
6996	-0.00023
6997	-0.000235
6998	-5.3e-05
6999	4.2e-05
7000	0.000306
7001	0.000203
7002	0.000368
7003	1.6e-05
7004	0.000157
7005	0.000116
7006	3.6e-05
7007	-0.000323
7008	-0.000436
7009	-0.000571
7010	-0.000304
7011	-9e-05
7012	-3.5e-05
7013	-0.000149
7014	-0.000171
7015	-0.000173
7016	-0.000257
7017	-0.000267
7018	-0.000117
7019	-0.000271
7020	2.3e-05
7021	3.6e-05
7022	-0.000598
7023	-0.000775
7024	-0.000259
7025	0.000126
7026	5.4e-05
7027	0.000238
7028	1.6e-05
7029	-4.3e-05
7030	0.000443
7031	0.000353
7032	0.000175
7033	2.9e-05
7034	4e-06
7035	0.000204
7036	5.9e-05
7037	-0.000198
7038	-0.000488
7039	-0.000252
7040	6.3e-05
7041	-0.000128
7042	-0.000225
7043	-0.000127
7044	-5.2e-05
7045	-0.000242
7046	-0.000229
7047	-8e-05
7048	0.000152
7049	0.000415
7050	8.5e-05
7051	-0.000206
7052	-0.000406
7053	-0.000211
7054	-0.000315
7055	-0.000403
7056	-0.000273
7057	0.000103
7058	-0.000132
7059	-0.00017
7060	0.00048
7061	0.000789
7062	0.000466
7063	-0.000608
7064	-0.000428
7065	-0.000271
7066	2.7e-05
7067	0.000207
7068	0.00024
7069	0.000266
7070	7e-06
7071	-0.000752
7072	-0.000689
7073	-0.000533
7074	-0.000668
7075	-0.0007
7076	-0.00044
7077	-0.000217
7078	0.000156
7079	4.9e-05
7080	-0.000469
7081	-0.000422
7082	-0.000548
7083	-0.000176
7084	8.2e-05
7085	0.000356
7086	0.000132
7087	-5.4e-05
7088	-3.6e-05
7089	-0.000112
7090	-0.000239
7091	-1.3e-05
7092	7.4e-05
7093	0.000336
7094	0.000313
7095	-1.7e-05
7096	-0.000326
7097	-0.000448
7098	-0.000378
7099	-0.000134
7100	-0.000371
7101	-0.000656
7102	-0.000793
7103	-0.000527
7104	-0.000478
7105	-0.000111
7106	-4e-05
7107	-0.000171
7108	-0.000296
7109	-0.000288
7110	-0.000224
7111	-3.2e-05
7112	-0.000172
7113	-0.000443
7114	-0.000605
7115	-0.000432
7116	-0.000348
7117	6.2e-05
7118	-0.000113
7119	-0.000189
7120	-0.0001
7121	4.1e-05
7122	-3.5e-05
7123	2.9e-05
7124	9.7e-05
7125	-4.1e-05
7126	-0.000227
7127	4.8e-05
7128	-0.00013
7129	-0.000406
7130	-0.000274
7131	-6.3e-05
7132	2.1e-05
7133	-7.9e-05
7134	-2.1e-05
7135	5.4e-05
7136	-0.000221
7137	-9.5e-05
7138	0.000308
7139	3.1e-05
7140	-8.8e-05
7141	-0.000144
7142	-0.000341
7143	-0.000154
7144	0.000143
7145	-0.000299
7146	-0.000276
7147	0.000285
7148	0.000704
7149	0.000288
7150	-0.000285
7151	-0.000711
7152	-0.000581
7153	-0.000604
7154	-0.000423
7155	-0.000231
7156	-0.00016
7157	1.7e-05
7158	0.000136
7159	5e-05
7160	-0.000264
7161	-8e-05
7162	-9.7e-05
7163	-0.000191
7164	-0.000451
7165	-0.000736
7166	-0.001025
7167	-0.000902
7168	-0.000531
7169	-0.000344
7170	-8.7e-05
7171	-9.7e-05
7172	-0.000197
7173	-0.00017
7174	6.2e-05
7175	4.8e-05
7176	-7.4e-05
7177	-0.000358
7178	-0.000495
7179	-0.000332
7180	2.8e-05
7181	2e-06
7182	-0.000439
7183	-0.000694
7184	-0.000617
7185	-0.000464
7186	-0.000546
7187	-0.000528
7188	-0.000435
7189	2.1e-05
7190	0.0002
7191	0.000225
7192	0.000328
7193	0.000137
7194	-0.000212
7195	-0.0003
7196	-7.2e-05
7197	-0.000212
7198	-0.000503
7199	-0.000192
7200	-0.000106
7201	-0.00033
7202	-0.000777
7203	-0.000567
7204	-0.000248
7205	-4.6e-05
7206	0.000174
7207	4.1e-05
7208	2.4e-05
7209	-0.00046
7210	-0.00026
7211	-7e-06
7212	9.6e-05
7213	-0.000303
7214	-0.0004
7215	-9.3e-05
7216	4.3e-05
7217	0.000323
7218	0.00023
7219	6e-06
7220	0.000136
7221	-2.5e-05
7222	-9.4e-05
7223	-0.000195
7224	6.2e-05
7225	4.3e-05
7226	5.4e-05
7227	-7.1e-05
7228	6.8e-05
7229	6.5e-05
7230	-0.000296
7231	-0.000406
7232	-0.000335
7233	-0.000281
7234	-0.0002
7235	-1.3e-05
7236	-0.000314
7237	-0.000447
7238	-0.000356
7239	0.000126
7240	0.000193
7241	0.000412
7242	0.000387
7243	4.4e-05
7244	-0.000212
7245	-0.000307
7246	-0.000429
7247	-0.000225
7248	0.000519
7249	0.000804
7250	0.000303
7251	0.000464
7252	0.000269
7253	0.000432
7254	0.000633
7255	0.000291
7256	0.0003
7257	-0.000169
7258	-0.000126
7259	8.7e-05
7260	0.000204
7261	0.000194
7262	0.000367
7263	0.000443
7264	0.000429
7265	0.00032
7266	-1.2e-05
7267	-0.000241
7268	-0.00024
7269	-0.000351
7270	-0.000259
7271	0.000374
7272	0.00075
7273	0.000582
7274	0.000249
7275	0.000257
7276	0.000111
7277	-0.000161
7278	3.3e-05
7279	0.000112
7280	-3.8e-05
7281	-0.000312
7282	-0.000133
7283	5.4e-05
7284	-8.4e-05
7285	-7.3e-05
7286	-5.7e-05
7287	0.000317
7288	0.00013
7289	0.0003
7290	0.000102
7291	2.9e-05
7292	5.3e-05
7293	6.1e-05
7294	0.000108
7295	-0.000124
7296	-0.00011
7297	0.000354
7298	8.4e-05
7299	-1.6e-05
7300	-0.000725
7301	-0.001075
7302	-0.000529
7303	0.000157
7304	6.1e-05
7305	-4e-05
7306	-0.000321
7307	-0.00043
7308	-0.0004
7309	-0.000115
7310	-7e-05
7311	-0.000315
7312	-0.00045
7313	-0.000412
7314	-0.000485
7315	-0.000659
7316	-0.000567
7317	-0.00045
7318	-0.000287
7319	0.000113
7320	5.9e-05
7321	-5.6e-05
7322	-0.0001
7323	0.000366
7324	0.000276
7325	-3.1e-05
7326	-0.000605
7327	-0.000789
7328	-0.000877
7329	-0.000692
7330	-0.000333
7331	-0.000289
7332	-5.1e-05
7333	1.5e-05
7334	0.000338
7335	0.000484
7336	0.000589
7337	0.000523
7338	0.000376
7339	0.000147
7340	-2.6e-05
7341	-1.4e-05
7342	-3.4e-05
7343	7.1e-05
7344	0.000252
7345	0.000277
7346	0.000596
7347	0.0004
7348	-0.000187
7349	1.3e-05
7350	0.000138
7351	-0.000222
7352	-4.6e-05
7353	0.000126
7354	-0.00028
7355	-0.000437
7356	-0.00029
7357	0.000396
7358	0.000204
7359	-0.000134
7360	-0.000275
7361	-0.00013
7362	-2.4e-05
7363	-0.000331
7364	-0.000449
7365	-1e-06
7366	-0.000116
7367	-9.5e-05
7368	1.3e-05
7369	0.000177
7370	-5.7e-05
7371	0.000105
7372	0.000555
7373	0.000523
7374	0.000145
7375	0.000276
7376	9e-06
7377	-0.000369
7378	-0.000108
7379	-0.000105
7380	-1.3e-05
7381	-6.8e-05
7382	-7.6e-05
7383	-0.000177
7384	-0.000471
7385	-0.000851
7386	-0.000711
7387	-7.6e-05
7388	2.1e-05
7389	0.0003
7390	0.000274
7391	0.00019
7392	-8.5e-05
7393	-7.9e-05
7394	-0.000292
7395	-0.000467
7396	-0.000184
7397	9.5e-05
7398	-0.000192
7399	-0.000229
7400	-0.000224
7401	-0.00016
7402	7.4e-05
7403	0.000153
7404	-0.000191
7405	0.000322
7406	0.000607
7407	0.000208
7408	-0.000172
7409	-0.00023
7410	-0.000262
7411	7.7e-05
7412	0.000635
7413	0.00074
7414	0.000281
7415	-0.000239
7416	-0.000555
7417	-0.000301
7418	-0.000175
7419	0.000183
7420	0.000213
7421	-7.8e-05
7422	-0.000346
7423	-0.000276
7424	-0.000184
7425	-0.000186
7426	-0.000189
7427	3e-06
7428	0.000226
7429	0.000151
7430	0.000158
7431	0.000115
7432	-0.000257
7433	-8.4e-05
7434	6.1e-05
7435	0.000166
7436	0.000278
7437	0.000381
7438	0.000164
7439	-0.000116
7440	-0.000208
7441	-5.6e-05
7442	0.000148
7443	5.7e-05
7444	-6.2e-05
7445	-0.000119
7446	0.000231
7447	0.00017
7448	0.000349
7449	0.000274
7450	7.8e-05
7451	1.8e-05
7452	2.4e-05
7453	-9.1e-05
7454	-0.000144
7455	-0.000356
7456	-3.7e-05
7457	-2.2e-05
7458	-1.3e-05
7459	-0.000122
7460	1.8e-05
7461	-0.000105
7462	-0.000503
7463	-0.000628
7464	-0.000257
7465	1.4e-05
7466	-0.000161
7467	0.000232
7468	0.000601
7469	0.000399
7470	-0.000101
7471	-0.000164
7472	-0.000315
7473	2.3e-05
7474	0.000193
7475	0.000227
7476	0.000145
7477	0.000172
7478	6.1e-05
7479	-0.000146
7480	-0.000519
7481	-0.000478
7482	-0.000279
7483	9.2e-05
7484	0.000253
7485	-8e-06
7486	-0.000307
7487	-6.2e-05
7488	0.00012
7489	0.000131
7490	-0.000208
7491	-0.000184
7492	-8e-05
7493	-5e-05
7494	-0.000145
7495	-7e-06
7496	-3.8e-05
7497	-0.000293
7498	-1.3e-05
7499	0.000211
7500	-4e-06
7501	-9.3e-05
7502	-9.4e-05
7503	0.000127
7504	0.00023
7505	0.000101
7506	-0.0002
7507	-5.6e-05
7508	-0.000131
7509	-0.00025
7510	-0.000101
7511	0.000328
7512	0.000233
7513	1.4e-05
7514	9.1e-05
7515	-0.000139
7516	0.000105
7517	0.000306
7518	0.000516
7519	0.000368
7520	0.000176
7521	0.000463
7522	0.000494
7523	0.000317
7524	0.000384
7525	0.000283
7526	0.000462
7527	0.000469
7528	6.7e-05
7529	-0.000322
7530	-0.000369
7531	-0.000224
7532	-0.000283
7533	-0.000298
7534	-0.000358
7535	-0.000669
7536	-0.000564
7537	-0.00029
7538	-0.000306
7539	-0.000379
7540	-0.000121
7541	-0.000254
7542	3.7e-05
7543	0.000114
7544	0.000244
7545	0.000292
7546	3.2e-05
7547	-0.000458
7548	-9.1e-05
7549	0.000333
7550	4.7e-05
7551	-0.000291
7552	-5.8e-05
7553	0.00038
7554	0.000432
7555	0.000103
7556	-0.000415
7557	-0.000329
7558	-0.000183
7559	-0.000544
7560	-0.000402
7561	-5e-05
7562	0.000182
7563	-4.1e-05
7564	-0.000227
7565	-0.00012
7566	-6.3e-05
7567	-0.000128
7568	-0.000555
7569	-0.000465
7570	-0.000141
7571	-1.7e-05
7572	-0.000378
7573	0.000177
7574	2e-05
7575	-0.000169
7576	-7.2e-05
7577	5.3e-05
7578	0.000314
7579	0.000204
7580	0.000601
7581	0.000576
7582	0.000501
7583	2.5e-05
7584	0.000138
7585	6.6e-05
7586	-0.000382
7587	-0.000307
7588	-0.000213
7589	-0.000191
7590	-0.000234
7591	-0.000167
7592	-2.4e-05
7593	-3.1e-05
7594	-1.4e-05
7595	-2.8e-05
7596	6.4e-05
7597	9e-05
7598	-9e-05
7599	-0.000381
7600	6.7e-05
7601	1e-06
7602	-0.000108
7603	7.3e-05
7604	0.000168
7605	0.000172
7606	-1.6e-05
7607	0.000261
7608	8.3e-05
7609	-0.000213
7610	-4.6e-05
7611	-4.2e-05
7612	-0.000352
7613	-6.7e-05
7614	-9e-06
7615	-0.00016
7616	-0.000202
7617	-0.000168
7618	0.000208
7619	0.000557
7620	0.000768
7621	0.000413
7622	4.1e-05
7623	-0.000289
7624	-0.000534
7625	2.9e-05
7626	0.000145
7627	0.000538
7628	0.000413
7629	-0.000382
7630	-0.000436
7631	0.000236
7632	0.000552
7633	0.000328
7634	-1.8e-05
7635	0.000207
7636	0.000276
7637	0.00057
7638	0.000825
7639	0.000318
7640	-0.00014
7641	-0.000107
7642	-0.000104
7643	-0.0004
7644	-0.000722
7645	-0.00048
7646	-0.000193
7647	-0.000221
7648	-0.000506
7649	-3e-06
7650	0.000157
7651	0.000244
7652	0.000417
7653	-0.000358
7654	-0.000636
7655	-0.000183
7656	0.000309
7657	0.000219
7658	0.000482
7659	0.000554
7660	0.000234
7661	0.000173
7662	-0.000132
7663	-0.000203
7664	-0.000185
7665	-2.6e-05
7666	0.000174
7667	0.000213
7668	0.000155
7669	0.000113
7670	-0.000441
7671	-0.000407
7672	-0.00025
7673	-4.8e-05
7674	6.3e-05
7675	-9.3e-05
7676	0.000215
7677	0.000337
7678	0.000222
7679	-0.000324
7680	6.3e-05
7681	0.000169
7682	0.00017
7683	0.000498
7684	0.000146
7685	6.6e-05
7686	0.000303
7687	0.000382
7688	1.2e-05
7689	0.000173
7690	0.000204
7691	-3.1e-05
7692	-8.5e-05
7693	0.000114
7694	-0.000337
7695	-0.000352
7696	-0.000417
7697	-0.000299
7698	-4.4e-05
7699	3e-05
7700	-0.000141
7701	-0.000316
7702	-0.000139
7703	-0.000166
7704	-7.9e-05
7705	0.000138
7706	0.000108
7707	-0.000154
7708	-0.000233
7709	-5.8e-05
7710	-3.9e-05
7711	-5.2e-05
7712	0.000206
7713	0.00014
7714	-9.5e-05
7715	3.6e-05
7716	-0.000226
7717	1.8e-05
7718	3.3e-05
7719	0.000454
7720	9.1e-05
7721	-0.000402
7722	-0.000303
7723	0.000159
7724	0.000103
7725	-0.000227
7726	-0.000243
7727	-6.9e-05
7728	0.00029
7729	0.000141
7730	0.000147
7731	0.000216
7732	6e-06
7733	-0.000235
7734	-0.0003
7735	-0.00016
7736	-4.6e-05
7737	-7.1e-05
7738	-0.000103
7739	-0.000106
7740	6.1e-05
7741	-0.000121
7742	-5.7e-05
7743	-4.8e-05
7744	8e-05
7745	0.000143
7746	0.000303
7747	-4.2e-05
7748	-0.000583
7749	-0.000337
7750	-0.000301
7751	-0.000326
7752	4e-05
7753	0.000229
7754	0.000194
7755	-0.000331
7756	-0.000505
7757	-0.000453
7758	-0.000224
7759	-4.2e-05
7760	-9.4e-05
7761	-0.00011
7762	-0.000278
7763	-0.000552
7764	-0.000298
7765	0.000461
7766	0.000405
7767	-0.00015
7768	-0.000422
7769	-3.7e-05
7770	-0.000175
7771	-0.000506
7772	-0.000465
7773	-0.000388
7774	-0.00018
7775	0.000148
7776	-0.00016
7777	-0.000228
7778	-0.000429
7779	-0.000296
7780	-0.000146
7781	-5.1e-05
7782	-6.6e-05
7783	-0.000346
7784	-0.000435
7785	-0.000378
7786	-0.000307
7787	-6e-05
7788	1.9e-05
7789	-4.6e-05
7790	5.7e-05
7791	-0.000195
7792	-4.5e-05
7793	-1.3e-05
7794	0.000297
7795	0.000184
7796	0.000415
7797	0.000234
7798	-0.00011
7799	-0.000103
7800	-0.000341
7801	-0.000231
7802	-1.8e-05
7803	0.000156
7804	-1.2e-05
7805	-0.00039
7806	4.1e-05
7807	0.000358
7808	0.000355
7809	0.000332
7810	4e-06
7811	4.6e-05
7812	-0.000166
7813	-0.000363
7814	-0.000604
7815	-0.000263
7816	-0.000157
7817	-5.6e-05
7818	0.000163
7819	7.4e-05
7820	-0.000231
7821	-0.000525
7822	-0.000692
7823	-0.000104
7824	-0.000118
7825	-0.000255
7826	-7.7e-05
7827	0.000161
7828	-0.000209
7829	-0.000435
7830	-0.000568
7831	-0.000293
7832	-0.000144
7833	0.000317
7834	0.000354
7835	0.000169
7836	-0.00016
7837	0.000181
7838	0.000392
7839	0.000345
7840	0.000151
7841	-0.000191
7842	-0.000132
7843	-9.9e-05
7844	5.1e-05
7845	-7.3e-05
7846	-0.000286
7847	-0.000259
7848	-0.000114
7849	-0.000159
7850	-0.000301
7851	-0.00011
7852	3.4e-05
7853	-1.2e-05
7854	-2.2e-05
7855	-0.000283
7856	-0.000483
7857	-0.000516
7858	-7e-05
7859	0.000325
7860	-1.7e-05
7861	-0.000229
7862	-0.000128
7863	0.000143
7864	8.6e-05
7865	-9.1e-05
7866	-0.00047
7867	2.7e-05
7868	0.000537
7869	0.000522
7870	0.000316
7871	0.000146
7872	0.000144
7873	2e-06
7874	-9.1e-05
7875	-0.000291
7876	7.9e-05
7877	0.000541
7878	0.000236
7879	-7.7e-05
7880	-5.9e-05
7881	-6.6e-05
7882	0.000113
7883	0.000409
7884	0.000501
7885	6.8e-05
7886	-0.000103
7887	-0.000163
7888	-0.000329
7889	-0.000436
7890	-0.000415
7891	-0.000134
7892	0.000213
7893	0.000241
7894	-1.8e-05
7895	-8.5e-05
7896	0.000141
7897	0.00037
7898	-2.9e-05
7899	-0.000401
7900	-0.000398
7901	-9.9e-05
7902	0.000274
7903	6.9e-05
7904	-0.000162
7905	-0.000172
7906	0.000281
7907	0.000636
7908	0.000472
7909	0.00013
7910	-5.3e-05
7911	9.5e-05
7912	-6.6e-05
7913	-0.000109
7914	-0.000179
7915	-0.000146
7916	-0.000167
7917	0.00011
7918	0.000574
7919	0.000176
7920	0.000116
7921	0.000361
7922	0.000672
7923	0.000214
7924	-0.000144
7925	-0.000332
7926	-0.000163
7927	-4.8e-05
7928	0.000291
7929	0.00042
7930	0.000454
7931	0.000371
7932	0.000332
7933	0.000439
7934	9.8e-05
7935	-0.000152
7936	-0.000375
7937	-0.00011
7938	-0.00046
7939	-0.000561
7940	-0.000397
7941	-4.4e-05
7942	-8.6e-05
7943	-2.6e-05
7944	-0.000115
7945	-7.9e-05
7946	-0.00019
7947	-6.8e-05
7948	-0.000126
7949	-0.000312
7950	-0.000448
7951	-0.000482
7952	0.000112
7953	0.000385
7954	-6e-05
7955	-0.00037
7956	-0.000307
7957	-0.000209
7958	0.000195
7959	1e-05
7960	-0.000149
7961	-0.00023
7962	-0.000234
7963	-0.000198
7964	-0.00053
7965	-0.000455
7966	0.00031
7967	0.000747
7968	0.000153
7969	-0.00033
7970	-9.5e-05
7971	0.00033
7972	0.000243
7973	-4.6e-05
7974	-0.000432
7975	-0.000442
7976	-0.000175
7977	-4.8e-05
7978	0.000109
7979	0.000178
7980	0.000504
7981	0.000385
7982	-0.00023
7983	-0.000436
7984	-0.000422
7985	-0.000363
7986	0.000163
7987	0.000248
7988	0.000109
7989	-6.9e-05
7990	-0.000379
7991	-0.000349
7992	-0.000255
7993	-0.000493
7994	-0.000595
7995	-0.000529
7996	-0.000137
7997	0.000347
7998	0.000117
[truncated: 3,401 more rows]

## Sheet: C394M
Time	UV
6000	-0.002722
6001	-0.002726
6002	-0.002461
6003	-0.002359
6004	-0.002698
6005	-0.002754
6006	-0.002868
6007	-0.002949
6008	-0.002904
6009	-0.002782
6010	-0.00256
6011	-0.002451
6012	-0.002747
6013	-0.002766
6014	-0.002459
6015	-0.002378
6016	-0.002212
6017	-0.002424
6018	-0.002632
6019	-0.002762
6020	-0.002424
6021	-0.002393
6022	-0.002273
6023	-0.002312
6024	-0.002483
6025	-0.002488
6026	-0.002642
6027	-0.003004
6028	-0.003141
6029	-0.00284
6030	-0.002411
6031	-0.002154
6032	-0.002306
6033	-0.002581
6034	-0.002607
6035	-0.002582
6036	-0.002511
6037	-0.002617
6038	-0.0026
6039	-0.002824
6040	-0.003008
6041	-0.003078
6042	-0.00303
6043	-0.002821
6044	-0.0029
6045	-0.002988
6046	-0.003008
6047	-0.002475
6048	-0.002
6049	-0.002536
6050	-0.002741
6051	-0.002307
6052	-0.002142
6053	-0.002375
6054	-0.002349
6055	-0.00263
6056	-0.002966
6057	-0.002986
6058	-0.002919
6059	-0.003114
6060	-0.003021
6061	-0.003138
6062	-0.003153
6063	-0.002845
6064	-0.002553
6065	-0.002379
6066	-0.002528
6067	-0.002549
6068	-0.002598
6069	-0.002803
6070	-0.002736
6071	-0.0023
6072	-0.002319
6073	-0.002642
6074	-0.002476
6075	-0.002446
6076	-0.002264
6077	-0.002286
6078	-0.002305
6079	-0.002799
6080	-0.003052
6081	-0.002714
6082	-0.002342
6083	-0.002271
6084	-0.002873
6085	-0.00295
6086	-0.002758
6087	-0.002878
6088	-0.002942
6089	-0.00283
6090	-0.002781
6091	-0.002591
6092	-0.002727
6093	-0.002965
6094	-0.002807
6095	-0.002487
6096	-0.002542
6097	-0.002676
6098	-0.002448
6099	-0.002096
6100	-0.002266
6101	-0.00252
6102	-0.00287
6103	-0.002788
6104	-0.002725
6105	-0.002735
6106	-0.003073
6107	-0.002933
6108	-0.002981
6109	-0.002809
6110	-0.00285
6111	-0.002883
6112	-0.002986
6113	-0.003198
6114	-0.003521
6115	-0.003347
6116	-0.002852
6117	-0.002711
6118	-0.003079
6119	-0.003022
6120	-0.002801
6121	-0.002833
6122	-0.002586
6123	-0.002416
6124	-0.002468
6125	-0.002273
6126	-0.002173
6127	-0.002428
6128	-0.00269
6129	-0.002639
6130	-0.002515
6131	-0.00257
6132	-0.002451
6133	-0.002654
6134	-0.002684
6135	-0.002547
6136	-0.00291
6137	-0.003316
6138	-0.003232
6139	-0.002558
6140	-0.002508
6141	-0.002687
6142	-0.002389
6143	-0.002555
6144	-0.00267
6145	-0.002855
6146	-0.002609
6147	-0.002188
6148	-0.002524
6149	-0.002853
6150	-0.00288
6151	-0.0028
6152	-0.002553
6153	-0.002362
6154	-0.002579
6155	-0.002601
6156	-0.002723
6157	-0.002917
6158	-0.003282
6159	-0.002992
6160	-0.002705
6161	-0.002505
6162	-0.002505
6163	-0.002849
6164	-0.002861
6165	-0.002606
6166	-0.00245
6167	-0.002346
6168	-0.002325
6169	-0.00268
6170	-0.003048
6171	-0.003228
6172	-0.003223
6173	-0.002996
6174	-0.002386
6175	-0.002613
6176	-0.002911
6177	-0.002808
6178	-0.002931
6179	-0.00335
6180	-0.003488
6181	-0.003486
6182	-0.00315
6183	-0.002752
6184	-0.002573
6185	-0.002507
6186	-0.002399
6187	-0.002349
6188	-0.002692
6189	-0.002916
6190	-0.002955
6191	-0.003201
6192	-0.002826
6193	-0.002631
6194	-0.002425
6195	-0.002589
6196	-0.002636
6197	-0.002578
6198	-0.002629
6199	-0.002929
6200	-0.003049
6201	-0.003144
6202	-0.003185
6203	-0.002829
6204	-0.00214
6205	-0.002156
6206	-0.002681
6207	-0.002895
6208	-0.002809
6209	-0.002459
6210	-0.002606
6211	-0.002587
6212	-0.002707
6213	-0.002868
6214	-0.002827
6215	-0.00286
6216	-0.002763
6217	-0.002833
6218	-0.002733
6219	-0.002425
6220	-0.002229
6221	-0.002318
6222	-0.002657
6223	-0.002756
6224	-0.002606
6225	-0.002591
6226	-0.002702
6227	-0.002492
6228	-0.002123
6229	-0.002456
6230	-0.002051
6231	-0.001929
6232	-0.001835
6233	-0.002344
6234	-0.002577
6235	-0.002997
6236	-0.003027
6237	-0.002696
6238	-0.00234
6239	-0.001849
6240	-0.002166
6241	-0.002592
6242	-0.002836
6243	-0.002931
6244	-0.002915
6245	-0.002855
6246	-0.002502
6247	-0.002229
6248	-0.002421
6249	-0.002423
6250	-0.002773
6251	-0.002209
6252	-0.002318
6253	-0.002878
6254	-0.003205
6255	-0.002527
6256	-0.002502
6257	-0.002713
6258	-0.00296
6259	-0.002846
6260	-0.002428
6261	-0.002477
6262	-0.002532
6263	-0.002704
6264	-0.003019
6265	-0.003418
6266	-0.003149
6267	-0.003064
6268	-0.002993
6269	-0.003128
6270	-0.002572
6271	-0.002083
6272	-0.001752
6273	-0.001872
6274	-0.002294
6275	-0.002626
6276	-0.002658
6277	-0.002898
6278	-0.001989
6279	-0.001617
6280	-0.001631
6281	-0.002402
6282	-0.002426
6283	-0.002579
6284	-0.002762
6285	-0.00293
6286	-0.002656
6287	-0.002523
6288	-0.002659
6289	-0.002499
6290	-0.002527
6291	-0.002267
6292	-0.002291
6293	-0.002122
6294	-0.002328
6295	-0.002625
6296	-0.002877
6297	-0.002903
6298	-0.002984
6299	-0.003267
6300	-0.003166
6301	-0.002752
6302	-0.002741
6303	-0.002833
6304	-0.002581
6305	-0.002531
6306	-0.002557
6307	-0.002666
6308	-0.002782
6309	-0.002942
6310	-0.00281
6311	-0.002748
6312	-0.00267
6313	-0.002714
6314	-0.002565
6315	-0.002445
6316	-0.002127
6317	-0.002238
6318	-0.002564
6319	-0.00319
6320	-0.00363
6321	-0.003665
6322	-0.003177
6323	-0.002968
6324	-0.002616
6325	-0.002535
6326	-0.002708
6327	-0.002775
6328	-0.002823
6329	-0.002882
6330	-0.002936
6331	-0.002855
6332	-0.003036
6333	-0.002584
6334	-0.00252
6335	-0.002847
6336	-0.002921
6337	-0.002776
6338	-0.002629
6339	-0.002829
6340	-0.003276
6341	-0.003088
6342	-0.003
6343	-0.002767
6344	-0.002922
6345	-0.003097
6346	-0.003198
6347	-0.00301
6348	-0.002484
6349	-0.002422
6350	-0.002784
6351	-0.002805
6352	-0.002502
6353	-0.002391
6354	-0.002497
6355	-0.002779
6356	-0.002673
6357	-0.002234
6358	-0.002701
6359	-0.002994
6360	-0.002771
6361	-0.00288
6362	-0.003021
6363	-0.00307
6364	-0.003275
6365	-0.003365
6366	-0.003122
6367	-0.002758
6368	-0.002908
6369	-0.003039
6370	-0.003107
6371	-0.003011
6372	-0.002829
6373	-0.002413
6374	-0.002615
6375	-0.002859
6376	-0.002581
6377	-0.002484
6378	-0.002753
6379	-0.002743
6380	-0.002853
6381	-0.002808
6382	-0.002866
6383	-0.00255
6384	-0.002899
6385	-0.002963
6386	-0.002725
6387	-0.002791
6388	-0.002873
6389	0
6390	0
6391	-0.000178
6392	-0.000776
6393	-0.001616
6394	-0.001913
6395	-0.001839
6396	-0.001843
6397	-0.002037
6398	-0.002226
6399	-0.001999
6400	-0.001482
6401	-0.001476
6402	-0.001892
6403	-0.001968
6404	-0.001713
6405	-0.001573
6406	-0.001823
6407	-0.001871
6408	-0.001775
6409	-0.001781
6410	-0.00174
6411	-0.001733
6412	-0.001938
6413	-0.001881
6414	-0.001786
6415	-0.002001
6416	-0.001814
6417	-0.001782
6418	-0.001876
6419	-0.001981
6420	-0.001954
6421	-0.001747
6422	-0.001914
6423	-0.001622
6424	-0.00143
6425	-0.001683
6426	-0.001824
6427	-0.001733
6428	-0.001679
6429	-0.001895
6430	-0.002126
6431	-0.002124
6432	-0.001801
6433	-0.001849
6434	-0.002251
6435	-0.002189
6436	-0.002241
6437	-0.002076
6438	-0.002124
6439	-0.001587
6440	-0.001215
6441	-0.001416
6442	-0.00095
6443	-0.001183
6444	-0.001635
6445	-0.002137
6446	-0.002311
6447	-0.002397
6448	-0.002391
6449	-0.00228
6450	-0.002347
6451	-0.002141
6452	-0.002137
6453	-0.002123
6454	-0.001955
6455	-0.001695
6456	-0.001626
6457	-0.002092
6458	-0.002415
6459	-0.001947
6460	-0.001906
6461	-0.001936
6462	-0.002396
6463	-0.002081
6464	-0.001965
6465	-0.001997
6466	-0.001903
6467	-0.00167
6468	-0.001527
6469	-0.001618
6470	-0.001723
6471	-0.001803
6472	-0.001745
6473	-0.001818
6474	-0.001723
6475	-0.001788
6476	-0.001984
6477	-0.001974
6478	-0.002391
6479	-0.00254
6480	-0.002477
6481	-0.002362
6482	-0.002364
6483	-0.002506
6484	-0.002418
6485	-0.002198
6486	-0.002234
6487	-0.002051
6488	-0.001849
6489	-0.002134
6490	-0.002372
6491	-0.002496
6492	-0.002321
6493	-0.002127
6494	-0.00196
6495	-0.001841
6496	-0.002171
6497	-0.002456
6498	-0.002512
6499	-0.002259
6500	-0.002175
6501	-0.002166
6502	-0.00198
6503	-0.001604
6504	-0.001889
6505	-0.002453
6506	-0.002325
6507	-0.002104
6508	-0.002015
6509	-0.002038
6510	-0.002158
6511	-0.002206
6512	-0.002406
6513	-0.002011
6514	-0.001765
6515	-0.001763
6516	-0.002578
6517	-0.00253
6518	-0.002369
6519	-0.002415
6520	-0.001734
6521	-0.001627
6522	-0.002155
6523	-0.002544
6524	-0.00273
6525	-0.002396
6526	-0.002133
6527	-0.001967
6528	-0.00225
6529	-0.002007
6530	-0.00199
6531	-0.002009
6532	-0.002042
6533	-0.002187
6534	-0.002542
6535	-0.002533
6536	-0.002433
6537	-0.002146
6538	-0.001755
6539	-0.002042
6540	-0.002388
6541	-0.00249
6542	-0.002559
6543	-0.002495
6544	-0.002172
6545	-0.001916
6546	-0.001772
6547	-0.002051
6548	-0.001984
6549	-0.002201
6550	-0.002396
6551	-0.002425
6552	-0.00249
6553	-0.002684
6554	-0.00278
6555	-0.002757
6556	-0.00253
6557	-0.002296
6558	-0.002535
6559	-0.002854
6560	-0.002601
6561	-0.00254
6562	-0.002884
6563	-0.002812
6564	-0.002661
6565	-0.002176
6566	-0.002206
6567	-0.002454
6568	-0.002597
6569	-0.002911
6570	-0.003023
6571	-0.002903
6572	-0.002294
6573	-0.002178
6574	-0.002013
6575	-0.002087
6576	-0.002749
6577	-0.002842
6578	-0.002802
6579	-0.002628
6580	-0.002393
6581	-0.00273
6582	-0.003149
6583	-0.002748
6584	-0.002625
6585	-0.002745
6586	-0.002841
6587	-0.002591
6588	-0.002541
6589	-0.002234
6590	-0.002379
6591	-0.002563
6592	-0.002219
6593	-0.002152
6594	-0.002353
6595	-0.002168
6596	-0.002313
6597	-0.002724
6598	-0.002592
6599	-0.002831
6600	-0.003032
6601	-0.002891
6602	-0.00281
6603	-0.002614
6604	-0.002703
6605	-0.002489
6606	-0.00261
6607	-0.002715
6608	-0.002661
6609	-0.002471
6610	-0.002721
6611	-0.002876
6612	-0.002808
6613	-0.002519
6614	-0.002607
6615	-0.002736
6616	-0.002616
6617	-0.002863
6618	-0.003289
6619	-0.003055
6620	-0.002473
6621	-0.001874
6622	-0.002103
6623	-0.002689
6624	-0.002854
6625	-0.002645
6626	-0.002279
6627	-0.002153
6628	-0.002533
6629	-0.002918
6630	-0.002739
6631	-0.002489
6632	-0.00259
6633	-0.002776
6634	-0.002782
6635	-0.002643
6636	-0.002587
6637	-0.002965
6638	-0.003057
6639	-0.003038
6640	-0.002991
6641	-0.002911
6642	-0.002542
6643	-0.002454
6644	-0.002382
6645	-0.002682
6646	-0.002082
6647	-0.00197
6648	-0.002013
6649	-0.002406
6650	-0.002461
6651	-0.002452
6652	-0.002103
6653	-0.001939
6654	-0.002191
6655	-0.002379
6656	-0.002061
6657	-0.00202
6658	-0.002121
6659	-0.002371
6660	-0.002633
6661	-0.002895
6662	-0.002637
6663	-0.002319
6664	-0.002499
6665	-0.002788
6666	-0.002745
6667	-0.002771
6668	-0.002549
6669	-0.002444
6670	-0.002258
6671	-0.0024
6672	-0.002166
6673	-0.001993
6674	-0.002214
6675	-0.00266
6676	-0.002361
6677	-0.002058
6678	-0.001764
6679	-0.001853
6680	-0.002189
6681	-0.002404
6682	-0.002532
6683	-0.002199
6684	-0.001979
6685	-0.002369
6686	-0.002734
6687	-0.00286
6688	-0.002252
6689	-0.002068
6690	-0.001902
6691	-0.001873
6692	-0.002083
6693	-0.002281
6694	-0.002357
6695	-0.002172
6696	-0.001944
6697	-0.001844
6698	-0.001881
6699	-0.001751
6700	-0.00176
6701	-0.001706
6702	-0.001866
6703	-0.001854
6704	-0.001845
6705	-0.001872
6706	-0.002061
6707	-0.002354
6708	-0.002273
6709	-0.002266
6710	-0.002172
6711	-0.00222
6712	-0.002012
6713	-0.002121
6714	-0.002299
6715	-0.001945
6716	-0.001622
6717	-0.001346
6718	-0.001526
6719	-0.001458
6720	-0.001411
6721	-0.001099
6722	-0.001376
6723	-0.001691
6724	-0.001913
6725	-0.001798
6726	-0.001689
6727	-0.001799
6728	-0.001886
6729	-0.001697
6730	-0.001271
6731	-0.001322
6732	-0.001686
6733	-0.001646
6734	-0.001281
6735	-0.001086
6736	-0.001395
6737	-0.001425
6738	-0.001359
6739	-0.001462
6740	-0.001494
6741	-0.001564
6742	-0.00157
6743	-0.001435
6744	-0.00148
6745	-0.001386
6746	-0.001149
6747	-0.001234
6748	-0.001756
6749	-0.001861
6750	-0.001875
6751	-0.001815
6752	-0.001556
6753	-0.001499
6754	-0.00123
6755	-0.00153
6756	-0.001651
6757	-0.001614
6758	-0.001497
6759	-0.001426
6760	-0.001484
6761	-0.001615
6762	-0.001952
6763	-0.00212
6764	-0.002051
6765	-0.001985
6766	-0.001714
6767	-0.001206
6768	-0.001402
6769	-0.001696
6770	-0.001323
6771	-0.001019
6772	-0.000998
6773	-0.001417
6774	-0.001237
6775	-0.001061
6776	-0.001604
6777	-0.001724
6778	-0.001666
6779	-0.00167
6780	-0.001448
6781	-0.001109
6782	-0.001185
6783	-0.001335
6784	-0.001535
6785	-0.001316
6786	-0.001402
6787	-0.001144
6788	-0.001473
6789	-0.001488
6790	-0.001156
6791	-0.000804
6792	-0.001226
6793	-0.001153
6794	-0.00095
6795	-0.000978
6796	-0.001043
6797	-0.00132
6798	-0.001361
6799	-0.001025
6800	-0.001043
6801	-0.001247
6802	-0.001419
6803	-0.001374
6804	-0.001593
6805	-0.001042
6806	-0.00112
6807	-0.001534
6808	-0.001629
6809	-0.001426
6810	-0.001406
6811	-0.001227
6812	-0.001271
6813	-0.001204
6814	-0.000953
6815	-0.001237
6816	-0.001691
6817	-0.001942
6818	-0.001289
6819	-0.000945
6820	-0.000907
6821	-0.001429
6822	-0.001378
6823	-0.001291
6824	-0.001384
6825	-0.00149
6826	-0.001561
6827	-0.001082
6828	-0.000695
6829	-0.000756
6830	-0.000863
6831	-0.001265
6832	-0.001212
6833	-0.000977
6834	-0.000967
6835	-0.001251
6836	-0.001471
6837	-0.00133
6838	-0.001051
6839	-0.001206
6840	-0.001599
6841	-0.001791
6842	-0.001269
6843	-0.001169
6844	-0.001327
6845	-0.001142
6846	-0.000768
6847	-0.000773
6848	-0.00092
6849	-0.000875
6850	-0.001404
6851	-0.001368
6852	-0.001287
6853	-0.001276
6854	-0.001143
6855	-0.000818
6856	-0.000743
6857	-0.000944
6858	-0.001435
6859	-0.001143
6860	-0.000749
6861	-0.001021
6862	-0.001681
6863	-0.001688
6864	-0.001534
6865	-0.001275
6866	-0.001313
6867	-0.000701
6868	-0.000496
6869	-0.000888
6870	-0.001014
6871	-0.001003
6872	-0.001103
6873	-0.001175
6874	-0.000896
6875	-0.000853
6876	-0.001077
6877	-0.000748
6878	-0.000796
6879	-0.001349
6880	-0.00122
6881	-0.000974
6882	-0.001199
6883	-0.001334
6884	-0.001089
6885	-0.00096
6886	-0.000651
6887	-0.000367
6888	-0.000586
6889	-0.000996
6890	-0.001158
6891	-0.000625
6892	-1e-05
6893	-0.000343
6894	-0.000468
6895	-0.000817
6896	-0.000973
6897	-0.000704
6898	-0.000832
6899	-0.001136
6900	-0.001453
6901	-0.001372
6902	-0.001213
6903	-0.001501
6904	-0.001353
6905	-0.001424
6906	-0.000912
6907	-0.000664
6908	-0.000529
6909	-0.000724
6910	-0.000495
6911	-0.000594
6912	-0.000873
6913	-0.001315
6914	-0.000934
6915	-0.00097
6916	-0.000801
6917	-0.000816
6918	-0.000846
6919	-0.001189
6920	-0.001039
6921	-0.001008
6922	-0.000964
6923	-0.000978
6924	-0.000939
6925	-0.001324
6926	-0.001066
6927	-0.000891
6928	-0.000928
6929	-0.001076
6930	-0.001359
6931	-0.001197
6932	-0.001245
6933	-0.001246
6934	-0.00113
6935	-0.000689
6936	-0.000548
6937	-0.000326
6938	-0.000414
6939	-0.00106
6940	-0.00146
6941	-0.001203
6942	-0.001388
6943	-0.001364
6944	-0.000958
6945	-0.00076
6946	-0.000731
6947	-0.000896
6948	-0.001117
6949	-0.001441
6950	-0.00092
6951	-0.00081
6952	-0.00113
6953	-0.000843
6954	-0.000674
6955	-0.000951
6956	-0.00113
6957	-0.001085
6958	-0.001263
6959	-0.001034
6960	-0.001137
6961	-0.00135
6962	-0.001506
6963	-0.001456
6964	-0.00121
6965	-0.001075
6966	-0.000936
6967	-0.000863
6968	-0.00121
6969	-0.001035
6970	-0.000875
6971	-0.000829
6972	-0.000878
6973	-0.001367
6974	-0.001278
6975	-0.001033
6976	-0.000327
6977	-0.000308
6978	-0.000626
6979	-0.001348
6980	-0.00122
6981	-0.001454
6982	-0.001537
6983	-0.001762
6984	-0.001802
6985	-0.001384
6986	-0.001113
6987	-0.001106
6988	-0.001207
6989	-0.001109
6990	-0.000968
6991	-0.000769
6992	-0.001081
6993	-0.001104
6994	-0.001173
6995	-0.000864
6996	-0.000677
6997	-0.000539
6998	-0.000702
6999	-0.000629
7000	-0.000688
7001	-0.000928
7002	-0.001216
7003	-0.00127
7004	-0.001502
7005	-0.001342
7006	-0.001217
7007	-0.001213
7008	-0.001524
7009	-0.001065
7010	-0.000672
7011	-0.000819
7012	-0.000973
7013	-0.000915
7014	-0.000933
7015	-0.001095
7016	-0.000814
7017	-0.000884
7018	-0.001167
7019	-0.001401
7020	-0.001278
7021	-0.001412
7022	-0.001193
7023	-0.00088
7024	-0.000895
7025	-0.0014
7026	-0.001293
7027	-0.001292
7028	-0.001477
7029	-0.001744
7030	-0.001389
7031	-0.001355
7032	-0.001258
7033	-0.001076
7034	-0.000792
7035	-0.000948
7036	-0.001312
7037	-0.001399
7038	-0.001121
7039	-0.001004
7040	-0.001233
7041	-0.001402
7042	-0.001292
7043	-0.001318
7044	-0.001124
7045	-0.00117
7046	-0.001235
7047	-0.001158
7048	-0.000976
7049	-0.001082
7050	-0.001313
7051	-0.000965
7052	-0.000835
7053	-0.000751
7054	-0.000792
7055	-0.001195
7056	-0.00126
7057	-0.00124
7058	-0.001185
7059	-0.0014
7060	-0.001447
7061	-0.001195
7062	-0.001041
7063	-0.000949
7064	-0.001127
7065	-0.00081
7066	-0.000862
7067	-0.001123
7068	-0.001301
7069	-0.001007
7070	-0.000964
7071	-0.000739
7072	-0.00033
7073	-0.000367
7074	-0.000687
7075	-0.00068
7076	-0.000815
7077	-0.000677
7078	-0.000993
7079	-0.001595
7080	-0.001463
7081	-0.001188
7082	-0.001043
7083	-0.001185
7084	-0.001086
7085	-0.000686
7086	-0.000412
7087	-0.000512
7088	-0.000224
7089	-0.000589
7090	-0.000614
7091	-0.001083
7092	-0.001142
7093	-0.001522
7094	-0.001563
7095	-0.000999
7096	-0.000667
7097	-0.000525
7098	-0.000728
7099	-0.00125
7100	-0.001146
7101	-0.001277
7102	-0.001304
7103	-0.00122
7104	-0.000968
7105	-0.000706
7106	-0.000994
7107	-0.001353
7108	-0.001292
7109	-0.001481
7110	-0.001432
7111	-0.001505
7112	-0.00146
7113	-0.001471
7114	-0.001235
7115	-0.001073
7116	-0.000764
7117	-0.00073
7118	-0.001137
7119	-0.001289
7120	-0.001308
7121	-0.00114
7122	-0.001242
7123	-0.000852
7124	-0.000574
7125	-0.000941
7126	-0.00094
7127	-0.000988
7128	-0.001116
7129	-0.001276
7130	-0.001254
7131	-0.001292
7132	-0.001517
7133	-0.00172
7134	-0.00187
7135	-0.001693
7136	-0.001536
7137	-0.001609
7138	-0.001188
7139	-0.001086
7140	-0.001143
7141	-0.001183
7142	-0.001153
7143	-0.001626
7144	-0.001422
7145	-0.00154
7146	-0.001244
7147	-0.000779
7148	-0.000707
7149	-0.000498
7150	-0.000837
7151	-0.001004
7152	-0.001215
7153	-0.001381
7154	-0.001641
7155	-0.001564
7156	-0.001788
7157	-0.001553
7158	-0.001318
7159	-0.00153
7160	-0.001263
7161	-0.001112
7162	-0.001052
7163	-0.000839
7164	-0.00064
7165	-0.001254
7166	-0.001757
7167	-0.001615
7168	-0.001524
7169	-0.001073
7170	-0.001059
7171	-0.000952
7172	-0.001215
7173	-0.001355
7174	-0.001341
7175	-0.001027
7176	-0.000882
7177	-0.001512
7178	-0.001744
7179	-0.001409
7180	-0.000879
7181	-0.00079
7182	-0.001364
7183	-0.001376
7184	-0.000924
7185	-0.001152
7186	-0.001085
7187	-0.001092
7188	-0.001092
7189	-0.001633
7190	-0.001729
7191	-0.001109
7192	-0.001074
7193	-0.000882
7194	-0.00078
7195	-0.001
7196	-0.00104
7197	-0.001082
7198	-0.00102
7199	-0.001346
7200	-0.001333
7201	-0.000898
7202	-0.000903
7203	-0.001218
7204	-0.001384
7205	-0.001376
7206	-0.001471
7207	-0.001579
7208	-0.001538
7209	-0.001533
7210	-0.001221
7211	-0.001134
7212	-0.001135
7213	-0.000885
7214	-0.000996
7215	-0.001175
7216	-0.001104
7217	-0.00106
7218	-0.001162
7219	-0.001221
7220	-0.001349
7221	-0.001504
7222	-0.001429
7223	-0.001124
7224	-0.001012
7225	-0.001091
7226	-0.001491
7227	-0.00176
7228	-0.001537
7229	-0.00146
7230	-0.001117
7231	-0.000887
7232	-0.000652
7233	-0.000414
7234	-0.000298
7235	-0.000633
7236	-0.001056
7237	-0.001596
7238	-0.001599
7239	-0.001661
7240	-0.001304
7241	-0.001214
7242	-0.001125
7243	-0.001308
7244	-0.001325
7245	-0.001319
7246	-0.001104
7247	-0.001212
7248	-0.001272
7249	-0.001162
7250	-0.001238
7251	-0.001504
7252	-0.001896
7253	-0.001723
7254	-0.001482
7255	-0.001331
7256	-0.00123
7257	-0.000956
7258	-0.001157
7259	-0.000811
7260	-0.000469
7261	-0.000405
7262	-0.001078
7263	-0.001335
7264	-0.001306
7265	-0.001441
7266	-0.001429
7267	-0.001335
7268	-0.001263
7269	-0.001038
7270	-0.000926
7271	-0.001109
7272	-0.001131
7273	-0.001002
7274	-0.001148
7275	-0.001173
7276	-0.001239
7277	-0.001311
7278	-0.001188
7279	-0.001176
7280	-0.001441
7281	-0.001353
7282	-0.001303
7283	-0.001246
7284	-0.001365
7285	-0.001619
7286	-0.001581
7287	-0.001255
7288	-0.001106
7289	-0.001224
7290	-0.001569
7291	-0.001446
7292	-0.000815
7293	-0.0007
7294	-0.001567
7295	-0.001734
7296	-0.001535
7297	-0.001019
7298	-0.000667
7299	-0.000627
7300	-0.001042
7301	-0.001693
7302	-0.0015
7303	-0.00134
7304	-0.000951
7305	-0.000982
7306	-0.001249
7307	-0.001397
7308	-0.001291
7309	-0.000977
7310	-0.001036
7311	-0.001038
7312	-0.001323
7313	-0.00109
7314	-0.001218
7315	-0.001494
7316	-0.001704
7317	-0.001526
7318	-0.001583
7319	-0.00164
7320	-0.001051
7321	-0.000889
7322	-0.001171
7323	-0.001502
7324	-0.001049
7325	-0.000743
7326	-0.001006
7327	-0.001383
7328	-0.001407
7329	-0.001307
7330	-0.001264
7331	-0.000653
7332	-0.000729
7333	-0.000936
7334	-0.001209
7335	-0.000994
7336	-0.001016
7337	-0.001112
7338	-0.001318
7339	-0.001151
7340	-0.001322
7341	-0.001262
7342	-0.001121
7343	-0.001045
7344	-0.001198
7345	-0.000995
7346	-0.001013
7347	-0.001214
7348	-0.001423
7349	-0.001519
7350	-0.001768
7351	-0.00134
7352	-0.000998
7353	-0.000948
7354	-0.001317
7355	-0.001123
7356	-0.001054
7357	-0.001241
7358	-0.00163
7359	-0.001794
7360	-0.001657
7361	-0.001804
7362	-0.001439
7363	-0.001263
7364	-0.001241
7365	-0.001345
7366	-0.000998
7367	-0.001189
7368	-0.001563
7369	-0.001482
7370	-0.001334
7371	-0.001354
7372	-0.001294
7373	-0.001281
7374	-0.001083
7375	-0.00122
7376	-0.001266
7377	-0.001068
7378	-0.001272
7379	-0.001484
7380	-0.001535
7381	-0.001135
7382	-0.001024
7383	-0.000902
7384	-0.000842
7385	-0.000843
7386	-0.001201
7387	-0.001369
7388	-0.00111
7389	-0.001392
7390	-0.001365
7391	-0.001014
7392	-0.00126
7393	-0.001508
7394	-0.001716
7395	-0.001808
7396	-0.001672
7397	-0.001538
7398	-0.001407
7399	-0.001628
7400	-0.001731
7401	-0.00144
7402	-0.000954
7403	-0.001247
7404	-0.00157
7405	-0.001532
7406	-0.001282
7407	-0.001489
7408	-0.001609
7409	-0.00147
7410	-0.001528
7411	-0.001708
7412	-0.001463
7413	-0.001471
7414	-0.001642
7415	-0.001274
7416	-0.001277
7417	-0.001221
7418	-0.001465
7419	-0.001607
7420	-0.001497
7421	-0.001709
7422	-0.001774
7423	-0.001708
7424	-0.00118
7425	-0.000907
7426	-0.001035
7427	-0.000982
7428	-0.001295
7429	-0.001681
7430	-0.001638
7431	-0.001608
7432	-0.00137
7433	-0.001373
7434	-0.001571
7435	-0.001644
7436	-0.001485
7437	-0.001378
7438	-0.001322
7439	-0.000817
7440	-0.000809
7441	-0.000987
7442	-0.001385
7443	-0.001083
7444	-0.001225
7445	-0.001112
7446	-0.00121
7447	-0.001155
7448	-0.001635
7449	-0.001814
7450	-0.001345
7451	-0.001195
7452	-0.001414
7453	-0.001445
7454	-0.001759
7455	-0.001873
7456	-0.001321
7457	-0.000977
7458	-0.000814
7459	-0.001416
7460	-0.001535
7461	-0.001564
7462	-0.001451
7463	-0.001303
7464	-0.001449
7465	-0.0014
7466	-0.001485
7467	-0.001834
7468	-0.001879
7469	-0.001677
7470	-0.001789
7471	-0.001407
7472	-0.001091
7473	-0.001177
7474	-0.001591
7475	-0.001549
7476	-0.001215
7477	-0.001216
7478	-0.001418
7479	-0.001263
7480	-0.001375
7481	-0.001537
7482	-0.00169
7483	-0.001762
7484	-0.002001
7485	-0.001924
7486	-0.001347
7487	-0.001186
7488	-0.001517
7489	-0.001558
7490	-0.001452
7491	-0.001018
7492	-0.000828
7493	-0.001098
7494	-0.001559
7495	-0.001951
7496	-0.001999
7497	-0.00208
7498	-0.001783
7499	-0.001449
7500	-0.001303
7501	-0.001256
7502	-0.001056
7503	-0.000946
7504	-0.001048
7505	-0.00131
7506	-0.001813
7507	-0.002044
7508	-0.001805
7509	-0.00146
7510	-0.001404
7511	-0.001176
7512	-0.001216
7513	-0.001289
7514	-0.001215
7515	-0.001311
7516	-0.001518
7517	-0.001592
7518	-0.001681
7519	-0.00166
7520	-0.00164
7521	-0.001488
7522	-0.001508
7523	-0.00133
7524	-0.001258
7525	-0.000856
7526	-0.000848
7527	-0.001253
7528	-0.001343
7529	-0.001449
7530	-0.001892
7531	-0.00184
7532	-0.001379
7533	-0.001031
7534	-0.001066
7535	-0.001256
7536	-0.001184
7537	-0.001148
7538	-0.001508
7539	-0.001879
7540	-0.00192
7541	-0.001947
7542	-0.001425
7543	-0.001394
7544	-0.001709
7545	-0.001521
7546	-0.001457
7547	-0.001653
7548	-0.001544
7549	-0.001121
7550	-0.001026
7551	-0.001435
7552	-0.001301
7553	-0.001054
7554	-0.000684
7555	-0.000819
7556	-0.001199
7557	-0.001049
7558	-0.001338
7559	-0.001908
7560	-0.001729
7561	-0.001188
7562	-0.001492
7563	-0.001489
7564	-0.001576
7565	-0.00152
7566	-0.001148
7567	-0.001266
7568	-0.001611
7569	-0.001762
7570	-0.001434
7571	-0.001545
7572	-0.001327
7573	-0.001688
7574	-0.001909
7575	-0.001777
7576	-0.00123
7577	-0.001158
7578	-0.001385
7579	-0.001609
7580	-0.001652
7581	-0.001561
7582	-0.001231
7583	-0.001565
7584	-0.001245
7585	-0.001179
7586	-0.000933
7587	-0.001067
7588	-0.001597
7589	-0.00158
7590	-0.001112
7591	-0.001156
7592	-0.001281
7593	-0.001205
7594	-0.001367
7595	-0.001359
7596	-0.001167
7597	-0.001195
7598	-0.001144
7599	-0.001206
7600	-0.001576
7601	-0.001893
7602	-0.001669
7603	-0.001436
7604	-0.00143
7605	-0.00134
7606	-0.001298
7607	-0.001504
7608	-0.001297
7609	-0.001274
7610	-0.001346
7611	-0.001495
7612	-0.001328
7613	-0.00145
7614	-0.001611
7615	-0.001479
7616	-0.001551
7617	-0.001345
7618	-0.00107
7619	-0.000827
7620	-0.001083
7621	-0.001263
7622	-0.001054
7623	-0.000962
7624	-0.00152
7625	-0.001793
7626	-0.001595
7627	-0.001087
7628	-0.000953
7629	-0.000936
7630	-0.001193
7631	-0.001307
7632	-0.001485
7633	-0.001746
7634	-0.00138
7635	-0.00117
7636	-0.001156
7637	-0.001295
7638	-0.001627
7639	-0.001716
7640	-0.001389
7641	-0.001413
7642	-0.001673
7643	-0.001308
7644	-0.001114
7645	-0.001252
7646	-0.001482
7647	-0.001483
7648	-0.001148
7649	-0.001121
7650	-0.001194
7651	-0.001122
7652	-0.001058
7653	-0.001229
7654	-0.001429
7655	-0.001473
7656	-0.001326
7657	-0.001149
7658	-0.000882
7659	-0.000992
7660	-0.001242
7661	-0.00062
7662	-0.000571
7663	-0.000782
7664	-0.001398
7665	-0.00094
7666	-0.001278
7667	-0.001749
7668	-0.001684
7669	-0.001343
7670	-0.001741
7671	-0.002212
7672	-0.00176
7673	-0.001278
7674	-0.00113
7675	-0.001195
7676	-0.001233
7677	-0.001202
7678	-0.001592
7679	-0.001632
7680	-0.001645
7681	-0.001877
7682	-0.0015
7683	-0.001302
7684	-0.001394
7685	-0.001389
7686	-0.00132
7687	-0.001326
7688	-0.001398
7689	-0.001614
7690	-0.001523
7691	-0.00153
7692	-0.001551
7693	-0.001463
7694	-0.001678
7695	-0.001764
7696	-0.001515
7697	-0.001413
7698	-0.001705
7699	-0.002017
7700	-0.001754
7701	-0.001605
7702	-0.001669
7703	-0.001696
7704	-0.000852
7705	-0.000556
7706	-0.000884
7707	-0.001712
7708	-0.001866
7709	-0.001849
7710	-0.001579
7711	-0.001647
7712	-0.001586
7713	-0.00154
7714	-0.001591
7715	-0.001804
7716	-0.001251
7717	-0.001136
7718	-0.001291
7719	-0.001671
7720	-0.001578
7721	-0.001279
7722	-0.000984
7723	-0.000754
7724	-0.001146
7725	-0.001212
7726	-0.001219
7727	-0.001271
7728	-0.001601
7729	-0.001413
7730	-0.001505
7731	-0.00166
7732	-0.001153
7733	-0.001125
7734	-0.000983
7735	-0.001149
7736	-0.001395
7737	-0.001441
7738	-0.0014
7739	-0.001406
7740	-0.001719
7741	-0.0019
7742	-0.001654
7743	-0.001799
7744	-0.002159
7745	-0.001888
7746	-0.001407
7747	-0.001734
7748	-0.001738
7749	-0.001403
7750	-0.001301
7751	-0.001498
7752	-0.001018
7753	-0.001445
7754	-0.00169
7755	-0.001559
7756	-0.00123
7757	-0.001418
7758	-0.0017
7759	-0.001603
7760	-0.001411
7761	-0.001594
7762	-0.001469
7763	-0.001516
7764	-0.00149
7765	-0.001675
7766	-0.001727
7767	-0.0015
7768	-0.001641
7769	-0.001675
7770	-0.001752
7771	-0.001653
7772	-0.001513
7773	-0.001475
7774	-0.00118
7775	-0.001408
7776	-0.001734
7777	-0.001912
7778	-0.001539
7779	-0.00098
7780	-0.000977
7781	-0.001325
7782	-0.00178
7783	-0.001651
7784	-0.001507
7785	-0.001567
7786	-0.001734
7787	-0.00194
7788	-0.001776
7789	-0.001189
7790	-0.001481
7791	-0.001577
7792	-0.001728
7793	-0.001249
7794	-0.001163
7795	-0.001843
7796	-0.001683
7797	-0.001274
7798	-0.001066
7799	-0.001179
7800	-0.001496
7801	-0.00157
7802	-0.001509
7803	-0.001753
7804	-0.00191
7805	-0.001889
7806	-0.001572
7807	-0.001433
7808	-0.001212
7809	-0.00159
7810	-0.001727
7811	-0.001467
7812	-0.001667
7813	-0.001431
7814	-0.001397
7815	-0.001499
7816	-0.001728
7817	-0.001571
7818	-0.001719
7819	-0.001909
7820	-0.00174
7821	-0.001294
7822	-0.001145
7823	-0.0012
7824	-0.001597
7825	-0.001857
7826	-0.002058
7827	-0.0021
7828	-0.001797
7829	-0.001696
7830	-0.001787
7831	-0.001572
7832	-0.001161
7833	-0.001319
7834	-0.001245
7835	-0.001655
7836	-0.001714
7837	-0.001825
7838	-0.001776
7839	-0.001846
7840	-0.002162
7841	-0.00197
7842	-0.001758
7843	-0.001308
7844	-0.001317
7845	-0.002084
7846	-0.002319
7847	-0.002249
7848	-0.001846
7849	-0.001283
7850	-0.000814
7851	-0.000753
7852	-0.001324
7853	-0.001515
7854	-0.001341
7855	-0.001134
7856	-0.001303
7857	-0.001502
7858	-0.001604
7859	-0.001743
7860	-0.002104
7861	-0.00181
7862	-0.001797
7863	-0.001689
7864	-0.001676
7865	-0.001459
7866	-0.001524
7867	-0.001302
7868	-0.001099
7869	-0.001407
7870	-0.001643
7871	-0.001709
7872	-0.001737
7873	-0.001595
7874	-0.001365
7875	-0.001304
7876	-0.001439
7877	-0.001632
7878	-0.001553
7879	-0.001329
7880	-0.001173
7881	-0.001258
7882	-0.00174
7883	-0.001762
7884	-0.001815
7885	-0.001879
7886	-0.001634
7887	-0.001357
7888	-0.001372
7889	-0.001602
7890	-0.001567
7891	-0.001674
7892	-0.001657
7893	-0.001581
7894	-0.00146
7895	-0.001296
7896	-0.001455
7897	-0.00156
7898	-0.001403
7899	-0.001594
7900	-0.001705
7901	-0.001641
7902	-0.001714
7903	-0.001922
7904	-0.001939
7905	-0.00118
7906	-0.001274
7907	-0.001705
7908	-0.001619
7909	-0.001382
7910	-0.001237
7911	-0.001597
7912	-0.001803
7913	-0.001824
7914	-0.002056
7915	-0.001808
7916	-0.001269
7917	-0.001065
7918	-0.001264
7919	-0.001289
7920	-0.00121
7921	-0.001324
7922	-0.001541
7923	-0.001939
7924	-0.002183
7925	-0.001859
7926	-0.001904
7927	-0.001671
7928	-0.00171
7929	-0.001769
7930	-0.001639
7931	-0.001642
7932	-0.001626
7933	-0.001703
7934	-0.00194
7935	-0.002088
7936	-0.001835
7937	-0.001281
7938	-0.00152
7939	-0.001186
7940	-0.00138
7941	-0.001325
7942	-0.001335
7943	-0.001639
7944	-0.001568
7945	-0.001328
7946	-0.001283
7947	-0.001414
7948	-0.001386
7949	-0.001435
7950	-0.001689
7951	-0.001756
7952	-0.001419
7953	-0.001354
7954	-0.00122
7955	-0.001225
7956	-0.001671
7957	-0.001876
7958	-0.001681
7959	-0.001692
7960	-0.001401
7961	-0.001417
7962	-0.00138
7963	-0.001391
7964	-0.001573
7965	-0.001906
7966	-0.001751
7967	-0.001432
7968	-0.001116
7969	-0.001407
7970	-0.00123
7971	-0.001452
7972	-0.001574
7973	-0.001882
7974	-0.00179
7975	-0.00172
7976	-0.001885
7977	-0.001659
7978	-0.001695
7979	-0.001853
7980	-0.001852
7981	-0.002072
7982	-0.002051
7983	-0.001577
7984	-0.001468
7985	-0.001564
7986	-0.001926
7987	-0.001817
7988	-0.001514
7989	-0.001383
7990	-0.001229
7991	-0.001096
7992	-0.001539
7993	-0.001145
7994	-0.001055
7995	-0.001564
7996	-0.001346
7997	-0.001571
7998	-0.001658
[truncated: 3,401 more rows]

## Sheet: C394S
Time	UV
2400	0.000895
2401	0.000736
2402	0.001079
2403	0.00141
2404	0.0011
2405	0.000895
2406	0.001017
2407	0.001252
2408	0.001039
2409	0.001134
2410	0.001177
2411	0.00106
2412	0.000768
2413	0.000707
2414	0.000612
2415	0.000646
2416	0.000894
2417	0.000892
2418	0.001021
2419	0.001123
2420	0.00129
2421	0.00122
2422	0.001293
2423	0.001198
2424	0.001323
2425	0.001332
2426	0.001248
2427	0.001172
2428	0.000873
2429	0.000918
2430	0.000966
2431	0.000858
2432	0.000899
2433	0.001086
2434	0.001269
2435	0.001265
2436	0.001133
2437	0.001038
2438	0.000984
2439	0.001008
2440	0.001009
2441	0.001006
2442	0.001125
2443	0.001144
2444	0.001158
2445	0.001087
2446	0.001157
2447	0.00105
2448	0.000782
2449	0.000845
2450	0.000785
2451	0.000801
2452	0.001284
2453	0.00134
2454	0.000924
2455	0.000842
2456	0.000766
2457	0.00092
2458	0.000897
2459	0.001033
2460	0.00102
2461	0.000792
2462	0.000882
2463	0.001055
2464	0.00104
2465	0.000873
2466	0.001193
2467	0.001091
2468	0.000865
2469	0.000894
2470	0.001208
2471	0.001273
2472	0.001222
2473	0.001166
2474	0.001098
2475	0.000957
2476	0.000889
2477	0.00086
2478	0.000928
2479	0.000763
2480	0.000907
2481	0.001305
2482	0.001092
2483	0.001019
2484	0.000886
2485	0.000979
2486	0.000888
2487	0.00086
2488	0.00097
2489	0.000945
2490	0.000923
2491	0.001063
2492	0.000871
2493	0.000737
2494	0.000906
2495	0.00102
2496	0.000979
2497	0.00131
2498	0.001335
2499	0.001349
2500	0.001143
2501	0.001048
2502	0.00103
2503	0.00111
2504	0.001018
2505	0.000805
2506	0.000691
2507	0.000395
2508	0.000919
2509	0.001022
2510	0.000807
2511	0.000983
2512	0.000878
2513	0.000889
2514	0.000952
2515	0.000979
2516	0.000707
2517	0.000691
2518	0.000897
2519	0.000988
2520	0.000769
2521	0.001033
2522	0.001042
2523	0.000978
2524	0.000881
2525	0.000687
2526	0.000539
2527	0.00073
2528	0.000946
2529	0.001117
2530	0.001098
2531	0.000668
2532	0.000669
2533	0.000593
2534	0.000664
2535	0.000783
2536	0.000844
2537	0.000968
2538	0.000928
2539	0.00082
2540	0.00108
2541	0.001158
2542	0.001172
2543	0.001133
2544	0.000948
2545	0.000791
2546	0.000984
2547	0.001046
2548	0.000915
2549	0.00066
2550	0.000829
2551	0.001278
2552	0.001391
2553	0.001102
2554	0.000656
2555	0.000702
2556	0.000976
2557	0.001031
2558	0.000998
2559	0.00122
2560	0.001112
2561	0.001118
2562	0.001191
2563	0.00106
2564	0.001075
2565	0.000823
2566	0.000715
2567	0.000819
2568	0.000943
2569	0.000875
2570	0.000787
2571	0.000791
2572	0.00097
2573	0.000893
2574	0.000614
2575	0.000868
2576	0.00102
2577	0.001121
2578	0.000974
2579	0.000705
2580	0.000787
2581	0.001189
2582	0.00139
2583	0.001254
2584	0.000919
2585	0.000715
2586	0.00108
2587	0.001352
2588	0.001027
2589	0.001015
2590	0.001244
2591	0.001338
2592	0.001054
2593	0.000723
2594	0.000844
2595	0.001179
2596	0.001498
2597	0.001162
2598	0.001144
2599	0.001137
2600	0.001182
2601	0.00119
2602	0.000796
2603	0.0008
2604	0.001041
2605	0.001152
2606	0.000977
2607	0.000838
2608	0.000844
2609	0.000838
2610	0.00103
2611	0.001073
2612	0.000957
2613	0.00088
2614	0.000963
2615	0.001022
2616	0.001
2617	0.000748
2618	0.000508
2619	0.000778
2620	0.000725
2621	0.00057
2622	0.000664
2623	0.001012
2624	0.000958
2625	0.000842
2626	0.000449
2627	0.000445
2628	0.000839
2629	0.001045
2630	0.00107
2631	0.000938
2632	0.000867
2633	0.00097
2634	0.001027
2635	0.001064
2636	0.000998
2637	0.000719
2638	0.000831
2639	0.000957
2640	0.00094
2641	0.000899
2642	0.000866
2643	0.000802
2644	0.000674
2645	0.000586
2646	0.000448
2647	0.000607
2648	0.00112
2649	0.001242
2650	0.001014
2651	0.000946
2652	0.00108
2653	0.001161
2654	0.001087
2655	0.000975
2656	0.000821
2657	0.000947
2658	0.001041
2659	0.001072
2660	0.000843
2661	0.001058
2662	0.001017
2663	0.001087
2664	0.001054
2665	0.000998
2666	0.000965
2667	0.000818
2668	0.000778
2669	0.000836
2670	0.001002
2671	0.000854
2672	0.000801
2673	0.000815
2674	0.000926
2675	0.000826
2676	0.000575
2677	0.000491
2678	0.000616
2679	0.000595
2680	0.000629
2681	0.000689
2682	0.001027
2683	0.001104
2684	0.0011
2685	0.000978
2686	0.000724
2687	0.000593
2688	0.000463
2689	0.000737
2690	0.001192
2691	0.001379
2692	0.00122
2693	0.001016
2694	0.001129
2695	0.000978
2696	0.001211
2697	0.001107
2698	0.000962
2699	0.00081
2700	0.000918
2701	0.001196
2702	0.001158
2703	0.000837
2704	0.00061
2705	0.000477
2706	0.000637
2707	0.000788
2708	0.000785
2709	0.000869
2710	0.001106
2711	0.001072
2712	0.000727
2713	0.000911
2714	0.000824
2715	0.000692
2716	0.000503
2717	0.000896
2718	0.001182
2719	0.000933
2720	0.000679
2721	0.000562
2722	0.000302
2723	0.000536
2724	0.000434
2725	0.0006
2726	0.000946
2727	0.000892
2728	0.000811
2729	0.000845
2730	0.000998
2731	0.000967
2732	0.000924
2733	0.000815
2734	0.001029
2735	0.001113
2736	0.001125
2737	0.000838
2738	0.000849
2739	0.000931
2740	0.000974
2741	0.001117
2742	0.001016
2743	0.000846
2744	0.000758
2745	0.000622
2746	0.000867
2747	0.000999
2748	0.001021
2749	0.000948
2750	0.00089
2751	0.001164
2752	0.000951
2753	0.000909
2754	0.001039
2755	0.000929
2756	0.000905
2757	0.000938
2758	0.000855
2759	0.000614
2760	0.000765
2761	0.000985
2762	0.000814
2763	0.000531
2764	0.000513
2765	0.001081
2766	0.001242
2767	0.001162
2768	0.001288
2769	0.001328
2770	0.001005
2771	0.001137
2772	0.00111
2773	0.001188
2774	0.001103
2775	0.001061
2776	0.000936
2777	0.000689
2778	0.000718
2779	0.000926
2780	0.001045
2781	0.000799
2782	0.000522
2783	0.000565
2784	0.000715
2785	0.000923
2786	0.001081
2787	0.001069
2788	0.001082
2789	0.001046
2790	0.000841
2791	0.000827
2792	0.00097
2793	0.00097
2794	0.000962
2795	0.000837
2796	0.000764
2797	0.000909
2798	0.001163
2799	0.001047
2800	0.000916
2801	0.000997
2802	0.001052
2803	0.000831
2804	0.000451
2805	0.000585
2806	0.000922
2807	0.001072
2808	0.000942
2809	0.000743
2810	0.000773
2811	0.000845
2812	0.000973
2813	0.001097
2814	0.001049
2815	0.001043
2816	0.000971
2817	0.000905
2818	0.001086
2819	0.001156
2820	0.000929
2821	0.001094
2822	0.001219
2823	0.001145
2824	0.000981
2825	0.000822
2826	0.000918
2827	0.001141
2828	0.001184
2829	0.001021
2830	0.000707
2831	0.000803
2832	0.000836
2833	0.000785
2834	0.000944
2835	0.000892
2836	0.001167
2837	0.00136
2838	0.001384
2839	0.001184
2840	0.001067
2841	0.00119
2842	0.001081
2843	0.001003
2844	0.001022
2845	0.001074
2846	0.000807
2847	0.000946
2848	0.001052
2849	0.000826
2850	0.000754
2851	0.0008
2852	0.000959
2853	0.001075
2854	0.000982
2855	0.000845
2856	0.001007
2857	0.001096
2858	0.000977
2859	0.00107
2860	0.001325
2861	0.001174
2862	0.001061
2863	0.001117
2864	0.001277
2865	0.00098
2866	0.000986
2867	0.001045
2868	0.001232
2869	0.001138
2870	0.000929
2871	0.000729
2872	0.000925
2873	0.00098
2874	0.000992
2875	0.001001
2876	0.000744
2877	0.000582
2878	0.000776
2879	0.00088
2880	0.000958
2881	0.000954
2882	0.00132
2883	0.001318
2884	0.001282
2885	0.001307
2886	0.001229
2887	0.000942
2888	0.001077
2889	0.00095
2890	0.000995
2891	0.001109
2892	0.000815
2893	0.000606
2894	0.00059
2895	0.000692
2896	0.000705
2897	0.000779
2898	0.000865
2899	0.0008
2900	0.00075
2901	0.000855
2902	0.000765
2903	0.000807
2904	0.000968
2905	0.00114
2906	0.001234
2907	0.001045
2908	0.000677
2909	0.000736
2910	0.001206
2911	0.0015
2912	0.001312
2913	0.001165
2914	0.000946
2915	0.000782
2916	0.000719
2917	0.000914
2918	0.00102
2919	0.001022
2920	0.000995
2921	0.000876
2922	0.00081
2923	0.000948
2924	0.001237
2925	0.001117
2926	0.001047
2927	0.000801
2928	0.000802
2929	0.001117
2930	0.001226
2931	0.000939
2932	0.001069
2933	0.001331
2934	0.001143
2935	0.001112
2936	0.000719
2937	0.000804
2938	0.001126
2939	0.001183
2940	0.00113
2941	0.001053
2942	0.000861
2943	0.000789
2944	0.00077
2945	0.001094
2946	0.001031
2947	0.001089
2948	0.001254
2949	0.001417
2950	0.001163
2951	0.001075
2952	0.00137
2953	0.001453
2954	0.001027
2955	0.000906
2956	0.001208
2957	0.00121
2958	0.001175
2959	0.000953
2960	0.000979
2961	0.000968
2962	0.001119
2963	0.000789
2964	0.001006
2965	0.001062
2966	0.001065
2967	0.001086
2968	0.000931
2969	0.001149
2970	0.001281
2971	0.001276
2972	0.001139
2973	0.000956
2974	0.001024
2975	0.001014
2976	0.00083
2977	0.000994
2978	0.001018
2979	0.000957
2980	0.000962
2981	0.000765
2982	0.000715
2983	0.00104
2984	0.001294
2985	0.001441
2986	0.001431
2987	0.001361
2988	0.001234
2989	0.001201
2990	0.001256
2991	0.001309
2992	0.001055
2993	0.001081
2994	0.001327
2995	0.001034
2996	0.001102
2997	0.001206
2998	0.001251
2999	0.001154
3000	0.001203
3001	0.001079
3002	0.001208
3003	0.00126
3004	0.001266
3005	0.001118
3006	0.000827
3007	0.001041
3008	0.001276
3009	0.001316
3010	0.001214
3011	0.001338
3012	0.001392
3013	0.001191
3014	0.000979
3015	0.001104
3016	0.001215
3017	0.001102
3018	0.000861
3019	0.000856
3020	0.000968
3021	0.000942
3022	0.000839
3023	0.00089
3024	0.001285
3025	0.001237
3026	0.000928
3027	0.000934
3028	0.001065
3029	0.000947
3030	0.000881
3031	0.001134
3032	0.001123
3033	0.000999
3034	0.000847
3035	0.000931
3036	0.000948
3037	0.001054
3038	0.00097
3039	0.000911
3040	0.00111
3041	0.001227
3042	0.001312
3043	0.001206
3044	0.00108
3045	0.000919
3046	0.001158
3047	0.001435
3048	0.001236
3049	0.000702
3050	0.000525
3051	0.000728
3052	0.000906
3053	0.000896
3054	0.000673
3055	0.000644
3056	0.000627
3057	0.000702
3058	0.001004
3059	0.000981
3060	0.000942
3061	0.000915
3062	0.000956
3063	0.000903
3064	0.001121
3065	0.001251
3066	0.001276
3067	0.001009
3068	0.000933
3069	0.001075
3070	0.000837
3071	0.000829
3072	0.000957
3073	0.001022
3074	0.000836
3075	0.00068
3076	0.001147
3077	0.001598
3078	0.001285
3079	0.000947
3080	0.000981
3081	0.001155
3082	0.001002
3083	0.001115
3084	0.001057
3085	0.001122
3086	0.001248
3087	0.001028
3088	0.000901
3089	0.000839
3090	0.00077
3091	0.000829
3092	0.000797
3093	0.000781
3094	0.00101
3095	0.000925
3096	0.000961
3097	0.000976
3098	0.001129
3099	0.001079
3100	0.001028
3101	0.001126
3102	0.001352
3103	0.000946
3104	0.000824
3105	0.000639
3106	0.000808
3107	0.000656
3108	0.000853
3109	0.001071
3110	0.001204
3111	0.001138
3112	0.000934
3113	0.000814
3114	0.000584
3115	0.00071
3116	0.000796
3117	0.000765
3118	0.000839
3119	0.001013
3120	0.001104
3121	0.001087
3122	0.001234
3123	0.001026
3124	0.000497
3125	0.000388
3126	0.000792
3127	0.001169
3128	0.001367
3129	0.001317
3130	0.001349
3131	0.001194
3132	0.001092
3133	0.001168
3134	0.001222
3135	0.00109
3136	0.001097
3137	0.001267
3138	0.001328
3139	0.001106
3140	0.001032
3141	0.00115
3142	0.000999
3143	0.000998
3144	0.001307
3145	0.00114
3146	0.001128
3147	0.00116
3148	0.001238
3149	0.001097
3150	0.00084
3151	0.001217
3152	0.001181
3153	0.000993
3154	0.000847
3155	0.001074
3156	0.001361
3157	0.001362
3158	0.001101
3159	0.001034
3160	0.000963
3161	0.000875
3162	0.00063
3163	0.000685
3164	0.000876
3165	0.000909
3166	0.000918
3167	0.0007
3168	0.000593
3169	0.000704
3170	0.001027
3171	0.001175
3172	0.001007
3173	0.001136
3174	0.001283
3175	0.001185
3176	0.000973
3177	0.000743
3178	0.000883
3179	0.000948
3180	0.000995
3181	0.00122
3182	0.001387
3183	0.001058
3184	0.000618
3185	0.000828
3186	0.001276
3187	0.001335
3188	0.001176
3189	0.000731
3190	0.00074
3191	0.000936
3192	0.001116
3193	0.001302
3194	0.001729
3195	0.001602
3196	0.001035
3197	0.00054
3198	0.000755
3199	0.000891
3200	0.001025
3201	0.001182
3202	0.001226
3203	0.001313
3204	0.00133
3205	0.001472
3206	0.001365
3207	0.001114
3208	0.001042
3209	0.001083
3210	0.000965
3211	0.000978
3212	0.000811
3213	0.000656
3214	0.000591
3215	0.000852
3216	0.001229
3217	0.001272
3218	0.001251
3219	0.001179
3220	0.001249
3221	0.001241
3222	0.001121
3223	0.001083
3224	0.001135
3225	0.001205
3226	0.001312
3227	0.001198
3228	0.001139
3229	0.001075
3230	0.001044
3231	0.001145
3232	0.001076
3233	0.001264
3234	0.001194
3235	0.001167
3236	0.001188
3237	0.001192
3238	0.001019
3239	0.00114
3240	0.001332
3241	0.001314
3242	0.001004
3243	0.000736
3244	0.000811
3245	0.00095
3246	0.001045
3247	0.000908
3248	0.000953
3249	0.000976
3250	0.001017
3251	0.001206
3252	0.001092
3253	0.000945
3254	0.001056
3255	0.000937
3256	0.000641
3257	0.000792
3258	0.001007
3259	0.000852
3260	0.000628
3261	0.000982
3262	0.001268
3263	0.0011
3264	0.000826
3265	0.000861
3266	0.000963
3267	0.000936
3268	0.000898
3269	0.001092
3270	0.001261
3271	0.001237
3272	0.001154
3273	0.000984
3274	0.000817
3275	0.000878
3276	0.000999
3277	0.001256
3278	0.001411
3279	0.001253
3280	0.001239
3281	0.001517
3282	0.001356
3283	0.00114
3284	0.000861
3285	0.000665
3286	0.000717
3287	0.000846
3288	0.000904
3289	0.000958
3290	0.000851
3291	0.000909
3292	0.00092
3293	0.001266
3294	0.001161
3295	0.001094
3296	0.001067
3297	0.00106
3298	0.001104
3299	0.001008
3300	0.001045
3301	0.001005
3302	0.001046
3303	0.000954
3304	0.000944
3305	0.0009
3306	0.001089
3307	0.000996
3308	0.001061
3309	0.001456
3310	0.001496
3311	0.001388
3312	0.001125
3313	0.000914
3314	0.001137
3315	0.001143
3316	0.000763
3317	0.000545
3318	0.000873
3319	0.000957
3320	0.000938
3321	0.00116
3322	0.00115
3323	0.000881
3324	0.000979
3325	0.00147
3326	0.001422
3327	0.001028
3328	0.000787
3329	0.00083
3330	0.000815
3331	0.000814
3332	0.00091
3333	0.000836
3334	0.000846
3335	0.00107
3336	0.001398
3337	0.001341
3338	0.001222
3339	0.001275
3340	0.001474
3341	0.001303
3342	0.001093
3343	0.001277
3344	0.00101
3345	0.000534
3346	0.000513
3347	0.000842
3348	0.001101
3349	0.000876
3350	0.000648
3351	0.000495
3352	0.00076
3353	0.001046
3354	0.001365
3355	0.001286
3356	0.001295
3357	0.00137
3358	0.001258
3359	0.001281
3360	0.001318
3361	0.00106
3362	0.000837
3363	0.000976
3364	0.001093
3365	0.001042
3366	0.00144
3367	0.001641
3368	0.001241
3369	0.000812
3370	0.000906
3371	0.00099
3372	0.001207
3373	0.00122
3374	0.001084
3375	0.000868
3376	0.00072
3377	0.000877
3378	0.001124
3379	0.001434
3380	0.001415
3381	0.001162
3382	0.000935
3383	0.001011
3384	0.001208
3385	0.001053
3386	0.000954
3387	0.000912
3388	0.000925
3389	0.001062
3390	0.000962
3391	0.000816
3392	0.000937
3393	0.000916
3394	0.001148
3395	0.001283
3396	0.001359
3397	0.001337
3398	0.001247
3399	0.00141
3400	0.001359
3401	0.001104
3402	0.000982
3403	0.00105
3404	0.001086
3405	0.001016
3406	0.001057
3407	0.001183
3408	0.001203
3409	0.001388
3410	0.001494
3411	0.001227
3412	0.001023
3413	0.000872
3414	0.000867
3415	0.000998
3416	0.000898
3417	0.000868
3418	0.000859
3419	0.001168
3420	0.001188
3421	0.001195
3422	0.001184
3423	0.001043
3424	0.001217
3425	0.001556
3426	0.001127
3427	0.000635
3428	0.000938
3429	0.001211
3430	0.00103
3431	0.000857
3432	0.001016
3433	0.001206
3434	0.001389
3435	0.001328
3436	0.001027
3437	0.001158
3438	0.001021
3439	0.000899
3440	0.001211
3441	0.001444
3442	0.001181
3443	0.000699
3444	0.000684
3445	0.001008
3446	0.001218
3447	0.001022
3448	0.001063
3449	0.001164
3450	0.000972
3451	0.00123
3452	0.00143
3453	0.00166
3454	0.001514
3455	0.001145
3456	0.000958
3457	0.001109
3458	0.001124
3459	0.001152
3460	0.001191
3461	0.000999
3462	0.001117
3463	0.001272
3464	0.001096
3465	0.001138
3466	0.001123
3467	0.00107
3468	0.000961
3469	0.000817
3470	0.00076
3471	0.000692
3472	0.000938
3473	0.001132
3474	0.001354
3475	0.00124
3476	0.000994
3477	0.00103
3478	0.001105
3479	0.001026
3480	0.001062
3481	0.001405
3482	0.001255
3483	0.001237
3484	0.000944
3485	0.000817
3486	0.000894
3487	0.001353
3488	0.001408
3489	0.001311
3490	0.001025
3491	0.000974
3492	0.001134
3493	0.001078
3494	0.001115
3495	0.001333
3496	0.001303
3497	0.001452
3498	0.001468
3499	0.001477
3500	0.001074
3501	0.00112
3502	0.001235
3503	0.001093
3504	0.000734
3505	0.000704
3506	0.00088
3507	0.001216
3508	0.001202
3509	0.001363
3510	0.001228
3511	0.001425
3512	0.001511
3513	0.001293
3514	0.000731
3515	0.000807
3516	0.00102
3517	0.001186
3518	0.001032
3519	0.00098
3520	0.000944
3521	0.000861
3522	0.000733
3523	0.0006
3524	0.000623
3525	0.000948
3526	0.001297
3527	0.001246
3528	0.001075
3529	0.001072
3530	0.000986
3531	0.000915
3532	0.000927
3533	0.000919
3534	0.00075
3535	0.001113
3536	0.001359
3537	0.001149
3538	0.001271
3539	0.001287
3540	0.001041
3541	0.00105
3542	0.000917
3543	0.000971
3544	0.001036
3545	0.000863
3546	0.001056
3547	0.000904
3548	0.000908
3549	0.001122
3550	0.001115
3551	0.000562
3552	0.000722
3553	0.001003
3554	0.001278
3555	0.001359
3556	0.001476
3557	0.001613
3558	0.001345
3559	0.001145
3560	0.000968
3561	0.000842
3562	0.001219
3563	0.001308
3564	0.001333
3565	0.001116
3566	0.001074
3567	0.000876
3568	0.001015
3569	0.000961
3570	0.001027
3571	0.000995
3572	0.000984
3573	0.000875
3574	0.000832
3575	0.00082
3576	0.001166
3577	0.001441
3578	0.001431
3579	0.001299
3580	0.001286
3581	0.001313
3582	0.001256
3583	0.001073
3584	0.001006
3585	0.001193
3586	0.001171
3587	0.000971
3588	0.000828
3589	0.000774
3590	0.000789
3591	0.000818
3592	0.000973
3593	0.000988
3594	0.000971
3595	0.000912
3596	0.00096
3597	0.001008
3598	0.00101
3599	0.000842
3600	0.000782
3601	0.000965
3602	0.001112
3603	0.001249
3604	0.001303
3605	0.000964
3606	0.001051
3607	0.001139
3608	0.001404
3609	0.001265
3610	0.001138
3611	0.001075
3612	0.000963
3613	0.001057
3614	0.001102
3615	0.000975
3616	0.000885
3617	0.001078
3618	0.000954
3619	0.000629
3620	0.001227
3621	0.00124
3622	0.000789
3623	0.001037
3624	0.00134
3625	0.001439
3626	0.00106
3627	0.000902
3628	0.000812
3629	0.000873
3630	0.000959
3631	0.001014
3632	0.000745
3633	0.000992
3634	0.001163
3635	0.00122
3636	0.001155
3637	0.001169
3638	0.00136
3639	0.001244
3640	0.000951
3641	0.00105
3642	0.000987
3643	0.000911
3644	0.00104
3645	0.001383
3646	0.001471
3647	0.001085
3648	0.001036
3649	0.000865
3650	0.000911
3651	0.001017
3652	0.001138
3653	0.001102
3654	0.001291
3655	0.001463
3656	0.001284
3657	0.001094
3658	0.000991
3659	0.001021
3660	0.001126
3661	0.001092
3662	0.00131
3663	0.001535
3664	0.0011
3665	0.000779
3666	0.000824
3667	0.000809
3668	0.00077
3669	0.0008
3670	0.000877
3671	0.000945
3672	0.001079
3673	0.001045
3674	0.000816
3675	0.000863
3676	0.000895
3677	0.000988
3678	0.000809
3679	0.00097
3680	0.001219
3681	0.001195
3682	0.001025
3683	0.001193
3684	0.001202
3685	0.00103
3686	0.000941
3687	0.000996
3688	0.000634
3689	0.000568
3690	0.000559
3691	0.000771
3692	0.000888
3693	0.001041
3694	0.001038
3695	0.001065
3696	0.000961
3697	0.001034
3698	0.000915
3699	0.000776
3700	0.000667
3701	0.000889
3702	0.001043
3703	0.001173
3704	0.001345
3705	0.00131
3706	0.001135
3707	0.000971
3708	0.001251
3709	0.001281
3710	0.000935
3711	0.001083
3712	0.001112
3713	0.00106
3714	0.001038
3715	0.000918
3716	0.000646
3717	0.000614
3718	0.000642
3719	0.00093
3720	0.000898
3721	0.001073
3722	0.001114
3723	0.001239
3724	0.001088
3725	0.001166
3726	0.001243
3727	0.001303
3728	0.001359
3729	0.001425
3730	0.000984
3731	0.000492
3732	0.000601
3733	0.000843
3734	0.001133
3735	0.001081
3736	0.001006
3737	0.001043
3738	0.001198
3739	0.001162
3740	0.001087
3741	0.00111
3742	0.001105
3743	0.001045
3744	0.001204
3745	0.001371
3746	0.001393
3747	0.001387
3748	0.001202
3749	0.001151
3750	0.001537
3751	0.00157
3752	0.001192
3753	0.001046
3754	0.000912
3755	0.001285
3756	0.001521
3757	0.001442
3758	0.001201
3759	0.001167
3760	0.001222
3761	0.00093
3762	0.000827
3763	0.000957
3764	0.001217
3765	0.001479
3766	0.001639
3767	0.001586
3768	0.001223
3769	0.001203
3770	0.001237
3771	0.001243
3772	0.001191
3773	0.001073
3774	0.001119
3775	0.000997
3776	0.000769
3777	0.000914
3778	0.001039
3779	0.001336
3780	0.001159
3781	0.001044
3782	0.00103
3783	0.000812
3784	0.000764
3785	0.000922
3786	0.000889
3787	0.00085
3788	0.000975
3789	0.001069
3790	0.001061
3791	0.001196
3792	0.001139
3793	0.001394
3794	0.001226
3795	0.001194
3796	0.001275
3797	0.001261
3798	0.001142
3799	0.00104
3800	0.001167
3801	0.001154
3802	0.001201
3803	0.001561
3804	0.00138
3805	0.001264
3806	0.001199
3807	0.001255
3808	0.001461
3809	0.001903
3810	0.001783
3811	0.001432
3812	0.001219
3813	0.001219
3814	0.00118
3815	0.001263
3816	0.001226
3817	0.00119
3818	0.001061
3819	0.000927
3820	0.000931
3821	0.000958
3822	0.001414
3823	0.00139
3824	0.001372
3825	0.001174
3826	0.001072
3827	0.001016
3828	0.001314
3829	0.001276
3830	0.001542
3831	0.001612
3832	0.001137
3833	0.001176
3834	0.001176
3835	0.001253
3836	0.001439
3837	0.001341
3838	0.001089
3839	0.000969
3840	0.000925
3841	0.001146
3842	0.001062
3843	0.001248
3844	0.001235
3845	0.001257
3846	0.001299
3847	0.00138
3848	0.001294
3849	0.001278
3850	0.001196
3851	0.001026
3852	0.000956
3853	0.001231
3854	0.000879
3855	0.00075
3856	0.000556
3857	0.000841
3858	0.001154
3859	0.001094
3860	0.000944
3861	0.001088
3862	0.001096
3863	0.001389
3864	0.00182
3865	0.001828
3866	0.001063
3867	0.000759
3868	0.000647
3869	0.0008
3870	0.000928
3871	0.001195
3872	0.001292
3873	0.001288
3874	0.001426
3875	0.001339
3876	0.001175
3877	0.001099
3878	0.001065
3879	0.001108
3880	0.001206
3881	0.001286
3882	0.001298
3883	0.001054
3884	0.000873
3885	0.001194
3886	0.001357
3887	0.001366
3888	0.001332
3889	0.001265
3890	0.001059
3891	0.001107
3892	0.001062
3893	0.001188
3894	0.001174
3895	0.00134
3896	0.001314
3897	0.001308
3898	0.001307
3899	0.001141
3900	0.001063
3901	0.001153
3902	0.001272
3903	0.00129
3904	0.00112
3905	0.000921
3906	0.000835
3907	0.000912
3908	0.001035
3909	0.000941
3910	0.000887
3911	0.001052
3912	0.001344
3913	0.001305
3914	0.001102
3915	0.001099
3916	0.001134
3917	0.001133
3918	0.001307
3919	0.00147
3920	0.001183
3921	0.001139
3922	0.001204
3923	0.001165
3924	0.000957
3925	0.000971
3926	0.000946
3927	0.001239
3928	0.001343
3929	0.001357
3930	0.001374
3931	0.001429
3932	0.001771
3933	0.001558
3934	0.001408
3935	0.001487
3936	0.001581
3937	0.001357
3938	0.001076
3939	0.001404
3940	0.001449
3941	0.001388
3942	0.001165
3943	0.001012
3944	0.000986
3945	0.001192
3946	0.001293
3947	0.001359
3948	0.001396
3949	0.001514
3950	0.001347
3951	0.001166
3952	0.001305
3953	0.001435
3954	0.001521
3955	0.00149
3956	0.001221
3957	0.001327
3958	0.001214
3959	0.001393
3960	0.001667
3961	0.001394
3962	0.001259
3963	0.001385
3964	0.001393
3965	0.001218
3966	0.001127
3967	0.001025
3968	0.000919
3969	0.001041
3970	0.000881
3971	0.000994
3972	0.001256
3973	0.001245
3974	0.001145
3975	0.001162
3976	0.00097
3977	0.001047
3978	0.001313
3979	0.001575
3980	0.001402
3981	0.001509
3982	0.001453
3983	0.001449
3984	0.001027
3985	0.000831
3986	0.001073
3987	0.001055
3988	0.001077
3989	0.001467
3990	0.001581
3991	0.001333
3992	0.001022
3993	0.000686
3994	0.000705
3995	0.000794
3996	0.000857
3997	0.000968
3998	0.001251
3999	0.001325
4000	0.001105
4001	0.001115
4002	0.001003
4003	0.000946
4004	0.000929
4005	0.001313
4006	0.001345
4007	0.001165
4008	0.00127
4009	0.001629
4010	0.001413
4011	0.001193
4012	0.001181
4013	0.001114
4014	0.001086
4015	0.001228
4016	0.00118
4017	0.001376
4018	0.001448
4019	0.00141
4020	0.001391
4021	0.001469
4022	0.001476
4023	0.001564
4024	0.001431
4025	0.001248
4026	0.001346
4027	0.001146
4028	0.001166
4029	0.001145
4030	0.001234
4031	0.001314
4032	0.001234
4033	0.001415
4034	0.001512
4035	0.001329
4036	0.001043
4037	0.001244
4038	0.001433
4039	0.001153
4040	0.00093
4041	0.001224
4042	0.001194
4043	0.000786
4044	0.000848
4045	0.001106
4046	0.001392
4047	0.0012
4048	0.001074
4049	0.001125
4050	0.001244
4051	0.001304
4052	0.00108
4053	0.001111
4054	0.00133
4055	0.001421
4056	0.001173
4057	0.001137
4058	0.001034
4059	0.000851
4060	0.000918
4061	0.001233
4062	0.001199
4063	0.001126
4064	0.001038
4065	0.000617
4066	0.000605
4067	0.001001
4068	0.00126
4069	0.001352
4070	0.001523
4071	0.001455
4072	0.001254
4073	0.000912
4074	0.001098
4075	0.001112
4076	0.001042
4077	0.00117
4078	0.001064
4079	0.000962
4080	0.001002
4081	0.001267
4082	0.001453
4083	0.001485
4084	0.001536
4085	0.001214
4086	0.001354
4087	0.001377
4088	0.001358
4089	0.001367
4090	0.001132
4091	0.000778
4092	0.000822
4093	0.000973
4094	0.001055
4095	0.001164
4096	0.001268
4097	0.001327
4098	0.001219
4099	0.001054
4100	0.000714
4101	0.001139
4102	0.001491
4103	0.001499
4104	0.001449
4105	0.001493
4106	0.00128
4107	0.000923
4108	0.000906
4109	0.001104
4110	0.00138
4111	0.001298
4112	0.001175
4113	0.001366
4114	0.001237
4115	0.00096
4116	0.000916
4117	0.001134
4118	0.001154
4119	0.001117
4120	0.001076
4121	0.001307
4122	0.001505
4123	0.00129
4124	0.001232
4125	0.001048
4126	0.000941
4127	0.000957
4128	0.001184
4129	0.001379
4130	0.001487
4131	0.00159
4132	0.001408
4133	0.001215
4134	0.001064
4135	0.000937
4136	0.001145
4137	0.001363
4138	0.001502
4139	0.001412
4140	0.001286
4141	0.001272
4142	0.001185
4143	0.001316
4144	0.001272
4145	0.001456
4146	0.001268
4147	0.001549
4148	0.001695
4149	0.001622
4150	0.001355
4151	0.001133
4152	0.001096
4153	0.000934
4154	0.000971
4155	0.000964
4156	0.001044
4157	0.000989
4158	0.001112
4159	0.001401
4160	0.001283
4161	0.001031
4162	0.001042
4163	0.001238
4164	0.001116
4165	0.001043
4166	0.001099
4167	0.001177
4168	0.001087
4169	0.001336
4170	0.001793
4171	0.001444
4172	0.000795
4173	0.000844
4174	0.001052
4175	0.001033
4176	0.00093
4177	0.001251
4178	0.00137
4179	0.001433
4180	0.001525
4181	0.001329
4182	0.001426
4183	0.001635
4184	0.001624
4185	0.001392
4186	0.001202
4187	0.001663
4188	0.001618
4189	0.001598
4190	0.001569
4191	0.001655
4192	0.001438
4193	0.001187
4194	0.00095
4195	0.001115
4196	0.001227
4197	0.001339
4198	0.001226
4199	0.001238
4200	0.00102
4201	0.001119
4202	0.001319
4203	0.001125
4204	0.000866
4205	0.00114
4206	0.001111
4207	0.001078
4208	0.00103
4209	0.001025
4210	0.000991
4211	0
4212	-0.000205
4213	-0.001213
4214	-0.0022
4215	-0.002589
4216	-0.002757
4217	-0.002782
4218	-0.002858
4219	-0.002554
4220	-0.002378
4221	-0.002225
4222	-0.002293
4223	-0.002386
4224	-0.002837
4225	-0.002721
4226	-0.00254
4227	-0.00259
4228	-0.002768
4229	-0.002517
4230	-0.002613
4231	-0.002649
4232	-0.00268
4233	-0.002368
4234	-0.002325
4235	-0.002345
4236	-0.002449
4237	-0.002579
4238	-0.002651
4239	-0.002503
4240	-0.002188
4241	-0.002302
4242	-0.002783
4243	-0.002674
4244	-0.002664
4245	-0.002755
4246	-0.002523
4247	-0.002507
4248	-0.002475
4249	-0.002232
4250	-0.002017
4251	-0.002206
4252	-0.002462
4253	-0.00257
4254	-0.00221
4255	-0.00219
4256	-0.002414
4257	-0.00297
4258	-0.002928
4259	-0.00291
4260	-0.002835
4261	-0.002291
4262	-0.001885
4263	-0.001868
4264	-0.002495
4265	-0.00283
4266	-0.002883
4267	-0.002964
4268	-0.002737
4269	-0.002698
4270	-0.002879
4271	-0.002737
4272	-0.002847
4273	-0.002674
4274	-0.002417
4275	-0.002452
4276	-0.002797
4277	-0.00242
4278	-0.002266
4279	-0.002413
4280	-0.002574
4281	-0.002731
4282	-0.00276
4283	-0.002557
4284	-0.002489
4285	-0.002412
4286	-0.002175
4287	-0.001964
4288	-0.001872
4289	-0.001979
4290	-0.002446
4291	-0.002906
4292	-0.002732
4293	-0.002555
4294	-0.002514
4295	-0.002369
4296	-0.002549
4297	-0.002735
4298	-0.002486
4299	-0.002282
4300	-0.002385
4301	-0.002517
4302	-0.002373
4303	-0.002427
4304	-0.00243
4305	-0.002552
4306	-0.002439
4307	-0.002062
4308	-0.002076
4309	-0.002412
4310	-0.00282
4311	-0.00264
4312	-0.002343
4313	-0.002673
4314	-0.002613
4315	-0.002411
4316	-0.002156
4317	-0.002233
4318	-0.002414
4319	-0.002295
4320	-0.002456
4321	-0.002333
4322	-0.002285
4323	-0.002464
4324	-0.002653
4325	-0.002696
4326	-0.002662
4327	-0.002534
4328	-0.002435
4329	-0.002727
4330	-0.002578
4331	-0.002452
4332	-0.002613
4333	-0.002586
4334	-0.00248
4335	-0.0025
4336	-0.002569
4337	-0.002786
4338	-0.002677
4339	-0.002705
4340	-0.002671
4341	-0.002718
4342	-0.002566
4343	-0.002474
4344	-0.002578
4345	-0.002779
4346	-0.002604
4347	-0.002639
4348	-0.002757
4349	-0.002777
4350	-0.002807
4351	-0.002627
4352	-0.002552
4353	-0.002526
4354	-0.002791
4355	-0.002692
4356	-0.002421
4357	-0.002282
4358	-0.002505
4359	-0.002789
4360	-0.002739
4361	-0.00273
4362	-0.002734
4363	-0.002752
4364	-0.002816
4365	-0.002775
4366	-0.002433
4367	-0.002172
4368	-0.002178
4369	-0.002626
4370	-0.002799
4371	-0.002734
4372	-0.002538
4373	-0.002611
4374	-0.002625
4375	-0.002871
4376	-0.00248
4377	-0.002312
4378	-0.002478
4379	-0.00248
4380	-0.002557
4381	-0.002853
4382	-0.00271
4383	-0.00247
4384	-0.002537
4385	-0.002484
4386	-0.0024
4387	-0.002311
4388	-0.002505
4389	-0.002452
4390	-0.002217
4391	-0.002219
4392	-0.002386
4393	-0.00243
4394	-0.002463
4395	-0.002464
4396	-0.002629
4397	-0.002545
4398	-0.002552
[truncated: 3,401 more rows]

## Sheet: C394A
Time	UV
2400	0.00175
2401	0.001857
2402	0.00165
2403	0.001442
2404	0.001222
2405	0.001257
2406	0.001124
2407	0.001284
2408	0.001602
2409	0.001664
2410	0.001587
2411	0.001403
2412	0.001184
2413	0.001236
2414	0.001388
2415	0.001175
2416	0.001158
2417	0.001456
2418	0.001385
2419	0.001482
2420	0.001483
2421	0.001488
2422	0.001359
2423	0.000924
2424	0.000781
2425	0.001079
2426	0.001211
2427	0.001051
2428	0.001209
2429	0.001733
2430	0.001833
2431	0.001351
2432	0.001094
2433	0.001174
2434	0.000921
2435	0.000934
2436	0.001236
2437	0.001257
2438	0.001333
2439	0.001522
2440	0.001469
2441	0.001716
2442	0.001812
2443	0.001585
2444	0.001273
2445	0.001008
2446	0.001177
2447	0.001393
2448	0.001421
2449	0.001363
2450	0.001458
2451	0.00157
2452	0.001505
2453	0.001748
2454	0.001747
2455	0.001822
2456	0.001622
2457	0.001601
2458	0.001512
2459	0.001655
2460	0.001462
2461	0.001305
2462	0.001134
2463	0.001257
2464	0.001383
2465	0.001556
2466	0.001586
2467	0.001367
2468	0.00128
2469	0.001385
2470	0.001465
2471	0.001695
2472	0.001935
2473	0.002071
2474	0.001454
2475	0.001361
2476	0.001596
2477	0.001697
2478	0.001488
2479	0.001596
2480	0.001531
2481	0.001432
2482	0.001397
2483	0.001377
2484	0.001582
2485	0.001643
2486	0.001607
2487	0.001889
2488	0.001915
2489	0.001596
2490	0.001147
2491	0.001217
2492	0.001183
2493	0.001053
2494	0.000803
2495	0.001002
2496	0.001328
2497	0.001677
2498	0.001513
2499	0.001302
2500	0.001073
2501	0.001315
2502	0.001325
2503	0.001081
2504	0.000928
2505	0.001051
2506	0.001588
2507	0.001686
2508	0.001388
2509	0.001451
2510	0.001543
2511	0.001682
2512	0.001779
2513	0.00171
2514	0.001604
2515	0.001396
2516	0.001242
2517	0.001107
2518	0.001141
2519	0.000949
2520	0.000994
2521	0.001016
2522	0.001196
2523	0.001525
2524	0.001514
2525	0.001676
2526	0.00118
2527	0.001134
2528	0.001381
2529	0.001282
2530	0.001312
2531	0.001408
2532	0.001707
2533	0.001705
2534	0.001631
2535	0.001229
2536	0.001059
2537	0.001245
2538	0.001407
2539	0.001343
2540	0.001546
2541	0.001669
2542	0.001505
2543	0.001309
2544	0.00118
2545	0.001317
2546	0.001269
2547	0.001067
2548	0.001229
2549	0.001642
2550	0.001882
2551	0.001252
2552	0.001048
2553	0.001111
2554	0.001102
2555	0.001321
2556	0.001475
2557	0.0016
2558	0.001803
2559	0.001904
2560	0.001725
2561	0.001358
2562	0.001121
2563	0.001076
2564	0.001134
2565	0.001463
2566	0.001584
2567	0.00155
2568	0.00143
2569	0.001662
2570	0.001551
2571	0.001457
2572	0.001526
2573	0.001446
2574	0.001347
2575	0.001162
2576	0.001021
2577	0.001176
2578	0.001464
2579	0.001432
2580	0.001492
2581	0.0013
2582	0.001709
2583	0.001502
2584	0.001302
2585	0.001155
2586	0.00129
2587	0.001538
2588	0.001538
2589	0.00135
2590	0.001139
2591	0.001336
2592	0.001668
2593	0.001627
2594	0.001715
2595	0.001578
2596	0.001577
2597	0.001767
2598	0.001805
2599	0.001515
2600	0.001148
2601	0.001379
2602	0.001551
2603	0.00149
2604	0.0015
2605	0.001252
2606	0.001227
2607	0.001149
2608	0.001094
2609	0.001108
2610	0.001107
2611	0.001098
2612	0.001188
2613	0.001451
2614	0.001439
2615	0.00118
2616	0.001091
2617	0.001176
2618	0.001479
2619	0.001435
2620	0.001561
2621	0.001296
2622	0.001043
2623	0.000894
2624	0.001004
2625	0.001287
2626	0.001551
2627	0.001338
2628	0.001385
2629	0.001546
2630	0.001439
2631	0.001192
2632	0.000852
2633	0.00076
2634	0.001015
2635	0.001228
2636	0.001276
2637	0.001321
2638	0.001459
2639	0.001456
2640	0.001326
2641	0.0015
2642	0.001496
2643	0.001449
2644	0.001351
2645	0.001469
2646	0.001324
2647	0.00105
2648	0.001003
2649	0.001081
2650	0.001287
2651	0.001725
2652	0.001822
2653	0.001672
2654	0.001451
2655	0.001405
2656	0.001413
2657	0.001277
2658	0.001306
2659	0.00138
2660	0.001168
2661	0.001182
2662	0.001354
2663	0.001343
2664	0.001715
2665	0.001297
2666	0.001255
2667	0.001353
2668	0.001517
2669	0.001575
2670	0.001834
2671	0.002034
2672	0.001884
2673	0.00146
2674	0.001509
2675	0.001814
2676	0.001796
2677	0.001433
2678	0.001476
2679	0.001652
2680	0.001592
2681	0.001502
2682	0.001627
2683	0.001654
2684	0.001467
2685	0.001426
2686	0.001664
2687	0.001592
2688	0.001623
2689	0.001332
2690	0.001214
2691	0.001255
2692	0.001352
2693	0.001218
2694	0.001201
2695	0.001248
2696	0.001135
2697	0.001399
2698	0.001926
2699	0.001825
2700	0.001319
2701	0.00127
2702	0.001231
2703	0.001288
2704	0.001344
2705	0.001287
2706	0.001359
2707	0.00134
2708	0.00116
2709	0.001325
2710	0.001472
2711	0.001487
2712	0.001476
2713	0.001412
2714	0.001503
2715	0.001339
2716	0.001172
2717	0.001012
2718	0.001351
2719	0.00146
2720	0.001675
2721	0.001632
2722	0.001325
2723	0.001152
2724	0.000962
2725	0.001085
2726	0.001644
2727	0.001619
2728	0.001424
2729	0.001378
2730	0.001493
2731	0.001232
2732	0.001371
2733	0.001487
2734	0.0014
2735	0.001242
2736	0.001256
2737	0.001367
2738	0.001429
2739	0.001329
2740	0.001476
2741	0.001468
2742	0.001391
2743	0.001247
2744	0.001647
2745	0.00178
2746	0.001672
2747	0.001444
2748	0.001386
2749	0.001372
2750	0.001185
2751	0.001155
2752	0.001126
2753	0.001123
2754	0.001249
2755	0.001397
2756	0.001569
2757	0.001355
2758	0.001342
2759	0.00139
2760	0.00141
2761	0.00129
2762	0.001305
2763	0.001277
2764	0.001338
2765	0.00112
2766	0.001294
2767	0.00142
2768	0.001285
2769	0.001196
2770	0.001469
2771	0.001553
2772	0.001347
2773	0.001107
2774	0.001162
2775	0.001389
2776	0.001563
2777	0.001503
2778	0.001473
2779	0.00139
2780	0.001312
2781	0.001304
2782	0.001108
2783	0.000971
2784	0.001024
2785	0.001227
2786	0.001404
2787	0.001518
2788	0.001734
2789	0.001687
2790	0.001305
2791	0.001204
2792	0.001571
2793	0.001647
2794	0.001386
2795	0.001472
2796	0.001525
2797	0.001405
2798	0.001461
2799	0.001507
2800	0.001398
2801	0.001487
2802	0.001989
2803	0.001758
2804	0.001376
2805	0.001335
2806	0.001204
2807	0.001291
2808	0.001558
2809	0.001489
2810	0.001243
2811	0.00119
2812	0.001265
2813	0.001339
2814	0.001481
2815	0.001633
2816	0.001639
2817	0.001552
2818	0.001409
2819	0.001482
2820	0.001512
2821	0.001381
2822	0.001113
2823	0.00146
2824	0.001474
2825	0.001321
2826	0.001345
2827	0.001477
2828	0.001621
2829	0.001529
2830	0.001637
2831	0.001726
2832	0.001712
2833	0.001687
2834	0.001523
2835	0.00135
2836	0.001252
2837	0.001376
2838	0.001284
2839	0.001332
2840	0.001579
2841	0.001805
2842	0.001782
2843	0.001712
2844	0.001534
2845	0.001427
2846	0.001369
2847	0.001559
2848	0.001551
2849	0.001469
2850	0.001475
2851	0.001599
2852	0.0015
2853	0.001378
2854	0.001626
2855	0.001553
2856	0.001623
2857	0.001527
2858	0.001335
2859	0.001375
2860	0.001174
2861	0.001539
2862	0.001669
2863	0.001711
2864	0.001672
2865	0.001965
2866	0.001654
2867	0.001514
2868	0.001319
2869	0.001408
2870	0.00143
2871	0.001504
2872	0.001361
2873	0.001199
2874	0.001012
2875	0.001025
2876	0.001357
2877	0.001595
2878	0.001625
2879	0.001448
2880	0.001312
2881	0.001272
2882	0.001514
2883	0.00188
2884	0.001796
2885	0.00154
2886	0.001408
2887	0.000938
2888	0.001097
2889	0.001493
2890	0.001807
2891	0.001766
2892	0.001706
2893	0.001472
2894	0.001274
2895	0.001298
2896	0.001344
2897	0.001512
2898	0.001551
2899	0.001782
2900	0.001985
2901	0.001953
2902	0.00169
2903	0.001684
2904	0.001795
2905	0.001683
2906	0.001516
2907	0.001639
2908	0.001599
2909	0.001581
2910	0.001513
2911	0.001557
2912	0.001448
2913	0.001448
2914	0.001589
2915	0.001873
2916	0.002047
2917	0.001759
2918	0.001673
2919	0.001322
2920	0.001429
2921	0.00128
2922	0.001226
2923	0.001465
2924	0.001547
2925	0.001451
2926	0.001524
2927	0.001712
2928	0.001486
2929	0.001553
2930	0.001407
2931	0.001288
2932	0.00128
2933	0.001596
2934	0.001921
2935	0.001921
2936	0.00184
2937	0.001466
2938	0.001395
2939	0.001456
2940	0.001661
2941	0.001821
2942	0.00175
2943	0.001533
2944	0.001563
2945	0.001589
2946	0.001593
2947	0.001464
2948	0.001746
2949	0.00173
2950	0.001539
2951	0.001559
2952	0.001717
2953	0.001655
2954	0.001555
2955	0.001651
2956	0.001507
2957	0.001435
2958	0.001236
2959	0.001095
2960	0.001065
2961	0.001249
2962	0.001255
2963	0.001462
2964	0.001488
2965	0.001668
2966	0.001596
2967	0.001399
2968	0.001338
2969	0.001378
2970	0.001732
2971	0.001801
2972	0.001708
2973	0.001724
2974	0.001702
2975	0.001589
2976	0.001716
2977	0.001714
2978	0.001336
2979	0.001384
2980	0.001584
2981	0.001824
2982	0.001837
2983	0.001781
2984	0.001512
2985	0.00127
2986	0.001359
2987	0.001224
2988	0.001228
2989	0.001395
2990	0.001558
2991	0.001549
2992	0.001542
2993	0.001565
2994	0.001473
2995	0.001636
2996	0.001544
2997	0.001446
2998	0.001445
2999	0.001567
3000	0.001636
3001	0.001654
3002	0.00125
3003	0.001166
3004	0.001391
3005	0.001698
3006	0.001671
3007	0.001512
3008	0.001589
3009	0.001674
3010	0.001578
3011	0.001366
3012	0.001399
3013	0.001533
3014	0.001712
3015	0.001732
3016	0.001609
3017	0.001464
3018	0.00161
3019	0.001678
3020	0.001756
3021	0.00188
3022	0.001968
3023	0.001377
3024	0.001359
3025	0.001497
3026	0.001438
3027	0.001526
3028	0.001242
3029	0.001235
3030	0.001247
3031	0.001385
3032	0.001607
3033	0.001897
3034	0.001542
3035	0.001704
3036	0.001804
3037	0.001783
3038	0.001852
3039	0.001802
3040	0.001828
3041	0.001736
3042	0.001746
3043	0.001861
3044	0.001903
3045	0.001807
3046	0.001584
3047	0.00154
3048	0.001522
3049	0.001845
3050	0.001881
3051	0.001508
3052	0.001341
3053	0.001259
3054	0.001787
3055	0.002072
3056	0.001878
3057	0.001707
3058	0.001357
3059	0.00124
3060	0.001369
3061	0.001562
3062	0.001525
3063	0.001525
3064	0.001592
3065	0.001853
3066	0.001754
3067	0.00164
3068	0.001707
3069	0.001545
3070	0.001269
3071	0.001034
3072	0.001051
3073	0.001481
3074	0.001596
3075	0.001762
3076	0.001766
3077	0.001399
3078	0.001129
3079	0.001136
3080	0.00127
3081	0.001619
3082	0.001611
3083	0.001866
3084	0.001903
3085	0.001874
3086	0.001766
3087	0.001446
3088	0.001336
3089	0.001612
3090	0.001763
3091	0.001755
3092	0.001597
3093	0.001391
3094	0.001442
3095	0.001525
3096	0.001577
3097	0.00181
3098	0.00156
3099	0.00116
3100	0.001239
3101	0.001262
3102	0.001436
3103	0.001601
3104	0.001916
3105	0.001676
3106	0.001433
3107	0.001447
3108	0.001701
3109	0.001719
3110	0.001678
3111	0.00158
3112	0.001538
3113	0.001602
3114	0.001542
3115	0.00165
3116	0.001543
3117	0.001578
3118	0.001704
3119	0.001767
3120	0.001654
3121	0.001343
3122	0.001347
3123	0.001386
3124	0.001705
3125	0.00192
3126	0.001716
3127	0.001379
3128	0.001454
3129	0.001513
3130	0.001619
3131	0.001971
3132	0.002076
3133	0.002018
3134	0.001953
3135	0.001904
3136	0.001675
3137	0.001508
3138	0.001719
3139	0.001719
3140	0.001771
3141	0.001556
3142	0.001556
3143	0.001424
3144	0.001335
3145	0.001488
3146	0.001753
3147	0.001782
3148	0.001889
3149	0.001652
3150	0.00171
3151	0.001674
3152	0.001399
3153	0.001447
3154	0.001544
3155	0.001573
3156	0.001529
3157	0.001291
3158	0.001505
3159	0.001523
3160	0.001269
3161	0.001327
3162	0.001382
3163	0.001806
3164	0.001619
3165	0.001539
3166	0.001803
3167	0.001721
3168	0.001397
3169	0.001181
3170	0.001152
3171	0.001408
3172	0.001793
3173	0.001586
3174	0.001192
3175	0.001503
3176	0.001831
3177	0.001813
3178	0.001821
3179	0.001725
3180	0.001484
3181	0.00126
3182	0.001529
3183	0.001769
3184	0.001836
3185	0.001703
3186	0.001696
3187	0.001664
3188	0.001752
3189	0.001818
3190	0.001755
3191	0.001551
3192	0.001489
3193	0.001536
3194	0.001651
3195	0.00148
3196	0.00128
3197	0.001282
3198	0.001419
3199	0.001485
3200	0.001742
3201	0.001582
3202	0.001504
3203	0.001573
3204	0.001633
3205	0.001757
3206	0.001521
3207	0.001348
3208	0.001242
3209	0.001535
3210	0.001712
3211	0.001573
3212	0.001693
3213	0.001719
3214	0.001432
3215	0.001421
3216	0.001491
3217	0.001419
3218	0.0015
3219	0.001554
3220	0.001642
3221	0.001759
3222	0.001512
3223	0.001717
3224	0.001979
3225	0.002149
3226	0.001961
3227	0.001684
3228	0.001472
3229	0.001399
3230	0.0015
3231	0.001881
3232	0.001925
3233	0.001741
3234	0.001794
3235	0.00159
3236	0.001344
3237	0.001441
3238	0.00177
3239	0.001871
3240	0.00155
3241	0.001759
3242	0.001889
3243	0.001872
3244	0.001563
3245	0.001339
3246	0.001271
3247	0.001286
3248	0.001247
3249	0.001258
3250	0.001385
3251	0.00148
3252	0.001649
3253	0.001436
3254	0.00126
3255	0.001423
3256	0.001851
3257	0.00162
3258	0.001486
3259	0.001537
3260	0.001558
3261	0.001618
3262	0.001462
3263	0.001419
3264	0.00115
3265	0.001451
3266	0.001645
3267	0.001681
3268	0.001464
3269	0.001648
3270	0.001658
3271	0.001534
3272	0.001359
3273	0.001466
3274	0.001531
3275	0.001531
3276	0.001301
3277	0.001283
3278	0.00147
3279	0.001705
3280	0.001828
3281	0.001826
3282	0.001973
3283	0.00204
3284	0.001695
3285	0.001371
3286	0.001446
3287	0.00157
3288	0.001437
3289	0.001202
3290	0.001433
3291	0.001362
3292	0.001404
3293	0.00153
3294	0.001874
3295	0.001736
3296	0.001579
3297	0.001642
3298	0.001706
3299	0.00143
3300	0.001642
3301	0.001692
3302	0.001646
3303	0.001382
3304	0.001317
3305	0.001398
3306	0.001727
3307	0.002016
3308	0.002131
3309	0.001758
3310	0.001683
3311	0.001522
3312	0.001296
3313	0.001226
3314	0.001497
3315	0.00156
3316	0.001528
3317	0.001437
3318	0.001466
3319	0.00146
3320	0.00143
3321	0.001467
3322	0.001516
3323	0.001545
3324	0.001532
3325	0.001714
3326	0.001833
3327	0.001598
3328	0.001414
3329	0.001382
3330	0.001469
3331	0.001729
3332	0.001589
3333	0.00172
3334	0.001712
3335	0.001647
3336	0.001542
3337	0.001397
3338	0.001473
3339	0.001671
3340	0.001586
3341	0.001659
3342	0.001552
3343	0.001532
3344	0.001469
3345	0.001709
3346	0.001848
3347	0.001628
3348	0.001456
3349	0.001668
3350	0.00156
3351	0.001593
3352	0.002133
3353	0.001964
3354	0.001542
3355	0.00136
3356	0.001361
3357	0.001217
3358	0.001293
3359	0.00182
3360	0.002124
3361	0.002187
3362	0.001803
3363	0.001504
3364	0.001326
3365	0.001332
3366	0.001386
3367	0.001432
3368	0.001319
3369	0.001357
3370	0.001512
3371	0.001564
3372	0.001608
3373	0.001495
3374	0.001682
3375	0.001763
3376	0.001903
3377	0.002185
3378	0.002295
3379	0.001886
3380	0.001694
3381	0.001916
3382	0.00221
3383	0.001927
3384	0.001663
3385	0.001656
3386	0.001718
3387	0.001526
3388	0.001513
3389	0.001551
3390	0.001447
3391	0.001707
3392	0.001858
3393	0.001644
3394	0.001682
3395	0.001984
3396	0.002037
3397	0.001731
3398	0.00181
3399	0.001601
3400	0.001672
3401	0.001775
3402	0.001572
3403	0.001702
3404	0.001821
3405	0.001647
3406	0.001475
3407	0.001742
3408	0.001778
3409	0.001609
3410	0.001299
3411	0.001279
3412	0.00153
3413	0.001576
3414	0.001785
3415	0.001857
3416	0.001905
3417	0.001873
3418	0.001786
3419	0.001576
3420	0.001355
3421	0.001134
3422	0.001239
3423	0.001622
3424	0.001873
3425	0.001961
3426	0.001897
3427	0.001852
3428	0.001714
3429	0.001439
3430	0.001741
3431	0.001981
3432	0.002028
3433	0.001894
3434	0.001757
3435	0.001798
3436	0.001967
3437	0.00179
3438	0.001917
3439	0.002101
3440	0.00189
3441	0.001459
3442	0.001132
3443	0.001416
3444	0.001783
3445	0.002092
3446	0.002169
3447	0.002004
3448	0.001611
3449	0.001345
3450	0.001328
3451	0.001526
3452	0.001699
3453	0.001739
3454	0.001573
3455	0.001355
3456	0.001209
3457	0.001325
3458	0.001575
3459	0.001881
3460	0.002027
3461	0.0019
3462	0.00156
3463	0.001453
3464	0.001585
3465	0.001663
3466	0.001685
3467	0.001682
3468	0.001619
3469	0.001643
3470	0.001689
3471	0.001587
3472	0.001591
3473	0.001702
3474	0.001615
3475	0.001667
3476	0.001601
3477	0.001653
3478	0.001724
3479	0.001891
3480	0.001795
3481	0.001539
3482	0.001341
3483	0.001273
3484	0.001415
3485	0.001474
3486	0.001541
3487	0.001559
3488	0.001746
3489	0.002011
3490	0.001851
3491	0.001996
3492	0.002095
3493	0.001907
3494	0.001987
3495	0.002255
3496	0.002155
3497	0.001741
3498	0.001613
3499	0.001576
3500	0.001682
3501	0.00159
3502	0.001517
3503	0.001474
3504	0.001234
3505	0.001215
3506	0.001371
3507	0.001424
3508	0.001694
3509	0.001897
3510	0.002011
3511	0.001743
3512	0.001471
3513	0.001374
3514	0.001489
3515	0.00158
3516	0.001884
3517	0.001648
3518	0.001585
3519	0.001645
3520	0.001667
3521	0.001512
3522	0.001547
3523	0.001697
3524	0.001785
3525	0.001809
3526	0.001656
3527	0.001548
3528	0.001623
3529	0.001645
3530	0.001539
3531	0.001479
3532	0.00152
3533	0.001439
3534	0.00125
3535	0.001408
3536	0.001868
3537	0.002013
3538	0.001887
3539	0.001711
3540	0.001732
3541	0.001637
3542	0.001664
3543	0.001754
3544	0.001735
3545	0.001871
3546	0.001892
3547	0.001785
3548	0.001885
3549	0.001906
3550	0.001919
3551	0.0019
3552	0.001875
3553	0.001789
3554	0.001569
3555	0.00143
3556	0.001516
3557	0.00191
3558	0.00171
3559	0.001669
3560	0.001564
3561	0.001539
3562	0.001594
3563	0.001719
3564	0.001812
3565	0.001645
3566	0.001528
3567	0.001392
3568	0.001502
3569	0.001547
3570	0.001658
3571	0.001687
3572	0.001783
3573	0.001601
3574	0.001548
3575	0.001385
3576	0.001575
3577	0.001756
3578	0.001688
3579	0.001763
3580	0.002049
3581	0.002126
3582	0.002008
3583	0.001907
3584	0.001778
3585	0.001746
3586	0.001796
3587	0.00174
3588	0.001627
3589	0.001637
3590	0.001634
3591	0.001729
3592	0.001654
3593	0.001644
3594	0.001649
3595	0.001577
3596	0.001503
3597	0.001717
3598	0.001976
3599	0.001719
3600	0.001613
3601	0.001948
3602	0.001859
3603	0.001772
3604	0.001717
3605	0.001752
3606	0.001891
3607	0.001978
3608	0.002303
3609	0.002192
3610	0.001664
3611	0.001704
3612	0.001677
3613	0.001485
3614	0.001467
3615	0.001687
3616	0.00184
3617	0.001908
3618	0.001721
3619	0.001419
3620	0.001362
3621	0.001598
3622	0.001767
3623	0.001953
3624	0.001907
3625	0.001511
3626	0.001556
3627	0.001823
3628	0.001942
3629	0.001654
3630	0.001894
3631	0.001994
3632	0.001735
3633	0.001713
3634	0.001508
3635	0.001425
3636	0.00139
3637	0.001669
3638	0.001609
3639	0.001541
3640	0.001488
3641	0.00148
3642	0.001686
3643	0.001928
3644	0.001717
3645	0.00147
3646	0.001486
3647	0.001611
3648	0.001629
3649	0.001641
3650	0.001459
3651	0.001264
3652	0.001522
3653	0.001603
3654	0.00159
3655	0.001651
3656	0.001855
3657	0.001843
3658	0.001618
3659	0.001689
3660	0.001723
3661	0.001517
3662	0.001551
3663	0.001532
3664	0.001625
3665	0.001719
3666	0.001946
3667	0.001998
3668	0.001739
3669	0.001542
3670	0.001398
3671	0.001533
3672	0.001615
3673	0.001957
3674	0.002048
3675	0.001865
3676	0.001816
3677	0.001893
3678	0.00187
3679	0.002004
3680	0.001792
3681	0.001308
3682	0.001482
3683	0.001593
3684	0.001499
3685	0.00142
3686	0.001835
3687	0.002037
3688	0.001884
3689	0.001345
3690	0.00131
3691	0.001647
3692	0.00194
3693	0.001831
3694	0.001488
3695	0.001481
3696	0.001719
3697	0.00194
3698	0.001866
3699	0.001695
3700	0.001738
3701	0.001604
3702	0.001607
3703	0.001789
3704	0.002054
3705	0.002024
3706	0.001754
3707	0.001587
3708	0.001714
3709	0.001851
3710	0.001966
3711	0.001805
3712	0.001755
3713	0.001652
3714	0.00167
3715	0.001561
3716	0.001895
3717	0.002011
3718	0.001661
3719	0.001466
3720	0.001748
3721	0.001949
3722	0.00192
3723	0.001941
3724	0.001921
3725	0.001808
3726	0.001753
3727	0.001669
3728	0.00169
3729	0.0015
3730	0.001588
3731	0.001672
3732	0.00169
3733	0.001677
3734	0.001946
3735	0.002154
3736	0.002088
3737	0.001926
3738	0.001892
3739	0.001738
3740	0.001528
3741	0.001613
3742	0.001337
3743	0.001412
3744	0.00151
3745	0.001589
3746	0.001594
3747	0.001679
3748	0.001326
3749	0.001185
3750	0.00166
3751	0.001867
3752	0.001687
3753	0.001542
3754	0.001533
3755	0.001477
3756	0.001545
3757	0.001735
3758	0.001546
3759	0.001676
3760	0.001904
3761	0.001805
3762	0.001895
3763	0.002176
3764	0.00205
3765	0.001726
3766	0.001877
3767	0.002105
3768	0.00192
3769	0.0017
3770	0.001469
3771	0.001679
3772	0.001808
3773	0.001962
3774	0.00168
3775	0.001441
3776	0.001555
3777	0.001693
3778	0.001612
3779	0.001774
3780	0.001892
3781	0.001875
3782	0.00165
3783	0.001575
3784	0.001647
3785	0.001504
3786	0.001397
3787	0.001582
3788	0.001692
3789	0.001777
3790	0.001585
3791	0.001668
3792	0.001719
3793	0.001812
3794	0.002036
3795	0.002094
3796	0.002116
3797	0.001853
3798	0.001869
3799	0.002095
3800	0.002382
3801	0.002373
3802	0.001704
3803	0.001391
3804	0.001526
3805	0.001897
3806	0.002012
3807	0.001944
3808	0.002074
3809	0.002042
3810	0.001756
3811	0.001539
3812	0.001658
3813	0.001793
3814	0.001944
3815	0.001879
3816	0.001988
3817	0.001848
3818	0.001924
3819	0.001863
3820	0.001763
3821	0.001858
3822	0.00207
3823	0.001996
3824	0.001729
3825	0.001796
3826	0.00174
3827	0.001728
3828	0.00159
3829	0.001631
3830	0.001915
3831	0.002191
3832	0.001928
3833	0.001655
3834	0.001955
3835	0.002015
3836	0.001999
3837	0.001807
3838	0.001925
3839	0.001777
3840	0.001772
3841	0.001832
3842	0.001779
3843	0.001753
3844	0.001715
3845	0.001732
3846	0.001834
3847	0.002056
3848	0.001874
3849	0.001666
3850	0.001631
3851	0.001967
3852	0.002067
3853	0.001529
3854	0.001307
3855	0.001426
3856	0.001604
3857	0.001653
3858	0.001814
3859	0.001682
3860	0.001538
3861	0.001888
3862	0.002026
3863	0.00215
3864	0.002031
3865	0.001982
3866	0.001986
3867	0.002057
3868	0.001907
3869	0.001856
3870	0.001658
3871	0.001794
3872	0.001574
3873	0.001359
3874	0.001258
3875	0.001178
3876	0.001366
3877	0.001885
3878	0.002367
3879	0.002324
3880	0.001755
3881	0.001502
3882	0.001659
3883	0.002052
3884	0.002052
3885	0.001876
3886	0.001673
3887	0.001859
3888	0.001701
3889	0.001644
3890	0.001637
3891	0.001426
3892	0.00146
3893	0.001567
3894	0.001673
3895	0.00169
3896	0.001591
3897	0.001598
3898	0.001601
3899	0.001681
3900	0.002072
3901	0.002225
3902	0.001959
3903	0.001878
3904	0.002028
3905	0.002021
3906	0.001689
3907	0.001626
3908	0.001776
3909	0.001738
3910	0.001467
3911	0.001351
3912	0.001578
3913	0.001624
3914	0.001588
3915	0.001629
3916	0.00147
3917	0.001639
3918	0.001666
3919	0.001917
3920	0.001752
3921	0.002057
3922	0.002252
3923	0.002069
3924	0.001732
3925	0.001685
3926	0.001723
3927	0.00163
3928	0.001581
3929	0.001735
3930	0.0015
3931	0.001505
3932	0.001653
3933	0.001782
3934	0.001652
3935	0.001899
3936	0.001947
3937	0.001937
3938	0.001833
3939	0.00201
3940	0.001947
3941	0.001914
3942	0.001553
3943	0.001603
3944	0.00155
3945	0.001883
3946	0.001958
3947	0.001936
3948	0.001925
3949	0.001903
3950	0.00182
3951	0.001711
3952	0.001621
3953	0.001656
3954	0.001699
3955	0.001485
3956	0.001572
3957	0.001468
3958	0.001717
3959	0.00171
3960	0.001733
3961	0.001973
3962	0.002056
3963	0.001723
3964	0.00176
3965	0.001915
3966	0.002001
3967	0.001841
3968	0.001686
3969	0.001738
3970	0.001759
3971	0.001949
3972	0.002075
3973	0.00171
3974	0.001734
3975	0.00183
3976	0.002039
3977	0.002181
3978	0.002177
3979	0.001678
3980	0.001599
3981	0.00157
3982	0.001651
3983	0.001557
3984	0.001363
3985	0.001529
3986	0.001741
3987	0.001788
3988	0.001529
3989	0.00163
3990	0.001715
3991	0.001507
3992	0.001684
3993	0.001819
3994	0.001577
3995	0.001353
3996	0.001262
3997	0.001612
3998	0.001717
3999	0.001648
4000	0.001663
4001	0.001763
4002	0.001653
4003	0.00177
4004	0.001686
4005	0.001625
4006	0.001637
4007	0.001781
4008	0.00198
4009	0.001881
4010	0.001687
4011	0.001528
4012	0.001526
4013	0.001933
4014	0.002055
4015	0.001952
4016	0.001907
4017	0.001949
4018	0.001956
4019	0.00166
4020	0.00166
4021	0.001919
4022	0.00185
4023	0.001776
4024	0.001679
4025	0.001748
4026	0.002097
4027	0.001851
4028	0.001654
4029	0.00172
4030	0.001533
4031	0.001855
4032	0.00189
4033	0.001902
4034	0.001801
4035	0.001741
4036	0.001833
4037	0.002048
4038	0.00183
4039	0.001532
4040	0.001498
4041	0.001659
4042	0.001789
4043	0.001867
4044	0.001799
4045	0.001643
4046	0.001994
4047	0.001969
4048	0.001999
4049	0.001935
4050	0.002158
4051	0.002185
4052	0.002005
4053	0.001545
4054	0.001517
4055	0.001957
4056	0.001957
4057	0.002054
4058	0.001857
4059	0.001731
4060	0.001625
4061	0.001556
4062	0.001605
4063	0.001811
4064	0.001702
4065	0.001855
4066	0.001871
4067	0.00224
4068	0.002219
4069	0.002091
4070	0.001582
4071	0.001755
4072	0.00186
4073	0.001918
4074	0.001639
4075	0.001679
4076	0.001881
4077	0.002144
4078	0.002007
4079	0.002091
4080	0.002
4081	0.002139
4082	0.002351
4083	0.002445
4084	0.002229
4085	0.001942
4086	0.001967
4087	0.002018
4088	0.002109
4089	0.002029
4090	0.001715
4091	0.001534
4092	0.001619
4093	0.001888
4094	0.001966
4095	0.001808
4096	0.00147
4097	0.00174
4098	0.001867
4099	0.001753
4100	0.001683
4101	0.001673
4102	0.001542
4103	0.001569
4104	0.00176
4105	0.002014
4106	0.001965
4107	0.001839
4108	0.001844
4109	0.001869
4110	0.002081
4111	0.002145
4112	0.00206
4113	0.002079
4114	0.002095
4115	0.00209
4116	0.001628
4117	0.001569
4118	0.002031
4119	0.001989
4120	0.001775
4121	0.001857
4122	0.001846
4123	0.001961
4124	0.002145
4125	0.002319
4126	0.002112
4127	0.0019
4128	0.001573
4129	0.001517
4130	0.001698
4131	0.001927
4132	0.001914
4133	0.002079
4134	0.002227
4135	0.002125
4136	0.001549
4137	0.00137
4138	0.001605
4139	0.001635
4140	0.001821
4141	0.002211
4142	0.002303
4143	0.002167
4144	0.00185
4145	0.002043
4146	0.002206
4147	0.002103
4148	0.001704
4149	0.001398
4150	0.001833
4151	0.002052
4152	0.002033
4153	0.001888
4154	0.001769
4155	0.001644
4156	0.001813
4157	0.002162
4158	0.002138
4159	0.002235
4160	0.001946
4161	0.001732
4162	0.001538
4163	0.001507
4164	0.001581
4165	0.001528
4166	0.001512
4167	0.001629
4168	0.001698
4169	0.002143
4170	0.002353
4171	0.002206
4172	0.002039
4173	0.001836
4174	0.001782
4175	0.002185
4176	0.002477
4177	0.002504
4178	0.002198
4179	0.001893
4180	0.001918
4181	0.001929
4182	0.001926
4183	0.001899
4184	0.001999
4185	0.002074
4186	0.00212
4187	0.002071
4188	0.001883
4189	0.002055
4190	0.001931
4191	0.001983
4192	0.002165
4193	0.002149
4194	0.002156
4195	0.00237
4196	0.002477
4197	0.002203
4198	0.001843
4199	0.001715
4200	0.001769
4201	0.001883
4202	0.001942
4203	0.001883
4204	0.001868
4205	0.002028
4206	0.002295
4207	0.002041
4208	0.001708
4209	0.001486
4210	0
4211	0
4212	6.4e-05
4213	-0.000104
4214	-0.000316
4215	-0.000444
4216	-0.000249
4217	-0.000204
4218	-0.000237
4219	-0.000428
4220	-0.000329
4221	-0.00026
4222	-0.000188
4223	-7.7e-05
4224	-4.9e-05
4225	-0.000106
4226	-0.000242
4227	-0.000126
4228	-0.000103
4229	7e-06
4230	0.000179
4231	2.9e-05
4232	-4.7e-05
4233	-8.4e-05
4234	-2.9e-05
4235	5.1e-05
4236	-9.4e-05
4237	-0.000182
4238	4.6e-05
4239	2.9e-05
4240	-0.000166
4241	-0.000262
4242	-0.000144
4243	2.3e-05
4244	0.00018
4245	-7.7e-05
4246	-0.000291
4247	-0.00027
4248	-7.5e-05
4249	-0.000166
4250	-0.000259
4251	-0.000398
4252	-5.4e-05
4253	0.000377
4254	0.000272
4255	-4.4e-05
4256	-0.000344
4257	3.5e-05
4258	0.000171
4259	9.6e-05
4260	4.4e-05
4261	5e-06
4262	4e-06
4263	0.000302
4264	0.000258
4265	9.8e-05
4266	-0.000244
4267	-0.000135
4268	-7.9e-05
4269	-2e-05
4270	8e-06
4271	-0.000187
4272	-0.000259
4273	-0.000122
4274	0.00015
4275	-3e-06
4276	-0.000141
4277	-0.000267
4278	-0.000263
4279	-0.000266
4280	-0.000103
4281	-0.000305
4282	-0.000389
4283	-0.000443
4284	-0.00013
4285	-8.4e-05
4286	-0.000225
4287	-0.00039
4288	-0.000435
4289	-8.3e-05
4290	0.000217
4291	0.000363
4292	-2.9e-05
4293	-4e-05
4294	-0.000103
4295	-0.000106
4296	-0.000158
4297	-7.7e-05
4298	-0.000166
4299	-0.000498
4300	-0.000495
4301	-0.000367
4302	-6.6e-05
4303	0.000323
4304	0.000421
4305	0.000327
4306	0.000575
4307	0.000326
4308	-0.000271
4309	-0.000375
4310	-0.000294
4311	-0.000182
4312	-0.000107
4313	-8.7e-05
4314	8.5e-05
4315	0.00019
4316	0.000351
4317	-3.2e-05
4318	3.2e-05
4319	3.4e-05
4320	9.8e-05
4321	2.3e-05
4322	-6.1e-05
4323	0.000232
4324	0.000298
4325	-0.000173
4326	-0.000483
4327	-0.000592
4328	-0.000497
4329	-0.000239
4330	-3.5e-05
4331	-3.7e-05
4332	0.000118
4333	-1e-06
4334	-0.000172
4335	-0.000136
4336	4.5e-05
4337	1.3e-05
4338	-0.000273
4339	-0.000142
4340	5e-06
4341	6.2e-05
4342	0.000162
4343	9.7e-05
4344	4.3e-05
4345	-4.9e-05
4346	-7.4e-05
4347	1.1e-05
4348	-0.000396
4349	-0.000361
4350	-0.000347
4351	-0.000135
4352	-0.000183
4353	9.6e-05
4354	0.000435
4355	0.000319
4356	-2.9e-05
4357	-0.000313
4358	-0.00011
4359	0.000202
4360	0.000311
4361	4e-06
4362	1.9e-05
4363	-5.7e-05
4364	-0.000197
4365	-0.00029
4366	7.1e-05
4367	0.000123
4368	-0.000196
4369	-0.000398
4370	-0.000256
4371	0.000106
4372	0.000197
4373	3.8e-05
4374	-3e-05
4375	0.000172
4376	1.6e-05
4377	-0.000108
4378	-0.000127
4379	4.2e-05
4380	0.000256
4381	0.000375
4382	0.000467
4383	0.000398
4384	4.3e-05
4385	0.000245
4386	9.8e-05
4387	0.000234
4388	0.000354
4389	0.000179
4390	0.000234
4391	0.000162
4392	6.4e-05
4393	-0.0001
4394	-0.00026
4395	-0.000194
4396	-0.000146
4397	8.7e-05
4398	0.000205
[truncated: 3,401 more rows]
