# Supplementary material for: Homo-oligomerization of the human adenosine A2A receptor is driven by the intrinsically disordered C-terminus
Source: eLife. 2021 Jul 16;10:e66662. doi: 10.7554/eLife.66662 (PMC8328514; doi:10.7554/eLife.66662)
Supplement: Figure 3—source data 1. [file elife-66662-fig3-data1.xlsx]

## Sheet: FL-WT (A)
Time	UV
6000	-0.000172
6001	-0.000175
6002	-0.000163
6003	-0.00017
6004	-0.000176
6005	-0.000184
6006	-0.000206
6007	-0.00024
6008	-0.000319
6009	-0.00032
6010	-0.000266
6011	-0.000231
6012	-0.000193
6013	-0.000182
6014	-0.000214
6015	-0.000215
6016	-0.000214
6017	-0.000179
6018	-0.000194
6019	-0.000224
6020	-0.000252
6021	-0.000268
6022	-0.000298
6023	-0.000284
6024	-0.000248
6025	-0.000268
6026	-0.000293
6027	-0.000293
6028	-0.000302
6029	-0.00031
6030	-0.000283
6031	-0.000304
6032	-0.000324
6033	-0.000353
6034	-0.000357
6035	-0.000321
6036	-0.000309
6037	-0.000285
6038	-0.000233
6039	-0.000201
6040	-0.000228
6041	-0.000287
6042	-0.000313
6043	-0.000319
6044	-0.000307
6045	-0.00035
6046	-0.000346
6047	-0.000338
6048	-0.000347
6049	-0.000381
6050	-0.000385
6051	-0.000396
6052	-0.000386
6053	-0.000378
6054	-0.000339
6055	-0.000319
6056	-0.000307
6057	-0.000314
6058	-0.000325
6059	-0.000348
6060	-0.000357
6061	-0.000346
6062	-0.000332
6063	-0.00032
6064	-0.000342
6065	-0.00034
6066	-0.000341
6067	-0.000346
6068	-0.000347
6069	-0.000295
6070	-0.000257
6071	-0.000231
6072	-0.000244
6073	-0.000297
6074	-0.000295
6075	-0.000282
6076	-0.000293
6077	-0.000292
6078	-0.000302
6079	-0.000358
6080	-0.000378
6081	-0.000341
6082	-0.000326
6083	-0.000368
6084	-0.00037
6085	-0.000358
6086	-0.000347
6087	-0.000362
6088	-0.000364
6089	-0.000357
6090	-0.000342
6091	-0.00035
6092	-0.000351
6093	-0.000372
6094	-0.000401
6095	-0.000413
6096	-0.00044
6097	-0.000462
6098	-0.000451
6099	-0.000452
6100	-0.000462
6101	-0.000483
6102	-0.000485
6103	-0.000503
6104	-0.000517
6105	-0.000528
6106	-0.000489
6107	-0.000437
6108	-0.00044
6109	-0.00047
6110	-0.000451
6111	-0.000404
6112	-0.000373
6113	-0.000338
6114	-0.000313
6115	-0.00035
6116	-0.000351
6117	-0.000296
6118	-0.000232
6119	-0.00027
6120	-0.000294
6121	-0.000305
6122	-0.000359
6123	-0.000367
6124	-0.000322
6125	-0.000304
6126	-0.000307
6127	-0.000296
6128	-0.000292
6129	-0.000273
6130	-0.000294
6131	-0.00031
6132	-0.000317
6133	-0.000342
6134	-0.000367
6135	-0.000386
6136	-0.000378
6137	-0.000376
6138	-0.000394
6139	-0.000423
6140	-0.000445
6141	-0.000455
6142	-0.000504
6143	-0.000506
6144	-0.00047
6145	-0.000433
6146	-0.000414
6147	-0.000393
6148	-0.000342
6149	-0.000303
6150	-0.000287
6151	-0.000325
6152	-0.000379
6153	-0.000387
6154	-0.000387
6155	-0.000404
6156	-0.000399
6157	-0.000402
6158	-0.000406
6159	-0.000434
6160	-0.000381
6161	-0.000353
6162	-0.00037
6163	-0.000377
6164	-0.000331
6165	-0.000334
6166	-0.000378
6167	-0.000423
6168	-0.000428
6169	-0.000428
6170	-0.000407
6171	-0.000399
6172	-0.00039
6173	-0.000369
6174	-0.000358
6175	-0.00036
6176	-0.000326
6177	-0.000277
6178	-0.000297
6179	-0.000339
6180	-0.00036
6181	-0.00038
6182	-0.000411
6183	-0.000424
6184	-0.000426
6185	-0.000422
6186	-0.00041
6187	-0.000418
6188	-0.000443
6189	-0.000478
6190	-0.000484
6191	-0.000484
6192	-0.000468
6193	-0.000474
6194	-0.000488
6195	-0.000484
6196	-0.000437
6197	-0.000369
6198	-0.000321
6199	-0.000311
6200	-0.000339
6201	-0.000365
6202	-0.000401
6203	-0.000404
6204	-0.000396
6205	-0.000385
6206	-0.000384
6207	-0.000377
6208	-0.000375
6209	-0.000376
6210	-0.000385
6211	-0.000385
6212	-0.000399
6213	-0.000382
6214	-0.000328
6215	-0.000283
6216	-0.000284
6217	-0.000322
6218	-0.000333
6219	-0.000323
6220	-0.000307
6221	-0.00036
6222	-0.000395
6223	-0.000391
6224	-0.000342
6225	-0.000288
6226	-0.000294
6227	-0.000322
6228	-0.00032
6229	-0.000296
6230	-0.000286
6231	-0.000274
6232	-0.000279
6233	-0.000271
6234	-0.000268
6235	-0.000283
6236	-0.00031
6237	-0.000292
6238	-0.000245
6239	0
6240	0
6241	1.5e-05
6242	-4e-06
6243	-4e-05
6244	-4.4e-05
6245	-1.6e-05
6246	-2.5e-05
6247	-4.4e-05
6248	-3.6e-05
6249	-1.6e-05
6250	-1.3e-05
6251	-2.8e-05
6252	-2.8e-05
6253	-4.8e-05
6254	-8.7e-05
6255	-9.7e-05
6256	-5.5e-05
6257	-4e-05
6258	-6.9e-05
6259	-9.5e-05
6260	-9.5e-05
6261	-0.000126
6262	-0.000142
6263	-0.00016
6264	-0.000163
6265	-0.000164
6266	-0.000177
6267	-0.000186
6268	-0.000157
6269	-0.000151
6270	-0.000172
6271	-0.000204
6272	-0.000202
6273	-0.000169
6274	-0.000127
6275	-0.000125
6276	-0.000121
6277	-0.000127
6278	-0.000141
6279	-0.000127
6280	-0.0001
6281	-0.000123
6282	-0.000128
6283	-0.000127
6284	-9.9e-05
6285	-9.6e-05
6286	-0.000126
6287	-0.000131
6288	-0.000127
6289	-0.000144
6290	-0.000135
6291	-0.000116
6292	-0.000107
6293	-0.000116
6294	-0.000153
6295	-0.0002
6296	-0.000246
6297	-0.000253
6298	-0.000257
6299	-0.000263
6300	-0.000271
6301	-0.000257
6302	-0.000191
6303	-0.000165
6304	-0.000183
6305	-0.000216
6306	-0.000229
6307	-0.000236
6308	-0.000262
6309	-0.000278
6310	-0.000263
6311	-0.000226
6312	-0.000159
6313	-0.000127
6314	-0.000106
6315	-0.000108
6316	-9.7e-05
6317	-0.000111
6318	-0.000146
6319	-0.000172
6320	-0.000161
6321	-0.000139
6322	-0.000143
6323	-0.000148
6324	-0.000135
6325	-9.8e-05
6326	-9.5e-05
6327	-6.4e-05
6328	-2.5e-05
6329	-2.7e-05
6330	-6.5e-05
6331	-0.000103
6332	-0.000138
6333	-0.000173
6334	-0.000198
6335	-0.000209
6336	-0.000178
6337	-0.000134
6338	-7.5e-05
6339	-5.8e-05
6340	-6e-05
6341	-6.7e-05
6342	-6.3e-05
6343	-6.3e-05
6344	-8.5e-05
6345	-9.6e-05
6346	-8.5e-05
6347	0
6348	2.8e-05
6349	3.9e-05
6350	3e-05
6351	2.1e-05
6352	3.6e-05
6353	5.4e-05
6354	0.000107
6355	0.000144
6356	0.000143
6357	0.00012
6358	0.000111
6359	0.000113
6360	7.4e-05
6361	1.7e-05
6362	3.8e-05
6363	6.5e-05
6364	7e-05
6365	5.6e-05
6366	7.4e-05
6367	0.000114
6368	0.00011
6369	4.8e-05
6370	1.6e-05
6371	3.9e-05
6372	7.6e-05
6373	8.7e-05
6374	9.4e-05
6375	8.8e-05
6376	5.3e-05
6377	4.5e-05
6378	4.7e-05
6379	4.6e-05
6380	2.8e-05
6381	3.1e-05
6382	3.2e-05
6383	6e-06
6384	1e-05
6385	2.9e-05
6386	6.8e-05
6387	8.7e-05
6388	7.2e-05
6389	4.1e-05
6390	5.1e-05
6391	3.3e-05
6392	-1.9e-05
6393	-5.7e-05
6394	-6.2e-05
6395	-8.3e-05
6396	-0.000117
6397	-0.000127
6398	-0.000107
6399	-0.000116
6400	-8.6e-05
6401	-6.1e-05
6402	-8e-05
6403	-0.00012
6404	-0.000127
6405	-0.000115
6406	-9.8e-05
6407	-8.3e-05
6408	-8.4e-05
6409	-9.2e-05
6410	-0.000111
6411	-0.00013
6412	-7.6e-05
6413	-4.7e-05
6414	1e-05
6415	-1.1e-05
6416	-4.7e-05
6417	-7e-05
6418	-4.3e-05
6419	-3e-06
6420	8e-06
6421	-2e-06
6422	1e-05
6423	-1.7e-05
6424	-4.8e-05
6425	-6.4e-05
6426	-7.7e-05
6427	-5e-05
6428	-2.1e-05
6429	-5.1e-05
6430	-0.0001
6431	-0.00013
6432	-0.000117
6433	-7.8e-05
6434	-5.6e-05
6435	-5.2e-05
6436	-6e-05
6437	-5.9e-05
6438	-4.1e-05
6439	-6.4e-05
6440	-0.000165
6441	-0.000238
6442	-0.000253
6443	-0.000239
6444	-0.000277
6445	-0.000289
6446	-0.000276
6447	-0.000302
6448	-0.000376
6449	-0.000439
6450	-0.000412
6451	-0.000361
6452	-0.000322
6453	-0.00035
6454	-0.000356
6455	-0.000389
6456	-0.00034
6457	-0.000312
6458	-0.000315
6459	-0.00034
6460	-0.000328
6461	-0.000341
6462	-0.000365
6463	-0.000375
6464	-0.000382
6465	-0.000377
6466	-0.000375
6467	-0.000397
6468	-0.00039
6469	-0.000355
6470	-0.000314
6471	-0.000339
6472	-0.000376
6473	-0.000385
6474	-0.000353
6475	-0.000319
6476	-0.000272
6477	-0.000268
6478	-0.00028
6479	-0.000293
6480	-0.000262
6481	-0.000259
6482	-0.000319
6483	-0.000398
6484	-0.000427
6485	-0.00043
6486	-0.000438
6487	-0.000487
6488	-0.000504
6489	-0.000514
6490	-0.000551
6491	-0.000555
6492	-0.000529
6493	-0.000513
6494	-0.000542
6495	-0.000553
6496	-0.000538
6497	-0.000509
6498	-0.000508
6499	-0.000499
6500	-0.000497
6501	-0.000481
6502	-0.000506
6503	-0.000517
6504	-0.000524
6505	-0.000505
6506	-0.000482
6507	-0.000435
6508	-0.000393
6509	-0.000389
6510	-0.000469
6511	-0.000501
6512	-0.000496
6513	-0.0005
6514	-0.000538
6515	-0.000539
6516	-0.000513
6517	-0.000478
6518	-0.000447
6519	-0.000436
6520	-0.000451
6521	-0.000464
6522	-0.000481
6523	-0.000477
6524	-0.000502
6525	-0.000514
6526	-0.000518
6527	-0.0005
6528	-0.00049
6529	-0.000471
6530	-0.000457
6531	-0.00045
6532	-0.000477
6533	-0.000473
6534	-0.000457
6535	-0.000472
6536	-0.00048
6537	-0.000472
6538	-0.000465
6539	-0.000423
6540	-0.000432
6541	-0.000493
6542	-0.000468
6543	-0.000397
6544	-0.00037
6545	-0.000428
6546	-0.000465
6547	-0.000489
6548	-0.000489
6549	-0.000488
6550	-0.000456
6551	-0.000393
6552	-0.000319
6553	-0.000311
6554	-0.000352
6555	-0.000371
6556	-0.000395
6557	-0.00041
6558	-0.000412
6559	-0.000397
6560	-0.000383
6561	-0.000376
6562	-0.000357
6563	-0.000332
6564	-0.000327
6565	-0.000302
6566	-0.000352
6567	-0.000393
6568	-0.000393
6569	-0.000363
6570	-0.000362
6571	-0.000374
6572	-0.000383
6573	-0.000383
6574	-0.000381
6575	-0.000343
6576	-0.000339
6577	-0.000371
6578	-0.000358
6579	-0.00031
6580	-0.000338
6581	-0.000374
6582	-0.000406
6583	-0.000404
6584	-0.000395
6585	-0.00035
6586	-0.000361
6587	-0.000402
6588	-0.000348
6589	-0.000315
6590	-0.000355
6591	-0.000386
6592	-0.000382
6593	-0.000356
6594	-0.000389
6595	-0.000434
6596	-0.000411
6597	-0.000394
6598	-0.000408
6599	-0.000414
6600	-0.000436
6601	-0.000436
6602	-0.00043
6603	-0.000395
6604	-0.000393
6605	-0.000413
6606	-0.000402
6607	-0.000363
6608	-0.000378
6609	-0.000449
6610	-0.00048
6611	-0.000424
6612	-0.000392
6613	-0.000411
6614	-0.000453
6615	-0.000468
6616	-0.00046
6617	-0.000431
6618	-0.000427
6619	-0.000413
6620	-0.000406
6621	-0.000464
6622	-0.000497
6623	-0.000507
6624	-0.000451
6625	-0.00039
6626	-0.000441
6627	-0.000541
6628	-0.000556
6629	-0.000545
6630	-0.000566
6631	-0.00059
6632	-0.000605
6633	-0.000603
6634	-0.000567
6635	-0.000496
6636	-0.000495
6637	-0.000543
6638	-0.000544
6639	-0.000535
6640	-0.000521
6641	-0.000495
6642	-0.000517
6643	-0.000549
6644	-0.000582
6645	-0.000536
6646	-0.000473
6647	-0.000418
6648	-0.000417
6649	-0.000468
6650	-0.000475
6651	-0.00044
6652	-0.000438
6653	-0.000429
6654	-0.000426
6655	-0.000442
6656	-0.000486
6657	-0.000505
6658	-0.000498
6659	-0.000527
6660	-0.000542
6661	-0.000523
6662	-0.000458
6663	-0.000421
6664	-0.000398
6665	-0.000377
6666	-0.000396
6667	-0.000431
6668	-0.000457
6669	-0.000454
6670	-0.000482
6671	-0.000508
6672	-0.000489
6673	-0.000465
6674	-0.000491
6675	-0.000493
6676	-0.00047
6677	-0.000408
6678	-0.000388
6679	-0.000415
6680	-0.000475
6681	-0.000515
6682	-0.00052
6683	-0.000497
6684	-0.000477
6685	-0.000498
6686	-0.000499
6687	-0.000472
6688	-0.000487
6689	-0.000541
6690	-0.000574
6691	-0.000564
6692	-0.000561
6693	-0.00061
6694	-0.000644
6695	-0.000607
6696	-0.000619
6697	-0.000633
6698	-0.000625
6699	-0.000603
6700	-0.000603
6701	-0.000639
6702	-0.000651
6703	-0.000619
6704	-0.000569
6705	-0.000567
6706	-0.00059
6707	-0.000597
6708	-0.000555
6709	-0.00053
6710	-0.000518
6711	-0.00051
6712	-0.000501
6713	-0.000554
6714	-0.000594
6715	-0.000622
6716	-0.000642
6717	-0.000671
6718	-0.000745
6719	-0.00073
6720	-0.000691
6721	-0.000668
6722	-0.0007
6723	-0.000735
6724	-0.000761
6725	-0.00076
6726	-0.00078
6727	-0.000769
6728	-0.000765
6729	-0.000756
6730	-0.000736
6731	-0.000706
6732	-0.000714
6733	-0.000791
6734	-0.000793
6735	-0.000735
6736	-0.000716
6737	-0.00073
6738	-0.000756
6739	-0.000773
6740	-0.000766
6741	-0.000742
6742	-0.000716
6743	-0.000714
6744	-0.000731
6745	-0.000743
6746	-0.000776
6747	-0.000796
6748	-0.000801
6749	-0.000803
6750	-0.000771
6751	-0.000746
6752	-0.000763
6753	-0.000756
6754	-0.000737
6755	-0.000749
6756	-0.000756
6757	-0.000732
6758	-0.000724
6759	-0.000715
6760	-0.000696
6761	-0.000732
6762	-0.000754
6763	-0.000762
6764	-0.000773
6765	-0.000822
6766	-0.000812
6767	-0.000814
6768	-0.000815
6769	-0.000816
6770	-0.000852
6771	-0.000827
6772	-0.000788
6773	-0.000781
6774	-0.000826
6775	-0.000846
6776	-0.000822
6777	-0.00081
6778	-0.000814
6779	-0.000837
6780	-0.000849
6781	-0.000892
6782	-0.000952
6783	-0.000976
6784	-0.000966
6785	-0.000902
6786	-0.000848
6787	-0.000841
6788	-0.000839
6789	-0.000841
6790	-0.000819
6791	-0.000801
6792	-0.000838
6793	-0.000893
6794	-0.000928
6795	-0.00094
6796	-0.00095
6797	-0.000942
6798	-0.000938
6799	-0.000909
6800	-0.000891
6801	-0.000864
6802	-0.00086
6803	-0.00087
6804	-0.000889
6805	-0.00086
6806	-0.000827
6807	-0.000824
6808	-0.000833
6809	-0.000843
6810	-0.000856
6811	-0.000874
6812	-0.000824
6813	-0.000803
6814	-0.000847
6815	-0.000877
6816	-0.000894
6817	-0.000877
6818	-0.000844
6819	-0.000863
6820	-0.000892
6821	-0.000875
6822	-0.000845
6823	-0.000835
6824	-0.000867
6825	-0.000853
6826	-0.000886
6827	-0.00092
6828	-0.000948
6829	-0.00095
6830	-0.000926
6831	-0.000846
6832	-0.000814
6833	-0.000808
6834	-0.000834
6835	-0.000848
6836	-0.000871
6837	-0.00086
6838	-0.000821
6839	-0.00085
6840	-0.000878
6841	-0.000898
6842	-0.000866
6843	-0.000851
6844	-0.000863
6845	-0.000895
6846	-0.000872
6847	-0.000809
6848	-0.000756
6849	-0.000784
6850	-0.000854
6851	-0.000876
6852	-0.000871
6853	-0.000873
6854	-0.000885
6855	-0.000904
6856	-0.000944
6857	-0.000975
6858	-0.00094
6859	-0.000897
6860	-0.000898
6861	-0.000904
6862	-0.000922
6863	-0.000925
6864	-0.000915
6865	-0.00086
6866	-0.000805
6867	-0.000776
6868	-0.000759
6869	-0.000755
6870	-0.000753
6871	-0.000745
6872	-0.000718
6873	-0.00069
6874	-0.000697
6875	-0.000738
6876	-0.000807
6877	-0.000835
6878	-0.000798
6879	-0.000755
6880	-0.000763
6881	-0.00078
6882	-0.000793
6883	-0.00082
6884	-0.000814
6885	-0.000739
6886	-0.000698
6887	-0.000667
6888	-0.000712
6889	-0.000728
6890	-0.000694
6891	-0.00066
6892	-0.000648
6893	-0.000618
6894	-0.000616
6895	-0.000645
6896	-0.000663
6897	-0.000666
6898	-0.000726
6899	-0.000817
6900	-0.000851
6901	-0.000829
6902	-0.000825
6903	-0.000824
6904	-0.000819
6905	-0.000811
6906	-0.000793
6907	-0.000758
6908	-0.000723
6909	-0.000681
6910	-0.000591
6911	-0.000518
6912	-0.00051
6913	-0.000539
6914	-0.000607
6915	-0.000644
6916	-0.000656
6917	-0.000635
6918	-0.00064
6919	-0.000684
6920	-0.000693
6921	-0.000669
6922	-0.000693
6923	-0.000677
6924	-0.000632
6925	-0.000639
6926	-0.000642
6927	-0.000625
6928	-0.000643
6929	-0.000655
6930	-0.000677
6931	-0.000637
6932	-0.000629
6933	-0.00064
6934	-0.000654
6935	-0.000654
6936	-0.000666
6937	-0.00071
6938	-0.000718
6939	-0.000715
6940	-0.000694
6941	-0.000642
6942	-0.000643
6943	-0.000671
6944	-0.00067
6945	-0.000664
6946	-0.000649
6947	-0.00063
6948	-0.000622
6949	-0.000613
6950	-0.000607
6951	-0.000605
6952	-0.000613
6953	-0.00061
6954	-0.000606
6955	-0.000612
6956	-0.000654
6957	-0.000659
6958	-0.000645
6959	-0.000636
6960	-0.000663
6961	-0.000693
6962	-0.000687
6963	-0.000678
6964	-0.000723
6965	-0.000766
6966	-0.000793
6967	-0.000801
6968	-0.000788
6969	-0.000722
6970	-0.000683
6971	-0.000661
6972	-0.000644
6973	-0.000664
6974	-0.000689
6975	-0.000674
6976	-0.000674
6977	-0.000697
6978	-0.000687
6979	-0.000672
6980	-0.000691
6981	-0.000732
6982	-0.000726
6983	-0.000682
6984	-0.00063
6985	-0.000571
6986	-0.000513
6987	-0.000504
6988	-0.000511
6989	-0.000542
6990	-0.000565
6991	-0.00054
6992	-0.000534
6993	-0.000518
6994	-0.000505
6995	-0.000472
6996	-0.000475
6997	-0.000496
6998	-0.000505
6999	-0.000491
7000	-0.000486
7001	-0.000534
7002	-0.000567
7003	-0.000529
7004	-0.000471
7005	-0.000471
7006	-0.000441
7007	-0.00042
7008	-0.000408
7009	-0.000405
7010	-0.00042
7011	-0.000459
7012	-0.000454
7013	-0.00048
7014	-0.000509
7015	-0.000542
7016	-0.000557
7017	-0.000532
7018	-0.000508
7019	-0.000527
7020	-0.000556
7021	-0.000545
7022	-0.000513
7023	-0.000507
7024	-0.000509
7025	-0.000546
7026	-0.0006
7027	-0.000581
7028	-0.000499
7029	-0.000462
7030	-0.000505
7031	-0.000579
7032	-0.000589
7033	-0.000566
7034	-0.000517
7035	-0.000473
7036	-0.000463
7037	-0.000494
7038	-0.000532
7039	-0.000524
7040	-0.000536
7041	-0.000545
7042	-0.000513
7043	-0.000481
7044	-0.000512
7045	-0.00056
7046	-0.000644
7047	-0.000654
7048	-0.000625
7049	-0.000595
7050	-0.000566
7051	-0.000547
7052	-0.000542
7053	-0.000478
7054	-0.000467
7055	-0.000531
7056	-0.00057
7057	-0.000545
7058	-0.000547
7059	-0.000523
7060	-0.000501
7061	-0.000506
7062	-0.000525
7063	-0.000528
7064	-0.000515
7065	-0.000506
7066	-0.000509
7067	-0.000507
7068	-0.000484
7069	-0.000488
7070	-0.000535
7071	-0.000562
7072	-0.00053
7073	-0.000515
7074	-0.000532
7075	-0.000561
7076	-0.00055
7077	-0.000559
7078	-0.000568
7079	-0.000584
7080	-0.000575
7081	-0.000538
7082	-0.00051
7083	-0.0005
7084	-0.000509
7085	-0.000515
7086	-0.000522
7087	-0.000495
7088	-0.000459
7089	-0.000486
7090	-0.000537
7091	-0.000587
7092	-0.000614
7093	-0.000614
7094	-0.000592
7095	-0.000563
7096	-0.000568
7097	-0.000571
7098	-0.000552
7099	-0.000517
7100	-0.000517
7101	-0.000528
7102	-0.000508
7103	-0.000469
7104	-0.000457
7105	-0.000484
7106	-0.000486
7107	-0.000463
7108	-0.000474
7109	-0.00049
7110	-0.000512
7111	-0.000505
7112	-0.000452
7113	-0.00043
7114	-0.000423
7115	-0.000398
7116	-0.000417
7117	-0.00046
7118	-0.000503
7119	-0.000492
7120	-0.000485
7121	-0.000489
7122	-0.000503
7123	-0.000525
7124	-0.000544
7125	-0.000523
7126	-0.000456
7127	-0.000416
7128	-0.000426
7129	-0.000447
7130	-0.000455
7131	-0.000479
7132	-0.000469
7133	-0.000433
7134	-0.000403
7135	-0.000435
7136	-0.000494
7137	-0.000529
7138	-0.000539
7139	-0.000541
7140	-0.000549
7141	-0.000548
7142	-0.000561
7143	-0.000534
7144	-0.000491
7145	-0.00045
7146	-0.000433
7147	-0.000457
7148	-0.000501
7149	-0.000524
7150	-0.000516
7151	-0.000502
7152	-0.000501
7153	-0.000512
7154	-0.000543
7155	-0.00053
7156	-0.000516
7157	-0.0005
7158	-0.000518
7159	-0.000539
7160	-0.000537
7161	-0.000517
7162	-0.000491
7163	-0.00048
7164	-0.000473
7165	-0.000464
7166	-0.000459
7167	-0.000474
7168	-0.000457
7169	-0.000445
7170	-0.000445
7171	-0.000469
7172	-0.000488
7173	-0.000494
7174	-0.000494
7175	-0.000481
7176	-0.000483
7177	-0.000507
7178	-0.000521
7179	-0.000513
7180	-0.000479
7181	-0.000439
7182	-0.000409
7183	-0.000435
7184	-0.000435
7185	-0.000418
7186	-0.00044
7187	-0.000451
7188	-0.00047
7189	-0.000499
7190	-0.000525
7191	-0.000563
7192	-0.00057
7193	-0.000636
7194	-0.000662
7195	-0.000648
7196	-0.000599
7197	-0.000558
7198	-0.000546
7199	-0.000565
7200	-0.000574
7201	-0.000593
7202	-0.000602
7203	-0.000584
7204	-0.000544
7205	-0.000537
7206	-0.000544
7207	-0.000567
7208	-0.000594
7209	-0.000598
7210	-0.000611
7211	-0.000609
7212	-0.000571
7213	-0.000572
7214	-0.000583
7215	-0.000563
7216	-0.00055
7217	-0.000542
7218	-0.00049
7219	-0.000451
7220	-0.000454
7221	-0.000457
7222	-0.00048
7223	-0.000539
7224	-0.00057
7225	-0.000517
7226	-0.000487
7227	-0.000482
7228	-0.000507
7229	-0.000557
7230	-0.000546
7231	-0.000495
7232	-0.000493
7233	-0.00052
7234	-0.000523
7235	-0.000555
7236	-0.000576
7237	-0.00058
7238	-0.000559
7239	-0.000547
7240	-0.000517
7241	-0.000476
7242	-0.000472
7243	-0.000506
7244	-0.000552
7245	-0.000555
7246	-0.000604
7247	-0.000624
7248	-0.000605
7249	-0.000564
7250	-0.00053
7251	-0.00047
7252	-0.000413
7253	-0.000412
7254	-0.000408
7255	-0.000452
7256	-0.000519
7257	-0.000545
7258	-0.000537
7259	-0.000529
7260	-0.000527
7261	-0.000538
7262	-0.000533
7263	-0.000475
7264	-0.00042
7265	-0.000438
7266	-0.000481
7267	-0.000495
7268	-0.000461
7269	-0.00041
7270	-0.000414
7271	-0.000467
7272	-0.00048
7273	-0.000483
7274	-0.000464
7275	-0.000471
7276	-0.000469
7277	-0.0004
7278	-0.000388
7279	-0.000427
7280	-0.000484
7281	-0.000532
7282	-0.000548
7283	-0.000537
7284	-0.00052
7285	-0.00047
7286	-0.00042
7287	-0.000429
7288	-0.000431
7289	-0.000481
7290	-0.000511
7291	-0.000503
7292	-0.00049
7293	-0.000468
7294	-0.00045
7295	-0.000392
7296	-0.000378
7297	-0.000362
7298	-0.00035
7299	-0.000344
7300	-0.000366
7301	-0.000368
7302	-0.00037
7303	-0.000385
7304	-0.000371
7305	-0.000407
7306	-0.000398
7307	-0.000375
7308	-0.00038
7309	-0.00039
7310	-0.000378
7311	-0.000336
7312	-0.00032
7313	-0.000274
7314	-0.00023
7315	-0.000258
7316	-0.000245
7317	-0.000235
7318	-0.000264
7319	-0.000342
7320	-0.000391
7321	-0.000372
7322	-0.000359
7323	-0.000402
7324	-0.000464
7325	-0.000443
7326	-0.000435
7327	-0.00041
7328	-0.000402
7329	-0.000424
7330	-0.000447
7331	-0.000434
7332	-0.000398
7333	-0.000391
7334	-0.00039
7335	-0.000377
7336	-0.000353
7337	-0.000335
7338	-0.000319
7339	-0.000315
7340	-0.000346
7341	-0.000368
7342	-0.000361
7343	-0.000362
7344	-0.000378
7345	-0.000396
7346	-0.000356
7347	-0.000319
7348	-0.000308
7349	-0.000345
7350	-0.0004
7351	-0.000462
7352	-0.000463
7353	-0.000425
7354	-0.000405
7355	-0.000392
7356	-0.000378
7357	-0.000383
7358	-0.000379
7359	-0.000374
7360	-0.000388
7361	-0.000403
7362	-0.000362
7363	-0.000353
7364	-0.000402
7365	-0.000447
7366	-0.000464
7367	-0.00043
7368	-0.000346
7369	-0.00028
7370	-0.000283
7371	-0.000271
7372	-0.00028
7373	-0.000251
7374	-0.000259
7375	-0.000286
7376	-0.000324
7377	-0.000345
7378	-0.000356
7379	-0.000364
7380	-0.000385
7381	-0.000388
7382	-0.000382
7383	-0.000368
7384	-0.000371
7385	-0.000347
7386	-0.000341
7387	-0.000369
7388	-0.000371
7389	-0.00035
7390	-0.000336
7391	-0.000311
7392	-0.000278
7393	-0.000293
7394	-0.000341
7395	-0.000354
7396	-0.000368
7397	-0.000392
7398	-0.000411
7399	-0.000415
7400	-0.000408
7401	-0.000439
7402	-0.000473
7403	-0.000448
7404	-0.000414
7405	-0.000404
7406	-0.000419
7407	-0.000465
7408	-0.000468
7409	-0.00046
7410	-0.000496
7411	-0.000529
7412	-0.000494
7413	-0.000445
7414	-0.000439
7415	-0.000446
7416	-0.00045
7417	-0.000492
7418	-0.000487
7419	-0.000451
7420	-0.000438
7421	-0.00043
7422	-0.000399
7423	-0.000392
7424	-0.000414
7425	-0.000445
7426	-0.000465
7427	-0.000478
7428	-0.00045
7429	-0.000414
7430	-0.00035
7431	-0.000356
7432	-0.000353
7433	-0.000353
7434	-0.000338
7435	-0.000361
7436	-0.000387
7437	-0.000378
7438	-0.000347
7439	-0.000312
7440	-0.000256
7441	-0.000256
7442	-0.000295
7443	-0.000349
7444	-0.000355
7445	-0.000353
7446	-0.000378
7447	-0.000402
7448	-0.000407
7449	-0.000397
7450	-0.000374
7451	-0.000363
7452	-0.000366
7453	-0.000337
7454	-0.000273
7455	-0.00023
7456	-0.000252
7457	-0.000277
7458	-0.000286
7459	-0.000277
7460	-0.000246
7461	-0.000217
7462	-0.000216
7463	-0.000189
7464	-0.000177
7465	-0.000219
7466	-0.000235
7467	-0.000198
7468	-0.000193
7469	-0.000149
7470	-8.4e-05
7471	-4.6e-05
7472	-0.000103
7473	-0.000177
7474	-0.000169
7475	-0.000168
7476	-0.000179
7477	-0.000171
7478	-0.000167
7479	-0.000142
7480	-0.000146
7481	-0.000167
7482	-0.000164
7483	-0.00018
7484	-0.000189
7485	-0.000159
7486	-0.000137
7487	-0.000152
7488	-0.000163
7489	-0.000162
7490	-0.000164
7491	-0.000193
7492	-0.000224
7493	-0.000248
7494	-0.000247
7495	-0.000274
7496	-0.000268
7497	-0.000231
7498	-0.000214
7499	-0.000231
7500	-0.000256
7501	-0.000286
7502	-0.000242
7503	-0.00018
7504	-0.000183
7505	-0.000242
7506	-0.000306
7507	-0.000382
7508	-0.000432
7509	-0.000419
7510	-0.000377
7511	-0.000378
7512	-0.000377
7513	-0.000384
7514	-0.000325
7515	-0.000229
7516	-0.000171
7517	-0.000166
7518	-0.000155
7519	-0.000118
7520	-0.000109
7521	-0.000154
7522	-0.000228
7523	-0.000278
7524	-0.000308
7525	-0.000284
7526	-0.000316
7527	-0.000338
7528	-0.000344
7529	-0.00034
7530	-0.000318
7531	-0.000278
7532	-0.000253
7533	-0.000226
7534	-0.000226
7535	-0.000211
7536	-0.000191
7537	-0.000195
7538	-0.000212
7539	-0.000227
7540	-0.000185
7541	-0.000151
7542	-0.000179
7543	-0.000206
7544	-0.000196
7545	-0.000189
7546	-0.00018
7547	-0.000217
7548	-0.000253
7549	-0.000237
7550	-0.000206
7551	-0.00017
7552	-0.000165
7553	-0.000193
7554	-0.000195
7555	-0.000175
7556	-0.000187
7557	-0.000189
7558	-0.000177
7559	-0.000144
7560	-0.000116
7561	-0.00012
7562	-0.000129
7563	-9.1e-05
7564	-6.5e-05
7565	-7e-05
7566	-0.0001
7567	-9.8e-05
7568	-7.7e-05
7569	-7.2e-05
7570	-3.3e-05
7571	-1.2e-05
7572	-4.2e-05
7573	-9.2e-05
7574	-0.000141
7575	-0.000155
7576	-0.000213
7577	-0.000279
7578	-0.000292
7579	-0.000286
7580	-0.000233
7581	-0.000181
7582	-0.000175
7583	-0.000143
7584	-0.000122
7585	-0.000112
7586	-0.000107
7587	-8.1e-05
7588	-5.2e-05
7589	-2.9e-05
7590	-2.6e-05
7591	-4.9e-05
7592	-7e-05
7593	-7.3e-05
7594	-8.7e-05
7595	-0.000142
7596	-0.000157
7597	-0.000116
7598	-9.4e-05
7599	-0.000123
7600	-0.000156
7601	-0.000188
7602	-0.000186
7603	-0.000192
7604	-0.000197
7605	-0.000219
7606	-0.000228
7607	-0.000194
7608	-0.000148
7609	-0.000124
7610	-0.000129
7611	-0.000143
7612	-0.000109
7613	-0.000106
7614	-0.000101
7615	-0.000104
7616	-0.000136
7617	-0.000219
7618	-0.000208
7619	-0.000204
7620	-0.000202
7621	-0.000204
7622	-0.000222
7623	-0.000248
7624	-0.000252
7625	-0.000249
7626	-0.000285
7627	-0.0003
7628	-0.00028
7629	-0.000266
7630	-0.000262
7631	-0.000299
7632	-0.000323
7633	-0.000285
7634	-0.000254
7635	-0.000267
7636	-0.000265
7637	-0.000223
7638	-0.000232
7639	-0.000279
7640	-0.00032
7641	-0.000301
7642	-0.000308
7643	-0.000352
7644	-0.000353
7645	-0.00033
7646	-0.000272
7647	-0.000217
7648	-0.000203
7649	-0.000171
7650	-0.000154
7651	-0.000172
7652	-0.000229
7653	-0.000258
7654	-0.000296
7655	-0.000326
7656	-0.000349
7657	-0.00033
7658	-0.000313
7659	-0.000284
7660	-0.000235
7661	-0.00023
7662	-0.000258
7663	-0.000267
7664	-0.000241
7665	-0.000207
7666	-0.000255
7667	-0.000301
7668	-0.000309
7669	-0.000287
7670	-0.000308
7671	-0.000319
7672	-0.000319
7673	-0.00031
7674	-0.000377
7675	-0.000399
7676	-0.000364
7677	-0.000286
7678	-0.000217
7679	-0.000229
7680	-0.000298
7681	-0.00035
7682	-0.000353
7683	-0.000312
7684	-0.000283
7685	-0.000308
7686	-0.000334
7687	-0.00033
7688	-0.000297
7689	-0.000275
7690	-0.000314
7691	-0.000392
7692	-0.000472
7693	-0.000458
7694	-0.000393
7695	-0.000362
7696	-0.00033
7697	-0.000338
7698	-0.000328
7699	-0.000319
7700	-0.00031
7701	-0.000335
7702	-0.000336
7703	-0.00037
7704	-0.000406
7705	-0.000395
7706	-0.000359
7707	-0.000358
7708	-0.000326
7709	-0.00031
7710	-0.000317
7711	-0.000331
7712	-0.000365
7713	-0.000391
7714	-0.000416
7715	-0.000431
7716	-0.000442
7717	-0.000442
7718	-0.000452
7719	-0.000461
7720	-0.00047
7721	-0.000474
7722	-0.000468
7723	-0.000457
7724	-0.000453
7725	-0.000461
7726	-0.000446
7727	-0.000437
7728	-0.000429
7729	-0.00041
7730	-0.000372
7731	-0.000372
7732	-0.000386
7733	-0.000423
7734	-0.000404
7735	-0.000353
7736	-0.000371
7737	-0.000373
7738	-0.000319
7739	-0.000261
7740	-0.000261
7741	-0.000247
7742	-0.000226
7743	-0.000205
7744	-0.0002
7745	-0.000189
7746	-0.000196
7747	-0.0002
7748	-0.000211
7749	-0.000234
7750	-0.000236
7751	-0.000219
7752	-0.000192
7753	-0.000168
7754	-0.00018
7755	-0.000193
7756	-0.00022
7757	-0.000255
7758	-0.00026
7759	-0.000252
7760	-0.000242
7761	-0.000305
7762	-0.000356
7763	-0.000372
7764	-0.000319
7765	-0.000282
7766	-0.000274
7767	-0.000259
7768	-0.000234
7769	-0.000203
7770	-0.000206
7771	-0.000184
7772	-0.000171
7773	-0.000145
7774	-0.000149
7775	-0.000172
7776	-0.000174
7777	-0.000224
7778	-0.000211
7779	-0.000194
7780	-0.000202
7781	-0.000235
7782	-0.000245
7783	-0.000229
7784	-0.000221
7785	-0.000224
7786	-0.000189
7787	-0.000191
7788	-0.000169
7789	-0.000149
7790	-0.000132
7791	-0.000134
7792	-0.000133
7793	-0.000134
7794	-0.000142
7795	-0.000169
7796	-0.000137
7797	-0.00014
7798	-0.000177
7799	-0.000215
7800	-0.000203
7801	-0.000172
7802	-0.000135
7803	-0.000121
7804	-0.000141
7805	-0.000179
7806	-0.00019
7807	-0.000192
7808	-0.000186
7809	-0.000244
7810	-0.000295
7811	-0.000288
7812	-0.000238
7813	-0.000224
7814	-0.000201
7815	-0.00017
7816	-0.000139
7817	-0.000131
7818	-0.000151
7819	-0.000173
7820	-0.000154
7821	-0.000161
7822	-0.000136
7823	-0.000129
7824	-0.000152
7825	-0.000178
7826	-0.000213
7827	-0.000241
7828	-0.000222
7829	-0.000206
7830	-0.000187
7831	-0.000158
7832	-0.000155
7833	-0.000167
7834	-0.00016
7835	-0.00015
7836	-0.000153
7837	-0.000217
7838	-0.000248
7839	-0.000255
7840	-0.000288
7841	-0.000321
7842	-0.000288
7843	-0.000216
7844	-0.000203
7845	-0.00024
7846	-0.00024
7847	-0.000218
7848	-0.000209
7849	-0.000227
7850	-0.000234
7851	-0.000218
7852	-0.000222
7853	-0.000254
7854	-0.000239
7855	-0.000211
7856	-0.000223
7857	-0.000221
7858	-0.000207
7859	-0.000182
7860	-0.000192
7861	-0.000228
7862	-0.00026
7863	-0.000279
7864	-0.000245
7865	-0.000223
7866	-0.00021
7867	-0.000211
7868	-0.000207
7869	-0.000197
7870	-0.000212
7871	-0.000224
7872	-0.000225
7873	-0.000221
7874	-0.000237
7875	-0.000245
7876	-0.000262
7877	-0.000252
7878	-0.000267
7879	-0.000258
7880	-0.000246
7881	-0.000215
7882	-0.000173
7883	-0.000172
7884	-0.000233
7885	-0.000308
7886	-0.000347
7887	-0.000373
7888	-0.000361
7889	-0.00036
7890	-0.000354
7891	-0.000384
7892	-0.00038
7893	-0.000349
7894	-0.000298
7895	-0.000258
7896	-0.000232
7897	-0.000202
7898	-0.000159
7899	-0.000126
7900	-0.000114
7901	-9.8e-05
7902	-0.000107
7903	-0.000123
7904	-0.000161
7905	-0.000196
7906	-0.000187
7907	-0.000179
7908	-0.000209
7909	-0.000245
7910	-0.000278
7911	-0.000305
7912	-0.000358
7913	-0.000366
7914	-0.000359
7915	-0.000344
7916	-0.000323
7917	-0.000279
7918	-0.000246
7919	-0.000231
7920	-0.000278
7921	-0.00032
7922	-0.000348
7923	-0.00035
7924	-0.000322
7925	-0.000295
7926	-0.000298
7927	-0.000317
7928	-0.000318
7929	-0.000315
7930	-0.000365
7931	-0.000422
7932	-0.000438
7933	-0.000438
7934	-0.000441
7935	-0.000451
7936	-0.000439
7937	-0.000397
7938	-0.000336
7939	-0.000319
7940	-0.000318
7941	-0.000332
7942	-0.000343
7943	-0.000361
7944	-0.000337
7945	-0.000303
7946	-0.00028
7947	-0.000252
7948	-0.000241
7949	-0.00027
7950	-0.000276
7951	-0.000287
7952	-0.000257
7953	-0.000251
7954	-0.000248
7955	-0.00025
7956	-0.000245
7957	-0.000248
7958	-0.000272
7959	-0.000312
7960	-0.000302
7961	-0.000241
7962	-0.0002
7963	-0.000213
7964	-0.000216
7965	-0.000205
7966	-0.00023
7967	-0.000282
7968	-0.000308
7969	-0.00031
7970	-0.000336
7971	-0.000335
7972	-0.000337
7973	-0.000341
7974	-0.000356
7975	-0.000367
7976	-0.000344
7977	-0.000331
7978	-0.000331
7979	-0.000336
7980	-0.000337
7981	-0.000314
7982	-0.000306
7983	-0.000308
7984	-0.000291
7985	-0.000279
7986	-0.000279
7987	-0.000314
7988	-0.000341
7989	-0.000329
7990	-0.000336
7991	-0.000335
7992	-0.000334
7993	-0.000358
7994	-0.000399
7995	-0.000391
7996	-0.000371
7997	-0.000405
7998	-0.000436
[truncated: 3,401 more rows]

## Sheet: P395dC
Time	UV
6000	-0.000911
6001	-0.000906
6002	-0.000932
6003	-0.000942
6004	-0.000916
6005	-0.000922
6006	-0.000919
6007	-0.000915
6008	-0.000911
6009	-0.000932
6010	-0.000939
6011	-0.000954
6012	-0.000984
6013	-0.000968
6014	-0.000969
6015	-0.001003
6016	-0.001008
6017	-0.000984
6018	-0.000972
6019	-0.000945
6020	-0.000941
6021	-0.000954
6022	-0.000956
6023	-0.00097
6024	-0.000985
6025	-0.000962
6026	-0.000934
6027	-0.000924
6028	-0.00089
6029	-0.000871
6030	-0.000877
6031	-0.000885
6032	-0.000851
6033	-0.000877
6034	-0.00089
6035	-0.000882
6036	-0.000869
6037	-0.000869
6038	-0.00084
6039	-0.000862
6040	-0.000856
6041	-0.000847
6042	-0.000872
6043	-0.000917
6044	-0.000935
6045	-0.000929
6046	-0.000935
6047	-0.000955
6048	-0.00098
6049	-0.001029
6050	-0.001077
6051	-0.001083
6052	-0.001054
6053	-0.001072
6054	-0.001079
6055	-0.001091
6056	-0.001067
6057	-0.001061
6058	-0.00104
6059	-0.001019
6060	-0.00099
6061	-0.00099
6062	-0.001037
6063	-0.001037
6064	-0.00102
6065	-0.00102
6066	-0.001069
6067	-0.001074
6068	-0.001046
6069	-0.001009
6070	-0.001023
6071	-0.001043
6072	-0.001007
6073	-0.000975
6074	-0.000973
6075	-0.00096
6076	-0.00097
6077	-0.000978
6078	-0.000971
6079	-0.000956
6080	-0.000962
6081	-0.000975
6082	-0.001031
6083	-0.001074
6084	-0.001093
6085	-0.001103
6086	-0.001079
6087	-0.001061
6088	-0.001021
6089	-0.001017
6090	-0.001002
6091	-0.00096
6092	-0.00095
6093	-0.000953
6094	-0.00093
6095	-0.000872
6096	-0.000892
6097	-0.000924
6098	-0.000915
6099	-0.000848
6100	-0.000794
6101	-0.000764
6102	-0.00076
6103	-0.000736
6104	-0.000749
6105	-0.000759
6106	-0.000777
6107	-0.000784
6108	-0.000823
6109	-0.000836
6110	-0.000853
6111	-0.000838
6112	-0.000838
6113	-0.000791
6114	-0.000757
6115	-0.000754
6116	-0.000758
6117	-0.00079
6118	-0.000796
6119	-0.000799
6120	-0.000758
6121	-0.000709
6122	-0.000683
6123	-0.000713
6124	-0.000734
6125	-0.000748
6126	-0.000708
6127	-0.000696
6128	-0.000702
6129	-0.000695
6130	-0.000715
6131	-0.000758
6132	-0.00077
6133	-0.000756
6134	-0.000709
6135	-0.000692
6136	-0.000724
6137	-0.000761
6138	-0.000791
6139	-0.000787
6140	-0.000784
6141	-0.000795
6142	-0.0008
6143	-0.000802
6144	-0.000811
6145	-0.00084
6146	-0.000843
6147	-0.000819
6148	-0.000827
6149	-0.000833
6150	-0.000838
6151	-0.000861
6152	-0.000889
6153	-0.000888
6154	-0.000885
6155	-0.000901
6156	-0.000889
6157	-0.000902
6158	-0.000918
6159	-0.000904
6160	-0.00089
6161	-0.000868
6162	-0.000865
6163	-0.000851
6164	-0.000838
6165	-0.000805
6166	-0.000805
6167	-0.000798
6168	-0.000799
6169	-0.000762
6170	-0.000767
6171	-0.000809
6172	-0.00083
6173	-0.000818
6174	-0.000801
6175	-0.000809
6176	-0.000818
6177	-0.000814
6178	-0.000806
6179	-0.000813
6180	-0.000826
6181	-0.000836
6182	-0.000825
6183	-0.00084
6184	-0.000853
6185	-0.000863
6186	-0.000826
6187	-0.000797
6188	-0.000817
6189	-0.00083
6190	-0.000829
6191	-0.00084
6192	-0.00085
6193	-0.000856
6194	-0.00086
6195	-0.00085
6196	-0.000832
6197	-0.000845
6198	-0.00088
6199	-0.000898
6200	-0.000898
6201	-0.000861
6202	-0.000841
6203	-0.000844
6204	-0.000866
6205	-0.000882
6206	-0.000898
6207	-0.000899
6208	-0.000904
6209	-0.000899
6210	-0.000905
6211	-0.000921
6212	-0.000901
6213	-0.000857
6214	-0.000866
6215	-0.00087
6216	-0.00086
6217	-0.000876
6218	-0.000933
6219	-0.00096
6220	-0.000908
6221	-0.00087
6222	-0.000893
6223	-0.000887
6224	-0.000874
6225	-0.000851
6226	-0.000843
6227	-0.000829
6228	-0.000793
6229	-0.000775
6230	-0.000769
6231	-0.000818
6232	-0.000885
6233	-0.000897
6234	-0.000854
6235	-0.000839
6236	-0.000839
6237	-0.000854
6238	-0.000874
6239	0
6240	2e-05
6241	6.3e-05
6242	0.000144
6243	0.000161
6244	0.000197
6245	0.000187
6246	0.000145
6247	9.6e-05
6248	6e-05
6249	4.9e-05
6250	7.5e-05
6251	9.3e-05
6252	9.5e-05
6253	0.000108
6254	0.000103
6255	5.6e-05
6256	7.7e-05
6257	7.2e-05
6258	7.2e-05
6259	8.6e-05
6260	8.6e-05
6261	9.6e-05
6262	0.000124
6263	0.000136
6264	0.000114
6265	8.2e-05
6266	0.000101
6267	0.00011
6268	0.000102
6269	0.000104
6270	0.000143
6271	0.000183
6272	0.000167
6273	0.000125
6274	0.000112
6275	0.000126
6276	0.000115
6277	8.6e-05
6278	7.7e-05
6279	0.000106
6280	0.000132
6281	0.000124
6282	9.9e-05
6283	7.5e-05
6284	5.4e-05
6285	4.7e-05
6286	8.2e-05
6287	9e-05
6288	5.8e-05
6289	7e-06
6290	-6e-06
6291	6e-06
6292	-3e-06
6293	-2.5e-05
6294	-2.5e-05
6295	-3.3e-05
6296	-3.9e-05
6297	-1.3e-05
6298	2.6e-05
6299	4.4e-05
6300	2.9e-05
6301	3.3e-05
6302	4.3e-05
6303	6.6e-05
6304	5.5e-05
6305	4e-05
6306	2.5e-05
6307	7e-06
6308	-3e-05
6309	-0.000113
6310	-0.000164
6311	-0.000186
6312	-0.000166
6313	-0.000126
6314	-0.000101
6315	-8.2e-05
6316	-6.6e-05
6317	-9.4e-05
6318	-7.1e-05
6319	-1.3e-05
6320	7e-06
6321	1.9e-05
6322	8e-06
6323	3e-06
6324	6e-06
6325	6e-06
6326	3e-05
6327	5.5e-05
6328	0.000127
6329	0.000153
6330	0.000157
6331	0.000171
6332	0.000145
6333	0.000126
6334	0.000117
6335	9.2e-05
6336	5.6e-05
6337	4.3e-05
6338	7.8e-05
6339	7.9e-05
6340	7.6e-05
6341	6.7e-05
6342	6.7e-05
6343	3.7e-05
6344	1.3e-05
6345	5.6e-05
6346	6.5e-05
6347	4.8e-05
6348	3.7e-05
6349	6.1e-05
6350	0.000112
6351	0.00013
6352	0.000114
6353	8.4e-05
6354	4.8e-05
6355	5.8e-05
6356	8.6e-05
6357	8.8e-05
6358	6.7e-05
6359	6.8e-05
6360	0.000108
6361	0.000134
6362	0.000143
6363	0.00014
6364	0.000122
6365	0.000104
6366	0.000109
6367	0.000128
6368	0.000124
6369	0.000111
6370	6.4e-05
6371	4e-05
6372	4.6e-05
6373	3.1e-05
6374	-2.3e-05
6375	-4.1e-05
6376	-3e-05
6377	-6.1e-05
6378	-7.4e-05
6379	-7.5e-05
6380	-7.1e-05
6381	-7.2e-05
6382	-9.9e-05
6383	-0.000122
6384	-0.000125
6385	-0.000102
6386	-3.7e-05
6387	2e-05
6388	1.2e-05
6389	0
6390	-6e-06
6391	6e-06
6392	-8e-06
6393	-1.3e-05
6394	4e-06
6395	1.2e-05
6396	5e-06
6397	-1.8e-05
6398	-2.6e-05
6399	-3.9e-05
6400	-3.1e-05
6401	-3.3e-05
6402	-9e-06
6403	8e-06
6404	1.6e-05
6405	2.8e-05
6406	6.2e-05
6407	5.7e-05
6408	6.9e-05
6409	5.8e-05
6410	3.2e-05
6411	-1e-05
6412	-1.6e-05
6413	2.5e-05
6414	5e-05
6415	5e-05
6416	3.5e-05
6417	9e-06
6418	-8e-06
6419	-1.4e-05
6420	6e-06
6421	1.2e-05
6422	-1.1e-05
6423	-2.7e-05
6424	-2.1e-05
6425	-1e-06
6426	3e-06
6427	-1.8e-05
6428	-2.7e-05
6429	-3e-06
6430	-1.2e-05
6431	-3.3e-05
6432	-3.2e-05
6433	-3e-06
6434	-2e-06
6435	1.3e-05
6436	2.2e-05
6437	6.4e-05
6438	0.000111
6439	0.00015
6440	0.000148
6441	0.00015
6442	0.000138
6443	9.5e-05
6444	8.7e-05
6445	9.8e-05
6446	0.000102
6447	8.9e-05
6448	6.5e-05
6449	3.4e-05
6450	-7e-06
6451	-6e-06
6452	2.1e-05
6453	5e-05
6454	6.6e-05
6455	3.8e-05
6456	4.2e-05
6457	2.9e-05
6458	3.7e-05
6459	5.6e-05
6460	8.5e-05
6461	0.000107
6462	0.000128
6463	0.000133
6464	0.00016
6465	0.000174
6466	0.000156
6467	9e-05
6468	3.9e-05
6469	4e-05
6470	4.7e-05
6471	3.7e-05
6472	4.1e-05
6473	4.3e-05
6474	1.4e-05
6475	-2.1e-05
6476	-1.9e-05
6477	3.2e-05
6478	4.7e-05
6479	6.2e-05
6480	6.1e-05
6481	7.2e-05
6482	5.3e-05
6483	3.2e-05
6484	3.9e-05
6485	4.1e-05
6486	3.9e-05
6487	1.2e-05
6488	-3.5e-05
6489	-4.1e-05
6490	-3.2e-05
6491	-3.4e-05
6492	-2.9e-05
6493	-2.7e-05
6494	-1.9e-05
6495	-2e-05
6496	-2.8e-05
6497	-1.9e-05
6498	-3.6e-05
6499	-1.5e-05
6500	3.2e-05
6501	4.2e-05
6502	5e-05
6503	2.2e-05
6504	-8e-06
6505	-4e-05
6506	-4.8e-05
6507	-2.7e-05
6508	-8e-06
6509	-6e-06
6510	4e-06
6511	3e-06
6512	-6e-06
6513	-9e-06
6514	-9e-06
6515	-4e-06
6516	-2e-05
6517	-2e-05
6518	-3.4e-05
6519	-1.4e-05
6520	3.4e-05
6521	4.6e-05
6522	9e-06
6523	-8e-06
6524	0
6525	2.5e-05
6526	3.7e-05
6527	8.9e-05
6528	0.000135
6529	0.000139
6530	9.3e-05
6531	5e-05
6532	2.4e-05
6533	2.2e-05
6534	3.1e-05
6535	4e-05
6536	-1e-06
6537	-4.2e-05
6538	-6e-05
6539	-6.2e-05
6540	-5e-05
6541	-4.2e-05
6542	-3.2e-05
6543	-1.3e-05
6544	-4e-06
6545	7e-06
6546	2.1e-05
6547	3.5e-05
6548	3.7e-05
6549	5.3e-05
6550	4.7e-05
6551	3.5e-05
6552	4.7e-05
6553	5.2e-05
6554	4.5e-05
6555	4.5e-05
6556	2.2e-05
6557	3.1e-05
6558	5.1e-05
6559	6.4e-05
6560	3.7e-05
6561	3.8e-05
6562	3e-05
6563	2.7e-05
6564	2.7e-05
6565	2.4e-05
6566	3.6e-05
6567	2.6e-05
6568	-1.7e-05
6569	-3e-05
6570	-2.5e-05
6571	-4.1e-05
6572	-6.6e-05
6573	-5.9e-05
6574	-6.2e-05
6575	-8.9e-05
6576	-0.000102
6577	-0.000119
6578	-0.000109
6579	-7.6e-05
6580	-3.9e-05
6581	-3.6e-05
6582	-6.3e-05
6583	-0.000121
6584	-0.000158
6585	-0.00012
6586	-7.2e-05
6587	-3.7e-05
6588	-2.4e-05
6589	-4.7e-05
6590	-7.9e-05
6591	-8.7e-05
6592	-6.4e-05
6593	-3.6e-05
6594	-2.5e-05
6595	-6.1e-05
6596	-4.2e-05
6597	3e-05
6598	4.7e-05
6599	-1e-06
6600	-1.3e-05
6601	-1.5e-05
6602	-4e-05
6603	-5.9e-05
6604	-4.8e-05
6605	-1.3e-05
6606	1.9e-05
6607	3.5e-05
6608	9e-06
6609	2.8e-05
6610	1.9e-05
6611	1.8e-05
6612	2.9e-05
6613	4.6e-05
6614	4.9e-05
6615	4e-05
6616	3.5e-05
6617	3.5e-05
6618	1e-06
6619	-2.5e-05
6620	-3.6e-05
6621	-2.9e-05
6622	-6.2e-05
6623	-8.6e-05
6624	-8.1e-05
6625	-5e-05
6626	-5e-05
6627	-7e-05
6628	-6.1e-05
6629	-6.6e-05
6630	-7.3e-05
6631	-0.000119
6632	-0.00016
6633	-0.00016
6634	-0.000126
6635	-8.6e-05
6636	-5.6e-05
6637	-3.4e-05
6638	-1.1e-05
6639	-1.4e-05
6640	-1e-06
6641	1e-06
6642	-2e-05
6643	-4e-06
6644	-6e-06
6645	-7e-06
6646	2.6e-05
6647	2.1e-05
6648	2.4e-05
6649	4e-05
6650	4.4e-05
6651	2e-06
6652	-4.1e-05
6653	-6.9e-05
6654	-4.5e-05
6655	1.6e-05
6656	2.8e-05
6657	5.2e-05
6658	4e-05
6659	6.8e-05
6660	3.7e-05
6661	4.2e-05
6662	3.4e-05
6663	1.2e-05
6664	1.9e-05
6665	3.5e-05
6666	4e-05
6667	6e-06
6668	-9e-06
6669	-5e-06
6670	2.3e-05
6671	1.5e-05
6672	1e-05
6673	1.6e-05
6674	3.5e-05
6675	3.7e-05
6676	4.7e-05
6677	2.1e-05
6678	-4e-06
6679	2.9e-05
6680	1.6e-05
6681	-9e-06
6682	-2.8e-05
6683	-2.5e-05
6684	-4.3e-05
6685	-7.1e-05
6686	-9.9e-05
6687	-0.000118
6688	-0.000149
6689	-0.000158
6690	-0.000142
6691	-0.000114
6692	-0.000123
6693	-0.00016
6694	-0.000175
6695	-0.000138
6696	-0.00011
6697	-0.000122
6698	-0.000111
6699	-0.000135
6700	-0.000163
6701	-0.000156
6702	-0.000181
6703	-0.000185
6704	-0.000178
6705	-0.00018
6706	-0.000182
6707	-0.000205
6708	-0.000219
6709	-0.00022
6710	-0.000228
6711	-0.000209
6712	-0.000179
6713	-0.000172
6714	-0.000132
6715	-0.000107
6716	-0.000134
6717	-0.000199
6718	-0.000218
6719	-0.000205
6720	-0.00018
6721	-0.000182
6722	-0.000168
6723	-0.000122
6724	-0.000109
6725	-0.000132
6726	-0.000111
6727	-8.9e-05
6728	-9.3e-05
6729	-9.6e-05
6730	-7.8e-05
6731	-7.1e-05
6732	-4.4e-05
6733	5e-06
6734	-1.3e-05
6735	-0.000103
6736	-0.000145
6737	-0.000127
6738	-9.7e-05
6739	-8.8e-05
6740	-9.8e-05
6741	-0.000132
6742	-0.000162
6743	-0.000128
6744	-0.000109
6745	-0.000102
6746	-0.00014
6747	-0.000158
6748	-0.000174
6749	-0.00018
6750	-0.000187
6751	-0.00017
6752	-0.000196
6753	-0.000254
6754	-0.000281
6755	-0.000276
6756	-0.000271
6757	-0.000267
6758	-0.000261
6759	-0.000251
6760	-0.000183
6761	-0.000141
6762	-0.000128
6763	-0.000117
6764	-0.000138
6765	-0.000174
6766	-0.000203
6767	-0.000211
6768	-0.000197
6769	-0.000191
6770	-0.000205
6771	-0.000184
6772	-0.00014
6773	-0.000109
6774	-0.000108
6775	-0.000102
6776	-0.00012
6777	-0.000129
6778	-0.000106
6779	-7.9e-05
6780	-5e-05
6781	-2e-05
6782	-2.4e-05
6783	-3.3e-05
6784	-5.7e-05
6785	-9.2e-05
6786	-0.000125
6787	-0.00015
6788	-0.00014
6789	-0.000139
6790	-0.000115
6791	-4.7e-05
6792	-2.8e-05
6793	-2.5e-05
6794	-3.8e-05
6795	-3.9e-05
6796	-3.8e-05
6797	-3.5e-05
6798	-6.2e-05
6799	-7.3e-05
6800	-9e-05
6801	-0.000109
6802	-9.7e-05
6803	-6.5e-05
6804	-8e-05
6805	-7.8e-05
6806	-5.5e-05
6807	-7.8e-05
6808	-0.000119
6809	-9.9e-05
6810	-8.2e-05
6811	-7.4e-05
6812	-6.3e-05
6813	-2.6e-05
6814	-1.9e-05
6815	8e-06
6816	5.2e-05
6817	6.9e-05
6818	6.2e-05
6819	2.6e-05
6820	-1.8e-05
6821	-7.7e-05
6822	-0.000105
6823	-8.1e-05
6824	-5.2e-05
6825	-5.9e-05
6826	-0.000102
6827	-0.00013
6828	-9.8e-05
6829	-8.1e-05
6830	-8e-05
6831	-7.1e-05
6832	-3.8e-05
6833	-3.8e-05
6834	-3e-05
6835	-2.6e-05
6836	-9e-06
6837	2e-06
6838	1e-06
6839	4e-06
6840	6e-06
6841	1.2e-05
6842	3.3e-05
6843	5.3e-05
6844	6.4e-05
6845	2.4e-05
6846	2.5e-05
6847	7.3e-05
6848	0.000122
6849	9.3e-05
6850	5.1e-05
6851	5e-05
6852	5.9e-05
6853	2.4e-05
6854	5e-06
6855	3.6e-05
6856	3e-05
6857	1.8e-05
6858	1.4e-05
6859	2.9e-05
6860	1.1e-05
6861	7e-06
6862	7.2e-05
6863	9.8e-05
6864	7.3e-05
6865	2.5e-05
6866	1.7e-05
6867	-7e-06
6868	-3.3e-05
6869	-2.4e-05
6870	2.6e-05
6871	5.6e-05
6872	3e-05
6873	1.5e-05
6874	2.3e-05
6875	5.1e-05
6876	9.1e-05
6877	0.000124
6878	0.00013
6879	0.000121
6880	0.000124
6881	0.000132
6882	0.000117
6883	0.00014
6884	0.000166
6885	0.000159
6886	0.000145
6887	0.000126
6888	8.1e-05
6889	3.8e-05
6890	2.3e-05
6891	2.4e-05
6892	2.3e-05
6893	3.2e-05
6894	5.3e-05
6895	5e-05
6896	6.3e-05
6897	7.8e-05
6898	4.3e-05
6899	1.7e-05
6900	1.3e-05
6901	1.8e-05
6902	5.1e-05
6903	8.1e-05
6904	0.000114
6905	0.00013
6906	0.000128
6907	0.000116
6908	0.000112
6909	0.00013
6910	0.000134
6911	0.000139
6912	0.000139
6913	0.000151
6914	0.000131
6915	0.000115
6916	0.000106
6917	0.000126
6918	0.000137
6919	0.000142
6920	0.000127
6921	9e-05
6922	6.4e-05
6923	2.6e-05
6924	-6e-06
6925	3.5e-05
6926	7.3e-05
6927	0.000112
6928	0.000119
6929	8.7e-05
6930	5.2e-05
6931	4.3e-05
6932	1.8e-05
6933	9e-06
6934	-3e-06
6935	-5e-06
6936	2.6e-05
6937	3.9e-05
6938	1.4e-05
6939	-1.4e-05
6940	-2.4e-05
6941	1e-06
6942	3.7e-05
6943	8.2e-05
6944	0.000121
6945	0.000116
6946	0.000102
6947	9.9e-05
6948	9e-05
6949	9.8e-05
6950	0.000126
6951	0.00015
6952	0.000156
6953	0.000124
6954	8.1e-05
6955	5.2e-05
6956	7.5e-05
6957	0.000112
6958	0.000139
6959	0.000149
6960	0.000117
6961	0.000119
6962	9.7e-05
6963	7.8e-05
6964	0.000104
6965	0.000117
6966	8.7e-05
6967	4.1e-05
6968	3.6e-05
6969	7.7e-05
6970	8.7e-05
6971	0.000101
6972	9.5e-05
6973	9.3e-05
6974	8.7e-05
6975	8.1e-05
6976	7.8e-05
6977	9.9e-05
6978	7.6e-05
6979	8e-05
6980	8.6e-05
6981	6.5e-05
6982	2e-05
6983	2.3e-05
6984	6.4e-05
6985	0.000112
6986	0.000115
6987	0.000102
6988	6.5e-05
6989	6.4e-05
6990	6.9e-05
6991	8.5e-05
6992	0.000105
6993	9.8e-05
6994	0.000102
6995	0.00012
6996	0.000169
6997	0.000193
6998	0.000203
6999	0.000176
7000	0.000143
7001	0.000116
7002	0.000112
7003	0.000154
7004	0.00017
7005	0.000139
7006	0.000122
7007	0.000111
7008	7.7e-05
7009	8.8e-05
7010	0.000145
7011	0.000186
7012	0.00017
7013	0.000142
7014	0.000138
7015	0.000108
7016	6.9e-05
7017	6.8e-05
7018	7.9e-05
7019	7.1e-05
7020	6.7e-05
7021	7.4e-05
7022	8.4e-05
7023	4.7e-05
7024	2.6e-05
7025	4e-05
7026	6.7e-05
7027	8.5e-05
7028	6.4e-05
7029	5.7e-05
7030	3.4e-05
7031	1e-05
7032	-2.4e-05
7033	-2.4e-05
7034	-2.3e-05
7035	-2.8e-05
7036	-2e-05
7037	-1.5e-05
7038	6e-06
7039	2e-05
7040	3.2e-05
7041	1.2e-05
7042	-1e-05
7043	-1.9e-05
7044	-5e-06
7045	1.1e-05
7046	1.3e-05
7047	1.9e-05
7048	6e-06
7049	-3.5e-05
7050	-5.6e-05
7051	-6.9e-05
7052	-6.7e-05
7053	-4.9e-05
7054	-4.8e-05
7055	-3.6e-05
7056	-5.5e-05
7057	-6.7e-05
7058	-7e-05
7059	-4.7e-05
7060	-4.5e-05
7061	-1.1e-05
7062	9e-06
7063	2e-05
7064	-2e-05
7065	-6.3e-05
7066	-0.0001
7067	-7.7e-05
7068	-7e-06
7069	2.1e-05
7070	4.1e-05
7071	4.1e-05
7072	2.2e-05
7073	1.5e-05
7074	1.4e-05
7075	1.7e-05
7076	-8e-06
7077	-1.4e-05
7078	-1.2e-05
7079	-2.2e-05
7080	-3.5e-05
7081	-4.7e-05
7082	-8.3e-05
7083	-0.000107
7084	-9.1e-05
7085	-7.4e-05
7086	-5.3e-05
7087	-4.2e-05
7088	-7.1e-05
7089	-7.9e-05
7090	-8.6e-05
7091	-8.4e-05
7092	-8.3e-05
7093	-5.4e-05
7094	-6.6e-05
7095	-8.4e-05
7096	-8.8e-05
7097	-7e-05
7098	-9.3e-05
7099	-9.2e-05
7100	-5.1e-05
7101	-7e-05
7102	-0.000105
7103	-8.9e-05
7104	-6.2e-05
7105	-5.5e-05
7106	-2.2e-05
7107	-1.6e-05
7108	-5.1e-05
7109	-6e-05
7110	-5.1e-05
7111	-5.5e-05
7112	-6.3e-05
7113	-3e-05
7114	-3.7e-05
7115	-5.5e-05
7116	-7e-05
7117	-1.5e-05
7118	2.5e-05
7119	6.6e-05
7120	0.000108
7121	0.000134
7122	0.000106
7123	5.1e-05
7124	2.6e-05
7125	6e-05
7126	8.2e-05
7127	8.3e-05
7128	5.2e-05
7129	4.3e-05
7130	2.3e-05
7131	1.3e-05
7132	-7e-06
7133	6e-06
7134	2.4e-05
7135	2e-05
7136	-1.5e-05
7137	-1.5e-05
7138	-6e-06
7139	1e-06
7140	-1.1e-05
7141	-5.5e-05
7142	-0.000105
7143	-0.000116
7144	-0.0001
7145	-7.4e-05
7146	-7e-05
7147	-8.9e-05
7148	-0.000107
7149	-0.000129
7150	-0.000116
7151	-0.000109
7152	-0.000127
7153	-0.000118
7154	-0.000107
7155	-0.000113
7156	-0.000103
7157	-5.9e-05
7158	-3.9e-05
7159	-4e-05
7160	-3.5e-05
7161	-3.5e-05
7162	-1.3e-05
7163	-1.7e-05
7164	-3.2e-05
7165	-2.3e-05
7166	-4e-05
7167	-8.5e-05
7168	-8.1e-05
7169	-9e-06
7170	3e-06
7171	4e-06
7172	1.6e-05
7173	3.2e-05
7174	2.9e-05
7175	5.5e-05
7176	8.4e-05
7177	6.7e-05
7178	2.7e-05
7179	-2.2e-05
7180	-5.2e-05
7181	-1.4e-05
7182	1e-05
7183	-6e-06
7184	-1.3e-05
7185	-2e-06
7186	3.2e-05
7187	3.1e-05
7188	3.6e-05
7189	6.8e-05
7190	0.00011
7191	0.000138
7192	0.000148
7193	0.00013
7194	0.000124
7195	6.9e-05
7196	3.4e-05
7197	3.9e-05
7198	4.1e-05
7199	4.1e-05
7200	7.1e-05
7201	0.0001
7202	6.4e-05
7203	1e-06
7204	-2.5e-05
7205	8e-06
7206	3e-05
7207	6.7e-05
7208	7.7e-05
7209	9.7e-05
7210	7.5e-05
7211	3.9e-05
7212	1.8e-05
7213	4.7e-05
7214	7.5e-05
7215	0.000118
7216	0.000121
7217	0.000103
7218	0.000115
7219	0.000123
7220	0.000101
7221	9.9e-05
7222	8e-05
7223	3.9e-05
7224	1.1e-05
7225	-4e-06
7226	-2.1e-05
7227	-1.4e-05
7228	-2.2e-05
7229	-4.5e-05
7230	-6.2e-05
7231	-8e-05
7232	-8.9e-05
7233	-5.5e-05
7234	-1.8e-05
7235	-2.8e-05
7236	-5.4e-05
7237	-9.6e-05
7238	-0.000137
7239	-0.000136
7240	-0.000119
7241	-6.8e-05
7242	-1.2e-05
7243	-1.5e-05
7244	-1.2e-05
7245	-7e-06
7246	-1.2e-05
7247	-2.5e-05
7248	-1e-06
7249	-6e-06
7250	-3.2e-05
7251	-6.6e-05
7252	-7.6e-05
7253	-6.1e-05
7254	-1.7e-05
7255	-5e-06
7256	2.3e-05
7257	4.1e-05
7258	3.2e-05
7259	-1.1e-05
7260	-4e-06
7261	-5e-06
7262	-3e-06
7263	2e-06
7264	1e-06
7265	-2e-05
7266	-3e-05
7267	-1.3e-05
7268	1.5e-05
7269	3.7e-05
7270	4.4e-05
7271	3.2e-05
7272	-2.7e-05
7273	-2.1e-05
7274	-1e-06
7275	1.1e-05
7276	-4.2e-05
7277	-5.6e-05
7278	-5.4e-05
7279	-5.3e-05
7280	-7.2e-05
7281	-6.4e-05
7282	-4.2e-05
7283	-2.8e-05
7284	-3.7e-05
7285	-2.5e-05
7286	0
7287	2.8e-05
7288	5.2e-05
7289	3.5e-05
7290	-8e-06
7291	-6.6e-05
7292	-9.7e-05
7293	-6.5e-05
7294	-1.2e-05
7295	-3.1e-05
7296	-5.2e-05
7297	-9.1e-05
7298	-0.000119
7299	-6.7e-05
7300	-1.5e-05
7301	4e-06
7302	-1.9e-05
7303	-4.7e-05
7304	-0.000104
7305	-0.000112
7306	-8.2e-05
7307	-3.8e-05
7308	-2.3e-05
7309	-3.7e-05
7310	-7.9e-05
7311	-0.000108
7312	-0.00012
7313	-0.000117
7314	-0.000139
7315	-0.000107
7316	-7.3e-05
7317	-5.2e-05
7318	-4.6e-05
7319	-6.3e-05
7320	-8.7e-05
7321	-7.9e-05
7322	-6.5e-05
7323	-5.8e-05
7324	-4.9e-05
7325	-2.5e-05
7326	1.3e-05
7327	2.8e-05
7328	2.3e-05
7329	-8e-06
7330	1.9e-05
7331	4.6e-05
7332	4.3e-05
7333	3.4e-05
7334	6.5e-05
7335	7.1e-05
7336	8.2e-05
7337	8.4e-05
7338	7.3e-05
7339	7.1e-05
7340	7.4e-05
7341	7.6e-05
7342	9.4e-05
7343	0.000116
7344	0.000123
7345	0.000108
7346	9.6e-05
7347	0.000105
7348	0.000148
7349	0.000153
7350	0.00014
7351	0.000139
7352	0.000159
7353	0.000149
7354	0.000135
7355	0.00014
7356	0.000158
7357	0.000189
7358	0.000175
7359	0.000177
7360	0.000171
7361	0.000173
7362	0.000185
7363	0.000222
7364	0.000218
7365	0.000182
7366	0.000145
7367	0.000182
7368	0.000207
7369	0.000223
7370	0.000208
7371	0.000187
7372	0.000216
7373	0.00021
7374	0.000193
7375	0.000176
7376	0.000211
7377	0.000179
7378	0.000157
7379	0.000142
7380	9.8e-05
7381	6.6e-05
7382	8.5e-05
7383	0.000101
7384	6.6e-05
7385	3.6e-05
7386	1.1e-05
7387	-5.4e-05
7388	-7.5e-05
7389	-4.9e-05
7390	0
7391	1e-06
7392	-5e-06
7393	-2.6e-05
7394	-4e-05
7395	-6e-05
7396	-1.8e-05
7397	2.4e-05
7398	9e-05
7399	7.1e-05
7400	5.8e-05
7401	6.9e-05
7402	8.1e-05
7403	7e-05
7404	7.5e-05
7405	9.5e-05
7406	9e-05
7407	6.7e-05
7408	6.3e-05
7409	6.4e-05
7410	0.000113
7411	0.000126
7412	0.000134
7413	8.9e-05
7414	5.1e-05
7415	6.6e-05
7416	0.000101
7417	0.000103
7418	0.000107
7419	0.000127
7420	0.000147
7421	0.000118
7422	7.5e-05
7423	6.1e-05
7424	5.1e-05
7425	4.7e-05
7426	2.2e-05
7427	1.5e-05
7428	1.7e-05
7429	4.2e-05
7430	0.000132
7431	0.000188
7432	0.000225
7433	0.000221
7434	0.000194
7435	0.000195
7436	0.000224
7437	0.000227
7438	0.000218
7439	0.000209
7440	0.000162
7441	0.000158
7442	0.000178
7443	0.000203
7444	0.000185
7445	0.000155
7446	9.9e-05
7447	9.2e-05
7448	0.000131
7449	0.000182
7450	0.000211
7451	0.000222
7452	0.000185
7453	0.000159
7454	0.000147
7455	0.00016
7456	0.000187
7457	0.000175
7458	0.000112
7459	5.6e-05
7460	3.3e-05
7461	3.9e-05
7462	4e-05
7463	3e-05
7464	-1e-05
7465	-2.7e-05
7466	-5.5e-05
7467	-6.7e-05
7468	-5.6e-05
7469	-2.2e-05
7470	-2.1e-05
7471	-2.2e-05
7472	-5.7e-05
7473	-7.2e-05
7474	-7.4e-05
7475	-3.8e-05
7476	-1.4e-05
7477	-1.6e-05
7478	-6.3e-05
7479	-8.7e-05
7480	-5.4e-05
7481	-3e-06
7482	2.1e-05
7483	1e-05
7484	-3e-06
7485	-2.8e-05
7486	-2e-06
7487	1.4e-05
7488	5.4e-05
7489	6e-05
7490	8.8e-05
7491	8.5e-05
7492	5.2e-05
7493	5.6e-05
7494	6e-05
7495	5.9e-05
7496	8.6e-05
7497	0.000107
7498	0.000117
7499	0.000127
7500	0.00014
7501	0.000143
7502	0.000153
7503	0.000151
7504	0.000151
7505	0.000147
7506	0.000129
7507	8.7e-05
7508	4.6e-05
7509	4.5e-05
7510	6.4e-05
7511	7.6e-05
7512	7.3e-05
7513	7.4e-05
7514	7.6e-05
7515	9e-05
7516	0.000109
7517	0.000142
7518	0.000173
7519	0.000231
7520	0.000237
7521	0.000174
7522	0.000148
7523	0.000161
7524	0.000149
7525	0.000137
7526	0.000157
7527	0.000198
7528	0.000223
7529	0.000219
7530	0.000218
7531	0.000199
7532	0.000178
7533	0.000189
7534	0.000197
7535	0.000172
7536	0.000145
7537	0.00016
7538	0.000196
7539	0.000195
7540	0.000226
7541	0.000221
7542	0.00021
7543	0.000216
7544	0.000264
7545	0.000264
7546	0.000244
7547	0.000239
7548	0.000271
7549	0.000266
7550	0.000255
7551	0.000251
7552	0.000251
7553	0.000244
7554	0.000229
7555	0.000215
7556	0.000191
7557	0.000204
7558	0.000263
7559	0.000249
7560	0.00014
7561	6e-05
7562	3.9e-05
7563	6.8e-05
7564	9.5e-05
7565	0.000113
7566	0.000116
7567	0.000125
7568	9.4e-05
7569	7.7e-05
7570	9.1e-05
7571	0.000124
7572	0.000139
7573	0.000128
7574	0.000133
7575	0.000135
7576	0.000124
7577	6.7e-05
7578	6e-05
7579	8e-05
7580	8.4e-05
7581	8.5e-05
7582	7.4e-05
7583	4.3e-05
7584	7e-05
7585	0.000126
7586	0.000161
7587	0.000159
7588	0.000129
7589	0.000119
7590	0.000127
7591	0.00015
7592	0.000215
7593	0.000289
7594	0.000321
7595	0.000296
7596	0.000281
7597	0.000255
7598	0.00025
7599	0.000221
7600	0.000227
7601	0.000197
7602	0.000212
7603	0.000196
7604	0.000129
7605	9.4e-05
7606	9.4e-05
7607	0.000119
7608	0.000157
7609	0.00019
7610	0.00019
7611	0.00018
7612	0.000166
7613	0.000125
7614	9.2e-05
7615	0.000122
7616	0.000162
7617	0.000193
7618	0.000203
7619	0.000196
7620	0.000155
7621	0.000117
7622	0.000115
7623	0.000179
7624	0.000246
7625	0.000235
7626	0.000179
7627	0.000159
7628	0.000131
7629	0.000133
7630	0.000122
7631	0.000153
7632	0.000152
7633	0.000138
7634	0.000154
7635	0.000197
7636	0.000227
7637	0.000237
7638	0.000224
7639	0.000187
7640	0.000191
7641	0.000202
7642	0.000151
7643	6.9e-05
7644	3.5e-05
7645	3.2e-05
7646	4.7e-05
7647	3.2e-05
7648	2e-05
7649	3e-05
7650	-9e-06
7651	-5.5e-05
7652	-5.7e-05
7653	-4.5e-05
7654	-2.9e-05
7655	-3.6e-05
7656	-2.6e-05
7657	-4.7e-05
7658	-7.1e-05
7659	-7.5e-05
7660	-6.6e-05
7661	-4.7e-05
7662	-2.7e-05
7663	2.8e-05
7664	6.8e-05
7665	9.6e-05
7666	0.000106
7667	0.000125
7668	0.000107
7669	0.000101
7670	9.4e-05
7671	5.7e-05
7672	7e-05
7673	0.000104
7674	9.9e-05
7675	8.5e-05
7676	7.2e-05
7677	5.4e-05
7678	7.3e-05
7679	0.000102
7680	0.000125
7681	0.000125
7682	0.00011
7683	0.000135
7684	0.00014
7685	0.000114
7686	9.7e-05
7687	8.7e-05
7688	0.000107
7689	0.000123
7690	0.000149
7691	0.000172
7692	0.000198
7693	0.00021
7694	0.000204
7695	0.00021
7696	0.000242
7697	0.000281
7698	0.000298
7699	0.000284
7700	0.000249
7701	0.000228
7702	0.00026
7703	0.000302
7704	0.000346
7705	0.000316
7706	0.000257
7707	0.000212
7708	0.00021
7709	0.00018
7710	0.000133
7711	0.000135
7712	0.000169
7713	0.000195
7714	0.000208
7715	0.00024
7716	0.000271
7717	0.000305
7718	0.000306
7719	0.000323
7720	0.000328
7721	0.000281
7722	0.000267
7723	0.000285
7724	0.000297
7725	0.000317
7726	0.000343
7727	0.000314
7728	0.000305
7729	0.000326
7730	0.000344
7731	0.000341
7732	0.000331
7733	0.000306
7734	0.000274
7735	0.000291
7736	0.000323
7737	0.000349
7738	0.000318
7739	0.000278
7740	0.000245
7741	0.000263
7742	0.00029
7743	0.000295
7744	0.000254
7745	0.000231
7746	0.000236
7747	0.00022
7748	0.000198
7749	0.000203
7750	0.000229
7751	0.00023
7752	0.000217
7753	0.000195
7754	0.000167
7755	0.000165
7756	0.000175
7757	0.000192
7758	0.000216
7759	0.000209
7760	0.000207
7761	0.000209
7762	0.000223
7763	0.000242
7764	0.000257
7765	0.000249
7766	0.000256
7767	0.000277
7768	0.000287
7769	0.000303
7770	0.000359
7771	0.000377
7772	0.00037
7773	0.000354
7774	0.000355
7775	0.000335
7776	0.000337
7777	0.000353
7778	0.000372
7779	0.000347
7780	0.000343
7781	0.000342
7782	0.000329
7783	0.000316
7784	0.000355
7785	0.000384
7786	0.00037
7787	0.00036
7788	0.000329
7789	0.000336
7790	0.000338
7791	0.000329
7792	0.000405
7793	0.000489
7794	0.000516
7795	0.000516
7796	0.000483
7797	0.000452
7798	0.000421
7799	0.000463
7800	0.000493
7801	0.000467
7802	0.000441
7803	0.00047
7804	0.000447
7805	0.000415
7806	0.000434
7807	0.000472
7808	0.00047
7809	0.00046
7810	0.000447
7811	0.000435
7812	0.000413
7813	0.000424
7814	0.000424
7815	0.000451
7816	0.000461
7817	0.000453
7818	0.000462
7819	0.000459
7820	0.000398
7821	0.000379
7822	0.000406
7823	0.000441
7824	0.000445
7825	0.000423
7826	0.000378
7827	0.000346
7828	0.000332
7829	0.00032
7830	0.000298
7831	0.000305
7832	0.000325
7833	0.000304
7834	0.000267
7835	0.000285
7836	0.000334
7837	0.000355
7838	0.000329
7839	0.000343
7840	0.000351
7841	0.000357
7842	0.000384
7843	0.000411
7844	0.000409
7845	0.000414
7846	0.000411
7847	0.000395
7848	0.000394
7849	0.000376
7850	0.000378
7851	0.00041
7852	0.00047
7853	0.000498
7854	0.000486
7855	0.000446
7856	0.000394
7857	0.000396
7858	0.000426
7859	0.000464
7860	0.00049
7861	0.000497
7862	0.000487
7863	0.000473
7864	0.000451
7865	0.000456
7866	0.000468
7867	0.000447
7868	0.000446
7869	0.000462
7870	0.000461
7871	0.00047
7872	0.000465
7873	0.000471
7874	0.000441
7875	0.000441
7876	0.000421
7877	0.000429
7878	0.000429
7879	0.000419
7880	0.000376
7881	0.000339
7882	0.00033
7883	0.000326
7884	0.00031
7885	0.000324
7886	0.000304
7887	0.000252
7888	0.000235
7889	0.000253
7890	0.000221
7891	0.000189
7892	0.000205
7893	0.000211
7894	0.000178
7895	0.000156
7896	0.00019
7897	0.000204
7898	0.000216
7899	0.000261
7900	0.000326
7901	0.000382
7902	0.000414
7903	0.000377
7904	0.00035
7905	0.000365
7906	0.000396
7907	0.000394
7908	0.000398
7909	0.000398
7910	0.000419
7911	0.000439
7912	0.000457
7913	0.000469
7914	0.00046
7915	0.000459
7916	0.00045
7917	0.000445
7918	0.000434
7919	0.000461
7920	0.000452
7921	0.000434
7922	0.000438
7923	0.000468
7924	0.000452
7925	0.000398
7926	0.000374
7927	0.00041
7928	0.000446
7929	0.000461
7930	0.000503
7931	0.000516
7932	0.000501
7933	0.00046
7934	0.000472
7935	0.000471
7936	0.000469
7937	0.000483
7938	0.000485
7939	0.000458
7940	0.000451
7941	0.000421
7942	0.000404
7943	0.000394
7944	0.000411
7945	0.000406
7946	0.000412
7947	0.000385
7948	0.000331
7949	0.000318
7950	0.000331
7951	0.000321
7952	0.000322
7953	0.000343
7954	0.00032
7955	0.000305
7956	0.000261
7957	0.000259
7958	0.000339
7959	0.000388
7960	0.000331
7961	0.000328
7962	0.000342
7963	0.000373
7964	0.000397
7965	0.000424
7966	0.000423
7967	0.000436
7968	0.000439
7969	0.00042
7970	0.000401
7971	0.000413
7972	0.000441
7973	0.000406
7974	0.000358
7975	0.000361
7976	0.000378
7977	0.000382
7978	0.000358
7979	0.000348
7980	0.000331
7981	0.000348
7982	0.000354
7983	0.000339
7984	0.000338
7985	0.000358
7986	0.000365
7987	0.000348
7988	0.000346
7989	0.000359
7990	0.000402
7991	0.000432
7992	0.000418
7993	0.000404
7994	0.000371
7995	0.000367
7996	0.000339
7997	0.000312
7998	0.000316
[truncated: 3,401 more rows]

## Sheet: Q372dC
Time	UV
6000	-0.001006
6001	-0.001044
6002	-0.001084
6003	-0.001105
6004	-0.001153
6005	-0.0012
6006	-0.001203
6007	-0.001198
6008	-0.001168
6009	-0.001166
6010	-0.001136
6011	-0.001136
6012	-0.001094
6013	-0.001068
6014	-0.00107
6015	-0.001107
6016	-0.001121
6017	-0.00112
6018	-0.0011
6019	-0.001086
6020	-0.001066
6021	-0.001023
6022	-0.001012
6023	-0.001039
6024	-0.001055
6025	-0.001057
6026	-0.001071
6027	-0.001047
6028	-0.001037
6029	-0.001032
6030	-0.001017
6031	-0.000966
6032	-0.000942
6033	-0.000931
6034	-0.000921
6035	-0.000911
6036	-0.000888
6037	-0.000848
6038	-0.000835
6039	-0.000851
6040	-0.000891
6041	-0.000878
6042	-0.000865
6043	-0.000885
6044	-0.000926
6045	-0.000926
6046	-0.000909
6047	-0.000885
6048	-0.000881
6049	-0.00089
6050	-0.0009
6051	-0.000907
6052	-0.000909
6053	-0.000892
6054	-0.000889
6055	-0.000892
6056	-0.000883
6057	-0.000857
6058	-0.000871
6059	-0.000891
6060	-0.000903
6061	-0.000888
6062	-0.000906
6063	-0.000919
6064	-0.000896
6065	-0.000878
6066	-0.000892
6067	-0.000896
6068	-0.000891
6069	-0.000933
6070	-0.000959
6071	-0.000965
6072	-0.000956
6073	-0.000962
6074	-0.000965
6075	-0.000955
6076	-0.000964
6077	-0.000979
6078	-0.000976
6079	-0.000985
6080	-0.000985
6081	-0.000975
6082	-0.000984
6083	-0.000976
6084	-0.00097
6085	-0.000951
6086	-0.000944
6087	-0.000929
6088	-0.000891
6089	-0.000908
6090	-0.000931
6091	-0.000912
6092	-0.000893
6093	-0.000926
6094	-0.000954
6095	-0.000977
6096	-0.00096
6097	-0.000934
6098	-0.00091
6099	-0.000912
6100	-0.000909
6101	-0.000874
6102	-0.000838
6103	-0.00086
6104	-0.000905
6105	-0.000903
6106	-0.000874
6107	-0.000881
6108	-0.000873
6109	-0.000849
6110	-0.000836
6111	-0.000854
6112	-0.000858
6113	-0.000854
6114	-0.000832
6115	-0.000833
6116	-0.000852
6117	-0.000846
6118	-0.000828
6119	-0.000815
6120	-0.000791
6121	-0.000779
6122	-0.000782
6123	-0.000783
6124	-0.000762
6125	-0.000772
6126	-0.000805
6127	-0.000853
6128	-0.000881
6129	-0.000886
6130	-0.000884
6131	-0.000884
6132	-0.000895
6133	-0.000891
6134	-0.000878
6135	-0.000857
6136	-0.000879
6137	-0.000896
6138	-0.000886
6139	-0.00088
6140	-0.000864
6141	-0.00084
6142	-0.000847
6143	-0.00082
6144	-0.000806
6145	-0.000767
6146	-0.000787
6147	-0.000829
6148	-0.000857
6149	-0.000881
6150	-0.000879
6151	-0.000874
6152	-0.000858
6153	-0.000861
6154	-0.000874
6155	-0.000894
6156	-0.000894
6157	-0.000894
6158	-0.000896
6159	-0.000909
6160	-0.000891
6161	-0.000884
6162	-0.000905
6163	-0.00093
6164	-0.000973
6165	-0.001001
6166	-0.000995
6167	-0.00099
6168	-0.001013
6169	-0.001059
6170	-0.001072
6171	-0.001051
6172	-0.001051
6173	-0.001045
6174	-0.001042
6175	-0.001049
6176	-0.001074
6177	-0.00107
6178	-0.001059
6179	-0.001035
6180	-0.001018
6181	-0.001008
6182	-0.001008
6183	-0.000977
6184	-0.000931
6185	-0.000903
6186	-0.000927
6187	-0.000956
6188	-0.000945
6189	-0.000941
6190	-0.000935
6191	-0.000982
6192	-0.000998
6193	-0.000973
6194	-0.000956
6195	-0.000977
6196	-0.001025
6197	-0.001057
6198	-0.001039
6199	-0.001022
6200	-0.001006
6201	-0.000985
6202	-0.000994
6203	-0.000991
6204	-0.00095
6205	-0.000912
6206	-0.000929
6207	-0.000959
6208	-0.000962
6209	-0.000932
6210	-0.000935
6211	-0.00095
6212	-0.000961
6213	-0.000961
6214	-0.000975
6215	-0.000991
6216	-0.000987
6217	-0.00099
6218	-0.000992
6219	-0.001011
6220	-0.000992
6221	-0.000971
6222	-0.000959
6223	-0.000983
6224	-0.000977
6225	-0.000942
6226	-0.000925
6227	-0.000944
6228	-0.000905
6229	-0.000868
6230	-0.000871
6231	-0.000911
6232	-0.000917
6233	-0.00092
6234	-0.000948
6235	-0.000925
6236	-0.000882
6237	-0.000856
6238	0
6239	0
6240	-3.8e-05
6241	-8.9e-05
6242	-0.000152
6243	-0.000206
6244	-0.000199
6245	-0.000119
6246	-5.2e-05
6247	-7e-05
6248	-7.7e-05
6249	-8.5e-05
6250	-0.00011
6251	-0.000133
6252	-0.000123
6253	-0.000122
6254	-0.000111
6255	-0.000114
6256	-0.00015
6257	-0.000156
6258	-0.000112
6259	-6.2e-05
6260	-4.1e-05
6261	-6.1e-05
6262	-9.1e-05
6263	-0.000104
6264	-0.000101
6265	-8.5e-05
6266	-4.1e-05
6267	-4.6e-05
6268	-9.2e-05
6269	-0.000106
6270	-7e-05
6271	-5.8e-05
6272	-4.9e-05
6273	-3.7e-05
6274	-2.5e-05
6275	-3.2e-05
6276	-6.2e-05
6277	-8.7e-05
6278	-8.2e-05
6279	-8.3e-05
6280	-6.7e-05
6281	-3.8e-05
6282	-3.3e-05
6283	-2.8e-05
6284	-5.5e-05
6285	-7e-05
6286	-6.1e-05
6287	-1.8e-05
6288	4e-06
6289	1e-06
6290	-4e-06
6291	1.2e-05
6292	1.8e-05
6293	3.4e-05
6294	7.6e-05
6295	0.000102
6296	7.8e-05
6297	7.5e-05
6298	8.1e-05
6299	0.000119
6300	0.000148
6301	0.000143
6302	9.9e-05
6303	8.8e-05
6304	0.000111
6305	0.000145
6306	0.000159
6307	0.000152
6308	0.000139
6309	0.000113
6310	4.3e-05
6311	-4.5e-05
6312	-6.8e-05
6313	-4.7e-05
6314	-6.2e-05
6315	-4.8e-05
6316	-4.5e-05
6317	-3.5e-05
6318	-1.9e-05
6319	-2.9e-05
6320	-5.8e-05
6321	-4e-05
6322	1e-06
6323	2.5e-05
6324	1.7e-05
6325	1.8e-05
6326	3.2e-05
6327	2.2e-05
6328	4.8e-05
6329	7.5e-05
6330	5.8e-05
6331	2.8e-05
6332	7e-06
6333	6e-06
6334	4e-06
6335	-9e-06
6336	4e-06
6337	2.6e-05
6338	3e-05
6339	1.5e-05
6340	1.5e-05
6341	5e-06
6342	-1.3e-05
6343	-2.9e-05
6344	-3.3e-05
6345	-5.1e-05
6346	-8e-05
6347	-8.4e-05
6348	-5.6e-05
6349	-6.1e-05
6350	-8.9e-05
6351	-6e-05
6352	-2.2e-05
6353	1.5e-05
6354	4.8e-05
6355	3.5e-05
6356	2.8e-05
6357	2.1e-05
6358	2.6e-05
6359	4.8e-05
6360	8.4e-05
6361	8.2e-05
6362	6.5e-05
6363	8.2e-05
6364	0.000114
6365	0.000105
6366	9.8e-05
6367	0.000116
6368	0.000109
6369	6e-05
6370	1.4e-05
6371	1.1e-05
6372	1.7e-05
6373	1e-06
6374	-9e-06
6375	3e-06
6376	3.9e-05
6377	7.4e-05
6378	0.00012
6379	0.000138
6380	0.000132
6381	0.000113
6382	0.000107
6383	8.2e-05
6384	4.7e-05
6385	2e-05
6386	2.9e-05
6387	3.1e-05
6388	1.4e-05
6389	6e-06
6390	3.8e-05
6391	4.4e-05
6392	1.7e-05
6393	1.4e-05
6394	3.7e-05
6395	2.9e-05
6396	3.8e-05
6397	7e-05
6398	7.7e-05
6399	6.3e-05
6400	9.2e-05
6401	0.000112
6402	9.3e-05
6403	3.4e-05
6404	4e-06
6405	-7e-06
6406	-2.3e-05
6407	-4e-05
6408	-4e-05
6409	-5.2e-05
6410	-8.3e-05
6411	-9e-05
6412	-5.6e-05
6413	-3.2e-05
6414	-4.2e-05
6415	-6.3e-05
6416	-6.2e-05
6417	-3.7e-05
6418	-4e-05
6419	-5.9e-05
6420	-6.4e-05
6421	-7e-05
6422	-9e-05
6423	-7.7e-05
6424	-7.6e-05
6425	-7.4e-05
6426	-6.6e-05
6427	-7.1e-05
6428	-7.9e-05
6429	-8.1e-05
6430	-4.8e-05
6431	-5.4e-05
6432	-6.5e-05
6433	-5.1e-05
6434	-3.7e-05
6435	-1.8e-05
6436	-1.6e-05
6437	9e-06
6438	1.4e-05
6439	-1.2e-05
6440	-3.6e-05
6441	-4.7e-05
6442	-3.6e-05
6443	-2.2e-05
6444	-7e-06
6445	-1.1e-05
6446	1.4e-05
6447	5e-05
6448	9.1e-05
6449	8.7e-05
6450	7.2e-05
6451	5.2e-05
6452	5.9e-05
6453	6.6e-05
6454	6.1e-05
6455	4.4e-05
6456	4.5e-05
6457	4.5e-05
6458	1.8e-05
6459	-1.1e-05
6460	-4.9e-05
6461	-8.1e-05
6462	-8e-05
6463	-9.3e-05
6464	-0.00011
6465	-8.8e-05
6466	-8.6e-05
6467	-0.000107
6468	-0.000111
6469	-0.000105
6470	-9.5e-05
6471	-7.8e-05
6472	-6.9e-05
6473	-9.1e-05
6474	-0.000116
6475	-0.000107
6476	-8.4e-05
6477	-0.000104
6478	-0.000166
6479	-0.000195
6480	-0.000184
6481	-0.000162
6482	-0.000153
6483	-0.000162
6484	-0.000175
6485	-0.000176
6486	-0.000161
6487	-0.000166
6488	-0.000153
6489	-0.000143
6490	-0.000143
6491	-0.000166
6492	-0.000172
6493	-0.000159
6494	-0.000147
6495	-0.00013
6496	-0.000128
6497	-0.000125
6498	-0.000102
6499	-8.3e-05
6500	-5e-05
6501	-8e-06
6502	-1e-06
6503	1.6e-05
6504	3e-05
6505	3.6e-05
6506	4.8e-05
6507	6.6e-05
6508	8.3e-05
6509	4.7e-05
6510	6e-06
6511	1e-05
6512	5.4e-05
6513	5e-05
6514	3.4e-05
6515	2.7e-05
6516	4.9e-05
6517	9.4e-05
6518	0.000132
6519	9.8e-05
6520	6.9e-05
6521	3.7e-05
6522	4e-05
6523	3.5e-05
6524	4.3e-05
6525	4.8e-05
6526	5.7e-05
6527	8e-05
6528	7.8e-05
6529	8.8e-05
6530	9.7e-05
6531	9.6e-05
6532	9.3e-05
6533	0.000109
6534	9.2e-05
6535	4e-05
6536	3.5e-05
6537	5.7e-05
6538	6.9e-05
6539	7.7e-05
6540	0.000119
6541	0.00014
6542	0.000154
6543	0.000154
6544	0.000194
6545	0.000194
6546	0.000168
6547	0.00012
6548	0.0001
6549	0.000104
6550	0.000103
6551	0.000101
6552	0.000107
6553	0.000115
6554	0.000123
6555	0.00015
6556	0.000166
6557	0.000133
6558	0.000139
6559	0.000128
6560	8.3e-05
6561	4.9e-05
6562	6.2e-05
6563	1.3e-05
6564	-1e-06
6565	3e-06
6566	-9e-06
6567	1.2e-05
6568	6e-06
6569	-1.7e-05
6570	-1.2e-05
6571	3.8e-05
6572	8.6e-05
6573	0.000106
6574	0.000103
6575	0.000104
6576	0.000102
6577	4.9e-05
6578	3e-06
6579	-3.3e-05
6580	-3.6e-05
6581	-4.6e-05
6582	-5.9e-05
6583	-5.8e-05
6584	-4.4e-05
6585	-3.7e-05
6586	-4e-05
6587	-4.7e-05
6588	-3.2e-05
6589	-6e-06
6590	-2.1e-05
6591	-2.5e-05
6592	1.2e-05
6593	2.4e-05
6594	1.2e-05
6595	3.5e-05
6596	4.4e-05
6597	3.6e-05
6598	6.2e-05
6599	7.5e-05
6600	6.3e-05
6601	4.3e-05
6602	4.7e-05
6603	4e-05
6604	4.6e-05
6605	6.3e-05
6606	7.8e-05
6607	7.2e-05
6608	7.8e-05
6609	9.8e-05
6610	9.3e-05
6611	0.000139
6612	0.000166
6613	0.000154
6614	0.000106
6615	0.000109
6616	0.000124
6617	0.000126
6618	0.000131
6619	0.000133
6620	0.000164
6621	0.000156
6622	0.000104
6623	8.7e-05
6624	0.000117
6625	0.000154
6626	0.000146
6627	0.000132
6628	0.000138
6629	0.000155
6630	0.000162
6631	0.00014
6632	0.00015
6633	0.000154
6634	0.000123
6635	6.7e-05
6636	5.5e-05
6637	4.2e-05
6638	3.2e-05
6639	4.7e-05
6640	6e-05
6641	5.1e-05
6642	8e-06
6643	-6e-06
6644	-2.7e-05
6645	-4e-05
6646	-5e-06
6647	1.2e-05
6648	-9e-06
6649	-7.2e-05
6650	-5.1e-05
6651	-2e-05
6652	2.3e-05
6653	3.3e-05
6654	4.3e-05
6655	6.7e-05
6656	7.1e-05
6657	2.1e-05
6658	4e-06
6659	1.4e-05
6660	1.1e-05
6661	2.1e-05
6662	5.1e-05
6663	6.3e-05
6664	3.9e-05
6665	4e-06
6666	-3.6e-05
6667	-1.9e-05
6668	-3e-05
6669	-1.8e-05
6670	1.6e-05
6671	5.4e-05
6672	4.2e-05
6673	4.1e-05
6674	5.2e-05
6675	2.9e-05
6676	-3e-06
6677	1.2e-05
6678	3.4e-05
6679	7e-06
6680	-3.6e-05
6681	-9e-06
6682	5e-06
6683	-1.5e-05
6684	-3.9e-05
6685	-3.1e-05
6686	-2.1e-05
6687	1.6e-05
6688	3.8e-05
6689	3.7e-05
6690	3.5e-05
6691	3.6e-05
6692	1.7e-05
6693	1.8e-05
6694	8e-06
6695	1.9e-05
6696	3.8e-05
6697	-8e-06
6698	-3.3e-05
6699	-1.7e-05
6700	-3.8e-05
6701	-7.1e-05
6702	-8.8e-05
6703	-5.3e-05
6704	-2.7e-05
6705	-3.9e-05
6706	-8.3e-05
6707	-8.3e-05
6708	-0.000115
6709	-0.000135
6710	-0.000152
6711	-0.000166
6712	-0.000154
6713	-0.000152
6714	-0.000147
6715	-0.000115
6716	-0.000103
6717	-9.5e-05
6718	-6.9e-05
6719	-4.9e-05
6720	-2.6e-05
6721	1.1e-05
6722	5.7e-05
6723	5.7e-05
6724	5.7e-05
6725	6.3e-05
6726	6.9e-05
6727	6.5e-05
6728	7.3e-05
6729	5.1e-05
6730	3.2e-05
6731	2.7e-05
6732	3.8e-05
6733	3.8e-05
6734	6.7e-05
6735	9.6e-05
6736	6e-05
6737	6.5e-05
6738	0.000103
6739	9.3e-05
6740	8.2e-05
6741	9.8e-05
6742	0.000139
6743	0.000213
6744	0.000267
6745	0.000295
6746	0.000278
6747	0.000268
6748	0.000229
6749	0.000211
6750	0.000195
6751	0.000193
6752	0.000188
6753	0.000193
6754	0.000187
6755	0.000165
6756	0.000129
6757	0.000139
6758	0.000167
6759	0.000183
6760	0.000149
6761	0.000116
6762	9.1e-05
6763	9.6e-05
6764	9.9e-05
6765	9.3e-05
6766	0.000123
6767	0.000136
6768	0.000146
6769	0.000158
6770	0.000135
6771	6e-05
6772	4.2e-05
6773	6.4e-05
6774	0.000103
6775	0.000105
6776	0.00012
6777	0.000135
6778	0.000155
6779	0.000168
6780	0.000163
6781	0.000142
6782	0.000101
6783	5.6e-05
6784	6.1e-05
6785	0.000108
6786	0.000171
6787	0.000198
6788	0.000184
6789	0.000176
6790	0.000223
6791	0.000203
6792	0.0001
6793	6.8e-05
6794	9.9e-05
6795	0.000124
6796	0.000123
6797	0.000131
6798	0.000135
6799	0.000113
6800	0.000108
6801	9e-05
6802	8.2e-05
6803	8.7e-05
6804	7.9e-05
6805	6.6e-05
6806	3.4e-05
6807	3.7e-05
6808	5.8e-05
6809	4.3e-05
6810	-1.2e-05
6811	-3.8e-05
6812	-8e-06
6813	4.7e-05
6814	0.000113
6815	0.000107
6816	0.000102
6817	9.4e-05
6818	7.4e-05
6819	6e-05
6820	8.7e-05
6821	0.000103
6822	0.000121
6823	0.000108
6824	9.9e-05
6825	8.5e-05
6826	0.000108
6827	0.000139
6828	0.00015
6829	0.000129
6830	0.000131
6831	0.000149
6832	0.000152
6833	0.000148
6834	0.000136
6835	0.000134
6836	0.000164
6837	0.000226
6838	0.000225
6839	0.000174
6840	0.000119
6841	0.000116
6842	0.00013
6843	0.000196
6844	0.000254
6845	0.000275
6846	0.000263
6847	0.000258
6848	0.000221
6849	0.000194
6850	0.000177
6851	0.00016
6852	0.000123
6853	0.0001
6854	0.000133
6855	0.000192
6856	0.000199
6857	0.000173
6858	0.000197
6859	0.000237
6860	0.000247
6861	0.000237
6862	0.000215
6863	0.000216
6864	0.000227
6865	0.000238
6866	0.00023
6867	0.000183
6868	0.000194
6869	0.00024
6870	0.000256
6871	0.000222
6872	0.000205
6873	0.000205
6874	0.000212
6875	0.000209
6876	0.000198
6877	0.000199
6878	0.000209
6879	0.000214
6880	0.000242
6881	0.000256
6882	0.00025
6883	0.000233
6884	0.000267
6885	0.00032
6886	0.000343
6887	0.000344
6888	0.000339
6889	0.000321
6890	0.00031
6891	0.000325
6892	0.000309
6893	0.000297
6894	0.000286
6895	0.000268
6896	0.000253
6897	0.000213
6898	0.000203
6899	0.0002
6900	0.000224
6901	0.000258
6902	0.000259
6903	0.000263
6904	0.000292
6905	0.000313
6906	0.000328
6907	0.000322
6908	0.000297
6909	0.000248
6910	0.000228
6911	0.000229
6912	0.000226
6913	0.000212
6914	0.000205
6915	0.000145
6916	8.3e-05
6917	8.8e-05
6918	0.000108
6919	0.000107
6920	9.5e-05
6921	0.000104
6922	0.000135
6923	0.000159
6924	0.000182
6925	0.000198
6926	0.000252
6927	0.000309
6928	0.00035
6929	0.000359
6930	0.00035
6931	0.000332
6932	0.000314
6933	0.000319
6934	0.000313
6935	0.000315
6936	0.000322
6937	0.000338
6938	0.000365
6939	0.000374
6940	0.000365
6941	0.000356
6942	0.000357
6943	0.000335
6944	0.000348
6945	0.000359
6946	0.000343
6947	0.000341
6948	0.000349
6949	0.000359
6950	0.000378
6951	0.000376
6952	0.000341
6953	0.000343
6954	0.00035
6955	0.000363
6956	0.000377
6957	0.000404
6958	0.000419
6959	0.000387
6960	0.000388
6961	0.000408
6962	0.000416
6963	0.000401
6964	0.000429
6965	0.000439
6966	0.000448
6967	0.000443
6968	0.000437
6969	0.00044
6970	0.000466
6971	0.000506
6972	0.000578
6973	0.000621
6974	0.000621
6975	0.000584
6976	0.000541
6977	0.000489
6978	0.000433
6979	0.000427
6980	0.000447
6981	0.000462
6982	0.000439
6983	0.000453
6984	0.00048
6985	0.000477
6986	0.000508
6987	0.000553
6988	0.000541
6989	0.000496
6990	0.000448
6991	0.000466
6992	0.000505
6993	0.00052
6994	0.000481
6995	0.00042
6996	0.000429
6997	0.000491
6998	0.000536
6999	0.000555
7000	0.000584
7001	0.000602
7002	0.000585
7003	0.000574
7004	0.000578
7005	0.000557
7006	0.000539
7007	0.000533
7008	0.000525
7009	0.000502
7010	0.00049
7011	0.000483
7012	0.000455
7013	0.000485
7014	0.000515
7015	0.000503
7016	0.000477
7017	0.000495
7018	0.000488
7019	0.000443
7020	0.000405
7021	0.000376
7022	0.00036
7023	0.000351
7024	0.000343
7025	0.00037
7026	0.000378
7027	0.000344
7028	0.000329
7029	0.000373
7030	0.000432
7031	0.000451
7032	0.000448
7033	0.00043
7034	0.000428
7035	0.000502
7036	0.000562
7037	0.000547
7038	0.00052
7039	0.000518
7040	0.000501
7041	0.000498
7042	0.000511
7043	0.000503
7044	0.000451
7045	0.000362
7046	0.000291
7047	0.000281
7048	0.000289
7049	0.000321
7050	0.000356
7051	0.000361
7052	0.000369
7053	0.000411
7054	0.000462
7055	0.000446
7056	0.000389
7057	0.000353
7058	0.00034
7059	0.00034
7060	0.00033
7061	0.000335
7062	0.000313
7063	0.000332
7064	0.000396
7065	0.000396
7066	0.000335
7067	0.000313
7068	0.000292
7069	0.000302
7070	0.000328
7071	0.000331
7072	0.000345
7073	0.000353
7074	0.000361
7075	0.000352
7076	0.000341
7077	0.000344
7078	0.000341
7079	0.000379
7080	0.000384
7081	0.000377
7082	0.000386
7083	0.000386
7084	0.000361
7085	0.000343
7086	0.000347
7087	0.000352
7088	0.000353
7089	0.000389
7090	0.000404
7091	0.000384
7092	0.000386
7093	0.000439
7094	0.00049
7095	0.000523
7096	0.000567
7097	0.000549
7098	0.000519
7099	0.000483
7100	0.000451
7101	0.000437
7102	0.000443
7103	0.000478
7104	0.000501
7105	0.000508
7106	0.000522
7107	0.000561
7108	0.000585
7109	0.000594
7110	0.000564
7111	0.000534
7112	0.000506
7113	0.000511
7114	0.000559
7115	0.000573
7116	0.000567
7117	0.000582
7118	0.00059
7119	0.000558
7120	0.000546
7121	0.000575
7122	0.000613
7123	0.000612
7124	0.000564
7125	0.000537
7126	0.000546
7127	0.000575
7128	0.000592
7129	0.000632
7130	0.000641
7131	0.000597
7132	0.000551
7133	0.000564
7134	0.000578
7135	0.000558
7136	0.000535
7137	0.000542
7138	0.000562
7139	0.000572
7140	0.000561
7141	0.000539
7142	0.000548
7143	0.000585
7144	0.000599
7145	0.000601
7146	0.000593
7147	0.000585
7148	0.000584
7149	0.000586
7150	0.000596
7151	0.000567
7152	0.000547
7153	0.000531
7154	0.00054
7155	0.000519
7156	0.000527
7157	0.000541
7158	0.000532
7159	0.000468
7160	0.000414
7161	0.000399
7162	0.000395
7163	0.000411
7164	0.000399
7165	0.000376
7166	0.000354
7167	0.000354
7168	0.000363
7169	0.00036
7170	0.000323
7171	0.000241
7172	0.000201
7173	0.000188
7174	0.000189
7175	0.000151
7176	0.000115
7177	0.000122
7178	0.000141
7179	0.000163
7180	0.000137
7181	0.000124
7182	0.000127
7183	0.000157
7184	0.000182
7185	0.000194
7186	0.000186
7187	0.000217
7188	0.00024
7189	0.000233
7190	0.000212
7191	0.000206
7192	0.000226
7193	0.000231
7194	0.000236
7195	0.000238
7196	0.000283
7197	0.000339
7198	0.000337
7199	0.000346
7200	0.000336
7201	0.000329
7202	0.00027
7203	0.000222
7204	0.000202
7205	0.000219
7206	0.000238
7207	0.000242
7208	0.000246
7209	0.000241
7210	0.000259
7211	0.000311
7212	0.000356
7213	0.000347
7214	0.000324
7215	0.000313
7216	0.000308
7217	0.00036
7218	0.000402
7219	0.000382
7220	0.000372
7221	0.000404
7222	0.000451
7223	0.000482
7224	0.000499
7225	0.00046
7226	0.00044
7227	0.000434
7228	0.000424
7229	0.000405
7230	0.000365
7231	0.000336
7232	0.000357
7233	0.000403
7234	0.000393
7235	0.000385
7236	0.000428
7237	0.000459
7238	0.000395
7239	0.000336
7240	0.00031
7241	0.000308
7242	0.000327
7243	0.000344
7244	0.000324
7245	0.000294
7246	0.000281
7247	0.00029
7248	0.000331
7249	0.000352
7250	0.000325
7251	0.000295
7252	0.000303
7253	0.000324
7254	0.000333
7255	0.000333
7256	0.000336
7257	0.000329
7258	0.000332
7259	0.000296
7260	0.00019
7261	0.00014
7262	0.000168
7263	0.000229
7264	0.000221
7265	0.000177
7266	0.000165
7267	0.000186
7268	0.000185
7269	0.000142
7270	0.000136
7271	0.000173
7272	0.000196
7273	0.000203
7274	0.000203
7275	0.000222
7276	0.000248
7277	0.000261
7278	0.000274
7279	0.000292
7280	0.000315
7281	0.000284
7282	0.000271
7283	0.000286
7284	0.000302
7285	0.000308
7286	0.000334
7287	0.000346
7288	0.000345
7289	0.000369
7290	0.000408
7291	0.000413
7292	0.000383
7293	0.000338
7294	0.000303
7295	0.000269
7296	0.000224
7297	0.000211
7298	0.000192
7299	0.000175
7300	0.000143
7301	0.00017
7302	0.000201
7303	0.000211
7304	0.00017
7305	0.000137
7306	0.000134
7307	0.000152
7308	0.000163
7309	0.000171
7310	0.000168
7311	0.000167
7312	0.000208
7313	0.000221
7314	0.000225
7315	0.000202
7316	0.000212
7317	0.000252
7318	0.000288
7319	0.000315
7320	0.000282
7321	0.000242
7322	0.000257
7323	0.000291
7324	0.000284
7325	0.000251
7326	0.000286
7327	0.000337
7328	0.00037
7329	0.000383
7330	0.000365
7331	0.000363
7332	0.000362
7333	0.000369
7334	0.000365
7335	0.000375
7336	0.000352
7337	0.000299
7338	0.000291
7339	0.000292
7340	0.000285
7341	0.000303
7342	0.00033
7343	0.00034
7344	0.000332
7345	0.000303
7346	0.00031
7347	0.000288
7348	0.000228
7349	0.000178
7350	0.000147
7351	0.000167
7352	0.000196
7353	0.000187
7354	0.000158
7355	0.000185
7356	0.000228
7357	0.000255
7358	0.000301
7359	0.000318
7360	0.000282
7361	0.00023
7362	0.000234
7363	0.000282
7364	0.00034
7365	0.000344
7366	0.00035
7367	0.000367
7368	0.000393
7369	0.000352
7370	0.000317
7371	0.000307
7372	0.000325
7373	0.000334
7374	0.000317
7375	0.00031
7376	0.00031
7377	0.000329
7378	0.0003
7379	0.000201
7380	0.000129
7381	0.000121
7382	0.000141
7383	0.000161
7384	0.000174
7385	0.000196
7386	0.000212
7387	0.000219
7388	0.000193
7389	0.000169
7390	0.000148
7391	0.000168
7392	0.000176
7393	0.00016
7394	0.000159
7395	0.000205
7396	0.000222
7397	0.000234
7398	0.000219
7399	0.000232
7400	0.000197
7401	0.000181
7402	0.000193
7403	0.000213
7404	0.000205
7405	0.000167
7406	0.000158
7407	0.000163
7408	0.000148
7409	0.000141
7410	0.000147
7411	0.000146
7412	0.000112
7413	0.00013
7414	0.00012
7415	0.000104
7416	0.00011
7417	0.000136
7418	0.000118
7419	8.1e-05
7420	4.7e-05
7421	4.6e-05
7422	1.6e-05
7423	-1.6e-05
7424	-6e-06
7425	3e-06
7426	-1e-06
7427	4e-06
7428	1.5e-05
7429	3.4e-05
7430	4e-05
7431	-1.2e-05
7432	-8.4e-05
7433	-0.000119
7434	-7.4e-05
7435	-4.5e-05
7436	-8.3e-05
7437	-9.8e-05
7438	-6.5e-05
7439	-4.3e-05
7440	-7.2e-05
7441	-5.5e-05
7442	-2.4e-05
7443	4e-06
7444	2.2e-05
7445	7e-06
7446	-3.9e-05
7447	-7.4e-05
7448	-8.1e-05
7449	-9e-05
7450	-7.5e-05
7451	-6e-05
7452	-2.5e-05
7453	-1.7e-05
7454	4e-06
7455	3.6e-05
7456	2.9e-05
7457	-7e-06
7458	-3.1e-05
7459	1.5e-05
7460	3.5e-05
7461	7e-06
7462	-7e-06
7463	-1.2e-05
7464	5e-06
7465	1e-05
7466	1.3e-05
7467	-1.2e-05
7468	-4.7e-05
7469	-1.9e-05
7470	1.6e-05
7471	1.6e-05
7472	6e-06
7473	3e-05
7474	7.6e-05
7475	7.4e-05
7476	6.1e-05
7477	4.8e-05
7478	4.6e-05
7479	5.7e-05
7480	6.5e-05
7481	8.6e-05
7482	8.5e-05
7483	7e-05
7484	5.4e-05
7485	5.5e-05
7486	2.2e-05
7487	3.3e-05
7488	8.1e-05
7489	9.2e-05
7490	6.6e-05
7491	6.7e-05
7492	7.5e-05
7493	9.5e-05
7494	0.000128
7495	0.000131
7496	0.000107
7497	8.2e-05
7498	6.3e-05
7499	6.3e-05
7500	6.6e-05
7501	3.7e-05
7502	2.8e-05
7503	4.4e-05
7504	9.5e-05
7505	0.000134
7506	0.00013
7507	9.6e-05
7508	6.8e-05
7509	7.6e-05
7510	8.1e-05
7511	7.4e-05
7512	8.6e-05
7513	8e-05
7514	4.4e-05
7515	4.9e-05
7516	6.3e-05
7517	3.4e-05
7518	9e-06
7519	4e-06
7520	-4e-06
7521	-1e-05
7522	-1e-06
7523	4e-06
7524	3.5e-05
7525	5.4e-05
7526	7.7e-05
7527	9.2e-05
7528	0.00013
7529	0.000155
7530	0.000164
7531	0.000163
7532	0.000161
7533	0.000169
7534	0.000133
7535	0.000128
7536	0.000158
7537	0.000131
7538	0.000121
7539	0.000137
7540	0.000159
7541	0.000153
7542	0.000107
7543	7.1e-05
7544	5.1e-05
7545	3.2e-05
7546	1.1e-05
7547	2.4e-05
7548	5.9e-05
7549	5.1e-05
7550	2.2e-05
7551	3.9e-05
7552	6.7e-05
7553	7.1e-05
7554	1.4e-05
7555	-2.2e-05
7556	2.3e-05
7557	8.2e-05
7558	0.000108
7559	0.000105
7560	6.2e-05
7561	4.9e-05
7562	8e-05
7563	0.000102
7564	0.000106
7565	0.000105
7566	0.000122
7567	0.000133
7568	0.000128
7569	0.00012
7570	9.7e-05
7571	0.000103
7572	0.000127
7573	0.00014
7574	0.000132
7575	0.000111
7576	6.6e-05
7577	3.9e-05
7578	5.6e-05
7579	6.6e-05
7580	7.4e-05
7581	0.000102
7582	0.000152
7583	0.000205
7584	0.000235
7585	0.000234
7586	0.000206
7587	0.000197
7588	0.000229
7589	0.000267
7590	0.000245
7591	0.000224
7592	0.000212
7593	0.000243
7594	0.000281
7595	0.000293
7596	0.000263
7597	0.000226
7598	0.000208
7599	0.000185
7600	0.000182
7601	0.000165
7602	0.000137
7603	0.000142
7604	0.000119
7605	0.000106
7606	0.000105
7607	9.6e-05
7608	8.7e-05
7609	2.5e-05
7610	-2e-06
7611	3.2e-05
7612	6.1e-05
7613	1.7e-05
7614	-2.8e-05
7615	-5e-05
7616	-4.6e-05
7617	-5.9e-05
7618	-6.4e-05
7619	-2.9e-05
7620	-7e-06
7621	-8e-06
7622	-1.2e-05
7623	-1e-06
7624	-1.3e-05
7625	-3.1e-05
7626	-6.6e-05
7627	-9.1e-05
7628	-5.5e-05
7629	-2.2e-05
7630	-1e-06
7631	1.2e-05
7632	3e-06
7633	-4e-05
7634	-5.5e-05
7635	-5.7e-05
7636	-6.9e-05
7637	-8.4e-05
7638	-9.5e-05
7639	-9.5e-05
7640	-7e-05
7641	-4e-05
7642	-7e-06
7643	1.7e-05
7644	1.2e-05
7645	-3.2e-05
7646	-8.9e-05
7647	-0.000125
7648	-0.000162
7649	-0.000181
7650	-0.000174
7651	-0.000162
7652	-7.7e-05
7653	-2.2e-05
7654	-4.5e-05
7655	-8.3e-05
7656	-9.9e-05
7657	-8.5e-05
7658	-6.1e-05
7659	-4.3e-05
7660	-5.6e-05
7661	-7.8e-05
7662	-9.4e-05
7663	-7.5e-05
7664	-2.6e-05
7665	7e-06
7666	2.3e-05
7667	5.1e-05
7668	7e-05
7669	7.8e-05
7670	6.3e-05
7671	3.1e-05
7672	4.2e-05
7673	3e-05
7674	1.3e-05
7675	8e-06
7676	1.3e-05
7677	2.3e-05
7678	3.8e-05
7679	5.9e-05
7680	5.9e-05
7681	3.6e-05
7682	-3e-06
7683	-1.1e-05
7684	2e-05
7685	2e-05
7686	2.1e-05
7687	1.7e-05
7688	2e-05
7689	2.1e-05
7690	2.7e-05
7691	6e-05
7692	9.6e-05
7693	0.000139
7694	0.000169
7695	0.000159
7696	8.3e-05
7697	3.7e-05
7698	1.1e-05
7699	4.4e-05
7700	6.6e-05
7701	7.5e-05
7702	6.2e-05
7703	7e-05
7704	7.8e-05
7705	7.6e-05
7706	7.4e-05
7707	6.8e-05
7708	3.4e-05
7709	-2.6e-05
7710	-4.3e-05
7711	-6e-06
7712	1e-06
7713	7e-06
7714	1.5e-05
7715	4.5e-05
7716	4.7e-05
7717	3.4e-05
7718	2.4e-05
7719	1.7e-05
7720	4e-06
7721	8e-06
7722	2.2e-05
7723	-1.4e-05
7724	-1.4e-05
7725	-2.6e-05
7726	-4.7e-05
7727	-5.1e-05
7728	-2.8e-05
7729	-3.2e-05
7730	-6.8e-05
7731	-0.0001
7732	-8.8e-05
7733	-5.7e-05
7734	-5.3e-05
7735	-6e-05
7736	-7.7e-05
7737	-0.000104
7738	-0.000117
7739	-0.000116
7740	-0.000104
7741	-0.000101
7742	-9.3e-05
7743	-6.1e-05
7744	-6.7e-05
7745	-0.000139
7746	-0.00022
7747	-0.000225
7748	-0.000187
7749	-0.000165
7750	-0.000187
7751	-0.000216
7752	-0.000251
7753	-0.000245
7754	-0.0002
7755	-0.00013
7756	-0.000105
7757	-0.000107
7758	-0.000118
7759	-0.000108
7760	-0.000118
7761	-9.7e-05
7762	-9.2e-05
7763	-8.7e-05
7764	-8.9e-05
7765	-9e-05
7766	-9e-05
7767	-0.000106
7768	-0.000104
7769	-9.1e-05
7770	-7.5e-05
7771	-7.7e-05
7772	-7.5e-05
7773	-4.9e-05
7774	-2.2e-05
7775	-5.2e-05
7776	-8.8e-05
7777	-8.1e-05
7778	-9.6e-05
7779	-0.000132
7780	-0.000156
7781	-0.000124
7782	-0.000101
7783	-9.9e-05
7784	-0.000105
7785	-0.000111
7786	-0.000126
7787	-0.000128
7788	-0.000127
7789	-0.000121
7790	-0.000142
7791	-0.000139
7792	-0.000108
7793	-7.6e-05
7794	-7.1e-05
7795	-7.7e-05
7796	-9.6e-05
7797	-8.7e-05
7798	-6.1e-05
7799	-3.6e-05
7800	-6.2e-05
7801	-7.2e-05
7802	-1.2e-05
7803	4.4e-05
7804	5.1e-05
7805	5.8e-05
7806	4.4e-05
7807	4.5e-05
7808	5.3e-05
7809	2.7e-05
7810	-2.7e-05
7811	-3.1e-05
7812	-3e-06
7813	3.6e-05
7814	5.3e-05
7815	5.8e-05
7816	8e-05
7817	0.000106
7818	0.000104
7819	0.000115
7820	0.000122
7821	0.000124
7822	0.000103
7823	9.6e-05
7824	0.0001
7825	9.7e-05
7826	8.7e-05
7827	5.3e-05
7828	-1.7e-05
7829	-3.7e-05
7830	-6.4e-05
7831	-0.000103
7832	-0.000134
7833	-0.00016
7834	-0.000147
7835	-0.000139
7836	-0.000132
7837	-0.000113
7838	-0.000123
7839	-0.000128
7840	-0.000128
7841	-0.00014
7842	-0.00016
7843	-0.000144
7844	-0.00014
7845	-0.000142
7846	-0.000133
7847	-0.000131
7848	-0.0001
7849	-3.7e-05
7850	1.7e-05
7851	3.3e-05
7852	2.9e-05
7853	2.9e-05
7854	8e-06
7855	-2.3e-05
7856	-5.8e-05
7857	-7e-05
7858	-7.1e-05
7859	-5.9e-05
7860	-5.2e-05
7861	-7.5e-05
7862	-9.6e-05
7863	-9.5e-05
7864	-0.0001
7865	-0.000102
7866	-7.9e-05
7867	-3.9e-05
7868	-5.1e-05
7869	-9.1e-05
7870	-9.3e-05
7871	-9.4e-05
7872	-8.9e-05
7873	-7.2e-05
7874	-6.3e-05
7875	-4e-05
7876	-1e-05
7877	8e-06
7878	0
7879	-1.5e-05
7880	-2.1e-05
7881	-7e-06
7882	1.2e-05
7883	2.1e-05
7884	3.3e-05
7885	-1.4e-05
7886	-3.9e-05
7887	-4.5e-05
7888	-3.2e-05
7889	-5.8e-05
7890	-9.3e-05
7891	-7.7e-05
7892	-6.1e-05
7893	-7.7e-05
7894	-8.6e-05
7895	-6.7e-05
7896	-1.4e-05
7897	-1.1e-05
7898	-1.7e-05
7899	-2.3e-05
7900	-3.8e-05
7901	-4.9e-05
7902	-3.7e-05
7903	-5e-06
7904	1.9e-05
7905	-3e-06
7906	-5.4e-05
7907	-7.9e-05
7908	-6.3e-05
7909	-2.3e-05
7910	-3.2e-05
7911	-6.6e-05
7912	-3.9e-05
7913	0
7914	-2e-05
7915	-2.1e-05
7916	-4.6e-05
7917	-7e-05
7918	-8.8e-05
7919	-8.8e-05
7920	-0.000111
7921	-0.000107
7922	-9.8e-05
7923	-7.3e-05
7924	-6.8e-05
7925	-8.4e-05
7926	-0.000116
7927	-0.000154
7928	-0.000175
7929	-0.000223
7930	-0.000244
7931	-0.000256
7932	-0.000306
7933	-0.000336
7934	-0.000324
7935	-0.00028
7936	-0.000243
7937	-0.000219
7938	-0.000234
7939	-0.000282
7940	-0.000316
7941	-0.000301
7942	-0.000321
7943	-0.00037
7944	-0.000377
7945	-0.000369
7946	-0.000369
7947	-0.000404
7948	-0.00042
7949	-0.000406
7950	-0.000406
7951	-0.00038
7952	-0.000406
7953	-0.000416
7954	-0.000432
7955	-0.00043
7956	-0.00047
7957	-0.000477
7958	-0.000524
7959	-0.000546
7960	-0.000542
7961	-0.000513
7962	-0.000509
7963	-0.000496
7964	-0.000492
7965	-0.00046
7966	-0.000476
7967	-0.000491
7968	-0.000484
7969	-0.000449
7970	-0.00042
7971	-0.000424
7972	-0.00044
7973	-0.000408
7974	-0.000383
7975	-0.000375
7976	-0.000398
7977	-0.00041
7978	-0.000413
7979	-0.000442
7980	-0.000466
7981	-0.000469
7982	-0.000456
7983	-0.000482
7984	-0.000522
7985	-0.00055
7986	-0.000525
7987	-0.000475
7988	-0.000467
7989	-0.000489
7990	-0.000518
7991	-0.000561
7992	-0.000607
7993	-0.000604
7994	-0.00058
7995	-0.000536
7996	-0.000517
7997	-0.000503
7998	-0.000501
[truncated: 3,401 more rows]

## Sheet: N359dC (A)
Time	UV
6000	0.000325
6001	0.000327
6002	0.000354
6003	0.000344
6004	0.000334
6005	0.000344
6006	0.000387
6007	0.000396
6008	0.000378
6009	0.000349
6010	0.00036
6011	0.000389
6012	0.000416
6013	0.0004
6014	0.000364
6015	0.000347
6016	0.000335
6017	0.000363
6018	0.000369
6019	0.000365
6020	0.00037
6021	0.000385
6022	0.0004
6023	0.000388
6024	0.000339
6025	0.00033
6026	0.00032
6027	0.000256
6028	0.000198
6029	0.00022
6030	0.000232
6031	0.000222
6032	0.000236
6033	0.000295
6034	0.00031
6035	0.000259
6036	0.00024
6037	0.000258
6038	0.000296
6039	0.000299
6040	0.000281
6041	0.00026
6042	0.000245
6043	0.000219
6044	0.000188
6045	0.000198
6046	0.000234
6047	0.000283
6048	0.000301
6049	0.000272
6050	0.000253
6051	0.000262
6052	0.000267
6053	0.000242
6054	0.000207
6055	0.000181
6056	0.000147
6057	9.9e-05
6058	0.000125
6059	0.00016
6060	0.00015
6061	0.000126
6062	9.3e-05
6063	0.000103
6064	0.000109
6065	0.000132
6066	0.000101
6067	7.1e-05
6068	9.1e-05
6069	7.9e-05
6070	3.7e-05
6071	5e-06
6072	1.6e-05
6073	7.2e-05
6074	9.8e-05
6075	2.1e-05
6076	-4.2e-05
6077	-6.6e-05
6078	-5.6e-05
6079	-5e-06
6080	4.3e-05
6081	3.6e-05
6082	3.2e-05
6083	2.1e-05
6084	3e-05
6085	4.3e-05
6086	8.5e-05
6087	0.000122
6088	0.000159
6089	0.000182
6090	0.000204
6091	0.000208
6092	0.000199
6093	0.000156
6094	0.000144
6095	0.000173
6096	0.000193
6097	0.000212
6098	0.000232
6099	0.00024
6100	0.000247
6101	0.000267
6102	0.000285
6103	0.000255
6104	0.000229
6105	0.000205
6106	0.000208
6107	0.000159
6108	0.000139
6109	0.000146
6110	9.1e-05
6111	1.1e-05
6112	-2.9e-05
6113	-4.5e-05
6114	-9.8e-05
6115	-0.000123
6116	-0.000155
6117	-0.000138
6118	-0.000122
6119	-0.000111
6120	-0.000111
6121	-0.000117
6122	-0.000132
6123	-0.000147
6124	-0.000118
6125	-0.000124
6126	-0.000139
6127	-0.000165
6128	-0.000187
6129	-0.000181
6130	-0.000139
6131	-0.000127
6132	-0.00015
6133	-0.00015
6134	-0.000139
6135	-0.000116
6136	-8.8e-05
6137	-6.9e-05
6138	-6e-05
6139	-6.4e-05
6140	-5.3e-05
6141	-4.1e-05
6142	-4.2e-05
6143	-5.5e-05
6144	-9.2e-05
6145	-9.5e-05
6146	-6.8e-05
6147	-5e-05
6148	-6e-05
6149	-5.3e-05
6150	-6.6e-05
6151	-3.9e-05
6152	-3.7e-05
6153	-9e-06
6154	4e-05
6155	1.2e-05
6156	-2.8e-05
6157	-2.8e-05
6158	-1.5e-05
6159	-3e-05
6160	-1.8e-05
6161	-4e-05
6162	-5.5e-05
6163	-4e-05
6164	-4e-05
6165	-8.9e-05
6166	-0.000101
6167	-9.6e-05
6168	-9.8e-05
6169	-0.000111
6170	-8e-05
6171	-7.2e-05
6172	-7.4e-05
6173	-0.00011
6174	-0.000141
6175	-0.000138
6176	-0.000116
6177	-9.3e-05
6178	-5.8e-05
6179	-6.2e-05
6180	-6.4e-05
6181	-4.2e-05
6182	-4e-06
6183	2.1e-05
6184	-1.1e-05
6185	-4.4e-05
6186	-3.6e-05
6187	-1.5e-05
6188	-5.5e-05
6189	-0.000132
6190	-0.000125
6191	-5.4e-05
6192	1.2e-05
6193	5.2e-05
6194	2.5e-05
6195	-2.6e-05
6196	-4.9e-05
6197	-1.2e-05
6198	-1.9e-05
6199	-3.9e-05
6200	-4.5e-05
6201	-7.3e-05
6202	-9.2e-05
6203	-5e-05
6204	-2.5e-05
6205	-5.8e-05
6206	-7.5e-05
6207	-1.5e-05
6208	3.5e-05
6209	9e-06
6210	-3.7e-05
6211	-5.7e-05
6212	-3.8e-05
6213	-1.1e-05
6214	2.3e-05
6215	5.9e-05
6216	3.2e-05
6217	2.7e-05
6218	6.9e-05
6219	0.00013
6220	0.000152
6221	0.000104
6222	7.5e-05
6223	8.9e-05
6224	7.9e-05
6225	5.7e-05
6226	5.9e-05
6227	6.6e-05
6228	5e-05
6229	-1e-05
6230	-2.1e-05
6231	2.2e-05
6232	3.8e-05
6233	6.1e-05
6234	6e-05
6235	5.8e-05
6236	9.3e-05
6237	0.000124
6238	0.000116
6239	0
6240	0
6241	-2e-06
6242	1e-06
6243	4e-06
6244	-3.5e-05
6245	-5e-05
6246	-4.3e-05
6247	-3.3e-05
6248	-5.3e-05
6249	-3.5e-05
6250	1e-06
6251	4.6e-05
6252	8.4e-05
6253	7.7e-05
6254	7.2e-05
6255	0.000104
6256	0.000111
6257	3.5e-05
6258	9e-06
6259	4.1e-05
6260	6.9e-05
6261	7.4e-05
6262	7.1e-05
6263	5.4e-05
6264	4.9e-05
6265	7.9e-05
6266	6.8e-05
6267	5.6e-05
6268	0.000116
6269	0.000189
6270	0.000198
6271	0.000185
6272	0.000135
6273	0.000139
6274	0.000168
6275	0.000213
6276	0.000227
6277	0.000203
6278	0.000211
6279	0.00015
6280	0.000125
6281	0.000116
6282	0.00013
6283	0.000155
6284	0.000164
6285	0.000176
6286	0.000196
6287	0.000206
6288	0.000198
6289	0.00019
6290	0.000201
6291	0.000212
6292	0.000202
6293	0.000178
6294	0.000135
6295	0.000116
6296	0.000117
6297	0.00013
6298	0.000164
6299	0.000191
6300	0.000208
6301	0.000211
6302	0.000197
6303	0.000214
6304	0.000244
6305	0.000225
6306	0.000207
6307	0.000239
6308	0.000285
6309	0.00032
6310	0.000363
6311	0.000339
6312	0.000317
6313	0.000259
6314	0.000281
6315	0.000278
6316	0.000288
6317	0.000291
6318	0.000259
6319	0.000221
6320	0.000216
6321	0.000254
6322	0.00029
6323	0.000267
6324	0.000304
6325	0.000332
6326	0.000295
6327	0.000278
6328	0.000286
6329	0.000289
6330	0.000252
6331	0.000241
6332	0.000216
6333	0.000198
6334	0.000195
6335	0.00019
6336	0.000194
6337	0.000246
6338	0.000324
6339	0.000371
6340	0.000402
6341	0.000388
6342	0.000384
6343	0.00039
6344	0.000395
6345	0.000376
6346	0.000346
6347	0.000367
6348	0.0004
6349	0.000425
6350	0.000464
6351	0.000493
6352	0.000456
6353	0.000407
6354	0.000383
6355	0.000385
6356	0.000352
6357	0.000323
6358	0.000364
6359	0.000425
6360	0.000471
6361	0.000476
6362	0.00048
6363	0.0005
6364	0.000539
6365	0.000513
6366	0.000505
6367	0.000514
6368	0.000504
6369	0.000481
6370	0.000453
6371	0.000457
6372	0.000463
6373	0.000493
6374	0.000519
6375	0.000485
6376	0.000435
6377	0.000408
6378	0.000448
6379	0.000512
6380	0.000564
6381	0.000573
6382	0.000588
6383	0.000558
6384	0.000531
6385	0.000513
6386	0.000503
6387	0.000496
6388	0.000506
6389	0.000515
6390	0.000538
6391	0.000558
6392	0.00054
6393	0.000534
6394	0.000558
6395	0.000593
6396	0.000618
6397	0.000641
6398	0.00062
6399	0.000591
6400	0.000623
6401	0.00064
6402	0.000622
6403	0.000604
6404	0.000612
6405	0.000641
6406	0.000668
6407	0.000664
6408	0.000656
6409	0.000669
6410	0.000654
6411	0.000574
6412	0.000526
6413	0.000535
6414	0.000554
6415	0.000571
6416	0.000585
6417	0.000598
6418	0.000537
6419	0.000501
6420	0.00053
6421	0.000569
6422	0.00057
6423	0.000584
6424	0.0006
6425	0.00063
6426	0.00062
6427	0.00061
6428	0.000585
6429	0.000596
6430	0.00063
6431	0.00064
6432	0.000616
6433	0.000591
6434	0.000576
6435	0.000572
6436	0.000579
6437	0.00061
6438	0.000645
6439	0.000666
6440	0.000675
6441	0.000659
6442	0.000655
6443	0.000674
6444	0.000664
6445	0.000628
6446	0.000616
6447	0.000643
6448	0.000647
6449	0.000645
6450	0.000653
6451	0.000661
6452	0.000682
6453	0.00072
6454	0.000743
6455	0.000737
6456	0.00074
6457	0.000742
6458	0.000759
6459	0.000784
6460	0.000787
6461	0.00079
6462	0.000792
6463	0.000791
6464	0.000757
6465	0.000697
6466	0.00069
6467	0.000714
6468	0.000703
6469	0.000687
6470	0.000693
6471	0.00068
6472	0.000697
6473	0.000741
6474	0.000716
6475	0.00066
6476	0.00064
6477	0.000645
6478	0.000642
6479	0.000645
6480	0.000677
6481	0.00068
6482	0.000655
6483	0.000632
6484	0.000646
6485	0.000716
6486	0.000769
6487	0.000767
6488	0.000769
6489	0.000781
6490	0.000783
6491	0.000795
6492	0.000799
6493	0.00075
6494	0.000727
6495	0.000755
6496	0.00079
6497	0.000799
6498	0.000796
6499	0.000811
6500	0.000821
6501	0.00081
6502	0.000816
6503	0.000799
6504	0.000785
6505	0.000763
6506	0.000786
6507	0.000824
6508	0.00087
6509	0.000861
6510	0.000872
6511	0.000849
6512	0.000813
6513	0.000808
6514	0.000802
6515	0.000772
6516	0.000741
6517	0.00074
6518	0.00074
6519	0.000716
6520	0.000701
6521	0.000709
6522	0.000717
6523	0.000725
6524	0.000721
6525	0.000711
6526	0.000682
6527	0.000665
6528	0.000652
6529	0.000651
6530	0.00066
6531	0.00068
6532	0.000692
6533	0.000685
6534	0.000659
6535	0.000655
6536	0.000639
6537	0.000622
6538	0.00061
6539	0.000603
6540	0.000595
6541	0.000585
6542	0.000535
6543	0.000524
6544	0.000547
6545	0.000586
6546	0.00058
6547	0.00055
6548	0.000545
6549	0.000552
6550	0.000534
6551	0.000475
6552	0.000432
6553	0.00041
6554	0.000409
6555	0.000412
6556	0.000389
6557	0.000406
6558	0.000434
6559	0.000438
6560	0.000423
6561	0.000402
6562	0.000391
6563	0.000374
6564	0.000381
6565	0.000375
6566	0.000379
6567	0.000347
6568	0.000296
6569	0.000294
6570	0.000328
6571	0.00034
6572	0.000329
6573	0.000326
6574	0.000323
6575	0.00034
6576	0.000346
6577	0.000315
6578	0.000278
6579	0.000298
6580	0.000307
6581	0.000292
6582	0.000277
6583	0.000233
6584	0.000179
6585	0.000162
6586	0.000163
6587	0.000172
6588	0.000205
6589	0.00021
6590	0.000231
6591	0.000277
6592	0.000277
6593	0.000263
6594	0.000238
6595	0.000229
6596	0.000214
6597	0.000178
6598	0.000134
6599	0.000103
6600	0.000138
6601	0.000187
6602	0.000203
6603	0.000214
6604	0.000195
6605	0.000164
6606	0.000173
6607	0.000177
6608	0.000167
6609	0.000143
6610	0.000157
6611	0.000201
6612	0.000208
6613	0.00023
6614	0.000194
6615	0.000167
6616	0.000177
6617	0.000215
6618	0.000237
6619	0.000242
6620	0.000246
6621	0.000266
6622	0.000266
6623	0.000254
6624	0.000265
6625	0.000319
6626	0.000359
6627	0.00037
6628	0.000414
6629	0.000433
6630	0.000431
6631	0.000403
6632	0.000354
6633	0.000312
6634	0.000347
6635	0.000416
6636	0.000418
6637	0.000416
6638	0.000439
6639	0.000484
6640	0.000511
6641	0.000525
6642	0.00052
6643	0.000504
6644	0.000502
6645	0.000533
6646	0.000586
6647	0.000592
6648	0.000577
6649	0.000586
6650	0.000616
6651	0.000625
6652	0.000608
6653	0.000587
6654	0.000571
6655	0.000557
6656	0.000537
6657	0.000531
6658	0.000511
6659	0.000487
6660	0.0005
6661	0.000519
6662	0.000512
6663	0.000477
6664	0.000494
6665	0.000518
6666	0.00053
6667	0.000505
6668	0.000476
6669	0.000437
6670	0.00045
6671	0.000469
6672	0.000478
6673	0.000474
6674	0.000486
6675	0.00049
6676	0.000483
6677	0.00047
6678	0.000458
6679	0.000416
6680	0.000383
6681	0.000389
6682	0.000407
6683	0.000416
6684	0.000429
6685	0.000405
6686	0.000352
6687	0.000314
6688	0.000317
6689	0.000342
6690	0.000337
6691	0.000349
6692	0.000355
6693	0.000387
6694	0.000398
6695	0.000377
6696	0.00035
6697	0.000356
6698	0.000374
6699	0.000363
6700	0.000344
6701	0.000381
6702	0.00043
6703	0.000385
6704	0.000327
6705	0.000289
6706	0.000275
6707	0.000253
6708	0.00025
6709	0.000265
6710	0.00027
6711	0.000272
6712	0.000275
6713	0.000218
6714	0.000207
6715	0.000254
6716	0.000266
6717	0.000263
6718	0.000235
6719	0.00021
6720	0.000205
6721	0.000185
6722	0.000165
6723	0.000165
6724	0.000178
6725	0.000168
6726	0.000146
6727	0.00015
6728	0.000188
6729	0.000197
6730	0.000209
6731	0.000213
6732	0.000196
6733	0.000208
6734	0.000199
6735	0.000195
6736	0.00024
6737	0.000267
6738	0.000283
6739	0.000288
6740	0.000304
6741	0.000299
6742	0.00027
6743	0.00025
6744	0.000251
6745	0.000281
6746	0.00033
6747	0.000338
6748	0.000293
6749	0.000246
6750	0.000251
6751	0.000273
6752	0.000323
6753	0.000356
6754	0.000364
6755	0.000361
6756	0.000355
6757	0.000337
6758	0.000338
6759	0.000349
6760	0.000379
6761	0.000385
6762	0.00041
6763	0.000441
6764	0.000451
6765	0.000483
6766	0.000492
6767	0.000499
6768	0.000498
6769	0.00049
6770	0.000458
6771	0.00045
6772	0.000436
6773	0.000441
6774	0.000416
6775	0.00043
6776	0.000452
6777	0.000462
6778	0.000465
6779	0.000458
6780	0.000437
6781	0.000405
6782	0.000337
6783	0.000278
6784	0.000207
6785	0.00017
6786	0.000202
6787	0.000202
6788	0.000212
6789	0.000241
6790	0.000239
6791	0.000196
6792	0.000166
6793	0.000133
6794	0.000119
6795	0.000104
6796	8.8e-05
6797	7.9e-05
6798	5.9e-05
6799	5.1e-05
6800	3.1e-05
6801	-8e-06
6802	-5e-06
6803	3.4e-05
6804	3.8e-05
6805	3.3e-05
6806	5.1e-05
6807	8.5e-05
6808	9.8e-05
6809	0.000114
6810	0.000147
6811	0.000154
6812	0.00019
6813	0.000183
6814	0.000173
6815	0.00017
6816	0.000225
6817	0.000218
6818	0.000211
6819	0.000226
6820	0.000236
6821	0.000292
6822	0.000316
6823	0.00025
6824	0.000188
6825	0.00019
6826	0.000222
6827	0.000245
6828	0.000252
6829	0.000265
6830	0.000268
6831	0.000276
6832	0.000281
6833	0.000275
6834	0.00027
6835	0.000249
6836	0.000227
6837	0.000234
6838	0.000287
6839	0.000294
6840	0.000291
6841	0.000296
6842	0.000302
6843	0.000261
6844	0.000221
6845	0.00023
6846	0.000255
6847	0.000256
6848	0.000265
6849	0.000222
6850	0.000142
6851	0.000118
6852	0.000105
6853	0.000102
6854	0.000101
6855	0.000103
6856	0.000137
6857	0.000148
6858	0.000136
6859	0.000125
6860	0.000121
6861	0.000131
6862	0.000184
6863	0.000255
6864	0.000309
6865	0.000333
6866	0.000314
6867	0.000276
6868	0.000297
6869	0.000322
6870	0.000307
6871	0.000253
6872	0.000219
6873	0.000221
6874	0.000227
6875	0.000209
6876	0.000198
6877	0.000199
6878	0.000226
6879	0.000285
6880	0.000273
6881	0.000264
6882	0.000297
6883	0.00032
6884	0.000294
6885	0.000265
6886	0.000217
6887	0.000241
6888	0.000277
6889	0.000277
6890	0.000271
6891	0.000272
6892	0.00031
6893	0.000342
6894	0.00039
6895	0.000396
6896	0.000356
6897	0.000368
6898	0.000399
6899	0.000435
6900	0.000436
6901	0.000434
6902	0.000408
6903	0.000412
6904	0.000401
6905	0.000403
6906	0.000415
6907	0.000401
6908	0.000369
6909	0.000376
6910	0.000383
6911	0.000381
6912	0.000346
6913	0.000351
6914	0.000388
6915	0.000414
6916	0.000402
6917	0.000411
6918	0.000428
6919	0.000417
6920	0.000394
6921	0.000378
6922	0.000389
6923	0.000404
6924	0.000432
6925	0.000472
6926	0.000494
6927	0.000463
6928	0.000457
6929	0.000449
6930	0.000436
6931	0.00045
6932	0.000448
6933	0.000459
6934	0.000454
6935	0.000448
6936	0.000468
6937	0.000499
6938	0.000518
6939	0.000513
6940	0.00049
6941	0.000492
6942	0.000513
6943	0.000511
6944	0.000506
6945	0.000529
6946	0.00054
6947	0.000542
6948	0.000539
6949	0.000525
6950	0.000522
6951	0.000504
6952	0.000482
6953	0.000499
6954	0.000518
6955	0.000525
6956	0.000493
6957	0.000489
6958	0.000507
6959	0.000527
6960	0.00049
6961	0.000427
6962	0.000397
6963	0.0004
6964	0.000431
6965	0.000437
6966	0.000447
6967	0.000445
6968	0.000414
6969	0.00041
6970	0.000394
6971	0.000377
6972	0.000395
6973	0.000369
6974	0.000346
6975	0.000357
6976	0.000408
6977	0.000403
6978	0.000394
6979	0.000392
6980	0.000407
6981	0.000426
6982	0.000441
6983	0.000431
6984	0.000429
6985	0.000452
6986	0.000467
6987	0.000463
6988	0.000458
6989	0.000462
6990	0.000465
6991	0.000476
6992	0.00046
6993	0.000427
6994	0.000439
6995	0.000429
6996	0.000411
6997	0.000411
6998	0.000435
6999	0.000441
7000	0.000436
7001	0.000448
7002	0.000512
7003	0.000541
7004	0.000566
7005	0.000608
7006	0.000598
7007	0.000567
7008	0.000536
7009	0.00053
7010	0.000529
7011	0.000548
7012	0.000567
7013	0.000551
7014	0.000554
7015	0.000521
7016	0.000532
7017	0.000588
7018	0.0006
7019	0.000575
7020	0.000582
7021	0.000596
7022	0.000619
7023	0.000611
7024	0.000616
7025	0.000618
7026	0.000623
7027	0.00063
7028	0.000656
7029	0.000656
7030	0.000611
7031	0.000565
7032	0.000542
7033	0.000522
7034	0.000564
7035	0.000607
7036	0.000605
7037	0.00057
7038	0.000592
7039	0.000622
7040	0.00063
7041	0.000637
7042	0.000632
7043	0.000608
7044	0.000599
7045	0.000617
7046	0.000608
7047	0.00056
7048	0.000556
7049	0.000593
7050	0.000609
7051	0.000593
7052	0.000586
7053	0.000563
7054	0.000527
7055	0.000516
7056	0.000515
7057	0.000543
7058	0.000572
7059	0.00059
7060	0.000591
7061	0.000564
7062	0.000502
7063	0.000441
7064	0.000406
7065	0.000414
7066	0.000458
7067	0.000505
7068	0.00049
7069	0.000499
7070	0.000532
7071	0.00052
7072	0.000473
7073	0.000432
7074	0.000416
7075	0.000428
7076	0.00045
7077	0.000471
7078	0.000456
7079	0.000447
7080	0.000449
7081	0.000418
7082	0.000411
7083	0.000426
7084	0.000415
7085	0.000376
7086	0.000372
7087	0.00037
7088	0.000368
7089	0.000359
7090	0.000365
7091	0.000413
7092	0.000469
7093	0.000483
7094	0.000478
7095	0.000443
7096	0.00042
7097	0.000424
7098	0.000417
7099	0.000422
7100	0.000448
7101	0.000486
7102	0.000487
7103	0.000452
7104	0.00039
7105	0.000364
7106	0.000357
7107	0.000365
7108	0.000404
7109	0.000431
7110	0.000416
7111	0.000358
7112	0.000325
7113	0.000301
7114	0.000297
7115	0.000284
7116	0.000256
7117	0.000271
7118	0.000324
7119	0.000369
7120	0.000395
7121	0.000366
7122	0.000325
7123	0.000301
7124	0.000327
7125	0.000339
7126	0.00032
7127	0.000285
7128	0.000278
7129	0.000319
7130	0.000317
7131	0.000276
7132	0.00028
7133	0.000313
7134	0.00035
7135	0.000364
7136	0.000377
7137	0.000386
7138	0.00038
7139	0.000359
7140	0.000353
7141	0.000326
7142	0.000279
7143	0.000259
7144	0.000271
7145	0.00028
7146	0.000283
7147	0.000317
7148	0.000338
7149	0.000353
7150	0.000363
7151	0.000373
7152	0.000421
7153	0.000449
7154	0.000446
7155	0.00039
7156	0.000339
7157	0.000348
7158	0.000348
7159	0.000348
7160	0.000364
7161	0.000403
7162	0.000399
7163	0.000387
7164	0.000382
7165	0.000417
7166	0.000406
7167	0.000398
7168	0.000386
7169	0.000396
7170	0.000426
7171	0.000457
7172	0.000495
7173	0.000519
7174	0.000537
7175	0.000518
7176	0.000504
7177	0.000506
7178	0.000501
7179	0.000507
7180	0.000492
7181	0.000496
7182	0.000501
7183	0.000503
7184	0.000501
7185	0.0005
7186	0.000511
7187	0.000515
7188	0.000505
7189	0.000532
7190	0.000582
7191	0.000656
7192	0.000695
7193	0.000708
7194	0.000719
7195	0.000723
7196	0.000682
7197	0.000658
7198	0.000638
7199	0.000654
7200	0.000671
7201	0.000688
7202	0.000682
7203	0.000697
7204	0.000745
7205	0.000739
7206	0.000736
7207	0.000694
7208	0.000659
7209	0.000644
7210	0.000669
7211	0.000697
7212	0.000672
7213	0.000629
7214	0.000588
7215	0.000582
7216	0.00061
7217	0.000626
7218	0.000615
7219	0.000613
7220	0.000595
7221	0.000584
7222	0.000574
7223	0.000559
7224	0.000555
7225	0.000549
7226	0.000585
7227	0.000608
7228	0.000609
7229	0.000594
7230	0.000592
7231	0.000621
7232	0.000645
7233	0.000659
7234	0.000649
7235	0.000638
7236	0.000613
7237	0.000603
7238	0.000617
7239	0.00061
7240	0.000631
7241	0.00063
7242	0.0006
7243	0.00055
7244	0.000572
7245	0.00058
7246	0.000564
7247	0.000563
7248	0.000582
7249	0.000584
7250	0.000606
7251	0.000633
7252	0.00066
7253	0.000674
7254	0.0007
7255	0.000709
7256	0.000681
7257	0.000662
7258	0.000626
7259	0.000575
7260	0.000529
7261	0.00051
7262	0.00052
7263	0.00053
7264	0.000516
7265	0.000469
7266	0.000422
7267	0.000378
7268	0.000343
7269	0.000311
7270	0.000277
7271	0.00024
7272	0.000222
7273	0.000202
7274	0.000193
7275	0.000195
7276	0.000216
7277	0.000246
7278	0.000261
7279	0.000264
7280	0.000263
7281	0.000212
7282	0.000158
7283	0.000169
7284	0.000184
7285	0.000164
7286	0.000129
7287	0.000122
7288	0.00012
7289	7.7e-05
7290	4.4e-05
7291	4.5e-05
7292	5.2e-05
7293	4.6e-05
7294	2.1e-05
7295	3.3e-05
7296	6.2e-05
7297	7.6e-05
7298	0.000111
7299	0.000151
7300	0.000159
7301	0.000143
7302	0.000141
7303	0.000118
7304	0.000102
7305	0.000104
7306	9.2e-05
7307	8.1e-05
7308	8.2e-05
7309	8.7e-05
7310	5.3e-05
7311	2.6e-05
7312	3.6e-05
7313	4.9e-05
7314	5.3e-05
7315	4.2e-05
7316	4.9e-05
7317	5.2e-05
7318	4.3e-05
7319	4.7e-05
7320	5.3e-05
7321	7.1e-05
7322	0.000101
7323	0.000106
7324	0.00014
7325	0.00021
7326	0.000246
7327	0.000235
7328	0.000223
7329	0.000193
7330	0.000147
7331	0.000131
7332	0.000147
7333	0.000185
7334	0.000242
7335	0.000291
7336	0.000321
7337	0.000365
7338	0.000369
7339	0.000358
7340	0.000358
7341	0.000425
7342	0.00046
7343	0.000461
7344	0.000445
7345	0.000402
7346	0.00042
7347	0.000467
7348	0.000503
7349	0.000528
7350	0.000527
7351	0.000509
7352	0.00052
7353	0.000519
7354	0.000499
7355	0.000486
7356	0.000484
7357	0.000484
7358	0.000518
7359	0.000534
7360	0.000547
7361	0.000593
7362	0.000615
7363	0.0006
7364	0.000597
7365	0.000596
7366	0.000572
7367	0.000572
7368	0.000575
7369	0.000563
7370	0.000499
7371	0.000459
7372	0.00046
7373	0.000518
7374	0.000557
7375	0.000576
7376	0.000568
7377	0.00057
7378	0.000547
7379	0.000495
7380	0.000446
7381	0.000427
7382	0.000436
7383	0.000462
7384	0.000523
7385	0.000557
7386	0.000573
7387	0.000546
7388	0.000518
7389	0.000521
7390	0.000526
7391	0.000539
7392	0.000536
7393	0.000514
7394	0.000497
7395	0.00049
7396	0.000475
7397	0.000519
7398	0.000555
7399	0.000515
7400	0.000469
7401	0.000446
7402	0.000446
7403	0.000451
7404	0.000454
7405	0.000461
7406	0.000434
7407	0.000426
7408	0.00046
7409	0.00047
7410	0.00047
7411	0.000471
7412	0.000465
7413	0.000469
7414	0.000478
7415	0.000435
7416	0.000409
7417	0.000416
7418	0.000391
7419	0.000381
7420	0.000402
7421	0.000414
7422	0.000434
7423	0.000451
7424	0.000452
7425	0.000452
7426	0.000448
7427	0.000454
7428	0.000468
7429	0.000479
7430	0.000478
7431	0.000502
7432	0.000539
7433	0.00051
7434	0.000476
7435	0.000481
7436	0.000496
7437	0.000501
7438	0.000493
7439	0.000483
7440	0.000483
7441	0.000469
7442	0.000464
7443	0.0005
7444	0.000528
7445	0.000518
7446	0.000492
7447	0.000491
7448	0.000476
7449	0.000495
7450	0.00052
7451	0.000526
7452	0.000468
7453	0.000428
7454	0.000438
7455	0.000447
7456	0.000417
7457	0.000355
7458	0.000332
7459	0.00032
7460	0.000315
7461	0.000306
7462	0.000321
7463	0.000338
7464	0.000351
7465	0.000363
7466	0.000355
7467	0.000356
7468	0.000341
7469	0.000312
7470	0.000278
7471	0.000287
7472	0.000305
7473	0.000339
7474	0.000332
7475	0.000342
7476	0.000366
7477	0.000346
7478	0.000299
7479	0.000248
7480	0.000258
7481	0.000295
7482	0.000316
7483	0.000322
7484	0.000283
7485	0.000257
7486	0.000266
7487	0.000262
7488	0.000249
7489	0.000262
7490	0.000296
7491	0.000337
7492	0.000365
7493	0.000382
7494	0.000364
7495	0.000325
7496	0.000293
7497	0.000267
7498	0.000209
7499	0.000168
7500	0.00018
7501	0.000187
7502	0.000212
7503	0.000193
7504	0.000174
7505	0.000114
7506	6.5e-05
7507	4.9e-05
7508	6.1e-05
7509	6.5e-05
7510	7.4e-05
7511	8.3e-05
7512	9.3e-05
7513	0.000112
7514	8.6e-05
7515	6.6e-05
7516	6e-05
7517	4.5e-05
7518	2.9e-05
7519	3.6e-05
7520	1.3e-05
7521	2e-06
7522	3e-05
7523	7e-05
7524	9e-05
7525	0.000101
7526	0.000107
7527	0.000107
7528	7.7e-05
7529	4e-05
7530	5.2e-05
7531	0.000111
7532	0.00017
7533	0.000186
7534	0.000187
7535	0.000191
7536	0.000218
7537	0.000239
7538	0.000241
7539	0.000229
7540	0.000239
7541	0.00028
7542	0.000299
7543	0.00027
7544	0.000261
7545	0.000235
7546	0.000245
7547	0.000225
7548	0.000222
7549	0.000227
7550	0.000267
7551	0.000264
7552	0.00025
7553	0.000268
7554	0.00028
7555	0.000273
7556	0.000288
7557	0.000282
7558	0.00023
7559	0.000189
7560	0.000187
7561	0.00021
7562	0.000235
7563	0.000248
7564	0.000284
7565	0.000269
7566	0.000249
7567	0.000216
7568	0.000205
7569	0.000237
7570	0.00026
7571	0.000277
7572	0.000275
7573	0.000248
7574	0.000226
7575	0.000248
7576	0.000261
7577	0.000268
7578	0.000265
7579	0.00024
7580	0.000237
7581	0.000245
7582	0.00025
7583	0.000216
7584	0.000187
7585	0.000209
7586	0.000214
7587	0.000211
7588	0.000229
7589	0.000236
7590	0.000216
7591	0.000213
7592	0.000232
7593	0.000288
7594	0.000323
7595	0.000314
7596	0.000299
7597	0.000285
7598	0.000298
7599	0.000345
7600	0.000353
7601	0.000323
7602	0.000304
7603	0.000323
7604	0.000355
7605	0.000356
7606	0.000326
7607	0.000342
7608	0.000364
7609	0.000374
7610	0.000368
7611	0.00038
7612	0.000348
7613	0.000319
7614	0.00032
7615	0.000308
7616	0.000306
7617	0.000321
7618	0.000352
7619	0.000361
7620	0.000369
7621	0.000346
7622	0.00031
7623	0.000319
7624	0.000342
7625	0.000347
7626	0.00035
7627	0.000332
7628	0.000324
7629	0.000332
7630	0.000348
7631	0.00036
7632	0.000387
7633	0.00039
7634	0.000403
7635	0.000422
7636	0.0004
7637	0.000351
7638	0.000329
7639	0.000313
7640	0.00032
7641	0.000358
7642	0.000385
7643	0.000416
7644	0.000453
7645	0.000462
7646	0.00043
7647	0.000414
7648	0.000405
7649	0.000445
7650	0.000469
7651	0.000463
7652	0.00043
7653	0.000418
7654	0.000408
7655	0.000417
7656	0.000424
7657	0.000426
7658	0.000424
7659	0.000416
7660	0.000396
7661	0.000378
7662	0.000397
7663	0.000404
7664	0.000411
7665	0.000434
7666	0.000437
7667	0.000429
7668	0.000417
7669	0.000407
7670	0.00042
7671	0.000386
7672	0.00035
7673	0.000321
7674	0.000355
7675	0.000379
7676	0.000376
7677	0.00037
7678	0.000383
7679	0.00038
7680	0.00037
7681	0.000382
7682	0.000371
7683	0.000337
7684	0.000301
7685	0.000275
7686	0.00025
7687	0.000233
7688	0.000217
7689	0.000207
7690	0.000218
7691	0.000178
7692	0.00017
7693	0.000153
7694	0.000166
7695	0.000161
7696	0.00018
7697	0.000177
7698	0.000148
7699	0.000143
7700	0.000154
7701	0.000142
7702	0.000139
7703	0.000163
7704	0.000189
7705	0.000184
7706	0.0002
7707	0.000231
7708	0.000237
7709	0.000246
7710	0.000232
7711	0.000191
7712	0.00016
7713	0.000128
7714	0.000117
7715	0.000139
7716	0.000142
7717	0.000116
7718	0.000106
7719	0.000139
7720	0.000149
7721	0.000182
7722	0.000204
7723	0.000197
7724	0.000155
7725	0.000126
7726	0.000121
7727	0.000175
7728	0.000183
7729	0.000198
7730	0.000189
7731	0.000226
7732	0.000234
7733	0.000239
7734	0.00022
7735	0.000235
7736	0.000237
7737	0.000246
7738	0.000253
7739	0.000263
7740	0.000258
7741	0.000212
7742	0.000209
7743	0.000246
7744	0.000274
7745	0.000286
7746	0.000323
7747	0.000346
7748	0.000337
7749	0.000364
7750	0.000427
7751	0.000444
7752	0.000401
7753	0.000351
7754	0.000366
7755	0.000377
7756	0.000406
7757	0.000432
7758	0.000426
7759	0.000404
7760	0.000387
7761	0.000375
7762	0.0004
7763	0.000428
7764	0.000466
7765	0.000495
7766	0.000501
7767	0.000529
7768	0.000575
7769	0.000528
7770	0.000491
7771	0.000468
7772	0.000446
7773	0.000455
7774	0.000501
7775	0.000457
7776	0.000411
7777	0.000393
7778	0.000409
7779	0.000436
7780	0.00046
7781	0.000468
7782	0.00047
7783	0.00041
7784	0.000355
7785	0.000362
7786	0.000372
7787	0.000361
7788	0.000357
7789	0.000358
7790	0.000361
7791	0.000348
7792	0.000313
7793	0.000292
7794	0.000288
7795	0.000348
7796	0.000389
7797	0.000393
7798	0.00035
7799	0.00031
7800	0.00028
7801	0.000274
7802	0.000266
7803	0.000294
7804	0.000297
7805	0.0003
7806	0.000318
7807	0.000334
7808	0.000327
7809	0.000301
7810	0.000298
7811	0.000334
7812	0.000372
7813	0.000397
7814	0.000374
7815	0.000334
7816	0.000289
7817	0.000277
7818	0.000319
7819	0.000401
7820	0.000426
7821	0.000408
7822	0.000399
7823	0.000398
7824	0.000414
7825	0.00043
7826	0.000417
7827	0.000417
7828	0.000448
7829	0.000456
7830	0.00044
7831	0.000415
7832	0.000445
7833	0.000455
7834	0.000418
7835	0.000377
7836	0.000366
7837	0.000396
7838	0.000414
7839	0.000389
7840	0.000377
7841	0.000366
7842	0.000341
7843	0.000348
7844	0.000382
7845	0.000432
7846	0.000451
7847	0.000442
7848	0.000429
7849	0.000416
7850	0.000407
7851	0.000389
7852	0.000351
7853	0.000335
7854	0.000391
7855	0.000453
7856	0.000483
7857	0.000501
7858	0.000487
7859	0.000472
7860	0.000469
7861	0.000468
7862	0.000431
7863	0.000417
7864	0.000431
7865	0.000443
7866	0.00047
7867	0.00051
7868	0.000507
7869	0.000507
7870	0.000533
7871	0.00057
7872	0.000563
7873	0.000545
7874	0.000527
7875	0.000534
7876	0.000543
7877	0.000558
7878	0.00055
7879	0.000559
7880	0.000583
7881	0.000595
7882	0.000612
7883	0.000603
7884	0.000624
7885	0.000629
7886	0.000639
7887	0.000671
7888	0.000725
7889	0.000764
7890	0.000784
7891	0.000806
7892	0.000822
7893	0.000818
7894	0.000746
7895	0.000705
7896	0.000685
7897	0.000706
7898	0.000685
7899	0.000691
7900	0.000722
7901	0.000732
7902	0.000753
7903	0.000781
7904	0.000797
7905	0.000792
7906	0.000775
7907	0.000771
7908	0.000771
7909	0.000776
7910	0.000838
7911	0.000864
7912	0.000825
7913	0.00077
7914	0.000772
7915	0.000786
7916	0.000813
7917	0.000799
7918	0.000804
7919	0.000784
7920	0.000754
7921	0.000751
7922	0.000811
7923	0.000812
7924	0.000792
7925	0.000805
7926	0.000836
7927	0.000875
7928	0.000861
7929	0.000827
7930	0.00081
7931	0.000791
7932	0.000776
7933	0.000776
7934	0.000777
7935	0.000736
7936	0.000706
7937	0.000733
7938	0.000771
7939	0.000785
7940	0.000818
7941	0.000838
7942	0.000774
7943	0.000717
7944	0.000672
7945	0.000628
7946	0.000558
7947	0.000533
7948	0.000548
7949	0.000571
7950	0.000553
7951	0.00049
7952	0.000435
7953	0.000448
7954	0.000498
7955	0.000527
7956	0.000564
7957	0.000551
7958	0.000518
7959	0.000477
7960	0.000498
7961	0.000513
7962	0.000544
7963	0.000536
7964	0.000502
7965	0.000476
7966	0.00045
7967	0.000456
7968	0.0005
7969	0.000535
7970	0.000527
7971	0.000526
7972	0.000549
7973	0.00057
7974	0.000589
7975	0.000607
7976	0.000575
7977	0.000522
7978	0.000563
7979	0.000607
7980	0.000656
7981	0.000699
7982	0.000711
7983	0.000699
7984	0.000665
7985	0.000661
7986	0.000678
7987	0.000661
7988	0.000644
7989	0.000659
7990	0.000671
7991	0.00066
7992	0.000668
7993	0.000673
7994	0.000667
7995	0.000653
7996	0.000688
7997	0.000713
7998	0.000715
[truncated: 3,401 more rows]

## Sheet: P354dC
Time	UV
6000	0.002095
6001	0.002149
6002	0.002173
6003	0.002152
6004	0.002158
6005	0.002122
6006	0.002086
6007	0.002086
6008	0.002163
6009	0.002201
6010	0.002233
6011	0.002248
6012	0.00225
6013	0.002246
6014	0.00223
6015	0.002222
6016	0.002238
6017	0.002263
6018	0.002169
6019	0.002094
6020	0.002117
6021	0.002158
6022	0.00218
6023	0.002146
6024	0.002112
6025	0.002163
6026	0.002175
6027	0.002163
6028	0.002207
6029	0.002178
6030	0.0021
6031	0.00204
6032	0.002078
6033	0.002138
6034	0.002139
6035	0.002132
6036	0.002139
6037	0.002183
6038	0.002188
6039	0.002211
6040	0.002177
6041	0.002143
6042	0.002104
6043	0.00209
6044	0.002075
6045	0.002089
6046	0.002107
6047	0.002115
6048	0.002144
6049	0.002161
6050	0.002179
6051	0.002152
6052	0.002159
6053	0.002124
6054	0.002081
6055	0.002097
6056	0.002115
6057	0.002106
6058	0.002079
6059	0.002052
6060	0.002088
6061	0.002131
6062	0.002092
6063	0.001981
6064	0.00198
6065	0.002061
6066	0.002062
6067	0.002007
6068	0.001972
6069	0.001982
6070	0.002041
6071	0.002036
6072	0.002039
6073	0.002154
6074	0.002226
6075	0.002248
6076	0.002246
6077	0.002241
6078	0.002249
6079	0.002251
6080	0.002189
6081	0.002137
6082	0.002154
6083	0.002144
6084	0.002109
6085	0.002127
6086	0.002121
6087	0.002092
6088	0.0021
6089	0.002124
6090	0.002089
6091	0.001989
6092	0.001981
6093	0.002127
6094	0.002216
6095	0.002227
6096	0.002236
6097	0.002213
6098	0.00217
6099	0.002178
6100	0.002195
6101	0.002181
6102	0.002163
6103	0.002095
6104	0.00201
6105	0.002
6106	0.002047
6107	0.002085
6108	0.002124
6109	0.002152
6110	0.002173
6111	0.00216
6112	0.002156
6113	0.002193
6114	0.002176
6115	0.002138
6116	0.002127
6117	0.00218
6118	0.002255
6119	0.002264
6120	0.002208
6121	0.002179
6122	0.002203
6123	0.002224
6124	0.002243
6125	0.002326
6126	0.002331
6127	0.002291
6128	0.002264
6129	0.002275
6130	0.00226
6131	0.002233
6132	0.00223
6133	0.002263
6134	0.002278
6135	0.002218
6136	0.002195
6137	0.002198
6138	0.002212
6139	0.00221
6140	0.002288
6141	0.002272
6142	0.002204
6143	0.002186
6144	0.002241
6145	0.00231
6146	0.002326
6147	0.002336
6148	0.002317
6149	0.002289
6150	0.002262
6151	0.002246
6152	0.002228
6153	0.002216
6154	0.002221
6155	0.00221
6156	0.00221
6157	0.002254
6158	0.002248
6159	0.002205
6160	0.002181
6161	0.002202
6162	0.002244
6163	0.002246
6164	0.002202
6165	0.002232
6166	0.002293
6167	0.002276
6168	0.002176
6169	0.002189
6170	0.002225
6171	0.002247
6172	0.002196
6173	0.002151
6174	0.002188
6175	0.002231
6176	0.002254
6177	0.002295
6178	0.002303
6179	0.002264
6180	0.0022
6181	0.002202
6182	0.002251
6183	0.002251
6184	0.002254
6185	0.002246
6186	0.002263
6187	0.002249
6188	0.002261
6189	0.002302
6190	0.002343
6191	0.002357
6192	0.002337
6193	0.002285
6194	0.002263
6195	0.002236
6196	0.002184
6197	0.002199
6198	0.002218
6199	0.002195
6200	0.002186
6201	0.002231
6202	0.002239
6203	0.002248
6204	0.002279
6205	0.00229
6206	0.002247
6207	0.002235
6208	0.002267
6209	0.002302
6210	0.002304
6211	0.002317
6212	0.002323
6213	0.002327
6214	0.002324
6215	0.00229
6216	0.002274
6217	0.002295
6218	0.002316
6219	0.002313
6220	0.002268
6221	0.002182
6222	0.002112
6223	0.002137
6224	0.002177
6225	0.002205
6226	0.002225
6227	0.002234
6228	0.002209
6229	0.002191
6230	0.00222
6231	0.002319
6232	0.002403
6233	0.0024
6234	0.002343
6235	0.002285
6236	0.002248
6237	0.002248
6238	0.002222
6239	0
6240	0
6241	-4e-06
6242	-1.6e-05
6243	-4.8e-05
6244	-0.000102
6245	-0.000107
6246	-5.9e-05
6247	1e-06
6248	2.6e-05
6249	5.5e-05
6250	0.000112
6251	0.000115
6252	5.4e-05
6253	2.2e-05
6254	1.9e-05
6255	2.8e-05
6256	3.9e-05
6257	1.6e-05
6258	-3.1e-05
6259	-4.4e-05
6260	-1.5e-05
6261	-1e-06
6262	4e-06
6263	2e-05
6264	2e-06
6265	-1.8e-05
6266	-5.7e-05
6267	-8.8e-05
6268	-7.9e-05
6269	-5.7e-05
6270	-4.1e-05
6271	-5.1e-05
6272	-9.4e-05
6273	-0.00015
6274	-0.00016
6275	-0.000162
6276	-0.000133
6277	-8.6e-05
6278	-2.4e-05
6279	-1.7e-05
6280	-5.9e-05
6281	-0.000119
6282	-0.000132
6283	-0.000108
6284	-6.6e-05
6285	-6.3e-05
6286	-0.000127
6287	-0.000226
6288	-0.000241
6289	-0.000142
6290	-3.2e-05
6291	-4.2e-05
6292	-0.000121
6293	-0.000137
6294	-0.000105
6295	-6.3e-05
6296	-3.7e-05
6297	-2.8e-05
6298	-8e-05
6299	-0.000111
6300	-0.000106
6301	-5.2e-05
6302	-3.6e-05
6303	-5.5e-05
6304	-0.00011
6305	-0.000131
6306	-0.000125
6307	-0.000107
6308	-5.4e-05
6309	-3.1e-05
6310	-3.8e-05
6311	-8.6e-05
6312	-0.000152
6313	-0.00012
6314	-8.5e-05
6315	-7.8e-05
6316	-4.6e-05
6317	-4.7e-05
6318	-9.7e-05
6319	-7.5e-05
6320	-2e-05
6321	-4.7e-05
6322	-7e-05
6323	-5.4e-05
6324	-5.7e-05
6325	-8.6e-05
6326	-8.5e-05
6327	-5.5e-05
6328	-1.5e-05
6329	-3.1e-05
6330	-6.3e-05
6331	-9.3e-05
6332	-0.000217
6333	-0.000297
6334	-0.00031
6335	-0.00033
6336	-0.00029
6337	-0.00016
6338	-8.4e-05
6339	-3.5e-05
6340	2.2e-05
6341	-1e-06
6342	-3.4e-05
6343	4e-06
6344	2.7e-05
6345	3e-06
6346	-2.4e-05
6347	-4.3e-05
6348	-4.6e-05
6349	-1.5e-05
6350	-7e-06
6351	-6e-05
6352	-0.000129
6353	-0.000144
6354	-0.000145
6355	-9.2e-05
6356	-2.3e-05
6357	5e-06
6358	-9.3e-05
6359	-0.000145
6360	-0.000158
6361	-0.000142
6362	-0.000104
6363	-9e-06
6364	2e-06
6365	-9.1e-05
6366	-0.000151
6367	-0.000122
6368	-0.000106
6369	-0.000129
6370	-0.000162
6371	-0.0002
6372	-0.000159
6373	-0.000106
6374	-0.000117
6375	-0.000163
6376	-0.000174
6377	-0.000126
6378	-8.3e-05
6379	-6.9e-05
6380	-8e-05
6381	-9.1e-05
6382	-4.2e-05
6383	-1e-06
6384	2.1e-05
6385	-3.3e-05
6386	-7.8e-05
6387	-9.4e-05
6388	-7.3e-05
6389	-4.8e-05
6390	2.8e-05
6391	7.1e-05
6392	4.6e-05
6393	-3.1e-05
6394	-5.4e-05
6395	-2.2e-05
6396	3.7e-05
6397	1.9e-05
6398	-2.7e-05
6399	-5.4e-05
6400	-4.4e-05
6401	3e-06
6402	6e-06
6403	-9e-06
6404	-4.3e-05
6405	-3.9e-05
6406	-3e-05
6407	-5.4e-05
6408	-5.8e-05
6409	-4.9e-05
6410	-2.1e-05
6411	2.7e-05
6412	2.7e-05
6413	3.5e-05
6414	1.2e-05
6415	-1.8e-05
6416	-5.9e-05
6417	-9.7e-05
6418	-0.000127
6419	-0.000116
6420	-8.2e-05
6421	-2.8e-05
6422	-4.8e-05
6423	-7.5e-05
6424	-0.000101
6425	-0.000124
6426	-0.000169
6427	-0.000116
6428	-5.3e-05
6429	-2.4e-05
6430	-5.8e-05
6431	-6.3e-05
6432	-7.9e-05
6433	-5.9e-05
6434	-9.6e-05
6435	-8.3e-05
6436	-5.2e-05
6437	-7.2e-05
6438	-8.8e-05
6439	-4e-05
6440	1.6e-05
6441	2.4e-05
6442	3e-06
6443	-4.2e-05
6444	-8.4e-05
6445	-0.000153
6446	-0.000196
6447	-0.000153
6448	-9.4e-05
6449	-5.5e-05
6450	-4e-05
6451	4e-06
6452	-2.3e-05
6453	-3.9e-05
6454	-1e-06
6455	5e-05
6456	7.9e-05
6457	1.5e-05
6458	-5.8e-05
6459	-0.000155
6460	-0.00014
6461	-7.7e-05
6462	-6.4e-05
6463	-4.8e-05
6464	-5.1e-05
6465	2.9e-05
6466	4.5e-05
6467	1.1e-05
6468	-3.2e-05
6469	8e-06
6470	5.2e-05
6471	7.4e-05
6472	8.5e-05
6473	7.7e-05
6474	3.3e-05
6475	-1.8e-05
6476	-3.7e-05
6477	-3.8e-05
6478	-1.7e-05
6479	1.1e-05
6480	-7e-06
6481	-5.2e-05
6482	-8.8e-05
6483	-0.000126
6484	-0.000118
6485	-7.6e-05
6486	-5.7e-05
6487	-6.6e-05
6488	-7.5e-05
6489	-8.8e-05
6490	-9.7e-05
6491	-0.000112
6492	-0.000106
6493	-7e-05
6494	-6e-06
6495	5e-05
6496	8.2e-05
6497	5.9e-05
6498	-3.4e-05
6499	-8.9e-05
6500	-8e-05
6501	-3.4e-05
6502	-2.9e-05
6503	-3e-05
6504	-2.1e-05
6505	-1.6e-05
6506	-2.6e-05
6507	-9.4e-05
6508	-9.6e-05
6509	-4.1e-05
6510	4e-06
6511	-3e-06
6512	6e-06
6513	2.7e-05
6514	1.5e-05
6515	-4.1e-05
6516	-3.5e-05
6517	3e-05
6518	8.2e-05
6519	6.9e-05
6520	5.2e-05
6521	7e-06
6522	2.1e-05
6523	7.3e-05
6524	0.000119
6525	0.000146
6526	0.000125
6527	8.3e-05
6528	4e-05
6529	3.9e-05
6530	7.1e-05
6531	6.6e-05
6532	2.5e-05
6533	-2.7e-05
6534	-8.4e-05
6535	-9.2e-05
6536	-8.3e-05
6537	-8.7e-05
6538	-6.8e-05
6539	-5.7e-05
6540	-0.000106
6541	-0.000174
6542	-0.000173
6543	-0.000149
6544	-0.000102
6545	-5.1e-05
6546	-3.7e-05
6547	-0.000117
6548	-0.000212
6549	-0.000195
6550	-0.000138
6551	-0.000187
6552	-0.000251
6553	-0.00024
6554	-0.000129
6555	-5e-05
6556	-6.2e-05
6557	-8.5e-05
6558	-6.6e-05
6559	-4.8e-05
6560	-5e-05
6561	-7.3e-05
6562	-0.00014
6563	-0.00019
6564	-0.000134
6565	-4.7e-05
6566	-2e-05
6567	-9.8e-05
6568	-0.000145
6569	-9.4e-05
6570	-6.5e-05
6571	-2.2e-05
6572	-1.8e-05
6573	-5.8e-05
6574	-0.000138
6575	-0.000158
6576	-0.000154
6577	-0.000132
6578	-0.000111
6579	-8.5e-05
6580	-9.9e-05
6581	-9.3e-05
6582	-9.4e-05
6583	-0.00013
6584	-0.000103
6585	-7e-05
6586	-0.000112
6587	-0.000171
6588	-0.000186
6589	-0.000193
6590	-0.000191
6591	-0.000154
6592	-0.000145
6593	-0.000126
6594	-0.00015
6595	-0.000188
6596	-0.000197
6597	-0.000153
6598	-0.00014
6599	-0.000161
6600	-0.000223
6601	-0.000265
6602	-0.000263
6603	-0.000279
6604	-0.000266
6605	-0.000255
6606	-0.000223
6607	-0.000212
6608	-0.000221
6609	-0.000241
6610	-0.000244
6611	-0.00029
6612	-0.000296
6613	-0.000245
6614	-0.000124
6615	-8.5e-05
6616	-0.000128
6617	-0.000185
6618	-0.000199
6619	-0.000192
6620	-0.000185
6621	-0.000197
6622	-0.000219
6623	-0.000238
6624	-0.000226
6625	-0.000199
6626	-0.000241
6627	-0.000284
6628	-0.000254
6629	-0.0002
6630	-0.000221
6631	-0.000217
6632	-0.000193
6633	-0.000175
6634	-0.000172
6635	-0.00018
6636	-0.000214
6637	-0.0003
6638	-0.000287
6639	-0.000266
6640	-0.000245
6641	-0.000222
6642	-0.000232
6643	-0.0003
6644	-0.000287
6645	-0.000271
6646	-0.000228
6647	-0.000232
6648	-0.000213
6649	-0.000243
6650	-0.000245
6651	-0.000268
6652	-0.000292
6653	-0.000322
6654	-0.00037
6655	-0.000366
6656	-0.000367
6657	-0.000366
6658	-0.000357
6659	-0.000337
6660	-0.00035
6661	-0.000434
6662	-0.000479
6663	-0.000444
6664	-0.000404
6665	-0.000388
6666	-0.000364
6667	-0.000299
6668	-0.00023
6669	-0.000204
6670	-0.000195
6671	-0.000235
6672	-0.000267
6673	-0.000316
6674	-0.000388
6675	-0.000411
6676	-0.000339
6677	-0.000282
6678	-0.000296
6679	-0.000393
6680	-0.000459
6681	-0.000459
6682	-0.000419
6683	-0.000429
6684	-0.000458
6685	-0.000482
6686	-0.000487
6687	-0.000481
6688	-0.000444
6689	-0.000369
6690	-0.000338
6691	-0.000358
6692	-0.000341
6693	-0.00036
6694	-0.000328
6695	-0.000331
6696	-0.000372
6697	-0.000412
6698	-0.000409
6699	-0.00035
6700	-0.000281
6701	-0.000277
6702	-0.000312
6703	-0.000346
6704	-0.000386
6705	-0.000383
6706	-0.000347
6707	-0.000344
6708	-0.000344
6709	-0.000327
6710	-0.000303
6711	-0.000305
6712	-0.000273
6713	-0.00028
6714	-0.00036
6715	-0.000399
6716	-0.000357
6717	-0.000345
6718	-0.0003
6719	-0.000285
6720	-0.000267
6721	-0.000276
6722	-0.000313
6723	-0.000319
6724	-0.000284
6725	-0.000298
6726	-0.000336
6727	-0.000367
6728	-0.000358
6729	-0.000339
6730	-0.000348
6731	-0.000434
6732	-0.000434
6733	-0.000348
6734	-0.000217
6735	-0.000125
6736	-9.5e-05
6737	-0.000123
6738	-0.000164
6739	-0.000213
6740	-0.000209
6741	-0.000201
6742	-0.000187
6743	-0.00014
6744	-0.00013
6745	-0.000133
6746	-0.00018
6747	-0.00023
6748	-0.00032
6749	-0.00036
6750	-0.000307
6751	-0.000213
6752	-0.000161
6753	-0.000192
6754	-0.000173
6755	-0.000133
6756	-0.000137
6757	-0.000187
6758	-0.00022
6759	-0.000244
6760	-0.000275
6761	-0.000277
6762	-0.00028
6763	-0.000269
6764	-0.000259
6765	-0.000279
6766	-0.000269
6767	-0.000243
6768	-0.0002
6769	-0.000187
6770	-0.000164
6771	-0.000195
6772	-0.00025
6773	-0.000248
6774	-0.00021
6775	-0.000203
6776	-0.000272
6777	-0.00034
6778	-0.000352
6779	-0.000292
6780	-0.000249
6781	-0.000208
6782	-0.000196
6783	-0.000168
6784	-0.000183
6785	-0.000213
6786	-0.000197
6787	-0.000176
6788	-0.000143
6789	-0.000155
6790	-0.000185
6791	-0.000195
6792	-0.000198
6793	-0.000241
6794	-0.000235
6795	-0.00023
6796	-0.000248
6797	-0.000265
6798	-0.000194
6799	-0.000151
6800	-0.000177
6801	-0.000207
6802	-0.000222
6803	-0.000225
6804	-0.000226
6805	-0.000239
6806	-0.000298
6807	-0.000321
6808	-0.000286
6809	-0.000276
6810	-0.000265
6811	-0.000246
6812	-0.000241
6813	-0.000215
6814	-0.000166
6815	-9.5e-05
6816	-0.000114
6817	-0.000102
6818	-0.000142
6819	-0.000159
6820	-0.00017
6821	-0.000207
6822	-0.000249
6823	-0.00024
6824	-0.00019
6825	-0.000132
6826	-9.8e-05
6827	-8.8e-05
6828	-0.000109
6829	-0.000141
6830	-0.000173
6831	-0.000186
6832	-0.000126
6833	-4e-05
6834	-4.8e-05
6835	-5.7e-05
6836	-9e-05
6837	-0.000136
6838	-0.000173
6839	-0.000156
6840	-0.000169
6841	-0.000225
6842	-0.000219
6843	-0.000231
6844	-0.00024
6845	-0.000196
6846	-0.000119
6847	-0.000117
6848	-0.000144
6849	-0.000207
6850	-0.00026
6851	-0.000255
6852	-0.000221
6853	-0.000178
6854	-0.000123
6855	-9e-05
6856	-9.1e-05
6857	-0.000142
6858	-0.000181
6859	-0.000209
6860	-0.000218
6861	-0.000209
6862	-0.000172
6863	-0.000151
6864	-0.000164
6865	-0.000207
6866	-0.000247
6867	-0.000309
6868	-0.000331
6869	-0.000267
6870	-0.000209
6871	-0.000197
6872	-0.000245
6873	-0.000258
6874	-0.000252
6875	-0.000218
6876	-0.000152
6877	-0.000152
6878	-0.000197
6879	-0.000215
6880	-0.000204
6881	-0.000232
6882	-0.00026
6883	-0.000267
6884	-0.000249
6885	-0.000216
6886	-0.000247
6887	-0.000313
6888	-0.000239
6889	-0.000161
6890	-0.000146
6891	-0.000156
6892	-0.000153
6893	-0.000196
6894	-0.000277
6895	-0.000276
6896	-0.000253
6897	-0.000244
6898	-0.000288
6899	-0.000303
6900	-0.000262
6901	-0.000242
6902	-0.000272
6903	-0.000291
6904	-0.000304
6905	-0.000351
6906	-0.000326
6907	-0.000278
6908	-0.000286
6909	-0.000309
6910	-0.000345
6911	-0.000358
6912	-0.000323
6913	-0.000312
6914	-0.000282
6915	-0.000259
6916	-0.000251
6917	-0.00024
6918	-0.000231
6919	-0.000208
6920	-0.000226
6921	-0.000262
6922	-0.000225
6923	-0.000166
6924	-0.000177
6925	-0.000135
6926	-0.000125
6927	-0.000182
6928	-0.00019
6929	-0.000196
6930	-0.000209
6931	-0.000216
6932	-0.000207
6933	-0.000215
6934	-0.000252
6935	-0.000202
6936	-0.000165
6937	-0.000186
6938	-0.000285
6939	-0.000316
6940	-0.000249
6941	-0.000208
6942	-0.000236
6943	-0.000281
6944	-0.000326
6945	-0.000341
6946	-0.00036
6947	-0.000387
6948	-0.000414
6949	-0.000376
6950	-0.000344
6951	-0.000323
6952	-0.000325
6953	-0.00034
6954	-0.000327
6955	-0.000334
6956	-0.00035
6957	-0.000339
6958	-0.000338
6959	-0.000336
6960	-0.000342
6961	-0.000311
6962	-0.000304
6963	-0.000321
6964	-0.00037
6965	-0.000371
6966	-0.000361
6967	-0.000395
6968	-0.000408
6969	-0.000418
6970	-0.000364
6971	-0.000349
6972	-0.000331
6973	-0.000335
6974	-0.00029
6975	-0.000297
6976	-0.000305
6977	-0.000303
6978	-0.000255
6979	-0.00026
6980	-0.000269
6981	-0.000311
6982	-0.000327
6983	-0.000356
6984	-0.00033
6985	-0.000248
6986	-0.000171
6987	-0.000175
6988	-0.000251
6989	-0.000316
6990	-0.000329
6991	-0.000297
6992	-0.000241
6993	-0.000196
6994	-0.000194
6995	-0.000218
6996	-0.000281
6997	-0.000327
6998	-0.000352
6999	-0.000406
7000	-0.000413
7001	-0.000452
7002	-0.000465
7003	-0.000434
7004	-0.000348
7005	-0.000249
7006	-0.00023
7007	-0.000228
7008	-0.000175
7009	-0.000155
7010	-0.000189
7011	-0.000197
7012	-0.000214
7013	-0.000298
7014	-0.000336
7015	-0.00033
7016	-0.000332
7017	-0.000307
7018	-0.000281
7019	-0.000256
7020	-0.00031
7021	-0.000306
7022	-0.000329
7023	-0.000302
7024	-0.000288
7025	-0.000297
7026	-0.000325
7027	-0.000335
7028	-0.000357
7029	-0.000386
7030	-0.000387
7031	-0.000399
7032	-0.000443
7033	-0.000431
7034	-0.000341
7035	-0.00027
7036	-0.000285
7037	-0.000314
7038	-0.000347
7039	-0.000398
7040	-0.000412
7041	-0.000379
7042	-0.000362
7043	-0.000373
7044	-0.000372
7045	-0.000316
7046	-0.000281
7047	-0.000222
7048	-0.000202
7049	-0.000196
7050	-0.000181
7051	-0.000218
7052	-0.000272
7053	-0.000291
7054	-0.000304
7055	-0.000319
7056	-0.000321
7057	-0.000311
7058	-0.00027
7059	-0.000288
7060	-0.000297
7061	-0.00034
7062	-0.000351
7063	-0.000338
7064	-0.000317
7065	-0.000256
7066	-0.000199
7067	-0.000131
7068	-0.000131
7069	-0.000152
7070	-0.000152
7071	-0.000179
7072	-0.00019
7073	-0.000187
7074	-0.000192
7075	-0.000228
7076	-0.00024
7077	-0.000278
7078	-0.00031
7079	-0.000334
7080	-0.000319
7081	-0.000275
7082	-0.000224
7083	-0.00019
7084	-0.000223
7085	-0.000243
7086	-0.000171
7087	-9.6e-05
7088	-8.6e-05
7089	-7.8e-05
7090	-0.000103
7091	-0.000174
7092	-0.000246
7093	-0.000266
7094	-0.000266
7095	-0.000243
7096	-0.000184
7097	-0.000164
7098	-0.000147
7099	-0.000133
7100	-0.000154
7101	-0.000216
7102	-0.000245
7103	-0.000242
7104	-0.000201
7105	-0.000167
7106	-0.000139
7107	-8.9e-05
7108	-0.000126
7109	-0.000185
7110	-0.000208
7111	-0.000225
7112	-0.000224
7113	-0.000205
7114	-0.000199
7115	-0.000205
7116	-0.000192
7117	-0.000195
7118	-0.000234
7119	-0.000244
7120	-0.000189
7121	-0.000136
7122	-0.000105
7123	-0.000146
7124	-0.000159
7125	-0.000155
7126	-0.000174
7127	-0.000207
7128	-0.000272
7129	-0.000267
7130	-0.000221
7131	-0.000154
7132	-9.8e-05
7133	-8.1e-05
7134	-0.000118
7135	-0.000197
7136	-0.000191
7137	-0.000155
7138	-0.000164
7139	-0.00021
7140	-0.000248
7141	-0.000274
7142	-0.000271
7143	-0.00028
7144	-0.000252
7145	-0.000245
7146	-0.000237
7147	-0.000214
7148	-0.000192
7149	-0.000215
7150	-0.000249
7151	-0.000289
7152	-0.000262
7153	-0.000214
7154	-0.000156
7155	-0.000198
7156	-0.00026
7157	-0.000253
7158	-0.000174
7159	-9e-05
7160	-8.9e-05
7161	-9.7e-05
7162	-9.5e-05
7163	-0.000139
7164	-0.000162
7165	-0.000139
7166	-0.000177
7167	-0.00025
7168	-0.000176
7169	-8.6e-05
7170	-5.5e-05
7171	-8.7e-05
7172	-0.00012
7173	-0.000143
7174	-0.000192
7175	-0.000192
7176	-0.000124
7177	-4e-05
7178	0
7179	-6.2e-05
7180	-0.000141
7181	-0.000117
7182	-9.9e-05
7183	-0.000131
7184	-0.00016
7185	-0.000185
7186	-0.000206
7187	-0.000206
7188	-0.000215
7189	-0.000234
7190	-0.000266
7191	-0.00025
7192	-0.000249
7193	-0.000228
7194	-0.000179
7195	-0.000167
7196	-0.000149
7197	-0.000118
7198	-0.000104
7199	-0.000136
7200	-0.000166
7201	-0.000206
7202	-0.000235
7203	-0.000273
7204	-0.000345
7205	-0.000348
7206	-0.000329
7207	-0.000286
7208	-0.000277
7209	-0.000258
7210	-0.000218
7211	-0.00018
7212	-0.000186
7213	-0.00021
7214	-0.000245
7215	-0.000314
7216	-0.000338
7217	-0.000308
7218	-0.000275
7219	-0.000292
7220	-0.000308
7221	-0.000308
7222	-0.000291
7223	-0.000245
7224	-0.000199
7225	-0.000197
7226	-0.000238
7227	-0.000219
7228	-0.000243
7229	-0.000277
7230	-0.000278
7231	-0.000301
7232	-0.000265
7233	-0.000229
7234	-0.000214
7235	-0.000195
7236	-0.000167
7237	-0.000173
7238	-0.000164
7239	-0.000155
7240	-0.000189
7241	-0.000259
7242	-0.000291
7243	-0.000261
7244	-0.000213
7245	-0.000174
7246	-0.000149
7247	-9.4e-05
7248	-5.8e-05
7249	-8.2e-05
7250	-0.000154
7251	-0.000225
7252	-0.000303
7253	-0.000342
7254	-0.000315
7255	-0.000233
7256	-0.00015
7257	-0.000123
7258	-0.000125
7259	-0.00014
7260	-0.000188
7261	-0.000253
7262	-0.000305
7263	-0.000317
7264	-0.000322
7265	-0.000306
7266	-0.000311
7267	-0.000313
7268	-0.000312
7269	-0.000326
7270	-0.000317
7271	-0.000295
7272	-0.000266
7273	-0.000239
7274	-0.000239
7275	-0.000261
7276	-0.000299
7277	-0.000338
7278	-0.000364
7279	-0.000327
7280	-0.00034
7281	-0.000371
7282	-0.00032
7283	-0.000232
7284	-0.000185
7285	-0.000228
7286	-0.000267
7287	-0.000282
7288	-0.000294
7289	-0.000309
7290	-0.00029
7291	-0.000302
7292	-0.000332
7293	-0.000328
7294	-0.000307
7295	-0.000285
7296	-0.000305
7297	-0.000333
7298	-0.000385
7299	-0.00042
7300	-0.00039
7301	-0.000376
7302	-0.000389
7303	-0.000369
7304	-0.000325
7305	-0.000313
7306	-0.000317
7307	-0.000371
7308	-0.000395
7309	-0.000345
7310	-0.000321
7311	-0.00034
7312	-0.000315
7313	-0.000308
7314	-0.00029
7315	-0.000263
7316	-0.000226
7317	-0.000229
7318	-0.000247
7319	-0.000335
7320	-0.000419
7321	-0.000447
7322	-0.000422
7323	-0.000401
7324	-0.000383
7325	-0.00034
7326	-0.000304
7327	-0.000316
7328	-0.000344
7329	-0.000345
7330	-0.00032
7331	-0.000312
7332	-0.000374
7333	-0.000447
7334	-0.000448
7335	-0.000441
7336	-0.000433
7337	-0.000374
7338	-0.000309
7339	-0.000285
7340	-0.000321
7341	-0.000403
7342	-0.000483
7343	-0.000502
7344	-0.000504
7345	-0.00047
7346	-0.000365
7347	-0.000319
7348	-0.000318
7349	-0.000393
7350	-0.000484
7351	-0.00053
7352	-0.000462
7353	-0.000439
7354	-0.00044
7355	-0.000458
7356	-0.000415
7357	-0.000338
7358	-0.000325
7359	-0.000342
7360	-0.000362
7361	-0.000421
7362	-0.000427
7363	-0.000414
7364	-0.000393
7365	-0.000377
7366	-0.000344
7367	-0.000389
7368	-0.00043
7369	-0.000423
7370	-0.000394
7371	-0.000386
7372	-0.000463
7373	-0.000493
7374	-0.000424
7375	-0.000385
7376	-0.000345
7377	-0.000297
7378	-0.000313
7379	-0.000348
7380	-0.000414
7381	-0.000444
7382	-0.00045
7383	-0.000424
7384	-0.000398
7385	-0.000421
7386	-0.00047
7387	-0.000506
7388	-0.000476
7389	-0.000403
7390	-0.000347
7391	-0.000349
7392	-0.000386
7393	-0.000427
7394	-0.000432
7395	-0.000416
7396	-0.000443
7397	-0.000483
7398	-0.000527
7399	-0.000551
7400	-0.000476
7401	-0.000429
7402	-0.000468
7403	-0.000483
7404	-0.000496
7405	-0.000502
7406	-0.000487
7407	-0.000498
7408	-0.000521
7409	-0.00056
7410	-0.000536
7411	-0.000489
7412	-0.00047
7413	-0.000434
7414	-0.000391
7415	-0.000357
7416	-0.000372
7417	-0.000408
7418	-0.000467
7419	-0.000548
7420	-0.000591
7421	-0.00058
7422	-0.00061
7423	-0.000634
7424	-0.000636
7425	-0.000595
7426	-0.000544
7427	-0.000502
7428	-0.000435
7429	-0.000334
7430	-0.000255
7431	-0.000226
7432	-0.00024
7433	-0.000243
7434	-0.000266
7435	-0.000272
7436	-0.000236
7437	-0.000179
7438	-0.000178
7439	-0.000219
7440	-0.000256
7441	-0.000272
7442	-0.000309
7443	-0.000345
7444	-0.000372
7445	-0.000333
7446	-0.00029
7447	-0.000358
7448	-0.000447
7449	-0.000432
7450	-0.000347
7451	-0.000368
7452	-0.000388
7453	-0.000385
7454	-0.000374
7455	-0.000319
7456	-0.000281
7457	-0.000267
7458	-0.000295
7459	-0.000336
7460	-0.000403
7461	-0.00042
7462	-0.000413
7463	-0.000422
7464	-0.000389
7465	-0.000352
7466	-0.000341
7467	-0.000349
7468	-0.000345
7469	-0.000357
7470	-0.000353
7471	-0.00033
7472	-0.000289
7473	-0.000237
7474	-0.000208
7475	-0.000233
7476	-0.00024
7477	-0.000264
7478	-0.000288
7479	-0.000289
7480	-0.000294
7481	-0.00029
7482	-0.000209
7483	-0.000163
7484	-0.000136
7485	-0.000169
7486	-0.000198
7487	-0.000231
7488	-0.000259
7489	-0.000292
7490	-0.00027
7491	-0.000234
7492	-0.000164
7493	-0.000139
7494	-0.000103
7495	-9.1e-05
7496	-0.000117
7497	-0.000183
7498	-0.000235
7499	-0.000202
7500	-0.000167
7501	-0.0002
7502	-0.000209
7503	-0.000176
7504	-0.000169
7505	-0.000158
7506	-0.000164
7507	-0.0002
7508	-0.000261
7509	-0.000342
7510	-0.000389
7511	-0.00034
7512	-0.000291
7513	-0.000287
7514	-0.000261
7515	-0.000226
7516	-0.000208
7517	-0.000193
7518	-0.000215
7519	-0.000235
7520	-0.000245
7521	-0.000304
7522	-0.000364
7523	-0.000361
7524	-0.000334
7525	-0.000329
7526	-0.000327
7527	-0.000313
7528	-0.000285
7529	-0.000272
7530	-0.000233
7531	-0.000242
7532	-0.000277
7533	-0.000341
7534	-0.00039
7535	-0.000398
7536	-0.000393
7537	-0.000356
7538	-0.00034
7539	-0.000288
7540	-0.000267
7541	-0.000278
7542	-0.000285
7543	-0.000339
7544	-0.000385
7545	-0.000404
7546	-0.000457
7547	-0.000479
7548	-0.000454
7549	-0.000408
7550	-0.000394
7551	-0.000341
7552	-0.000329
7553	-0.00034
7554	-0.000389
7555	-0.000448
7556	-0.000456
7557	-0.000416
7558	-0.000388
7559	-0.000345
7560	-0.000302
7561	-0.000273
7562	-0.000238
7563	-0.000277
7564	-0.000355
7565	-0.000416
7566	-0.000371
7567	-0.000275
7568	-0.000265
7569	-0.0003
7570	-0.000327
7571	-0.000313
7572	-0.000295
7573	-0.000261
7574	-0.000228
7575	-0.000249
7576	-0.000255
7577	-0.000222
7578	-0.0002
7579	-0.00018
7580	-0.000209
7581	-0.000264
7582	-0.000284
7583	-0.000246
7584	-0.000165
7585	-0.00018
7586	-0.000248
7587	-0.000307
7588	-0.000312
7589	-0.000254
7590	-0.00022
7591	-0.000204
7592	-0.000214
7593	-0.000216
7594	-0.000272
7595	-0.000323
7596	-0.000383
7597	-0.000387
7598	-0.000417
7599	-0.000412
7600	-0.000344
7601	-0.000298
7602	-0.000309
7603	-0.000327
7604	-0.00035
7605	-0.000308
7606	-0.000302
7607	-0.000384
7608	-0.000417
7609	-0.0004
7610	-0.000363
7611	-0.000398
7612	-0.000462
7613	-0.000444
7614	-0.000408
7615	-0.00045
7616	-0.000533
7617	-0.000522
7618	-0.000484
7619	-0.000402
7620	-0.000363
7621	-0.000386
7622	-0.000438
7623	-0.000483
7624	-0.000494
7625	-0.000508
7626	-0.000468
7627	-0.000473
7628	-0.000491
7629	-0.000493
7630	-0.00046
7631	-0.000385
7632	-0.000315
7633	-0.000278
7634	-0.000284
7635	-0.000323
7636	-0.00037
7637	-0.000361
7638	-0.00031
7639	-0.000309
7640	-0.000332
7641	-0.00039
7642	-0.000426
7643	-0.000459
7644	-0.000413
7645	-0.000342
7646	-0.000278
7647	-0.00024
7648	-0.000266
7649	-0.000305
7650	-0.000318
7651	-0.000288
7652	-0.000283
7653	-0.000243
7654	-0.000235
7655	-0.000251
7656	-0.000279
7657	-0.000261
7658	-0.000196
7659	-0.000186
7660	-0.000206
7661	-0.000177
7662	-0.000175
7663	-0.000177
7664	-0.000219
7665	-0.000254
7666	-0.000275
7667	-0.000283
7668	-0.000295
7669	-0.000291
7670	-0.000307
7671	-0.000326
7672	-0.000368
7673	-0.00042
7674	-0.000406
7675	-0.000387
7676	-0.000412
7677	-0.000429
7678	-0.000469
7679	-0.000484
7680	-0.000436
7681	-0.000438
7682	-0.000468
7683	-0.000494
7684	-0.000517
7685	-0.000523
7686	-0.000507
7687	-0.000476
7688	-0.000399
7689	-0.000376
7690	-0.000336
7691	-0.000298
7692	-0.000295
7693	-0.00038
7694	-0.000472
7695	-0.000484
7696	-0.000456
7697	-0.000431
7698	-0.000409
7699	-0.000394
7700	-0.000433
7701	-0.000427
7702	-0.000411
7703	-0.000451
7704	-0.00054
7705	-0.000534
7706	-0.0005
7707	-0.000499
7708	-0.000514
7709	-0.000518
7710	-0.000544
7711	-0.000548
7712	-0.000531
7713	-0.000519
7714	-0.00052
7715	-0.000521
7716	-0.000593
7717	-0.0006
7718	-0.000545
7719	-0.000579
7720	-0.000593
7721	-0.000576
7722	-0.000543
7723	-0.000505
7724	-0.000491
7725	-0.000544
7726	-0.000545
7727	-0.000528
7728	-0.000515
7729	-0.000539
7730	-0.000495
7731	-0.000405
7732	-0.000349
7733	-0.000309
7734	-0.000323
7735	-0.000366
7736	-0.000449
7737	-0.000504
7738	-0.000515
7739	-0.000486
7740	-0.00043
7741	-0.000426
7742	-0.000412
7743	-0.000404
7744	-0.000439
7745	-0.000507
7746	-0.000542
7747	-0.000583
7748	-0.000572
7749	-0.000554
7750	-0.000519
7751	-0.000508
7752	-0.000481
7753	-0.000431
7754	-0.000419
7755	-0.000449
7756	-0.00047
7757	-0.000484
7758	-0.000475
7759	-0.000512
7760	-0.000527
7761	-0.000503
7762	-0.000467
7763	-0.000449
7764	-0.000466
7765	-0.000426
7766	-0.000407
7767	-0.000427
7768	-0.00046
7769	-0.000396
7770	-0.000328
7771	-0.000326
7772	-0.000381
7773	-0.000413
7774	-0.000397
7775	-0.000362
7776	-0.000336
7777	-0.000327
7778	-0.000373
7779	-0.000372
7780	-0.000333
7781	-0.000303
7782	-0.00029
7783	-0.000298
7784	-0.000306
7785	-0.00027
7786	-0.000234
7787	-0.000272
7788	-0.000345
7789	-0.000391
7790	-0.000413
7791	-0.00036
7792	-0.000312
7793	-0.000247
7794	-0.000228
7795	-0.000194
7796	-0.000145
7797	-8.8e-05
7798	-0.000174
7799	-0.000303
7800	-0.00032
7801	-0.00023
7802	-0.000161
7803	-0.000155
7804	-0.000188
7805	-0.000233
7806	-0.000247
7807	-0.000209
7808	-0.000152
7809	-8.1e-05
7810	1.4e-05
7811	8.3e-05
7812	0.000134
7813	0.000124
7814	1.6e-05
7815	-5.6e-05
7816	5e-06
7817	6e-05
7818	8.4e-05
7819	0.000101
7820	2.8e-05
7821	-1.8e-05
7822	-2.9e-05
7823	2e-06
7824	6.1e-05
7825	0.000131
7826	0.000154
7827	0.00014
7828	0.000167
7829	0.000182
7830	0.000179
7831	0.000164
7832	0.00011
7833	3.2e-05
7834	-4.2e-05
7835	-0.000101
7836	-0.000139
7837	-9.2e-05
7838	-1.9e-05
7839	4.2e-05
7840	8e-05
7841	0.000125
7842	0.000131
7843	9.1e-05
7844	9.2e-05
7845	0.00017
7846	0.000227
7847	0.000258
7848	0.000267
7849	0.000226
7850	0.000279
7851	0.000322
7852	0.00032
7853	0.00032
7854	0.000373
7855	0.000413
7856	0.000438
7857	0.000458
7858	0.000457
7859	0.000372
7860	0.000288
7861	0.00028
7862	0.000364
7863	0.000417
7864	0.00044
7865	0.00042
7866	0.000401
7867	0.000396
7868	0.000381
7869	0.000396
7870	0.00041
7871	0.000418
7872	0.000378
7873	0.000329
7874	0.00026
7875	0.000254
7876	0.000298
7877	0.000336
7878	0.000375
7879	0.000402
7880	0.000374
7881	0.000312
7882	0.000303
7883	0.000349
7884	0.00034
7885	0.000355
7886	0.000344
7887	0.000336
7888	0.000359
7889	0.000382
7890	0.00041
7891	0.000395
7892	0.000391
7893	0.000361
7894	0.000359
7895	0.000346
7896	0.000327
7897	0.000376
7898	0.000404
7899	0.000365
7900	0.000318
7901	0.000305
7902	0.000355
7903	0.000406
7904	0.000418
7905	0.000399
7906	0.000374
7907	0.000349
7908	0.000355
7909	0.00035
7910	0.000362
7911	0.000379
7912	0.000428
7913	0.000435
7914	0.000431
7915	0.000453
7916	0.000425
7917	0.000408
7918	0.000444
7919	0.000473
7920	0.000421
7921	0.000394
7922	0.000454
7923	0.000509
7924	0.000548
7925	0.000534
7926	0.000489
7927	0.000429
7928	0.000402
7929	0.000404
7930	0.000449
7931	0.00042
7932	0.00035
7933	0.000331
7934	0.000365
7935	0.000385
7936	0.000386
7937	0.000375
7938	0.000347
7939	0.000354
7940	0.000346
7941	0.000288
7942	0.000335
7943	0.000401
7944	0.000383
7945	0.000359
7946	0.00036
7947	0.000337
7948	0.000276
7949	0.000267
7950	0.000341
7951	0.000438
7952	0.00042
7953	0.000387
7954	0.000424
7955	0.000457
7956	0.00043
7957	0.000415
7958	0.000418
7959	0.000416
7960	0.000441
7961	0.000429
7962	0.000416
7963	0.000391
7964	0.000422
7965	0.000403
7966	0.000338
7967	0.000208
7968	5.8e-05
7969	4e-06
7970	-5.5e-05
7971	-5.1e-05
7972	-1.5e-05
7973	4e-06
7974	-1e-05
7975	-2.7e-05
7976	-3.4e-05
7977	-4.2e-05
7978	-6.7e-05
7979	-9.4e-05
7980	-0.000129
7981	-9.6e-05
7982	-1.8e-05
7983	6.7e-05
7984	5.3e-05
7985	-5e-06
7986	-9e-06
7987	1.4e-05
7988	2.7e-05
7989	-2.4e-05
7990	-4.1e-05
7991	-7.5e-05
7992	-0.000103
7993	-9.2e-05
7994	-6.2e-05
7995	-5.6e-05
7996	-8.3e-05
7997	-0.00011
7998	-0.000138
[truncated: 3,401 more rows]

## Sheet: G349dC
Time	UV
6000	0.002209
6001	0.002186
6002	0.002189
6003	0.002154
6004	0.002128
6005	0.002124
6006	0.002129
6007	0.002155
6008	0.002174
6009	0.002168
6010	0.002162
6011	0.002182
6012	0.00219
6013	0.002188
6014	0.002166
6015	0.002159
6016	0.002148
6017	0.002144
6018	0.002156
6019	0.002151
6020	0.002093
6021	0.002071
6022	0.002101
6023	0.002137
6024	0.002172
6025	0.002184
6026	0.002192
6027	0.002197
6028	0.002179
6029	0.0022
6030	0.002232
6031	0.002227
6032	0.002238
6033	0.002238
6034	0.002215
6035	0.002193
6036	0.002222
6037	0.002251
6038	0.002247
6039	0.002201
6040	0.002168
6041	0.002147
6042	0.00217
6043	0.00217
6044	0.002165
6045	0.002154
6046	0.00215
6047	0.002154
6048	0.002141
6049	0.002116
6050	0.002106
6051	0.00212
6052	0.00212
6053	0.002123
6054	0.002118
6055	0.002126
6056	0.002141
6057	0.002135
6058	0.002072
6059	0.002037
6060	0.002056
6061	0.002003
6062	0.002001
6063	0.002013
6064	0.002061
6065	0.002072
6066	0.002091
6067	0.002076
6068	0.002084
6069	0.002109
6070	0.002098
6071	0.00209
6072	0.002078
6073	0.002096
6074	0.002123
6075	0.002137
6076	0.002153
6077	0.002154
6078	0.002137
6079	0.00215
6080	0.002185
6081	0.002189
6082	0.002172
6083	0.002148
6084	0.002117
6085	0.002106
6086	0.002083
6087	0.002144
6088	0.00218
6089	0.002163
6090	0.00217
6091	0.002163
6092	0.002171
6093	0.002151
6094	0.002123
6095	0.002119
6096	0.002193
6097	0.002197
6098	0.002151
6099	0.002181
6100	0.002255
6101	0.002271
6102	0.002212
6103	0.002159
6104	0.002191
6105	0.002198
6106	0.002158
6107	0.002159
6108	0.002196
6109	0.002236
6110	0.002241
6111	0.002252
6112	0.002275
6113	0.00228
6114	0.002269
6115	0.002247
6116	0.002239
6117	0.002238
6118	0.002259
6119	0.002269
6120	0.002297
6121	0.002263
6122	0.00228
6123	0.00234
6124	0.002352
6125	0.002312
6126	0.002311
6127	0.002349
6128	0.002355
6129	0.002315
6130	0.002318
6131	0.002351
6132	0.002349
6133	0.002316
6134	0.002258
6135	0.002226
6136	0.002247
6137	0.002241
6138	0.002222
6139	0.00222
6140	0.002215
6141	0.002195
6142	0.002191
6143	0.002191
6144	0.002221
6145	0.00228
6146	0.002264
6147	0.002268
6148	0.002284
6149	0.00229
6150	0.002293
6151	0.002284
6152	0.002276
6153	0.002222
6154	0.002222
6155	0.002267
6156	0.002269
6157	0.002267
6158	0.002283
6159	0.002289
6160	0.002328
6161	0.002301
6162	0.002276
6163	0.002288
6164	0.002331
6165	0.002353
6166	0.002327
6167	0.002332
6168	0.002338
6169	0.002357
6170	0.002356
6171	0.002347
6172	0.002348
6173	0.002346
6174	0.002346
6175	0.002404
6176	0.002429
6177	0.002421
6178	0.002414
6179	0.002415
6180	0.00242
6181	0.002417
6182	0.002442
6183	0.002437
6184	0.002398
6185	0.002399
6186	0.002433
6187	0.002424
6188	0.002414
6189	0.00243
6190	0.002446
6191	0.002444
6192	0.002429
6193	0.002414
6194	0.00238
6195	0.002368
6196	0.002445
6197	0.002483
6198	0.002529
6199	0.002539
6200	0.002477
6201	0.002392
6202	0.002436
6203	0.002478
6204	0.002478
6205	0.002453
6206	0.002424
6207	0.002404
6208	0.002431
6209	0.002473
6210	0.002482
6211	0.002538
6212	0.002555
6213	0.002554
6214	0.002529
6215	0.002523
6216	0.002537
6217	0.002556
6218	0.002591
6219	0.002616
6220	0.002638
6221	0.002612
6222	0.002595
6223	0.002558
6224	0.002552
6225	0.002551
6226	0.00254
6227	0.002497
6228	0.002467
6229	0.002457
6230	0.002465
6231	0.002438
6232	0.002436
6233	0.002478
6234	0.002495
6235	0.002503
6236	0.00252
6237	0
6238	0
6239	1.4e-05
6240	4.2e-05
6241	7.8e-05
6242	0.00013
6243	0.000111
6244	8.4e-05
6245	8.7e-05
6246	0.000149
6247	0.000144
6248	0.000148
6249	0.000136
6250	0.000167
6251	0.00018
6252	0.000176
6253	0.000144
6254	9.8e-05
6255	8.8e-05
6256	0.000106
6257	0.000141
6258	0.000169
6259	0.000187
6260	0.000199
6261	0.000178
6262	0.000156
6263	0.000171
6264	0.000161
6265	0.000149
6266	0.000188
6267	0.000183
6268	0.000163
6269	0.000139
6270	0.000126
6271	0.000158
6272	0.000181
6273	0.00017
6274	0.000157
6275	0.000155
6276	0.000145
6277	0.000126
6278	0.00014
6279	0.000142
6280	0.000182
6281	0.000162
6282	0.00016
6283	0.000177
6284	0.000181
6285	0.000149
6286	0.00013
6287	0.000204
6288	0.000276
6289	0.000287
6290	0.000254
6291	0.000222
6292	0.000179
6293	0.000127
6294	0.00012
6295	0.000137
6296	0.000178
6297	0.000162
6298	9.4e-05
6299	8.3e-05
6300	0.00012
6301	0.000139
6302	0.000135
6303	0.000117
6304	0.000108
6305	8.7e-05
6306	5.8e-05
6307	6.4e-05
6308	9.3e-05
6309	0.000103
6310	0.0001
6311	9.1e-05
6312	9.7e-05
6313	0.000109
6314	0.00011
6315	0.000106
6316	0.000107
6317	9.9e-05
6318	8.9e-05
6319	9.2e-05
6320	0.000124
6321	0.000105
6322	9.1e-05
6323	6.8e-05
6324	6.3e-05
6325	7.4e-05
6326	5.4e-05
6327	5.2e-05
6328	4.8e-05
6329	3.2e-05
6330	1.4e-05
6331	-1.5e-05
6332	-1e-06
6333	2e-06
6334	6e-06
6335	-1e-06
6336	3e-05
6337	4.9e-05
6338	3.6e-05
6339	5.9e-05
6340	5.7e-05
6341	5.1e-05
6342	3.2e-05
6343	4e-05
6344	6e-05
6345	0.00011
6346	8.6e-05
6347	4.7e-05
6348	6e-05
6349	0.000109
6350	0.000151
6351	0.000186
6352	0.0002
6353	0.000162
6354	0.000116
6355	0.000102
6356	7e-05
6357	3.9e-05
6358	5.3e-05
6359	4.2e-05
6360	-3e-06
6361	2e-06
6362	2.5e-05
6363	3e-05
6364	3e-05
6365	3.7e-05
6366	1e-06
6367	-1.8e-05
6368	-9e-06
6369	9e-06
6370	-1.5e-05
6371	-3.7e-05
6372	-3.6e-05
6373	-5.2e-05
6374	-6.3e-05
6375	-3.1e-05
6376	-5e-06
6377	4.5e-05
6378	6.5e-05
6379	3.7e-05
6380	4e-06
6381	-5e-06
6382	-1.9e-05
6383	-1.6e-05
6384	-4e-06
6385	4e-06
6386	-1e-06
6387	-2.1e-05
6388	-2.2e-05
6389	2.2e-05
6390	2.3e-05
6391	7e-06
6392	-3e-05
6393	-0.0001
6394	-0.000133
6395	-0.000109
6396	-7.9e-05
6397	-7.7e-05
6398	-8.2e-05
6399	-8.1e-05
6400	-7.9e-05
6401	-7.9e-05
6402	-8.5e-05
6403	-8.9e-05
6404	-0.000105
6405	-7.2e-05
6406	-5.5e-05
6407	-3.6e-05
6408	-4.3e-05
6409	-5.3e-05
6410	-6.5e-05
6411	-6.2e-05
6412	-4.3e-05
6413	-2.1e-05
6414	5.1e-05
6415	0.000115
6416	6.5e-05
6417	1.9e-05
6418	-1e-06
6419	8e-06
6420	-6e-06
6421	-1.9e-05
6422	-1.7e-05
6423	2.2e-05
6424	3.2e-05
6425	6e-05
6426	4.9e-05
6427	6e-05
6428	7.8e-05
6429	7.2e-05
6430	4.8e-05
6431	3.3e-05
6432	3e-05
6433	4.9e-05
6434	2.2e-05
6435	-4.5e-05
6436	-3.6e-05
6437	3.9e-05
6438	9.7e-05
6439	0.000125
6440	0.000139
6441	0.000129
6442	0.000117
6443	0.000111
6444	9.7e-05
6445	0.000101
6446	8.1e-05
6447	4.4e-05
6448	3.2e-05
6449	5e-05
6450	4.1e-05
6451	7.5e-05
6452	0.000101
6453	7.8e-05
6454	5.6e-05
6455	3.4e-05
6456	1.8e-05
6457	3.9e-05
6458	2.9e-05
6459	0
6460	-6e-06
6461	-1.3e-05
6462	1e-05
6463	4.1e-05
6464	3e-05
6465	-1.1e-05
6466	-6.1e-05
6467	-3.6e-05
6468	1.4e-05
6469	-4e-06
6470	-5.7e-05
6471	-7.9e-05
6472	-8.5e-05
6473	-0.000103
6474	-9.6e-05
6475	-9.8e-05
6476	-9.2e-05
6477	-9.9e-05
6478	-9e-05
6479	-9e-05
6480	-8.8e-05
6481	-0.000104
6482	-0.000112
6483	-7.7e-05
6484	-6.4e-05
6485	-9.4e-05
6486	-0.000111
6487	-0.000103
6488	-0.000142
6489	-0.000164
6490	-0.000168
6491	-0.000128
6492	-0.000113
6493	-9.1e-05
6494	-9.5e-05
6495	-0.000123
6496	-0.000132
6497	-0.000129
6498	-0.000104
6499	-7.3e-05
6500	-5.2e-05
6501	-8.8e-05
6502	-0.000119
6503	-0.000142
6504	-0.000171
6505	-0.000169
6506	-0.000168
6507	-0.000188
6508	-0.000181
6509	-0.000176
6510	-0.000186
6511	-0.000199
6512	-0.000187
6513	-0.000208
6514	-0.00023
6515	-0.000247
6516	-0.00023
6517	-0.000199
6518	-0.000161
6519	-0.000196
6520	-0.000259
6521	-0.000276
6522	-0.000264
6523	-0.000248
6524	-0.000209
6525	-0.000191
6526	-0.000163
6527	-0.000146
6528	-0.000169
6529	-0.000203
6530	-0.000241
6531	-0.000238
6532	-0.000231
6533	-0.000267
6534	-0.000287
6535	-0.000277
6536	-0.000243
6537	-0.000253
6538	-0.000279
6539	-0.00025
6540	-0.00023
6541	-0.000214
6542	-0.000193
6543	-0.000185
6544	-0.000193
6545	-0.000208
6546	-0.000238
6547	-0.000256
6548	-0.000209
6549	-0.000193
6550	-0.00021
6551	-0.000233
6552	-0.000241
6553	-0.000205
6554	-0.00018
6555	-0.000154
6556	-0.000162
6557	-0.000209
6558	-0.00022
6559	-0.000176
6560	-0.000183
6561	-0.000196
6562	-0.000261
6563	-0.000242
6564	-0.000199
6565	-0.000229
6566	-0.000243
6567	-0.00021
6568	-0.000194
6569	-0.000184
6570	-0.000156
6571	-0.000139
6572	-0.000102
6573	-9.2e-05
6574	-7.9e-05
6575	-9.6e-05
6576	-0.000119
6577	-0.000142
6578	-0.00016
6579	-0.000182
6580	-0.00021
6581	-0.000213
6582	-0.00021
6583	-0.000173
6584	-0.000153
6585	-0.000186
6586	-0.000218
6587	-0.000195
6588	-0.000163
6589	-0.000169
6590	-0.00016
6591	-0.000151
6592	-0.000154
6593	-0.000126
6594	-9.4e-05
6595	-8.7e-05
6596	-0.000123
6597	-0.000107
6598	-9.8e-05
6599	-0.000126
6600	-0.000107
6601	-7.9e-05
6602	-6.8e-05
6603	-7.8e-05
6604	-8.3e-05
6605	-0.000103
6606	-0.000128
6607	-0.000125
6608	-7.8e-05
6609	-5.4e-05
6610	-5.4e-05
6611	-7e-05
6612	-6.4e-05
6613	-8.4e-05
6614	-0.000106
6615	-0.000132
6616	-0.000173
6617	-0.000175
6618	-0.000169
6619	-0.000169
6620	-0.000151
6621	-0.000108
6622	-9.2e-05
6623	-0.000101
6624	-0.000203
6625	-0.000276
6626	-0.000278
6627	-0.000288
6628	-0.000321
6629	-0.000294
6630	-0.000215
6631	-0.000189
6632	-0.000197
6633	-0.000236
6634	-0.000256
6635	-0.000252
6636	-0.000225
6637	-0.000209
6638	-0.000196
6639	-0.000183
6640	-0.000169
6641	-0.000174
6642	-0.000174
6643	-0.000166
6644	-0.000115
6645	-0.000104
6646	-0.00013
6647	-0.000149
6648	-0.000142
6649	-0.000126
6650	-0.000103
6651	-5.9e-05
6652	-6.2e-05
6653	-0.000118
6654	-0.000163
6655	-0.00015
6656	-0.000134
6657	-0.000116
6658	-0.000105
6659	-0.000107
6660	-0.000136
6661	-0.000115
6662	-9.3e-05
6663	-7.8e-05
6664	-8.9e-05
6665	-0.000124
6666	-0.000152
6667	-0.000147
6668	-0.000128
6669	-9.8e-05
6670	-6.2e-05
6671	-2.3e-05
6672	6e-06
6673	3e-05
6674	2.1e-05
6675	3.8e-05
6676	2.4e-05
6677	2.8e-05
6678	-1.9e-05
6679	-6.7e-05
6680	-0.000127
6681	-0.000142
6682	-0.000113
6683	-9.6e-05
6684	-0.000107
6685	-0.000117
6686	-0.00011
6687	-0.000106
6688	-0.000115
6689	-9.3e-05
6690	-0.000112
6691	-9.7e-05
6692	-8.9e-05
6693	-8.1e-05
6694	-8.8e-05
6695	-5.8e-05
6696	-3.2e-05
6697	8e-06
6698	-3e-06
6699	-4.6e-05
6700	-8.4e-05
6701	-8.6e-05
6702	-7.5e-05
6703	-9.5e-05
6704	-6.7e-05
6705	-7.2e-05
6706	-9.7e-05
6707	-0.000145
6708	-0.000137
6709	-0.000139
6710	-0.000138
6711	-0.000147
6712	-0.000135
6713	-0.000111
6714	-0.000117
6715	-0.000115
6716	-0.000108
6717	-0.000111
6718	-6.7e-05
6719	-5.6e-05
6720	-0.000107
6721	-0.000156
6722	-0.000145
6723	-9.6e-05
6724	-8e-05
6725	-9.2e-05
6726	-0.000152
6727	-0.0002
6728	-0.000198
6729	-0.000128
6730	-0.0001
6731	-0.000123
6732	-0.000176
6733	-0.000159
6734	-0.000128
6735	-0.000119
6736	-0.000122
6737	-9.6e-05
6738	-8.5e-05
6739	-0.000142
6740	-0.000168
6741	-0.000129
6742	-9.4e-05
6743	-9e-05
6744	-0.000126
6745	-0.000145
6746	-0.00012
6747	-0.000122
6748	-0.000146
6749	-0.00017
6750	-0.000194
6751	-0.000195
6752	-0.000149
6753	-0.000149
6754	-0.000184
6755	-0.000187
6756	-0.000125
6757	-5.3e-05
6758	-3.8e-05
6759	-4.9e-05
6760	-8.6e-05
6761	-0.000119
6762	-0.000144
6763	-0.000153
6764	-0.000147
6765	-0.000142
6766	-0.000139
6767	-0.000145
6768	-0.000123
6769	-0.000117
6770	-0.000134
6771	-0.000162
6772	-0.000194
6773	-0.000233
6774	-0.000265
6775	-0.000266
6776	-0.00024
6777	-0.000233
6778	-0.000208
6779	-0.000186
6780	-0.000173
6781	-0.000185
6782	-0.000191
6783	-0.000174
6784	-0.0002
6785	-0.000184
6786	-0.000217
6787	-0.000262
6788	-0.000259
6789	-0.000212
6790	-0.000212
6791	-0.000233
6792	-0.000265
6793	-0.000287
6794	-0.000267
6795	-0.000234
6796	-0.000219
6797	-0.000231
6798	-0.000228
6799	-0.000227
6800	-0.000235
6801	-0.000213
6802	-0.000172
6803	-0.000189
6804	-0.000222
6805	-0.000211
6806	-0.00021
6807	-0.00024
6808	-0.000256
6809	-0.000284
6810	-0.000263
6811	-0.000231
6812	-0.00022
6813	-0.000228
6814	-0.00023
6815	-0.000256
6816	-0.000298
6817	-0.00029
6818	-0.000272
6819	-0.000212
6820	-0.000198
6821	-0.000195
6822	-0.000186
6823	-0.000171
6824	-0.000184
6825	-0.000221
6826	-0.000239
6827	-0.000217
6828	-0.000185
6829	-0.000195
6830	-0.000185
6831	-0.000153
6832	-0.000153
6833	-0.000187
6834	-0.000227
6835	-0.000221
6836	-0.00016
6837	-0.00012
6838	-0.000118
6839	-0.000147
6840	-0.000166
6841	-0.000167
6842	-0.000137
6843	-0.00013
6844	-0.000167
6845	-0.00017
6846	-0.00015
6847	-0.000146
6848	-0.000164
6849	-0.000198
6850	-0.000203
6851	-0.000227
6852	-0.000223
6853	-0.0002
6854	-0.000174
6855	-0.0002
6856	-0.000221
6857	-0.000181
6858	-0.000165
6859	-0.000149
6860	-0.000134
6861	-0.000122
6862	-0.000114
6863	-8.8e-05
6864	-9.3e-05
6865	-0.000103
6866	-0.000108
6867	-0.000109
6868	-0.000142
6869	-0.000135
6870	-7.8e-05
6871	-4e-05
6872	-5.2e-05
6873	-3.9e-05
6874	-4.2e-05
6875	-5e-05
6876	-2.8e-05
6877	-2.4e-05
6878	-3.8e-05
6879	-6.4e-05
6880	-7.2e-05
6881	-5.7e-05
6882	-3.3e-05
6883	-4.3e-05
6884	6e-06
6885	3.8e-05
6886	5.1e-05
6887	4.8e-05
6888	1.2e-05
6889	-2.9e-05
6890	-4.7e-05
6891	-3e-05
6892	-2.4e-05
6893	-2.8e-05
6894	-5.5e-05
6895	-6.8e-05
6896	-4.6e-05
6897	-5.5e-05
6898	-7.7e-05
6899	-6.9e-05
6900	-7.3e-05
6901	-0.00011
6902	-0.000129
6903	-0.000124
6904	-9.7e-05
6905	-9.1e-05
6906	-7.3e-05
6907	-6.3e-05
6908	-6e-06
6909	2.2e-05
6910	3e-05
6911	-8e-06
6912	-4.7e-05
6913	-5.1e-05
6914	-6.4e-05
6915	-7.3e-05
6916	-4.1e-05
6917	-3.1e-05
6918	-6.7e-05
6919	-6.3e-05
6920	-2.1e-05
6921	2.5e-05
6922	3.1e-05
6923	1.8e-05
6924	-2.4e-05
6925	-5.1e-05
6926	-8.2e-05
6927	-8e-05
6928	-5.4e-05
6929	-4.2e-05
6930	-1.3e-05
6931	1.5e-05
6932	2.9e-05
6933	3.4e-05
6934	-2e-06
6935	-4.2e-05
6936	-7.9e-05
6937	-6e-05
6938	-5.9e-05
6939	-3.2e-05
6940	-4e-05
6941	-4.8e-05
6942	-4.7e-05
6943	-6.7e-05
6944	-0.000108
6945	-0.000161
6946	-0.00019
6947	-0.000154
6948	-0.000111
6949	-9.6e-05
6950	-7.6e-05
6951	-7.5e-05
6952	-6.8e-05
6953	-4.1e-05
6954	-3e-05
6955	-6.7e-05
6956	-9.2e-05
6957	-0.000112
6958	-0.000111
6959	-3.5e-05
6960	-2.8e-05
6961	-3.5e-05
6962	-2.7e-05
6963	-2e-06
6964	3.9e-05
6965	4.4e-05
6966	-1.6e-05
6967	-4.1e-05
6968	-5.9e-05
6969	-7.3e-05
6970	-4.5e-05
6971	-5.1e-05
6972	-6.9e-05
6973	-0.00012
6974	-0.000131
6975	-0.000131
6976	-0.000152
6977	-0.000189
6978	-0.000162
6979	-0.000134
6980	-0.00013
6981	-9.5e-05
6982	-4.8e-05
6983	-3.5e-05
6984	-2.8e-05
6985	-4.5e-05
6986	-6.5e-05
6987	-8.6e-05
6988	-8.5e-05
6989	-0.000105
6990	-0.00011
6991	-0.000106
6992	-8.6e-05
6993	-0.000107
6994	-0.000105
6995	-7.6e-05
6996	-9.2e-05
6997	-9.2e-05
6998	-8.7e-05
6999	-5.2e-05
7000	-4.8e-05
7001	-0.000123
7002	-0.000156
7003	-6.2e-05
7004	4.1e-05
7005	5.7e-05
7006	2.7e-05
7007	3e-06
7008	1e-06
7009	-2.5e-05
7010	-7.5e-05
7011	-0.000105
7012	-8.5e-05
7013	-9.4e-05
7014	-9.5e-05
7015	-0.000113
7016	-0.000133
7017	-0.000153
7018	-0.000136
7019	-9.3e-05
7020	-0.0001
7021	-0.00014
7022	-0.000129
7023	-9.5e-05
7024	-9.1e-05
7025	-0.000129
7026	-0.000174
7027	-0.00022
7028	-0.000215
7029	-0.000196
7030	-0.000165
7031	-0.000166
7032	-0.000165
7033	-0.000178
7034	-0.000174
7035	-0.000171
7036	-0.000139
7037	-0.000129
7038	-0.000137
7039	-0.000132
7040	-0.000145
7041	-0.000182
7042	-0.000177
7043	-0.00016
7044	-0.000166
7045	-0.000191
7046	-0.000206
7047	-0.000223
7048	-0.00021
7049	-0.000173
7050	-0.000163
7051	-0.000199
7052	-0.000205
7053	-0.000176
7054	-0.000156
7055	-0.000108
7056	-0.000108
7057	-0.000148
7058	-0.00017
7059	-0.000157
7060	-0.000139
7061	-0.000112
7062	-0.000135
7063	-0.000152
7064	-0.000131
7065	-9.3e-05
7066	-5.9e-05
7067	-6.4e-05
7068	-8.7e-05
7069	-8.9e-05
7070	-8.5e-05
7071	-8.1e-05
7072	-9.7e-05
7073	-0.000113
7074	-0.000108
7075	-7.6e-05
7076	-7.8e-05
7077	-8.1e-05
7078	-7e-05
7079	-4.7e-05
7080	-5.9e-05
7081	-6.1e-05
7082	-7.9e-05
7083	-0.000106
7084	-0.000143
7085	-0.000141
7086	-0.000163
7087	-0.000186
7088	-0.000177
7089	-0.000176
7090	-0.000165
7091	-0.000187
7092	-0.000165
7093	-0.000133
7094	-9.6e-05
7095	-8.6e-05
7096	-8e-05
7097	-0.000108
7098	-0.0001
7099	-9e-05
7100	-7.7e-05
7101	-8.5e-05
7102	-7.4e-05
7103	-5.7e-05
7104	-5.1e-05
7105	-5e-05
7106	-4.5e-05
7107	-5.8e-05
7108	-7.4e-05
7109	-5.1e-05
7110	-1.2e-05
7111	8e-06
7112	-1.1e-05
7113	-2.1e-05
7114	-2e-06
7115	-8e-06
7116	-1.8e-05
7117	-4.4e-05
7118	-2.2e-05
7119	5.1e-05
7120	0.000112
7121	8e-05
7122	1.3e-05
7123	-2.9e-05
7124	-2.8e-05
7125	-1.7e-05
7126	-1.4e-05
7127	-1.9e-05
7128	-5.3e-05
7129	-5.7e-05
7130	-2e-05
7131	1.5e-05
7132	1.4e-05
7133	-9e-06
7134	0
7135	-2.4e-05
7136	-5.1e-05
7137	-6.2e-05
7138	-5.5e-05
7139	-4.1e-05
7140	-3.5e-05
7141	-5.4e-05
7142	-7.4e-05
7143	-6.5e-05
7144	-3e-05
7145	1.1e-05
7146	4.1e-05
7147	3.5e-05
7148	5e-06
7149	-8e-06
7150	4.2e-05
7151	7.6e-05
7152	6e-05
7153	3e-05
7154	4.4e-05
7155	6e-05
7156	5.4e-05
7157	7.3e-05
7158	0.000119
7159	0.000125
7160	0.000114
7161	6.2e-05
7162	4.1e-05
7163	4.1e-05
7164	3e-05
7165	2e-05
7166	1e-06
7167	2.3e-05
7168	4.5e-05
7169	4.1e-05
7170	3.8e-05
7171	6e-05
7172	6e-05
7173	5.8e-05
7174	1.3e-05
7175	-1.6e-05
7176	-5.5e-05
7177	-4.8e-05
7178	-5.3e-05
7179	-5.6e-05
7180	-7.2e-05
7181	-8.5e-05
7182	-8.2e-05
7183	-5.1e-05
7184	-2.1e-05
7185	-2.7e-05
7186	-6e-05
7187	-5.8e-05
7188	-2.6e-05
7189	-7e-06
7190	-1.1e-05
7191	-5.2e-05
7192	-7.5e-05
7193	-6.7e-05
7194	-6.9e-05
7195	-9.7e-05
7196	-0.000149
7197	-0.000188
7198	-0.000182
7199	-0.000161
7200	-0.000146
7201	-0.000129
7202	-9.7e-05
7203	-0.000101
7204	-0.000118
7205	-0.000111
7206	-0.000103
7207	-0.000122
7208	-0.00013
7209	-0.000136
7210	-9.5e-05
7211	-3.7e-05
7212	-3.5e-05
7213	-0.000121
7214	-0.000146
7215	-0.000103
7216	-0.00013
7217	-0.000158
7218	-0.000144
7219	-0.00011
7220	-8.5e-05
7221	-9.4e-05
7222	-0.000141
7223	-0.000147
7224	-0.000144
7225	-0.000111
7226	-9.6e-05
7227	-9.2e-05
7228	-8.6e-05
7229	-7.4e-05
7230	-5.1e-05
7231	-4.2e-05
7232	-7.3e-05
7233	-6.8e-05
7234	-2.2e-05
7235	1.2e-05
7236	-2.1e-05
7237	-4.3e-05
7238	-2.9e-05
7239	-3.5e-05
7240	-5.6e-05
7241	-1.9e-05
7242	-1e-06
7243	5e-06
7244	5.1e-05
7245	7.9e-05
7246	8.9e-05
7247	5.2e-05
7248	1e-05
7249	-3.1e-05
7250	-4e-05
7251	-3.3e-05
7252	-5.4e-05
7253	-0.0001
7254	-0.000132
7255	-0.000149
7256	-8.3e-05
7257	-3.9e-05
7258	-1e-06
7259	2.6e-05
7260	5e-06
7261	-3.3e-05
7262	-4.5e-05
7263	-4e-05
7264	-6.7e-05
7265	-7.1e-05
7266	-5.6e-05
7267	-3.4e-05
7268	-3.1e-05
7269	-2.4e-05
7270	-3e-06
7271	4e-05
7272	7.4e-05
7273	4.7e-05
7274	3.9e-05
7275	6.8e-05
7276	5.1e-05
7277	3.9e-05
7278	5.6e-05
7279	6.1e-05
7280	4.9e-05
7281	3.8e-05
7282	4e-05
7283	7.3e-05
7284	6.1e-05
7285	4.5e-05
7286	4e-05
7287	4.1e-05
7288	5.3e-05
7289	7.7e-05
7290	0.000102
7291	8.5e-05
7292	4.5e-05
7293	4.2e-05
7294	6.8e-05
7295	9.4e-05
7296	7.1e-05
7297	7.9e-05
7298	8.5e-05
7299	0.000111
7300	7.2e-05
7301	5.1e-05
7302	9e-05
7303	0.000162
7304	0.000199
7305	0.000223
7306	0.000193
7307	0.000102
7308	3.8e-05
7309	3.7e-05
7310	8.2e-05
7311	0.0001
7312	7e-05
7313	1.6e-05
7314	2.7e-05
7315	6.2e-05
7316	0.000144
7317	0.000184
7318	0.000123
7319	6.4e-05
7320	5.2e-05
7321	8.5e-05
7322	0.00013
7323	0.000173
7324	0.000192
7325	0.000126
7326	6.5e-05
7327	5e-05
7328	0.0001
7329	0.000119
7330	0.000116
7331	9.6e-05
7332	5.8e-05
7333	6.1e-05
7334	3.4e-05
7335	2.3e-05
7336	-1.3e-05
7337	5.2e-05
7338	8.7e-05
7339	0.000109
7340	0.000134
7341	0.000172
7342	0.000152
7343	0.00014
7344	0.00019
7345	0.000212
7346	0.000204
7347	0.00018
7348	0.000194
7349	0.000191
7350	0.000159
7351	0.000141
7352	0.000162
7353	0.000153
7354	9.4e-05
7355	5.8e-05
7356	8.2e-05
7357	0.000105
7358	7.9e-05
7359	5.1e-05
7360	5.4e-05
7361	8.6e-05
7362	5.8e-05
7363	2.9e-05
7364	3e-06
7365	3.5e-05
7366	6.6e-05
7367	6.8e-05
7368	3.5e-05
7369	9e-06
7370	1e-06
7371	2.7e-05
7372	3.4e-05
7373	7.3e-05
7374	5.6e-05
7375	1.6e-05
7376	1e-06
7377	-8e-06
7378	-3.9e-05
7379	-8.1e-05
7380	-9.7e-05
7381	-5.3e-05
7382	-7.3e-05
7383	-9.4e-05
7384	-6.6e-05
7385	-1e-05
7386	-3e-06
7387	-8e-06
7388	-6.9e-05
7389	-0.000105
7390	-8.3e-05
7391	-7.4e-05
7392	-6.4e-05
7393	-7.6e-05
7394	-9.6e-05
7395	-7.8e-05
7396	-3.3e-05
7397	-2.7e-05
7398	0
7399	1.3e-05
7400	4.1e-05
7401	7.3e-05
7402	0.000114
7403	0.000136
7404	0.000133
7405	0.000107
7406	5.7e-05
7407	6.2e-05
7408	8.2e-05
7409	7.6e-05
7410	6.1e-05
7411	4.8e-05
7412	2e-05
7413	-2.6e-05
7414	-3e-05
7415	1.2e-05
7416	4.7e-05
7417	8.1e-05
7418	9.5e-05
7419	9.2e-05
7420	9.4e-05
7421	0.000127
7422	0.00015
7423	0.000176
7424	0.000189
7425	0.000174
7426	0.000143
7427	0.0001
7428	3.9e-05
7429	2.3e-05
7430	7e-06
7431	1.2e-05
7432	5.1e-05
7433	9.8e-05
7434	0.00014
7435	0.000128
7436	8.7e-05
7437	0.000106
7438	9.8e-05
7439	3e-05
7440	-5.9e-05
7441	-7e-05
7442	-1.3e-05
7443	2.9e-05
7444	4.5e-05
7445	2.6e-05
7446	5.7e-05
7447	0.000139
7448	0.00022
7449	0.000236
7450	0.000228
7451	0.000171
7452	9.1e-05
7453	1.8e-05
7454	4.1e-05
7455	5.5e-05
7456	8.2e-05
7457	8.2e-05
7458	8.4e-05
7459	7.1e-05
7460	0.000103
7461	0.00011
7462	9.1e-05
7463	7.3e-05
7464	8.9e-05
7465	0.000122
7466	0.00013
7467	8.9e-05
7468	5e-05
7469	-4e-06
7470	-3.5e-05
7471	1.3e-05
7472	5.3e-05
7473	8.3e-05
7474	8.9e-05
7475	8.3e-05
7476	4.6e-05
7477	5.7e-05
7478	5.7e-05
7479	7.6e-05
7480	5.7e-05
7481	9.4e-05
7482	0.00014
7483	0.000144
7484	0.000115
7485	0.000116
7486	0.000148
7487	0.000174
7488	0.000155
7489	0.000163
7490	0.00016
7491	0.000109
7492	6.2e-05
7493	0.000111
7494	0.000123
7495	0.000111
7496	0.000135
7497	0.00016
7498	0.000189
7499	0.000183
7500	0.000199
7501	0.000209
7502	0.000196
7503	0.000177
7504	0.000185
7505	0.000209
7506	0.000211
7507	0.000164
7508	0.00017
7509	0.000223
7510	0.000242
7511	0.000186
7512	0.000153
7513	0.000145
7514	0.000206
7515	0.000237
7516	0.00023
7517	0.000208
7518	0.000237
7519	0.000266
7520	0.000233
7521	0.000193
7522	0.000162
7523	0.000173
7524	0.00025
7525	0.000284
7526	0.000257
7527	0.000234
7528	0.000255
7529	0.000263
7530	0.000231
7531	0.000174
7532	0.000159
7533	0.000182
7534	0.000214
7535	0.000188
7536	0.0002
7537	0.000221
7538	0.000236
7539	0.000236
7540	0.000206
7541	0.000155
7542	0.000165
7543	0.000228
7544	0.000271
7545	0.000268
7546	0.000266
7547	0.000258
7548	0.000209
7549	0.000186
7550	0.00019
7551	0.000232
7552	0.000251
7553	0.000224
7554	0.000215
7555	0.000207
7556	0.000194
7557	0.000204
7558	0.000229
7559	0.000224
7560	0.000221
7561	0.000174
7562	0.000135
7563	0.00015
7564	0.0002
7565	0.000249
7566	0.000302
7567	0.000369
7568	0.00039
7569	0.000316
7570	0.000246
7571	0.000209
7572	0.000206
7573	0.000178
7574	0.000183
7575	0.0002
7576	0.000245
7577	0.000297
7578	0.000314
7579	0.000292
7580	0.000255
7581	0.000217
7582	0.000239
7583	0.000242
7584	0.000214
7585	0.000193
7586	0.000174
7587	0.000145
7588	0.000124
7589	0.00012
7590	0.000185
7591	0.000252
7592	0.000261
7593	0.000228
7594	0.000211
7595	0.000194
7596	0.000185
7597	0.000143
7598	0.000144
7599	0.00017
7600	0.00017
7601	0.000143
7602	0.000132
7603	0.000164
7604	0.00021
7605	0.000245
7606	0.000232
7607	0.000197
7608	0.00018
7609	0.000178
7610	0.00019
7611	0.000173
7612	0.000133
7613	6.7e-05
7614	7.2e-05
7615	0.000124
7616	0.000182
7617	0.000198
7618	0.00023
7619	0.000259
7620	0.000246
7621	0.000212
7622	0.000184
7623	0.000201
7624	0.000203
7625	0.000233
7626	0.000237
7627	0.000206
7628	0.000203
7629	0.0002
7630	0.000219
7631	0.000258
7632	0.00024
7633	0.000195
7634	0.000162
7635	0.000139
7636	0.000165
7637	0.000165
7638	0.000164
7639	0.000162
7640	0.000162
7641	0.000161
7642	0.000205
7643	0.000227
7644	0.000219
7645	0.000203
7646	0.000191
7647	0.000158
7648	0.0001
7649	9.6e-05
7650	0.000107
7651	0.000149
7652	0.000178
7653	0.000189
7654	0.000182
7655	0.000155
7656	0.000119
7657	0.000103
7658	0.000105
7659	0.000111
7660	0.000106
7661	0.000147
7662	0.000181
7663	0.000201
7664	0.000208
7665	0.000168
7666	0.000132
7667	0.000187
7668	0.000197
7669	0.000148
7670	0.000134
7671	0.000158
7672	0.000223
7673	0.00025
7674	0.000223
7675	0.000208
7676	0.00018
7677	0.000143
7678	0.000122
7679	0.000166
7680	0.000194
7681	0.000208
7682	0.000201
7683	0.000175
7684	0.000187
7685	0.000167
7686	0.000106
7687	9.7e-05
7688	0.000119
7689	0.000133
7690	0.000178
7691	0.000215
7692	0.000211
7693	0.00017
7694	0.000118
7695	0.000133
7696	0.000142
7697	0.000129
7698	5.9e-05
7699	2.6e-05
7700	6.8e-05
7701	0.000114
7702	0.000128
7703	0.00013
7704	0.000124
7705	0.00014
7706	0.000156
7707	0.000156
7708	0.000148
7709	0.000157
7710	0.000155
7711	0.000158
7712	0.000196
7713	0.000225
7714	0.000209
7715	0.000216
7716	0.000236
7717	0.000238
7718	0.000236
7719	0.000216
7720	0.000213
7721	0.000239
7722	0.00023
7723	0.000196
7724	0.00014
7725	0.000122
7726	0.000114
7727	0.000129
7728	0.000121
7729	0.000125
7730	0.000141
7731	0.000165
7732	0.000127
7733	9.5e-05
7734	0.000108
7735	0.000118
7736	0.000136
7737	0.000161
7738	0.000125
7739	7.7e-05
7740	2.1e-05
7741	3.7e-05
7742	8.7e-05
7743	0.000126
7744	0.000173
7745	0.000168
7746	0.000141
7747	0.000209
7748	0.000247
7749	0.000241
7750	0.0002
7751	0.000184
7752	0.000193
7753	0.000201
7754	0.000219
7755	0.0002
7756	0.000203
7757	0.000246
7758	0.000229
7759	0.000211
7760	0.000246
7761	0.000239
7762	0.000238
7763	0.000218
7764	0.000184
7765	0.000154
7766	0.000118
7767	0.000107
7768	0.000114
7769	0.000163
7770	0.000165
7771	0.000146
7772	0.00013
7773	0.000116
7774	0.000127
7775	0.000172
7776	0.000177
7777	0.000173
7778	0.000178
7779	0.000184
7780	0.000216
7781	0.000247
7782	0.000242
7783	0.00019
7784	0.000128
7785	0.000137
7786	0.000185
7787	0.00019
7788	0.000182
7789	0.00019
7790	0.000218
7791	0.000238
7792	0.000251
7793	0.000248
7794	0.000217
7795	0.000195
7796	0.000196
7797	0.000184
7798	0.000148
7799	0.000136
7800	0.000155
7801	0.000179
7802	0.000166
7803	0.000141
7804	0.000127
7805	7.4e-05
7806	7.3e-05
7807	7.2e-05
7808	8.8e-05
7809	8.5e-05
7810	3.7e-05
7811	5.5e-05
7812	3.2e-05
7813	4.5e-05
7814	6.6e-05
7815	6.9e-05
7816	6.9e-05
7817	8.3e-05
7818	0.000112
7819	0.000147
7820	0.000188
7821	0.0002
7822	0.000206
7823	0.000203
7824	0.000201
7825	0.00017
7826	0.000129
7827	0.000145
7828	0.000137
7829	0.0001
7830	6.8e-05
7831	4.9e-05
7832	7e-06
7833	-1.1e-05
7834	-6e-05
7835	-8e-05
7836	-6.5e-05
7837	-1.9e-05
7838	4e-06
7839	-1e-06
7840	2.7e-05
7841	4.1e-05
7842	5.4e-05
7843	3.1e-05
7844	2e-05
7845	-1.3e-05
7846	-6.4e-05
7847	-6.6e-05
7848	-5.4e-05
7849	-4.6e-05
7850	-4.9e-05
7851	-5.2e-05
7852	-1.8e-05
7853	-7e-06
7854	3.6e-05
7855	1e-05
7856	-2.8e-05
7857	-7e-06
7858	4.6e-05
7859	2e-05
7860	1.4e-05
7861	6.5e-05
7862	0.000129
7863	0.000118
7864	5.9e-05
7865	6.5e-05
7866	5.5e-05
7867	7.2e-05
7868	6.4e-05
7869	4e-05
7870	5e-05
7871	0.000131
7872	0.000144
7873	0.000109
7874	6.6e-05
7875	6.3e-05
7876	0.000123
7877	0.000166
7878	0.000119
7879	0.000103
7880	0.000128
7881	0.000129
7882	0.000131
7883	0.00014
7884	0.00015
7885	9e-05
7886	8.4e-05
7887	9.9e-05
7888	7.6e-05
7889	6.3e-05
7890	8.1e-05
7891	0.000109
7892	0.000134
7893	0.000178
7894	0.000181
7895	0.00016
7896	0.000159
7897	0.00018
7898	0.000156
7899	0.000163
7900	0.00017
7901	0.0002
7902	0.000182
7903	0.000142
7904	0.00011
7905	0.000102
7906	0.000114
7907	0.000119
7908	0.00016
7909	0.000198
7910	0.000237
7911	0.000235
7912	0.000198
7913	0.000189
7914	0.000178
7915	0.000152
7916	0.000119
7917	0.000114
7918	0.000137
7919	0.000143
7920	0.000139
7921	0.000168
7922	0.000157
7923	0.00012
7924	0.000129
7925	0.000147
7926	0.00019
7927	0.000178
7928	0.000159
7929	0.000169
7930	0.000156
7931	0.000163
7932	0.000202
7933	0.000242
7934	0.000214
7935	0.000162
7936	0.000177
7937	0.000193
7938	0.000182
7939	0.00018
7940	0.000194
7941	0.000211
7942	0.000186
7943	0.000137
7944	0.000108
7945	0.000125
7946	0.00018
7947	0.00026
7948	0.00027
7949	0.000273
7950	0.000229
7951	0.000225
7952	0.000222
7953	0.000217
7954	0.000202
7955	0.000189
7956	0.000192
7957	0.000159
7958	0.000102
7959	0.0001
7960	0.000121
7961	0.000121
7962	0.000118
7963	0.000138
7964	0.000117
7965	0.00011
7966	8.5e-05
7967	6.8e-05
7968	5.7e-05
7969	9e-05
7970	0.000117
7971	0.000136
7972	0.00015
7973	0.00013
7974	6.7e-05
7975	5.6e-05
7976	9.8e-05
7977	0.000104
7978	0.000112
7979	0.000143
7980	0.000143
7981	0.000138
7982	0.000138
7983	0.000153
7984	0.000173
7985	0.000213
7986	0.000232
7987	0.000212
7988	0.000174
7989	0.00014
7990	9.1e-05
7991	5.3e-05
7992	4.4e-05
7993	6.1e-05
7994	8.3e-05
7995	0.000132
7996	0.00011
7997	7.2e-05
7998	4.8e-05
[truncated: 3,401 more rows]

## Sheet: G344dC
Time	UV
6000	0.01141
6001	0.01142
6002	0.011413
6003	0.011394
6004	0.011368
6005	0.011444
6006	0.011528
6007	0.011565
6008	0.011548
6009	0.011504
6010	0.011474
6011	0.011443
6012	0.011412
6013	0.01139
6014	0.011375
6015	0.011404
6016	0.011428
6017	0.011422
6018	0.011377
6019	0.011352
6020	0.011388
6021	0.011416
6022	0.011424
6023	0.011404
6024	0.01136
6025	0.011326
6026	0.011363
6027	0.011417
6028	0.011457
6029	0.011459
6030	0.011474
6031	0.011472
6032	0.011493
6033	0.011538
6034	0.011539
6035	0.011518
6036	0.011535
6037	0.011573
6038	0.01155
6039	0.011494
6040	0.011535
6041	0.011579
6042	0.011613
6043	0.011629
6044	0.011643
6045	0.011672
6046	0.011666
6047	0.011626
6048	0.011578
6049	0.011523
6050	0.011484
6051	0.011456
6052	0.011461
6053	0.011485
6054	0.011543
6055	0.011569
6056	0.011534
6057	0.011484
6058	0.011443
6059	0.011453
6060	0.011467
6061	0.011487
6062	0.01153
6063	0.01154
6064	0.011515
6065	0.011553
6066	0.011552
6067	0.011521
6068	0.011499
6069	0.011528
6070	0.011567
6071	0.011584
6072	0.011553
6073	0.011515
6074	0.011485
6075	0.011492
6076	0.011506
6077	0.011515
6078	0.011525
6079	0.011531
6080	0.011518
6081	0.011516
6082	0.011509
6083	0.011512
6084	0.011515
6085	0.011504
6086	0.011504
6087	0.011512
6088	0.011539
6089	0.011557
6090	0.011564
6091	0.011545
6092	0.011516
6093	0.011472
6094	0.011447
6095	0.011399
6096	0.011384
6097	0.011373
6098	0.011346
6099	0.011298
6100	0.011299
6101	0.011331
6102	0.011368
6103	0.011334
6104	0.011357
6105	0.011434
6106	0.011473
6107	0.01148
6108	0.01147
6109	0.011444
6110	0.011407
6111	0.0114
6112	0.011409
6113	0.01134
6114	0.011316
6115	0.011331
6116	0.011337
6117	0.01132
6118	0.011297
6119	0.011298
6120	0.011361
6121	0.011429
6122	0.011441
6123	0.011468
6124	0.011481
6125	0.011471
6126	0.011451
6127	0.011446
6128	0.011461
6129	0.011432
6130	0.011385
6131	0.011367
6132	0.011354
6133	0.011351
6134	0.011329
6135	0.01136
6136	0.011396
6137	0.011413
6138	0.011401
6139	0.011403
6140	0.011372
6141	0.011316
6142	0.011286
6143	0.011322
6144	0.011333
6145	0.011363
6146	0.011316
6147	0.011328
6148	0.01137
6149	0.011366
6150	0.011374
6151	0.01137
6152	0.011364
6153	0.011381
6154	0.011363
6155	0.01134
6156	0.011363
6157	0.0114
6158	0.011429
6159	0.011428
6160	0.011414
6161	0.011427
6162	0.011449
6163	0.011414
6164	0.011366
6165	0.011357
6166	0.011407
6167	0.011435
6168	0.011416
6169	0.011397
6170	0.011393
6171	0.011393
6172	0.011435
6173	0.011425
6174	0.01138
6175	0.011398
6176	0.011358
6177	0.011327
6178	0.011343
6179	0.011381
6180	0.011409
6181	0.011435
6182	0.011441
6183	0.011407
6184	0.011422
6185	0.011453
6186	0.011486
6187	0.011505
6188	0.011538
6189	0.011515
6190	0.011488
6191	0.011476
6192	0.011502
6193	0.011548
6194	0.01155
6195	0.011499
6196	0.011462
6197	0.011474
6198	0.011516
6199	0.011501
6200	0.011502
6201	0.011502
6202	0.011517
6203	0.011531
6204	0.011562
6205	0.011583
6206	0.011621
6207	0.011645
6208	0.011601
6209	0.011498
6210	0.011437
6211	0.011421
6212	0.01144
6213	0.011499
6214	0.011523
6215	0.011515
6216	0.01152
6217	0.011533
6218	0.011532
6219	0.011543
6220	0.011537
6221	0.011511
6222	0.011495
6223	0.011482
6224	0.011524
6225	0.011565
6226	0.011574
6227	0.011569
6228	0.011537
6229	0.011516
6230	0.011486
6231	0.011421
6232	0.011372
6233	0.01136
6234	0.01134
6235	0.011338
6236	0.011358
6237	0.011366
6238	0
6239	0
6240	-3.1e-05
6241	-8.2e-05
6242	-0.000147
6243	-0.000136
6244	-5.3e-05
6245	-2e-06
6246	2e-06
6247	-1.1e-05
6248	5e-06
6249	2e-06
6250	2.2e-05
6251	5.9e-05
6252	0.000102
6253	0.000161
6254	0.000165
6255	0.000156
6256	0.000138
6257	0.000117
6258	0.000106
6259	0.000122
6260	0.000109
6261	5.4e-05
6262	5e-06
6263	-4.3e-05
6264	-4.5e-05
6265	-5.1e-05
6266	-5.2e-05
6267	-3.3e-05
6268	-3e-05
6269	-4.4e-05
6270	-6.7e-05
6271	-4.1e-05
6272	-6.1e-05
6273	-0.000115
6274	-0.000139
6275	-0.000151
6276	-0.000166
6277	-0.000156
6278	-0.000133
6279	-0.000118
6280	-0.00011
6281	-0.000104
6282	-6.4e-05
6283	-2e-05
6284	-2e-05
6285	-2.6e-05
6286	-1.7e-05
6287	-2.1e-05
6288	-8e-06
6289	7e-06
6290	-3.4e-05
6291	-3.2e-05
6292	-3e-05
6293	-7.7e-05
6294	-9.4e-05
6295	-6e-05
6296	-3.9e-05
6297	-3.2e-05
6298	-2.8e-05
6299	-1.2e-05
6300	-2.2e-05
6301	-7.9e-05
6302	-0.000142
6303	-0.000104
6304	-7.3e-05
6305	-9.2e-05
6306	-9e-05
6307	-5.8e-05
6308	-2.4e-05
6309	-2.9e-05
6310	-3.2e-05
6311	-1.2e-05
6312	1.1e-05
6313	1.5e-05
6314	1.9e-05
6315	1.2e-05
6316	1.9e-05
6317	3.9e-05
6318	1.5e-05
6319	-2.4e-05
6320	-8.7e-05
6321	-7e-05
6322	-1.2e-05
6323	2.4e-05
6324	-1.2e-05
6325	-6.5e-05
6326	-0.000153
6327	-0.000173
6328	-0.000144
6329	-8.3e-05
6330	-9.3e-05
6331	-0.000119
6332	-0.000112
6333	-7.6e-05
6334	-1.8e-05
6335	-9e-06
6336	-3.8e-05
6337	-3.3e-05
6338	-1.9e-05
6339	-1.4e-05
6340	3e-05
6341	5.4e-05
6342	6e-05
6343	7e-05
6344	7.4e-05
6345	9.8e-05
6346	9.8e-05
6347	7.6e-05
6348	4.8e-05
6349	4.7e-05
6350	5.2e-05
6351	3.6e-05
6352	4.1e-05
6353	4.5e-05
6354	4e-06
6355	-1.6e-05
6356	3.3e-05
6357	3.7e-05
6358	3.4e-05
6359	2.8e-05
6360	4.8e-05
6361	5.5e-05
6362	6.1e-05
6363	1.8e-05
6364	1.2e-05
6365	2.5e-05
6366	5.4e-05
6367	6.6e-05
6368	1.6e-05
6369	-4.2e-05
6370	-6.2e-05
6371	-2e-06
6372	4.4e-05
6373	4e-05
6374	0
6375	-2.3e-05
6376	2e-06
6377	-6e-06
6378	-7.4e-05
6379	-0.000108
6380	-7.6e-05
6381	-3.3e-05
6382	-1.6e-05
6383	1.8e-05
6384	1.2e-05
6385	-5.5e-05
6386	-9.5e-05
6387	-9.2e-05
6388	-7.2e-05
6389	-7.6e-05
6390	-8.5e-05
6391	-0.000125
6392	-0.000168
6393	-0.000157
6394	-0.000134
6395	-0.000131
6396	-0.000118
6397	-0.000136
6398	-0.000156
6399	-0.000157
6400	-0.000129
6401	-0.000142
6402	-0.00017
6403	-0.00019
6404	-0.000183
6405	-0.00018
6406	-0.000144
6407	-0.000131
6408	-0.000116
6409	-0.000166
6410	-0.000215
6411	-0.000228
6412	-0.000182
6413	-0.000138
6414	-0.000163
6415	-0.000154
6416	-0.000121
6417	-0.000128
6418	-0.000108
6419	-0.000106
6420	-0.000102
6421	-0.000124
6422	-0.000208
6423	-0.000258
6424	-0.000218
6425	-0.00016
6426	-0.000167
6427	-0.000137
6428	-9.3e-05
6429	-6.3e-05
6430	-9.4e-05
6431	-7.6e-05
6432	-6e-05
6433	-6.3e-05
6434	-0.000131
6435	-0.000141
6436	-4.1e-05
6437	3.7e-05
6438	3.6e-05
6439	4e-06
6440	-3.1e-05
6441	-7.3e-05
6442	-6.7e-05
6443	-9.4e-05
6444	-0.000116
6445	-7.6e-05
6446	-1e-05
6447	7e-06
6448	-1.5e-05
6449	-2.8e-05
6450	-2.8e-05
6451	-1e-05
6452	1.7e-05
6453	4.5e-05
6454	6.9e-05
6455	6.3e-05
6456	4.3e-05
6457	9e-05
6458	0.000143
6459	0.000149
6460	0.00011
6461	7.2e-05
6462	3.4e-05
6463	3.6e-05
6464	3.1e-05
6465	-1.6e-05
6466	-3.7e-05
6467	-6e-06
6468	6.2e-05
6469	0.000103
6470	0.000136
6471	0.000156
6472	0.000146
6473	0.000164
6474	0.0002
6475	0.000177
6476	0.000136
6477	0.000129
6478	0.000155
6479	0.000171
6480	0.000158
6481	0.000179
6482	0.000178
6483	0.000142
6484	9e-05
6485	6.1e-05
6486	7.5e-05
6487	0.00012
6488	0.000129
6489	0.000104
6490	7.6e-05
6491	6.8e-05
6492	5.7e-05
6493	5.6e-05
6494	5.6e-05
6495	5.1e-05
6496	-1.8e-05
6497	-3e-05
6498	3e-06
6499	2.9e-05
6500	-1.7e-05
6501	-0.000123
6502	-0.000155
6503	-0.0001
6504	-5.4e-05
6505	-1.3e-05
6506	-8e-06
6507	-5.3e-05
6508	-8.5e-05
6509	-6e-05
6510	-3.3e-05
6511	-5.8e-05
6512	-3.2e-05
6513	2.9e-05
6514	3e-06
6515	-4.8e-05
6516	-7.4e-05
6517	-1.6e-05
6518	3.3e-05
6519	8.9e-05
6520	7.9e-05
6521	6e-05
6522	4.1e-05
6523	3.9e-05
6524	1.6e-05
6525	3e-06
6526	2.3e-05
6527	4.2e-05
6528	8.7e-05
6529	0.000102
6530	0.000117
6531	9.2e-05
6532	4.3e-05
6533	2.7e-05
6534	5.8e-05
6535	8e-05
6536	9.2e-05
6537	5.4e-05
6538	-1.1e-05
6539	-3e-06
6540	4.4e-05
6541	3.5e-05
6542	-2e-05
6543	-7e-05
6544	-7.3e-05
6545	-7.6e-05
6546	-3.3e-05
6547	-3.6e-05
6548	-8.7e-05
6549	-0.000117
6550	-0.000137
6551	-0.000171
6552	-0.000185
6553	-0.000134
6554	-5.8e-05
6555	-1.5e-05
6556	-3.8e-05
6557	-4.9e-05
6558	-3.3e-05
6559	-5e-05
6560	-7.6e-05
6561	-8e-05
6562	-4.1e-05
6563	-3.8e-05
6564	-5.1e-05
6565	-8.5e-05
6566	-0.000136
6567	-0.000156
6568	-0.000157
6569	-0.000161
6570	-0.000171
6571	-9.1e-05
6572	-3.2e-05
6573	-4e-05
6574	-7.7e-05
6575	-0.000102
6576	-0.000118
6577	-0.000182
6578	-0.000226
6579	-0.000209
6580	-0.000179
6581	-0.000158
6582	-0.000129
6583	-9.8e-05
6584	-0.000147
6585	-0.000238
6586	-0.000278
6587	-0.000278
6588	-0.000255
6589	-0.00024
6590	-0.000242
6591	-0.000265
6592	-0.000222
6593	-0.000176
6594	-0.000153
6595	-0.000149
6596	-0.000217
6597	-0.000311
6598	-0.000325
6599	-0.000282
6600	-0.000258
6601	-0.000242
6602	-0.000243
6603	-0.00022
6604	-0.000201
6605	-0.000233
6606	-0.000278
6607	-0.000275
6608	-0.000239
6609	-0.000221
6610	-0.000191
6611	-0.000195
6612	-0.000237
6613	-0.000281
6614	-0.000274
6615	-0.000258
6616	-0.000227
6617	-0.000207
6618	-0.000184
6619	-0.000164
6620	-0.000182
6621	-0.000232
6622	-0.000254
6623	-0.000241
6624	-0.000194
6625	-0.00018
6626	-0.000159
6627	-0.000156
6628	-0.000172
6629	-0.000148
6630	-0.000126
6631	-0.000116
6632	-0.00014
6633	-0.000142
6634	-0.000131
6635	-0.000117
6636	-0.000144
6637	-0.000145
6638	-0.00014
6639	-0.000141
6640	-9.7e-05
6641	-6.1e-05
6642	-9e-05
6643	-0.000122
6644	-0.000108
6645	-8.3e-05
6646	-6.5e-05
6647	-8.8e-05
6648	-9.9e-05
6649	-8.5e-05
6650	-8e-05
6651	-2.3e-05
6652	-4.8e-05
6653	-5.9e-05
6654	-6.9e-05
6655	-3e-05
6656	-2.4e-05
6657	-4.2e-05
6658	-5.6e-05
6659	-5.5e-05
6660	-3.1e-05
6661	-3.2e-05
6662	-3.8e-05
6663	-9.4e-05
6664	-0.000148
6665	-0.000171
6666	-0.000119
6667	-0.000115
6668	-0.000112
6669	-9.1e-05
6670	-8.9e-05
6671	-0.000101
6672	-0.000134
6673	-0.0001
6674	-5.7e-05
6675	-4.5e-05
6676	-5.7e-05
6677	-5.6e-05
6678	-6.3e-05
6679	-2.5e-05
6680	2.2e-05
6681	4.1e-05
6682	2.4e-05
6683	0
6684	-6.9e-05
6685	-5.1e-05
6686	-1.2e-05
6687	-2.6e-05
6688	-7.2e-05
6689	-0.000102
6690	-6.2e-05
6691	9e-06
6692	2e-06
6693	-5.1e-05
6694	-9.5e-05
6695	-8.6e-05
6696	-6.4e-05
6697	-5.5e-05
6698	-5.7e-05
6699	-5e-05
6700	-8.3e-05
6701	-8.7e-05
6702	-8.6e-05
6703	-0.000136
6704	-0.000165
6705	-0.000168
6706	-0.000153
6707	-0.000202
6708	-0.000218
6709	-0.00016
6710	-0.000102
6711	-0.000105
6712	-0.000124
6713	-0.000114
6714	-0.000108
6715	-0.000105
6716	-0.000109
6717	-0.000123
6718	-0.00013
6719	-0.000139
6720	-0.00014
6721	-0.00014
6722	-0.000157
6723	-0.000175
6724	-0.000158
6725	-0.000106
6726	-9.8e-05
6727	-8.9e-05
6728	-8.8e-05
6729	-6.9e-05
6730	-6e-05
6731	-3.7e-05
6732	-1.7e-05
6733	-5.7e-05
6734	-9.7e-05
6735	-9.2e-05
6736	-5.1e-05
6737	-9e-05
6738	-0.000168
6739	-0.000168
6740	-8.2e-05
6741	-6.3e-05
6742	-8.4e-05
6743	-0.000111
6744	-0.000144
6745	-0.000169
6746	-0.000169
6747	-0.00018
6748	-0.000184
6749	-0.000173
6750	-0.000136
6751	-0.000134
6752	-0.00017
6753	-0.000194
6754	-0.000231
6755	-0.000198
6756	-0.000144
6757	-7.8e-05
6758	-7.1e-05
6759	-5.8e-05
6760	-5.5e-05
6761	-4.8e-05
6762	-4.3e-05
6763	-7.8e-05
6764	-8.6e-05
6765	-0.000108
6766	-0.000108
6767	-9.7e-05
6768	-5.9e-05
6769	-6.2e-05
6770	-0.000103
6771	-8e-05
6772	-2.4e-05
6773	-2.7e-05
6774	-5.2e-05
6775	-6.3e-05
6776	-5.2e-05
6777	-1.1e-05
6778	8e-06
6779	5e-06
6780	8e-06
6781	-9e-06
6782	-2.2e-05
6783	1e-06
6784	8.5e-05
6785	0.000111
6786	3.7e-05
6787	-3e-06
6788	1.5e-05
6789	2.8e-05
6790	-2e-06
6791	-2.8e-05
6792	-4e-05
6793	-3e-06
6794	1.1e-05
6795	1.5e-05
6796	-1.6e-05
6797	-7.4e-05
6798	-8.4e-05
6799	-5.7e-05
6800	-8e-06
6801	-3.7e-05
6802	-2.6e-05
6803	-2.7e-05
6804	-3.2e-05
6805	-4e-05
6806	1.3e-05
6807	9e-06
6808	-3e-06
6809	-1.7e-05
6810	-1.9e-05
6811	1.6e-05
6812	9.5e-05
6813	0.000106
6814	0.000113
6815	0.000102
6816	9.9e-05
6817	9.9e-05
6818	9.8e-05
6819	7.8e-05
6820	6.6e-05
6821	6.2e-05
6822	8.3e-05
6823	7.4e-05
6824	8.4e-05
6825	0.000101
6826	6.2e-05
6827	5.6e-05
6828	4.5e-05
6829	2.6e-05
6830	2.2e-05
6831	2.3e-05
6832	6.1e-05
6833	0.000105
6834	8.7e-05
6835	7.4e-05
6836	0.0001
6837	0.000122
6838	0.000112
6839	8.7e-05
6840	6.3e-05
6841	4.8e-05
6842	7.6e-05
6843	8e-05
6844	3.7e-05
6845	3.4e-05
6846	6.3e-05
6847	9.7e-05
6848	0.000139
6849	0.000181
6850	0.00017
6851	0.000132
6852	0.000125
6853	0.000125
6854	0.000184
6855	0.000219
6856	0.000187
6857	0.000192
6858	0.000196
6859	0.000229
6860	0.000223
6861	0.000221
6862	0.000237
6863	0.000257
6864	0.000281
6865	0.000286
6866	0.000276
6867	0.000232
6868	0.000231
6869	0.000294
6870	0.000301
6871	0.000276
6872	0.000276
6873	0.000295
6874	0.000322
6875	0.000335
6876	0.000317
6877	0.000339
6878	0.00036
6879	0.000327
6880	0.000313
6881	0.000354
6882	0.000394
6883	0.00042
6884	0.000403
6885	0.000382
6886	0.000396
6887	0.000356
6888	0.000264
6889	0.000222
6890	0.000237
6891	0.00023
6892	0.000251
6893	0.000313
6894	0.00032
6895	0.000283
6896	0.000313
6897	0.000333
6898	0.000309
6899	0.000272
6900	0.000263
6901	0.000278
6902	0.000274
6903	0.00024
6904	0.000268
6905	0.000274
6906	0.000287
6907	0.000326
6908	0.000393
6909	0.000446
6910	0.000459
6911	0.000455
6912	0.000375
6913	0.000301
6914	0.000282
6915	0.000296
6916	0.000354
6917	0.000391
6918	0.000391
6919	0.000342
6920	0.000369
6921	0.000412
6922	0.000439
6923	0.000423
6924	0.000356
6925	0.000316
6926	0.000323
6927	0.000368
6928	0.000394
6929	0.000473
6930	0.0005
6931	0.0005
6932	0.000522
6933	0.000495
6934	0.0004
6935	0.000358
6936	0.000353
6937	0.000396
6938	0.000444
6939	0.000462
6940	0.00041
6941	0.000384
6942	0.000389
6943	0.000399
6944	0.000399
6945	0.000434
6946	0.000408
6947	0.000349
6948	0.000331
6949	0.000332
6950	0.000363
6951	0.000408
6952	0.000384
6953	0.000319
6954	0.000283
6955	0.000287
6956	0.0003
6957	0.000301
6958	0.000322
6959	0.000322
6960	0.000301
6961	0.000295
6962	0.000303
6963	0.000332
6964	0.000337
6965	0.000346
6966	0.00037
6967	0.000372
6968	0.000389
6969	0.000399
6970	0.00038
6971	0.000397
6972	0.00047
6973	0.000476
6974	0.000427
6975	0.000427
6976	0.000453
6977	0.000397
6978	0.000351
6979	0.000351
6980	0.000345
6981	0.000352
6982	0.000387
6983	0.000403
6984	0.000418
6985	0.000416
6986	0.000377
6987	0.000312
6988	0.000319
6989	0.000317
6990	0.000307
6991	0.00031
6992	0.000332
6993	0.000365
6994	0.000368
6995	0.000362
6996	0.000348
6997	0.000291
6998	0.000252
6999	0.000252
7000	0.000277
7001	0.000277
7002	0.000273
7003	0.000249
7004	0.000227
7005	0.000199
7006	0.00018
7007	0.000207
7008	0.000234
7009	0.000227
7010	0.000254
7011	0.000288
7012	0.000323
7013	0.000372
7014	0.000373
7015	0.000322
7016	0.000299
7017	0.000308
7018	0.000346
7019	0.000355
7020	0.000331
7021	0.00036
7022	0.000386
7023	0.000388
7024	0.00036
7025	0.000354
7026	0.000372
7027	0.000404
7028	0.000404
7029	0.000434
7030	0.000479
7031	0.000521
7032	0.000497
7033	0.000458
7034	0.000405
7035	0.000371
7036	0.000351
7037	0.000388
7038	0.000427
7039	0.000461
7040	0.000438
7041	0.000425
7042	0.000444
7043	0.000462
7044	0.000484
7045	0.000519
7046	0.000524
7047	0.000485
7048	0.00042
7049	0.000392
7050	0.0004
7051	0.000403
7052	0.000428
7053	0.000456
7054	0.000444
7055	0.000409
7056	0.000458
7057	0.000474
7058	0.000475
7059	0.000446
7060	0.000409
7061	0.000382
7062	0.000412
7063	0.000413
7064	0.000367
7065	0.000315
7066	0.000269
7067	0.000277
7068	0.00024
7069	0.000229
7070	0.00022
7071	0.00026
7072	0.000293
7073	0.00032
7074	0.000375
7075	0.00037
7076	0.00039
7077	0.000389
7078	0.00036
7079	0.000342
7080	0.000381
7081	0.000423
7082	0.000365
7083	0.000326
7084	0.000358
7085	0.000402
7086	0.000383
7087	0.000386
7088	0.000392
7089	0.000398
7090	0.000364
7091	0.00033
7092	0.000303
7093	0.000299
7094	0.000318
7095	0.000301
7096	0.000307
7097	0.000302
7098	0.000324
7099	0.000386
7100	0.000418
7101	0.000451
7102	0.000475
7103	0.000465
7104	0.000428
7105	0.000381
7106	0.000361
7107	0.000404
7108	0.000425
7109	0.000424
7110	0.000439
7111	0.000415
7112	0.000359
7113	0.000384
7114	0.00045
7115	0.00047
7116	0.000477
7117	0.000463
7118	0.000468
7119	0.000481
7120	0.000455
7121	0.000387
7122	0.000382
7123	0.000419
7124	0.000426
7125	0.000435
7126	0.000463
7127	0.00049
7128	0.000546
7129	0.000569
7130	0.000549
7131	0.000511
7132	0.000486
7133	0.000486
7134	0.000487
7135	0.000482
7136	0.000481
7137	0.000469
7138	0.000446
7139	0.000423
7140	0.000446
7141	0.000504
7142	0.000487
7143	0.000441
7144	0.000388
7145	0.000359
7146	0.000407
7147	0.000453
7148	0.000457
7149	0.000428
7150	0.000437
7151	0.000443
7152	0.000391
7153	0.000383
7154	0.000424
7155	0.000483
7156	0.000512
7157	0.000549
7158	0.000549
7159	0.000519
7160	0.000489
7161	0.000547
7162	0.00055
7163	0.000555
7164	0.000526
7165	0.000573
7166	0.000644
7167	0.000701
7168	0.000649
7169	0.000599
7170	0.000578
7171	0.000592
7172	0.000607
7173	0.00059
7174	0.000523
7175	0.00051
7176	0.000547
7177	0.000599
7178	0.000617
7179	0.00064
7180	0.000635
7181	0.000572
7182	0.000527
7183	0.000533
7184	0.000532
7185	0.000546
7186	0.00054
7187	0.000563
7188	0.000585
7189	0.000591
7190	0.000535
7191	0.000498
7192	0.000507
7193	0.000522
7194	0.000521
7195	0.00047
7196	0.000488
7197	0.000534
7198	0.000576
7199	0.000584
7200	0.00059
7201	0.000631
7202	0.00063
7203	0.000584
7204	0.00055
7205	0.000533
7206	0.000561
7207	0.000567
7208	0.000535
7209	0.000521
7210	0.000483
7211	0.000465
7212	0.000475
7213	0.000494
7214	0.000551
7215	0.000579
7216	0.000623
7217	0.000647
7218	0.000643
7219	0.00064
7220	0.000652
7221	0.000657
7222	0.000671
7223	0.000662
7224	0.000701
7225	0.000752
7226	0.000783
7227	0.000769
7228	0.000736
7229	0.00068
7230	0.00068
7231	0.000693
7232	0.000754
7233	0.000771
7234	0.000732
7235	0.000714
7236	0.000701
7237	0.000721
7238	0.000702
7239	0.000669
7240	0.000605
7241	0.000586
7242	0.000628
7243	0.000665
7244	0.00068
7245	0.000672
7246	0.000667
7247	0.000674
7248	0.000737
7249	0.000751
7250	0.000756
7251	0.000769
7252	0.000771
7253	0.000748
7254	0.000663
7255	0.000608
7256	0.000584
7257	0.000583
7258	0.000605
7259	0.00066
7260	0.000656
7261	0.000632
7262	0.000633
7263	0.000688
7264	0.000748
7265	0.000749
7266	0.00071
7267	0.000659
7268	0.000667
7269	0.000709
7270	0.000708
7271	0.000659
7272	0.000616
7273	0.00064
7274	0.000685
7275	0.000706
7276	0.000704
7277	0.000741
7278	0.000767
7279	0.000745
7280	0.000744
7281	0.000748
7282	0.000752
7283	0.000746
7284	0.000739
7285	0.000739
7286	0.000741
7287	0.000752
7288	0.000789
7289	0.000811
7290	0.000825
7291	0.000831
7292	0.000811
7293	0.000776
7294	0.00076
7295	0.000749
7296	0.000719
7297	0.000718
7298	0.000758
7299	0.00081
7300	0.000817
7301	0.000824
7302	0.000856
7303	0.000885
7304	0.00088
7305	0.000891
7306	0.000894
7307	0.000861
7308	0.000845
7309	0.000844
7310	0.000836
7311	0.000883
7312	0.000925
7313	0.00094
7314	0.000988
7315	0.001037
7316	0.001057
7317	0.001012
7318	0.000972
7319	0.000936
7320	0.000904
7321	0.000846
7322	0.000863
7323	0.000919
7324	0.000899
7325	0.00086
7326	0.000825
7327	0.000817
7328	0.000848
7329	0.000881
7330	0.00089
7331	0.00087
7332	0.000895
7333	0.000893
7334	0.000885
7335	0.000876
7336	0.000929
7337	0.000944
7338	0.000928
7339	0.000892
7340	0.000903
7341	0.000863
7342	0.000825
7343	0.000834
7344	0.00088
7345	0.000896
7346	0.000933
7347	0.00092
7348	0.000862
7349	0.000861
7350	0.000896
7351	0.000887
7352	0.000876
7353	0.000869
7354	0.000918
7355	0.000931
7356	0.000969
7357	0.000973
7358	0.000925
7359	0.000865
7360	0.00086
7361	0.000915
7362	0.000984
7363	0.001034
7364	0.001045
7365	0.001015
7366	0.00096
7367	0.000893
7368	0.000923
7369	0.000994
7370	0.001044
7371	0.001019
7372	0.00096
7373	0.000997
7374	0.001062
7375	0.001096
7376	0.001045
7377	0.000993
7378	0.00101
7379	0.001049
7380	0.001056
7381	0.00102
7382	0.001004
7383	0.001
7384	0.00097
7385	0.000955
7386	0.000998
7387	0.000965
7388	0.000921
7389	0.000941
7390	0.000989
7391	0.00101
7392	0.000984
7393	0.00096
7394	0.000946
7395	0.000942
7396	0.000998
7397	0.001067
7398	0.001053
7399	0.000993
7400	0.000979
7401	0.001007
7402	0.001005
7403	0.000983
7404	0.000977
7405	0.001034
7406	0.001071
7407	0.001105
7408	0.001088
7409	0.000984
7410	0.000924
7411	0.000886
7412	0.000884
7413	0.000956
7414	0.001024
7415	0.000992
7416	0.000927
7417	0.000897
7418	0.000868
7419	0.000853
7420	0.000824
7421	0.000769
7422	0.00075
7423	0.000733
7424	0.000731
7425	0.000735
7426	0.000815
7427	0.000862
7428	0.000845
7429	0.000787
7430	0.000788
7431	0.000781
7432	0.000799
7433	0.000764
7434	0.000741
7435	0.000717
7436	0.000691
7437	0.000675
7438	0.000667
7439	0.000699
7440	0.000707
7441	0.000708
7442	0.000718
7443	0.00074
7444	0.000764
7445	0.000772
7446	0.000762
7447	0.00075
7448	0.000736
7449	0.000743
7450	0.000774
7451	0.00081
7452	0.000812
7453	0.000808
7454	0.000796
7455	0.000782
7456	0.0008
7457	0.000851
7458	0.000946
7459	0.001018
7460	0.001004
7461	0.000964
7462	0.000937
7463	0.00092
7464	0.000912
7465	0.000916
7466	0.000905
7467	0.000854
7468	0.000822
7469	0.000808
7470	0.000803
7471	0.000811
7472	0.000831
7473	0.000808
7474	0.000813
7475	0.000858
7476	0.000922
7477	0.000947
7478	0.00091
7479	0.000863
7480	0.000869
7481	0.000909
7482	0.000935
7483	0.000921
7484	0.000858
7485	0.000849
7486	0.000901
7487	0.000943
7488	0.000901
7489	0.000852
7490	0.0008
7491	0.00079
7492	0.000808
7493	0.000837
7494	0.000834
7495	0.000772
7496	0.000815
7497	0.000884
7498	0.000915
7499	0.00094
7500	0.000938
7501	0.000892
7502	0.000906
7503	0.000918
7504	0.000859
7505	0.000785
7506	0.000798
7507	0.000776
7508	0.00077
7509	0.000773
7510	0.00076
7511	0.000725
7512	0.000729
7513	0.00077
7514	0.00079
7515	0.000783
7516	0.000748
7517	0.000736
7518	0.000791
7519	0.000843
7520	0.000832
7521	0.000823
7522	0.000835
7523	0.000858
7524	0.000837
7525	0.000825
7526	0.000839
7527	0.000841
7528	0.000816
7529	0.000839
7530	0.000861
7531	0.000892
7532	0.000868
7533	0.000842
7534	0.000875
7535	0.000935
7536	0.000968
7537	0.000942
7538	0.000907
7539	0.000878
7540	0.000921
7541	0.000991
7542	0.000975
7543	0.000977
7544	0.001041
7545	0.001096
7546	0.001054
7547	0.001036
7548	0.001031
7549	0.001013
7550	0.000994
7551	0.000959
7552	0.000902
7553	0.000854
7554	0.00081
7555	0.00084
7556	0.000929
7557	0.000943
7558	0.000891
7559	0.000858
7560	0.000855
7561	0.000889
7562	0.000927
7563	0.000958
7564	0.001003
7565	0.001014
7566	0.001039
7567	0.000985
7568	0.000978
7569	0.000969
7570	0.00098
7571	0.000987
7572	0.000993
7573	0.001009
7574	0.001057
7575	0.001094
7576	0.001115
7577	0.001148
7578	0.001193
7579	0.001185
7580	0.001143
7581	0.001116
7582	0.001116
7583	0.001146
7584	0.001126
7585	0.001107
7586	0.001058
7587	0.000981
7588	0.000987
7589	0.001004
7590	0.000992
7591	0.001015
7592	0.001037
7593	0.001078
7594	0.001097
7595	0.001093
7596	0.001072
7597	0.001048
7598	0.000979
7599	0.000893
7600	0.000903
7601	0.000957
7602	0.000973
7603	0.000933
7604	0.000881
7605	0.000869
7606	0.000874
7607	0.000889
7608	0.000924
7609	0.000903
7610	0.000881
7611	0.000894
7612	0.00088
7613	0.000882
7614	0.000883
7615	0.000854
7616	0.000832
7617	0.000827
7618	0.000846
7619	0.000848
7620	0.000843
7621	0.000854
7622	0.000906
7623	0.000855
7624	0.000836
7625	0.000837
7626	0.000882
7627	0.000868
7628	0.000805
7629	0.000786
7630	0.000783
7631	0.000781
7632	0.000763
7633	0.000748
7634	0.000683
7635	0.000634
7636	0.000693
7637	0.000786
7638	0.000795
7639	0.000788
7640	0.000767
7641	0.0008
7642	0.000831
7643	0.000848
7644	0.000843
7645	0.000819
7646	0.000786
7647	0.000785
7648	0.000791
7649	0.000773
7650	0.000784
7651	0.000854
7652	0.000871
7653	0.000828
7654	0.000773
7655	0.000788
7656	0.00076
7657	0.000709
7658	0.000678
7659	0.000675
7660	0.000662
7661	0.000702
7662	0.000739
7663	0.000731
7664	0.000729
7665	0.000762
7666	0.000741
7667	0.000731
7668	0.000749
7669	0.000784
7670	0.000771
7671	0.000755
7672	0.000764
7673	0.000812
7674	0.000856
7675	0.000889
7676	0.000892
7677	0.000892
7678	0.000866
7679	0.000817
7680	0.000809
7681	0.000868
7682	0.000961
7683	0.001013
7684	0.00105
7685	0.00108
7686	0.001057
7687	0.001
7688	0.000983
7689	0.001001
7690	0.001028
7691	0.001042
7692	0.001047
7693	0.001011
7694	0.001001
7695	0.001031
7696	0.001064
7697	0.001083
7698	0.00107
7699	0.001062
7700	0.001066
7701	0.001051
7702	0.000992
7703	0.000934
7704	0.000993
7705	0.001054
7706	0.00109
7707	0.001114
7708	0.001126
7709	0.001123
7710	0.001079
7711	0.001023
7712	0.001021
7713	0.001013
7714	0.001026
7715	0.000978
7716	0.000945
7717	0.000926
7718	0.000876
7719	0.000867
7720	0.000905
7721	0.000929
7722	0.000932
7723	0.000949
7724	0.000967
7725	0.000935
7726	0.000924
7727	0.000929
7728	0.000934
7729	0.000918
7730	0.000882
7731	0.000852
7732	0.000847
7733	0.000843
7734	0.000849
7735	0.000848
7736	0.000863
7737	0.000907
7738	0.000914
7739	0.000895
7740	0.000891
7741	0.000902
7742	0.000928
7743	0.000968
7744	0.000962
7745	0.000976
7746	0.000943
7747	0.000891
7748	0.000903
7749	0.000918
7750	0.000914
7751	0.000883
7752	0.000835
7753	0.000866
7754	0.000933
7755	0.000965
7756	0.000939
7757	0.000949
7758	0.000988
7759	0.001027
7760	0.001045
7761	0.001041
7762	0.001007
7763	0.001004
7764	0.001046
7765	0.001024
7766	0.00096
7767	0.000935
7768	0.00094
7769	0.000948
7770	0.00098
7771	0.000964
7772	0.000931
7773	0.000917
7774	0.000941
7775	0.000924
7776	0.0009
7777	0.000891
7778	0.000915
7779	0.000929
7780	0.000915
7781	0.000881
7782	0.000889
7783	0.000872
7784	0.000879
7785	0.000905
7786	0.000897
7787	0.000866
7788	0.000865
7789	0.000919
7790	0.000979
7791	0.001007
7792	0.000987
7793	0.000972
7794	0.000969
7795	0.001001
7796	0.001013
7797	0.001013
7798	0.000985
7799	0.00093
7800	0.00091
7801	0.000929
7802	0.001001
7803	0.001005
7804	0.00097
7805	0.000932
7806	0.000941
7807	0.000954
7808	0.00096
7809	0.000961
7810	0.000949
7811	0.000959
7812	0.000943
7813	0.000925
7814	0.00092
7815	0.000941
7816	0.000948
7817	0.000983
7818	0.000962
7819	0.000958
7820	0.00096
7821	0.000977
7822	0.001025
7823	0.001036
7824	0.000999
7825	0.001004
7826	0.001031
7827	0.001032
7828	0.001026
7829	0.00098
7830	0.000977
7831	0.00098
7832	0.001026
7833	0.001083
7834	0.001088
7835	0.001085
7836	0.001045
7837	0.000993
7838	0.000976
7839	0.001041
7840	0.001083
7841	0.001135
7842	0.001165
7843	0.001145
7844	0.001091
7845	0.001086
7846	0.001084
7847	0.001086
7848	0.001086
7849	0.0011
7850	0.001134
7851	0.001123
7852	0.001076
7853	0.001032
7854	0.001037
7855	0.001116
7856	0.001101
7857	0.001021
7858	0.00101
7859	0.001051
7860	0.001083
7861	0.001114
7862	0.001167
7863	0.001183
7864	0.001082
7865	0.000982
7866	0.000962
7867	0.000975
7868	0.00102
7869	0.001031
7870	0.001045
7871	0.001049
7872	0.00108
7873	0.001056
7874	0.001016
7875	0.001022
7876	0.001034
7877	0.001016
7878	0.001021
7879	0.001071
7880	0.001075
7881	0.001089
7882	0.00109
7883	0.001077
7884	0.001034
7885	0.00102
7886	0.001062
7887	0.001096
7888	0.001091
7889	0.001068
7890	0.001038
7891	0.001051
7892	0.00106
7893	0.0011
7894	0.001108
7895	0.001111
7896	0.001087
7897	0.001008
7898	0.001015
7899	0.001039
7900	0.001075
7901	0.001119
7902	0.001173
7903	0.00119
7904	0.001174
7905	0.001125
7906	0.001086
7907	0.001098
7908	0.001149
7909	0.001171
7910	0.001153
7911	0.001155
7912	0.001161
7913	0.001167
7914	0.001162
7915	0.001137
7916	0.001169
7917	0.001257
7918	0.001331
7919	0.001324
7920	0.001275
7921	0.001216
7922	0.001147
7923	0.001162
7924	0.001242
7925	0.001329
7926	0.001346
7927	0.001305
7928	0.001278
7929	0.001291
7930	0.001307
7931	0.001289
7932	0.001272
7933	0.001285
7934	0.001253
7935	0.001234
7936	0.001217
7937	0.001152
7938	0.001148
7939	0.001254
7940	0.001366
7941	0.001393
7942	0.001318
7943	0.001288
7944	0.001306
7945	0.001301
7946	0.001289
7947	0.001289
7948	0.001288
7949	0.001279
7950	0.001308
7951	0.001354
7952	0.001312
7953	0.001262
7954	0.001265
7955	0.001348
7956	0.001418
7957	0.001465
7958	0.001476
7959	0.001491
7960	0.001458
7961	0.001427
7962	0.001393
7963	0.001351
7964	0.001278
7965	0.001266
7966	0.001346
7967	0.001445
7968	0.001417
7969	0.001368
7970	0.001355
7971	0.001334
7972	0.001354
7973	0.001406
7974	0.001456
7975	0.00149
7976	0.001484
7977	0.001468
7978	0.001484
7979	0.001487
7980	0.001438
7981	0.001397
7982	0.001388
7983	0.001371
7984	0.001345
7985	0.001292
7986	0.001277
7987	0.001287
7988	0.001334
7989	0.001356
7990	0.001318
7991	0.001292
7992	0.001317
7993	0.001329
7994	0.001251
7995	0.001219
7996	0.001229
7997	0.0012
7998	0.001191
[truncated: 3,401 more rows]

## Sheet: V334dC
Time	UV
6000	0.000457
6001	0.000435
6002	0.000386
6003	0.000364
6004	0.000411
6005	0.000442
6006	0.000429
6007	0.000406
6008	0.000395
6009	0.000413
6010	0.000448
6011	0.000468
6012	0.000482
6013	0.000509
6014	0.000539
6015	0.000545
6016	0.000554
6017	0.000572
6018	0.000579
6019	0.000578
6020	0.000575
6021	0.000572
6022	0.000547
6023	0.000524
6024	0.00052
6025	0.00054
6026	0.000546
6027	0.000533
6028	0.000522
6029	0.000521
6030	0.000559
6031	0.000551
6032	0.000572
6033	0.000553
6034	0.000529
6035	0.000507
6036	0.000489
6037	0.000454
6038	0.00042
6039	0.0004
6040	0.000373
6041	0.000363
6042	0.000395
6043	0.000417
6044	0.00039
6045	0.000384
6046	0.000432
6047	0.000427
6048	0.000424
6049	0.000453
6050	0.000463
6051	0.000457
6052	0.000409
6053	0.000388
6054	0.000395
6055	0.000433
6056	0.000477
6057	0.000484
6058	0.000512
6059	0.000538
6060	0.000534
6061	0.000534
6062	0.000546
6063	0.000599
6064	0.000559
6065	0.000485
6066	0.000474
6067	0.000463
6068	0.000459
6069	0.000483
6070	0.000511
6071	0.000539
6072	0.000534
6073	0.000519
6074	0.000513
6075	0.00048
6076	0.000471
6077	0.000499
6078	0.00051
6079	0.00049
6080	0.000491
6081	0.00048
6082	0.00048
6083	0.000518
6084	0.000561
6085	0.000551
6086	0.000526
6087	0.000528
6088	0.000524
6089	0.000495
6090	0.000455
6091	0.000477
6092	0.000498
6093	0.000523
6094	0.000547
6095	0.000567
6096	0.000568
6097	0.00054
6098	0.000498
6099	0.000492
6100	0.000524
6101	0.000534
6102	0.000537
6103	0.000541
6104	0.000528
6105	0.000483
6106	0.000438
6107	0.00045
6108	0.000499
6109	0.000513
6110	0.000511
6111	0.000537
6112	0.000555
6113	0.000509
6114	0.000453
6115	0.000463
6116	0.00047
6117	0.000448
6118	0.000418
6119	0.000397
6120	0.00038
6121	0.000379
6122	0.00038
6123	0.000377
6124	0.000379
6125	0.000391
6126	0.000387
6127	0.00038
6128	0.000371
6129	0.000388
6130	0.000415
6131	0.000453
6132	0.00043
6133	0.000373
6134	0.00036
6135	0.00037
6136	0.000373
6137	0.000397
6138	0.000406
6139	0.000451
6140	0.000446
6141	0.000452
6142	0.000474
6143	0.000497
6144	0.000488
6145	0.000495
6146	0.000521
6147	0.000524
6148	0.000514
6149	0.00053
6150	0.000559
6151	0.000579
6152	0.000577
6153	0.000541
6154	0.00053
6155	0.000527
6156	0.000497
6157	0.000491
6158	0.00051
6159	0.000545
6160	0.000525
6161	0.000496
6162	0.00047
6163	0.000481
6164	0.00051
6165	0.000537
6166	0.00058
6167	0.000582
6168	0.00055
6169	0.000576
6170	0.000584
6171	0.000567
6172	0.000543
6173	0.000507
6174	0.000493
6175	0.000505
6176	0.00053
6177	0.000545
6178	0.000514
6179	0.000494
6180	0.00049
6181	0.000474
6182	0.00048
6183	0.00048
6184	0.000476
6185	0.000484
6186	0.000509
6187	0.000478
6188	0.000477
6189	0.000461
6190	0.000433
6191	0.00039
6192	0.000419
6193	0.000464
6194	0.00047
6195	0.000452
6196	0.000436
6197	0.000419
6198	0.000413
6199	0.000391
6200	0.000355
6201	0.000375
6202	0.000396
6203	0.000366
6204	0.000372
6205	0.000387
6206	0.000369
6207	0.000405
6208	0.000456
6209	0.000477
6210	0.000467
6211	0.000451
6212	0.000439
6213	0.000468
6214	0.000503
6215	0.000508
6216	0.000517
6217	0.000514
6218	0.000516
6219	0.000498
6220	0.000459
6221	0.000439
6222	0.000409
6223	0.000371
6224	0.000384
6225	0.000419
6226	0.000418
6227	0.000426
6228	0.00045
6229	0.000442
6230	0.000438
6231	0.000431
6232	0.000417
6233	0.00038
6234	0.000341
6235	0.000331
6236	0.000346
6237	0.000336
6238	0.000326
6239	0
6240	-1.7e-05
6241	-7.2e-05
6242	-0.000129
6243	-0.000151
6244	-0.00015
6245	-0.000123
6246	-0.000113
6247	-0.000108
6248	-4.8e-05
6249	4e-06
6250	2.9e-05
6251	3.8e-05
6252	-3.4e-05
6253	-9.8e-05
6254	-0.000102
6255	-8.7e-05
6256	-8.9e-05
6257	-6.1e-05
6258	-3.1e-05
6259	-1.7e-05
6260	-3e-06
6261	-1.5e-05
6262	-5.8e-05
6263	-8.5e-05
6264	-8.8e-05
6265	-9.3e-05
6266	-0.0001
6267	-6.2e-05
6268	-3.3e-05
6269	-3e-05
6270	-3.2e-05
6271	-3.4e-05
6272	-2.8e-05
6273	-3.5e-05
6274	-4.4e-05
6275	-2e-05
6276	-7e-06
6277	-2.6e-05
6278	-3.4e-05
6279	-1.4e-05
6280	1.2e-05
6281	8e-06
6282	2.1e-05
6283	5.4e-05
6284	4e-05
6285	3.3e-05
6286	-1.4e-05
6287	-2.6e-05
6288	-3.2e-05
6289	-4.6e-05
6290	-6.1e-05
6291	-0.000102
6292	-0.000118
6293	-0.000108
6294	-0.000101
6295	-8.7e-05
6296	-0.000112
6297	-0.000122
6298	-0.000114
6299	-0.000103
6300	-8.6e-05
6301	-2.6e-05
6302	1e-05
6303	-1.3e-05
6304	-1.5e-05
6305	2.2e-05
6306	6e-06
6307	-1.6e-05
6308	-5.1e-05
6309	-7.1e-05
6310	-0.000106
6311	-8.6e-05
6312	-5.7e-05
6313	-4.9e-05
6314	-5.5e-05
6315	-3.9e-05
6316	-3.2e-05
6317	-2.6e-05
6318	3e-06
6319	2.4e-05
6320	-2e-06
6321	3e-06
6322	4.5e-05
6323	7.6e-05
6324	0.000111
6325	0.000129
6326	0.000101
6327	6.6e-05
6328	6.1e-05
6329	7.7e-05
6330	6.3e-05
6331	5e-05
6332	6.5e-05
6333	6.8e-05
6334	7.5e-05
6335	0.000102
6336	0.000103
6337	6.1e-05
6338	4.6e-05
6339	2.7e-05
6340	4e-05
6341	1.3e-05
6342	3.4e-05
6343	3.7e-05
6344	2.3e-05
6345	7e-06
6346	2.9e-05
6347	6.1e-05
6348	4.8e-05
6349	4.9e-05
6350	3.6e-05
6351	4e-05
6352	4.4e-05
6353	4.1e-05
6354	2.6e-05
6355	-3e-05
6356	-6.6e-05
6357	-6.7e-05
6358	-5.5e-05
6359	-8e-05
6360	-0.000114
6361	-0.00014
6362	-0.000134
6363	-0.0001
6364	-7.3e-05
6365	-4.4e-05
6366	-7e-06
6367	3.2e-05
6368	1.4e-05
6369	1e-06
6370	-2e-05
6371	3e-06
6372	1e-05
6373	-3.6e-05
6374	-9.6e-05
6375	-0.000103
6376	-6.2e-05
6377	-4.6e-05
6378	-7.4e-05
6379	-9.1e-05
6380	-0.000102
6381	-0.000102
6382	-9.2e-05
6383	-8.9e-05
6384	-6.5e-05
6385	-7.1e-05
6386	-4.3e-05
6387	-6e-06
6388	2.2e-05
6389	2.4e-05
6390	-4e-06
6391	-1.2e-05
6392	-3e-06
6393	-2.3e-05
6394	-5.7e-05
6395	-7.9e-05
6396	-0.000113
6397	-0.000135
6398	-0.000171
6399	-0.000198
6400	-0.000176
6401	-0.000123
6402	-0.000123
6403	-0.000167
6404	-0.000165
6405	-0.000145
6406	-0.000144
6407	-0.000143
6408	-0.000118
6409	-8e-05
6410	-7.2e-05
6411	-6.8e-05
6412	-8.9e-05
6413	-0.00012
6414	-0.000126
6415	-0.000131
6416	-0.000153
6417	-0.000159
6418	-0.000139
6419	-0.00012
6420	-9.9e-05
6421	-7.7e-05
6422	-4.4e-05
6423	-3.2e-05
6424	1e-05
6425	7.2e-05
6426	6.9e-05
6427	3.1e-05
6428	5e-05
6429	7.1e-05
6430	7.9e-05
6431	6.9e-05
6432	5.4e-05
6433	4.7e-05
6434	4.6e-05
6435	3e-06
6436	4e-06
6437	4e-06
6438	-4e-06
6439	2.7e-05
6440	8.3e-05
6441	9.5e-05
6442	8.2e-05
6443	5.7e-05
6444	3.7e-05
6445	1.5e-05
6446	3.5e-05
6447	9.5e-05
6448	0.000132
6449	0.000114
6450	0.000105
6451	0.000101
6452	8.4e-05
6453	9.3e-05
6454	0.000108
6455	0.000108
6456	0.000106
6457	0.000109
6458	0.000127
6459	0.000137
6460	0.000142
6461	0.000122
6462	0.000151
6463	0.000178
6464	0.000212
6465	0.000209
6466	0.000206
6467	0.000199
6468	0.0002
6469	0.00018
6470	0.000171
6471	0.000145
6472	0.000136
6473	0.000132
6474	0.00016
6475	0.000164
6476	0.000181
6477	0.000182
6478	0.000204
6479	0.000199
6480	0.000217
6481	0.000209
6482	0.0002
6483	0.000208
6484	0.000244
6485	0.000258
6486	0.00026
6487	0.000268
6488	0.000275
6489	0.000271
6490	0.000281
6491	0.000254
6492	0.000171
6493	0.000128
6494	0.000147
6495	0.000182
6496	0.000156
6497	9.6e-05
6498	8.2e-05
6499	0.000141
6500	0.000169
6501	0.000123
6502	5.1e-05
6503	1.6e-05
6504	2.2e-05
6505	4.6e-05
6506	2.2e-05
6507	2.9e-05
6508	5.5e-05
6509	8.3e-05
6510	9.3e-05
6511	8.1e-05
6512	7.9e-05
6513	2.8e-05
6514	-1.6e-05
6515	-3.3e-05
6516	-2.6e-05
6517	-3.7e-05
6518	-5e-05
6519	-7.3e-05
6520	-8.7e-05
6521	-9.4e-05
6522	-8e-05
6523	-8.4e-05
6524	-0.000115
6525	-0.000117
6526	-0.000107
6527	-0.000111
6528	-0.000128
6529	-0.000123
6530	-0.000125
6531	-0.000109
6532	-0.000128
6533	-0.000177
6534	-0.000232
6535	-0.000259
6536	-0.000272
6537	-0.000268
6538	-0.000242
6539	-0.000223
6540	-0.000255
6541	-0.000272
6542	-0.000263
6543	-0.000225
6544	-0.000223
6545	-0.00022
6546	-0.000198
6547	-0.000205
6548	-0.000241
6549	-0.000235
6550	-0.00019
6551	-0.000174
6552	-0.000207
6553	-0.000249
6554	-0.000288
6555	-0.00031
6556	-0.00032
6557	-0.000343
6558	-0.000369
6559	-0.000335
6560	-0.000277
6561	-0.00026
6562	-0.000301
6563	-0.000343
6564	-0.000349
6565	-0.000362
6566	-0.000364
6567	-0.000352
6568	-0.000323
6569	-0.000294
6570	-0.000262
6571	-0.00021
6572	-0.000191
6573	-0.000178
6574	-0.000173
6575	-0.000146
6576	-0.000152
6577	-0.000168
6578	-0.000169
6579	-0.00019
6580	-0.000199
6581	-0.000208
6582	-0.000247
6583	-0.000232
6584	-0.000225
6585	-0.000219
6586	-0.000203
6587	-0.000201
6588	-0.000222
6589	-0.000199
6590	-0.000181
6591	-0.000184
6592	-0.000222
6593	-0.000224
6594	-0.000201
6595	-0.000183
6596	-0.000169
6597	-0.000181
6598	-0.000217
6599	-0.000236
6600	-0.000205
6601	-0.000188
6602	-0.000206
6603	-0.000199
6604	-0.000158
6605	-0.000144
6606	-0.000149
6607	-0.000145
6608	-0.000137
6609	-0.000161
6610	-0.000186
6611	-0.000212
6612	-0.000248
6613	-0.000218
6614	-0.000167
6615	-0.000208
6616	-0.000293
6617	-0.00031
6618	-0.000293
6619	-0.000275
6620	-0.000269
6621	-0.000251
6622	-0.000274
6623	-0.000264
6624	-0.000246
6625	-0.000257
6626	-0.000247
6627	-0.000245
6628	-0.000213
6629	-0.000225
6630	-0.000274
6631	-0.00029
6632	-0.000296
6633	-0.000291
6634	-0.000279
6635	-0.000282
6636	-0.000282
6637	-0.000259
6638	-0.000228
6639	-0.000229
6640	-0.000253
6641	-0.000289
6642	-0.000326
6643	-0.000365
6644	-0.00032
6645	-0.000259
6646	-0.000236
6647	-0.000265
6648	-0.000269
6649	-0.000259
6650	-0.000236
6651	-0.00019
6652	-0.000173
6653	-0.000172
6654	-0.000176
6655	-0.000176
6656	-0.000136
6657	-0.000128
6658	-0.000145
6659	-0.000147
6660	-0.000177
6661	-0.000195
6662	-0.000167
6663	-0.000148
6664	-0.000214
6665	-0.000253
6666	-0.000231
6667	-0.000211
6668	-0.000214
6669	-0.00022
6670	-0.000248
6671	-0.000297
6672	-0.00028
6673	-0.000248
6674	-0.000287
6675	-0.000337
6676	-0.00036
6677	-0.000345
6678	-0.00033
6679	-0.000348
6680	-0.000359
6681	-0.000355
6682	-0.000349
6683	-0.000334
6684	-0.000327
6685	-0.00031
6686	-0.000322
6687	-0.000296
6688	-0.000274
6689	-0.000265
6690	-0.000257
6691	-0.000259
6692	-0.000251
6693	-0.000272
6694	-0.000259
6695	-0.000224
6696	-0.000221
6697	-0.000224
6698	-0.000248
6699	-0.000249
6700	-0.000271
6701	-0.000281
6702	-0.000272
6703	-0.000267
6704	-0.000283
6705	-0.000316
6706	-0.000312
6707	-0.000309
6708	-0.000265
6709	-0.000288
6710	-0.000299
6711	-0.000297
6712	-0.000327
6713	-0.000359
6714	-0.000334
6715	-0.000319
6716	-0.000294
6717	-0.000264
6718	-0.000252
6719	-0.000208
6720	-0.000186
6721	-0.000166
6722	-0.000152
6723	-0.000191
6724	-0.00022
6725	-0.000205
6726	-0.000191
6727	-0.000168
6728	-0.000165
6729	-0.000162
6730	-0.000124
6731	-9.5e-05
6732	-8.2e-05
6733	-6.6e-05
6734	-6.1e-05
6735	-4.8e-05
6736	-5.7e-05
6737	-4e-05
6738	-6.2e-05
6739	-7.2e-05
6740	-0.000108
6741	-0.000121
6742	-0.000121
6743	-0.000153
6744	-0.000178
6745	-0.000132
6746	-7.9e-05
6747	-5.9e-05
6748	-5.9e-05
6749	-0.000107
6750	-0.000128
6751	-0.000119
6752	-8.7e-05
6753	-0.000102
6754	-0.000119
6755	-0.000126
6756	-7.6e-05
6757	-3.7e-05
6758	-3.7e-05
6759	-7.6e-05
6760	-0.000126
6761	-0.000138
6762	-0.000123
6763	-0.000114
6764	-9.5e-05
6765	-0.000111
6766	-0.000131
6767	-0.000106
6768	-0.000102
6769	-0.000163
6770	-0.000206
6771	-0.000179
6772	-0.000133
6773	-0.000131
6774	-0.000126
6775	-0.000146
6776	-0.000154
6777	-0.000155
6778	-0.000135
6779	-0.000136
6780	-0.000118
6781	-0.000103
6782	-8.9e-05
6783	-6.3e-05
6784	-1.5e-05
6785	-4.4e-05
6786	-0.000101
6787	-8.4e-05
6788	-4.4e-05
6789	-5.3e-05
6790	-0.000113
6791	-0.000113
6792	-0.00012
6793	-0.000134
6794	-0.000114
6795	-9.6e-05
6796	-8.7e-05
6797	-5.3e-05
6798	-7.2e-05
6799	-0.000105
6800	-0.000134
6801	-0.000142
6802	-0.00014
6803	-0.000154
6804	-0.000115
6805	-7e-05
6806	-5.5e-05
6807	-5.7e-05
6808	-2.9e-05
6809	1e-06
6810	2.6e-05
6811	1.9e-05
6812	1.1e-05
6813	2e-05
6814	2.3e-05
6815	2.5e-05
6816	2.9e-05
6817	2.8e-05
6818	2.6e-05
6819	-6e-06
6820	-2.2e-05
6821	-3.5e-05
6822	-2.8e-05
6823	1.8e-05
6824	4.4e-05
6825	2.9e-05
6826	-2e-06
6827	-1.1e-05
6828	-2.2e-05
6829	-1.8e-05
6830	-3.1e-05
6831	-2.1e-05
6832	-4.8e-05
6833	-4.7e-05
6834	-6.4e-05
6835	-7.5e-05
6836	-6.7e-05
6837	-1.1e-05
6838	-2.3e-05
6839	-4e-05
6840	-5.3e-05
6841	-2.2e-05
6842	1.2e-05
6843	2.5e-05
6844	3.3e-05
6845	3.3e-05
6846	4.4e-05
6847	4.7e-05
6848	5.5e-05
6849	3.7e-05
6850	-1.8e-05
6851	-2.6e-05
6852	-1.1e-05
6853	-5e-06
6854	-3.6e-05
6855	-5.4e-05
6856	-5.9e-05
6857	-6e-05
6858	-6.4e-05
6859	-7.6e-05
6860	-0.000129
6861	-0.000163
6862	-0.000111
6863	-6e-05
6864	-3.2e-05
6865	-2.1e-05
6866	-1.1e-05
6867	-7e-06
6868	-3e-06
6869	-6e-06
6870	-2.3e-05
6871	-4.4e-05
6872	-4e-05
6873	-1.7e-05
6874	0
6875	1.3e-05
6876	1.6e-05
6877	-5e-06
6878	-5.1e-05
6879	-7.5e-05
6880	-7.9e-05
6881	-5.9e-05
6882	-4.8e-05
6883	-4.1e-05
6884	-4.6e-05
6885	-4.5e-05
6886	-5e-06
6887	1.1e-05
6888	5.1e-05
6889	5.9e-05
6890	5.3e-05
6891	6.5e-05
6892	7.7e-05
6893	0.000107
6894	0.000121
6895	0.000117
6896	0.000121
6897	0.000146
6898	0.000101
6899	9.2e-05
6900	0.000104
6901	0.000139
6902	0.000129
6903	6.1e-05
6904	-1e-06
6905	-9e-06
6906	2.5e-05
6907	1.7e-05
6908	-4e-06
6909	4e-06
6910	3.9e-05
6911	6.7e-05
6912	6.7e-05
6913	5.8e-05
6914	6.6e-05
6915	6.8e-05
6916	7e-05
6917	4.3e-05
6918	1.5e-05
6919	9e-06
6920	4.3e-05
6921	5.4e-05
6922	3.9e-05
6923	1.6e-05
6924	1.5e-05
6925	1.8e-05
6926	2.7e-05
6927	4.8e-05
6928	6e-05
6929	8.1e-05
6930	0.000104
6931	0.0001
6932	6.7e-05
6933	3.5e-05
6934	3.1e-05
6935	2.8e-05
6936	4.8e-05
6937	2.6e-05
6938	-2e-05
6939	-2.3e-05
6940	-2.1e-05
6941	-5.5e-05
6942	-8.5e-05
6943	-4.7e-05
6944	-1.1e-05
6945	-1e-05
6946	-1.1e-05
6947	-1.7e-05
6948	-3e-05
6949	-2.1e-05
6950	-1.8e-05
6951	-1.7e-05
6952	7e-06
6953	2e-05
6954	4.9e-05
6955	4.7e-05
6956	3.5e-05
6957	1.4e-05
6958	-1e-06
6959	-2.8e-05
6960	-6.2e-05
6961	-0.000111
6962	-0.000103
6963	-0.000104
6964	-8.5e-05
6965	-5.8e-05
6966	-3.1e-05
6967	-3.8e-05
6968	-7e-05
6969	-8.3e-05
6970	-7.5e-05
6971	-3e-05
6972	-4e-05
6973	-4e-06
6974	3e-06
6975	3.3e-05
6976	2.4e-05
6977	-1.1e-05
6978	-2.8e-05
6979	-6.5e-05
6980	-6.2e-05
6981	-2.1e-05
6982	6e-06
6983	-1.4e-05
6984	-6.9e-05
6985	-0.000128
6986	-0.000132
6987	-9.9e-05
6988	-7.6e-05
6989	-6e-05
6990	-5.9e-05
6991	-7.4e-05
6992	-0.000105
6993	-0.000158
6994	-0.000183
6995	-0.000205
6996	-0.000209
6997	-0.000204
6998	-0.000188
6999	-0.000179
7000	-0.000182
7001	-0.000158
7002	-0.000158
7003	-0.000171
7004	-0.00017
7005	-0.00014
7006	-0.000127
7007	-0.000122
7008	-0.000153
7009	-0.000214
7010	-0.00022
7011	-0.000155
7012	-0.000118
7013	-0.000152
7014	-0.000214
7015	-0.000225
7016	-0.000216
7017	-0.000202
7018	-0.000173
7019	-0.00016
7020	-0.00014
7021	-9.5e-05
7022	-8.5e-05
7023	-0.000135
7024	-0.000171
7025	-0.000207
7026	-0.000193
7027	-0.000176
7028	-0.000161
7029	-0.000179
7030	-0.000242
7031	-0.000269
7032	-0.000258
7033	-0.00024
7034	-0.000264
7035	-0.000309
7036	-0.000321
7037	-0.00031
7038	-0.000266
7039	-0.000235
7040	-0.000267
7041	-0.000285
7042	-0.00025
7043	-0.000231
7044	-0.000232
7045	-0.00022
7046	-0.000189
7047	-0.000183
7048	-0.000206
7049	-0.000231
7050	-0.000236
7051	-0.000253
7052	-0.00028
7053	-0.000282
7054	-0.000265
7055	-0.000232
7056	-0.000221
7057	-0.000219
7058	-0.000225
7059	-0.000212
7060	-0.000223
7061	-0.000233
7062	-0.000229
7063	-0.000228
7064	-0.000301
7065	-0.000385
7066	-0.0004
7067	-0.000396
7068	-0.000425
7069	-0.00043
7070	-0.000405
7071	-0.000377
7072	-0.00034
7073	-0.000322
7074	-0.000341
7075	-0.00035
7076	-0.000326
7077	-0.000275
7078	-0.000248
7079	-0.000235
7080	-0.000239
7081	-0.000263
7082	-0.000268
7083	-0.00028
7084	-0.000272
7085	-0.000236
7086	-0.000228
7087	-0.000248
7088	-0.000273
7089	-0.000306
7090	-0.000297
7091	-0.000269
7092	-0.00026
7093	-0.000256
7094	-0.000277
7095	-0.000276
7096	-0.000285
7097	-0.000289
7098	-0.000302
7099	-0.000315
7100	-0.000317
7101	-0.000282
7102	-0.0003
7103	-0.000299
7104	-0.000265
7105	-0.000281
7106	-0.000312
7107	-0.000337
7108	-0.000356
7109	-0.000375
7110	-0.000388
7111	-0.000409
7112	-0.000433
7113	-0.000448
7114	-0.00046
7115	-0.000466
7116	-0.000435
7117	-0.00036
7118	-0.000317
7119	-0.000297
7120	-0.000291
7121	-0.00028
7122	-0.000312
7123	-0.000348
7124	-0.000374
7125	-0.000395
7126	-0.000383
7127	-0.000355
7128	-0.000326
7129	-0.000299
7130	-0.00031
7131	-0.000313
7132	-0.00031
7133	-0.00027
7134	-0.000274
7135	-0.000322
7136	-0.000332
7137	-0.000304
7138	-0.000302
7139	-0.000337
7140	-0.000342
7141	-0.000344
7142	-0.000339
7143	-0.000318
7144	-0.000302
7145	-0.000294
7146	-0.000274
7147	-0.000298
7148	-0.000324
7149	-0.000332
7150	-0.000326
7151	-0.000346
7152	-0.000332
7153	-0.000298
7154	-0.000286
7155	-0.000251
7156	-0.000236
7157	-0.00024
7158	-0.000285
7159	-0.000295
7160	-0.000261
7161	-0.000215
7162	-0.000176
7163	-0.000162
7164	-0.000145
7165	-0.00012
7166	-9.1e-05
7167	-3.8e-05
7168	-1e-06
7169	-1.6e-05
7170	-5e-06
7171	4.6e-05
7172	7.3e-05
7173	3.8e-05
7174	-4.5e-05
7175	-0.000119
7176	-0.000133
7177	-0.00016
7178	-0.00016
7179	-0.00016
7180	-0.000194
7181	-0.000199
7182	-0.000174
7183	-0.000127
7184	-0.000125
7185	-0.000142
7186	-0.000114
7187	-0.000108
7188	-0.000126
7189	-0.000126
7190	-0.000109
7191	-6.5e-05
7192	-5.7e-05
7193	-8.6e-05
7194	-7.5e-05
7195	-5.8e-05
7196	-3.6e-05
7197	-2e-05
7198	4.1e-05
7199	5.7e-05
7200	4.3e-05
7201	2.2e-05
7202	1.4e-05
7203	-8e-06
7204	-4.2e-05
7205	-7e-05
7206	-7.8e-05
7207	-0.000108
7208	-0.00015
7209	-0.000164
7210	-0.000206
7211	-0.000246
7212	-0.000229
7213	-0.000193
7214	-0.000165
7215	-0.000173
7216	-0.000209
7217	-0.000239
7218	-0.00023
7219	-0.000183
7220	-0.000172
7221	-0.000224
7222	-0.000259
7223	-0.000294
7224	-0.000286
7225	-0.000271
7226	-0.000265
7227	-0.000254
7228	-0.000215
7229	-0.000185
7230	-0.000164
7231	-0.000155
7232	-0.000167
7233	-0.000168
7234	-0.000149
7235	-0.000141
7236	-0.000161
7237	-0.000228
7238	-0.000254
7239	-0.000217
7240	-0.000226
7241	-0.000267
7242	-0.000277
7243	-0.000297
7244	-0.000292
7245	-0.00026
7246	-0.000244
7247	-0.000269
7248	-0.000283
7249	-0.000313
7250	-0.0003
7251	-0.000259
7252	-0.000191
7253	-0.000173
7254	-0.0002
7255	-0.000232
7256	-0.000249
7257	-0.000255
7258	-0.000238
7259	-0.000198
7260	-0.000183
7261	-0.000206
7262	-0.000244
7263	-0.000269
7264	-0.000292
7265	-0.000278
7266	-0.000271
7267	-0.000267
7268	-0.000287
7269	-0.000315
7270	-0.000298
7271	-0.000285
7272	-0.000275
7273	-0.0003
7274	-0.000311
7275	-0.000315
7276	-0.000327
7277	-0.000343
7278	-0.00031
7279	-0.000275
7280	-0.000256
7281	-0.000242
7282	-0.000225
7283	-0.000191
7284	-0.000138
7285	-0.000138
7286	-0.000156
7287	-0.000195
7288	-0.000253
7289	-0.000294
7290	-0.000299
7291	-0.00031
7292	-0.000305
7293	-0.000264
7294	-0.000225
7295	-0.000207
7296	-0.000202
7297	-0.000207
7298	-0.000228
7299	-0.00022
7300	-0.000232
7301	-0.000255
7302	-0.000252
7303	-0.000228
7304	-0.000232
7305	-0.000228
7306	-0.000248
7307	-0.000272
7308	-0.000277
7309	-0.00026
7310	-0.000244
7311	-0.000228
7312	-0.000201
7313	-0.000167
7314	-0.000145
7315	-0.000134
7316	-0.000132
7317	-0.000135
7318	-0.00015
7319	-0.000131
7320	-0.000103
7321	-0.000108
7322	-0.000131
7323	-0.00014
7324	-0.000136
7325	-0.000149
7326	-0.000176
7327	-0.000213
7328	-0.000212
7329	-0.00016
7330	-0.00012
7331	-9.4e-05
7332	-9.6e-05
7333	-0.000136
7334	-0.000162
7335	-0.000163
7336	-0.000126
7337	-0.000106
7338	-0.000107
7339	-0.000125
7340	-9.1e-05
7341	-4.7e-05
7342	-8e-06
7343	-3e-06
7344	-3e-05
7345	-8.7e-05
7346	-0.00014
7347	-0.000153
7348	-0.000169
7349	-0.000175
7350	-0.000154
7351	-0.000132
7352	-0.000133
7353	-0.00012
7354	-0.000132
7355	-0.000147
7356	-0.000165
7357	-0.00014
7358	-0.000122
7359	-0.000124
7360	-0.000137
7361	-0.000154
7362	-0.000158
7363	-0.000121
7364	-9.3e-05
7365	-7.4e-05
7366	-7.5e-05
7367	-0.000105
7368	-0.000154
7369	-0.00017
7370	-0.000152
7371	-0.000112
7372	-0.000107
7373	-0.000123
7374	-0.000151
7375	-0.00016
7376	-0.000128
7377	-0.00014
7378	-0.000184
7379	-0.000175
7380	-0.000167
7381	-0.0002
7382	-0.000233
7383	-0.000219
7384	-0.000187
7385	-0.000197
7386	-0.000213
7387	-0.00025
7388	-0.00025
7389	-0.00024
7390	-0.000213
7391	-0.00019
7392	-0.000171
7393	-0.000181
7394	-0.000195
7395	-0.000185
7396	-0.000193
7397	-0.000206
7398	-0.000198
7399	-0.00021
7400	-0.000185
7401	-0.000151
7402	-0.000195
7403	-0.000224
7404	-0.000236
7405	-0.000226
7406	-0.000226
7407	-0.000249
7408	-0.000296
7409	-0.000299
7410	-0.000287
7411	-0.000295
7412	-0.000357
7413	-0.000389
7414	-0.000403
7415	-0.00042
7416	-0.000415
7417	-0.000421
7418	-0.00043
7419	-0.000418
7420	-0.000393
7421	-0.000399
7422	-0.000399
7423	-0.000399
7424	-0.000401
7425	-0.00043
7426	-0.000466
7427	-0.000449
7428	-0.000431
7429	-0.000424
7430	-0.000435
7431	-0.000395
7432	-0.000375
7433	-0.000371
7434	-0.000388
7435	-0.000375
7436	-0.000365
7437	-0.000355
7438	-0.000364
7439	-0.000357
7440	-0.000309
7441	-0.000259
7442	-0.000261
7443	-0.000273
7444	-0.000275
7445	-0.000261
7446	-0.000263
7447	-0.000249
7448	-0.000228
7449	-0.000184
7450	-0.000136
7451	-0.000123
7452	-0.000113
7453	-0.000109
7454	-0.000137
7455	-0.000145
7456	-0.000123
7457	-0.000102
7458	-0.000112
7459	-0.000113
7460	-0.000134
7461	-0.000154
7462	-0.000181
7463	-0.000204
7464	-0.000225
7465	-0.000211
7466	-0.000201
7467	-0.000185
7468	-0.000162
7469	-0.000125
7470	-8.9e-05
7471	-7.9e-05
7472	-8.2e-05
7473	-9.9e-05
7474	-0.000127
7475	-0.000123
7476	-0.000134
7477	-0.000162
7478	-0.000195
7479	-0.000205
7480	-0.000169
7481	-0.000154
7482	-0.000176
7483	-0.000217
7484	-0.000217
7485	-0.000196
7486	-0.000201
7487	-0.000224
7488	-0.000239
7489	-0.000207
7490	-0.000183
7491	-0.000195
7492	-0.0002
7493	-0.000223
7494	-0.000241
7495	-0.000241
7496	-0.000189
7497	-0.000156
7498	-0.000139
7499	-0.000145
7500	-0.000151
7501	-0.00012
7502	-0.00011
7503	-0.000127
7504	-0.000143
7505	-0.000131
7506	-0.000118
7507	-0.000162
7508	-0.00018
7509	-0.000145
7510	-0.000123
7511	-0.000102
7512	-7.8e-05
7513	-9.8e-05
7514	-0.000148
7515	-0.000182
7516	-0.000175
7517	-0.000157
7518	-0.000152
7519	-0.000166
7520	-0.000119
7521	-1.9e-05
7522	5.1e-05
7523	8.6e-05
7524	8.6e-05
7525	3.7e-05
7526	-3.4e-05
7527	-5.4e-05
7528	-6.5e-05
7529	-6.7e-05
7530	-3.9e-05
7531	2.6e-05
7532	4.5e-05
7533	1.1e-05
7534	0
7535	-2e-06
7536	-1.3e-05
7537	-2.5e-05
7538	-2.3e-05
7539	-9e-06
7540	-1.7e-05
7541	-2.4e-05
7542	-3.4e-05
7543	-3.9e-05
7544	-4.2e-05
7545	-6e-05
7546	-0.000133
7547	-0.000199
7548	-0.000212
7549	-0.000204
7550	-0.000186
7551	-0.00022
7552	-0.000233
7553	-0.000236
7554	-0.000251
7555	-0.000248
7556	-0.000244
7557	-0.000304
7558	-0.000334
7559	-0.000356
7560	-0.000357
7561	-0.00032
7562	-0.000278
7563	-0.000264
7564	-0.000256
7565	-0.000229
7566	-0.000209
7567	-0.000221
7568	-0.000214
7569	-0.000224
7570	-0.000203
7571	-0.000184
7572	-0.000181
7573	-0.000186
7574	-0.000201
7575	-0.00017
7576	-0.000147
7577	-0.000119
7578	-0.000155
7579	-0.00017
7580	-0.00016
7581	-0.00011
7582	-8.3e-05
7583	-6.9e-05
7584	-7.2e-05
7585	-3.1e-05
7586	5.1e-05
7587	9.9e-05
7588	9.7e-05
7589	8.2e-05
7590	0.000107
7591	0.000102
7592	6.8e-05
7593	2.1e-05
7594	-2.8e-05
7595	-4.5e-05
7596	-3.6e-05
7597	-5.4e-05
7598	-8.6e-05
7599	-9.3e-05
7600	-9.5e-05
7601	-9e-05
7602	-3.5e-05
7603	5.4e-05
7604	4.3e-05
7605	1.2e-05
7606	3.5e-05
7607	5.8e-05
7608	5.4e-05
7609	-6e-06
7610	-2.8e-05
7611	-2.9e-05
7612	1.3e-05
7613	3.2e-05
7614	3.6e-05
7615	5.5e-05
7616	8.9e-05
7617	0.000108
7618	8.1e-05
7619	4e-05
7620	-6e-06
7621	-5.8e-05
7622	-7e-05
7623	-5e-05
7624	-2e-06
7625	3.3e-05
7626	5e-05
7627	5.8e-05
7628	4.6e-05
7629	4.6e-05
7630	7.8e-05
7631	0.000125
7632	0.00014
7633	0.000136
7634	0.000113
7635	0.000112
7636	0.000136
7637	0.000134
7638	0.000124
7639	0.000135
7640	0.000167
7641	0.000142
7642	0.000135
7643	0.000165
7644	0.000165
7645	0.000177
7646	0.000184
7647	0.000181
7648	0.000147
7649	0.000171
7650	0.000164
7651	0.000155
7652	0.000143
7653	0.000134
7654	0.000184
7655	0.000208
7656	0.000184
7657	0.000186
7658	0.000182
7659	0.000169
7660	0.000111
7661	7.1e-05
7662	7.7e-05
7663	7.7e-05
7664	5.2e-05
7665	4.2e-05
7666	4.3e-05
7667	3.8e-05
7668	4.6e-05
7669	6.5e-05
7670	3.4e-05
7671	6.7e-05
7672	8.8e-05
7673	7.9e-05
7674	8.1e-05
7675	8.3e-05
7676	9.1e-05
7677	0.000113
7678	0.00013
7679	0.000127
7680	0.000105
7681	8.2e-05
7682	7.5e-05
7683	9.9e-05
7684	7.4e-05
7685	6.1e-05
7686	7.6e-05
7687	0.000101
7688	0.000135
7689	0.00018
7690	0.000205
7691	0.00017
7692	0.000147
7693	0.00016
7694	0.000211
7695	0.000222
7696	0.000205
7697	0.000166
7698	0.000152
7699	0.000165
7700	0.000183
7701	0.000212
7702	0.000205
7703	0.00019
7704	0.000183
7705	0.000145
7706	0.000127
7707	8.8e-05
7708	7.1e-05
7709	8.4e-05
7710	0.000124
7711	0.000139
7712	0.0001
7713	6.8e-05
7714	5.3e-05
7715	3.4e-05
7716	1.5e-05
7717	3e-05
7718	4.8e-05
7719	6.4e-05
7720	8.1e-05
7721	0.000107
7722	7.5e-05
7723	2.7e-05
7724	-2e-05
7725	-2.9e-05
7726	-2e-05
7727	-2.5e-05
7728	-3.4e-05
7729	-4.2e-05
7730	-4e-05
7731	-1.3e-05
7732	4e-06
7733	5.5e-05
7734	0.000103
7735	0.00012
7736	0.000115
7737	0.000117
7738	0.000119
7739	0.000126
7740	0.000115
7741	0.000102
7742	7.5e-05
7743	4.7e-05
7744	6.3e-05
7745	5.6e-05
7746	6.3e-05
7747	6e-05
7748	7.5e-05
7749	8.4e-05
7750	9.9e-05
7751	0.000109
7752	8.6e-05
7753	8.9e-05
7754	0.000108
7755	0.000129
7756	0.000147
7757	0.000151
7758	0.000171
7759	0.000156
7760	0.000162
7761	0.00019
7762	0.000224
7763	0.00022
7764	0.000198
7765	0.000241
7766	0.000277
7767	0.000305
7768	0.000303
7769	0.000292
7770	0.000263
7771	0.000193
7772	0.000148
7773	0.000151
7774	0.00016
7775	0.000159
7776	0.000155
7777	0.000174
7778	0.000194
7779	0.000186
7780	0.000138
7781	0.000106
7782	9.1e-05
7783	0.000129
7784	0.000169
7785	0.00019
7786	0.000184
7787	0.000192
7788	0.000177
7789	0.000177
7790	0.000213
7791	0.00025
7792	0.000253
7793	0.000242
7794	0.000195
7795	0.000176
7796	0.000172
7797	0.000183
7798	0.000173
7799	0.000138
7800	0.000126
7801	0.000142
7802	0.000115
7803	8.1e-05
7804	5.5e-05
7805	7.5e-05
7806	0.000102
7807	0.000119
7808	0.000118
7809	0.00017
7810	0.00019
7811	0.0002
7812	0.000169
7813	0.000137
7814	0.000109
7815	8.9e-05
7816	7.3e-05
7817	7e-05
7818	7.2e-05
7819	0.000114
7820	0.000142
7821	0.000128
7822	0.000156
7823	0.000157
7824	0.000123
7825	0.000109
7826	0.000133
7827	0.000108
7828	9e-05
7829	0.000111
7830	0.000155
7831	0.000173
7832	0.000179
7833	0.00018
7834	0.000169
7835	0.000177
7836	0.000205
7837	0.000235
7838	0.000227
7839	0.000198
7840	0.000142
7841	0.00013
7842	0.000132
7843	0.000155
7844	0.000168
7845	0.000166
7846	0.000192
7847	0.000245
7848	0.00029
7849	0.000299
7850	0.00029
7851	0.000278
7852	0.000274
7853	0.000265
7854	0.000242
7855	0.000225
7856	0.00023
7857	0.000225
7858	0.000214
7859	0.00022
7860	0.000209
7861	0.000195
7862	0.000214
7863	0.000221
7864	0.000215
7865	0.000225
7866	0.000244
7867	0.000227
7868	0.000208
7869	0.000207
7870	0.000227
7871	0.000246
7872	0.000259
7873	0.000269
7874	0.000272
7875	0.000305
7876	0.000321
7877	0.000319
7878	0.000317
7879	0.000299
7880	0.000256
7881	0.000249
7882	0.000251
7883	0.000266
7884	0.000283
7885	0.000287
7886	0.000297
7887	0.000304
7888	0.000306
7889	0.000269
7890	0.000234
7891	0.000227
7892	0.00026
7893	0.000243
7894	0.000192
7895	0.000173
7896	0.0002
7897	0.000229
7898	0.000258
7899	0.000249
7900	0.000228
7901	0.000241
7902	0.000227
7903	0.000192
7904	0.000156
7905	0.000167
7906	0.000183
7907	0.000194
7908	0.000204
7909	0.000207
7910	0.000211
7911	0.00018
7912	0.000145
7913	0.000131
7914	0.000139
7915	0.000146
7916	0.000172
7917	0.00017
7918	0.000146
7919	8.5e-05
7920	6.1e-05
7921	5.9e-05
7922	5.6e-05
7923	6e-05
7924	7.3e-05
7925	8.3e-05
7926	0.000118
7927	0.000157
7928	0.000159
7929	0.000143
7930	0.000159
7931	0.000183
7932	0.00022
7933	0.000227
7934	0.000194
7935	0.000195
7936	0.000195
7937	0.000126
7938	8.8e-05
7939	8.1e-05
7940	8.8e-05
7941	8.2e-05
7942	7.3e-05
7943	9e-05
7944	9.8e-05
7945	8.3e-05
7946	3.7e-05
7947	2.3e-05
7948	5.3e-05
7949	8.9e-05
7950	7.4e-05
7951	4.3e-05
7952	6.8e-05
7953	7.6e-05
7954	4.5e-05
7955	2e-06
7956	-1.8e-05
7957	1.2e-05
7958	2.3e-05
7959	-1e-06
7960	-4.4e-05
7961	-4.8e-05
7962	-2.4e-05
7963	-3e-06
7964	7e-06
7965	2.3e-05
7966	3.1e-05
7967	-1.4e-05
7968	-4e-06
7969	1.9e-05
7970	5.3e-05
7971	2.3e-05
7972	-2.3e-05
7973	-2.2e-05
7974	1.1e-05
7975	3.6e-05
7976	1.6e-05
7977	-4.2e-05
7978	-7.2e-05
7979	-2.2e-05
7980	-1.1e-05
7981	-1.4e-05
7982	-3.4e-05
7983	-3.4e-05
7984	-2e-05
7985	-1.7e-05
7986	-1.3e-05
7987	-1e-05
7988	-1.7e-05
7989	-3.6e-05
7990	-5.3e-05
7991	-8e-05
7992	-9.5e-05
7993	-6.6e-05
7994	-5e-05
7995	-5e-05
7996	-6.3e-05
7997	-4.8e-05
7998	-2.2e-05
[truncated: 3,401 more rows]

## Sheet: A316dC
Time	UV
6000	2.5
6001	2.5
6002	2.5
6003	2.5
6004	2.5
6005	2.5
6006	2.5
6007	2.5
6008	2.5
6009	2.5
6010	2.5
6011	2.5
6012	2.5
6013	2.5
6014	2.5
6015	2.5
6016	2.5
6017	2.5
6018	2.5
6019	2.5
6020	2.5
6021	2.5
6022	2.5
6023	2.5
6024	2.5
6025	2.5
6026	2.5
6027	2.5
6028	2.5
6029	2.5
6030	2.5
6031	2.5
6032	2.5
6033	2.5
6034	2.5
6035	2.5
6036	2.5
6037	2.5
6038	2.5
6039	2.5
6040	2.5
6041	2.5
6042	2.5
6043	2.5
6044	2.5
6045	2.5
6046	2.5
6047	2.5
6048	2.5
6049	2.5
6050	2.5
6051	2.5
6052	2.5
6053	2.5
6054	2.5
6055	2.5
6056	2.5
6057	2.5
6058	2.5
6059	2.5
6060	2.5
6061	2.5
6062	2.5
6063	2.5
6064	2.5
6065	2.5
6066	2.5
6067	2.5
6068	2.5
6069	2.5
6070	2.5
6071	2.5
6072	2.5
6073	2.5
6074	2.5
6075	2.5
6076	2.5
6077	2.5
6078	2.5
6079	2.5
6080	2.5
6081	2.5
6082	2.5
6083	2.5
6084	2.5
6085	2.5
6086	2.5
6087	2.5
6088	2.5
6089	2.5
6090	2.5
6091	2.5
6092	2.5
6093	2.5
6094	2.5
6095	2.5
6096	2.5
6097	2.5
6098	2.5
6099	2.5
6100	2.5
6101	2.5
6102	2.5
6103	2.5
6104	2.5
6105	2.5
6106	2.5
6107	2.5
6108	2.5
6109	2.5
6110	2.5
6111	2.5
6112	2.5
6113	2.5
6114	2.5
6115	2.5
6116	2.5
6117	2.5
6118	2.5
6119	2.5
6120	2.5
6121	2.5
6122	2.5
6123	2.5
6124	2.5
6125	2.5
6126	2.5
6127	2.5
6128	2.5
6129	2.5
6130	2.5
6131	2.5
6132	2.5
6133	2.5
6134	2.5
6135	2.5
6136	2.5
6137	2.5
6138	2.5
6139	2.5
6140	2.5
6141	2.5
6142	2.5
6143	2.5
6144	2.5
6145	2.5
6146	2.5
6147	2.5
6148	2.5
6149	2.5
6150	2.5
6151	2.5
6152	2.5
6153	2.5
6154	2.5
6155	2.5
6156	2.5
6157	2.5
6158	2.5
6159	2.5
6160	2.5
6161	2.5
6162	2.5
6163	2.5
6164	2.5
6165	2.5
6166	2.5
6167	2.5
6168	2.5
6169	2.5
6170	2.5
6171	2.5
6172	2.5
6173	2.5
6174	2.5
6175	2.5
6176	2.5
6177	2.5
6178	2.5
6179	2.5
6180	2.5
6181	2.5
6182	2.5
6183	2.5
6184	2.5
6185	2.5
6186	2.5
6187	2.5
6188	2.5
6189	2.5
6190	2.5
6191	2.5
6192	2.5
6193	2.5
6194	2.5
6195	2.5
6196	2.5
6197	2.5
6198	2.5
6199	2.5
6200	2.5
6201	2.5
6202	2.5
6203	2.5
6204	2.5
6205	2.5
6206	2.5
6207	2.5
6208	2.5
6209	2.5
6210	2.5
6211	2.5
6212	2.5
6213	2.5
6214	2.5
6215	2.5
6216	2.5
6217	2.5
6218	2.5
6219	2.5
6220	2.5
6221	2.5
6222	2.5
6223	2.5
6224	2.5
6225	2.5
6226	2.5
6227	2.5
6228	2.5
6229	2.5
6230	2.5
6231	2.5
6232	2.5
6233	2.5
6234	2.5
6235	2.5
6236	2.5
6237	2.5
6238	2.5
6239	0
6240	0.000276
6241	0.001034
6242	0.001837
6243	0.001616
6244	0.001846
6245	0.00208
6246	0.002065
6247	0.001998
6248	0.001864
6249	0.001754
6250	0.001631
6251	0.001684
6252	0.00163
6253	0.00189
6254	0.002122
6255	0.002106
6256	0.00236
6257	0.002291
6258	0.002244
6259	0.001741
6260	0.001485
6261	0.001452
6262	0.001709
6263	0.002283
6264	0.002426
6265	0.002097
6266	0.001898
6267	0.001494
6268	0.001802
6269	0.001883
6270	0.001782
6271	0.001931
6272	0.001828
6273	0.001819
6274	0.001586
6275	0.001352
6276	0.001571
6277	0.002094
6278	0.002234
6279	0.001989
6280	0.00196
6281	0.002047
6282	0.002166
6283	0.002018
6284	0.001943
6285	0.001979
6286	0.00191
6287	0.002116
6288	0.002338
6289	0.00238
6290	0.002141
6291	0.001869
6292	0.001535
6293	0.001506
6294	0.001687
6295	0.002144
6296	0.002146
6297	0.001789
6298	0.00199
6299	0.001867
6300	0.002051
6301	0.002389
6302	0.002703
6303	0.002492
6304	0.0029
6305	0.003086
6306	0.003206
6307	0.003175
6308	0.003231
6309	0.003409
6310	0.003276
6311	0.003102
6312	0.003183
6313	0.00344
6314	0.003717
6315	0.003856
6316	0.003683
6317	0.003606
6318	0.00384
6319	0.003654
6320	0.003764
6321	0.00375
6322	0.003588
6323	0.003856
6324	0.004044
6325	0.003818
6326	0.003598
6327	0.003855
6328	0.003865
6329	0.003978
6330	0.003652
6331	0.003466
6332	0.003569
6333	0.003612
6334	0.003459
6335	0.00339
6336	0.003648
6337	0.003521
6338	0.00347
6339	0.003474
6340	0.003489
6341	0.003814
6342	0.003978
6343	0.003912
6344	0.003774
6345	0.003316
6346	0.003425
6347	0.003574
6348	0.003722
6349	0.003613
6350	0.00346
6351	0.003285
6352	0.003196
6353	0.003288
6354	0.003355
6355	0.003185
6356	0.003282
6357	0.003284
6358	0.003183
6359	0.003032
6360	0.003214
6361	0.003499
6362	0.003282
6363	0.0037
6364	0.003613
6365	0.003384
6366	0.003036
6367	0.003286
6368	0.003319
6369	0.003382
6370	0.003547
6371	0.003552
6372	0.003301
6373	0.003232
6374	0.002753
6375	0.002943
6376	0.003093
6377	0.003145
6378	0.003076
6379	0.003047
6380	0.003172
6381	0.003172
6382	0.002909
6383	0.002854
6384	0.002877
6385	0.002895
6386	0.002937
6387	0.002971
6388	0.003092
6389	0.003252
6390	0.003165
6391	0.003125
6392	0.003111
6393	0.002922
6394	0.002604
6395	0.002792
6396	0.003005
6397	0.003001
6398	0.002912
6399	0.002804
6400	0.002881
6401	0.002657
6402	0.002748
6403	0.002608
6404	0.002818
6405	0.003106
6406	0.003059
6407	0.002803
6408	0.002437
6409	0.002568
6410	0.002903
6411	0.00316
6412	0.003168
6413	0.002932
6414	0.002691
6415	0.002855
6416	0.003098
6417	0.003048
6418	0.003005
6419	0.002891
6420	0.002874
6421	0.002775
6422	0.002772
6423	0.003023
6424	0.003202
6425	0.003109
6426	0.002917
6427	0.003079
6428	0.002968
6429	0.002532
6430	0.002696
6431	0.002524
6432	0.002683
6433	0.002913
6434	0.003069
6435	0.003026
6436	0.002649
6437	0.002793
6438	0.003086
6439	0.003134
6440	0.003442
6441	0.003607
6442	0.00339
6443	0.002644
6444	0.002604
6445	0.002778
6446	0.003134
6447	0.003211
6448	0.003292
6449	0.003113
6450	0.003045
6451	0.002946
6452	0.002718
6453	0.002687
6454	0.002816
6455	0.00263
6456	0.002504
6457	0.002752
6458	0.002787
6459	0.002809
6460	0.003116
6461	0.003171
6462	0.002796
6463	0.002466
6464	0.002497
6465	0.002472
6466	0.00251
6467	0.002632
6468	0.002723
6469	0.002813
6470	0.002959
6471	0.002492
6472	0.002149
6473	0.002126
6474	0.00247
6475	0.002833
6476	0.002735
6477	0.002415
6478	0.002349
6479	0.002524
6480	0.002655
6481	0.002542
6482	0.002503
6483	0.002811
6484	0.002797
6485	0.002562
6486	0.00233
6487	0.002229
6488	0.002519
6489	0.002602
6490	0.002627
6491	0.002769
6492	0.002926
6493	0.002804
6494	0.00265
6495	0.002409
6496	0.002382
6497	0.002512
6498	0.002777
6499	0.002337
6500	0.002142
6501	0.002411
6502	0.002877
6503	0.003022
6504	0.002755
6505	0.002263
6506	0.002337
6507	0.002398
6508	0.002332
6509	0.002101
6510	0.002319
6511	0.002249
6512	0.001884
6513	0.002451
6514	0.002622
6515	0.002394
6516	0.002322
6517	0.002175
6518	0.002095
6519	0.002315
6520	0.002411
6521	0.002483
6522	0.002495
6523	0.002116
6524	0.002189
6525	0.002591
6526	0.002493
6527	0.002274
6528	0.002356
6529	0.002459
6530	0.002613
6531	0.002569
6532	0.002393
6533	0.002531
6534	0.002823
6535	0.002465
6536	0.002137
6537	0.002213
6538	0.002116
6539	0.002243
6540	0.002473
6541	0.002896
6542	0.00294
6543	0.002667
6544	0.001917
6545	0.001913
6546	0.002139
6547	0.002433
6548	0.002535
6549	0.002274
6550	0.002094
6551	0.002226
6552	0.002419
6553	0.002748
6554	0.002629
6555	0.002326
6556	0.002079
6557	0.002489
6558	0.002372
6559	0.002593
6560	0.002545
6561	0.002497
6562	0.002272
6563	0.002413
6564	0.002191
6565	0.001998
6566	0.00186
6567	0.001837
6568	0.001962
6569	0.001998
6570	0.00218
6571	0.002514
6572	0.00266
6573	0.002488
6574	0.002378
6575	0.002316
6576	0.002434
6577	0.002305
6578	0.001918
6579	0.001672
6580	0.001615
6581	0.001739
6582	0.001804
6583	0.002151
6584	0.001974
6585	0.002257
6586	0.002433
6587	0.002552
6588	0.002358
6589	0.002417
6590	0.002609
6591	0.002958
6592	0.002735
6593	0.002354
6594	0.002111
6595	0.002016
6596	0.001767
6597	0.0016
6598	0.001817
6599	0.001628
6600	0.001665
6601	0.002099
6602	0.002213
6603	0.002142
6604	0.00211
6605	0.002036
6606	0.002244
6607	0.00248
6608	0.002293
6609	0.002345
6610	0.002579
6611	0.002557
6612	0.002397
6613	0.002164
6614	0.001779
6615	0.001521
6616	0.001699
6617	0.001969
6618	0.002202
6619	0.00204
6620	0.001784
6621	0.001536
6622	0.001468
6623	0.001694
6624	0.001876
6625	0.002189
6626	0.002108
6627	0.001982
6628	0.001976
6629	0.001935
6630	0.001731
6631	0.0017
6632	0.001867
6633	0.002441
6634	0.002387
6635	0.00191
6636	0.00198
6637	0.002327
6638	0.002094
6639	0.001831
6640	0.0021
6641	0.0021
6642	0.002345
6643	0.002344
6644	0.001982
6645	0.001922
6646	0.001913
6647	0.002147
6648	0.002351
6649	0.002424
6650	0.00217
6651	0.002022
6652	0.002099
6653	0.001918
6654	0.00198
6655	0.001948
6656	0.002143
6657	0.002099
6658	0.002001
6659	0.001828
6660	0.001729
6661	0.002068
6662	0.002215
6663	0.002324
6664	0.002128
6665	0.002023
6666	0.001988
6667	0.002002
6668	0.001913
6669	0.002064
6670	0.002286
6671	0.002152
6672	0.001786
6673	0.001883
6674	0.002084
6675	0.001815
6676	0.001894
6677	0.002044
6678	0.001998
6679	0.002114
6680	0.001959
6681	0.001547
6682	0.001665
6683	0.002113
6684	0.002232
6685	0.002162
6686	0.002236
6687	0.002276
6688	0.00246
6689	0.002301
6690	0.002006
6691	0.002097
6692	0.002178
6693	0.002255
6694	0.002438
6695	0.002502
6696	0.001948
6697	0.001622
6698	0.001678
6699	0.001801
6700	0.001807
6701	0.002049
6702	0.002415
6703	0.002381
6704	0.002251
6705	0.002163
6706	0.002079
6707	0.001834
6708	0.002132
6709	0.002065
6710	0.00181
6711	0.001576
6712	0.001588
6713	0.001908
6714	0.002292
6715	0.002224
6716	0.002243
6717	0.002343
6718	0.001882
6719	0.00135
6720	0.001658
6721	0.002067
6722	0.002237
6723	0.002024
6724	0.001703
6725	0.001839
6726	0.001906
6727	0.001927
6728	0.001526
6729	0.001479
6730	0.00153
6731	0.001554
6732	0.001518
6733	0.001899
6734	0.002049
6735	0.001844
6736	0.001438
6737	0.001671
6738	0.001824
6739	0.001648
6740	0.001555
6741	0.001685
6742	0.0019
6743	0.001797
6744	0.001914
6745	0.002123
6746	0.001992
6747	0.001975
6748	0.00208
6749	0.002101
6750	0.001784
6751	0.001746
6752	0.001571
6753	0.001648
6754	0.001679
6755	0.001757
6756	0.001609
6757	0.001578
6758	0.001603
6759	0.001771
6760	0.002016
6761	0.001532
6762	0.00159
6763	0.001643
6764	0.001644
6765	0.00194
6766	0.002046
6767	0.001822
6768	0.00182
6769	0.00168
6770	0.001503
6771	0.001294
6772	0.001352
6773	0.001487
6774	0.001587
6775	0.002024
6776	0.002654
6777	0.002626
6778	0.002161
6779	0.001886
6780	0.001618
6781	0.001344
6782	0.001259
6783	0.001535
6784	0.001813
6785	0.001787
6786	0.001605
6787	0.001555
6788	0.001641
6789	0.001955
6790	0.002222
6791	0.001728
6792	0.00184
6793	0.001958
6794	0.001908
6795	0.001966
6796	0.001983
6797	0.001804
6798	0.00215
6799	0.002777
6800	0.002926
6801	0.003007
6802	0.003364
6803	0.003884
6804	0.004247
6805	0.004429
6806	0.004717
6807	0.004797
6808	0.004572
6809	0.004422
6810	0.004475
6811	0.004517
6812	0.004248
6813	0.004164
6814	0.003909
6815	0.004035
6816	0.00401
6817	0.003851
6818	0.00396
6819	0.00417
6820	0.004149
6821	0.004095
6822	0.003865
6823	0.00424
6824	0.004571
6825	0.004546
6826	0.004208
6827	0.004078
6828	0.004071
6829	0.004046
6830	0.00391
6831	0.003674
6832	0.004052
6833	0.004136
6834	0.004076
6835	0.00395
6836	0.003912
6837	0.003774
6838	0.003707
6839	0.003693
6840	0.003564
6841	0.003467
6842	0.003588
6843	0.003922
6844	0.004409
6845	0.00415
6846	0.003675
6847	0.003679
6848	0.003808
6849	0.003521
6850	0.003527
6851	0.003661
6852	0.003392
6853	0.003021
6854	0.003143
6855	0.003485
6856	0.003328
6857	0.003219
6858	0.003383
6859	0.003735
6860	0.003554
6861	0.003126
6862	0.003126
6863	0.00322
6864	0.002925
6865	0.002797
6866	0.003151
6867	0.003351
6868	0.003223
6869	0.00346
6870	0.00337
6871	0.003258
6872	0.003234
6873	0.003302
6874	0.003329
6875	0.003235
6876	0.003325
6877	0.002944
6878	0.003059
6879	0.003216
6880	0.003163
6881	0.00292
6882	0.003039
6883	0.003387
6884	0.003606
6885	0.003386
6886	0.003174
6887	0.003057
6888	0.00289
6889	0.002749
6890	0.003102
6891	0.00308
6892	0.002928
6893	0.003127
6894	0.003534
6895	0.00347
6896	0.003462
6897	0.003322
6898	0.003172
6899	0.002705
6900	0.002606
6901	0.002792
6902	0.002824
6903	0.002849
6904	0.002826
6905	0.002683
6906	0.002786
6907	0.002782
6908	0.002831
6909	0.002813
6910	0.002795
6911	0.00278
6912	0.002818
6913	0.002816
6914	0.002689
6915	0.00269
6916	0.002707
6917	0.002762
6918	0.002651
6919	0.002768
6920	0.002761
6921	0.002703
6922	0.002728
6923	0.002682
6924	0.002981
6925	0.002924
6926	0.002479
6927	0.002462
6928	0.002897
6929	0.002997
6930	0.002469
6931	0.00253
6932	0.002902
6933	0.003573
6934	0.003516
6935	0.00302
6936	0.003016
6937	0.002945
6938	0.002731
6939	0.002491
6940	0.00289
6941	0.002902
6942	0.002733
6943	0.002986
6944	0.002688
6945	0.002527
6946	0.002334
6947	0.00254
6948	0.00282
6949	0.003
6950	0.002878
6951	0.002656
6952	0.002525
6953	0.002405
6954	0.00247
6955	0.002813
6956	0.003018
6957	0.002964
6958	0.002676
6959	0.002783
6960	0.002613
6961	0.002393
6962	0.002621
6963	0.002939
6964	0.00293
6965	0.0029
6966	0.002819
6967	0.003063
6968	0.003032
6969	0.002803
6970	0.002626
6971	0.002311
6972	0.002309
6973	0.002511
6974	0.00262
6975	0.002743
6976	0.002954
6977	0.002564
6978	0.002435
6979	0.002655
6980	0.00261
6981	0.002601
6982	0.002592
6983	0.002623
6984	0.002526
6985	0.002637
6986	0.00278
6987	0.002775
6988	0.002722
6989	0.002723
6990	0.002463
6991	0.002171
6992	0.002364
6993	0.00261
6994	0.002623
6995	0.002355
6996	0.002186
6997	0.002229
6998	0.002269
6999	0.002328
7000	0.002817
7001	0.003022
7002	0.00297
7003	0.002392
7004	0.002138
7005	0.002187
7006	0.002549
7007	0.002442
7008	0.00235
7009	0.002319
7010	0.0026
7011	0.002321
7012	0.002296
7013	0.002438
7014	0.002407
7015	0.002247
7016	0.002311
7017	0.002405
7018	0.002441
7019	0.002327
7020	0.001974
7021	0.002069
7022	0.002535
7023	0.002625
7024	0.002517
7025	0.002354
7026	0.002077
7027	0.002254
7028	0.002004
7029	0.002175
7030	0.0023
7031	0.002134
7032	0.00231
7033	0.002524
7034	0.002519
7035	0.002536
7036	0.002499
7037	0.002513
7038	0.002233
7039	0.002289
7040	0.002412
7041	0.0024
7042	0.002051
7043	0.002177
7044	0.001872
7045	0.00167
7046	0.001633
7047	0.001962
7048	0.00209
7049	0.002256
7050	0.002186
7051	0.002052
7052	0.001907
7053	0.00262
7054	0.00266
7055	0.002202
7056	0.002074
7057	0.001761
7058	0.002044
7059	0.001875
7060	0.001927
7061	0.002051
7062	0.002014
7063	0.002073
7064	0.002183
7065	0.002002
7066	0.00183
7067	0.001953
7068	0.00214
7069	0.002232
7070	0.00221
7071	0.002086
7072	0.002158
7073	0.002445
7074	0.002286
7075	0.002154
7076	0.002129
7077	0.002216
7078	0.002389
7079	0.002355
7080	0.002003
7081	0.001814
7082	0.002197
7083	0.002526
7084	0.002291
7085	0.002204
7086	0.001771
7087	0.002063
7088	0.002242
7089	0.002058
7090	0.001728
7091	0.001311
7092	0.001608
7093	0.002009
7094	0.002335
7095	0.002273
7096	0.002104
7097	0.002214
7098	0.002203
7099	0.00187
7100	0.001765
7101	0.002057
7102	0.002206
7103	0.002217
7104	0.002039
7105	0.002031
7106	0.002168
7107	0.002208
7108	0.001982
7109	0.001942
7110	0.001897
7111	0.001882
7112	0.002043
7113	0.002023
7114	0.001984
7115	0.001992
7116	0.00199
7117	0.001985
7118	0.001903
7119	0.001853
7120	0.00173
7121	0.001807
7122	0.001974
7123	0.001962
7124	0.001962
7125	0.001785
7126	0.001964
7127	0.001754
7128	0.001664
7129	0.001682
7130	0.001828
7131	0.001812
7132	0.001587
7133	0.001497
7134	0.001724
7135	0.001794
7136	0.001677
7137	0.001685
7138	0.002189
7139	0.002266
7140	0.002067
7141	0.001808
7142	0.001401
7143	0.001463
7144	0.001776
7145	0.00197
7146	0.002227
7147	0.002169
7148	0.002104
7149	0.002094
7150	0.001892
7151	0.002005
7152	0.001701
7153	0.001904
7154	0.001795
7155	0.00177
7156	0.002252
7157	0.002374
7158	0.002258
7159	0.002436
7160	0.002365
7161	0.002103
7162	0.002227
7163	0.002217
7164	0.001963
7165	0.001903
7166	0.002147
7167	0.002133
7168	0.001971
7169	0.001703
7170	0.001706
7171	0.00191
7172	0.001993
7173	0.002059
7174	0.002073
7175	0.002309
7176	0.002138
7177	0.001635
7178	0.00191
7179	0.002187
7180	0.002143
7181	0.001711
7182	0.001725
7183	0.001603
7184	0.00149
7185	0.00186
7186	0.002043
7187	0.002038
7188	0.001639
7189	0.001405
7190	0.001295
7191	0.001537
7192	0.00163
7193	0.001697
7194	0.001879
7195	0.001988
7196	0.002037
7197	0.001991
7198	0.001778
7199	0.001599
7200	0.001472
7201	0.001438
7202	0.001686
7203	0.00201
7204	0.001989
7205	0.001836
7206	0.001922
7207	0.001633
7208	0.001891
7209	0.001923
7210	0.001768
7211	0.001812
7212	0.002271
7213	0.002391
7214	0.002143
7215	0.001835
7216	0.002031
7217	0.002221
7218	0.002189
7219	0.00196
7220	0.001611
7221	0.001452
7222	0.001544
7223	0.001926
7224	0.002019
7225	0.001917
7226	0.001795
7227	0.001587
7228	0.001666
7229	0.001967
7230	0.002074
7231	0.002034
7232	0.001801
7233	0.001662
7234	0.001786
7235	0.001924
7236	0.00187
7237	0.001971
7238	0.001853
7239	0.001766
7240	0.001848
7241	0.002371
7242	0.002012
7243	0.00205
7244	0.001743
7245	0.001873
7246	0.001527
7247	0.001276
7248	0.001386
7249	0.001758
7250	0.001823
7251	0.001898
7252	0.002206
7253	0.002564
7254	0.00251
7255	0.002278
7256	0.002411
7257	0.001975
7258	0.001926
7259	0.001999
7260	0.002404
7261	0.002112
7262	0.002121
7263	0.001681
7264	0.001631
7265	0.001875
7266	0.001855
7267	0.001641
7268	0.001485
7269	0.001839
7270	0.001689
7271	0.00161
7272	0.001713
7273	0.001747
7274	0.001701
7275	0.001584
7276	0.002097
7277	0.002546
7278	0.002442
7279	0.001971
7280	0.001479
7281	0.001481
7282	0.001592
7283	0.001585
7284	0.00168
7285	0.001625
7286	0.001918
7287	0.002006
7288	0.00192
7289	0.00206
7290	0.002182
7291	0.002136
7292	0.001987
7293	0.001924
7294	0.002238
7295	0.002065
7296	0.001924
7297	0.001669
7298	0.001527
7299	0.001578
7300	0.001553
7301	0.001691
7302	0.001502
7303	0.001538
7304	0.001659
7305	0.001687
7306	0.001984
7307	0.002006
7308	0.001862
7309	0.002006
7310	0.002115
7311	0.001979
7312	0.001772
7313	0.002149
7314	0.002243
7315	0.002136
7316	0.002016
7317	0.001535
7318	0.00152
7319	0.001504
7320	0.001645
7321	0.001685
7322	0.001712
7323	0.001737
7324	0.001882
7325	0.002003
7326	0.002372
7327	0.002456
7328	0.002011
7329	0.001487
7330	0.001526
7331	0.001851
7332	0.002078
7333	0.001944
7334	0.00187
7335	0.001358
7336	0.001657
7337	0.001931
7338	0.001951
7339	0.0016
7340	0.00164
7341	0.001648
7342	0.00176
7343	0.001773
7344	0.001707
7345	0.001688
7346	0.001821
7347	0.002028
7348	0.001968
7349	0.001744
7350	0.001656
7351	0.00189
7352	0.001762
7353	0.00157
7354	0.001709
7355	0.001457
7356	0.001499
7357	0.001428
7358	0.002108
7359	0.002426
7360	0.00176
7361	0.001648
7362	0.001507
7363	0.001472
7364	0.001532
7365	0.001597
7366	0.002124
7367	0.002174
7368	0.002184
7369	0.001905
7370	0.001888
7371	0.00169
7372	0.001797
7373	0.001619
7374	0.001587
7375	0.002017
7376	0.002167
7377	0.001866
7378	0.001559
7379	0.001603
7380	0.00176
7381	0.001714
7382	0.002014
7383	0.00196
7384	0.002028
7385	0.002059
7386	0.001951
7387	0.001505
7388	0.001677
7389	0.001683
7390	0.0017
7391	0.001708
7392	0.00167
7393	0.0019
7394	0.002305
7395	0.002293
7396	0.001951
7397	0.001758
7398	0.001784
7399	0.0019
7400	0.00214
7401	0.002058
7402	0.002041
7403	0.002192
7404	0.002261
7405	0.002067
7406	0.001933
7407	0.001832
7408	0.002052
7409	0.002408
7410	0.00245
7411	0.002516
7412	0.002442
7413	0.002064
7414	0.002044
7415	0.001956
7416	0.002078
7417	0.002384
7418	0.002325
7419	0.002468
7420	0.00222
7421	0.001786
7422	0.001632
7423	0.001537
7424	0.001467
7425	0.001814
7426	0.002395
7427	0.002601
7428	0.002447
7429	0.002027
7430	0.001763
7431	0.001805
7432	0.001836
7433	0.00182
7434	0.002114
7435	0.002059
7436	0.002069
7437	0.002075
7438	0.002456
7439	0.00257
7440	0.002172
7441	0.001744
7442	0.002016
7443	0.002269
7444	0.002389
7445	0.002248
7446	0.002084
7447	0.002266
7448	0.002376
7449	0.002376
7450	0.002268
7451	0.002318
7452	0.0021
7453	0.001821
7454	0.002041
7455	0.002383
7456	0.002209
7457	0.002024
7458	0.00192
7459	0.002064
7460	0.002615
7461	0.002833
7462	0.002397
7463	0.002613
7464	0.002535
7465	0.002398
7466	0.002245
7467	0.002605
7468	0.002729
7469	0.002675
7470	0.002778
7471	0.002583
7472	0.002254
7473	0.002395
7474	0.002253
7475	0.00211
7476	0.00213
7477	0.002431
7478	0.002663
7479	0.002641
7480	0.002865
7481	0.002955
7482	0.002861
7483	0.002611
7484	0.002552
7485	0.002312
7486	0.002131
7487	0.002204
7488	0.002158
7489	0.002201
7490	0.002432
7491	0.002673
7492	0.002854
7493	0.002764
7494	0.002733
7495	0.002587
7496	0.00249
7497	0.00248
7498	0.002311
7499	0.002419
7500	0.00235
7501	0.002446
7502	0.002756
7503	0.003007
7504	0.003098
7505	0.003228
7506	0.003074
7507	0.003124
7508	0.003168
7509	0.00275
7510	0.002523
7511	0.002681
7512	0.00287
7513	0.00265
7514	0.002532
7515	0.002659
7516	0.002798
7517	0.002821
7518	0.00264
7519	0.002336
7520	0.0024
7521	0.002742
7522	0.003117
7523	0.003231
7524	0.002904
7525	0.002897
7526	0.00295
7527	0.002613
7528	0.002712
7529	0.002532
7530	0.002789
7531	0.003166
7532	0.00334
7533	0.003329
7534	0.003314
7535	0.00337
7536	0.003347
7537	0.003218
7538	0.003281
7539	0.002942
7540	0.002627
7541	0.002903
7542	0.003391
7543	0.003318
7544	0.003438
7545	0.003329
7546	0.00321
7547	0.002895
7548	0.002773
7549	0.003004
7550	0.003229
7551	0.00316
7552	0.003376
7553	0.003314
7554	0.003177
7555	0.003089
7556	0.003031
7557	0.003193
7558	0.003616
7559	0.003337
7560	0.00287
7561	0.002982
7562	0.003246
7563	0.00352
7564	0.003266
7565	0.003271
7566	0.003216
7567	0.003587
7568	0.003621
7569	0.003312
7570	0.00299
7571	0.003011
7572	0.003283
7573	0.00344
7574	0.003426
7575	0.003488
7576	0.003535
7577	0.003615
7578	0.003522
7579	0.003239
7580	0.003153
7581	0.00271
7582	0.002967
7583	0.003319
7584	0.003596
7585	0.003438
7586	0.003595
7587	0.003837
7588	0.003654
7589	0.002969
7590	0.002857
7591	0.002964
7592	0.002765
7593	0.002917
7594	0.003271
7595	0.003425
7596	0.003544
7597	0.003494
7598	0.003549
7599	0.003419
7600	0.003262
7601	0.003173
7602	0.003422
7603	0.003408
7604	0.003297
7605	0.003403
7606	0.003453
7607	0.003281
7608	0.00317
7609	0.003244
7610	0.00314
7611	0.003202
7612	0.003252
7613	0.003268
7614	0.003064
7615	0.002818
7616	0.002924
7617	0.003197
7618	0.003498
7619	0.003609
7620	0.003468
7621	0.003479
7622	0.003452
7623	0.003291
7624	0.003253
7625	0.003217
7626	0.00337
7627	0.003357
7628	0.003373
7629	0.003569
7630	0.003396
7631	0.003243
7632	0.003432
7633	0.003258
7634	0.003082
7635	0.003138
7636	0.003288
7637	0.003138
7638	0.003074
7639	0.003003
7640	0.003293
7641	0.003472
7642	0.003344
7643	0.003075
7644	0.002948
7645	0.00316
7646	0.003597
7647	0.003327
7648	0.003028
7649	0.003151
7650	0.003337
7651	0.003495
7652	0.003638
7653	0.00337
7654	0.003207
7655	0.002889
7656	0.002623
7657	0.002883
7658	0.003003
7659	0.002855
7660	0.003197
7661	0.003369
7662	0.003327
7663	0.0031
7664	0.003044
7665	0.003326
7666	0.003394
7667	0.002979
7668	0.003151
7669	0.003584
7670	0.003821
7671	0.003472
7672	0.003181
7673	0.003062
7674	0.003373
7675	0.00328
7676	0.003498
7677	0.003442
7678	0.003124
7679	0.002666
7680	0.002655
7681	0.002745
7682	0.003003
7683	0.003176
7684	0.003322
7685	0.003153
7686	0.002837
7687	0.003051
7688	0.003267
7689	0.003278
7690	0.002984
7691	0.00285
7692	0.003161
7693	0.003192
7694	0.003004
7695	0.003055
7696	0.003259
7697	0.003137
7698	0.003224
7699	0.002738
7700	0.002716
7701	0.00276
7702	0.003083
7703	0.003325
7704	0.003432
7705	0.003089
7706	0.00289
7707	0.002996
7708	0.00293
7709	0.003061
7710	0.003249
7711	0.003148
7712	0.002922
7713	0.002606
7714	0.002758
7715	0.002936
7716	0.00278
7717	0.002555
7718	0.002792
7719	0.002945
7720	0.002603
7721	0.002641
7722	0.002537
7723	0.002607
7724	0.002678
7725	0.002856
7726	0.002708
7727	0.002948
7728	0.002814
7729	0.002593
7730	0.002748
7731	0.002977
7732	0.002913
7733	0.002776
7734	0.002987
7735	0.002953
7736	0.002836
7737	0.002647
7738	0.00282
7739	0.002893
7740	0.00298
7741	0.002818
7742	0.002822
7743	0.003079
7744	0.003303
7745	0.00309
7746	0.0023
7747	0.002269
7748	0.002579
7749	0.002624
7750	0.002702
7751	0.00271
7752	0.002797
7753	0.002902
7754	0.002608
7755	0.002698
7756	0.002835
7757	0.002568
7758	0.002705
7759	0.002571
7760	0.002537
7761	0.00262
7762	0.002696
7763	0.002572
7764	0.002461
7765	0.002259
7766	0.00206
7767	0.002243
7768	0.00249
7769	0.002657
7770	0.00263
7771	0.002522
7772	0.002641
7773	0.002862
7774	0.002983
7775	0.002546
7776	0.002196
7777	0.00192
7778	0.001987
7779	0.00231
7780	0.002761
7781	0.002556
7782	0.00231
7783	0.002126
7784	0.002128
7785	0.00241
7786	0.002527
7787	0.002596
7788	0.002356
7789	0.002333
7790	0.002229
7791	0.002117
7792	0.002174
7793	0.002376
7794	0.002196
7795	0.002174
7796	0.00244
7797	0.002932
7798	0.002755
7799	0.00254
7800	0.002683
7801	0.0027
7802	0.002314
7803	0.002462
7804	0.002537
7805	0.002681
7806	0.002433
7807	0.002092
7808	0.00196
7809	0.002394
7810	0.002587
7811	0.002537
7812	0.002576
7813	0.002631
7814	0.002729
7815	0.002601
7816	0.002253
7817	0.002321
7818	0.00252
7819	0.002543
7820	0.002535
7821	0.002665
7822	0.002726
7823	0.00263
7824	0.002427
7825	0.002623
7826	0.002881
7827	0.002767
7828	0.002429
7829	0.002023
7830	0.001872
7831	0.002259
7832	0.002315
7833	0.002201
7834	0.002295
7835	0.002178
7836	0.002007
7837	0.002238
7838	0.00221
7839	0.002378
7840	0.002291
7841	0.001862
7842	0.001925
7843	0.002234
7844	0.002361
7845	0.002384
7846	0.002364
7847	0.002343
7848	0.002256
7849	0.002058
7850	0.002377
7851	0.002233
7852	0.002051
7853	0.002129
7854	0.002061
7855	0.002128
7856	0.002338
7857	0.002406
7858	0.002396
7859	0.002268
7860	0.002263
7861	0.002479
7862	0.002516
7863	0.002449
7864	0.002373
7865	0.002107
7866	0.00185
7867	0.001804
7868	0.002027
7869	0.002098
7870	0.002055
7871	0.002427
7872	0.002534
7873	0.002237
7874	0.002246
7875	0.002405
7876	0.002355
7877	0.002488
7878	0.002842
7879	0.002797
7880	0.002384
7881	0.002271
7882	0.001917
7883	0.001831
7884	0.002
7885	0.001986
7886	0.001896
7887	0.001907
7888	0.002062
7889	0.001867
7890	0.001919
7891	0.002309
7892	0.002229
7893	0.002219
7894	0.002629
7895	0.002431
7896	0.00218
7897	0.002213
7898	0.002273
7899	0.002457
7900	0.002721
7901	0.002592
7902	0.002563
7903	0.002212
7904	0.00241
7905	0.002278
7906	0.002212
7907	0.00218
7908	0.002259
7909	0.002086
7910	0.002527
7911	0.002437
7912	0.002444
7913	0.002216
7914	0.002105
7915	0.002043
7916	0.00221
7917	0.002225
7918	0.002134
7919	0.001972
7920	0.001898
7921	0.002231
7922	0.002271
7923	0.002417
7924	0.002408
7925	0.002164
7926	0.001971
7927	0.001923
7928	0.001535
7929	0.001467
7930	0.001864
7931	0.002071
7932	0.002024
7933	0.002062
7934	0.002293
7935	0.002539
7936	0.002305
7937	0.001794
7938	0.001613
7939	0.001838
7940	0.002325
7941	0.002603
7942	0.002371
7943	0.001991
7944	0.002025
7945	0.002019
7946	0.00214
7947	0.001901
7948	0.001975
7949	0.001984
7950	0.00182
7951	0.001734
7952	0.001778
7953	0.002179
7954	0.002142
7955	0.002195
7956	0.002275
7957	0.001965
7958	0.001936
7959	0.002024
7960	0.002287
7961	0.002229
7962	0.001926
7963	0.001961
7964	0.00188
7965	0.001854
7966	0.001968
7967	0.001699
7968	0.001951
7969	0.002122
7970	0.001909
7971	0.002138
7972	0.002243
7973	0.002023
7974	0.001858
7975	0.002104
7976	0.001814
7977	0.001868
7978	0.001902
7979	0.001799
7980	0.00216
7981	0.002297
7982	0.002163
7983	0.001969
7984	0.001932
7985	0.002007
7986	0.002052
7987	0.00205
7988	0.001959
7989	0.001864
7990	0.002006
7991	0.002057
7992	0.002009
7993	0.001815
7994	0.001802
7995	0.002087
7996	0.001685
7997	0.001869
7998	0.001977
[truncated: 3,401 more rows]

## Sheet: FL-WT (B)
Time	UV
6000	2.5
6001	2.5
6002	2.5
6003	2.5
6004	2.5
6005	2.5
6006	2.5
6007	2.5
6008	2.5
6009	2.5
6010	2.5
6011	2.5
6012	2.5
6013	2.5
6014	2.5
6015	2.5
6016	2.5
6017	2.5
6018	2.5
6019	2.5
6020	2.5
6021	2.5
6022	2.5
6023	2.5
6024	2.5
6025	2.5
6026	2.5
6027	2.5
6028	2.5
6029	2.5
6030	2.5
6031	2.5
6032	2.5
6033	2.5
6034	2.5
6035	2.5
6036	2.5
6037	2.5
6038	2.5
6039	2.5
6040	2.5
6041	2.5
6042	2.5
6043	2.5
6044	2.5
6045	2.5
6046	2.5
6047	2.5
6048	2.5
6049	2.5
6050	2.5
6051	2.5
6052	2.5
6053	2.5
6054	2.5
6055	2.5
6056	2.5
6057	2.5
6058	2.5
6059	2.5
6060	2.5
6061	2.5
6062	2.5
6063	2.5
6064	2.5
6065	2.5
6066	2.5
6067	2.5
6068	2.5
6069	2.5
6070	2.5
6071	2.5
6072	2.5
6073	2.5
6074	2.5
6075	2.5
6076	2.5
6077	2.5
6078	2.5
6079	2.5
6080	2.5
6081	2.5
6082	2.5
6083	2.5
6084	2.5
6085	2.5
6086	2.5
6087	2.5
6088	2.5
6089	2.5
6090	2.5
6091	2.5
6092	2.5
6093	2.5
6094	2.5
6095	2.5
6096	2.5
6097	2.5
6098	2.5
6099	2.5
6100	2.5
6101	2.5
6102	2.5
6103	2.5
6104	2.5
6105	2.5
6106	2.5
6107	2.5
6108	2.5
6109	2.5
6110	2.5
6111	2.5
6112	2.5
6113	2.5
6114	2.5
6115	2.5
6116	2.5
6117	2.5
6118	2.5
6119	2.5
6120	2.5
6121	2.5
6122	2.5
6123	2.5
6124	2.5
6125	2.5
6126	2.5
6127	2.5
6128	2.5
6129	2.5
6130	2.5
6131	2.5
6132	2.5
6133	2.5
6134	2.5
6135	2.5
6136	2.5
6137	2.5
6138	2.5
6139	2.5
6140	2.5
6141	2.5
6142	2.5
6143	2.5
6144	2.5
6145	2.5
6146	2.5
6147	2.5
6148	2.5
6149	2.5
6150	2.5
6151	2.5
6152	2.5
6153	2.5
6154	2.5
6155	2.5
6156	2.5
6157	2.5
6158	2.5
6159	2.5
6160	2.5
6161	2.5
6162	2.5
6163	2.5
6164	2.5
6165	2.5
6166	2.5
6167	2.5
6168	2.5
6169	2.5
6170	2.5
6171	2.5
6172	2.5
6173	2.5
6174	2.5
6175	2.5
6176	2.5
6177	2.5
6178	2.5
6179	2.5
6180	2.5
6181	2.5
6182	2.5
6183	2.5
6184	2.5
6185	2.5
6186	2.5
6187	2.5
6188	2.5
6189	2.5
6190	2.5
6191	2.5
6192	2.5
6193	2.5
6194	2.5
6195	2.5
6196	2.5
6197	2.5
6198	2.5
6199	2.5
6200	2.5
6201	2.5
6202	2.5
6203	2.5
6204	2.5
6205	2.5
6206	2.5
6207	2.5
6208	2.5
6209	2.5
6210	2.5
6211	2.5
6212	2.5
6213	2.5
6214	2.5
6215	2.5
6216	2.5
6217	2.5
6218	2.5
6219	2.5
6220	2.5
6221	2.5
6222	2.5
6223	2.5
6224	2.5
6225	2.5
6226	2.5
6227	2.5
6228	2.5
6229	2.5
6230	2.5
6231	2.5
6232	2.5
6233	2.5
6234	2.5
6235	2.5
6236	2.5
6237	2.5
6238	2.5
6239	0
6240	0
6241	-2e-05
6242	-2.8e-05
6243	-2e-06
6244	-3e-05
6245	-0.000194
6246	-0.000156
6247	-0.000106
6248	-0.000146
6249	-0.000124
6250	-4.2e-05
6251	-0.000132
6252	-0.00026
6253	-0.000357
6254	-0.000237
6255	-0.000218
6256	-0.000146
6257	-5.6e-05
6258	-4.1e-05
6259	-0.000125
6260	-0.000121
6261	-3.8e-05
6262	7.4e-05
6263	7.4e-05
6264	2.7e-05
6265	5.2e-05
6266	4.1e-05
6267	0.000108
6268	4.4e-05
6269	-0.00019
6270	-0.000221
6271	-0.000209
6272	-0.000125
6273	-6.6e-05
6274	-0.000114
6275	-0.000248
6276	-0.000333
6277	-0.000391
6278	-0.000498
6279	-0.000442
6280	-0.000416
6281	-0.000244
6282	-0.000137
6283	-0.000119
6284	-0.00012
6285	-0.000226
6286	-0.000209
6287	-0.000176
6288	-9e-06
6289	-1.8e-05
6290	-0.000174
6291	-0.000281
6292	-0.00033
6293	-0.000446
6294	-0.000491
6295	-0.000624
6296	-0.000772
6297	-0.000646
6298	-0.000543
6299	-0.000601
6300	-0.00072
6301	-0.000785
6302	-0.000896
6303	-0.000842
6304	-0.000971
6305	-0.000969
6306	-0.000934
6307	-0.000799
6308	-0.000665
6309	-0.000707
6310	-0.000767
6311	-0.000933
6312	-0.000946
6313	-0.000932
6314	-0.000963
6315	-0.001108
6316	-0.001286
6317	-0.001299
6318	-0.001203
6319	-0.001183
6320	-0.001053
6321	-0.001025
6322	-0.001199
6323	-0.001279
6324	-0.001145
6325	-0.001106
6326	-0.001142
6327	-0.001088
6328	-0.000957
6329	-0.001077
6330	-0.00124
6331	-0.001065
6332	-0.001041
6333	-0.001026
6334	-0.000983
6335	-0.001001
6336	-0.001093
6337	-0.001039
6338	-0.001148
6339	-0.001004
6340	-0.000814
6341	-0.000878
6342	-0.000937
6343	-0.000982
6344	-0.001113
6345	-0.001035
6346	-0.000743
6347	-0.000467
6348	-0.000457
6349	-0.000592
6350	-0.000602
6351	-0.000665
6352	-0.000823
6353	-0.000858
6354	-0.000839
6355	-0.000857
6356	-0.000897
6357	-0.000859
6358	-0.000796
6359	-0.000752
6360	-0.00058
6361	-0.000561
6362	-0.000582
6363	-0.000618
6364	-0.000625
6365	-0.000697
6366	-0.000681
6367	-0.000832
6368	-0.000795
6369	-0.000693
6370	-0.000537
6371	-0.000556
6372	-0.000745
6373	-0.000851
6374	-0.000799
6375	-0.000704
6376	-0.000811
6377	-0.000748
6378	-0.000665
6379	-0.000569
6380	-0.000648
6381	-0.00065
6382	-0.000606
6383	-0.000581
6384	-0.000477
6385	-0.000486
6386	-0.00056
6387	-0.000665
6388	-0.000728
6389	-0.000775
6390	-0.000926
6391	-0.000907
6392	-0.000792
6393	-0.000766
6394	-0.000759
6395	-0.000851
6396	-0.000915
6397	-0.000803
6398	-0.000771
6399	-0.000817
6400	-0.000846
6401	-0.000962
6402	-0.001083
6403	-0.001114
6404	-0.001063
6405	-0.001029
6406	-0.00095
6407	-0.000962
6408	-0.00107
6409	-0.001074
6410	-0.001026
6411	-0.001046
6412	-0.00104
6413	-0.000968
6414	-0.001021
6415	-0.000963
6416	-0.000831
6417	-0.000863
6418	-0.000993
6419	-0.000989
6420	-0.000957
6421	-0.000804
6422	-0.000732
6423	-0.000703
6424	-0.000743
6425	-0.000773
6426	-0.000888
6427	-0.000881
6428	-0.001044
6429	-0.001123
6430	-0.001117
6431	-0.001078
6432	-0.001007
6433	-0.000949
6434	-0.000969
6435	-0.000892
6436	-0.000839
6437	-0.000755
6438	-0.000912
6439	-0.001134
6440	-0.001285
6441	-0.001093
6442	-0.000972
6443	-0.000983
6444	-0.001142
6445	-0.001253
6446	-0.001214
6447	-0.000978
6448	-0.000806
6449	-0.000852
6450	-0.001051
6451	-0.001142
6452	-0.001009
6453	-0.000931
6454	-0.001048
6455	-0.001134
6456	-0.001141
6457	-0.001064
6458	-0.000947
6459	-0.000909
6460	-0.001092
6461	-0.001107
6462	-0.001028
6463	-0.00093
6464	-0.000957
6465	-0.000992
6466	-0.000996
6467	-0.000951
6468	-0.00102
6469	-0.001111
6470	-0.001114
6471	-0.001044
6472	-0.000938
6473	-0.000886
6474	-0.000924
6475	-0.000813
6476	-0.00083
6477	-0.000847
6478	-0.000879
6479	-0.000781
6480	-0.000755
6481	-0.000797
6482	-0.000939
6483	-0.001108
6484	-0.001102
6485	-0.001054
6486	-0.001015
6487	-0.001026
6488	-0.001072
6489	-0.001091
6490	-0.001059
6491	-0.001014
6492	-0.000864
6493	-0.000844
6494	-0.001009
6495	-0.001087
6496	-0.001091
6497	-0.001112
6498	-0.001047
6499	-0.000911
6500	-0.000966
6501	-0.001134
6502	-0.001207
6503	-0.001223
6504	-0.001345
6505	-0.001549
6506	-0.001575
6507	-0.00151
6508	-0.001471
6509	-0.00138
6510	-0.001341
6511	-0.001197
6512	-0.001145
6513	-0.001231
6514	-0.001459
6515	-0.001568
6516	-0.00147
6517	-0.001242
6518	-0.0012
6519	-0.001378
6520	-0.001455
6521	-0.001389
6522	-0.001325
6523	-0.001375
6524	-0.001331
6525	-0.001349
6526	-0.001275
6527	-0.001314
6528	-0.001269
6529	-0.001291
6530	-0.00135
6531	-0.001334
6532	-0.001255
6533	-0.001256
6534	-0.001283
6535	-0.001392
6536	-0.001469
6537	-0.001391
6538	-0.001362
6539	-0.001306
6540	-0.001336
6541	-0.001452
6542	-0.001478
6543	-0.001328
6544	-0.00129
6545	-0.001299
6546	-0.001378
6547	-0.00151
6548	-0.001476
6549	-0.001282
6550	-0.001098
6551	-0.001137
6552	-0.0012
6553	-0.001184
6554	-0.001041
6555	-0.001052
6556	-0.001274
6557	-0.001409
6558	-0.001344
6559	-0.001199
6560	-0.001172
6561	-0.001151
6562	-0.001062
6563	-0.001031
6564	-0.001219
6565	-0.001298
6566	-0.00135
6567	-0.001257
6568	-0.001273
6569	-0.001291
6570	-0.001365
6571	-0.0015
6572	-0.001597
6573	-0.001677
6574	-0.001617
6575	-0.001488
6576	-0.001378
6577	-0.001323
6578	-0.001206
6579	-0.00127
6580	-0.001452
6581	-0.001402
6582	-0.001401
6583	-0.001318
6584	-0.001318
6585	-0.001195
6586	-0.001151
6587	-0.001016
6588	-0.001199
6589	-0.001338
6590	-0.001407
6591	-0.001281
6592	-0.001198
6593	-0.001298
6594	-0.001302
6595	-0.001117
6596	-0.001161
6597	-0.001284
6598	-0.00125
6599	-0.001238
6600	-0.001337
6601	-0.001335
6602	-0.001303
6603	-0.001286
6604	-0.001411
6605	-0.001501
6606	-0.001471
6607	-0.001375
6608	-0.001362
6609	-0.001406
6610	-0.00145
6611	-0.001398
6612	-0.001283
6613	-0.001416
6614	-0.00151
6615	-0.001496
6616	-0.001396
6617	-0.001357
6618	-0.001333
6619	-0.001362
6620	-0.001314
6621	-0.001289
6622	-0.001309
6623	-0.001421
6624	-0.001351
6625	-0.001219
6626	-0.001222
6627	-0.001255
6628	-0.001286
6629	-0.001248
6630	-0.001302
6631	-0.001351
6632	-0.001434
6633	-0.001357
6634	-0.001251
6635	-0.001148
6636	-0.001289
6637	-0.001353
6638	-0.001221
6639	-0.001221
6640	-0.001169
6641	-0.001133
6642	-0.001184
6643	-0.001262
6644	-0.000956
6645	-0.000791
6646	-0.000928
6647	-0.001269
6648	-0.001466
6649	-0.001473
6650	-0.00148
6651	-0.001405
6652	-0.001372
6653	-0.001364
6654	-0.00137
6655	-0.001202
6656	-0.001126
6657	-0.001123
6658	-0.00122
6659	-0.001424
6660	-0.001552
6661	-0.001504
6662	-0.001463
6663	-0.001366
6664	-0.001264
6665	-0.001259
6666	-0.001231
6667	-0.001135
6668	-0.001153
6669	-0.001159
6670	-0.001243
6671	-0.001406
6672	-0.001373
6673	-0.001332
6674	-0.001378
6675	-0.001443
6676	-0.001282
6677	-0.001178
6678	-0.00117
6679	-0.001283
6680	-0.00139
6681	-0.00129
6682	-0.001169
6683	-0.001133
6684	-0.001151
6685	-0.001141
6686	-0.001209
6687	-0.001126
6688	-0.001124
6689	-0.001212
6690	-0.001344
6691	-0.001232
6692	-0.00118
6693	-0.001087
6694	-0.001068
6695	-0.001076
6696	-0.001149
6697	-0.001144
6698	-0.001047
6699	-0.001006
6700	-0.00109
6701	-0.001198
6702	-0.001232
6703	-0.001198
6704	-0.001091
6705	-0.001055
6706	-0.001116
6707	-0.001232
6708	-0.001258
6709	-0.001099
6710	-0.001096
6711	-0.001041
6712	-0.001033
6713	-0.00091
6714	-0.000701
6715	-0.000598
6716	-0.000564
6717	-0.000607
6718	-0.000623
6719	-0.000453
6720	-0.000472
6721	-0.000607
6722	-0.000759
6723	-0.000906
6724	-0.001037
6725	-0.000973
6726	-0.000916
6727	-0.000793
6728	-0.000766
6729	-0.000782
6730	-0.000854
6731	-0.00091
6732	-0.000977
6733	-0.001018
6734	-0.000939
6735	-0.000814
6736	-0.000933
6737	-0.000988
6738	-0.00095
6739	-0.000944
6740	-0.000907
6741	-0.000902
6742	-0.00106
6743	-0.001041
6744	-0.001131
6745	-0.001068
6746	-0.000976
6747	-0.00087
6748	-0.000837
6749	-0.000899
6750	-0.000922
6751	-0.001016
6752	-0.001039
6753	-0.001017
6754	-0.000981
6755	-0.00099
6756	-0.000913
6757	-0.00102
6758	-0.001072
6759	-0.001096
6760	-0.001116
6761	-0.001165
6762	-0.001043
6763	-0.000959
6764	-0.000923
6765	-0.000902
6766	-0.001015
6767	-0.001001
6768	-0.000756
6769	-0.000661
6770	-0.000874
6771	-0.000943
6772	-0.000898
6773	-0.000868
6774	-0.000959
6775	-0.001015
6776	-0.000923
6777	-0.000903
6778	-0.000823
6779	-0.000595
6780	-0.00059
6781	-0.000777
6782	-0.001034
6783	-0.000991
6784	-0.000924
6785	-0.000969
6786	-0.001026
6787	-0.001134
6788	-0.001173
6789	-0.000956
6790	-0.000816
6791	-0.000804
6792	-0.000953
6793	-0.001179
6794	-0.001252
6795	-0.001196
6796	-0.001067
6797	-0.000995
6798	-0.001074
6799	-0.001056
6800	-0.001008
6801	-0.000988
6802	-0.000951
6803	-0.000948
6804	-0.000984
6805	-0.000962
6806	-0.000943
6807	-0.000999
6808	-0.001081
6809	-0.001066
6810	-0.001065
6811	-0.001054
6812	-0.001098
6813	-0.001098
6814	-0.001181
6815	-0.001111
6816	-0.000925
6817	-0.000889
6818	-0.001015
6819	-0.000964
6820	-0.000926
6821	-0.001004
6822	-0.001087
6823	-0.001155
6824	-0.001271
6825	-0.00114
6826	-0.001133
6827	-0.001232
6828	-0.001319
6829	-0.001373
6830	-0.001359
6831	-0.00139
6832	-0.001304
6833	-0.001201
6834	-0.001149
6835	-0.001144
6836	-0.001134
6837	-0.001169
6838	-0.001038
6839	-0.001004
6840	-0.001003
6841	-0.000973
6842	-0.00092
6843	-0.000996
6844	-0.000978
6845	-0.000955
6846	-0.001124
6847	-0.001203
6848	-0.001253
6849	-0.001353
6850	-0.001487
6851	-0.001464
6852	-0.001378
6853	-0.001019
6854	-0.000899
6855	-0.001035
6856	-0.001158
6857	-0.00117
6858	-0.001173
6859	-0.001183
6860	-0.001135
6861	-0.001197
6862	-0.001383
6863	-0.001492
6864	-0.001376
6865	-0.001241
6866	-0.001168
6867	-0.001157
6868	-0.001138
6869	-0.001033
6870	-0.001111
6871	-0.001117
6872	-0.001062
6873	-0.001013
6874	-0.000999
6875	-0.001114
6876	-0.0011
6877	-0.001104
6878	-0.001027
6879	-0.000959
6880	-0.000804
6881	-0.000698
6882	-0.000749
6883	-0.000877
6884	-0.000827
6885	-0.000812
6886	-0.000889
6887	-0.001021
6888	-0.001058
6889	-0.001044
6890	-0.000938
6891	-0.000989
6892	-0.001062
6893	-0.001249
6894	-0.001324
6895	-0.001304
6896	-0.001214
6897	-0.001159
6898	-0.001078
6899	-0.000982
6900	-0.001006
6901	-0.001149
6902	-0.001267
6903	-0.001303
6904	-0.001248
6905	-0.001177
6906	-0.001121
6907	-0.001092
6908	-0.001118
6909	-0.001186
6910	-0.001219
6911	-0.001049
6912	-0.000895
6913	-0.000972
6914	-0.001074
6915	-0.001063
6916	-0.000932
6917	-0.000846
6918	-0.000727
6919	-0.000744
6920	-0.001002
6921	-0.0011
6922	-0.000922
6923	-0.000937
6924	-0.001064
6925	-0.001117
6926	-0.001042
6927	-0.000971
6928	-0.000851
6929	-0.000781
6930	-0.000798
6931	-0.000751
6932	-0.000769
6933	-0.000722
6934	-0.000616
6935	-0.000452
6936	-0.000457
6937	-0.000556
6938	-0.000495
6939	-0.000394
6940	-0.000441
6941	-0.000548
6942	-0.000465
6943	-0.000405
6944	-0.000267
6945	-0.000267
6946	-0.000378
6947	-0.000436
6948	-0.000366
6949	-0.000364
6950	-0.000478
6951	-0.000654
6952	-0.000604
6953	-0.000514
6954	-0.00041
6955	-0.000276
6956	-0.000365
6957	-0.000286
6958	-0.000117
6959	-0.000158
6960	-0.000189
6961	-0.000351
6962	-0.000485
6963	-0.000506
6964	-0.000435
6965	-0.000353
6966	-0.000264
6967	-0.000327
6968	-0.000402
6969	-0.000353
6970	-0.000272
6971	-0.000185
6972	-0.000164
6973	-0.000239
6974	-0.000287
6975	-0.000281
6976	-0.00036
6977	-0.000355
6978	-0.000357
6979	-0.000307
6980	-0.00027
6981	-0.000188
6982	-0.000197
6983	-0.00019
6984	-0.000243
6985	-0.000269
6986	-0.000237
6987	-0.000247
6988	-0.000223
6989	-0.000207
6990	-0.000298
6991	-0.000343
6992	-0.000366
6993	-0.000403
6994	-0.000362
6995	-0.000327
6996	-0.000372
6997	-0.000569
6998	-0.000607
6999	-0.000476
7000	-0.000359
7001	-0.000322
7002	-0.000273
7003	-0.000278
7004	-0.000265
7005	-0.000416
7006	-0.000451
7007	-0.000353
7008	-0.000171
7009	-0.000165
7010	-0.000182
7011	-0.000259
7012	-0.000373
7013	-0.000359
7014	-0.000232
7015	-0.000229
7016	-0.000359
7017	-0.000412
7018	-0.000345
7019	-0.000115
7020	-8.3e-05
7021	-0.000125
7022	-0.000203
7023	-9.5e-05
7024	-5.4e-05
7025	2.8e-05
7026	1.1e-05
7027	0.000124
7028	8.4e-05
7029	0.000125
7030	0.000124
7031	0
7032	-0.000132
7033	-0.000293
7034	-0.000272
7035	-0.000232
7036	-0.000145
7037	-0.000107
7038	-0.000138
7039	-0.000293
7040	-0.000395
7041	-0.000393
7042	-0.000419
7043	-0.000393
7044	-0.000324
7045	-0.000379
7046	-0.00048
7047	-0.000617
7048	-0.000616
7049	-0.000501
7050	-0.000512
7051	-0.000463
7052	-0.000404
7053	-0.000306
7054	-0.000197
7055	-0.000106
7056	-0.00018
7057	-0.000292
7058	-0.000399
7059	-0.000373
7060	-0.000288
7061	-0.000347
7062	-0.000488
7063	-0.000549
7064	-0.000503
7065	-0.000508
7066	-0.000325
7067	-0.000173
7068	-0.000264
7069	-0.000408
7070	-0.000347
7071	-0.000412
7072	-0.000474
7073	-0.000538
7074	-0.000452
7075	-0.000189
7076	-0.00013
7077	-7.7e-05
7078	1e-06
7079	7.8e-05
7080	0.00017
7081	0.000317
7082	0.000183
7083	0.000117
7084	0.000145
7085	-4.8e-05
7086	-0.000225
7087	-0.000189
7088	-0.000158
7089	-0.000279
7090	-0.000504
7091	-0.000461
7092	-0.000265
7093	-0.000225
7094	-0.000392
7095	-0.000661
7096	-0.00105
7097	-0.001204
7098	-0.001173
7099	-0.001195
7100	-0.001101
7101	-0.001022
7102	-0.000996
7103	-0.000999
7104	-0.001033
7105	-0.001076
7106	-0.001019
7107	-0.000995
7108	-0.001084
7109	-0.001204
7110	-0.001208
7111	-0.000964
7112	-0.0008
7113	-0.000916
7114	-0.000867
7115	-0.000827
7116	-0.000919
7117	-0.000885
7118	-0.000862
7119	-0.000925
7120	-0.000866
7121	-0.000746
7122	-0.000742
7123	-0.000826
7124	-0.000849
7125	-0.000745
7126	-0.000665
7127	-0.000735
7128	-0.000802
7129	-0.000763
7130	-0.000699
7131	-0.00088
7132	-0.000945
7133	-0.000842
7134	-0.000654
7135	-0.000697
7136	-0.000867
7137	-0.000909
7138	-0.000845
7139	-0.000705
7140	-0.0009
7141	-0.001112
7142	-0.001156
7143	-0.001036
7144	-0.000838
7145	-0.000808
7146	-0.000755
7147	-0.000842
7148	-0.000891
7149	-0.000757
7150	-0.000715
7151	-0.000662
7152	-0.000702
7153	-0.000946
7154	-0.001179
7155	-0.001258
7156	-0.001186
7157	-0.001021
7158	-0.000853
7159	-0.000881
7160	-0.001053
7161	-0.001146
7162	-0.001239
7163	-0.001288
7164	-0.001234
7165	-0.001161
7166	-0.001126
7167	-0.001208
7168	-0.001154
7169	-0.001359
7170	-0.001343
7171	-0.001242
7172	-0.001282
7173	-0.001267
7174	-0.001236
7175	-0.001236
7176	-0.001287
7177	-0.00115
7178	-0.000947
7179	-0.001114
7180	-0.001396
7181	-0.001338
7182	-0.001294
7183	-0.001393
7184	-0.001496
7185	-0.001477
7186	-0.001317
7187	-0.001235
7188	-0.001223
7189	-0.001234
7190	-0.001214
7191	-0.001189
7192	-0.001356
7193	-0.001356
7194	-0.001237
7195	-0.001186
7196	-0.001282
7197	-0.001163
7198	-0.001146
7199	-0.001201
7200	-0.001254
7201	-0.001307
7202	-0.00124
7203	-0.001333
7204	-0.001414
7205	-0.001344
7206	-0.001453
7207	-0.001456
7208	-0.001495
7209	-0.001425
7210	-0.001302
7211	-0.001301
7212	-0.001315
7213	-0.00123
7214	-0.001136
7215	-0.001044
7216	-0.001122
7217	-0.001141
7218	-0.00122
7219	-0.001419
7220	-0.001461
7221	-0.001289
7222	-0.001237
7223	-0.001188
7224	-0.001133
7225	-0.001161
7226	-0.00128
7227	-0.00136
7228	-0.001456
7229	-0.001357
7230	-0.001259
7231	-0.001276
7232	-0.001377
7233	-0.001514
7234	-0.001564
7235	-0.001589
7236	-0.001528
7237	-0.0015
7238	-0.001452
7239	-0.001446
7240	-0.001508
7241	-0.001595
7242	-0.001569
7243	-0.00159
7244	-0.0016
7245	-0.001568
7246	-0.001498
7247	-0.001461
7248	-0.00139
7249	-0.001383
7250	-0.001571
7251	-0.001645
7252	-0.001547
7253	-0.001465
7254	-0.001412
7255	-0.001278
7256	-0.001305
7257	-0.001367
7258	-0.001247
7259	-0.001152
7260	-0.00123
7261	-0.00126
7262	-0.001195
7263	-0.001206
7264	-0.001326
7265	-0.001444
7266	-0.001374
7267	-0.001365
7268	-0.001286
7269	-0.001098
7270	-0.001043
7271	-0.001295
7272	-0.001418
7273	-0.00153
7274	-0.001668
7275	-0.00155
7276	-0.001425
7277	-0.001301
7278	-0.001411
7279	-0.001494
7280	-0.001619
7281	-0.001699
7282	-0.001761
7283	-0.00174
7284	-0.00163
7285	-0.001447
7286	-0.001508
7287	-0.001642
7288	-0.001742
7289	-0.001694
7290	-0.001669
7291	-0.001751
7292	-0.001779
7293	-0.001723
7294	-0.001668
7295	-0.00167
7296	-0.001651
7297	-0.001601
7298	-0.001581
7299	-0.001577
7300	-0.001495
7301	-0.001519
7302	-0.00164
7303	-0.001652
7304	-0.001624
7305	-0.00157
7306	-0.001609
7307	-0.001605
7308	-0.001667
7309	-0.001706
7310	-0.001531
7311	-0.001403
7312	-0.001484
7313	-0.001649
7314	-0.001536
7315	-0.001483
7316	-0.001495
7317	-0.001458
7318	-0.001549
7319	-0.001509
7320	-0.001451
7321	-0.001301
7322	-0.001257
7323	-0.001332
7324	-0.00145
7325	-0.001421
7326	-0.001291
7327	-0.001259
7328	-0.001351
7329	-0.001462
7330	-0.001415
7331	-0.001344
7332	-0.001297
7333	-0.001377
7334	-0.001525
7335	-0.001573
7336	-0.001494
7337	-0.001551
7338	-0.001673
7339	-0.001661
7340	-0.001612
7341	-0.001763
7342	-0.001644
7343	-0.001492
7344	-0.001434
7345	-0.001374
7346	-0.001418
7347	-0.001559
7348	-0.001674
7349	-0.00157
7350	-0.001399
7351	-0.001421
7352	-0.001528
7353	-0.001546
7354	-0.001438
7355	-0.00132
7356	-0.001405
7357	-0.00152
7358	-0.00148
7359	-0.001375
7360	-0.001351
7361	-0.001349
7362	-0.001431
7363	-0.001615
7364	-0.001636
7365	-0.001649
7366	-0.001614
7367	-0.001582
7368	-0.00162
7369	-0.00155
7370	-0.001353
7371	-0.001346
7372	-0.001457
7373	-0.001471
7374	-0.001347
7375	-0.001425
7376	-0.001477
7377	-0.001474
7378	-0.001518
7379	-0.001527
7380	-0.001579
7381	-0.001518
7382	-0.001488
7383	-0.001466
7384	-0.001526
7385	-0.001432
7386	-0.001437
7387	-0.001505
7388	-0.001516
7389	-0.001432
7390	-0.001317
7391	-0.001289
7392	-0.001184
7393	-0.001128
7394	-0.001305
7395	-0.001333
7396	-0.001281
7397	-0.001104
7398	-0.001237
7399	-0.00116
7400	-0.001138
7401	-0.001285
7402	-0.001287
7403	-0.001174
7404	-0.001188
7405	-0.001286
7406	-0.001165
7407	-0.001067
7408	-0.001031
7409	-0.000972
7410	-0.00111
7411	-0.001026
7412	-0.000741
7413	-0.000798
7414	-0.001008
7415	-0.001029
7416	-0.000963
7417	-0.000901
7418	-0.000865
7419	-0.000983
7420	-0.001115
7421	-0.001101
7422	-0.001135
7423	-0.001014
7424	-0.000977
7425	-0.000998
7426	-0.001041
7427	-0.001058
7428	-0.000963
7429	-0.000904
7430	-0.000896
7431	-0.000988
7432	-0.001016
7433	-0.000883
7434	-0.000766
7435	-0.000836
7436	-0.00094
7437	-0.000844
7438	-0.000829
7439	-0.000911
7440	-0.000959
7441	-0.000959
7442	-0.000874
7443	-0.000834
7444	-0.000758
7445	-0.001032
7446	-0.001353
7447	-0.001187
7448	-0.001102
7449	-0.001183
7450	-0.001192
7451	-0.001188
7452	-0.001222
7453	-0.0011
7454	-0.000977
7455	-0.001077
7456	-0.00128
7457	-0.001393
7458	-0.00129
7459	-0.001307
7460	-0.001273
7461	-0.001174
7462	-0.001242
7463	-0.001483
7464	-0.001603
7465	-0.001443
7466	-0.001191
7467	-0.001248
7468	-0.001353
7469	-0.001517
7470	-0.001518
7471	-0.001456
7472	-0.00141
7473	-0.001464
7474	-0.00148
7475	-0.001403
7476	-0.00129
7477	-0.00126
7478	-0.001314
7479	-0.001336
7480	-0.001319
7481	-0.001381
7482	-0.00138
7483	-0.001293
7484	-0.001274
7485	-0.001304
7486	-0.00119
7487	-0.001109
7488	-0.001179
7489	-0.001257
7490	-0.001195
7491	-0.001196
7492	-0.001078
7493	-0.001192
7494	-0.001455
7495	-0.001439
7496	-0.001207
7497	-0.001184
7498	-0.001246
7499	-0.001322
7500	-0.00129
7501	-0.001344
7502	-0.00133
7503	-0.001223
7504	-0.001308
7505	-0.001428
7506	-0.001437
7507	-0.001385
7508	-0.001391
7509	-0.001448
7510	-0.001439
7511	-0.001494
7512	-0.001454
7513	-0.00133
7514	-0.001355
7515	-0.001355
7516	-0.001401
7517	-0.001373
7518	-0.001452
7519	-0.001486
7520	-0.001467
7521	-0.001511
7522	-0.001499
7523	-0.001411
7524	-0.001312
7525	-0.001392
7526	-0.001503
7527	-0.00146
7528	-0.001433
7529	-0.001418
7530	-0.001344
7531	-0.00122
7532	-0.001361
7533	-0.001435
7534	-0.001356
7535	-0.001312
7536	-0.001543
7537	-0.001625
7538	-0.001483
7539	-0.001426
7540	-0.001492
7541	-0.001548
7542	-0.001607
7543	-0.001593
7544	-0.001601
7545	-0.001537
7546	-0.001488
7547	-0.001583
7548	-0.001734
7549	-0.001676
7550	-0.001545
7551	-0.00144
7552	-0.001422
7553	-0.001611
7554	-0.001586
7555	-0.001435
7556	-0.001346
7557	-0.001577
7558	-0.001681
7559	-0.001735
7560	-0.001613
7561	-0.001667
7562	-0.00163
7563	-0.001574
7564	-0.00159
7565	-0.001692
7566	-0.001672
7567	-0.001655
7568	-0.001779
7569	-0.001804
7570	-0.001725
7571	-0.001616
7572	-0.001662
7573	-0.00164
7574	-0.00166
7575	-0.001751
7576	-0.001719
7577	-0.001671
7578	-0.001688
7579	-0.001827
7580	-0.001845
7581	-0.001793
7582	-0.001732
7583	-0.001669
7584	-0.001608
7585	-0.001708
7586	-0.001707
7587	-0.001771
7588	-0.001674
7589	-0.001581
7590	-0.001627
7591	-0.001698
7592	-0.001572
7593	-0.001422
7594	-0.00161
7595	-0.001759
7596	-0.001805
7597	-0.001753
7598	-0.001606
7599	-0.001541
7600	-0.00161
7601	-0.0018
7602	-0.001893
7603	-0.001829
7604	-0.00187
7605	-0.001835
7606	-0.001946
7607	-0.002
7608	-0.002036
7609	-0.001955
7610	-0.00183
7611	-0.001811
7612	-0.001813
7613	-0.001784
7614	-0.001639
7615	-0.001507
7616	-0.00153
7617	-0.001686
7618	-0.001581
7619	-0.00165
7620	-0.001578
7621	-0.001522
7622	-0.001579
7623	-0.001716
7624	-0.001702
7625	-0.001586
7626	-0.001577
7627	-0.001552
7628	-0.001515
7629	-0.001463
7630	-0.001397
7631	-0.001342
7632	-0.001329
7633	-0.001447
7634	-0.00136
7635	-0.001314
7636	-0.001526
7637	-0.001585
7638	-0.001591
7639	-0.001699
7640	-0.001658
7641	-0.001548
7642	-0.001509
7643	-0.001388
7644	-0.001303
7645	-0.001278
7646	-0.00134
7647	-0.001373
7648	-0.001419
7649	-0.00139
7650	-0.001354
7651	-0.001434
7652	-0.001333
7653	-0.001306
7654	-0.001423
7655	-0.001471
7656	-0.001361
7657	-0.001139
7658	-0.001043
7659	-0.001029
7660	-0.001112
7661	-0.001003
7662	-0.00087
7663	-0.000765
7664	-0.000849
7665	-0.001049
7666	-0.00113
7667	-0.001138
7668	-0.00118
7669	-0.001129
7670	-0.001187
7671	-0.00125
7672	-0.001145
7673	-0.000943
7674	-0.000978
7675	-0.001136
7676	-0.001044
7677	-0.001047
7678	-0.001221
7679	-0.001251
7680	-0.001224
7681	-0.001311
7682	-0.001233
7683	-0.001145
7684	-0.001137
7685	-0.001242
7686	-0.001238
7687	-0.001185
7688	-0.001191
7689	-0.001165
7690	-0.001197
7691	-0.00117
7692	-0.001182
7693	-0.001172
7694	-0.000957
7695	-0.001032
7696	-0.001095
7697	-0.000984
7698	-0.001004
7699	-0.001058
7700	-0.00099
7701	-0.000996
7702	-0.001072
7703	-0.001104
7704	-0.001121
7705	-0.001027
7706	-0.001017
7707	-0.00108
7708	-0.001189
7709	-0.001137
7710	-0.000999
7711	-0.000987
7712	-0.000927
7713	-0.000941
7714	-0.001149
7715	-0.001165
7716	-0.001064
7717	-0.000931
7718	-0.000957
7719	-0.001036
7720	-0.000928
7721	-0.000828
7722	-0.00082
7723	-0.000948
7724	-0.001038
7725	-0.000971
7726	-0.000937
7727	-0.001023
7728	-0.001212
7729	-0.001354
7730	-0.001284
7731	-0.001215
7732	-0.001077
7733	-0.00087
7734	-0.000895
7735	-0.001039
7736	-0.001063
7737	-0.001032
7738	-0.000975
7739	-0.001047
7740	-0.001009
7741	-0.000875
7742	-0.000911
7743	-0.00102
7744	-0.001108
7745	-0.000994
7746	-0.000826
7747	-0.000826
7748	-0.000856
7749	-0.000939
7750	-0.001082
7751	-0.001166
7752	-0.001092
7753	-0.001097
7754	-0.001148
7755	-0.001303
7756	-0.001314
7757	-0.0012
7758	-0.001165
7759	-0.001204
7760	-0.001124
7761	-0.001162
7762	-0.001274
7763	-0.001334
7764	-0.001243
7765	-0.00116
7766	-0.001095
7767	-0.001056
7768	-0.001017
7769	-0.001043
7770	-0.001025
7771	-0.000825
7772	-0.000787
7773	-0.000902
7774	-0.00095
7775	-0.000934
7776	-0.000885
7777	-0.000849
7778	-0.000888
7779	-0.00086
7780	-0.000898
7781	-0.000791
7782	-0.00081
7783	-0.000857
7784	-0.000826
7785	-0.000726
7786	-0.000506
7787	-0.000548
7788	-0.000731
7789	-0.000829
7790	-0.000983
7791	-0.00095
7792	-0.001027
7793	-0.001141
7794	-0.001223
7795	-0.001035
7796	-0.001047
7797	-0.001204
7798	-0.001187
7799	-0.001167
7800	-0.001122
7801	-0.001067
7802	-0.00096
7803	-0.001014
7804	-0.001064
7805	-0.001099
7806	-0.001021
7807	-0.000976
7808	-0.000997
7809	-0.000867
7810	-0.000761
7811	-0.000721
7812	-0.000785
7813	-0.000916
7814	-0.000986
7815	-0.000968
7816	-0.001107
7817	-0.001103
7818	-0.000948
7819	-0.000866
7820	-0.001054
7821	-0.001116
7822	-0.000994
7823	-0.000847
7824	-0.001028
7825	-0.001157
7826	-0.001111
7827	-0.000961
7828	-0.000906
7829	-0.000846
7830	-0.000924
7831	-0.000975
7832	-0.000944
7833	-0.000913
7834	-0.000921
7835	-0.000926
7836	-0.001042
7837	-0.001117
7838	-0.001069
7839	-0.001078
7840	-0.001196
7841	-0.001294
7842	-0.001365
7843	-0.001218
7844	-0.001103
7845	-0.00106
7846	-0.000993
7847	-0.000976
7848	-0.00097
7849	-0.001002
7850	-0.001061
7851	-0.001148
7852	-0.001241
7853	-0.001371
7854	-0.001367
7855	-0.001225
7856	-0.001243
7857	-0.001309
7858	-0.001251
7859	-0.001235
7860	-0.001265
7861	-0.001294
7862	-0.001169
7863	-0.001101
7864	-0.001148
7865	-0.001221
7866	-0.001276
7867	-0.001308
7868	-0.001185
7869	-0.001265
7870	-0.001358
7871	-0.001279
7872	-0.001345
7873	-0.001403
7874	-0.00143
7875	-0.001372
7876	-0.001417
7877	-0.001567
7878	-0.001699
7879	-0.001796
7880	-0.001755
7881	-0.001694
7882	-0.001596
7883	-0.001498
7884	-0.001424
7885	-0.001552
7886	-0.001522
7887	-0.001408
7888	-0.001453
7889	-0.001456
7890	-0.001338
7891	-0.001233
7892	-0.001249
7893	-0.001344
7894	-0.001408
7895	-0.001375
7896	-0.001286
7897	-0.001237
7898	-0.001306
7899	-0.001378
7900	-0.001408
7901	-0.0013
7902	-0.001175
7903	-0.001253
7904	-0.001315
7905	-0.00131
7906	-0.001339
7907	-0.001376
7908	-0.001162
7909	-0.000996
7910	-0.000983
7911	-0.000952
7912	-0.001023
7913	-0.00103
7914	-0.000999
7915	-0.001118
7916	-0.001275
7917	-0.001301
7918	-0.001205
7919	-0.001101
7920	-0.001117
7921	-0.001208
7922	-0.001397
7923	-0.001434
7924	-0.001319
7925	-0.0011
7926	-0.001077
7927	-0.001097
7928	-0.001152
7929	-0.001239
7930	-0.001264
7931	-0.00124
7932	-0.001197
7933	-0.001192
7934	-0.001157
7935	-0.001062
7936	-0.001133
7937	-0.001237
7938	-0.001255
7939	-0.00118
7940	-0.001218
7941	-0.001354
7942	-0.001345
7943	-0.00121
7944	-0.001107
7945	-0.001125
7946	-0.001223
7947	-0.001209
7948	-0.001166
7949	-0.001159
7950	-0.001277
7951	-0.001247
7952	-0.001258
7953	-0.001149
7954	-0.000952
7955	-0.000927
7956	-0.001027
7957	-0.001126
7958	-0.001085
7959	-0.000973
7960	-0.000974
7961	-0.001096
7962	-0.001157
7963	-0.001245
7964	-0.001436
7965	-0.001502
7966	-0.001429
7967	-0.001373
7968	-0.001208
7969	-0.00109
7970	-0.001194
7971	-0.001146
7972	-0.001091
7973	-0.001113
7974	-0.001155
7975	-0.001193
7976	-0.001245
7977	-0.001215
7978	-0.001177
7979	-0.001189
7980	-0.001241
7981	-0.001163
7982	-0.001134
7983	-0.00118
7984	-0.001301
7985	-0.001271
7986	-0.001253
7987	-0.001345
7988	-0.001239
7989	-0.001176
7990	-0.001187
7991	-0.001213
7992	-0.001221
7993	-0.001106
7994	-0.00114
7995	-0.001152
7996	-0.001093
7997	-0.001015
7998	-0.00109
[truncated: 3,401 more rows]

[truncated: 4 more sheets: 191215 WT_ERRAAA, N359dC (B), N359dC-ERRAAA, Sheet1]
