# Supplementary material for: Homo-oligomerization of the human adenosine A2A receptor is driven by the intrinsically disordered C-terminus
Source: eLife. 2021 Jul 16;10:e66662. doi: 10.7554/eLife.66662 (PMC8328514; doi:10.7554/eLife.66662)
Supplement: Figure 4—source data 1. — (A) Dimer configurations from cluster analysis in GROMACS of the 394-residue variant. (B) Average number of residues that form electrostatic contacts as a function of sequence length of A2AR. (C) Average number of residues that form hydrogen bonds as a function of sequence length of A2AR. [file elife-66662-fig4-data1.xlsx]

## Sheet: Figure 4A
Dimer orientation from cluster analysis
Truncation	Symmetric	Non-symmetric
316	96.27	3.73
334	99.07	0.97
354	98.07	1.93
359	98.7	1.3
394	99.7	0.3

## Sheet: Figure 4B
# of residues in electrostatic interactions
	291-334	335-354	355-359	360-394	Total
316	5.4	0	0	0	5.4
334	7.4	0	0	0	7.4
354	6.5	1.1	0	0	7.6
359	7.1	0.9	1.7	0	9.7
394	10.4	2.3	0.6	2.6	15.9
# of residues in hydrogen bonds
	291-334	335-354	355-359	360-394	Total
316	6	0	0	0	6
334	7	0	0	0	7
354	7.7	2.3	0	0	10
359	9.3	1	0	0	10.3
394	21	1	1	3.7	26.7
