# Supplementary material for: Homo-oligomerization of the human adenosine A2A receptor is driven by the intrinsically disordered C-terminus
Source: eLife. 2021 Jul 16;10:e66662. doi: 10.7554/eLife.66662 (PMC8328514; doi:10.7554/eLife.66662)
Supplement: Figure 5—figure supplement 1—source data 1. [file elife-66662-fig5-figsupp1-data1.xlsx]

## Sheet: WT - SEC 1
Time	UV
6000	-0.026464
6001	-0.026468
6002	-0.026476
6003	-0.026497
6004	-0.026499
6005	-0.026489
6006	-0.026469
6007	-0.026462
6008	-0.026466
6009	-0.02649
6010	-0.026492
6011	-0.026491
6012	-0.026482
6013	-0.026493
6014	-0.026497
6015	-0.026502
6016	-0.026496
6017	-0.02649
6018	-0.026492
6019	-0.026493
6020	-0.026499
6021	-0.0265
6022	-0.026504
6023	-0.026509
6024	-0.026502
6025	-0.026491
6026	-0.026485
6027	-0.026495
6028	-0.026501
6029	-0.02649
6030	-0.026484
6031	-0.026485
6032	-0.026485
6033	-0.026507
6034	-0.026525
6035	-0.026534
6036	-0.02653
6037	-0.026526
6038	-0.02652
6039	-0.026518
6040	-0.026516
6041	-0.026532
6042	-0.02653
6043	-0.026525
6044	-0.026523
6045	-0.026529
6046	-0.026532
6047	-0.026529
6048	-0.026533
6049	-0.026531
6050	-0.026536
6051	-0.026542
6052	-0.026552
6053	-0.026563
6054	-0.026556
6055	-0.026546
6056	-0.026552
6057	-0.026563
6058	-0.026564
6059	-0.026547
6060	-0.026549
6061	-0.026561
6062	-0.026576
6063	-0.026572
6064	-0.026556
6065	-0.026554
6066	-0.02657
6067	-0.026579
6068	-0.026585
6069	-0.026586
6070	-0.026594
6071	-0.026601
6072	-0.026603
6073	-0.026604
6074	-0.026608
6075	-0.0266
6076	-0.026605
6077	-0.026623
6078	-0.026627
6079	-0.026635
6080	-0.026647
6081	-0.026651
6082	-0.026644
6083	-0.026639
6084	-0.026639
6085	-0.026645
6086	-0.026648
6087	-0.026662
6088	-0.026674
6089	-0.026678
6090	-0.026662
6091	-0.026649
6092	-0.026655
6093	-0.026673
6094	-0.026687
6095	-0.026693
6096	-0.026712
6097	-0.026734
6098	-0.026731
6099	-0.02673
6100	-0.026736
6101	-0.026732
6102	-0.026721
6103	-0.026716
6104	-0.026715
6105	-0.026708
6106	-0.026705
6107	-0.026725
6108	-0.026736
6109	-0.026733
6110	-0.026724
6111	-0.026723
6112	-0.026729
6113	-0.026744
6114	-0.02674
6115	-0.026731
6116	-0.026733
6117	-0.026737
6118	-0.026724
6119	-0.026727
6120	-0.026732
6121	-0.026732
6122	-0.026723
6123	-0.026715
6124	-0.026717
6125	-0.026729
6126	-0.026721
6127	-0.026721
6128	-0.026728
6129	-0.026729
6130	-0.026733
6131	-0.026733
6132	-0.026731
6133	-0.026728
6134	-0.026725
6135	-0.026718
6136	-0.026719
6137	-0.026723
6138	-0.026719
6139	-0.026712
6140	-0.02671
6141	-0.026723
6142	-0.026717
6143	-0.026711
6144	-0.026714
6145	-0.02673
6146	-0.026743
6147	-0.026749
6148	-0.026744
6149	-0.026731
6150	-0.02673
6151	-0.026736
6152	-0.02674
6153	-0.026738
6154	-0.026731
6155	-0.026734
6156	-0.026748
6157	-0.026755
6158	-0.026762
6159	-0.02675
6160	-0.026742
6161	-0.026748
6162	-0.026742
6163	-0.026745
6164	-0.026755
6165	-0.026746
6166	-0.026732
6167	-0.02673
6168	-0.026733
6169	-0.026725
6170	-0.026741
6171	-0.026752
6172	-0.02675
6173	-0.02674
6174	-0.026745
6175	-0.026749
6176	-0.026753
6177	-0.026769
6178	-0.026767
6179	-0.026754
6180	-0.026748
6181	-0.026751
6182	-0.026746
6183	-0.026733
6184	-0.026752
6185	-0.026787
6186	-0.026798
6187	-0.026788
6188	-0.026786
6189	-0.026778
6190	-0.026768
6191	-0.026764
6192	-0.026764
6193	-0.02677
6194	-0.026784
6195	-0.02678
6196	-0.026779
6197	-0.02678
6198	-0.026788
6199	-0.026789
6200	-0.026792
6201	-0.026785
6202	-0.026775
6203	-0.026765
6204	-0.026763
6205	-0.026775
6206	-0.026806
6207	-0.026804
6208	-0.026792
6209	-0.026784
6210	-0.026793
6211	-0.026801
6212	-0.026803
6213	-0.0268
6214	-0.02679
6215	-0.026781
6216	-0.026798
6217	-0.0268
6218	-0.026795
6219	-0.026794
6220	-0.026794
6221	-0.026796
6222	-0.026807
6223	-0.026803
6224	-0.026785
6225	-0.026769
6226	-0.026754
6227	-0.02677
6228	-0.026786
6229	-0.026795
6230	-0.026793
6231	-0.026803
6232	-0.026805
6233	-0.0268
6234	-0.026791
6235	-0.026788
6236	-0.026785
6237	-0.026772
6238	0
6239	0
6240	1e-06
6241	3e-06
6242	1.9e-05
6243	3.3e-05
6244	3.9e-05
6245	3.4e-05
6246	2.3e-05
6247	3.2e-05
6248	4.1e-05
6249	4.9e-05
6250	5.1e-05
6251	4.8e-05
6252	4.9e-05
6253	6.5e-05
6254	5.8e-05
6255	5.8e-05
6256	4.6e-05
6257	4.3e-05
6258	2.9e-05
6259	2.1e-05
6260	3.5e-05
6261	4.4e-05
6262	3.9e-05
6263	4.4e-05
6264	4.8e-05
6265	5.1e-05
6266	3.8e-05
6267	3.6e-05
6268	2.5e-05
6269	1e-05
6270	5e-06
6271	1.3e-05
6272	2.6e-05
6273	1.9e-05
6274	2.7e-05
6275	2.8e-05
6276	2.7e-05
6277	2.1e-05
6278	3.6e-05
6279	3.5e-05
6280	3.9e-05
6281	4e-05
6282	4.1e-05
6283	2.7e-05
6284	2.2e-05
6285	2.7e-05
6286	3.9e-05
6287	4.5e-05
6288	5e-05
6289	5.7e-05
6290	6.3e-05
6291	5.4e-05
6292	5e-05
6293	6.4e-05
6294	6.3e-05
6295	4.9e-05
6296	4.2e-05
6297	3.7e-05
6298	5.2e-05
6299	6.4e-05
6300	8.2e-05
6301	9.4e-05
6302	0.000105
6303	0.000134
6304	0.000168
6305	0.000193
6306	0.000217
6307	0.00022
6308	0.000246
6309	0.000299
6310	0.000366
6311	0.000452
6312	0.000552
6313	0.000674
6314	0.000782
6315	0.00089
6316	0.000984
6317	0.001079
6318	0.001161
6319	0.001244
6320	0.001316
6321	0.001369
6322	0.001429
6323	0.001482
6324	0.00155
6325	0.001616
6326	0.00166
6327	0.001705
6328	0.001755
6329	0.001802
6330	0.001846
6331	0.001882
6332	0.001902
6333	0.001926
6334	0.001942
6335	0.001944
6336	0.001953
6337	0.001947
6338	0.001951
6339	0.001955
6340	0.001953
6341	0.001938
6342	0.001914
6343	0.001894
6344	0.001878
6345	0.001865
6346	0.00185
6347	0.001811
6348	0.001761
6349	0.001726
6350	0.001703
6351	0.001702
6352	0.001687
6353	0.001663
6354	0.001631
6355	0.001607
6356	0.001572
6357	0.001542
6358	0.001504
6359	0.001483
6360	0.001463
6361	0.001456
6362	0.001436
6363	0.001405
6364	0.001382
6365	0.001355
6366	0.001327
6367	0.001303
6368	0.001285
6369	0.001264
6370	0.001239
6371	0.001235
6372	0.001229
6373	0.001207
6374	0.00121
6375	0.0012
6376	0.001162
6377	0.001162
6378	0.001175
6379	0.001162
6380	0.001135
6381	0.001121
6382	0.001104
6383	0.001086
6384	0.001072
6385	0.001067
6386	0.001068
6387	0.001063
6388	0.001055
6389	0.001053
6390	0.001042
6391	0.00102
6392	0.000989
6393	0.000947
6394	0.000908
6395	0.000877
6396	0.000841
6397	0.000814
6398	0.000796
6399	0.000785
6400	0.000779
6401	0.000777
6402	0.000766
6403	0.000763
6404	0.000772
6405	0.000788
6406	0.000786
6407	0.000783
6408	0.000767
6409	0.00076
6410	0.000753
6411	0.000752
6412	0.000741
6413	0.00074
6414	0.000739
6415	0.000736
6416	0.000719
6417	0.000702
6418	0.000686
6419	0.000672
6420	0.000643
6421	0.000634
6422	0.000637
6423	0.000637
6424	0.00063
6425	0.000624
6426	0.000627
6427	0.000618
6428	0.000594
6429	0.000578
6430	0.000582
6431	0.000595
6432	0.000597
6433	0.000591
6434	0.000577
6435	0.000573
6436	0.000563
6437	0.000561
6438	0.00055
6439	0.000544
6440	0.000537
6441	0.000531
6442	0.000543
6443	0.00054
6444	0.000523
6445	0.000507
6446	0.000489
6447	0.000494
6448	0.000496
6449	0.000486
6450	0.000475
6451	0.000462
6452	0.000456
6453	0.000461
6454	0.000449
6455	0.000442
6456	0.00044
6457	0.00045
6458	0.000441
6459	0.00042
6460	0.000404
6461	0.000389
6462	0.000376
6463	0.000376
6464	0.000369
6465	0.000359
6466	0.000351
6467	0.000338
6468	0.00034
6469	0.000339
6470	0.000353
6471	0.000353
6472	0.000331
6473	0.000316
6474	0.000315
6475	0.00032
6476	0.000322
6477	0.000327
6478	0.00033
6479	0.000324
6480	0.000324
6481	0.000314
6482	0.000313
6483	0.000299
6484	0.000292
6485	0.000275
6486	0.000281
6487	0.000284
6488	0.000276
6489	0.000277
6490	0.000286
6491	0.000301
6492	0.000308
6493	0.0003
6494	0.000286
6495	0.000287
6496	0.000283
6497	0.000277
6498	0.000276
6499	0.000278
6500	0.000284
6501	0.000297
6502	0.000311
6503	0.000301
6504	0.000292
6505	0.000285
6506	0.000285
6507	0.00027
6508	0.000266
6509	0.000277
6510	0.000278
6511	0.000277
6512	0.000277
6513	0.000273
6514	0.000264
6515	0.000267
6516	0.000277
6517	0.000293
6518	0.000282
6519	0.000287
6520	0.000287
6521	0.000289
6522	0.000284
6523	0.000284
6524	0.00029
6525	0.000289
6526	0.000296
6527	0.000314
6528	0.000307
6529	0.000299
6530	0.000289
6531	0.000287
6532	0.000299
6533	0.000295
6534	0.000296
6535	0.000306
6536	0.000302
6537	0.000292
6538	0.000302
6539	0.000309
6540	0.000294
6541	0.000275
6542	0.000275
6543	0.000278
6544	0.000296
6545	0.000296
6546	0.000305
6547	0.000307
6548	0.000305
6549	0.000301
6550	0.000289
6551	0.000266
6552	0.000267
6553	0.000281
6554	0.000298
6555	0.000305
6556	0.000294
6557	0.000293
6558	0.000295
6559	0.00031
6560	0.000299
6561	0.000299
6562	0.000294
6563	0.00029
6564	0.000282
6565	0.000279
6566	0.000297
6567	0.000314
6568	0.000323
6569	0.000321
6570	0.000319
6571	0.000322
6572	0.000334
6573	0.000332
6574	0.000344
6575	0.00036
6576	0.000366
6577	0.000366
6578	0.00036
6579	0.000355
6580	0.000362
6581	0.000358
6582	0.000339
6583	0.000336
6584	0.000341
6585	0.00034
6586	0.00033
6587	0.000321
6588	0.000318
6589	0.00033
6590	0.000343
6591	0.00037
6592	0.000374
6593	0.000365
6594	0.00037
6595	0.000377
6596	0.00037
6597	0.000374
6598	0.000369
6599	0.000377
6600	0.00038
6601	0.000376
6602	0.000375
6603	0.000373
6604	0.000365
6605	0.000366
6606	0.000358
6607	0.000363
6608	0.000351
6609	0.000343
6610	0.000348
6611	0.000348
6612	0.000342
6613	0.000351
6614	0.000368
6615	0.000363
6616	0.000356
6617	0.000356
6618	0.000369
6619	0.000366
6620	0.000359
6621	0.000375
6622	0.000379
6623	0.000363
6624	0.000356
6625	0.000368
6626	0.000376
6627	0.000374
6628	0.000366
6629	0.000373
6630	0.000372
6631	0.00037
6632	0.000356
6633	0.000361
6634	0.000366
6635	0.000357
6636	0.000345
6637	0.000363
6638	0.000377
6639	0.000386
6640	0.000379
6641	0.000372
6642	0.000392
6643	0.000397
6644	0.000391
6645	0.000403
6646	0.000417
6647	0.000411
6648	0.000407
6649	0.000428
6650	0.000446
6651	0.000435
6652	0.000422
6653	0.000422
6654	0.000418
6655	0.000424
6656	0.000418
6657	0.000401
6658	0.000403
6659	0.000408
6660	0.000415
6661	0.000419
6662	0.000423
6663	0.000424
6664	0.000414
6665	0.000414
6666	0.000424
6667	0.000423
6668	0.000431
6669	0.000427
6670	0.000443
6671	0.000458
6672	0.000453
6673	0.000449
6674	0.000436
6675	0.000418
6676	0.000416
6677	0.000422
6678	0.000431
6679	0.000436
6680	0.00044
6681	0.000445
6682	0.000452
6683	0.000444
6684	0.000423
6685	0.000434
6686	0.000456
6687	0.000459
6688	0.00045
6689	0.000447
6690	0.000457
6691	0.000477
6692	0.000484
6693	0.000473
6694	0.000463
6695	0.000478
6696	0.000471
6697	0.000462
6698	0.000467
6699	0.000472
6700	0.000472
6701	0.000459
6702	0.000465
6703	0.000468
6704	0.000471
6705	0.000471
6706	0.000473
6707	0.00046
6708	0.000462
6709	0.000459
6710	0.000466
6711	0.000471
6712	0.00048
6713	0.00048
6714	0.00048
6715	0.000489
6716	0.000501
6717	0.000489
6718	0.000469
6719	0.000458
6720	0.000465
6721	0.000463
6722	0.000462
6723	0.000478
6724	0.00048
6725	0.00046
6726	0.000448
6727	0.000454
6728	0.000461
6729	0.000468
6730	0.000469
6731	0.000472
6732	0.000463
6733	0.000461
6734	0.000462
6735	0.000474
6736	0.000467
6737	0.000456
6738	0.00045
6739	0.000448
6740	0.000449
6741	0.000435
6742	0.000435
6743	0.000436
6744	0.000425
6745	0.000423
6746	0.000419
6747	0.000421
6748	0.000425
6749	0.000419
6750	0.000416
6751	0.000409
6752	0.000404
6753	0.000397
6754	0.000389
6755	0.000397
6756	0.000404
6757	0.000413
6758	0.000418
6759	0.000419
6760	0.00042
6761	0.000412
6762	0.000419
6763	0.000431
6764	0.000442
6765	0.000449
6766	0.000453
6767	0.000448
6768	0.000453
6769	0.000439
6770	0.000426
6771	0.000417
6772	0.000414
6773	0.000426
6774	0.000421
6775	0.000422
6776	0.000426
6777	0.000446
6778	0.000446
6779	0.000431
6780	0.000411
6781	0.000414
6782	0.000428
6783	0.000434
6784	0.000427
6785	0.000424
6786	0.00043
6787	0.00043
6788	0.000422
6789	0.000413
6790	0.00041
6791	0.000423
6792	0.000418
6793	0.000437
6794	0.000445
6795	0.000423
6796	0.000412
6797	0.000427
6798	0.000439
6799	0.000429
6800	0.000434
6801	0.000412
6802	0.000417
6803	0.000423
6804	0.000432
6805	0.00042
6806	0.000413
6807	0.000416
6808	0.000432
6809	0.000431
6810	0.000418
6811	0.000417
6812	0.000427
6813	0.000434
6814	0.000425
6815	0.000429
6816	0.000434
6817	0.000432
6818	0.00042
6819	0.000426
6820	0.00043
6821	0.00043
6822	0.00042
6823	0.000415
6824	0.000414
6825	0.000419
6826	0.000418
6827	0.000411
6828	0.000391
6829	0.000389
6830	0.000386
6831	0.000401
6832	0.000407
6833	0.000403
6834	0.0004
6835	0.000408
6836	0.000412
6837	0.000394
6838	0.000386
6839	0.000392
6840	0.000407
6841	0.000404
6842	0.000416
6843	0.000433
6844	0.000431
6845	0.000419
6846	0.000415
6847	0.000406
6848	0.000403
6849	0.000391
6850	0.000404
6851	0.000414
6852	0.00042
6853	0.000412
6854	0.000398
6855	0.000378
6856	0.000374
6857	0.000386
6858	0.000387
6859	0.000388
6860	0.000379
6861	0.000382
6862	0.000374
6863	0.000364
6864	0.000349
6865	0.000338
6866	0.000352
6867	0.000373
6868	0.000383
6869	0.000384
6870	0.000378
6871	0.00037
6872	0.000365
6873	0.000368
6874	0.000375
6875	0.000381
6876	0.000391
6877	0.000387
6878	0.000386
6879	0.000386
6880	0.000371
6881	0.00036
6882	0.000363
6883	0.000367
6884	0.000358
6885	0.000356
6886	0.000354
6887	0.000376
6888	0.000371
6889	0.000358
6890	0.000353
6891	0.000357
6892	0.000355
6893	0.000354
6894	0.000358
6895	0.000359
6896	0.000364
6897	0.000358
6898	0.000357
6899	0.000344
6900	0.000329
6901	0.000343
6902	0.000352
6903	0.000346
6904	0.000354
6905	0.000353
6906	0.000341
6907	0.00033
6908	0.000322
6909	0.000311
6910	0.000324
6911	0.000341
6912	0.000348
6913	0.000344
6914	0.000351
6915	0.000353
6916	0.00035
6917	0.00035
6918	0.000372
6919	0.00038
6920	0.000361
6921	0.000348
6922	0.000352
6923	0.000362
6924	0.000347
6925	0.000338
6926	0.000343
6927	0.000359
6928	0.000361
6929	0.000354
6930	0.000348
6931	0.000352
6932	0.000376
6933	0.000383
6934	0.000363
6935	0.000368
6936	0.000379
6937	0.000398
6938	0.000407
6939	0.000408
6940	0.000408
6941	0.000422
6942	0.00043
6943	0.000432
6944	0.000432
6945	0.000442
6946	0.000429
6947	0.000442
6948	0.000448
6949	0.000454
6950	0.000452
6951	0.000427
6952	0.000416
6953	0.000425
6954	0.000444
6955	0.000442
6956	0.000445
6957	0.000452
6958	0.000452
6959	0.000455
6960	0.000455
6961	0.00048
6962	0.00049
6963	0.000473
6964	0.000476
6965	0.000485
6966	0.000488
6967	0.000492
6968	0.000509
6969	0.000526
6970	0.000532
6971	0.000509
6972	0.000485
6973	0.000484
6974	0.000494
6975	0.000486
6976	0.000484
6977	0.000493
6978	0.000492
6979	0.000493
6980	0.000489
6981	0.00048
6982	0.000459
6983	0.000472
6984	0.000499
6985	0.000497
6986	0.000488
6987	0.00048
6988	0.000468
6989	0.00046
6990	0.000462
6991	0.000465
6992	0.000455
6993	0.000448
6994	0.000448
6995	0.000469
6996	0.000458
6997	0.000456
6998	0.000446
6999	0.00045
7000	0.000467
7001	0.000483
7002	0.000479
7003	0.000471
7004	0.000468
7005	0.000455
7006	0.000449
7007	0.000461
7008	0.000461
7009	0.000466
7010	0.000463
7011	0.000468
7012	0.000469
7013	0.000463
7014	0.000466
7015	0.000466
7016	0.000464
7017	0.000466
7018	0.000464
7019	0.000455
7020	0.000446
7021	0.000446
7022	0.000454
7023	0.000453
7024	0.000453
7025	0.000458
7026	0.000467
7027	0.000454
7028	0.000443
7029	0.00043
7030	0.000427
7031	0.000426
7032	0.000434
7033	0.000447
7034	0.000462
7035	0.000473
7036	0.000464
7037	0.000462
7038	0.000458
7039	0.000445
7040	0.000432
7041	0.000429
7042	0.000423
7043	0.000425
7044	0.000435
7045	0.000436
7046	0.000435
7047	0.000434
7048	0.000422
7049	0.000431
7050	0.000443
7051	0.000447
7052	0.000429
7053	0.000418
7054	0.000418
7055	0.000419
7056	0.000404
7057	0.000406
7058	0.000399
7059	0.000408
7060	0.000408
7061	0.000414
7062	0.000414
7063	0.000402
7064	0.000393
7065	0.00041
7066	0.000427
7067	0.000423
7068	0.000419
7069	0.000424
7070	0.000433
7071	0.000432
7072	0.000429
7073	0.000418
7074	0.000429
7075	0.000429
7076	0.000416
7077	0.000415
7078	0.000428
7079	0.000444
7080	0.000448
7081	0.000447
7082	0.00044
7083	0.000444
7084	0.000457
7085	0.000446
7086	0.000435
7087	0.000446
7088	0.000466
7089	0.000472
7090	0.000468
7091	0.00047
7092	0.000475
7093	0.000476
7094	0.000467
7095	0.000472
7096	0.000478
7097	0.000474
7098	0.000462
7099	0.000442
7100	0.000423
7101	0.000424
7102	0.000426
7103	0.000429
7104	0.00043
7105	0.000429
7106	0.000421
7107	0.000432
7108	0.000439
7109	0.000448
7110	0.000444
7111	0.000442
7112	0.000437
7113	0.000433
7114	0.00043
7115	0.000422
7116	0.000413
7117	0.000423
7118	0.000446
7119	0.000442
7120	0.000433
7121	0.000409
7122	0.000393
7123	0.000404
7124	0.000413
7125	0.0004
7126	0.000401
7127	0.000419
7128	0.00043
7129	0.000432
7130	0.000436
7131	0.000436
7132	0.00044
7133	0.000445
7134	0.000453
7135	0.000463
7136	0.000455
7137	0.000456
7138	0.000466
7139	0.000478
7140	0.000476
7141	0.000469
7142	0.000462
7143	0.000469
7144	0.000459
7145	0.000444
7146	0.000439
7147	0.00044
7148	0.000445
7149	0.000452
7150	0.000451
7151	0.000463
7152	0.000475
7153	0.000487
7154	0.000491
7155	0.000481
7156	0.000488
7157	0.000486
7158	0.000479
7159	0.00047
7160	0.000484
7161	0.00048
7162	0.000475
7163	0.00048
7164	0.000498
7165	0.000496
7166	0.000484
7167	0.000476
7168	0.000472
7169	0.000476
7170	0.000481
7171	0.000485
7172	0.000478
7173	0.000473
7174	0.000481
7175	0.000473
7176	0.000468
7177	0.000476
7178	0.00048
7179	0.000488
7180	0.000485
7181	0.000482
7182	0.000472
7183	0.000469
7184	0.000474
7185	0.000474
7186	0.00047
7187	0.000479
7188	0.000478
7189	0.000459
7190	0.000454
7191	0.000471
7192	0.000474
7193	0.00048
7194	0.000477
7195	0.000483
7196	0.000491
7197	0.000494
7198	0.000494
7199	0.0005
7200	0.000488
7201	0.000474
7202	0.000474
7203	0.000481
7204	0.000482
7205	0.000469
7206	0.000447
7207	0.000437
7208	0.000454
7209	0.000471
7210	0.000477
7211	0.000469
7212	0.000475
7213	0.000479
7214	0.000464
7215	0.000438
7216	0.000415
7217	0.00043
7218	0.000456
7219	0.000464
7220	0.000461
7221	0.000445
7222	0.000431
7223	0.000427
7224	0.000427
7225	0.00044
7226	0.000437
7227	0.000438
7228	0.000444
7229	0.000448
7230	0.000454
7231	0.000441
7232	0.000442
7233	0.000444
7234	0.000452
7235	0.000451
7236	0.000446
7237	0.000452
7238	0.000447
7239	0.000442
7240	0.000441
7241	0.000453
7242	0.000448
7243	0.000437
7244	0.000422
7245	0.000433
7246	0.000442
7247	0.000441
7248	0.000441
7249	0.000437
7250	0.000414
7251	0.000416
7252	0.000418
7253	0.000419
7254	0.000416
7255	0.000415
7256	0.000418
7257	0.000439
7258	0.000439
7259	0.000446
7260	0.000434
7261	0.000434
7262	0.000425
7263	0.000425
7264	0.000424
7265	0.000428
7266	0.00044
7267	0.000455
7268	0.000463
7269	0.000453
7270	0.00044
7271	0.000431
7272	0.00042
7273	0.000425
7274	0.000433
7275	0.000431
7276	0.000417
7277	0.000414
7278	0.000412
7279	0.000412
7280	0.000409
7281	0.000404
7282	0.000402
7283	0.000413
7284	0.000416
7285	0.000403
7286	0.000401
7287	0.000417
7288	0.000415
7289	0.000422
7290	0.000412
7291	0.000405
7292	0.00041
7293	0.00042
7294	0.000408
7295	0.000397
7296	0.000402
7297	0.00041
7298	0.000407
7299	0.000405
7300	0.000414
7301	0.000409
7302	0.000397
7303	0.000379
7304	0.000379
7305	0.000379
7306	0.00038
7307	0.000379
7308	0.000375
7309	0.00037
7310	0.000373
7311	0.000369
7312	0.000362
7313	0.000373
7314	0.000382
7315	0.000378
7316	0.000372
7317	0.000362
7318	0.00036
7319	0.000367
7320	0.000382
7321	0.000372
7322	0.000371
7323	0.000387
7324	0.000401
7325	0.000413
7326	0.000418
7327	0.00042
7328	0.00042
7329	0.000415
7330	0.000417
7331	0.000411
7332	0.000412
7333	0.000415
7334	0.000416
7335	0.000423
7336	0.000421
7337	0.00042
7338	0.000417
7339	0.00042
7340	0.000439
7341	0.000454
7342	0.00044
7343	0.000428
7344	0.000429
7345	0.000433
7346	0.00043
7347	0.000435
7348	0.000454
7349	0.000467
7350	0.00046
7351	0.000452
7352	0.000463
7353	0.000463
7354	0.00046
7355	0.000447
7356	0.000445
7357	0.000462
7358	0.000467
7359	0.00047
7360	0.000468
7361	0.000457
7362	0.000465
7363	0.000469
7364	0.000471
7365	0.000466
7366	0.000457
7367	0.000441
7368	0.000447
7369	0.000445
7370	0.000432
7371	0.000434
7372	0.000433
7373	0.000442
7374	0.000445
7375	0.000441
7376	0.000441
7377	0.000431
7378	0.000428
7379	0.000418
7380	0.000415
7381	0.000413
7382	0.000413
7383	0.000432
7384	0.000437
7385	0.000448
7386	0.000439
7387	0.000414
7388	0.000408
7389	0.00042
7390	0.000428
7391	0.000424
7392	0.000417
7393	0.00041
7394	0.000413
7395	0.000406
7396	0.000392
7397	0.000381
7398	0.000388
7399	0.000387
7400	0.00039
7401	0.000384
7402	0.000376
7403	0.000382
7404	0.000379
7405	0.00038
7406	0.000378
7407	0.000387
7408	0.000393
7409	0.000407
7410	0.000417
7411	0.000407
7412	0.000388
7413	0.000404
7414	0.000416
7415	0.000402
7416	0.000394
7417	0.000395
7418	0.00039
7419	0.000391
7420	0.00039
7421	0.000382
7422	0.000373
7423	0.000384
7424	0.000369
7425	0.000352
7426	0.000353
7427	0.000357
7428	0.000359
7429	0.000367
7430	0.000367
7431	0.000376
7432	0.000377
7433	0.000371
7434	0.00036
7435	0.000357
7436	0.000368
7437	0.000389
7438	0.000398
7439	0.000389
7440	0.000373
7441	0.00036
7442	0.000352
7443	0.000355
7444	0.000349
7445	0.00035
7446	0.000348
7447	0.000355
7448	0.000354
7449	0.000346
7450	0.000339
7451	0.000331
7452	0.000324
7453	0.000324
7454	0.000335
7455	0.000332
7456	0.000332
7457	0.000326
7458	0.000335
7459	0.000348
7460	0.000364
7461	0.000354
7462	0.000328
7463	0.000317
7464	0.000324
7465	0.000327
7466	0.000323
7467	0.000311
7468	0.000306
7469	0.0003
7470	0.0003
7471	0.000305
7472	0.000304
7473	0.000303
7474	0.000295
7475	0.000294
7476	0.000285
7477	0.00028
7478	0.000279
7479	0.000289
7480	0.000292
7481	0.000294
7482	0.000286
7483	0.000288
7484	0.000301
7485	0.000325
7486	0.000321
7487	0.000296
7488	0.000281
7489	0.000288
7490	0.000289
7491	0.000292
7492	0.000293
7493	0.000298
7494	0.000302
7495	0.000298
7496	0.000297
7497	0.000303
7498	0.000302
7499	0.000307
7500	0.000308
7501	0.000308
7502	0.000313
7503	0.000323
7504	0.00032
7505	0.000325
7506	0.000335
7507	0.000332
7508	0.000346
7509	0.000358
7510	0.00036
7511	0.000362
7512	0.000361
7513	0.000358
7514	0.000361
7515	0.000363
7516	0.000364
7517	0.000365
7518	0.000371
7519	0.000369
7520	0.000367
7521	0.00036
7522	0.000359
7523	0.000368
7524	0.000359
7525	0.000353
7526	0.000357
7527	0.00037
7528	0.000381
7529	0.000381
7530	0.00039
7531	0.000389
7532	0.00039
7533	0.000387
7534	0.000389
7535	0.000371
7536	0.000379
7537	0.000382
7538	0.000375
7539	0.000375
7540	0.000379
7541	0.000386
7542	0.000381
7543	0.000374
7544	0.000373
7545	0.000381
7546	0.000393
7547	0.000386
7548	0.000389
7549	0.000374
7550	0.000365
7551	0.000356
7552	0.000365
7553	0.000392
7554	0.000388
7555	0.000375
7556	0.000371
7557	0.000374
7558	0.000386
7559	0.000371
7560	0.000363
7561	0.000358
7562	0.00035
7563	0.000344
7564	0.000347
7565	0.000356
7566	0.000352
7567	0.000333
7568	0.000343
7569	0.000367
7570	0.00036
7571	0.000363
7572	0.000362
7573	0.000351
7574	0.000353
7575	0.000357
7576	0.000347
7577	0.000361
7578	0.000374
7579	0.000368
7580	0.000359
7581	0.000353
7582	0.000357
7583	0.000352
7584	0.000359
7585	0.000352
7586	0.000349
7587	0.000343
7588	0.000336
7589	0.000316
7590	0.000315
7591	0.000311
7592	0.000311
7593	0.000315
7594	0.000319
7595	0.000309
7596	0.000311
7597	0.000314
7598	0.000305
7599	0.000301
7600	0.000309
7601	0.000315
7602	0.000323
7603	0.000321
7604	0.000316
7605	0.000299
7606	0.000294
7607	0.000291
7608	0.000298
7609	0.000305
7610	0.000301
7611	0.000282
7612	0.000272
7613	0.000278
7614	0.000286
7615	0.000286
7616	0.000274
7617	0.000272
7618	0.000273
7619	0.000275
7620	0.000272
7621	0.000281
7622	0.00027
7623	0.000259
7624	0.000251
7625	0.000245
7626	0.000232
7627	0.00023
7628	0.00024
7629	0.000251
7630	0.00026
7631	0.000267
7632	0.000267
7633	0.000261
7634	0.00026
7635	0.000263
7636	0.000268
7637	0.000274
7638	0.000282
7639	0.000294
7640	0.000306
7641	0.000305
7642	0.000299
7643	0.000294
7644	0.000301
7645	0.000305
7646	0.000292
7647	0.000282
7648	0.000289
7649	0.000294
7650	0.000291
7651	0.000279
7652	0.000274
7653	0.000276
7654	0.000282
7655	0.000291
7656	0.000297
7657	0.000284
7658	0.000267
7659	0.000268
7660	0.000275
7661	0.000279
7662	0.000287
7663	0.000293
7664	0.000302
7665	0.000297
7666	0.000284
7667	0.000272
7668	0.000273
7669	0.00028
7670	0.000277
7671	0.000275
7672	0.000263
7673	0.00026
7674	0.000247
7675	0.000246
7676	0.000252
7677	0.000256
7678	0.000256
7679	0.00025
7680	0.000244
7681	0.000247
7682	0.000252
7683	0.000272
7684	0.000273
7685	0.000274
7686	0.000269
7687	0.000263
7688	0.000251
7689	0.000267
7690	0.00027
7691	0.000267
7692	0.000274
7693	0.000274
7694	0.000279
7695	0.000281
7696	0.000297
7697	0.000306
7698	0.000302
7699	0.000298
7700	0.000286
7701	0.000289
7702	0.000292
7703	0.000297
7704	0.000284
7705	0.000274
7706	0.000275
7707	0.000267
7708	0.000285
7709	0.000305
7710	0.000311
7711	0.000292
7712	0.000289
7713	0.000285
7714	0.0003
7715	0.000303
7716	0.000302
7717	0.000299
7718	0.000302
7719	0.000321
7720	0.000318
7721	0.000301
7722	0.000295
7723	0.000304
7724	0.000311
7725	0.000308
7726	0.000306
7727	0.000304
7728	0.000298
7729	0.000299
7730	0.00031
7731	0.000318
7732	0.00032
7733	0.000304
7734	0.000312
7735	0.000311
7736	0.000297
7737	0.000265
7738	0.00025
7739	0.000258
7740	0.000264
7741	0.000277
7742	0.000283
7743	0.000289
7744	0.000288
7745	0.000295
7746	0.000307
7747	0.000301
7748	0.000294
7749	0.000286
7750	0.000288
7751	0.000301
7752	0.000322
7753	0.000298
7754	0.000274
7755	0.000278
7756	0.000297
7757	0.000294
7758	0.000287
7759	0.000282
7760	0.000272
7761	0.000263
7762	0.000252
7763	0.000244
7764	0.000251
7765	0.000253
7766	0.000254
7767	0.000261
7768	0.000267
7769	0.000272
7770	0.000271
7771	0.000275
7772	0.000282
7773	0.000268
7774	0.000253
7775	0.000238
7776	0.000242
7777	0.00025
7778	0.000256
7779	0.000256
7780	0.00025
7781	0.00024
7782	0.000243
7783	0.000267
7784	0.000264
7785	0.000253
7786	0.00025
7787	0.000258
7788	0.000271
7789	0.00028
7790	0.000288
7791	0.000277
7792	0.000261
7793	0.000242
7794	0.000256
7795	0.000271
7796	0.00027
7797	0.000247
7798	0.000242
7799	0.000249
7800	0.000249
7801	0.000247
7802	0.000232
7803	0.00022
7804	0.00023
7805	0.000236
7806	0.000231
7807	0.000236
7808	0.000241
7809	0.000232
7810	0.000232
7811	0.000234
7812	0.000231
7813	0.000239
7814	0.000251
7815	0.000254
7816	0.000253
7817	0.000233
7818	0.000228
7819	0.000235
7820	0.000229
7821	0.00024
7822	0.000232
7823	0.00024
7824	0.000245
7825	0.000242
7826	0.000244
7827	0.00025
7828	0.000249
7829	0.000233
7830	0.000235
7831	0.00025
7832	0.000254
7833	0.000255
7834	0.000258
7835	0.00026
7836	0.000266
7837	0.000275
7838	0.000268
7839	0.000245
7840	0.000237
7841	0.000238
7842	0.000237
7843	0.000252
7844	0.000261
7845	0.000253
7846	0.000252
7847	0.000235
7848	0.000227
7849	0.000229
7850	0.000244
7851	0.000263
7852	0.000274
7853	0.000267
7854	0.000268
7855	0.00028
7856	0.000284
7857	0.000277
7858	0.000272
7859	0.000271
7860	0.000286
7861	0.000292
7862	0.000281
7863	0.000272
7864	0.000274
7865	0.000288
7866	0.000294
7867	0.000293
7868	0.000289
7869	0.000287
7870	0.000288
7871	0.000296
7872	0.000303
7873	0.000315
7874	0.000316
7875	0.00031
7876	0.00031
7877	0.000319
7878	0.000337
7879	0.000349
7880	0.00035
7881	0.000347
7882	0.000337
7883	0.000339
7884	0.000336
7885	0.000329
7886	0.000317
7887	0.000304
7888	0.000312
7889	0.000311
7890	0.000302
7891	0.00028
7892	0.000266
7893	0.000279
7894	0.000287
7895	0.000299
7896	0.000303
7897	0.000303
7898	0.000299
7899	0.000316
7900	0.000325
7901	0.00032
7902	0.000318
7903	0.000318
7904	0.000326
7905	0.000341
7906	0.000343
7907	0.000334
7908	0.000325
7909	0.000309
7910	0.000295
7911	0.000296
7912	0.000288
7913	0.00028
7914	0.000282
7915	0.000309
7916	0.000312
7917	0.000312
7918	0.000318
7919	0.000319
7920	0.000307
7921	0.000322
7922	0.000334
7923	0.000321
7924	0.000313
7925	0.000336
7926	0.000342
7927	0.000331
7928	0.000339
7929	0.000345
7930	0.000345
7931	0.000342
7932	0.000346
7933	0.000358
7934	0.000363
7935	0.000358
7936	0.00037
7937	0.000372
7938	0.000367
7939	0.000364
7940	0.000357
7941	0.000359
7942	0.000366
7943	0.000379
7944	0.000376
7945	0.000364
7946	0.000376
7947	0.000405
7948	0.00041
7949	0.00041
7950	0.000412
7951	0.000423
7952	0.000412
7953	0.000398
7954	0.000388
7955	0.000386
7956	0.000391
7957	0.000395
7958	0.000404
7959	0.000405
7960	0.0004
7961	0.0004
7962	0.000394
7963	0.000401
7964	0.000401
7965	0.000404
7966	0.000404
7967	0.000412
7968	0.000425
7969	0.000425
7970	0.000421
7971	0.000433
7972	0.000443
7973	0.000436
7974	0.000434
7975	0.000424
7976	0.000416
7977	0.000423
7978	0.000424
7979	0.000418
7980	0.000409
7981	0.000405
7982	0.000396
7983	0.0004
7984	0.00042
7985	0.000431
7986	0.000431
7987	0.000417
7988	0.000425
7989	0.00044
7990	0.000454
7991	0.000457
7992	0.00046
7993	0.000471
7994	0.000471
7995	0.000477
7996	0.000474
7997	0.000465
7998	0.000464
[truncated: 4,001 more rows]

## Sheet: WT - dimer oligomer - SEC 2
Time	UV
6000	-0.014029
6001	-0.014016
6002	-0.014016
6003	-0.014026
6004	-0.014021
6005	-0.014015
6006	-0.01402
6007	-0.01402
6008	-0.01402
6009	-0.014025
6010	-0.014022
6011	-0.01403
6012	-0.01403
6013	-0.01403
6014	-0.014023
6015	-0.014029
6016	-0.014033
6017	-0.014038
6018	-0.014047
6019	-0.014044
6020	-0.014053
6021	-0.014066
6022	-0.014064
6023	-0.014047
6024	-0.014035
6025	-0.014035
6026	-0.014053
6027	-0.014061
6028	-0.014067
6029	-0.014065
6030	-0.014063
6031	-0.014075
6032	-0.014077
6033	-0.014076
6034	-0.014071
6035	-0.01408
6036	-0.014089
6037	-0.014089
6038	-0.014078
6039	-0.014064
6040	-0.01405
6041	-0.014057
6042	-0.014076
6043	-0.014089
6044	-0.014093
6045	-0.014088
6046	-0.014082
6047	-0.014092
6048	-0.014092
6049	-0.014086
6050	-0.014088
6051	-0.014076
6052	-0.014066
6053	-0.014067
6054	-0.014087
6055	-0.014094
6056	-0.014104
6057	-0.014103
6058	-0.01411
6059	-0.014115
6060	-0.014103
6061	-0.014089
6062	-0.014082
6063	-0.014088
6064	-0.014105
6065	-0.014111
6066	-0.014119
6067	-0.014092
6068	-0.014079
6069	-0.014089
6070	-0.014102
6071	-0.014112
6072	-0.014103
6073	-0.014097
6074	-0.014089
6075	-0.014075
6076	-0.014073
6077	-0.014078
6078	-0.014083
6079	-0.014089
6080	-0.0141
6081	-0.014089
6082	-0.014085
6083	-0.014075
6084	-0.014075
6085	-0.014077
6086	-0.01409
6087	-0.014097
6088	-0.0141
6089	-0.014088
6090	-0.014083
6091	-0.014097
6092	-0.014101
6093	-0.014095
6094	-0.014111
6095	-0.014113
6096	-0.014096
6097	-0.014086
6098	-0.014092
6099	-0.014107
6100	-0.014115
6101	-0.014107
6102	-0.014094
6103	-0.014098
6104	-0.01411
6105	-0.014114
6106	-0.014117
6107	-0.014101
6108	-0.014093
6109	-0.014093
6110	-0.014098
6111	-0.014104
6112	-0.014098
6113	-0.014089
6114	-0.014092
6115	-0.014092
6116	-0.014095
6117	-0.014099
6118	-0.014095
6119	-0.014084
6120	-0.014079
6121	-0.014091
6122	-0.014103
6123	-0.014108
6124	-0.014101
6125	-0.014082
6126	-0.014074
6127	-0.014072
6128	-0.01408
6129	-0.014086
6130	-0.014083
6131	-0.014072
6132	-0.014074
6133	-0.014081
6134	-0.014082
6135	-0.01408
6136	-0.014067
6137	-0.014061
6138	-0.014057
6139	-0.014079
6140	-0.014081
6141	-0.014076
6142	-0.01407
6143	-0.014062
6144	-0.014064
6145	-0.014067
6146	-0.014069
6147	-0.014073
6148	-0.014084
6149	-0.014093
6150	-0.014075
6151	-0.014063
6152	-0.014048
6153	-0.014039
6154	-0.014052
6155	-0.014056
6156	-0.014062
6157	-0.014068
6158	-0.014072
6159	-0.014061
6160	-0.014072
6161	-0.014094
6162	-0.014097
6163	-0.014089
6164	-0.014079
6165	-0.014083
6166	-0.01408
6167	-0.014073
6168	-0.014069
6169	-0.014073
6170	-0.014072
6171	-0.014077
6172	-0.014093
6173	-0.014087
6174	-0.014075
6175	-0.014087
6176	-0.014094
6177	-0.014097
6178	-0.014094
6179	-0.014081
6180	-0.01407
6181	-0.014083
6182	-0.014092
6183	-0.014095
6184	-0.014087
6185	-0.014096
6186	-0.014099
6187	-0.014105
6188	-0.014096
6189	-0.014095
6190	-0.014099
6191	-0.014108
6192	-0.014096
6193	-0.014084
6194	-0.01408
6195	-0.014085
6196	-0.014079
6197	-0.014078
6198	-0.014089
6199	-0.014093
6200	-0.014082
6201	-0.01408
6202	-0.014081
6203	-0.014073
6204	-0.014059
6205	-0.014069
6206	-0.014084
6207	-0.014088
6208	-0.014088
6209	-0.014089
6210	-0.014087
6211	-0.014084
6212	-0.014082
6213	-0.014089
6214	-0.014086
6215	-0.014093
6216	-0.0141
6217	-0.014113
6218	-0.014107
6219	-0.014095
6220	-0.014098
6221	-0.014104
6222	-0.0141
6223	-0.014101
6224	-0.014108
6225	-0.014101
6226	-0.014104
6227	-0.014102
6228	-0.014102
6229	-0.014107
6230	-0.014114
6231	-0.014112
6232	-0.014103
6233	-0.014094
6234	-0.014104
6235	-0.014111
6236	-0.014107
6237	0
6238	0
6239	1e-06
6240	-3e-06
6241	-6e-06
6242	3e-06
6243	1e-05
6244	2.4e-05
6245	2.8e-05
6246	2.3e-05
6247	1.8e-05
6248	3.1e-05
6249	3e-05
6250	2.7e-05
6251	5e-06
6252	8e-06
6253	0
6254	4e-06
6255	1.2e-05
6256	2.2e-05
6257	2.4e-05
6258	2.4e-05
6259	3.6e-05
6260	1.5e-05
6261	-1.8e-05
6262	-3e-05
6263	-1.2e-05
6264	-1.1e-05
6265	-1.9e-05
6266	-1.9e-05
6267	-1.3e-05
6268	-1.7e-05
6269	-2.9e-05
6270	-2.2e-05
6271	-1.7e-05
6272	-8e-06
6273	-1e-06
6274	-9e-06
6275	-2.3e-05
6276	-2.9e-05
6277	-4e-05
6278	-4.1e-05
6279	-3.3e-05
6280	-1.9e-05
6281	-1.8e-05
6282	-4e-05
6283	-4.3e-05
6284	-3.3e-05
6285	-2.4e-05
6286	-1.9e-05
6287	-7e-06
6288	1.3e-05
6289	3e-05
6290	7.3e-05
6291	0.000141
6292	0.000194
6293	0.000226
6294	0.000253
6295	0.000308
6296	0.000403
6297	0.000558
6298	0.000746
6299	0.000942
6300	0.001131
6301	0.001297
6302	0.001437
6303	0.001575
6304	0.001711
6305	0.001844
6306	0.001957
6307	0.002064
6308	0.002166
6309	0.002278
6310	0.002391
6311	0.002497
6312	0.002587
6313	0.002671
6314	0.002747
6315	0.002806
6316	0.002836
6317	0.002847
6318	0.002855
6319	0.002852
6320	0.002846
6321	0.002822
6322	0.002791
6323	0.002759
6324	0.002712
6325	0.002682
6326	0.002652
6327	0.00261
6328	0.002562
6329	0.002522
6330	0.002472
6331	0.00242
6332	0.002352
6333	0.002271
6334	0.002193
6335	0.002116
6336	0.002052
6337	0.001984
6338	0.00192
6339	0.001863
6340	0.001811
6341	0.001755
6342	0.0017
6343	0.00165
6344	0.001588
6345	0.001542
6346	0.001502
6347	0.001485
6348	0.001451
6349	0.001428
6350	0.001407
6351	0.001388
6352	0.00134
6353	0.001305
6354	0.001298
6355	0.001288
6356	0.001267
6357	0.001249
6358	0.001227
6359	0.001208
6360	0.001196
6361	0.001174
6362	0.001152
6363	0.00114
6364	0.001141
6365	0.001134
6366	0.001133
6367	0.001132
6368	0.001121
6369	0.001104
6370	0.001102
6371	0.001113
6372	0.001105
6373	0.001093
6374	0.001094
6375	0.0011
6376	0.001103
6377	0.001102
6378	0.00111
6379	0.001124
6380	0.001136
6381	0.001138
6382	0.001142
6383	0.001143
6384	0.001136
6385	0.001116
6386	0.00112
6387	0.001132
6388	0.001127
6389	0.001096
6390	0.001075
6391	0.001053
6392	0.001037
6393	0.001026
6394	0.001
6395	0.000963
6396	0.000918
6397	0.000907
6398	0.000907
6399	0.000893
6400	0.000873
6401	0.000858
6402	0.000845
6403	0.000844
6404	0.00084
6405	0.000842
6406	0.000823
6407	0.000813
6408	0.000813
6409	0.000812
6410	0.000815
6411	0.000823
6412	0.000815
6413	0.000802
6414	0.000809
6415	0.000822
6416	0.000799
6417	0.000771
6418	0.000763
6419	0.000765
6420	0.000777
6421	0.000773
6422	0.000763
6423	0.000743
6424	0.000736
6425	0.000734
6426	0.000752
6427	0.000755
6428	0.000746
6429	0.000739
6430	0.000733
6431	0.000712
6432	0.000702
6433	0.000713
6434	0.000711
6435	0.000698
6436	0.0007
6437	0.00072
6438	0.000717
6439	0.000694
6440	0.000701
6441	0.0007
6442	0.000689
6443	0.000687
6444	0.000686
6445	0.000684
6446	0.000678
6447	0.000676
6448	0.000666
6449	0.000657
6450	0.000661
6451	0.000661
6452	0.00066
6453	0.000654
6454	0.000644
6455	0.000645
6456	0.00064
6457	0.000624
6458	0.000613
6459	0.000601
6460	0.000598
6461	0.000608
6462	0.000595
6463	0.000583
6464	0.000573
6465	0.000561
6466	0.000577
6467	0.000603
6468	0.000607
6469	0.000603
6470	0.000597
6471	0.000595
6472	0.000598
6473	0.000594
6474	0.000596
6475	0.000588
6476	0.000576
6477	0.000576
6478	0.000583
6479	0.000581
6480	0.000578
6481	0.000566
6482	0.000561
6483	0.000567
6484	0.000568
6485	0.000554
6486	0.000556
6487	0.000578
6488	0.000579
6489	0.000564
6490	0.000568
6491	0.000568
6492	0.000566
6493	0.000573
6494	0.000575
6495	0.000568
6496	0.000556
6497	0.000554
6498	0.000554
6499	0.000561
6500	0.000564
6501	0.000564
6502	0.000559
6503	0.000559
6504	0.000571
6505	0.000578
6506	0.000563
6507	0.000561
6508	0.00058
6509	0.000592
6510	0.000596
6511	0.000577
6512	0.000569
6513	0.000561
6514	0.000575
6515	0.000592
6516	0.000588
6517	0.000583
6518	0.000592
6519	0.000602
6520	0.000604
6521	0.0006
6522	0.000607
6523	0.000589
6524	0.000587
6525	0.000584
6526	0.000582
6527	0.000607
6528	0.000621
6529	0.000618
6530	0.000613
6531	0.000609
6532	0.000605
6533	0.000608
6534	0.000601
6535	0.000616
6536	0.000628
6537	0.000611
6538	0.000602
6539	0.000622
6540	0.000635
6541	0.000641
6542	0.00065
6543	0.000658
6544	0.000641
6545	0.000629
6546	0.000639
6547	0.000661
6548	0.00067
6549	0.000668
6550	0.000665
6551	0.000671
6552	0.000669
6553	0.000661
6554	0.000669
6555	0.000667
6556	0.000666
6557	0.000667
6558	0.000666
6559	0.000664
6560	0.000659
6561	0.000666
6562	0.000678
6563	0.000688
6564	0.000674
6565	0.000679
6566	0.000687
6567	0.000688
6568	0.000692
6569	0.00069
6570	0.000691
6571	0.000699
6572	0.000711
6573	0.000705
6574	0.000709
6575	0.000715
6576	0.00072
6577	0.000714
6578	0.000702
6579	0.000704
6580	0.000707
6581	0.000706
6582	0.000712
6583	0.00072
6584	0.000715
6585	0.000702
6586	0.0007
6587	0.000693
6588	0.000681
6589	0.000676
6590	0.000682
6591	0.000685
6592	0.000677
6593	0.000673
6594	0.000682
6595	0.000688
6596	0.000685
6597	0.000677
6598	0.000666
6599	0.000671
6600	0.000682
6601	0.00067
6602	0.000663
6603	0.000665
6604	0.000671
6605	0.000668
6606	0.000666
6607	0.000647
6608	0.000637
6609	0.000637
6610	0.000653
6611	0.000654
6612	0.000658
6613	0.000665
6614	0.000662
6615	0.000647
6616	0.000631
6617	0.000637
6618	0.000644
6619	0.000636
6620	0.000654
6621	0.000666
6622	0.000652
6623	0.000627
6624	0.000626
6625	0.00063
6626	0.000631
6627	0.00063
6628	0.000617
6629	0.000601
6630	0.000606
6631	0.000631
6632	0.000645
6633	0.000638
6634	0.000615
6635	0.000607
6636	0.000609
6637	0.000618
6638	0.00063
6639	0.000636
6640	0.000635
6641	0.000627
6642	0.000602
6643	0.000596
6644	0.000602
6645	0.000599
6646	0.000598
6647	0.000589
6648	0.000591
6649	0.000589
6650	0.000569
6651	0.000558
6652	0.000552
6653	0.000551
6654	0.000547
6655	0.000545
6656	0.000542
6657	0.000544
6658	0.000562
6659	0.000561
6660	0.000546
6661	0.000546
6662	0.000537
6663	0.00054
6664	0.000529
6665	0.000524
6666	0.000533
6667	0.000536
6668	0.000525
6669	0.000521
6670	0.000533
6671	0.000527
6672	0.000514
6673	0.000512
6674	0.000506
6675	0.000483
6676	0.00048
6677	0.000494
6678	0.000502
6679	0.000499
6680	0.000486
6681	0.000496
6682	0.000502
6683	0.000486
6684	0.000473
6685	0.000472
6686	0.00047
6687	0.000469
6688	0.000475
6689	0.000492
6690	0.000501
6691	0.00049
6692	0.000485
6693	0.000491
6694	0.000486
6695	0.000475
6696	0.000471
6697	0.000456
6698	0.000447
6699	0.000458
6700	0.000465
6701	0.000469
6702	0.000478
6703	0.000479
6704	0.000473
6705	0.000462
6706	0.000467
6707	0.000467
6708	0.000461
6709	0.000466
6710	0.000487
6711	0.000494
6712	0.000499
6713	0.000499
6714	0.000483
6715	0.000477
6716	0.000483
6717	0.000495
6718	0.000507
6719	0.000504
6720	0.000512
6721	0.00053
6722	0.000529
6723	0.00051
6724	0.000514
6725	0.000525
6726	0.000531
6727	0.000533
6728	0.000541
6729	0.000534
6730	0.000529
6731	0.000535
6732	0.00055
6733	0.000559
6734	0.000564
6735	0.000569
6736	0.000573
6737	0.000572
6738	0.000561
6739	0.000552
6740	0.000549
6741	0.00055
6742	0.000548
6743	0.000553
6744	0.000568
6745	0.000572
6746	0.000577
6747	0.000572
6748	0.000574
6749	0.000579
6750	0.00058
6751	0.000574
6752	0.000576
6753	0.000589
6754	0.000583
6755	0.000576
6756	0.000569
6757	0.000569
6758	0.000566
6759	0.000566
6760	0.000574
6761	0.000571
6762	0.000577
6763	0.000587
6764	0.000591
6765	0.000582
6766	0.000574
6767	0.000561
6768	0.000572
6769	0.000586
6770	0.000583
6771	0.000591
6772	0.000595
6773	0.000593
6774	0.000583
6775	0.000601
6776	0.00061
6777	0.000606
6778	0.000598
6779	0.000598
6780	0.000613
6781	0.000603
6782	0.000592
6783	0.00058
6784	0.00058
6785	0.000574
6786	0.000572
6787	0.000568
6788	0.000577
6789	0.000586
6790	0.000579
6791	0.000569
6792	0.000571
6793	0.000567
6794	0.000558
6795	0.000561
6796	0.000572
6797	0.000586
6798	0.000577
6799	0.000569
6800	0.000567
6801	0.000561
6802	0.000564
6803	0.000566
6804	0.000563
6805	0.000555
6806	0.000551
6807	0.000549
6808	0.000542
6809	0.000537
6810	0.000531
6811	0.000539
6812	0.000545
6813	0.000544
6814	0.000539
6815	0.000523
6816	0.000525
6817	0.000531
6818	0.000535
6819	0.000543
6820	0.000541
6821	0.000536
6822	0.000554
6823	0.000554
6824	0.00054
6825	0.000532
6826	0.000538
6827	0.000553
6828	0.000557
6829	0.000547
6830	0.000536
6831	0.00054
6832	0.000539
6833	0.000532
6834	0.000524
6835	0.000519
6836	0.000531
6837	0.000544
6838	0.000548
6839	0.000548
6840	0.000559
6841	0.000569
6842	0.000566
6843	0.000563
6844	0.000564
6845	0.000544
6846	0.00053
6847	0.000527
6848	0.000526
6849	0.000521
6850	0.000519
6851	0.000529
6852	0.000536
6853	0.000553
6854	0.000552
6855	0.000547
6856	0.000538
6857	0.000529
6858	0.000533
6859	0.000544
6860	0.000551
6861	0.000556
6862	0.00057
6863	0.000568
6864	0.000559
6865	0.000541
6866	0.000529
6867	0.000525
6868	0.000526
6869	0.000515
6870	0.000539
6871	0.000562
6872	0.000569
6873	0.000597
6874	0.000605
6875	0.000586
6876	0.000585
6877	0.000597
6878	0.000598
6879	0.000595
6880	0.000604
6881	0.000616
6882	0.000619
6883	0.000621
6884	0.000626
6885	0.00063
6886	0.00062
6887	0.000638
6888	0.000653
6889	0.000647
6890	0.000651
6891	0.000666
6892	0.000657
6893	0.000652
6894	0.000651
6895	0.000652
6896	0.000652
6897	0.000657
6898	0.000658
6899	0.000661
6900	0.00066
6901	0.000655
6902	0.000653
6903	0.000665
6904	0.000673
6905	0.000668
6906	0.00067
6907	0.000673
6908	0.000673
6909	0.000675
6910	0.000674
6911	0.000675
6912	0.000691
6913	0.000689
6914	0.000671
6915	0.000671
6916	0.000684
6917	0.000689
6918	0.000674
6919	0.000674
6920	0.000676
6921	0.000665
6922	0.000659
6923	0.000661
6924	0.000671
6925	0.000669
6926	0.000667
6927	0.000678
6928	0.000685
6929	0.000688
6930	0.000696
6931	0.000696
6932	0.000689
6933	0.00068
6934	0.000678
6935	0.00068
6936	0.000693
6937	0.000694
6938	0.000686
6939	0.000687
6940	0.000688
6941	0.000681
6942	0.000684
6943	0.00068
6944	0.000679
6945	0.000672
6946	0.000663
6947	0.000651
6948	0.000638
6949	0.000637
6950	0.000637
6951	0.000646
6952	0.000638
6953	0.000643
6954	0.000648
6955	0.000653
6956	0.000645
6957	0.000638
6958	0.000636
6959	0.00063
6960	0.000634
6961	0.000643
6962	0.000638
6963	0.00062
6964	0.000616
6965	0.000632
6966	0.000637
6967	0.000627
6968	0.00062
6969	0.000597
6970	0.000588
6971	0.000596
6972	0.000606
6973	0.000586
6974	0.000568
6975	0.000554
6976	0.000547
6977	0.000547
6978	0.000551
6979	0.00055
6980	0.000548
6981	0.000547
6982	0.000553
6983	0.000547
6984	0.00053
6985	0.000525
6986	0.000532
6987	0.00054
6988	0.000541
6989	0.000536
6990	0.000538
6991	0.000522
6992	0.000517
6993	0.000515
6994	0.00051
6995	0.000509
6996	0.000515
6997	0.000522
6998	0.000524
6999	0.000523
7000	0.000518
7001	0.000522
7002	0.00052
7003	0.000522
7004	0.000519
7005	0.00051
7006	0.000503
7007	0.000498
7008	0.000513
7009	0.000522
7010	0.000528
7011	0.00053
7012	0.000532
7013	0.000527
7014	0.000516
7015	0.000519
7016	0.000528
7017	0.00053
7018	0.000525
7019	0.000537
7020	0.000549
7021	0.00054
7022	0.000529
7023	0.00051
7024	0.000499
7025	0.000503
7026	0.000502
7027	0.000523
7028	0.000541
7029	0.000542
7030	0.000541
7031	0.000537
7032	0.000542
7033	0.000547
7034	0.000546
7035	0.000547
7036	0.000544
7037	0.000541
7038	0.000547
7039	0.000551
7040	0.000554
7041	0.000554
7042	0.000552
7043	0.000534
7044	0.000537
7045	0.000546
7046	0.000557
7047	0.000558
7048	0.000556
7049	0.00056
7050	0.000568
7051	0.000565
7052	0.000581
7053	0.000598
7054	0.000593
7055	0.000585
7056	0.000585
7057	0.000595
7058	0.000608
7059	0.000603
7060	0.000599
7061	0.000599
7062	0.000616
7063	0.000628
7064	0.000621
7065	0.000622
7066	0.000626
7067	0.000634
7068	0.000638
7069	0.000618
7070	0.000609
7071	0.000629
7072	0.000655
7073	0.000656
7074	0.000657
7075	0.000647
7076	0.000633
7077	0.000639
7078	0.000651
7079	0.000657
7080	0.000652
7081	0.000655
7082	0.000664
7083	0.000676
7084	0.00066
7085	0.000645
7086	0.000647
7087	0.000668
7088	0.000661
7089	0.00064
7090	0.000644
7091	0.00065
7092	0.000644
7093	0.00064
7094	0.000656
7095	0.000663
7096	0.000672
7097	0.000674
7098	0.000658
7099	0.000652
7100	0.000663
7101	0.000669
7102	0.000662
7103	0.000655
7104	0.000665
7105	0.000657
7106	0.000674
7107	0.000675
7108	0.000664
7109	0.000659
7110	0.000675
7111	0.000677
7112	0.000678
7113	0.000676
7114	0.000669
7115	0.000653
7116	0.000648
7117	0.000654
7118	0.000643
7119	0.000619
7120	0.000605
7121	0.000606
7122	0.000614
7123	0.000616
7124	0.00062
7125	0.000616
7126	0.000618
7127	0.000612
7128	0.000607
7129	0.000607
7130	0.000603
7131	0.000621
7132	0.000626
7133	0.000613
7134	0.000613
7135	0.000621
7136	0.000616
7137	0.000594
7138	0.000588
7139	0.000593
7140	0.000608
7141	0.000598
7142	0.000578
7143	0.000574
7144	0.000565
7145	0.000569
7146	0.000576
7147	0.00059
7148	0.000596
7149	0.00058
7150	0.000561
7151	0.000554
7152	0.000544
7153	0.000555
7154	0.000557
7155	0.000551
7156	0.00055
7157	0.000538
7158	0.000524
7159	0.000529
7160	0.000532
7161	0.000529
7162	0.000528
7163	0.000527
7164	0.000533
7165	0.000547
7166	0.000551
7167	0.000553
7168	0.000565
7169	0.000557
7170	0.000546
7171	0.000543
7172	0.00055
7173	0.000529
7174	0.000515
7175	0.000523
7176	0.000516
7177	0.000512
7178	0.000525
7179	0.000534
7180	0.000531
7181	0.000516
7182	0.000512
7183	0.000509
7184	0.000508
7185	0.000509
7186	0.000498
7187	0.000492
7188	0.00049
7189	0.000484
7190	0.000482
7191	0.000495
7192	0.000501
7193	0.000496
7194	0.000492
7195	0.000501
7196	0.000506
7197	0.000497
7198	0.000486
7199	0.000493
7200	0.0005
7201	0.000505
7202	0.000519
7203	0.000531
7204	0.000504
7205	0.000497
7206	0.000503
7207	0.000508
7208	0.00051
7209	0.000513
7210	0.000516
7211	0.000508
7212	0.000484
7213	0.000482
7214	0.000492
7215	0.000493
7216	0.000489
7217	0.000491
7218	0.000495
7219	0.00049
7220	0.000485
7221	0.000491
7222	0.000509
7223	0.000522
7224	0.000538
7225	0.000524
7226	0.000512
7227	0.000522
7228	0.000538
7229	0.000528
7230	0.00052
7231	0.000518
7232	0.000519
7233	0.000526
7234	0.000518
7235	0.000521
7236	0.000524
7237	0.000526
7238	0.000528
7239	0.000533
7240	0.00053
7241	0.000534
7242	0.00053
7243	0.000532
7244	0.000539
7245	0.000555
7246	0.000567
7247	0.000566
7248	0.00056
7249	0.000562
7250	0.000583
7251	0.000611
7252	0.000617
7253	0.000627
7254	0.000619
7255	0.000615
7256	0.000608
7257	0.000611
7258	0.000618
7259	0.000609
7260	0.000611
7261	0.000612
7262	0.000612
7263	0.000608
7264	0.00061
7265	0.000624
7266	0.000623
7267	0.000625
7268	0.000619
7269	0.000613
7270	0.000613
7271	0.00062
7272	0.000631
7273	0.000627
7274	0.00064
7275	0.000654
7276	0.000644
7277	0.000624
7278	0.000623
7279	0.000621
7280	0.000626
7281	0.00063
7282	0.000633
7283	0.000624
7284	0.000627
7285	0.000635
7286	0.000621
7287	0.000627
7288	0.000637
7289	0.000644
7290	0.00063
7291	0.00063
7292	0.000629
7293	0.000619
7294	0.000623
7295	0.00062
7296	0.000617
7297	0.000616
7298	0.000608
7299	0.000612
7300	0.000617
7301	0.000619
7302	0.000619
7303	0.000615
7304	0.000616
7305	0.000617
7306	0.000614
7307	0.000605
7308	0.00061
7309	0.000616
7310	0.000623
7311	0.000627
7312	0.000634
7313	0.000636
7314	0.000634
7315	0.000619
7316	0.00061
7317	0.000615
7318	0.000607
7319	0.00061
7320	0.000617
7321	0.000615
7322	0.000608
7323	0.000601
7324	0.00059
7325	0.000581
7326	0.000572
7327	0.000567
7328	0.000578
7329	0.000583
7330	0.000573
7331	0.000556
7332	0.00056
7333	0.000552
7334	0.000546
7335	0.000541
7336	0.000535
7337	0.00054
7338	0.000547
7339	0.000562
7340	0.000555
7341	0.00054
7342	0.000532
7343	0.000543
7344	0.000552
7345	0.00055
7346	0.000538
7347	0.000536
7348	0.000532
7349	0.000536
7350	0.000543
7351	0.000539
7352	0.000513
7353	0.000498
7354	0.000497
7355	0.000497
7356	0.000499
7357	0.00049
7358	0.000482
7359	0.000486
7360	0.000488
7361	0.000501
7362	0.0005
7363	0.000498
7364	0.000496
7365	0.000492
7366	0.000495
7367	0.000483
7368	0.000478
7369	0.000485
7370	0.0005
7371	0.000504
7372	0.000515
7373	0.000511
7374	0.000504
7375	0.000498
7376	0.000492
7377	0.000499
7378	0.000491
7379	0.000485
7380	0.000477
7381	0.000474
7382	0.000468
7383	0.000459
7384	0.000455
7385	0.000461
7386	0.00047
7387	0.000481
7388	0.000489
7389	0.000501
7390	0.00051
7391	0.000497
7392	0.000501
7393	0.000498
7394	0.000492
7395	0.00049
7396	0.000498
7397	0.000498
7398	0.000506
7399	0.000517
7400	0.000501
7401	0.000485
7402	0.000501
7403	0.000512
7404	0.000505
7405	0.000486
7406	0.000478
7407	0.000482
7408	0.000501
7409	0.000503
7410	0.00048
7411	0.000468
7412	0.000489
7413	0.000513
7414	0.000525
7415	0.000522
7416	0.000512
7417	0.00051
7418	0.000499
7419	0.000504
7420	0.000503
7421	0.000512
7422	0.000532
7423	0.000524
7424	0.000529
7425	0.000542
7426	0.000552
7427	0.000549
7428	0.000547
7429	0.000547
7430	0.000547
7431	0.000543
7432	0.000554
7433	0.000553
7434	0.000546
7435	0.000545
7436	0.000551
7437	0.000556
7438	0.00055
7439	0.000547
7440	0.00056
7441	0.000547
7442	0.000542
7443	0.000551
7444	0.000557
7445	0.000563
7446	0.000586
7447	0.000595
7448	0.000585
7449	0.000576
7450	0.000578
7451	0.000577
7452	0.000573
7453	0.000574
7454	0.00059
7455	0.000586
7456	0.000589
7457	0.000589
7458	0.000579
7459	0.000575
7460	0.000578
7461	0.000579
7462	0.000575
7463	0.000588
7464	0.000601
7465	0.00061
7466	0.000617
7467	0.000615
7468	0.000604
7469	0.000603
7470	0.00062
7471	0.00062
7472	0.000618
7473	0.000603
7474	0.000595
7475	0.000596
7476	0.000606
7477	0.000603
7478	0.000601
7479	0.000611
7480	0.00062
7481	0.000612
7482	0.000619
7483	0.00061
7484	0.000597
7485	0.000588
7486	0.000596
7487	0.000591
7488	0.000605
7489	0.00061
7490	0.000609
7491	0.000613
7492	0.000606
7493	0.000593
7494	0.00059
7495	0.000612
7496	0.000608
7497	0.000595
7498	0.000589
7499	0.000591
7500	0.000596
7501	0.000576
7502	0.000565
7503	0.000561
7504	0.000568
7505	0.000577
7506	0.000573
7507	0.000553
7508	0.000552
7509	0.000557
7510	0.000579
7511	0.00058
7512	0.000575
7513	0.000564
7514	0.000563
7515	0.000571
7516	0.000554
7517	0.000541
7518	0.000544
7519	0.000554
7520	0.000558
7521	0.000557
7522	0.000542
7523	0.000531
7524	0.000528
7525	0.000518
7526	0.000529
7527	0.000528
7528	0.000521
7529	0.000501
7530	0.000508
7531	0.000518
7532	0.00053
7533	0.000518
7534	0.000515
7535	0.000516
7536	0.000513
7537	0.000505
7538	0.000468
7539	0.000456
7540	0.00047
7541	0.000479
7542	0.000466
7543	0.000458
7544	0.00046
7545	0.000464
7546	0.000458
7547	0.000458
7548	0.000457
7549	0.000465
7550	0.00046
7551	0.000459
7552	0.000452
7553	0.000436
7554	0.000433
7555	0.000428
7556	0.000424
7557	0.000416
7558	0.000418
7559	0.000414
7560	0.000409
7561	0.000414
7562	0.000433
7563	0.000446
7564	0.000443
7565	0.000421
7566	0.000408
7567	0.000403
7568	0.000401
7569	0.000407
7570	0.000407
7571	0.000404
7572	0.000407
7573	0.000412
7574	0.000411
7575	0.000396
7576	0.000396
7577	0.000395
7578	0.000383
7579	0.000395
7580	0.000395
7581	0.000383
7582	0.000377
7583	0.000385
7584	0.000398
7585	0.000401
7586	0.000401
7587	0.000396
7588	0.000408
7589	0.000405
7590	0.000403
7591	0.00039
7592	0.000387
7593	0.000396
7594	0.000418
7595	0.000416
7596	0.000388
7597	0.000367
7598	0.000373
7599	0.000376
7600	0.000373
7601	0.000384
7602	0.000382
7603	0.000383
7604	0.000391
7605	0.000397
7606	0.000393
7607	0.000382
7608	0.000383
7609	0.000374
7610	0.000365
7611	0.000369
7612	0.000369
7613	0.000369
7614	0.00037
7615	0.00038
7616	0.000398
7617	0.000402
7618	0.000399
7619	0.000392
7620	0.000396
7621	0.000395
7622	0.000392
7623	0.000386
7624	0.000391
7625	0.000414
7626	0.000428
7627	0.000425
7628	0.000411
7629	0.000409
7630	0.0004
7631	0.000412
7632	0.000417
7633	0.000402
7634	0.000393
7635	0.000413
7636	0.000431
7637	0.000455
7638	0.000456
7639	0.000433
7640	0.000418
7641	0.000422
7642	0.000448
7643	0.000453
7644	0.000453
7645	0.000452
7646	0.000451
7647	0.000445
7648	0.00044
7649	0.000449
7650	0.000456
7651	0.000447
7652	0.000446
7653	0.000442
7654	0.000438
7655	0.000432
7656	0.00043
7657	0.000428
7658	0.000438
7659	0.000446
7660	0.000455
7661	0.000447
7662	0.00043
7663	0.000437
7664	0.000451
7665	0.000447
7666	0.00044
7667	0.000429
7668	0.000432
7669	0.000441
7670	0.00045
7671	0.000443
7672	0.000435
7673	0.00043
7674	0.000431
7675	0.000428
7676	0.000423
7677	0.000412
7678	0.000415
7679	0.000418
7680	0.000422
7681	0.000422
7682	0.000421
7683	0.000429
7684	0.000441
7685	0.000443
7686	0.000428
7687	0.00042
7688	0.000416
7689	0.000411
7690	0.000397
7691	0.000393
7692	0.000394
7693	0.000404
7694	0.000405
7695	0.000415
7696	0.000411
7697	0.000395
7698	0.000384
7699	0.000388
7700	0.000398
7701	0.000397
7702	0.0004
7703	0.000412
7704	0.000402
7705	0.000398
7706	0.000401
7707	0.000388
7708	0.000368
7709	0.000366
7710	0.000366
7711	0.000367
7712	0.000373
7713	0.000378
7714	0.000384
7715	0.000383
7716	0.000377
7717	0.000378
7718	0.000379
7719	0.000393
7720	0.000401
7721	0.000388
7722	0.000388
7723	0.000386
7724	0.000365
7725	0.000361
7726	0.000375
7727	0.00039
7728	0.000384
7729	0.000363
7730	0.00036
7731	0.000375
7732	0.000383
7733	0.000375
7734	0.000382
7735	0.00038
7736	0.000366
7737	0.000353
7738	0.000363
7739	0.000367
7740	0.000365
7741	0.000371
7742	0.000372
7743	0.000359
7744	0.00035
7745	0.000356
7746	0.000359
7747	0.00036
7748	0.000353
7749	0.000358
7750	0.000353
7751	0.000356
7752	0.000368
7753	0.000365
7754	0.000358
7755	0.000362
7756	0.000363
7757	0.000358
7758	0.00035
7759	0.000352
7760	0.00036
7761	0.00036
7762	0.000362
7763	0.000363
7764	0.000365
7765	0.000364
7766	0.000373
7767	0.000381
7768	0.000375
7769	0.000369
7770	0.000365
7771	0.000354
7772	0.000349
7773	0.000362
7774	0.000382
7775	0.000392
7776	0.000381
7777	0.000374
7778	0.000364
7779	0.000358
7780	0.000363
7781	0.000378
7782	0.000381
7783	0.000376
7784	0.000371
7785	0.000376
7786	0.000388
7787	0.000397
7788	0.000404
7789	0.000392
7790	0.000386
7791	0.0004
7792	0.000414
7793	0.000411
7794	0.000404
7795	0.000409
7796	0.000428
7797	0.000444
7798	0.000449
7799	0.000445
7800	0.000431
7801	0.000412
7802	0.000409
7803	0.000428
7804	0.000451
7805	0.00046
7806	0.000452
7807	0.000445
7808	0.00046
7809	0.000462
7810	0.00047
7811	0.00047
7812	0.000466
7813	0.00047
7814	0.000475
7815	0.000472
7816	0.000481
7817	0.000486
7818	0.000484
7819	0.000474
7820	0.000465
7821	0.000456
7822	0.00046
7823	0.00048
7824	0.000487
7825	0.000495
7826	0.000497
7827	0.00049
7828	0.000475
7829	0.000487
7830	0.000491
7831	0.00049
7832	0.000491
7833	0.000486
7834	0.000496
7835	0.000498
7836	0.00049
7837	0.000487
7838	0.000487
7839	0.000487
7840	0.000481
7841	0.000487
7842	0.000477
7843	0.000482
7844	0.000474
7845	0.000466
7846	0.000472
7847	0.000478
7848	0.00048
7849	0.000472
7850	0.000462
7851	0.000463
7852	0.000476
7853	0.000486
7854	0.000495
7855	0.000491
7856	0.000485
7857	0.000463
7858	0.000441
7859	0.000437
7860	0.00046
7861	0.000463
7862	0.000447
7863	0.000445
7864	0.000442
7865	0.00044
7866	0.000454
7867	0.000459
7868	0.00046
7869	0.000445
7870	0.00044
7871	0.00044
7872	0.000437
7873	0.000435
7874	0.000446
7875	0.000433
7876	0.000423
7877	0.000422
7878	0.000439
7879	0.00043
7880	0.000414
7881	0.000418
7882	0.000412
7883	0.000398
7884	0.000398
7885	0.000401
7886	0.000404
7887	0.000399
7888	0.000401
7889	0.000396
7890	0.00039
7891	0.000398
7892	0.000403
7893	0.000404
7894	0.000395
7895	0.000385
7896	0.000393
7897	0.000396
7898	0.000396
7899	0.000379
7900	0.000377
7901	0.000374
7902	0.000383
7903	0.000379
7904	0.000373
7905	0.000357
7906	0.000356
7907	0.000372
7908	0.000369
7909	0.000366
7910	0.00036
7911	0.000351
7912	0.000349
7913	0.000351
7914	0.000352
7915	0.000352
7916	0.000346
7917	0.000339
7918	0.00034
7919	0.000346
7920	0.000343
7921	0.000325
7922	0.000316
7923	0.000321
7924	0.000326
7925	0.000327
7926	0.000322
7927	0.000297
7928	0.000294
7929	0.000304
7930	0.000309
7931	0.000304
7932	0.000306
7933	0.000324
7934	0.000319
7935	0.00032
7936	0.00032
7937	0.000327
7938	0.000321
7939	0.000319
7940	0.000326
7941	0.000334
7942	0.000327
7943	0.000326
7944	0.000342
7945	0.000346
7946	0.00034
7947	0.000341
7948	0.000351
7949	0.000346
7950	0.000364
7951	0.000362
7952	0.000368
7953	0.000363
7954	0.000366
7955	0.00037
7956	0.000393
7957	0.000417
7958	0.000419
7959	0.000401
7960	0.000402
7961	0.000398
7962	0.000404
7963	0.00041
7964	0.000423
7965	0.000433
7966	0.000444
7967	0.000448
7968	0.000448
7969	0.000448
7970	0.000457
7971	0.000474
7972	0.000479
7973	0.000478
7974	0.000489
7975	0.00051
7976	0.000514
7977	0.000514
7978	0.000512
7979	0.000514
7980	0.000518
7981	0.000522
7982	0.000535
7983	0.000554
7984	0.000576
7985	0.000568
7986	0.000568
7987	0.000586
7988	0.000588
7989	0.000583
7990	0.000592
7991	0.000601
7992	0.000602
7993	0.000623
7994	0.000639
7995	0.000635
7996	0.000629
7997	0.000628
7998	0.000635
[truncated: 2,987 more rows]

## Sheet: WT - monomer - SEC 2
Time	UV
6000	-0.016001
6001	-0.015991
6002	-0.015988
6003	-0.015977
6004	-0.01597
6005	-0.015965
6006	-0.015971
6007	-0.015966
6008	-0.015964
6009	-0.015973
6010	-0.015979
6011	-0.015965
6012	-0.015948
6013	-0.015937
6014	-0.015946
6015	-0.015945
6016	-0.01593
6017	-0.01592
6018	-0.01594
6019	-0.01595
6020	-0.015937
6021	-0.015924
6022	-0.015924
6023	-0.015917
6024	-0.015927
6025	-0.015931
6026	-0.015928
6027	-0.015912
6028	-0.015916
6029	-0.015924
6030	-0.015928
6031	-0.015927
6032	-0.015926
6033	-0.015925
6034	-0.015933
6035	-0.015924
6036	-0.01591
6037	-0.015897
6038	-0.015884
6039	-0.01587
6040	-0.015871
6041	-0.015872
6042	-0.015866
6043	-0.015855
6044	-0.015851
6045	-0.015847
6046	-0.01585
6047	-0.015844
6048	-0.015834
6049	-0.015826
6050	-0.015826
6051	-0.015836
6052	-0.015836
6053	-0.015825
6054	-0.015821
6055	-0.015816
6056	-0.015815
6057	-0.015809
6058	-0.015808
6059	-0.015809
6060	-0.015786
6061	-0.015779
6062	-0.015796
6063	-0.015815
6064	-0.015808
6065	-0.015808
6066	-0.015822
6067	-0.015824
6068	-0.015828
6069	-0.015823
6070	-0.015808
6071	-0.015815
6072	-0.015822
6073	-0.01581
6074	-0.015801
6075	-0.015812
6076	-0.01582
6077	-0.015818
6078	-0.015813
6079	-0.01582
6080	-0.015821
6081	-0.015816
6082	-0.015822
6083	-0.015814
6084	-0.01582
6085	-0.01582
6086	-0.015821
6087	-0.015827
6088	-0.015843
6089	-0.015836
6090	-0.015832
6091	-0.015828
6092	-0.015842
6093	-0.015839
6094	-0.015834
6095	-0.015836
6096	-0.015836
6097	-0.015838
6098	-0.015846
6099	-0.015864
6100	-0.015857
6101	-0.015836
6102	-0.01583
6103	-0.015849
6104	-0.015859
6105	-0.015862
6106	-0.015864
6107	-0.01587
6108	-0.015869
6109	-0.015867
6110	-0.01587
6111	-0.015879
6112	-0.015872
6113	-0.015867
6114	-0.015868
6115	-0.01587
6116	-0.015868
6117	-0.015874
6118	-0.015881
6119	-0.015878
6120	-0.015885
6121	-0.015882
6122	-0.015883
6123	-0.015862
6124	-0.015854
6125	-0.015861
6126	-0.015877
6127	-0.015894
6128	-0.015901
6129	-0.015909
6130	-0.015908
6131	-0.015907
6132	-0.015899
6133	-0.0159
6134	-0.015908
6135	-0.015907
6136	-0.015903
6137	-0.015904
6138	-0.015907
6139	-0.015898
6140	-0.015904
6141	-0.01592
6142	-0.015926
6143	-0.015922
6144	-0.01591
6145	-0.015906
6146	-0.015905
6147	-0.015901
6148	-0.015898
6149	-0.015904
6150	-0.015898
6151	-0.015892
6152	-0.015883
6153	-0.015873
6154	-0.01588
6155	-0.015876
6156	-0.015877
6157	-0.015879
6158	-0.01589
6159	-0.015889
6160	-0.015881
6161	-0.015877
6162	-0.015883
6163	-0.015886
6164	-0.015884
6165	-0.015879
6166	-0.015875
6167	-0.015872
6168	-0.015869
6169	-0.015874
6170	-0.015876
6171	-0.015853
6172	-0.015847
6173	-0.015854
6174	-0.015853
6175	-0.015857
6176	-0.015848
6177	-0.015835
6178	-0.015838
6179	-0.015847
6180	-0.015844
6181	-0.01584
6182	-0.015835
6183	-0.015835
6184	-0.015831
6185	-0.015828
6186	-0.015824
6187	-0.015824
6188	-0.01582
6189	-0.015812
6190	-0.015813
6191	-0.015826
6192	-0.015835
6193	-0.015837
6194	-0.015838
6195	-0.015836
6196	-0.01582
6197	-0.015816
6198	-0.015822
6199	-0.015834
6200	-0.015811
6201	-0.015796
6202	-0.015807
6203	-0.015826
6204	-0.015827
6205	-0.015839
6206	-0.015833
6207	-0.015819
6208	-0.015816
6209	-0.015822
6210	-0.015827
6211	-0.015831
6212	-0.015838
6213	-0.015836
6214	-0.015837
6215	-0.015835
6216	-0.015834
6217	-0.015831
6218	-0.015825
6219	-0.015823
6220	-0.015827
6221	-0.015826
6222	-0.015831
6223	-0.015841
6224	-0.015832
6225	-0.015841
6226	-0.015853
6227	-0.015847
6228	-0.015839
6229	-0.015841
6230	-0.015838
6231	-0.015843
6232	-0.015855
6233	-0.015858
6234	-0.01586
6235	-0.015856
6236	-0.015842
6237	0
6238	0
6239	-1.2e-05
6240	-9e-06
6241	9e-06
6242	1.9e-05
6243	1.4e-05
6244	6e-06
6245	-2e-06
6246	6e-06
6247	1.1e-05
6248	-1.1e-05
6249	-2.6e-05
6250	-2.9e-05
6251	-2.2e-05
6252	-2.7e-05
6253	-4.7e-05
6254	-5.6e-05
6255	-6.2e-05
6256	-6.1e-05
6257	-3.7e-05
6258	-2.1e-05
6259	-1.4e-05
6260	-1.4e-05
6261	-1.4e-05
6262	-2e-05
6263	-2.8e-05
6264	-3.6e-05
6265	-4.5e-05
6266	-4.1e-05
6267	-2.6e-05
6268	-2.9e-05
6269	-2.2e-05
6270	-2.9e-05
6271	-3.6e-05
6272	-2.4e-05
6273	-1e-06
6274	-6e-06
6275	-2.2e-05
6276	-2.3e-05
6277	-1.7e-05
6278	-2.1e-05
6279	-2.3e-05
6280	-1.9e-05
6281	-1.6e-05
6282	-1.9e-05
6283	-1.2e-05
6284	-6e-06
6285	4e-06
6286	1.2e-05
6287	2e-06
6288	-6e-06
6289	2e-06
6290	5e-06
6291	1.4e-05
6292	5.1e-05
6293	0.00013
6294	0.000191
6295	0.000214
6296	0.00023
6297	0.000263
6298	0.000322
6299	0.000409
6300	0.000552
6301	0.000708
6302	0.000854
6303	0.000983
6304	0.001132
6305	0.001275
6306	0.001419
6307	0.001577
6308	0.001743
6309	0.001894
6310	0.002017
6311	0.002131
6312	0.00226
6313	0.002376
6314	0.002497
6315	0.002615
6316	0.002723
6317	0.002806
6318	0.002877
6319	0.00295
6320	0.003019
6321	0.00306
6322	0.003097
6323	0.003107
6324	0.003104
6325	0.003109
6326	0.003139
6327	0.00315
6328	0.003133
6329	0.003097
6330	0.003056
6331	0.003021
6332	0.002984
6333	0.002962
6334	0.002933
6335	0.002897
6336	0.002864
6337	0.002835
6338	0.002791
6339	0.002745
6340	0.002703
6341	0.002649
6342	0.00259
6343	0.00254
6344	0.002511
6345	0.002479
6346	0.002436
6347	0.002393
6348	0.002358
6349	0.002327
6350	0.002294
6351	0.002263
6352	0.002218
6353	0.002182
6354	0.00213
6355	0.002074
6356	0.002025
6357	0.001981
6358	0.001939
6359	0.001915
6360	0.001896
6361	0.001863
6362	0.001834
6363	0.001816
6364	0.001793
6365	0.001764
6366	0.001743
6367	0.001731
6368	0.001725
6369	0.001694
6370	0.001653
6371	0.001615
6372	0.001596
6373	0.001596
6374	0.001586
6375	0.001579
6376	0.001559
6377	0.001542
6378	0.001534
6379	0.001531
6380	0.001495
6381	0.001472
6382	0.001449
6383	0.001441
6384	0.001446
6385	0.001451
6386	0.001439
6387	0.001423
6388	0.001409
6389	0.0014
6390	0.001385
6391	0.001354
6392	0.001311
6393	0.001274
6394	0.001265
6395	0.001248
6396	0.001217
6397	0.001213
6398	0.001237
6399	0.001248
6400	0.001241
6401	0.00124
6402	0.00125
6403	0.001264
6404	0.001276
6405	0.001275
6406	0.001257
6407	0.00122
6408	0.001212
6409	0.001208
6410	0.001201
6411	0.001187
6412	0.001187
6413	0.001196
6414	0.001205
6415	0.001196
6416	0.001169
6417	0.001139
6418	0.001129
6419	0.001126
6420	0.001122
6421	0.001109
6422	0.001102
6423	0.001105
6424	0.001112
6425	0.001099
6426	0.001088
6427	0.001068
6428	0.001056
6429	0.00105
6430	0.001057
6431	0.001062
6432	0.001043
6433	0.001021
6434	0.001024
6435	0.001026
6436	0.001015
6437	0.001007
6438	0.001005
6439	0.000983
6440	0.000976
6441	0.000975
6442	0.000976
6443	0.000983
6444	0.000981
6445	0.000961
6446	0.000951
6447	0.000941
6448	0.000931
6449	0.000928
6450	0.000921
6451	0.000917
6452	0.000902
6453	0.000897
6454	0.000886
6455	0.000888
6456	0.000898
6457	0.000902
6458	0.00088
6459	0.000851
6460	0.000839
6461	0.000847
6462	0.000855
6463	0.000864
6464	0.000866
6465	0.000849
6466	0.000834
6467	0.000812
6468	0.000803
6469	0.000824
6470	0.000839
6471	0.00083
6472	0.000809
6473	0.000794
6474	0.000789
6475	0.000798
6476	0.000812
6477	0.000807
6478	0.000811
6479	0.000809
6480	0.000802
6481	0.000791
6482	0.000782
6483	0.000777
6484	0.000772
6485	0.000769
6486	0.00077
6487	0.000778
6488	0.000769
6489	0.000763
6490	0.000764
6491	0.000771
6492	0.000765
6493	0.00076
6494	0.000762
6495	0.000777
6496	0.000776
6497	0.000771
6498	0.000764
6499	0.000761
6500	0.000755
6501	0.000743
6502	0.000724
6503	0.000722
6504	0.000731
6505	0.000737
6506	0.000729
6507	0.000718
6508	0.000711
6509	0.000705
6510	0.000707
6511	0.000704
6512	0.000692
6513	0.000692
6514	0.000707
6515	0.0007
6516	0.0007
6517	0.000704
6518	0.000718
6519	0.000731
6520	0.00074
6521	0.000736
6522	0.000737
6523	0.000731
6524	0.00071
6525	0.000689
6526	0.000703
6527	0.000712
6528	0.000706
6529	0.000703
6530	0.000694
6531	0.000678
6532	0.000682
6533	0.000703
6534	0.000717
6535	0.000714
6536	0.000731
6537	0.000738
6538	0.000762
6539	0.000759
6540	0.000743
6541	0.000725
6542	0.000736
6543	0.000749
6544	0.000747
6545	0.000745
6546	0.000729
6547	0.00072
6548	0.000725
6549	0.000731
6550	0.000729
6551	0.000719
6552	0.000718
6553	0.00071
6554	0.000691
6555	0.000688
6556	0.000693
6557	0.00071
6558	0.000718
6559	0.000734
6560	0.000744
6561	0.000742
6562	0.000738
6563	0.000728
6564	0.000732
6565	0.00073
6566	0.000738
6567	0.000754
6568	0.00077
6569	0.000787
6570	0.000795
6571	0.000787
6572	0.000775
6573	0.000772
6574	0.00077
6575	0.000768
6576	0.000764
6577	0.000759
6578	0.000762
6579	0.000776
6580	0.000787
6581	0.000783
6582	0.000773
6583	0.000765
6584	0.000772
6585	0.000779
6586	0.000797
6587	0.000804
6588	0.000821
6589	0.000847
6590	0.000846
6591	0.000852
6592	0.000848
6593	0.000838
6594	0.000834
6595	0.000822
6596	0.00082
6597	0.000834
6598	0.000844
6599	0.000846
6600	0.000838
6601	0.000824
6602	0.000827
6603	0.000826
6604	0.000806
6605	0.000798
6606	0.000812
6607	0.000837
6608	0.000839
6609	0.000832
6610	0.000837
6611	0.000817
6612	0.000801
6613	0.0008
6614	0.000812
6615	0.000812
6616	0.000816
6617	0.000828
6618	0.000843
6619	0.000849
6620	0.000829
6621	0.000814
6622	0.000814
6623	0.000821
6624	0.000819
6625	0.000823
6626	0.000817
6627	0.000815
6628	0.000818
6629	0.000806
6630	0.000787
6631	0.000771
6632	0.000776
6633	0.000782
6634	0.000796
6635	0.000814
6636	0.000813
6637	0.000807
6638	0.000793
6639	0.000786
6640	0.000787
6641	0.000793
6642	0.0008
6643	0.000801
6644	0.000797
6645	0.000805
6646	0.000819
6647	0.000811
6648	0.000783
6649	0.000767
6650	0.000762
6651	0.000766
6652	0.000771
6653	0.000777
6654	0.000786
6655	0.000772
6656	0.000757
6657	0.000766
6658	0.000767
6659	0.000772
6660	0.000783
6661	0.00079
6662	0.000777
6663	0.000777
6664	0.00077
6665	0.00077
6666	0.00078
6667	0.000788
6668	0.000777
6669	0.000752
6670	0.00073
6671	0.000733
6672	0.000737
6673	0.000733
6674	0.000733
6675	0.00074
6676	0.000744
6677	0.000735
6678	0.000725
6679	0.000711
6680	0.000711
6681	0.000724
6682	0.000729
6683	0.000712
6684	0.000696
6685	0.000691
6686	0.000704
6687	0.00071
6688	0.000711
6689	0.000693
6690	0.000692
6691	0.000679
6692	0.000692
6693	0.000717
6694	0.000713
6695	0.000696
6696	0.000679
6697	0.000695
6698	0.000718
6699	0.000713
6700	0.000692
6701	0.000677
6702	0.000687
6703	0.000693
6704	0.000684
6705	0.000673
6706	0.000673
6707	0.000677
6708	0.000677
6709	0.000664
6710	0.000653
6711	0.000661
6712	0.000665
6713	0.000672
6714	0.000677
6715	0.00067
6716	0.000655
6717	0.000657
6718	0.000678
6719	0.000671
6720	0.000682
6721	0.000674
6722	0.000665
6723	0.00066
6724	0.000655
6725	0.000663
6726	0.000683
6727	0.000687
6728	0.000686
6729	0.000687
6730	0.000695
6731	0.000688
6732	0.000681
6733	0.000688
6734	0.000712
6735	0.000719
6736	0.000731
6737	0.000733
6738	0.000724
6739	0.000721
6740	0.000714
6741	0.000715
6742	0.000728
6743	0.000744
6744	0.000731
6745	0.000721
6746	0.000728
6747	0.000745
6748	0.000732
6749	0.000722
6750	0.000729
6751	0.000738
6752	0.000728
6753	0.000719
6754	0.000714
6755	0.000708
6756	0.000713
6757	0.000708
6758	0.000694
6759	0.000693
6760	0.000699
6761	0.0007
6762	0.000705
6763	0.000716
6764	0.000727
6765	0.000732
6766	0.00073
6767	0.000736
6768	0.000726
6769	0.000714
6770	0.00072
6771	0.000731
6772	0.000726
6773	0.000711
6774	0.000703
6775	0.000709
6776	0.00071
6777	0.000699
6778	0.000697
6779	0.000693
6780	0.00068
6781	0.000682
6782	0.00069
6783	0.000688
6784	0.000692
6785	0.00069
6786	0.000685
6787	0.000671
6788	0.000667
6789	0.000669
6790	0.00066
6791	0.000667
6792	0.000673
6793	0.00069
6794	0.000681
6795	0.000687
6796	0.000686
6797	0.000683
6798	0.000661
6799	0.000654
6800	0.000668
6801	0.000672
6802	0.000659
6803	0.000652
6804	0.000655
6805	0.00066
6806	0.000665
6807	0.000658
6808	0.000658
6809	0.000658
6810	0.000649
6811	0.000639
6812	0.000629
6813	0.000633
6814	0.000654
6815	0.000667
6816	0.000677
6817	0.000669
6818	0.000654
6819	0.000644
6820	0.000647
6821	0.000638
6822	0.000631
6823	0.00063
6824	0.000632
6825	0.000627
6826	0.000626
6827	0.00063
6828	0.000631
6829	0.000629
6830	0.000629
6831	0.000638
6832	0.000648
6833	0.000648
6834	0.000658
6835	0.00068
6836	0.000685
6837	0.000682
6838	0.000682
6839	0.000679
6840	0.000685
6841	0.00069
6842	0.000684
6843	0.000687
6844	0.000699
6845	0.000696
6846	0.000693
6847	0.000684
6848	0.000679
6849	0.000675
6850	0.00067
6851	0.000673
6852	0.000672
6853	0.000664
6854	0.000653
6855	0.000663
6856	0.000669
6857	0.000668
6858	0.000667
6859	0.00068
6860	0.000684
6861	0.000666
6862	0.000656
6863	0.000672
6864	0.000698
6865	0.000692
6866	0.000691
6867	0.00069
6868	0.000694
6869	0.000672
6870	0.000653
6871	0.000655
6872	0.00065
6873	0.000646
6874	0.000649
6875	0.000654
6876	0.000657
6877	0.000668
6878	0.000678
6879	0.000668
6880	0.00066
6881	0.000654
6882	0.000645
6883	0.000637
6884	0.000645
6885	0.000644
6886	0.000642
6887	0.000627
6888	0.000633
6889	0.000638
6890	0.000641
6891	0.000648
6892	0.000641
6893	0.000631
6894	0.000626
6895	0.000631
6896	0.000623
6897	0.000617
6898	0.000617
6899	0.000629
6900	0.000651
6901	0.000655
6902	0.000649
6903	0.000632
6904	0.000614
6905	0.0006
6906	0.000586
6907	0.000585
6908	0.000586
6909	0.000593
6910	0.000605
6911	0.00062
6912	0.000636
6913	0.000639
6914	0.000626
6915	0.000616
6916	0.00061
6917	0.000618
6918	0.000619
6919	0.000627
6920	0.000637
6921	0.000637
6922	0.000627
6923	0.000615
6924	0.000618
6925	0.000623
6926	0.000628
6927	0.000636
6928	0.000636
6929	0.000627
6930	0.00062
6931	0.000623
6932	0.000624
6933	0.000609
6934	0.000603
6935	0.000609
6936	0.000631
6937	0.000622
6938	0.000615
6939	0.000614
6940	0.000636
6941	0.000635
6942	0.000645
6943	0.00065
6944	0.000646
6945	0.000635
6946	0.00063
6947	0.000629
6948	0.000626
6949	0.000624
6950	0.000594
6951	0.00059
6952	0.000597
6953	0.000621
6954	0.000633
6955	0.000633
6956	0.000629
6957	0.000618
6958	0.000606
6959	0.00061
6960	0.000618
6961	0.000621
6962	0.000619
6963	0.000608
6964	0.000609
6965	0.000624
6966	0.000624
6967	0.000618
6968	0.000616
6969	0.00062
6970	0.00062
6971	0.000612
6972	0.000629
6973	0.000641
6974	0.000637
6975	0.000634
6976	0.000634
6977	0.000615
6978	0.000601
6979	0.000617
6980	0.000625
6981	0.000609
6982	0.000596
6983	0.000593
6984	0.000596
6985	0.000598
6986	0.000587
6987	0.000578
6988	0.000576
6989	0.000577
6990	0.000579
6991	0.000582
6992	0.000582
6993	0.000587
6994	0.000595
6995	0.000601
6996	0.000594
6997	0.000602
6998	0.000598
6999	0.000598
7000	0.00059
7001	0.000588
7002	0.000589
7003	0.000577
7004	0.000555
7005	0.000561
7006	0.000584
7007	0.000599
7008	0.000597
7009	0.000596
7010	0.000588
7011	0.000575
7012	0.000574
7013	0.000569
7014	0.000562
7015	0.000555
7016	0.000553
7017	0.000551
7018	0.000559
7019	0.000555
7020	0.00055
7021	0.00055
7022	0.00054
7023	0.000527
7024	0.000541
7025	0.000553
7026	0.000552
7027	0.00057
7028	0.000581
7029	0.00058
7030	0.000555
7031	0.000554
7032	0.000555
7033	0.000546
7034	0.000545
7035	0.000544
7036	0.000545
7037	0.000545
7038	0.000568
7039	0.000572
7040	0.000561
7041	0.000544
7042	0.000538
7043	0.00054
7044	0.000535
7045	0.000537
7046	0.000544
7047	0.000544
7048	0.000553
7049	0.000567
7050	0.000569
7051	0.000566
7052	0.000561
7053	0.000553
7054	0.000552
7055	0.000548
7056	0.000536
7057	0.000539
7058	0.000544
7059	0.000558
7060	0.000568
7061	0.000573
7062	0.000564
7063	0.000559
7064	0.000553
7065	0.000563
7066	0.000578
7067	0.000596
7068	0.000588
7069	0.000584
7070	0.000583
7071	0.000577
7072	0.000577
7073	0.000578
7074	0.00059
7075	0.000601
7076	0.000621
7077	0.00062
7078	0.000618
7079	0.000633
7080	0.000646
7081	0.000653
7082	0.000658
7083	0.000643
7084	0.00064
7085	0.000626
7086	0.000627
7087	0.000629
7088	0.00063
7089	0.000637
7090	0.000639
7091	0.000664
7092	0.00068
7093	0.00069
7094	0.000676
7095	0.000663
7096	0.000649
7097	0.000657
7098	0.000657
7099	0.000651
7100	0.000641
7101	0.00064
7102	0.000657
7103	0.00068
7104	0.00068
7105	0.000654
7106	0.000643
7107	0.000639
7108	0.000644
7109	0.000637
7110	0.000625
7111	0.000615
7112	0.000622
7113	0.000638
7114	0.000653
7115	0.000657
7116	0.000655
7117	0.000646
7118	0.000654
7119	0.000671
7120	0.000669
7121	0.000656
7122	0.000656
7123	0.000651
7124	0.000661
7125	0.00066
7126	0.000654
7127	0.000662
7128	0.000665
7129	0.000656
7130	0.000655
7131	0.000635
7132	0.000638
7133	0.000643
7134	0.000655
7135	0.000644
7136	0.000642
7137	0.000654
7138	0.000667
7139	0.000682
7140	0.000671
7141	0.000661
7142	0.000641
7143	0.000625
7144	0.000632
7145	0.000656
7146	0.000661
7147	0.000641
7148	0.000634
7149	0.00063
7150	0.000637
7151	0.000647
7152	0.00065
7153	0.000632
7154	0.000625
7155	0.000624
7156	0.000616
7157	0.000602
7158	0.000596
7159	0.000605
7160	0.000621
7161	0.000617
7162	0.000618
7163	0.000625
7164	0.00062
7165	0.000621
7166	0.000616
7167	0.000599
7168	0.000599
7169	0.000584
7170	0.00057
7171	0.000576
7172	0.000588
7173	0.000589
7174	0.000588
7175	0.000577
7176	0.000566
7177	0.000544
7178	0.000543
7179	0.000568
7180	0.000587
7181	0.000585
7182	0.000582
7183	0.000575
7184	0.000551
7185	0.000542
7186	0.000553
7187	0.000561
7188	0.000565
7189	0.000577
7190	0.000565
7191	0.00055
7192	0.00056
7193	0.000563
7194	0.000555
7195	0.000546
7196	0.000541
7197	0.000547
7198	0.000552
7199	0.000539
7200	0.000517
7201	0.000503
7202	0.000507
7203	0.000513
7204	0.000525
7205	0.000528
7206	0.000529
7207	0.000523
7208	0.000515
7209	0.000529
7210	0.000526
7211	0.000529
7212	0.000505
7213	0.000498
7214	0.000505
7215	0.000495
7216	0.000494
7217	0.000503
7218	0.000523
7219	0.000523
7220	0.00052
7221	0.000512
7222	0.000497
7223	0.000479
7224	0.000476
7225	0.000492
7226	0.000493
7227	0.000481
7228	0.000485
7229	0.000479
7230	0.00047
7231	0.000466
7232	0.000462
7233	0.000476
7234	0.000473
7235	0.000466
7236	0.000475
7237	0.000481
7238	0.000481
7239	0.000493
7240	0.000476
7241	0.000483
7242	0.000475
7243	0.000459
7244	0.000454
7245	0.000453
7246	0.000451
7247	0.000442
7248	0.000434
7249	0.000442
7250	0.000441
7251	0.000436
7252	0.00044
7253	0.000451
7254	0.000451
7255	0.000448
7256	0.000427
7257	0.000427
7258	0.00042
7259	0.000417
7260	0.000415
7261	0.000418
7262	0.000427
7263	0.00043
7264	0.000431
7265	0.000434
7266	0.000434
7267	0.000426
7268	0.000406
7269	0.000406
7270	0.000415
7271	0.000422
7272	0.000427
7273	0.00044
7274	0.000447
7275	0.000454
7276	0.000446
7277	0.000425
7278	0.00043
7279	0.000446
7280	0.000446
7281	0.000438
7282	0.000446
7283	0.000461
7284	0.00046
7285	0.000462
7286	0.000484
7287	0.000488
7288	0.000473
7289	0.000476
7290	0.000475
7291	0.000476
7292	0.000477
7293	0.000477
7294	0.0005
7295	0.000516
7296	0.00053
7297	0.000516
7298	0.000517
7299	0.000533
7300	0.000526
7301	0.000492
7302	0.000488
7303	0.000502
7304	0.000512
7305	0.000519
7306	0.000514
7307	0.000509
7308	0.000527
7309	0.000539
7310	0.000542
7311	0.000532
7312	0.000522
7313	0.000514
7314	0.000523
7315	0.000529
7316	0.000543
7317	0.000561
7318	0.00056
7319	0.00055
7320	0.000551
7321	0.000561
7322	0.000565
7323	0.00056
7324	0.000556
7325	0.000557
7326	0.000555
7327	0.000561
7328	0.000563
7329	0.000563
7330	0.000569
7331	0.00057
7332	0.000568
7333	0.000557
7334	0.000542
7335	0.000543
7336	0.000544
7337	0.000547
7338	0.000532
7339	0.000521
7340	0.000531
7341	0.00053
7342	0.00054
7343	0.000544
7344	0.000543
7345	0.000547
7346	0.000556
7347	0.000553
7348	0.000555
7349	0.000548
7350	0.000535
7351	0.00053
7352	0.000547
7353	0.000549
7354	0.000532
7355	0.000521
7356	0.000516
7357	0.000518
7358	0.000523
7359	0.00053
7360	0.000523
7361	0.000499
7362	0.000489
7363	0.000492
7364	0.000504
7365	0.000505
7366	0.000499
7367	0.000488
7368	0.000498
7369	0.000499
7370	0.000487
7371	0.000473
7372	0.000481
7373	0.000493
7374	0.000501
7375	0.00049
7376	0.000474
7377	0.000475
7378	0.000475
7379	0.000476
7380	0.00047
7381	0.000472
7382	0.000464
7383	0.000464
7384	0.00047
7385	0.000464
7386	0.000459
7387	0.000466
7388	0.000465
7389	0.00046
7390	0.000451
7391	0.000438
7392	0.000434
7393	0.000428
7394	0.000435
7395	0.000447
7396	0.000453
7397	0.000442
7398	0.000439
7399	0.000442
7400	0.000448
7401	0.000455
7402	0.000467
7403	0.000451
7404	0.000427
7405	0.00041
7406	0.000408
7407	0.000406
7408	0.000395
7409	0.000398
7410	0.000412
7411	0.000407
7412	0.000408
7413	0.000418
7414	0.000403
7415	0.00038
7416	0.000372
7417	0.000367
7418	0.000366
7419	0.00037
7420	0.000377
7421	0.000393
7422	0.000391
7423	0.000386
7424	0.000377
7425	0.000375
7426	0.000361
7427	0.000359
7428	0.000368
7429	0.000359
7430	0.000365
7431	0.000377
7432	0.00039
7433	0.000392
7434	0.000401
7435	0.00041
7436	0.000408
7437	0.000398
7438	0.000405
7439	0.00041
7440	0.000402
7441	0.000399
7442	0.000403
7443	0.00041
7444	0.000415
7445	0.000428
7446	0.000427
7447	0.000401
7448	0.000403
7449	0.000414
7450	0.000426
7451	0.000415
7452	0.000397
7453	0.000388
7454	0.0004
7455	0.000403
7456	0.000398
7457	0.00039
7458	0.000404
7459	0.00041
7460	0.000409
7461	0.000404
7462	0.000421
7463	0.000424
7464	0.000419
7465	0.000415
7466	0.000424
7467	0.000433
7468	0.000426
7469	0.000436
7470	0.000449
7471	0.000438
7472	0.00044
7473	0.000447
7474	0.00045
7475	0.000441
7476	0.000443
7477	0.000438
7478	0.000426
7479	0.000431
7480	0.000457
7481	0.000473
7482	0.000462
7483	0.000445
7484	0.000447
7485	0.000475
7486	0.000474
7487	0.000456
7488	0.000432
7489	0.000421
7490	0.00042
7491	0.000421
7492	0.000424
7493	0.000429
7494	0.00043
7495	0.000442
7496	0.000448
7497	0.000455
7498	0.00044
7499	0.000423
7500	0.000435
7501	0.000447
7502	0.000445
7503	0.000429
7504	0.000436
7505	0.000447
7506	0.000443
7507	0.000429
7508	0.000414
7509	0.000422
7510	0.000425
7511	0.000417
7512	0.000399
7513	0.000396
7514	0.000397
7515	0.000393
7516	0.000397
7517	0.000406
7518	0.000398
7519	0.000389
7520	0.000398
7521	0.000398
7522	0.000407
7523	0.000404
7524	0.000399
7525	0.000398
7526	0.000418
7527	0.000424
7528	0.0004
7529	0.000387
7530	0.000397
7531	0.000386
7532	0.000375
7533	0.000387
7534	0.00039
7535	0.000391
7536	0.000396
7537	0.000389
7538	0.000388
7539	0.000389
7540	0.000383
7541	0.000398
7542	0.000388
7543	0.00039
7544	0.000401
7545	0.000416
7546	0.000407
7547	0.000398
7548	0.000382
7549	0.000386
7550	0.000391
7551	0.000391
7552	0.0004
7553	0.000394
7554	0.000391
7555	0.000393
7556	0.000409
7557	0.000405
7558	0.000393
7559	0.000383
7560	0.000378
7561	0.000363
7562	0.000361
7563	0.00036
7564	0.000374
7565	0.000371
7566	0.000361
7567	0.000346
7568	0.000359
7569	0.000372
7570	0.000362
7571	0.000363
7572	0.00036
7573	0.000344
7574	0.000341
7575	0.000339
7576	0.000348
7577	0.00036
7578	0.000362
7579	0.000356
7580	0.000344
7581	0.000351
7582	0.000366
7583	0.000369
7584	0.000346
7585	0.000329
7586	0.000333
7587	0.000334
7588	0.000327
7589	0.000315
7590	0.000314
7591	0.000326
7592	0.000341
7593	0.000349
7594	0.00036
7595	0.000362
7596	0.000339
7597	0.000333
7598	0.000326
7599	0.000319
7600	0.000315
7601	0.000317
7602	0.000308
7603	0.000312
7604	0.000311
7605	0.000305
7606	0.000312
7607	0.000312
7608	0.000312
7609	0.000307
7610	0.000302
7611	0.000293
7612	0.000272
7613	0.000279
7614	0.000281
7615	0.000279
7616	0.000271
7617	0.000258
7618	0.000255
7619	0.000247
7620	0.000255
7621	0.000259
7622	0.000256
7623	0.000257
7624	0.000267
7625	0.000265
7626	0.000268
7627	0.000273
7628	0.000295
7629	0.000299
7630	0.000288
7631	0.000278
7632	0.000278
7633	0.000284
7634	0.000288
7635	0.000292
7636	0.000281
7637	0.000266
7638	0.000255
7639	0.000265
7640	0.000284
7641	0.000294
7642	0.000295
7643	0.000294
7644	0.000289
7645	0.000309
7646	0.000313
7647	0.000313
7648	0.000303
7649	0.000306
7650	0.000317
7651	0.000323
7652	0.00031
7653	0.000294
7654	0.000299
7655	0.000309
7656	0.000316
7657	0.000319
7658	0.000324
7659	0.000316
7660	0.000301
7661	0.000307
7662	0.000311
7663	0.000312
7664	0.000325
7665	0.000337
7666	0.000346
7667	0.000363
7668	0.000365
7669	0.000361
7670	0.000353
7671	0.000351
7672	0.000343
7673	0.000357
7674	0.000383
7675	0.000408
7676	0.000401
7677	0.000392
7678	0.000393
7679	0.000392
7680	0.000385
7681	0.000381
7682	0.000375
7683	0.000365
7684	0.000359
7685	0.000357
7686	0.000377
7687	0.00039
7688	0.000387
7689	0.000357
7690	0.000369
7691	0.00038
7692	0.000392
7693	0.000393
7694	0.00039
7695	0.000377
7696	0.000367
7697	0.000374
7698	0.00039
7699	0.000398
7700	0.000383
7701	0.000367
7702	0.000356
7703	0.000366
7704	0.00038
7705	0.000379
7706	0.000363
7707	0.000351
7708	0.000364
7709	0.000377
7710	0.000385
7711	0.000379
7712	0.000372
7713	0.000372
7714	0.000374
7715	0.000376
7716	0.000384
7717	0.00038
7718	0.000374
7719	0.000375
7720	0.000384
7721	0.000386
7722	0.000374
7723	0.000379
7724	0.000377
7725	0.000382
7726	0.000397
7727	0.000398
7728	0.00038
7729	0.000369
7730	0.000371
7731	0.000371
7732	0.000374
7733	0.000369
7734	0.000365
7735	0.000361
7736	0.000374
7737	0.000372
7738	0.000355
7739	0.000334
7740	0.000333
7741	0.000349
7742	0.000351
7743	0.000336
7744	0.000339
7745	0.000346
7746	0.00034
7747	0.000337
7748	0.000331
7749	0.000333
7750	0.000353
7751	0.000356
7752	0.00035
7753	0.000339
7754	0.000318
7755	0.000318
7756	0.000342
7757	0.00034
7758	0.000327
7759	0.000304
7760	0.000287
7761	0.000291
7762	0.000312
7763	0.000324
7764	0.000299
7765	0.000284
7766	0.00028
7767	0.000281
7768	0.000283
7769	0.000292
7770	0.000293
7771	0.000286
7772	0.000301
7773	0.000311
7774	0.000307
7775	0.000303
7776	0.000295
7777	0.000291
7778	0.000282
7779	0.000289
7780	0.000291
7781	0.000281
7782	0.000275
7783	0.000274
7784	0.000288
7785	0.000293
7786	0.00028
7787	0.000267
7788	0.000271
7789	0.000292
7790	0.000285
7791	0.000283
7792	0.000305
7793	0.000324
7794	0.000314
7795	0.000312
7796	0.000306
7797	0.000306
7798	0.000312
7799	0.000321
7800	0.000316
7801	0.000296
7802	0.000288
7803	0.000284
7804	0.000286
7805	0.000292
7806	0.000311
7807	0.000315
7808	0.000318
7809	0.000308
7810	0.000314
7811	0.000327
7812	0.000328
7813	0.000323
7814	0.00033
7815	0.000338
7816	0.000354
7817	0.000365
7818	0.00036
7819	0.000355
7820	0.000354
7821	0.000355
7822	0.000356
7823	0.000354
7824	0.000362
7825	0.000371
7826	0.000367
7827	0.000364
7828	0.00035
7829	0.00036
7830	0.000364
7831	0.000369
7832	0.000376
7833	0.000374
7834	0.000366
7835	0.000371
7836	0.00037
7837	0.000374
7838	0.000391
7839	0.000393
7840	0.000385
7841	0.000377
7842	0.000381
7843	0.000382
7844	0.00038
7845	0.000378
7846	0.000379
7847	0.000379
7848	0.000371
7849	0.00038
7850	0.00038
7851	0.000361
7852	0.00035
7853	0.000345
7854	0.000347
7855	0.000351
7856	0.000352
7857	0.000355
7858	0.000372
7859	0.00038
7860	0.00039
7861	0.000385
7862	0.000359
7863	0.000348
7864	0.000357
7865	0.000368
7866	0.000361
7867	0.000355
7868	0.000372
7869	0.000377
7870	0.000377
7871	0.00038
7872	0.000372
7873	0.000349
7874	0.000357
7875	0.000361
7876	0.000364
7877	0.00035
7878	0.000354
7879	0.000355
7880	0.000352
7881	0.000355
7882	0.000362
7883	0.000351
7884	0.000344
7885	0.000352
7886	0.000373
7887	0.00037
7888	0.000365
7889	0.000349
7890	0.000359
7891	0.000366
7892	0.000366
7893	0.000343
7894	0.000349
7895	0.000345
7896	0.000357
7897	0.000357
7898	0.000357
7899	0.000352
7900	0.000352
7901	0.00035
7902	0.000349
7903	0.000335
7904	0.000323
7905	0.000324
7906	0.000327
7907	0.000335
7908	0.000344
7909	0.000353
7910	0.000348
7911	0.00034
7912	0.000339
7913	0.000336
7914	0.000321
7915	0.000326
7916	0.000335
7917	0.000342
7918	0.000334
7919	0.000341
7920	0.000353
7921	0.000352
7922	0.000349
7923	0.000336
7924	0.000326
7925	0.000328
7926	0.000343
7927	0.00035
7928	0.000341
7929	0.000324
7930	0.00032
7931	0.000313
7932	0.000315
7933	0.000321
7934	0.000318
7935	0.000334
7936	0.000331
7937	0.000329
7938	0.000333
7939	0.000345
7940	0.000345
7941	0.000348
7942	0.000348
7943	0.000351
7944	0.000354
7945	0.000343
7946	0.000337
7947	0.000326
7948	0.000341
7949	0.000342
7950	0.000329
7951	0.000316
7952	0.000327
7953	0.000335
7954	0.000328
7955	0.000331
7956	0.00033
7957	0.000315
7958	0.000301
7959	0.000311
7960	0.000329
7961	0.000326
7962	0.000311
7963	0.000317
7964	0.00033
7965	0.000338
7966	0.000342
7967	0.000343
7968	0.000341
7969	0.000343
7970	0.00035
7971	0.000349
7972	0.00033
7973	0.000331
7974	0.000338
7975	0.000336
7976	0.000333
7977	0.000329
7978	0.000327
7979	0.000319
7980	0.000324
7981	0.000325
7982	0.000329
7983	0.000315
7984	0.000303
7985	0.00031
7986	0.000316
7987	0.000321
7988	0.000328
7989	0.000312
7990	0.000316
7991	0.000327
7992	0.000339
7993	0.000341
7994	0.00034
7995	0.000332
7996	0.000346
7997	0.000356
7998	0.000346
[truncated: 3,274 more rows]

## Sheet: Q372dC - SEC 1
Time	UV
6000	-0.006853
6001	-0.006853
6002	-0.006852
6003	-0.006847
6004	-0.006839
6005	-0.006842
6006	-0.006839
6007	-0.006828
6008	-0.006833
6009	-0.006838
6010	-0.006839
6011	-0.006846
6012	-0.006876
6013	-0.006886
6014	-0.006872
6015	-0.006866
6016	-0.006869
6017	-0.006875
6018	-0.006879
6019	-0.00689
6020	-0.006892
6021	-0.006884
6022	-0.006874
6023	-0.006881
6024	-0.00689
6025	-0.006898
6026	-0.006875
6027	-0.006871
6028	-0.006896
6029	-0.006908
6030	-0.006905
6031	-0.006885
6032	-0.006889
6033	-0.0069
6034	-0.006922
6035	-0.006922
6036	-0.006917
6037	-0.006902
6038	-0.006897
6039	-0.006893
6040	-0.006889
6041	-0.006882
6042	-0.006876
6043	-0.006884
6044	-0.006889
6045	-0.006893
6046	-0.006914
6047	-0.006925
6048	-0.006916
6049	-0.006904
6050	-0.006894
6051	-0.006906
6052	-0.006917
6053	-0.006926
6054	-0.006922
6055	-0.006924
6056	-0.006913
6057	-0.006906
6058	-0.006904
6059	-0.006893
6060	-0.006891
6061	-0.0069
6062	-0.006921
6063	-0.006929
6064	-0.006914
6065	-0.006901
6066	-0.006911
6067	-0.00692
6068	-0.006926
6069	-0.006927
6070	-0.006944
6071	-0.006957
6072	-0.00695
6073	-0.006949
6074	-0.006946
6075	-0.006937
6076	-0.006945
6077	-0.006959
6078	-0.006955
6079	-0.00695
6080	-0.006946
6081	-0.006947
6082	-0.006948
6083	-0.006954
6084	-0.006953
6085	-0.006959
6086	-0.006957
6087	-0.006934
6088	-0.006927
6089	-0.006921
6090	-0.006935
6091	-0.006947
6092	-0.006953
6093	-0.006961
6094	-0.006962
6095	-0.006968
6096	-0.006952
6097	-0.006953
6098	-0.006954
6099	-0.006964
6100	-0.006968
6101	-0.006963
6102	-0.006956
6103	-0.006954
6104	-0.006966
6105	-0.006977
6106	-0.006976
6107	-0.00698
6108	-0.00698
6109	-0.006985
6110	-0.00698
6111	-0.006968
6112	-0.006957
6113	-0.006971
6114	-0.006983
6115	-0.006978
6116	-0.00698
6117	-0.006972
6118	-0.006958
6119	-0.006961
6120	-0.006974
6121	-0.006972
6122	-0.006966
6123	-0.006966
6124	-0.00697
6125	-0.006969
6126	-0.006966
6127	-0.006954
6128	-0.006954
6129	-0.006958
6130	-0.006959
6131	-0.00696
6132	-0.006949
6133	-0.006925
6134	-0.006916
6135	-0.00694
6136	-0.006951
6137	-0.00695
6138	-0.006939
6139	-0.006939
6140	-0.006937
6141	-0.006934
6142	-0.00691
6143	-0.006888
6144	-0.006876
6145	-0.00688
6146	-0.00689
6147	-0.006899
6148	-0.006907
6149	-0.006922
6150	-0.006922
6151	-0.006925
6152	-0.006915
6153	-0.006913
6154	-0.00691
6155	-0.006897
6156	-0.006885
6157	-0.006893
6158	-0.0069
6159	-0.006889
6160	-0.006878
6161	-0.006868
6162	-0.006869
6163	-0.006883
6164	-0.006891
6165	-0.006888
6166	-0.006875
6167	-0.00689
6168	-0.006902
6169	-0.006898
6170	-0.006884
6171	-0.006888
6172	-0.00689
6173	-0.006895
6174	-0.006899
6175	-0.006893
6176	-0.006891
6177	-0.0069
6178	-0.006897
6179	-0.006883
6180	-0.006893
6181	-0.006903
6182	-0.006899
6183	-0.006895
6184	-0.006899
6185	-0.006908
6186	-0.006899
6187	-0.006893
6188	-0.006899
6189	-0.006905
6190	-0.006905
6191	-0.006901
6192	-0.006906
6193	-0.006913
6194	-0.006914
6195	-0.006906
6196	-0.006903
6197	-0.006898
6198	-0.006913
6199	-0.006939
6200	-0.006939
6201	-0.006935
6202	-0.00693
6203	-0.006913
6204	-0.00691
6205	-0.006926
6206	-0.006945
6207	-0.006954
6208	-0.006939
6209	-0.006937
6210	-0.006948
6211	-0.00695
6212	-0.006943
6213	-0.006944
6214	-0.006949
6215	-0.006956
6216	-0.006973
6217	-0.006963
6218	-0.006958
6219	-0.006952
6220	-0.006953
6221	-0.006943
6222	-0.006935
6223	-0.006926
6224	-0.006936
6225	-0.006945
6226	-0.006951
6227	-0.006967
6228	-0.006971
6229	-0.006967
6230	-0.006962
6231	-0.006968
6232	-0.006983
6233	-0.006987
6234	-0.006988
6235	-0.006987
6236	-0.006985
6237	-0.006984
6238	0
6239	0
6240	-1.2e-05
6241	-2.2e-05
6242	-1.5e-05
6243	-1.9e-05
6244	-9e-06
6245	4e-06
6246	-5e-06
6247	-1.8e-05
6248	-2.8e-05
6249	-3e-05
6250	-2.2e-05
6251	-2.4e-05
6252	-1.6e-05
6253	-2.6e-05
6254	-1.6e-05
6255	-1e-05
6256	-4e-06
6257	-7e-06
6258	-9e-06
6259	-7e-06
6260	-6e-06
6261	-5e-06
6262	-3e-06
6263	-1e-06
6264	-4e-06
6265	-2.2e-05
6266	-2.4e-05
6267	-2.8e-05
6268	-2.4e-05
6269	-3.3e-05
6270	-3.7e-05
6271	-2.8e-05
6272	-1e-05
6273	8e-06
6274	1.1e-05
6275	-1.1e-05
6276	-1.7e-05
6277	-3e-06
6278	2e-06
6279	1.1e-05
6280	1.5e-05
6281	1.8e-05
6282	2.3e-05
6283	3.9e-05
6284	3.4e-05
6285	2.3e-05
6286	3.7e-05
6287	4.8e-05
6288	5.6e-05
6289	5.6e-05
6290	4.3e-05
6291	4.3e-05
6292	5.8e-05
6293	7.2e-05
6294	7.8e-05
6295	8.5e-05
6296	9.4e-05
6297	8.8e-05
6298	7.7e-05
6299	7.8e-05
6300	9.1e-05
6301	9.8e-05
6302	0.000104
6303	0.000103
6304	0.0001
6305	0.000108
6306	0.000116
6307	0.000124
6308	0.000117
6309	0.000116
6310	0.000124
6311	0.000135
6312	0.000132
6313	0.00013
6314	0.000141
6315	0.000142
6316	0.000136
6317	0.000121
6318	0.000113
6319	0.000122
6320	0.000126
6321	0.000132
6322	0.000138
6323	0.000139
6324	0.000139
6325	0.000137
6326	0.000134
6327	0.000137
6328	0.000139
6329	0.000131
6330	0.000131
6331	0.000132
6332	0.000119
6333	0.000106
6334	0.000114
6335	0.000125
6336	0.000124
6337	0.000113
6338	0.000117
6339	0.000125
6340	0.000125
6341	0.000112
6342	0.000107
6343	0.000112
6344	0.00011
6345	0.000119
6346	0.000133
6347	0.000137
6348	0.000131
6349	0.000125
6350	0.000126
6351	0.00012
6352	0.000113
6353	0.000115
6354	0.000116
6355	0.00013
6356	0.000125
6357	0.000115
6358	0.000108
6359	9.8e-05
6360	9.6e-05
6361	9.7e-05
6362	9.3e-05
6363	9.8e-05
6364	0.000103
6365	8.9e-05
6366	8.1e-05
6367	8.6e-05
6368	8.8e-05
6369	7.7e-05
6370	6.9e-05
6371	6.7e-05
6372	7.2e-05
6373	7.3e-05
6374	5.4e-05
6375	4.8e-05
6376	4.5e-05
6377	6.1e-05
6378	7.9e-05
6379	8.6e-05
6380	8.5e-05
6381	6.7e-05
6382	5.3e-05
6383	5.3e-05
6384	5.4e-05
6385	5.3e-05
6386	4.6e-05
6387	5e-05
6388	4.2e-05
6389	4.1e-05
6390	3.3e-05
6391	2.3e-05
6392	7e-06
6393	3e-06
6394	1.2e-05
6395	1.6e-05
6396	3e-06
6397	-1e-05
6398	-1.6e-05
6399	-1.1e-05
6400	-1.2e-05
6401	-7e-06
6402	1.5e-05
6403	6e-06
6404	-2e-06
6405	3e-06
6406	1.7e-05
6407	1.3e-05
6408	2e-06
6409	-1.1e-05
6410	-4e-06
6411	7e-06
6412	-1e-06
6413	-1.7e-05
6414	-1e-05
6415	0
6416	1.2e-05
6417	1.7e-05
6418	1.9e-05
6419	1.8e-05
6420	2.9e-05
6421	2.4e-05
6422	2.5e-05
6423	2.7e-05
6424	3.2e-05
6425	2.9e-05
6426	3.9e-05
6427	3.5e-05
6428	2.7e-05
6429	3.1e-05
6430	3.3e-05
6431	3.7e-05
6432	4.8e-05
6433	6.1e-05
6434	7.7e-05
6435	8.7e-05
6436	8.9e-05
6437	8.3e-05
6438	7.9e-05
6439	8.2e-05
6440	8e-05
6441	6.9e-05
6442	7.1e-05
6443	7.3e-05
6444	7.9e-05
6445	7e-05
6446	7.6e-05
6447	7.4e-05
6448	6.6e-05
6449	7e-05
6450	8.2e-05
6451	7.6e-05
6452	7.9e-05
6453	7e-05
6454	7.2e-05
6455	6.3e-05
6456	6e-05
6457	5.7e-05
6458	5.8e-05
6459	5.7e-05
6460	5.1e-05
6461	5.6e-05
6462	6.2e-05
6463	5.6e-05
6464	4.7e-05
6465	4.6e-05
6466	5.5e-05
6467	5.4e-05
6468	3.7e-05
6469	3.7e-05
6470	5.3e-05
6471	5.5e-05
6472	5.4e-05
6473	5.7e-05
6474	4.7e-05
6475	4.9e-05
6476	4.2e-05
6477	3.4e-05
6478	2.8e-05
6479	1.9e-05
6480	1.4e-05
6481	1.7e-05
6482	1.6e-05
6483	1.1e-05
6484	2.6e-05
6485	2.9e-05
6486	2.6e-05
6487	2.1e-05
6488	1.4e-05
6489	5e-06
6490	9e-06
6491	5e-06
6492	4e-06
6493	-7e-06
6494	-1.4e-05
6495	-1e-05
6496	-3e-06
6497	-1e-06
6498	-2e-06
6499	-1.2e-05
6500	-2.3e-05
6501	-2.9e-05
6502	-4.2e-05
6503	-2.9e-05
6504	-1.4e-05
6505	-1.2e-05
6506	-1.3e-05
6507	-8e-06
6508	-1.6e-05
6509	-2.2e-05
6510	-1.7e-05
6511	-1e-05
6512	-1.3e-05
6513	-1.9e-05
6514	-2.2e-05
6515	-2.4e-05
6516	-2e-05
6517	-3e-06
6518	-3e-06
6519	-1.3e-05
6520	-1.9e-05
6521	-1.2e-05
6522	-1.5e-05
6523	-2e-06
6524	-9e-06
6525	-1.2e-05
6526	-6e-06
6527	8e-06
6528	1.4e-05
6529	1.1e-05
6530	-2e-06
6531	1e-06
6532	-2e-06
6533	-1.7e-05
6534	-3e-05
6535	-1.3e-05
6536	-6e-06
6537	-1.1e-05
6538	-6e-06
6539	4e-06
6540	-1e-06
6541	-1.9e-05
6542	-8e-06
6543	5e-06
6544	-1e-06
6545	-2.3e-05
6546	-2.8e-05
6547	-1.9e-05
6548	-1.2e-05
6549	-6e-06
6550	-1.4e-05
6551	-1.6e-05
6552	-2.6e-05
6553	-2.1e-05
6554	-1.5e-05
6555	-1.3e-05
6556	-2.1e-05
6557	-3.3e-05
6558	-4.9e-05
6559	-4e-05
6560	-3.7e-05
6561	-3.8e-05
6562	-5.1e-05
6563	-5.4e-05
6564	-5.2e-05
6565	-4.8e-05
6566	-4.5e-05
6567	-5.2e-05
6568	-6.7e-05
6569	-7.1e-05
6570	-6.3e-05
6571	-5.7e-05
6572	-6.8e-05
6573	-7.7e-05
6574	-6.8e-05
6575	-5.5e-05
6576	-4.2e-05
6577	-4.3e-05
6578	-4.7e-05
6579	-4.8e-05
6580	-3.3e-05
6581	-2.4e-05
6582	-3.2e-05
6583	-3.6e-05
6584	-4.2e-05
6585	-4.3e-05
6586	-2.6e-05
6587	-2.7e-05
6588	-4.6e-05
6589	-6e-05
6590	-4.1e-05
6591	-2.6e-05
6592	-2.4e-05
6593	-3.7e-05
6594	-3.9e-05
6595	-3.7e-05
6596	-2.9e-05
6597	-3.6e-05
6598	-4.3e-05
6599	-4.3e-05
6600	-3.9e-05
6601	-3e-05
6602	-1e-05
6603	5e-06
6604	-3e-06
6605	-2e-06
6606	-2e-06
6607	0
6608	1.1e-05
6609	-4e-06
6610	-4e-06
6611	-2e-06
6612	-2e-06
6613	-5e-06
6614	-7e-06
6615	-2e-06
6616	-7e-06
6617	3e-06
6618	-1e-06
6619	9e-06
6620	1.1e-05
6621	2.2e-05
6622	3e-05
6623	4.1e-05
6624	3.9e-05
6625	2.7e-05
6626	3.1e-05
6627	3.7e-05
6628	4.7e-05
6629	4.7e-05
6630	5.3e-05
6631	4.6e-05
6632	5.7e-05
6633	5.5e-05
6634	6.5e-05
6635	6.6e-05
6636	6.1e-05
6637	5.7e-05
6638	5.6e-05
6639	6.6e-05
6640	6.1e-05
6641	5.9e-05
6642	3.8e-05
6643	4.6e-05
6644	5.9e-05
6645	7.2e-05
6646	8.3e-05
6647	7.5e-05
6648	6.1e-05
6649	5.5e-05
6650	5.7e-05
6651	6.8e-05
6652	5.7e-05
6653	3.1e-05
6654	2.3e-05
6655	4e-05
6656	5.8e-05
6657	4.3e-05
6658	4.8e-05
6659	5.7e-05
6660	6.7e-05
6661	6.7e-05
6662	4.6e-05
6663	3.2e-05
6664	3.2e-05
6665	4.1e-05
6666	4.7e-05
6667	4.9e-05
6668	5.2e-05
6669	5.9e-05
6670	6.6e-05
6671	7.9e-05
6672	5.8e-05
6673	4e-05
6674	4.3e-05
6675	5.7e-05
6676	6.5e-05
6677	7.4e-05
6678	7.4e-05
6679	7.2e-05
6680	8e-05
6681	7.6e-05
6682	7.6e-05
6683	5.8e-05
6684	4.4e-05
6685	4.9e-05
6686	5.9e-05
6687	6.3e-05
6688	5.5e-05
6689	4.5e-05
6690	3.7e-05
6691	5.2e-05
6692	5.2e-05
6693	4.4e-05
6694	3.9e-05
6695	4.3e-05
6696	3.6e-05
6697	3e-05
6698	4.3e-05
6699	4.8e-05
6700	4.1e-05
6701	3.2e-05
6702	4.1e-05
6703	4.8e-05
6704	5e-05
6705	4.5e-05
6706	3.1e-05
6707	2.7e-05
6708	4.1e-05
6709	5.5e-05
6710	6.3e-05
6711	5.6e-05
6712	6e-05
6713	6.1e-05
6714	6.9e-05
6715	6.2e-05
6716	5.3e-05
6717	5.5e-05
6718	6.2e-05
6719	5.3e-05
6720	5.6e-05
6721	6.7e-05
6722	6.3e-05
6723	6.9e-05
6724	8.1e-05
6725	7.3e-05
6726	5.9e-05
6727	5.8e-05
6728	7e-05
6729	7.5e-05
6730	7.5e-05
6731	5.9e-05
6732	4.2e-05
6733	5.1e-05
6734	6.3e-05
6735	5.9e-05
6736	5.3e-05
6737	5.2e-05
6738	6.4e-05
6739	6.5e-05
6740	5.5e-05
6741	5.5e-05
6742	5.4e-05
6743	5.5e-05
6744	6.6e-05
6745	6.6e-05
6746	6.2e-05
6747	5.4e-05
6748	5.1e-05
6749	4.8e-05
6750	4.4e-05
6751	5e-05
6752	5.2e-05
6753	5e-05
6754	6e-05
6755	7e-05
6756	7e-05
6757	7.4e-05
6758	6.8e-05
6759	6.1e-05
6760	6.3e-05
6761	6.4e-05
6762	5.9e-05
6763	6.6e-05
6764	7.9e-05
6765	7.7e-05
6766	6.6e-05
6767	5.3e-05
6768	5.5e-05
6769	4e-05
6770	3.6e-05
6771	3.8e-05
6772	5e-05
6773	4.9e-05
6774	4.8e-05
6775	3.6e-05
6776	3.2e-05
6777	2.3e-05
6778	3.2e-05
6779	4.1e-05
6780	3.2e-05
6781	1.9e-05
6782	2.5e-05
6783	3.5e-05
6784	3.5e-05
6785	1.9e-05
6786	1e-06
6787	-8e-06
6788	0
6789	7e-06
6790	1.2e-05
6791	1.5e-05
6792	1.8e-05
6793	2.2e-05
6794	2.8e-05
6795	1.8e-05
6796	2.2e-05
6797	1.7e-05
6798	1.6e-05
6799	2.4e-05
6800	2.8e-05
6801	2.5e-05
6802	2.2e-05
6803	3.7e-05
6804	4.9e-05
6805	4.6e-05
6806	3.7e-05
6807	2.8e-05
6808	2e-05
6809	2e-05
6810	2.1e-05
6811	2.1e-05
6812	3.4e-05
6813	4.7e-05
6814	5.7e-05
6815	5.4e-05
6816	5.6e-05
6817	5.7e-05
6818	4.5e-05
6819	4.8e-05
6820	4.7e-05
6821	4.8e-05
6822	4.5e-05
6823	5.1e-05
6824	5.8e-05
6825	6.7e-05
6826	7.1e-05
6827	8.1e-05
6828	7.7e-05
6829	6.9e-05
6830	6.3e-05
6831	6.8e-05
6832	7.9e-05
6833	8.3e-05
6834	8.5e-05
6835	8.3e-05
6836	9.3e-05
6837	0.00011
6838	0.000111
6839	0.000106
6840	0.000111
6841	0.000122
6842	0.000116
6843	0.000122
6844	0.000123
6845	0.00012
6846	0.000125
6847	0.000145
6848	0.000157
6849	0.000148
6850	0.000141
6851	0.000141
6852	0.000147
6853	0.000143
6854	0.000134
6855	0.000133
6856	0.000134
6857	0.000143
6858	0.000153
6859	0.000144
6860	0.000139
6861	0.000131
6862	0.000126
6863	0.000125
6864	0.000126
6865	0.000123
6866	0.00014
6867	0.000147
6868	0.000158
6869	0.000162
6870	0.00016
6871	0.000157
6872	0.000151
6873	0.000149
6874	0.000149
6875	0.000139
6876	0.000136
6877	0.000136
6878	0.000139
6879	0.00014
6880	0.000136
6881	0.000132
6882	0.000122
6883	0.00011
6884	0.000117
6885	0.000132
6886	0.000142
6887	0.000133
6888	0.000121
6889	0.000118
6890	0.000138
6891	0.000135
6892	0.00013
6893	0.000128
6894	0.000136
6895	0.000126
6896	0.000121
6897	0.000126
6898	0.000119
6899	0.00011
6900	0.000112
6901	0.000106
6902	0.000103
6903	0.000107
6904	0.000112
6905	0.000117
6906	0.000107
6907	0.000101
6908	0.000109
6909	0.000108
6910	0.000116
6911	0.000123
6912	0.000139
6913	0.00014
6914	0.000132
6915	0.000129
6916	0.000122
6917	0.00012
6918	0.000112
6919	0.000112
6920	0.000116
6921	0.00011
6922	0.000123
6923	0.000113
6924	8.5e-05
6925	7.9e-05
6926	9.3e-05
6927	9.7e-05
6928	9.8e-05
6929	0.00011
6930	0.000116
6931	0.000112
6932	8.7e-05
6933	8.6e-05
6934	8.7e-05
6935	8.6e-05
6936	9.4e-05
6937	0.000102
6938	9.8e-05
6939	8.3e-05
6940	8e-05
6941	9.2e-05
6942	9.7e-05
6943	8.9e-05
6944	8e-05
6945	6.9e-05
6946	7e-05
6947	7.8e-05
6948	7.4e-05
6949	6.9e-05
6950	7e-05
6951	6.6e-05
6952	6.7e-05
6953	6.5e-05
6954	6e-05
6955	5.8e-05
6956	5.4e-05
6957	4.2e-05
6958	4.5e-05
6959	3.9e-05
6960	2.6e-05
6961	1.2e-05
6962	2e-05
6963	4.5e-05
6964	5.6e-05
6965	4.9e-05
6966	3.5e-05
6967	1.9e-05
6968	2.2e-05
6969	3.1e-05
6970	2.7e-05
6971	1.5e-05
6972	2.7e-05
6973	4.4e-05
6974	5.7e-05
6975	3.3e-05
6976	3.3e-05
6977	3e-05
6978	2.7e-05
6979	1.5e-05
6980	2.5e-05
6981	3.6e-05
6982	3.8e-05
6983	3.9e-05
6984	4.8e-05
6985	6.8e-05
6986	7.5e-05
6987	7.7e-05
6988	8.3e-05
6989	8.4e-05
6990	7.9e-05
6991	7.3e-05
6992	7e-05
6993	6.4e-05
6994	6.7e-05
6995	7.1e-05
6996	8.3e-05
6997	9.2e-05
6998	8.9e-05
6999	9e-05
7000	7.9e-05
7001	7.1e-05
7002	6.8e-05
7003	6e-05
7004	5.8e-05
7005	7.4e-05
7006	8.9e-05
7007	9e-05
7008	8.6e-05
7009	9.2e-05
7010	9.6e-05
7011	0.000104
7012	0.0001
7013	9.6e-05
7014	9.2e-05
7015	0.000104
7016	0.000107
7017	0.000104
7018	0.000111
7019	0.000115
7020	0.000111
7021	9.6e-05
7022	9.6e-05
7023	0.000108
7024	0.00011
7025	9.9e-05
7026	9.7e-05
7027	0.000102
7028	0.000109
7029	0.000115
7030	0.000122
7031	0.000129
7032	0.000117
7033	0.00012
7034	0.00012
7035	0.000125
7036	0.000116
7037	0.000103
7038	9.8e-05
7039	0.000102
7040	0.000109
7041	0.000117
7042	0.000105
7043	9.3e-05
7044	0.000112
7045	0.000119
7046	9.5e-05
7047	7.9e-05
7048	8.6e-05
7049	9.7e-05
7050	0.000111
7051	0.000103
7052	8.5e-05
7053	8.6e-05
7054	8.7e-05
7055	0.0001
7056	0.0001
7057	0.000104
7058	0.000111
7059	0.00012
7060	0.000111
7061	0.000108
7062	0.000104
7063	9e-05
7064	9.9e-05
7065	0.000113
7066	0.000124
7067	0.000119
7068	0.000115
7069	0.000117
7070	0.000128
7071	0.000135
7072	0.000134
7073	0.000129
7074	0.000131
7075	0.000138
7076	0.000139
7077	0.000132
7078	0.000124
7079	0.000124
7080	0.000136
7081	0.000141
7082	0.000136
7083	0.000141
7084	0.000141
7085	0.000148
7086	0.000163
7087	0.000165
7088	0.000157
7089	0.000143
7090	0.000137
7091	0.000146
7092	0.000155
7093	0.000147
7094	0.00014
7095	0.00015
7096	0.000148
7097	0.000152
7098	0.000161
7099	0.00016
7100	0.000143
7101	0.000129
7102	0.000132
7103	0.000134
7104	0.000132
7105	0.000131
7106	0.000125
7107	0.00013
7108	0.00014
7109	0.00015
7110	0.00016
7111	0.000155
7112	0.000159
7113	0.000177
7114	0.000188
7115	0.00018
7116	0.000176
7117	0.000165
7118	0.000163
7119	0.000165
7120	0.000173
7121	0.000171
7122	0.000177
7123	0.000176
7124	0.000178
7125	0.000171
7126	0.000155
7127	0.000152
7128	0.000164
7129	0.00017
7130	0.000164
7131	0.000151
7132	0.000148
7133	0.000157
7134	0.000162
7135	0.000155
7136	0.000151
7137	0.000154
7138	0.000156
7139	0.000162
7140	0.000155
7141	0.00014
7142	0.000139
7143	0.000142
7144	0.00014
7145	0.000147
7146	0.000156
7147	0.000152
7148	0.000129
7149	0.000118
7150	0.000114
7151	0.000127
7152	0.000116
7153	0.000115
7154	0.000122
7155	0.000133
7156	0.000142
7157	0.000131
7158	0.000121
7159	0.000119
7160	0.000124
7161	0.00012
7162	0.00011
7163	0.0001
7164	9.8e-05
7165	0.000106
7166	0.000105
7167	0.000112
7168	0.000112
7169	9.7e-05
7170	8.2e-05
7171	8.6e-05
7172	8.4e-05
7173	8.3e-05
7174	8e-05
7175	8.9e-05
7176	0.000106
7177	0.000128
7178	0.000118
7179	9.6e-05
7180	8.7e-05
7181	9.4e-05
7182	9.1e-05
7183	8.2e-05
7184	7.1e-05
7185	6.7e-05
7186	7.8e-05
7187	9.8e-05
7188	9e-05
7189	7.6e-05
7190	7e-05
7191	7.9e-05
7192	8.7e-05
7193	9e-05
7194	8.5e-05
7195	7.9e-05
7196	7e-05
7197	7.1e-05
7198	8.5e-05
7199	9.8e-05
7200	9.5e-05
7201	0.000101
7202	9.8e-05
7203	9.7e-05
7204	8.9e-05
7205	8.4e-05
7206	7.5e-05
7207	7.8e-05
7208	8.8e-05
7209	9.8e-05
7210	9.3e-05
7211	8.6e-05
7212	8.5e-05
7213	9.2e-05
7214	0.00011
7215	0.000123
7216	0.000117
7217	0.000108
7218	0.000103
7219	0.000114
7220	0.000112
7221	0.000103
7222	9e-05
7223	9e-05
7224	9.5e-05
7225	0.000104
7226	0.000105
7227	0.000105
7228	0.000103
7229	0.000116
7230	0.000131
7231	0.000129
7232	0.000125
7233	0.000122
7234	0.000119
7235	0.000128
7236	0.00014
7237	0.000127
7238	0.000121
7239	0.000138
7240	0.000148
7241	0.000147
7242	0.000137
7243	0.000155
7244	0.000154
7245	0.000154
7246	0.000159
7247	0.00016
7248	0.000177
7249	0.000194
7250	0.000191
7251	0.00019
7252	0.000195
7253	0.0002
7254	0.0002
7255	0.000196
7256	0.000179
7257	0.000171
7258	0.000175
7259	0.000182
7260	0.000191
7261	0.000212
7262	0.000219
7263	0.000202
7264	0.000194
7265	0.000183
7266	0.000169
7267	0.000179
7268	0.000196
7269	0.000205
7270	0.000206
7271	0.000209
7272	0.000206
7273	0.000206
7274	0.000206
7275	0.00021
7276	0.00021
7277	0.000199
7278	0.000194
7279	0.000182
7280	0.00018
7281	0.000178
7282	0.000187
7283	0.000205
7284	0.000206
7285	0.000194
7286	0.000189
7287	0.000185
7288	0.000181
7289	0.000184
7290	0.000182
7291	0.000179
7292	0.00019
7293	0.000205
7294	0.000198
7295	0.000191
7296	0.00019
7297	0.000188
7298	0.000184
7299	0.000181
7300	0.000188
7301	0.000184
7302	0.000186
7303	0.000196
7304	0.000209
7305	0.000216
7306	0.000199
7307	0.000191
7308	0.000187
7309	0.000188
7310	0.000203
7311	0.000207
7312	0.000195
7313	0.000181
7314	0.000184
7315	0.000202
7316	0.000191
7317	0.00018
7318	0.000186
7319	0.00019
7320	0.000183
7321	0.000181
7322	0.000179
7323	0.000182
7324	0.000183
7325	0.000188
7326	0.000182
7327	0.000168
7328	0.00016
7329	0.000157
7330	0.000161
7331	0.000174
7332	0.00016
7333	0.000146
7334	0.000142
7335	0.000152
7336	0.000161
7337	0.000151
7338	0.000138
7339	0.000143
7340	0.000149
7341	0.000149
7342	0.000147
7343	0.00015
7344	0.000146
7345	0.00015
7346	0.000157
7347	0.000156
7348	0.00014
7349	0.000141
7350	0.000142
7351	0.000146
7352	0.000146
7353	0.000145
7354	0.000144
7355	0.000149
7356	0.000144
7357	0.000139
7358	0.000145
7359	0.000143
7360	0.000134
7361	0.000133
7362	0.000141
7363	0.000146
7364	0.000144
7365	0.000137
7366	0.000127
7367	0.000135
7368	0.00014
7369	0.000149
7370	0.000143
7371	0.00013
7372	0.000131
7373	0.000147
7374	0.000157
7375	0.000157
7376	0.000144
7377	0.000139
7378	0.000134
7379	0.000134
7380	0.00014
7381	0.000136
7382	0.000136
7383	0.000122
7384	0.000124
7385	0.000129
7386	0.000118
7387	0.000108
7388	0.0001
7389	0.000104
7390	0.000104
7391	0.000105
7392	0.00011
7393	0.0001
7394	0.000101
7395	0.00011
7396	0.000107
7397	0.000107
7398	9.4e-05
7399	8.6e-05
7400	9.3e-05
7401	0.0001
7402	9.6e-05
7403	8.1e-05
7404	8e-05
7405	8e-05
7406	9.2e-05
7407	0.000103
7408	8.7e-05
7409	8e-05
7410	8.5e-05
7411	9e-05
7412	8.9e-05
7413	8.7e-05
7414	7.4e-05
7415	7.6e-05
7416	8e-05
7417	9.4e-05
7418	9.4e-05
7419	9.4e-05
7420	0.0001
7421	0.000106
7422	0.000104
7423	9.9e-05
7424	0.000102
7425	0.000108
7426	8.7e-05
7427	8.1e-05
7428	8.3e-05
7429	9.1e-05
7430	0.000104
7431	0.000115
7432	0.000113
7433	0.000114
7434	0.000114
7435	0.000109
7436	9e-05
7437	9.5e-05
7438	0.0001
7439	0.000116
7440	0.000117
7441	0.000136
7442	0.000146
7443	0.000154
7444	0.000148
7445	0.000147
7446	0.000141
7447	0.000141
7448	0.000142
7449	0.000156
7450	0.00017
7451	0.000187
7452	0.000196
7453	0.000205
7454	0.000209
7455	0.0002
7456	0.000198
7457	0.000189
7458	0.000195
7459	0.000205
7460	0.000203
7461	0.000196
7462	0.000202
7463	0.000215
7464	0.000238
7465	0.000232
7466	0.000231
7467	0.000227
7468	0.000229
7469	0.000231
7470	0.000223
7471	0.000231
7472	0.000237
7473	0.000245
7474	0.000248
7475	0.00025
7476	0.000257
7477	0.000261
7478	0.000258
7479	0.00025
7480	0.000252
7481	0.00025
7482	0.000243
7483	0.00024
7484	0.000236
7485	0.000234
7486	0.000236
7487	0.000253
7488	0.000277
7489	0.000283
7490	0.000271
7491	0.000258
7492	0.000245
7493	0.000232
7494	0.000236
7495	0.00025
7496	0.000255
7497	0.000254
7498	0.000261
7499	0.00026
7500	0.000251
7501	0.000252
7502	0.000251
7503	0.000245
7504	0.000242
7505	0.000249
7506	0.000252
7507	0.000259
7508	0.000255
7509	0.000261
7510	0.000258
7511	0.000235
7512	0.000242
7513	0.000244
7514	0.000247
7515	0.000238
7516	0.000245
7517	0.00026
7518	0.000271
7519	0.000274
7520	0.00026
7521	0.000259
7522	0.000268
7523	0.000266
7524	0.000266
7525	0.000262
7526	0.000256
7527	0.000256
7528	0.000249
7529	0.000243
7530	0.000226
7531	0.000228
7532	0.000229
7533	0.000225
7534	0.000214
7535	0.000206
7536	0.000204
7537	0.000205
7538	0.000205
7539	0.000204
7540	0.000198
7541	0.000188
7542	0.00019
7543	0.0002
7544	0.000209
7545	0.0002
7546	0.000194
7547	0.00019
7548	0.000185
7549	0.000191
7550	0.000186
7551	0.000199
7552	0.000199
7553	0.000186
7554	0.000186
7555	0.000191
7556	0.000178
7557	0.000163
7558	0.000166
7559	0.000175
7560	0.000163
7561	0.00016
7562	0.00016
7563	0.000154
7564	0.000156
7565	0.000159
7566	0.00017
7567	0.000158
7568	0.00015
7569	0.00015
7570	0.000152
7571	0.000154
7572	0.000152
7573	0.000143
7574	0.000122
7575	0.000121
7576	0.000136
7577	0.00014
7578	0.000131
7579	0.00012
7580	0.000119
7581	9.8e-05
7582	9e-05
7583	9.8e-05
7584	0.000102
7585	8.6e-05
7586	9.9e-05
7587	0.000125
7588	0.000121
7589	0.000108
7590	9.7e-05
7591	9.4e-05
7592	8.2e-05
7593	7.5e-05
7594	8.4e-05
7595	9.3e-05
7596	9.1e-05
7597	9.7e-05
7598	9.5e-05
7599	9.1e-05
7600	8.9e-05
7601	0.0001
7602	0.000112
7603	0.000121
7604	0.000117
7605	0.0001
7606	9e-05
7607	8.9e-05
7608	9e-05
7609	8.8e-05
7610	8.4e-05
7611	8.7e-05
7612	9.4e-05
7613	0.000101
7614	0.000112
7615	0.000116
7616	0.000117
7617	0.000119
7618	9.7e-05
7619	7.9e-05
7620	8.8e-05
7621	9.2e-05
7622	8.3e-05
7623	9.1e-05
7624	0.000112
7625	0.000109
7626	0.0001
7627	0.000104
7628	0.000109
7629	0.000108
7630	0.00011
7631	0.000112
7632	0.000121
7633	0.000131
7634	0.000141
7635	0.000151
7636	0.000147
7637	0.000143
7638	0.000135
7639	0.000139
7640	0.000151
7641	0.000155
7642	0.000151
7643	0.000144
7644	0.000144
7645	0.00016
7646	0.000172
7647	0.000171
7648	0.000169
7649	0.000175
7650	0.000169
7651	0.000163
7652	0.000165
7653	0.000174
7654	0.000178
7655	0.000176
7656	0.00018
7657	0.000187
7658	0.000182
7659	0.000184
7660	0.000169
7661	0.000175
7662	0.000166
7663	0.000159
7664	0.000167
7665	0.000184
7666	0.000188
7667	0.000179
7668	0.000183
7669	0.000188
7670	0.000187
7671	0.000189
7672	0.000176
7673	0.00016
7674	0.000158
7675	0.00018
7676	0.000177
7677	0.00017
7678	0.000165
7679	0.00016
7680	0.000169
7681	0.000171
7682	0.000168
7683	0.000167
7684	0.000177
7685	0.000177
7686	0.000174
7687	0.000177
7688	0.000175
7689	0.000167
7690	0.000171
7691	0.000175
7692	0.000168
7693	0.000169
7694	0.000153
7695	0.000139
7696	0.000152
7697	0.000152
7698	0.000159
7699	0.000164
7700	0.00014
7701	0.000157
7702	0.000156
7703	0.000158
7704	0.000159
7705	0.000163
7706	0.000151
7707	0.000146
7708	0.000133
7709	0.000141
7710	0.000141
7711	0.00013
7712	0.000127
7713	0.000124
7714	0.000126
7715	0.000118
7716	0.00011
7717	0.000112
7718	0.000126
7719	0.000134
7720	0.000126
7721	0.000104
7722	9.4e-05
7723	9.3e-05
7724	9.5e-05
7725	9.8e-05
7726	9.9e-05
7727	9.9e-05
7728	9.9e-05
7729	0.000106
7730	0.000109
7731	0.000122
7732	0.000121
7733	0.000103
7734	0.000102
7735	0.000112
7736	0.00012
7737	0.000112
7738	9.7e-05
7739	9.2e-05
7740	8.3e-05
7741	9.6e-05
7742	9.5e-05
7743	8.6e-05
7744	8.8e-05
7745	0.000109
7746	0.000106
7747	9.2e-05
7748	8.3e-05
7749	8.1e-05
7750	7.9e-05
7751	8.7e-05
7752	9.1e-05
7753	9.4e-05
7754	8.8e-05
7755	8.2e-05
7756	9.2e-05
7757	9.9e-05
7758	0.000101
7759	0.000107
7760	0.00011
7761	0.000114
7762	0.000119
7763	0.000122
7764	0.000117
7765	0.000116
7766	0.000114
7767	0.000111
7768	0.000126
7769	0.000133
7770	0.000139
7771	0.000146
7772	0.000148
7773	0.000153
7774	0.000164
7775	0.000165
7776	0.000162
7777	0.000158
7778	0.00015
7779	0.000144
7780	0.00015
7781	0.000164
7782	0.000184
7783	0.0002
7784	0.000196
7785	0.000197
7786	0.000191
7787	0.000185
7788	0.000178
7789	0.000175
7790	0.000181
7791	0.000171
7792	0.000178
7793	0.000179
7794	0.000181
7795	0.000189
7796	0.000184
7797	0.000171
7798	0.000158
7799	0.00015
7800	0.00016
7801	0.000167
7802	0.000179
7803	0.000182
7804	0.000187
7805	0.000183
7806	0.00018
7807	0.000178
7808	0.00018
7809	0.000182
7810	0.000178
7811	0.000179
7812	0.000188
7813	0.000192
7814	0.000187
7815	0.000185
7816	0.000184
7817	0.000187
7818	0.000176
7819	0.000169
7820	0.000172
7821	0.000173
7822	0.000149
7823	0.000142
7824	0.000149
7825	0.000148
7826	0.000152
7827	0.000176
7828	0.000174
7829	0.000162
7830	0.000156
7831	0.000165
7832	0.00017
7833	0.000161
7834	0.000149
7835	0.000161
7836	0.000175
7837	0.000187
7838	0.000162
7839	0.000146
7840	0.000134
7841	0.000146
7842	0.000151
7843	0.000155
7844	0.000161
7845	0.000165
7846	0.000169
7847	0.000183
7848	0.000186
7849	0.000174
7850	0.000164
7851	0.000167
7852	0.000171
7853	0.000176
7854	0.000174
7855	0.000171
7856	0.000169
7857	0.000172
7858	0.000171
7859	0.000175
7860	0.000173
7861	0.000167
7862	0.000164
7863	0.000178
7864	0.000179
7865	0.000179
7866	0.000174
7867	0.00017
7868	0.000172
7869	0.000177
7870	0.000167
7871	0.000164
7872	0.000163
7873	0.000161
7874	0.000168
7875	0.000176
7876	0.000175
7877	0.00017
7878	0.000169
7879	0.00018
7880	0.000181
7881	0.000158
7882	0.000142
7883	0.000166
7884	0.000194
7885	0.000207
7886	0.000204
7887	0.000207
7888	0.000209
7889	0.000201
7890	0.000203
7891	0.000211
7892	0.000215
7893	0.000205
7894	0.000198
7895	0.000198
7896	0.000196
7897	0.000199
7898	0.000206
7899	0.000216
7900	0.000222
7901	0.000227
7902	0.000231
7903	0.000233
7904	0.000227
7905	0.000214
7906	0.000209
7907	0.000213
7908	0.000203
7909	0.000213
7910	0.000216
7911	0.000222
7912	0.000208
7913	0.000193
7914	0.000195
7915	0.000196
7916	0.000193
7917	0.000198
7918	0.000205
7919	0.000204
7920	0.000203
7921	0.00021
7922	0.000208
7923	0.000206
7924	0.000204
7925	0.000211
7926	0.000203
7927	0.000207
7928	0.000201
7929	0.000186
7930	0.000193
7931	0.000202
7932	0.000206
7933	0.000202
7934	0.000201
7935	0.000187
7936	0.000176
7937	0.000165
7938	0.00017
7939	0.000165
7940	0.000165
7941	0.000164
7942	0.000169
7943	0.000178
7944	0.000182
7945	0.00018
7946	0.000172
7947	0.000163
7948	0.000162
7949	0.000186
7950	0.000189
7951	0.000168
7952	0.000155
7953	0.000164
7954	0.000166
7955	0.000156
7956	0.000157
7957	0.000164
7958	0.000159
7959	0.000151
7960	0.000166
7961	0.000176
7962	0.000169
7963	0.000171
7964	0.000188
7965	0.000189
7966	0.000172
7967	0.000169
7968	0.000164
7969	0.000163
7970	0.00017
7971	0.000169
7972	0.000157
7973	0.000148
7974	0.000149
7975	0.000158
7976	0.000164
7977	0.000178
7978	0.000179
7979	0.000162
7980	0.000143
7981	0.000135
7982	0.000134
7983	0.000136
7984	0.000133
7985	0.00016
7986	0.00017
7987	0.000167
7988	0.000158
7989	0.000162
7990	0.000155
7991	0.000151
7992	0.000147
7993	0.000151
7994	0.000149
7995	0.000149
7996	0.000159
7997	0.000173
7998	0.000186
[truncated: 4,001 more rows]

## Sheet: Q372dC - dimer oligomer - SEC 2
Time	UV
6000	0.001264
6001	0.00127
6002	0.001281
6003	0.00129
6004	0.001304
6005	0.001291
6006	0.001288
6007	0.001289
6008	0.001272
6009	0.001277
6010	0.001292
6011	0.001308
6012	0.001321
6013	0.001341
6014	0.001341
6015	0.001342
6016	0.001331
6017	0.001335
6018	0.001333
6019	0.00133
6020	0.001332
6021	0.00133
6022	0.001335
6023	0.001343
6024	0.001352
6025	0.001358
6026	0.001377
6027	0.001375
6028	0.001352
6029	0.001335
6030	0.001334
6031	0.001343
6032	0.00135
6033	0.001347
6034	0.001333
6035	0.00134
6036	0.001347
6037	0.001345
6038	0.001347
6039	0.001335
6040	0.001338
6041	0.001352
6042	0.001362
6043	0.001352
6044	0.001337
6045	0.001333
6046	0.001345
6047	0.001359
6048	0.001362
6049	0.001341
6050	0.00133
6051	0.001325
6052	0.00134
6053	0.001348
6054	0.001343
6055	0.001351
6056	0.001361
6057	0.001359
6058	0.001356
6059	0.001355
6060	0.001354
6061	0.001356
6062	0.00136
6063	0.001361
6064	0.001353
6065	0.001348
6066	0.001345
6067	0.001349
6068	0.001356
6069	0.001355
6070	0.001351
6071	0.001345
6072	0.001353
6073	0.00136
6074	0.001366
6075	0.001364
6076	0.001365
6077	0.001362
6078	0.001352
6079	0.001333
6080	0.001333
6081	0.001329
6082	0.001324
6083	0.001315
6084	0.001314
6085	0.001316
6086	0.00131
6087	0.001302
6088	0.001301
6089	0.0013
6090	0.001318
6091	0.001316
6092	0.001304
6093	0.001295
6094	0.001293
6095	0.001292
6096	0.00128
6097	0.001279
6098	0.001278
6099	0.001278
6100	0.001274
6101	0.001272
6102	0.001279
6103	0.001278
6104	0.001278
6105	0.001277
6106	0.001262
6107	0.001269
6108	0.001278
6109	0.001265
6110	0.001265
6111	0.001261
6112	0.001239
6113	0.001232
6114	0.001242
6115	0.001269
6116	0.001281
6117	0.001282
6118	0.001278
6119	0.001276
6120	0.001281
6121	0.001293
6122	0.001285
6123	0.001284
6124	0.00129
6125	0.001283
6126	0.00129
6127	0.001291
6128	0.00129
6129	0.001287
6130	0.001289
6131	0.001301
6132	0.001304
6133	0.001289
6134	0.001279
6135	0.001279
6136	0.001281
6137	0.001281
6138	0.001276
6139	0.001277
6140	0.001296
6141	0.001323
6142	0.001335
6143	0.001341
6144	0.001347
6145	0.00134
6146	0.00133
6147	0.00133
6148	0.001332
6149	0.001325
6150	0.001339
6151	0.00136
6152	0.00138
6153	0.001388
6154	0.001384
6155	0.001366
6156	0.001359
6157	0.001355
6158	0.001349
6159	0.001359
6160	0.001363
6161	0.001362
6162	0.001371
6163	0.001367
6164	0.00136
6165	0.001353
6166	0.001359
6167	0.00137
6168	0.001371
6169	0.00136
6170	0.001355
6171	0.00135
6172	0.001364
6173	0.001376
6174	0.001379
6175	0.001374
6176	0.00135
6177	0.001343
6178	0.001344
6179	0.001341
6180	0.001331
6181	0.001344
6182	0.001346
6183	0.001353
6184	0.001355
6185	0.001355
6186	0.001364
6187	0.001369
6188	0.001354
6189	0.001342
6190	0.001344
6191	0.001349
6192	0.001353
6193	0.001353
6194	0.001362
6195	0.001364
6196	0.001362
6197	0.001352
6198	0.001352
6199	0.001343
6200	0.001336
6201	0.001331
6202	0.00134
6203	0.001347
6204	0.001345
6205	0.001348
6206	0.001348
6207	0.001365
6208	0.001357
6209	0.001357
6210	0.001346
6211	0.001339
6212	0.001331
6213	0.001322
6214	0.001313
6215	0.00132
6216	0.001328
6217	0.001339
6218	0.001339
6219	0.001335
6220	0.001335
6221	0.001332
6222	0.001339
6223	0.001341
6224	0.001332
6225	0.001332
6226	0.001338
6227	0.001342
6228	0.001326
6229	0.001323
6230	0.001328
6231	0.001342
6232	0.001338
6233	0.001336
6234	0.001315
6235	0.001308
6236	0.001309
6237	0.001318
6238	0.00133
6239	0
6240	3e-06
6241	2e-05
6242	5.9e-05
6243	9e-05
6244	7.2e-05
6245	5.2e-05
6246	4e-05
6247	4.5e-05
6248	6.3e-05
6249	6.9e-05
6250	6.1e-05
6251	5.1e-05
6252	5.2e-05
6253	5.6e-05
6254	5.7e-05
6255	6e-05
6256	6.3e-05
6257	6.6e-05
6258	5.9e-05
6259	4.9e-05
6260	6.1e-05
6261	6.7e-05
6262	5.5e-05
6263	4.6e-05
6264	5.1e-05
6265	6.1e-05
6266	5.4e-05
6267	4.5e-05
6268	3.2e-05
6269	3.4e-05
6270	3.8e-05
6271	3.6e-05
6272	3.6e-05
6273	4.3e-05
6274	3.9e-05
6275	4.8e-05
6276	5.5e-05
6277	4.4e-05
6278	4.4e-05
6279	5.4e-05
6280	4.5e-05
6281	3.1e-05
6282	3e-05
6283	2.7e-05
6284	2.3e-05
6285	2.3e-05
6286	3.3e-05
6287	3.9e-05
6288	4.7e-05
6289	5.4e-05
6290	5.8e-05
6291	6.3e-05
6292	6.2e-05
6293	6.1e-05
6294	5.8e-05
6295	5.4e-05
6296	5.8e-05
6297	6.2e-05
6298	5.6e-05
6299	5.7e-05
6300	7.1e-05
6301	7.6e-05
6302	7.5e-05
6303	6.1e-05
6304	5.6e-05
6305	6.3e-05
6306	7.9e-05
6307	8.7e-05
6308	8.9e-05
6309	9.8e-05
6310	0.000105
6311	0.000105
6312	0.000116
6313	0.000124
6314	0.000127
6315	0.000116
6316	0.000111
6317	0.000119
6318	0.000123
6319	0.000111
6320	0.00012
6321	0.000133
6322	0.000126
6323	0.00013
6324	0.000131
6325	0.000111
6326	9.7e-05
6327	0.000105
6328	0.000115
6329	0.000116
6330	0.00012
6331	0.000131
6332	0.000131
6333	0.000127
6334	0.00014
6335	0.00014
6336	0.000128
6337	0.000117
6338	0.000121
6339	0.00013
6340	0.000115
6341	0.000102
6342	0.000106
6343	0.000112
6344	0.000113
6345	0.000117
6346	0.000116
6347	0.00012
6348	0.000127
6349	0.000125
6350	0.000113
6351	0.000106
6352	0.000109
6353	0.000116
6354	0.000124
6355	0.000119
6356	0.000117
6357	0.0001
6358	9.5e-05
6359	9.7e-05
6360	0.000114
6361	0.000131
6362	0.000126
6363	0.000116
6364	0.00011
6365	0.000119
6366	0.000131
6367	0.000138
6368	0.000119
6369	0.000107
6370	0.000113
6371	0.000122
6372	0.000125
6373	0.000113
6374	0.000115
6375	0.000113
6376	0.000121
6377	0.000119
6378	0.000111
6379	0.000109
6380	0.000105
6381	0.000115
6382	0.000111
6383	0.000107
6384	0.000103
6385	0.00011
6386	0.00012
6387	0.000109
6388	8.5e-05
6389	8e-05
6390	8.2e-05
6391	8.9e-05
6392	9.3e-05
6393	8.2e-05
6394	6.5e-05
6395	6.6e-05
6396	8e-05
6397	8.7e-05
6398	7.8e-05
6399	6.9e-05
6400	5.5e-05
6401	5.8e-05
6402	6.5e-05
6403	6.1e-05
6404	3.7e-05
6405	2.2e-05
6406	2.6e-05
6407	3.6e-05
6408	3.8e-05
6409	4.7e-05
6410	5.6e-05
6411	4.7e-05
6412	4.1e-05
6413	4.9e-05
6414	4.3e-05
6415	3.5e-05
6416	3.6e-05
6417	5.5e-05
6418	5.7e-05
6419	4.4e-05
6420	3.1e-05
6421	2.8e-05
6422	1.6e-05
6423	1.6e-05
6424	1.3e-05
6425	1.4e-05
6426	2e-06
6427	7e-06
6428	1.6e-05
6429	3.4e-05
6430	3.5e-05
6431	3.8e-05
6432	3.4e-05
6433	2.3e-05
6434	1.3e-05
6435	2e-05
6436	3.1e-05
6437	3.4e-05
6438	3.3e-05
6439	2.7e-05
6440	3.2e-05
6441	4e-05
6442	4.4e-05
6443	4e-05
6444	4.1e-05
6445	3.7e-05
6446	2.5e-05
6447	8e-06
6448	1.2e-05
6449	2.5e-05
6450	3.9e-05
6451	6.2e-05
6452	5.6e-05
6453	4.1e-05
6454	4.5e-05
6455	5.9e-05
6456	5.6e-05
6457	5.5e-05
6458	6.2e-05
6459	7e-05
6460	7.6e-05
6461	7.7e-05
6462	6.9e-05
6463	6.9e-05
6464	8.9e-05
6465	9.7e-05
6466	9.7e-05
6467	8.6e-05
6468	7.9e-05
6469	7.5e-05
6470	7.2e-05
6471	7.8e-05
6472	9.2e-05
6473	9.7e-05
6474	7.7e-05
6475	6.4e-05
6476	7.4e-05
6477	8.6e-05
6478	8.8e-05
6479	8e-05
6480	8.4e-05
6481	8.7e-05
6482	7.4e-05
6483	7.2e-05
6484	8.6e-05
6485	9.1e-05
6486	9e-05
6487	8.3e-05
6488	8.5e-05
6489	0.000105
6490	0.000107
6491	0.000116
6492	0.000115
6493	0.000115
6494	0.000111
6495	0.00011
6496	0.000101
6497	0.000113
6498	0.000119
6499	0.000112
6500	9.9e-05
6501	8.3e-05
6502	7.9e-05
6503	8.7e-05
6504	9.9e-05
6505	0.000103
6506	9.7e-05
6507	0.000102
6508	0.000109
6509	0.00012
6510	0.000118
6511	0.000115
6512	0.000116
6513	0.000117
6514	0.000117
6515	0.000115
6516	0.000109
6517	9.3e-05
6518	9.6e-05
6519	9.6e-05
6520	0.000103
6521	9.8e-05
6522	8.9e-05
6523	8.8e-05
6524	9.7e-05
6525	9.3e-05
6526	0.000102
6527	0.00012
6528	0.000115
6529	0.0001
6530	9.8e-05
6531	8.9e-05
6532	7.4e-05
6533	7.3e-05
6534	7.8e-05
6535	7.2e-05
6536	6.4e-05
6537	7.8e-05
6538	7.6e-05
6539	5.8e-05
6540	5e-05
6541	4.7e-05
6542	4.6e-05
6543	3.7e-05
6544	3.4e-05
6545	4.2e-05
6546	4.7e-05
6547	5e-05
6548	4.7e-05
6549	4.9e-05
6550	4.8e-05
6551	4.2e-05
6552	4.4e-05
6553	4.3e-05
6554	2e-05
6555	1.4e-05
6556	1.7e-05
6557	2.6e-05
6558	2.9e-05
6559	2.2e-05
6560	1.2e-05
6561	1.4e-05
6562	2.2e-05
6563	2.4e-05
6564	1.2e-05
6565	4e-06
6566	-1.1e-05
6567	-7e-06
6568	1.2e-05
6569	2.3e-05
6570	1.2e-05
6571	8e-06
6572	8e-06
6573	9e-06
6574	-1e-06
6575	-8e-06
6576	-3e-06
6577	3e-06
6578	1e-05
6579	1.3e-05
6580	1.1e-05
6581	-1.1e-05
6582	-1.2e-05
6583	5e-06
6584	7e-06
6585	-6e-06
6586	-1.6e-05
6587	-2.4e-05
6588	-2.2e-05
6589	-1e-05
6590	2e-06
6591	-9e-06
6592	-2.1e-05
6593	-1.8e-05
6594	-3e-06
6595	1.3e-05
6596	8e-06
6597	3e-06
6598	4e-06
6599	1.6e-05
6600	2.5e-05
6601	2e-05
6602	2e-05
6603	2.5e-05
6604	3.4e-05
6605	2.8e-05
6606	2e-05
6607	3.4e-05
6608	4.7e-05
6609	6.7e-05
6610	7.6e-05
6611	8.7e-05
6612	9.6e-05
6613	9e-05
6614	8.6e-05
6615	9.3e-05
6616	8.9e-05
6617	7.7e-05
6618	8.3e-05
6619	9.4e-05
6620	0.000101
6621	0.000105
6622	0.000114
6623	0.000103
6624	9.2e-05
6625	9.1e-05
6626	9.7e-05
6627	0.000109
6628	0.000117
6629	0.000128
6630	0.000128
6631	0.000124
6632	0.000127
6633	0.000131
6634	0.000124
6635	0.00012
6636	0.000126
6637	0.000131
6638	0.000135
6639	0.00014
6640	0.000147
6641	0.000148
6642	0.000153
6643	0.000157
6644	0.000156
6645	0.000155
6646	0.000158
6647	0.000157
6648	0.000155
6649	0.000151
6650	0.000154
6651	0.000153
6652	0.000154
6653	0.000151
6654	0.000166
6655	0.000168
6656	0.000169
6657	0.000165
6658	0.000157
6659	0.000148
6660	0.00014
6661	0.000139
6662	0.000155
6663	0.000173
6664	0.000162
6665	0.00016
6666	0.00015
6667	0.000139
6668	0.000142
6669	0.000143
6670	0.000145
6671	0.000148
6672	0.000144
6673	0.000138
6674	0.000134
6675	0.000128
6676	0.000126
6677	0.000114
6678	0.000107
6679	0.000118
6680	0.000121
6681	0.000114
6682	0.000112
6683	0.000109
6684	0.000112
6685	9.3e-05
6686	9.8e-05
6687	9.9e-05
6688	8.2e-05
6689	8.8e-05
6690	9.1e-05
6691	9.5e-05
6692	7.8e-05
6693	6.7e-05
6694	8e-05
6695	8.5e-05
6696	8.3e-05
6697	8.4e-05
6698	7.9e-05
6699	8.7e-05
6700	9.6e-05
6701	8.8e-05
6702	8e-05
6703	6.7e-05
6704	6.3e-05
6705	6.6e-05
6706	7.6e-05
6707	8.2e-05
6708	8.7e-05
6709	8.2e-05
6710	8.3e-05
6711	8.8e-05
6712	0.000101
6713	0.000104
6714	7.1e-05
6715	5.6e-05
6716	6e-05
6717	6.4e-05
6718	8.1e-05
6719	8.8e-05
6720	8.3e-05
6721	6.7e-05
6722	6.5e-05
6723	6.7e-05
6724	6.1e-05
6725	3.7e-05
6726	3e-05
6727	3.2e-05
6728	4.1e-05
6729	4.8e-05
6730	4.5e-05
6731	5.3e-05
6732	6.8e-05
6733	6.9e-05
6734	5.7e-05
6735	4.8e-05
6736	3.8e-05
6737	3.4e-05
6738	2.9e-05
6739	3.3e-05
6740	1.1e-05
6741	1.3e-05
6742	1.8e-05
6743	2.2e-05
6744	2.2e-05
6745	2.7e-05
6746	1.8e-05
6747	8e-06
6748	1.1e-05
6749	9e-06
6750	7e-06
6751	3e-06
6752	-1.6e-05
6753	-2.2e-05
6754	-1.7e-05
6755	-1.7e-05
6756	-1.8e-05
6757	-2e-05
6758	-2.2e-05
6759	-1.3e-05
6760	3e-06
6761	-1e-06
6762	-1.3e-05
6763	-2.7e-05
6764	-3.2e-05
6765	-2.7e-05
6766	-3.5e-05
6767	-3.5e-05
6768	-3.5e-05
6769	-3.3e-05
6770	-3.7e-05
6771	-4e-05
6772	-4.1e-05
6773	-5.1e-05
6774	-4.9e-05
6775	-4.8e-05
6776	-3.7e-05
6777	-2.8e-05
6778	-2.7e-05
6779	-2.6e-05
6780	-1.5e-05
6781	4e-06
6782	1.2e-05
6783	7e-06
6784	-7e-06
6785	-5e-06
6786	4e-06
6787	1.8e-05
6788	1.4e-05
6789	1.5e-05
6790	1.9e-05
6791	2.5e-05
6792	2.5e-05
6793	2.5e-05
6794	2e-05
6795	3.1e-05
6796	3.8e-05
6797	3.1e-05
6798	3e-05
6799	4.1e-05
6800	4.7e-05
6801	5.2e-05
6802	6.6e-05
6803	7.8e-05
6804	5.9e-05
6805	4.4e-05
6806	4.9e-05
6807	5.5e-05
6808	5.9e-05
6809	6.2e-05
6810	5.6e-05
6811	5.6e-05
6812	7.4e-05
6813	9.2e-05
6814	0.000102
6815	9.3e-05
6816	7.7e-05
6817	6.8e-05
6818	8.7e-05
6819	9.9e-05
6820	0.000105
6821	9.9e-05
6822	0.000103
6823	0.000108
6824	0.000105
6825	0.000106
6826	0.000113
6827	0.000118
6828	0.000106
6829	8.2e-05
6830	8.2e-05
6831	7.7e-05
6832	7.7e-05
6833	8.5e-05
6834	9.7e-05
6835	9.7e-05
6836	0.000104
6837	0.000104
6838	0.00011
6839	0.0001
6840	8.7e-05
6841	7.4e-05
6842	7.5e-05
6843	8.3e-05
6844	8.4e-05
6845	9.3e-05
6846	9.5e-05
6847	9.9e-05
6848	9.3e-05
6849	9.5e-05
6850	8.9e-05
6851	9.3e-05
6852	9e-05
6853	7.8e-05
6854	7.2e-05
6855	8.1e-05
6856	8.6e-05
6857	7.7e-05
6858	7.7e-05
6859	8.2e-05
6860	9.2e-05
6861	9.4e-05
6862	8.8e-05
6863	9.3e-05
6864	8.4e-05
6865	7.4e-05
6866	7.3e-05
6867	8.6e-05
6868	7.9e-05
6869	8e-05
6870	8.8e-05
6871	7.9e-05
6872	6.7e-05
6873	5.9e-05
6874	6.3e-05
6875	7.7e-05
6876	8.8e-05
6877	8.1e-05
6878	7.8e-05
6879	6.7e-05
6880	5.8e-05
6881	5.7e-05
6882	5.9e-05
6883	6.3e-05
6884	5.6e-05
6885	4.9e-05
6886	5.2e-05
6887	6e-05
6888	5.7e-05
6889	5.6e-05
6890	6.7e-05
6891	6e-05
6892	4e-05
6893	4.4e-05
6894	4.7e-05
6895	3.6e-05
6896	2.7e-05
6897	3.5e-05
6898	4e-05
6899	3.6e-05
6900	3.5e-05
6901	3.2e-05
6902	3.7e-05
6903	3.9e-05
6904	3.5e-05
6905	2.5e-05
6906	3e-05
6907	3.5e-05
6908	3.9e-05
6909	3.6e-05
6910	4.4e-05
6911	4.5e-05
6912	3.8e-05
6913	2.7e-05
6914	1.5e-05
6915	2e-05
6916	3e-05
6917	5e-05
6918	5.1e-05
6919	5.1e-05
6920	3.6e-05
6921	3e-05
6922	1e-05
6923	0
6924	6e-06
6925	1.8e-05
6926	1.9e-05
6927	1.5e-05
6928	1.9e-05
6929	3.1e-05
6930	4.8e-05
6931	3.5e-05
6932	2.4e-05
6933	3.1e-05
6934	4e-05
6935	4.8e-05
6936	5.7e-05
6937	4.6e-05
6938	5.4e-05
6939	7.1e-05
6940	8.9e-05
6941	8.4e-05
6942	7.2e-05
6943	8.5e-05
6944	9.3e-05
6945	8.1e-05
6946	7.1e-05
6947	0.000103
6948	0.000113
6949	0.000116
6950	0.000118
6951	0.000114
6952	0.000116
6953	0.000127
6954	0.000128
6955	0.000108
6956	0.000118
6957	0.000128
6958	0.000119
6959	0.0001
6960	9.6e-05
6961	0.000109
6962	0.000114
6963	0.00011
6964	9.7e-05
6965	0.000107
6966	0.00011
6967	0.000107
6968	0.000101
6969	9.9e-05
6970	0.000108
6971	0.000108
6972	0.0001
6973	0.0001
6974	0.000115
6975	0.000112
6976	9.6e-05
6977	9.1e-05
6978	9.5e-05
6979	7.9e-05
6980	8.1e-05
6981	9.3e-05
6982	9.5e-05
6983	0.000111
6984	0.000116
6985	0.00011
6986	9.1e-05
6987	7.8e-05
6988	8.4e-05
6989	9.5e-05
6990	9.8e-05
6991	8.8e-05
6992	8.2e-05
6993	7.7e-05
6994	8.8e-05
6995	9e-05
6996	9.4e-05
6997	9.5e-05
6998	9.3e-05
6999	9e-05
7000	7.7e-05
7001	7.9e-05
7002	6.9e-05
7003	6.7e-05
7004	7.5e-05
7005	8.9e-05
7006	8.6e-05
7007	6.8e-05
7008	5.4e-05
7009	6.6e-05
7010	7e-05
7011	6.5e-05
7012	5.4e-05
7013	4.7e-05
7014	5.8e-05
7015	5.9e-05
7016	4.9e-05
7017	3.9e-05
7018	3.8e-05
7019	3.9e-05
7020	4.5e-05
7021	5.4e-05
7022	4.2e-05
7023	3.1e-05
7024	3.5e-05
7025	4.3e-05
7026	4.5e-05
7027	4.1e-05
7028	4.6e-05
7029	4.3e-05
7030	6.1e-05
7031	5.7e-05
7032	4.8e-05
7033	3.1e-05
7034	2.9e-05
7035	2.7e-05
7036	3.9e-05
7037	4.5e-05
7038	4.1e-05
7039	4.1e-05
7040	3.7e-05
7041	3.3e-05
7042	3.8e-05
7043	3e-05
7044	1.6e-05
7045	5e-06
7046	1e-05
7047	1.3e-05
7048	1.5e-05
7049	5e-06
7050	1e-05
7051	2.1e-05
7052	2.8e-05
7053	3.1e-05
7054	2.5e-05
7055	1.2e-05
7056	1e-06
7057	2.5e-05
7058	3.5e-05
7059	3.1e-05
7060	1.8e-05
7061	2.1e-05
7062	4.1e-05
7063	5.6e-05
7064	5.6e-05
7065	3.6e-05
7066	3.2e-05
7067	3.9e-05
7068	4.8e-05
7069	5.4e-05
7070	5.2e-05
7071	4.8e-05
7072	5.7e-05
7073	6e-05
7074	6.1e-05
7075	6.7e-05
7076	6.3e-05
7077	5.7e-05
7078	5e-05
7079	6e-05
7080	6.6e-05
7081	6e-05
7082	6.3e-05
7083	6.9e-05
7084	9.5e-05
7085	9.6e-05
7086	7.1e-05
7087	7e-05
7088	9.2e-05
7089	0.000108
7090	0.000115
7091	0.000114
7092	0.000103
7093	0.000102
7094	0.000111
7095	0.000126
7096	0.000127
7097	0.000112
7098	0.000108
7099	0.000108
7100	0.000105
7101	0.000118
7102	0.000133
7103	0.000133
7104	0.000131
7105	0.000136
7106	0.000146
7107	0.000155
7108	0.000144
7109	0.000147
7110	0.000157
7111	0.000153
7112	0.000145
7113	0.00013
7114	0.000132
7115	0.000126
7116	0.000133
7117	0.000137
7118	0.000136
7119	0.000131
7120	0.000119
7121	0.000122
7122	0.00013
7123	0.000138
7124	0.000138
7125	0.000137
7126	0.000132
7127	0.000135
7128	0.000142
7129	0.000137
7130	0.000118
7131	0.000119
7132	0.000133
7133	0.000138
7134	0.000113
7135	9.7e-05
7136	9.5e-05
7137	0.000106
7138	0.000107
7139	9.8e-05
7140	9.7e-05
7141	0.00012
7142	0.000136
7143	0.000137
7144	0.000137
7145	0.000157
7146	0.000155
7147	0.000154
7148	0.000152
7149	0.000149
7150	0.000141
7151	0.000138
7152	0.000137
7153	0.000135
7154	0.000123
7155	0.00012
7156	0.000118
7157	0.000127
7158	0.00013
7159	0.000138
7160	0.000134
7161	0.000138
7162	0.000122
7163	0.000124
7164	0.000114
7165	0.000113
7166	0.000119
7167	0.00013
7168	0.000134
7169	0.00012
7170	0.000116
7171	0.000123
7172	0.000129
7173	0.000125
7174	0.000122
7175	0.00012
7176	0.000103
7177	8.6e-05
7178	9e-05
7179	9.4e-05
7180	9.5e-05
7181	8.6e-05
7182	8e-05
7183	8.3e-05
7184	9.2e-05
7185	9.7e-05
7186	0.000105
7187	0.000111
7188	0.000114
7189	0.000113
7190	0.000109
7191	0.000109
7192	0.000108
7193	9.8e-05
7194	0.0001
7195	9.9e-05
7196	0.000116
7197	0.000114
7198	0.0001
7199	9e-05
7200	9.9e-05
7201	0.000103
7202	0.000106
7203	0.000102
7204	0.000109
7205	0.000106
7206	0.000103
7207	9.1e-05
7208	8.7e-05
7209	8.2e-05
7210	8.2e-05
7211	8.2e-05
7212	8.4e-05
7213	7.2e-05
7214	5.3e-05
7215	6.4e-05
7216	8.8e-05
7217	9.7e-05
7218	9.2e-05
7219	0.0001
7220	9.6e-05
7221	9.2e-05
7222	7.4e-05
7223	7.1e-05
7224	8.4e-05
7225	9.1e-05
7226	9.7e-05
7227	8.8e-05
7228	9.1e-05
7229	9.5e-05
7230	9.3e-05
7231	8.6e-05
7232	9.1e-05
7233	8e-05
7234	6.9e-05
7235	6e-05
7236	6.2e-05
7237	6.6e-05
7238	7.3e-05
7239	7.5e-05
7240	7.6e-05
7241	7.2e-05
7242	8e-05
7243	0.000106
7244	0.000116
7245	0.000101
7246	9.8e-05
7247	0.000112
7248	0.000122
7249	0.000114
7250	0.000108
7251	0.000109
7252	9.2e-05
7253	8.5e-05
7254	0.000102
7255	0.000114
7256	0.000111
7257	0.000104
7258	0.000113
7259	0.00012
7260	0.000126
7261	0.000127
7262	0.000121
7263	0.000112
7264	0.000101
7265	9.6e-05
7266	0.0001
7267	0.000112
7268	0.000112
7269	0.000114
7270	0.000115
7271	0.000126
7272	0.00013
7273	0.000119
7274	0.000108
7275	0.000114
7276	0.000127
7277	0.000129
7278	0.000124
7279	0.00011
7280	0.000109
7281	0.00012
7282	0.00012
7283	0.000117
7284	0.000104
7285	0.000105
7286	0.000104
7287	0.000109
7288	0.00011
7289	0.000104
7290	0.000108
7291	0.000111
7292	0.000121
7293	0.000117
7294	9.2e-05
7295	9.5e-05
7296	9.9e-05
7297	9.5e-05
7298	9.3e-05
7299	9e-05
7300	8.7e-05
7301	9.1e-05
7302	9.1e-05
7303	8.8e-05
7304	7.2e-05
7305	6.4e-05
7306	6.2e-05
7307	5e-05
7308	5.4e-05
7309	6.7e-05
7310	7e-05
7311	7.5e-05
7312	8e-05
7313	8e-05
7314	6.4e-05
7315	5.8e-05
7316	6.1e-05
7317	6e-05
7318	6.5e-05
7319	6.9e-05
7320	7.7e-05
7321	7e-05
7322	7.7e-05
7323	9.1e-05
7324	8.9e-05
7325	8.1e-05
7326	8e-05
7327	7.4e-05
7328	6.5e-05
7329	7.3e-05
7330	6.5e-05
7331	5.2e-05
7332	5.7e-05
7333	7.5e-05
7334	7.1e-05
7335	7.5e-05
7336	7.9e-05
7337	7.8e-05
7338	7.2e-05
7339	7.5e-05
7340	6.4e-05
7341	6e-05
7342	6.7e-05
7343	7.8e-05
7344	9.1e-05
7345	8.7e-05
7346	8.4e-05
7347	6.8e-05
7348	5.8e-05
7349	5e-05
7350	4.7e-05
7351	5.5e-05
7352	5.2e-05
7353	4.4e-05
7354	3.8e-05
7355	4.6e-05
7356	5.7e-05
7357	5.2e-05
7358	6.2e-05
7359	6.6e-05
7360	6.1e-05
7361	5.7e-05
7362	4.2e-05
7363	4.1e-05
7364	4.2e-05
7365	4.8e-05
7366	5.3e-05
7367	6.8e-05
7368	7.8e-05
7369	6.6e-05
7370	6.2e-05
7371	4.7e-05
7372	4e-05
7373	3.7e-05
7374	3.6e-05
7375	3.4e-05
7376	4e-05
7377	5.1e-05
7378	6.5e-05
7379	7.4e-05
7380	8.3e-05
7381	7.7e-05
7382	8.7e-05
7383	7.5e-05
7384	6.8e-05
7385	7.5e-05
7386	9.3e-05
7387	0.000104
7388	0.00012
7389	0.000116
7390	0.000104
7391	0.000104
7392	0.000112
7393	0.000109
7394	0.000109
7395	0.000109
7396	0.000117
7397	0.000119
7398	0.000124
7399	0.000113
7400	0.000104
7401	0.000101
7402	0.000105
7403	0.000104
7404	0.000112
7405	0.000103
7406	9.2e-05
7407	0.000101
7408	0.000123
7409	0.000123
7410	0.000119
7411	0.000107
7412	0.000105
7413	9.4e-05
7414	0.000105
7415	0.000115
7416	0.000105
7417	0.000115
7418	0.000125
7419	0.000126
7420	0.000121
7421	0.000115
7422	0.000111
7423	0.00011
7424	0.000107
7425	0.0001
7426	0.000103
7427	0.000105
7428	9.4e-05
7429	9.5e-05
7430	0.00011
7431	0.000108
7432	0.000107
7433	0.000101
7434	0.000104
7435	0.000115
7436	0.000122
7437	0.000123
7438	0.000122
7439	0.000129
7440	0.000116
7441	0.000107
7442	0.000104
7443	0.000102
7444	8.8e-05
7445	9.6e-05
7446	9.8e-05
7447	8.7e-05
7448	8.1e-05
7449	9.5e-05
7450	0.000113
7451	0.000127
7452	0.000121
7453	0.00011
7454	8.5e-05
7455	7.3e-05
7456	7.7e-05
7457	9e-05
7458	9.6e-05
7459	7.3e-05
7460	8e-05
7461	9.3e-05
7462	0.000103
7463	0.000107
7464	8.4e-05
7465	6.6e-05
7466	6e-05
7467	6.5e-05
7468	6.4e-05
7469	6.1e-05
7470	6.7e-05
7471	8.1e-05
7472	8.9e-05
7473	9.9e-05
7474	8.6e-05
7475	0.000101
7476	9.7e-05
7477	8.8e-05
7478	7e-05
7479	5.9e-05
7480	4.9e-05
7481	5.6e-05
7482	6.3e-05
7483	6.2e-05
7484	7e-05
7485	7.9e-05
7486	8.9e-05
7487	9.1e-05
7488	8.5e-05
7489	7.7e-05
7490	0.000101
7491	0.000119
7492	0.000113
7493	0.000111
7494	0.000128
7495	0.00013
7496	0.000128
7497	0.000112
7498	0.000105
7499	0.00011
7500	0.000122
7501	0.000127
7502	0.000128
7503	0.000138
7504	0.000142
7505	0.000141
7506	0.000147
7507	0.000147
7508	0.000145
7509	0.000143
7510	0.000156
7511	0.000164
7512	0.000158
7513	0.000138
7514	0.000149
7515	0.00017
7516	0.000156
7517	0.000145
7518	0.000153
7519	0.000173
7520	0.000178
7521	0.000171
7522	0.000173
7523	0.00018
7524	0.000169
7525	0.000168
7526	0.00017
7527	0.000172
7528	0.000182
7529	0.000198
7530	0.000199
7531	0.000202
7532	0.000204
7533	0.000199
7534	0.000194
7535	0.000192
7536	0.000184
7537	0.000182
7538	0.00018
7539	0.00019
7540	0.000193
7541	0.000203
7542	0.000197
7543	0.000184
7544	0.000174
7545	0.000174
7546	0.000174
7547	0.000184
7548	0.000177
7549	0.000175
7550	0.000169
7551	0.000169
7552	0.000173
7553	0.000187
7554	0.000196
7555	0.000194
7556	0.000194
7557	0.000208
7558	0.000214
7559	0.000216
7560	0.000215
7561	0.000223
7562	0.000211
7563	0.00021
7564	0.000216
7565	0.000207
7566	0.0002
7567	0.000207
7568	0.000217
7569	0.000197
7570	0.000189
7571	0.000196
7572	0.000207
7573	0.000214
7574	0.000217
7575	0.000207
7576	0.000208
7577	0.000211
7578	0.00021
7579	0.000209
7580	0.000209
7581	0.000193
7582	0.000188
7583	0.000186
7584	0.00018
7585	0.000188
7586	0.000202
7587	0.000198
7588	0.000183
7589	0.000188
7590	0.000191
7591	0.000201
7592	0.000205
7593	0.000187
7594	0.000177
7595	0.000171
7596	0.000161
7597	0.000158
7598	0.000165
7599	0.000168
7600	0.000158
7601	0.000152
7602	0.000135
7603	0.000136
7604	0.000144
7605	0.00015
7606	0.000158
7607	0.000159
7608	0.000148
7609	0.000146
7610	0.000155
7611	0.000164
7612	0.000167
7613	0.000163
7614	0.000145
7615	0.000129
7616	0.000127
7617	0.000131
7618	0.000136
7619	0.00013
7620	0.000127
7621	0.000129
7622	0.000124
7623	0.000129
7624	0.000129
7625	0.000129
7626	0.000137
7627	0.000126
7628	0.000118
7629	9.6e-05
7630	8.5e-05
7631	8.9e-05
7632	0.000117
7633	0.000118
7634	0.00011
7635	0.000105
7636	9.7e-05
7637	0.000102
7638	0.000105
7639	0.000103
7640	0.0001
7641	0.000108
7642	0.000104
7643	0.000105
7644	0.0001
7645	9.7e-05
7646	9.2e-05
7647	8.6e-05
7648	8.1e-05
7649	8.6e-05
7650	9.5e-05
7651	0.000117
7652	0.000116
7653	0.00011
7654	0.000115
7655	0.000109
7656	0.000111
7657	0.000112
7658	0.000122
7659	0.00012
7660	0.00012
7661	0.000103
7662	0.000107
7663	0.000121
7664	0.000136
7665	0.000139
7666	0.000137
7667	0.00014
7668	0.00015
7669	0.000152
7670	0.000149
7671	0.000141
7672	0.000141
7673	0.000137
7674	0.00014
7675	0.000155
7676	0.000156
7677	0.000163
7678	0.00017
7679	0.000169
7680	0.000162
7681	0.000157
7682	0.000148
7683	0.000152
7684	0.000167
7685	0.000179
7686	0.000177
7687	0.000159
7688	0.000165
7689	0.000169
7690	0.000163
7691	0.000166
7692	0.000173
7693	0.000161
7694	0.000148
7695	0.000155
7696	0.000169
7697	0.000166
7698	0.000165
7699	0.000159
7700	0.000165
7701	0.000178
7702	0.000175
7703	0.000163
7704	0.000164
7705	0.000165
7706	0.000177
7707	0.000173
7708	0.000181
7709	0.000178
7710	0.000166
7711	0.000161
7712	0.000157
7713	0.000148
7714	0.000148
7715	0.000158
7716	0.00017
7717	0.000175
7718	0.000163
7719	0.00017
7720	0.000172
7721	0.00017
7722	0.000177
7723	0.000189
7724	0.000184
7725	0.000165
7726	0.000161
7727	0.000153
7728	0.000155
7729	0.000158
7730	0.00016
7731	0.000165
7732	0.000168
7733	0.000172
7734	0.000177
7735	0.000181
7736	0.000177
7737	0.000183
7738	0.000189
7739	0.000183
7740	0.000172
7741	0.000176
7742	0.000185
7743	0.000183
7744	0.000175
7745	0.000172
7746	0.000168
7747	0.000174
7748	0.000191
7749	0.000214
7750	0.000214
7751	0.0002
7752	0.00019
7753	0.000181
7754	0.000175
7755	0.000171
7756	0.000178
7757	0.000185
7758	0.000187
7759	0.000206
7760	0.000216
7761	0.000205
7762	0.000177
7763	0.000158
7764	0.00016
7765	0.000168
7766	0.000166
7767	0.000158
7768	0.00016
7769	0.000174
7770	0.000177
7771	0.000178
7772	0.000173
7773	0.000171
7774	0.000168
7775	0.000173
7776	0.000162
7777	0.000147
7778	0.000154
7779	0.000166
7780	0.000184
7781	0.000189
7782	0.000177
7783	0.000166
7784	0.000162
7785	0.000165
7786	0.000163
7787	0.00016
7788	0.000157
7789	0.000156
7790	0.000158
7791	0.000168
7792	0.00018
7793	0.000178
7794	0.000162
7795	0.000155
7796	0.00015
7797	0.000153
7798	0.000162
7799	0.000169
7800	0.000166
7801	0.000164
7802	0.000184
7803	0.000176
7804	0.000164
7805	0.000151
7806	0.000153
7807	0.000156
7808	0.000156
7809	0.000145
7810	0.000138
7811	0.000139
7812	0.000143
7813	0.000158
7814	0.000155
7815	0.000138
7816	0.000141
7817	0.000136
7818	0.000128
7819	0.000145
7820	0.000157
7821	0.000163
7822	0.000155
7823	0.000148
7824	0.000148
7825	0.000145
7826	0.000144
7827	0.000143
7828	0.000143
7829	0.000153
7830	0.000163
7831	0.000157
7832	0.000136
7833	0.000134
7834	0.000142
7835	0.000147
7836	0.00015
7837	0.000145
7838	0.000136
7839	0.000141
7840	0.000143
7841	0.000145
7842	0.000133
7843	0.000132
7844	0.000139
7845	0.000149
7846	0.000156
7847	0.000149
7848	0.00014
7849	0.000138
7850	0.000148
7851	0.000148
7852	0.00013
7853	0.000119
7854	0.000118
7855	0.000124
7856	0.000125
7857	0.00012
7858	0.000122
7859	0.000121
7860	0.000126
7861	0.000126
7862	0.000117
7863	0.000114
7864	0.000103
7865	0.00012
7866	0.000139
7867	0.000145
7868	0.000129
7869	0.00012
7870	0.000137
7871	0.000146
7872	0.000163
7873	0.000161
7874	0.000148
7875	0.000145
7876	0.000145
7877	0.000146
7878	0.000151
7879	0.000139
7880	0.000126
7881	0.000143
7882	0.000147
7883	0.000141
7884	0.000131
7885	0.000129
7886	0.000137
7887	0.000153
7888	0.000173
7889	0.000181
7890	0.000172
7891	0.000161
7892	0.000172
7893	0.000178
7894	0.000184
7895	0.00018
7896	0.000168
7897	0.000182
7898	0.000184
7899	0.000172
7900	0.000171
7901	0.000173
7902	0.00016
7903	0.000167
7904	0.000187
7905	0.000183
7906	0.000171
7907	0.000176
7908	0.000194
7909	0.00019
7910	0.000176
7911	0.000172
7912	0.000177
7913	0.000185
7914	0.000193
7915	0.000202
7916	0.000204
7917	0.000214
7918	0.000217
7919	0.000212
7920	0.000201
7921	0.000194
7922	0.000205
7923	0.000205
7924	0.0002
7925	0.000208
7926	0.000215
7927	0.000204
7928	0.000199
7929	0.000219
7930	0.000236
7931	0.000241
7932	0.00024
7933	0.000229
7934	0.000219
7935	0.00022
7936	0.00022
7937	0.000213
7938	0.000222
7939	0.000238
7940	0.000254
7941	0.000262
7942	0.000252
7943	0.000243
7944	0.000241
7945	0.000245
7946	0.000245
7947	0.00024
7948	0.000229
7949	0.000243
7950	0.000266
7951	0.000282
7952	0.000277
7953	0.00026
7954	0.000255
7955	0.000259
7956	0.000255
7957	0.000256
7958	0.00026
7959	0.000247
7960	0.00024
7961	0.000251
7962	0.000273
7963	0.000284
7964	0.000269
7965	0.000269
7966	0.000266
7967	0.000253
7968	0.000256
7969	0.000257
7970	0.000264
7971	0.000258
7972	0.00027
7973	0.000266
7974	0.000264
7975	0.000268
7976	0.000272
7977	0.00027
7978	0.000271
7979	0.000269
7980	0.000277
7981	0.000271
7982	0.000267
7983	0.00027
7984	0.000273
7985	0.000282
7986	0.000269
7987	0.000264
7988	0.00027
7989	0.000268
7990	0.000262
7991	0.000258
7992	0.000248
7993	0.000249
7994	0.00026
7995	0.000261
7996	0.000257
7997	0.000244
7998	0.000244
[truncated: 3,659 more rows]

## Sheet: Q372dC - monomer - SEC 2
Time	UV
6000	0.000611
6001	0.000613
6002	0.000617
6003	0.000625
6004	0.000619
6005	0.000631
6006	0.000649
6007	0.000647
6008	0.000632
6009	0.000615
6010	0.000615
6011	0.000606
6012	0.000597
6013	0.000604
6014	0.000611
6015	0.000614
6016	0.000615
6017	0.000618
6018	0.000621
6019	0.000631
6020	0.000627
6021	0.000621
6022	0.000621
6023	0.000608
6024	0.000599
6025	0.000608
6026	0.00061
6027	0.000611
6028	0.000605
6029	0.000596
6030	0.000602
6031	0.000612
6032	0.000627
6033	0.000626
6034	0.000616
6035	0.000595
6036	0.000586
6037	0.000583
6038	0.000591
6039	0.000593
6040	0.000587
6041	0.000585
6042	0.000598
6043	0.000599
6044	0.000596
6045	0.000584
6046	0.000587
6047	0.0006
6048	0.0006
6049	0.000582
6050	0.000575
6051	0.000573
6052	0.000572
6053	0.000577
6054	0.000588
6055	0.000591
6056	0.000585
6057	0.000585
6058	0.000589
6059	0.000594
6060	0.000591
6061	0.00058
6062	0.000585
6063	0.000587
6064	0.000591
6065	0.000599
6066	0.000606
6067	0.000613
6068	0.000608
6069	0.00061
6070	0.000611
6071	0.000606
6072	0.000599
6073	0.000589
6074	0.000575
6075	0.000584
6076	0.000586
6077	0.000579
6078	0.000582
6079	0.000595
6080	0.000599
6081	0.000591
6082	0.000582
6083	0.000569
6084	0.000577
6085	0.000577
6086	0.000574
6087	0.000572
6088	0.000566
6089	0.000566
6090	0.000572
6091	0.000565
6092	0.000557
6093	0.000548
6094	0.000545
6095	0.000545
6096	0.000546
6097	0.00054
6098	0.000533
6099	0.000544
6100	0.000556
6101	0.000544
6102	0.000542
6103	0.000539
6104	0.000537
6105	0.000535
6106	0.000536
6107	0.000534
6108	0.000527
6109	0.000544
6110	0.000556
6111	0.000557
6112	0.000549
6113	0.00054
6114	0.000536
6115	0.000542
6116	0.000527
6117	0.000521
6118	0.000524
6119	0.000529
6120	0.000522
6121	0.000525
6122	0.000528
6123	0.000532
6124	0.000535
6125	0.000546
6126	0.000545
6127	0.000527
6128	0.000523
6129	0.000536
6130	0.000533
6131	0.000526
6132	0.000535
6133	0.00055
6134	0.000559
6135	0.000557
6136	0.000547
6137	0.000545
6138	0.000542
6139	0.000548
6140	0.000568
6141	0.000575
6142	0.000587
6143	0.000579
6144	0.00058
6145	0.000579
6146	0.000577
6147	0.00059
6148	0.000597
6149	0.000596
6150	0.000598
6151	0.000603
6152	0.000599
6153	0.000604
6154	0.000616
6155	0.000623
6156	0.000623
6157	0.000601
6158	0.000598
6159	0.000606
6160	0.000619
6161	0.000623
6162	0.000622
6163	0.000628
6164	0.000641
6165	0.00065
6166	0.000651
6167	0.000643
6168	0.000631
6169	0.000631
6170	0.000638
6171	0.000643
6172	0.000646
6173	0.000646
6174	0.00065
6175	0.000654
6176	0.000661
6177	0.000657
6178	0.000659
6179	0.000657
6180	0.000669
6181	0.000666
6182	0.000672
6183	0.000666
6184	0.000667
6185	0.000669
6186	0.000671
6187	0.000662
6188	0.000659
6189	0.000662
6190	0.00066
6191	0.000655
6192	0.000651
6193	0.000649
6194	0.000648
6195	0.000652
6196	0.000659
6197	0.000662
6198	0.000658
6199	0.000634
6200	0.000626
6201	0.00063
6202	0.000641
6203	0.000645
6204	0.000641
6205	0.000639
6206	0.000642
6207	0.000653
6208	0.000655
6209	0.000651
6210	0.000641
6211	0.00064
6212	0.000637
6213	0.000645
6214	0.000644
6215	0.000623
6216	0.000629
6217	0.000652
6218	0.000675
6219	0.000676
6220	0.00068
6221	0.000682
6222	0.000672
6223	0.00067
6224	0.000668
6225	0.000673
6226	0.000656
6227	0.000656
6228	0.000656
6229	0.000661
6230	0.000667
6231	0.000656
6232	0.000656
6233	0.000657
6234	0.000657
6235	0.000649
6236	0.000647
6237	0.000657
6238	0.000654
6239	0.000653
6240	0
6241	6e-06
6242	2.1e-05
6243	3.9e-05
6244	3.7e-05
6245	3.6e-05
6246	3.7e-05
6247	4.6e-05
6248	4.5e-05
6249	5.3e-05
6250	6.4e-05
6251	5.3e-05
6252	4.4e-05
6253	4.3e-05
6254	3.3e-05
6255	2.3e-05
6256	2.8e-05
6257	2.2e-05
6258	8e-06
6259	1.1e-05
6260	1.7e-05
6261	2.8e-05
6262	4.3e-05
6263	3.3e-05
6264	1.1e-05
6265	6e-06
6266	2.2e-05
6267	2.5e-05
6268	2.2e-05
6269	2.3e-05
6270	1.9e-05
6271	1.7e-05
6272	1.3e-05
6273	9e-06
6274	-1e-06
6275	-1e-06
6276	1e-05
6277	3e-06
6278	-2e-06
6279	-2.1e-05
6280	-1.3e-05
6281	6e-06
6282	1.7e-05
6283	2.8e-05
6284	3.2e-05
6285	3.2e-05
6286	1.8e-05
6287	1.3e-05
6288	1.4e-05
6289	1.3e-05
6290	-1e-06
6291	-4e-06
6292	1e-05
6293	2.3e-05
6294	1.8e-05
6295	1.7e-05
6296	2.5e-05
6297	2.6e-05
6298	2.2e-05
6299	2.9e-05
6300	3.4e-05
6301	3e-05
6302	3.3e-05
6303	5.1e-05
6304	5.3e-05
6305	5.2e-05
6306	5.4e-05
6307	5.7e-05
6308	5.3e-05
6309	3.5e-05
6310	2.2e-05
6311	2.2e-05
6312	2.5e-05
6313	3.6e-05
6314	4.2e-05
6315	4.8e-05
6316	5.6e-05
6317	7e-05
6318	7.2e-05
6319	6.3e-05
6320	5e-05
6321	4.6e-05
6322	3.6e-05
6323	2.4e-05
6324	3.9e-05
6325	5.3e-05
6326	5.3e-05
6327	4.9e-05
6328	5.4e-05
6329	5.5e-05
6330	5.9e-05
6331	5.3e-05
6332	3.5e-05
6333	1.8e-05
6334	2.1e-05
6335	3.7e-05
6336	4.2e-05
6337	4.4e-05
6338	4.5e-05
6339	4.6e-05
6340	5.2e-05
6341	5.4e-05
6342	4.7e-05
6343	3.7e-05
6344	4.9e-05
6345	4.1e-05
6346	3.7e-05
6347	3.1e-05
6348	2.1e-05
6349	1.7e-05
6350	2.4e-05
6351	1.8e-05
6352	-1e-06
6353	-6e-06
6354	-5e-06
6355	6e-06
6356	1.7e-05
6357	1.8e-05
6358	1.3e-05
6359	2e-06
6360	-6e-06
6361	3e-06
6362	5e-06
6363	6e-06
6364	5e-06
6365	1e-06
6366	1.1e-05
6367	1.7e-05
6368	1.9e-05
6369	8e-06
6370	1.1e-05
6371	0
6372	2e-06
6373	6e-06
6374	7e-06
6375	8e-06
6376	1.7e-05
6377	1.5e-05
6378	1.9e-05
6379	2e-05
6380	3.6e-05
6381	2.2e-05
6382	0
6383	8e-06
6384	2.6e-05
6385	2.6e-05
6386	1.5e-05
6387	2.3e-05
6388	4e-05
6389	3.9e-05
6390	2.9e-05
6391	1.3e-05
6392	8e-06
6393	5e-06
6394	0
6395	9e-06
6396	2e-06
6397	-4e-06
6398	-4e-06
6399	2e-05
6400	3.2e-05
6401	2.8e-05
6402	2.1e-05
6403	1.2e-05
6404	2.2e-05
6405	2.4e-05
6406	3.3e-05
6407	4.1e-05
6408	4.1e-05
6409	3.5e-05
6410	3.6e-05
6411	4.5e-05
6412	3.7e-05
6413	1.9e-05
6414	2.5e-05
6415	3.1e-05
6416	3.1e-05
6417	3.1e-05
6418	3.7e-05
6419	4e-05
6420	4.4e-05
6421	4e-05
6422	3.6e-05
6423	4.2e-05
6424	3.5e-05
6425	4.2e-05
6426	4.1e-05
6427	3.7e-05
6428	3.6e-05
6429	3.9e-05
6430	5.2e-05
6431	5.9e-05
6432	5.4e-05
6433	4.3e-05
6434	4.2e-05
6435	3.8e-05
6436	2.6e-05
6437	2.6e-05
6438	3.4e-05
6439	3.1e-05
6440	3.4e-05
6441	3.2e-05
6442	3.3e-05
6443	3.8e-05
6444	3.7e-05
6445	2.4e-05
6446	2.8e-05
6447	2.8e-05
6448	3.3e-05
6449	3.5e-05
6450	3.7e-05
6451	3.6e-05
6452	4.8e-05
6453	6.9e-05
6454	7.3e-05
6455	5.9e-05
6456	5.3e-05
6457	3.6e-05
6458	2.6e-05
6459	1.9e-05
6460	1.4e-05
6461	1.5e-05
6462	2.4e-05
6463	3.3e-05
6464	2.6e-05
6465	6e-06
6466	5e-06
6467	1.4e-05
6468	1e-05
6469	-4e-06
6470	-1.5e-05
6471	-2.1e-05
6472	-1.1e-05
6473	-1e-06
6474	6e-06
6475	1.6e-05
6476	1.4e-05
6477	0
6478	-9e-06
6479	-1.7e-05
6480	-2.3e-05
6481	-2e-05
6482	-2.7e-05
6483	-2.6e-05
6484	-2e-05
6485	-1.7e-05
6486	-1.7e-05
6487	-2e-05
6488	-2.9e-05
6489	-3.9e-05
6490	-5.7e-05
6491	-5.1e-05
6492	-4.4e-05
6493	-3.8e-05
6494	-4.3e-05
6495	-4.3e-05
6496	-3.3e-05
6497	-3.1e-05
6498	-2.7e-05
6499	-2.5e-05
6500	-2.6e-05
6501	-2.8e-05
6502	-3.1e-05
6503	-2.9e-05
6504	-2.5e-05
6505	-1.1e-05
6506	-4e-06
6507	6e-06
6508	0
6509	-8e-06
6510	-1.2e-05
6511	-6e-06
6512	4e-06
6513	2e-06
6514	-7e-06
6515	-1.2e-05
6516	-2.2e-05
6517	-1.8e-05
6518	1e-05
6519	2.4e-05
6520	2.1e-05
6521	1.1e-05
6522	7e-06
6523	1e-06
6524	-7e-06
6525	2e-06
6526	1.5e-05
6527	2.4e-05
6528	2.2e-05
6529	1.8e-05
6530	2.8e-05
6531	3.7e-05
6532	4.1e-05
6533	3.4e-05
6534	3.1e-05
6535	1.9e-05
6536	2.2e-05
6537	4e-05
6538	5.4e-05
6539	5.9e-05
6540	5.3e-05
6541	3.8e-05
6542	2.6e-05
6543	2.4e-05
6544	1.7e-05
6545	1.2e-05
6546	9e-06
6547	7e-06
6548	5e-06
6549	1.1e-05
6550	7e-06
6551	7e-06
6552	1.2e-05
6553	3.4e-05
6554	3.7e-05
6555	2.6e-05
6556	9e-06
6557	1.3e-05
6558	2.3e-05
6559	3.3e-05
6560	3.2e-05
6561	2.8e-05
6562	2.4e-05
6563	9e-06
6564	9e-06
6565	1.1e-05
6566	3e-06
6567	0
6568	3e-06
6569	1.1e-05
6570	1e-06
6571	-1e-06
6572	-8e-06
6573	3e-06
6574	-1e-06
6575	-2e-06
6576	-5e-06
6577	-1.1e-05
6578	-1.3e-05
6579	-7e-06
6580	1e-06
6581	2e-06
6582	-1e-05
6583	-2.1e-05
6584	-2.7e-05
6585	-2.9e-05
6586	-2.1e-05
6587	-2.3e-05
6588	-3.1e-05
6589	-3.2e-05
6590	-3.4e-05
6591	-3.5e-05
6592	-3.2e-05
6593	-3.1e-05
6594	-3.7e-05
6595	-4.2e-05
6596	-4.4e-05
6597	-5.4e-05
6598	-5.9e-05
6599	-5.5e-05
6600	-4e-05
6601	-3.4e-05
6602	-4.7e-05
6603	-6.4e-05
6604	-7.1e-05
6605	-7.9e-05
6606	-6.7e-05
6607	-6.8e-05
6608	-7.2e-05
6609	-7.4e-05
6610	-7.1e-05
6611	-6.6e-05
6612	-6.6e-05
6613	-6.8e-05
6614	-7.9e-05
6615	-8.9e-05
6616	-9.4e-05
6617	-8.7e-05
6618	-9e-05
6619	-9.2e-05
6620	-0.000104
6621	-0.000102
6622	-0.0001
6623	-8.2e-05
6624	-6.5e-05
6625	-8.1e-05
6626	-9.7e-05
6627	-9.8e-05
6628	-8.9e-05
6629	-8.3e-05
6630	-9.3e-05
6631	-0.000107
6632	-0.000106
6633	-9.5e-05
6634	-7.6e-05
6635	-7.6e-05
6636	-8.3e-05
6637	-0.000107
6638	-0.000105
6639	-0.000102
6640	-9.4e-05
6641	-9.4e-05
6642	-9.4e-05
6643	-9.8e-05
6644	-9e-05
6645	-7.5e-05
6646	-8.4e-05
6647	-8.1e-05
6648	-7.7e-05
6649	-9.6e-05
6650	-0.000103
6651	-0.000113
6652	-0.000108
6653	-0.000103
6654	-9.5e-05
6655	-8e-05
6656	-8.9e-05
6657	-9.9e-05
6658	-9.6e-05
6659	-0.0001
6660	-0.000103
6661	-0.0001
6662	-0.000108
6663	-0.000104
6664	-0.0001
6665	-9e-05
6666	-8.1e-05
6667	-7.6e-05
6668	-8e-05
6669	-8.6e-05
6670	-9.2e-05
6671	-8.9e-05
6672	-8.7e-05
6673	-8.9e-05
6674	-8.3e-05
6675	-7.8e-05
6676	-8.5e-05
6677	-8.2e-05
6678	-7.8e-05
6679	-8.1e-05
6680	-7.6e-05
6681	-6.7e-05
6682	-5.4e-05
6683	-5.8e-05
6684	-6e-05
6685	-6.4e-05
6686	-5.8e-05
6687	-5.9e-05
6688	-7.2e-05
6689	-6.7e-05
6690	-5.3e-05
6691	-5.1e-05
6692	-4.5e-05
6693	-4.3e-05
6694	-3.9e-05
6695	-3.2e-05
6696	-3e-05
6697	-3.5e-05
6698	-4e-05
6699	-2.7e-05
6700	-2.4e-05
6701	9e-06
6702	1.8e-05
6703	1.3e-05
6704	1.7e-05
6705	1.4e-05
6706	3e-06
6707	2e-06
6708	0
6709	-8e-06
6710	-2e-05
6711	-2.6e-05
6712	-7e-06
6713	2e-06
6714	1e-06
6715	-1.8e-05
6716	-1.9e-05
6717	-9e-06
6718	-1e-06
6719	-2e-06
6720	0
6721	0
6722	7e-06
6723	0
6724	-2e-06
6725	0
6726	-1e-06
6727	-1.6e-05
6728	-1e-06
6729	1.3e-05
6730	8e-06
6731	-9e-06
6732	-9e-06
6733	0
6734	1.2e-05
6735	2.3e-05
6736	9e-06
6737	2e-06
6738	9e-06
6739	3.6e-05
6740	4.2e-05
6741	3.4e-05
6742	2.4e-05
6743	1.7e-05
6744	3.1e-05
6745	2.9e-05
6746	3.6e-05
6747	3.7e-05
6748	4.2e-05
6749	4.3e-05
6750	4.8e-05
6751	5.1e-05
6752	4.6e-05
6753	2.3e-05
6754	2e-05
6755	2e-05
6756	2.2e-05
6757	3.6e-05
6758	4.2e-05
6759	4.9e-05
6760	4.9e-05
6761	4.6e-05
6762	4.4e-05
6763	4.5e-05
6764	5.1e-05
6765	3.9e-05
6766	3.2e-05
6767	2.7e-05
6768	3e-05
6769	3.6e-05
6770	2.7e-05
6771	2.4e-05
6772	3.7e-05
6773	4e-05
6774	3.8e-05
6775	2.4e-05
6776	2.2e-05
6777	1.8e-05
6778	1.8e-05
6779	1.3e-05
6780	2e-06
6781	6e-06
6782	2e-05
6783	2.7e-05
6784	3.3e-05
6785	2.9e-05
6786	2.4e-05
6787	1.9e-05
6788	2.1e-05
6789	5e-06
6790	-1e-05
6791	-8e-06
6792	0
6793	6e-06
6794	3e-06
6795	0
6796	5e-06
6797	1.1e-05
6798	1e-05
6799	0
6800	-7e-06
6801	-1.5e-05
6802	-2.5e-05
6803	-2.5e-05
6804	-5e-06
6805	2e-06
6806	-9e-06
6807	-1.9e-05
6808	-1.6e-05
6809	-1.3e-05
6810	-1.5e-05
6811	-1.5e-05
6812	-2.3e-05
6813	-2.6e-05
6814	-3.3e-05
6815	-3e-05
6816	-3.4e-05
6817	-4e-05
6818	-4.3e-05
6819	-4.1e-05
6820	-4.4e-05
6821	-5.7e-05
6822	-4.9e-05
6823	-3.6e-05
6824	-2.8e-05
6825	-1.3e-05
6826	-1.3e-05
6827	-2.2e-05
6828	-3.7e-05
6829	-2.6e-05
6830	-2.2e-05
6831	-2.3e-05
6832	-3.8e-05
6833	-3.4e-05
6834	-4.2e-05
6835	-4.8e-05
6836	-4.8e-05
6837	-5.1e-05
6838	-4.9e-05
6839	-3.7e-05
6840	-4.7e-05
6841	-6.2e-05
6842	-6.7e-05
6843	-5.8e-05
6844	-6.3e-05
6845	-5.9e-05
6846	-5.9e-05
6847	-4.9e-05
6848	-3.9e-05
6849	-4.5e-05
6850	-5.7e-05
6851	-4.6e-05
6852	-3.6e-05
6853	-4.4e-05
6854	-6e-05
6855	-6.2e-05
6856	-4.6e-05
6857	-4e-05
6858	-4.6e-05
6859	-6e-05
6860	-6.3e-05
6861	-5.6e-05
6862	-3.5e-05
6863	-2.9e-05
6864	-3.9e-05
6865	-3.9e-05
6866	-2.8e-05
6867	-2.8e-05
6868	-2.8e-05
6869	-2.7e-05
6870	-2.9e-05
6871	-2.9e-05
6872	-3.5e-05
6873	-4.3e-05
6874	-5.2e-05
6875	-4.5e-05
6876	-4.7e-05
6877	-5.3e-05
6878	-4.8e-05
6879	-4.8e-05
6880	-5.7e-05
6881	-6.2e-05
6882	-6.6e-05
6883	-6.7e-05
6884	-7e-05
6885	-5.6e-05
6886	-5.3e-05
6887	-5.6e-05
6888	-5.9e-05
6889	-6.2e-05
6890	-7e-05
6891	-7.8e-05
6892	-6.7e-05
6893	-6.4e-05
6894	-5e-05
6895	-4.6e-05
6896	-5e-05
6897	-5.4e-05
6898	-5.2e-05
6899	-6.1e-05
6900	-6.7e-05
6901	-7e-05
6902	-7.4e-05
6903	-8.2e-05
6904	-7.4e-05
6905	-6.4e-05
6906	-6e-05
6907	-7.8e-05
6908	-9.6e-05
6909	-9e-05
6910	-8.6e-05
6911	-9.2e-05
6912	-9.8e-05
6913	-0.000104
6914	-0.0001
6915	-9.9e-05
6916	-0.000107
6917	-0.000107
6918	-0.000114
6919	-0.000111
6920	-0.000109
6921	-8.8e-05
6922	-7.9e-05
6923	-8e-05
6924	-0.000101
6925	-0.000109
6926	-0.000101
6927	-0.000108
6928	-0.000114
6929	-0.00012
6930	-0.000127
6931	-0.000133
6932	-0.000125
6933	-0.000121
6934	-0.000128
6935	-0.000133
6936	-0.000135
6937	-0.000136
6938	-0.000136
6939	-0.000141
6940	-0.000147
6941	-0.000144
6942	-0.000139
6943	-0.000131
6944	-0.000134
6945	-0.000143
6946	-0.000156
6947	-0.000168
6948	-0.000169
6949	-0.000163
6950	-0.000159
6951	-0.00015
6952	-0.000145
6953	-0.000135
6954	-0.000133
6955	-0.000134
6956	-0.000127
6957	-0.000133
6958	-0.000146
6959	-0.000147
6960	-0.000154
6961	-0.000154
6962	-0.000163
6963	-0.000158
6964	-0.000148
6965	-0.000128
6966	-0.000142
6967	-0.000152
6968	-0.00015
6969	-0.000148
6970	-0.000148
6971	-0.000158
6972	-0.000159
6973	-0.000146
6974	-0.000137
6975	-0.000133
6976	-0.000147
6977	-0.000162
6978	-0.000154
6979	-0.000143
6980	-0.000137
6981	-0.000133
6982	-0.00014
6983	-0.000141
6984	-0.000134
6985	-0.000131
6986	-0.000138
6987	-0.000135
6988	-0.000125
6989	-0.000108
6990	-9.2e-05
6991	-0.000102
6992	-0.00011
6993	-0.000115
6994	-0.000114
6995	-9.8e-05
6996	-7.7e-05
6997	-7e-05
6998	-6.6e-05
6999	-7.6e-05
7000	-8.2e-05
7001	-9e-05
7002	-9.5e-05
7003	-9.1e-05
7004	-8.5e-05
7005	-8e-05
7006	-7.5e-05
7007	-7.2e-05
7008	-6.3e-05
7009	-5.7e-05
7010	-5.3e-05
7011	-5.8e-05
7012	-4.4e-05
7013	-2.9e-05
7014	-3e-05
7015	-3.7e-05
7016	-4.7e-05
7017	-3.5e-05
7018	-3.3e-05
7019	-3.3e-05
7020	-4.2e-05
7021	-2.9e-05
7022	-2.9e-05
7023	-2.5e-05
7024	-3e-05
7025	-4e-05
7026	-4.9e-05
7027	-3.8e-05
7028	-3.4e-05
7029	-4.4e-05
7030	-5.6e-05
7031	-3.7e-05
7032	-2.6e-05
7033	-2.4e-05
7034	-1.9e-05
7035	-2.8e-05
7036	-3.4e-05
7037	-3.8e-05
7038	-1.9e-05
7039	-1.1e-05
7040	-2.5e-05
7041	-3.3e-05
7042	-2.4e-05
7043	-2.7e-05
7044	-4.3e-05
7045	-4.5e-05
7046	-3.3e-05
7047	-3.7e-05
7048	-3.4e-05
7049	-3.2e-05
7050	-3.2e-05
7051	-3.9e-05
7052	-4.1e-05
7053	-4.1e-05
7054	-2.9e-05
7055	-2.4e-05
7056	-3.5e-05
7057	-3.7e-05
7058	-3.7e-05
7059	-4.1e-05
7060	-4.1e-05
7061	-3.8e-05
7062	-4e-05
7063	-3e-05
7064	-2.1e-05
7065	-2.8e-05
7066	-4.4e-05
7067	-6.2e-05
7068	-5.7e-05
7069	-4.1e-05
7070	-3.9e-05
7071	-5.5e-05
7072	-6.1e-05
7073	-5.7e-05
7074	-4.4e-05
7075	-4.2e-05
7076	-4.6e-05
7077	-5.7e-05
7078	-6e-05
7079	-6.2e-05
7080	-5.3e-05
7081	-5.2e-05
7082	-5.8e-05
7083	-6.6e-05
7084	-6e-05
7085	-5.6e-05
7086	-5.3e-05
7087	-5.7e-05
7088	-6.4e-05
7089	-6.8e-05
7090	-7e-05
7091	-6.4e-05
7092	-6.8e-05
7093	-7.5e-05
7094	-8.5e-05
7095	-9.5e-05
7096	-9.9e-05
7097	-9.4e-05
7098	-8.9e-05
7099	-9.2e-05
7100	-9.5e-05
7101	-0.000101
7102	-0.0001
7103	-0.000112
7104	-0.000126
7105	-0.000135
7106	-0.000119
7107	-0.000114
7108	-0.000131
7109	-0.000146
7110	-0.000149
7111	-0.000144
7112	-0.000132
7113	-0.000123
7114	-0.000127
7115	-0.000131
7116	-0.000135
7117	-0.000131
7118	-0.00013
7119	-0.000134
7120	-0.000135
7121	-0.000139
7122	-0.00013
7123	-0.000117
7124	-0.0001
7125	-0.000106
7126	-0.000112
7127	-0.000114
7128	-0.000115
7129	-0.000116
7130	-0.000127
7131	-0.000131
7132	-0.000124
7133	-0.000116
7134	-0.000114
7135	-0.000126
7136	-0.000131
7137	-0.000127
7138	-0.000122
7139	-0.000119
7140	-0.000108
7141	-0.000118
7142	-0.000123
7143	-0.000119
7144	-9.2e-05
7145	-7.8e-05
7146	-7.3e-05
7147	-7.9e-05
7148	-7.2e-05
7149	-7.6e-05
7150	-8.3e-05
7151	-9.7e-05
7152	-8.5e-05
7153	-6.3e-05
7154	-3.9e-05
7155	-3.4e-05
7156	-3.5e-05
7157	-4.7e-05
7158	-4.9e-05
7159	-2.4e-05
7160	-4e-06
7161	-8e-06
7162	-2.3e-05
7163	-3.5e-05
7164	-1.5e-05
7165	9e-06
7166	3e-06
7167	-1.4e-05
7168	-1.4e-05
7169	8e-06
7170	6e-06
7171	-4e-06
7172	-8e-06
7173	-4e-06
7174	0
7175	2e-06
7176	-2e-06
7177	-6e-06
7178	-6e-06
7179	3e-06
7180	4e-06
7181	-8e-06
7182	-9e-06
7183	1e-06
7184	1e-05
7185	1.1e-05
7186	1.4e-05
7187	1.6e-05
7188	5e-06
7189	0
7190	1.1e-05
7191	5e-06
7192	1.4e-05
7193	9e-06
7194	-3e-06
7195	-1.3e-05
7196	-7e-06
7197	2.1e-05
7198	2.8e-05
7199	2e-05
7200	7e-06
7201	-1e-06
7202	2e-06
7203	-3e-06
7204	-6e-06
7205	-5e-06
7206	-6e-06
7207	-6e-06
7208	6e-06
7209	-2e-06
7210	-7e-06
7211	-1.4e-05
7212	-8e-06
7213	-1.4e-05
7214	-1.4e-05
7215	-2.3e-05
7216	-2e-05
7217	-1.3e-05
7218	-1e-06
7219	-1.2e-05
7220	-2.8e-05
7221	-3.2e-05
7222	-3e-05
7223	-2.9e-05
7224	-3.4e-05
7225	-2.8e-05
7226	-2.6e-05
7227	-1.7e-05
7228	-1.6e-05
7229	-2.6e-05
7230	-4.2e-05
7231	-4.7e-05
7232	-2.9e-05
7233	-1.3e-05
7234	-1.7e-05
7235	-3e-05
7236	-4.1e-05
7237	-4.1e-05
7238	-4.2e-05
7239	-4.6e-05
7240	-4.3e-05
7241	-3.4e-05
7242	-4.3e-05
7243	-4.3e-05
7244	-4.7e-05
7245	-5.7e-05
7246	-6.7e-05
7247	-6.9e-05
7248	-7.3e-05
7249	-8.1e-05
7250	-7.8e-05
7251	-6.6e-05
7252	-6.9e-05
7253	-7.7e-05
7254	-7.5e-05
7255	-6.8e-05
7256	-7.1e-05
7257	-7.4e-05
7258	-8.7e-05
7259	-9.5e-05
7260	-0.000101
7261	-9.5e-05
7262	-9e-05
7263	-9.3e-05
7264	-8.8e-05
7265	-0.000104
7266	-0.000109
7267	-9.1e-05
7268	-7.8e-05
7269	-8.7e-05
7270	-0.000111
7271	-0.000111
7272	-0.00011
7273	-0.000111
7274	-0.000123
7275	-0.000126
7276	-0.00012
7277	-0.000108
7278	-0.000114
7279	-0.000134
7280	-0.000136
7281	-0.00012
7282	-0.000101
7283	-9.3e-05
7284	-0.000101
7285	-0.000115
7286	-0.00012
7287	-0.000119
7288	-0.000117
7289	-0.000128
7290	-0.000135
7291	-0.000136
7292	-0.000126
7293	-0.000105
7294	-0.000103
7295	-0.000101
7296	-0.000101
7297	-0.000105
7298	-0.000109
7299	-0.000107
7300	-0.000105
7301	-0.000104
7302	-0.000104
7303	-9.5e-05
7304	-8.5e-05
7305	-8.9e-05
7306	-8e-05
7307	-6.9e-05
7308	-7e-05
7309	-7.9e-05
7310	-7.3e-05
7311	-6.7e-05
7312	-7.2e-05
7313	-6.4e-05
7314	-6.4e-05
7315	-6.7e-05
7316	-6e-05
7317	-5.6e-05
7318	-5.7e-05
7319	-5.5e-05
7320	-5.6e-05
7321	-6e-05
7322	-6.9e-05
7323	-6.3e-05
7324	-5.6e-05
7325	-5.4e-05
7326	-6.3e-05
7327	-4.9e-05
7328	-4.5e-05
7329	-3.7e-05
7330	-3.4e-05
7331	-2.4e-05
7332	-3e-05
7333	-5e-05
7334	-3.4e-05
7335	-3e-06
7336	1.5e-05
7337	1.3e-05
7338	1.7e-05
7339	1.6e-05
7340	2.3e-05
7341	3.1e-05
7342	2.7e-05
7343	1.7e-05
7344	1.9e-05
7345	2.5e-05
7346	3.5e-05
7347	4.4e-05
7348	3.8e-05
7349	3.3e-05
7350	3.1e-05
7351	4.7e-05
7352	4.5e-05
7353	4.2e-05
7354	2.5e-05
7355	1.7e-05
7356	2.1e-05
7357	4.1e-05
7358	3.8e-05
7359	3.4e-05
7360	3.5e-05
7361	4.3e-05
7362	4.6e-05
7363	4.1e-05
7364	2.7e-05
7365	2e-05
7366	2e-05
7367	1.4e-05
7368	1.4e-05
7369	2.3e-05
7370	2e-06
7371	-1.7e-05
7372	-1.4e-05
7373	9e-06
7374	2e-05
7375	1.5e-05
7376	6e-06
7377	1e-06
7378	7e-06
7379	1e-05
7380	3e-06
7381	8e-06
7382	1.5e-05
7383	1.9e-05
7384	1.7e-05
7385	1.3e-05
7386	1.2e-05
7387	2.1e-05
7388	2.7e-05
7389	3.8e-05
7390	4.4e-05
7391	4.2e-05
7392	1.8e-05
7393	6e-06
7394	2.2e-05
7395	2.8e-05
7396	1.3e-05
7397	1.8e-05
7398	1.5e-05
7399	2.9e-05
7400	3.7e-05
7401	4.8e-05
7402	3.9e-05
7403	3.3e-05
7404	2.6e-05
7405	2.3e-05
7406	3.1e-05
7407	3.2e-05
7408	3.8e-05
7409	5e-05
7410	7.3e-05
7411	7.1e-05
7412	6.3e-05
7413	5.6e-05
7414	5.7e-05
7415	5.7e-05
7416	6e-05
7417	5.1e-05
7418	4.2e-05
7419	4.3e-05
7420	6.2e-05
7421	6.7e-05
7422	5.2e-05
7423	4.7e-05
7424	4.8e-05
7425	5.1e-05
7426	5e-05
7427	3.1e-05
7428	2.8e-05
7429	2.6e-05
7430	1.9e-05
7431	2.5e-05
7432	4.3e-05
7433	4.1e-05
7434	3.3e-05
7435	4.1e-05
7436	5.7e-05
7437	6e-05
7438	7.1e-05
7439	6e-05
7440	4.9e-05
7441	5e-05
7442	6e-05
7443	6.6e-05
7444	6.1e-05
7445	5.1e-05
7446	4.1e-05
7447	4.5e-05
7448	2.4e-05
7449	8e-06
7450	-8e-06
7451	-4e-06
7452	6e-06
7453	8e-06
7454	1e-05
7455	2.1e-05
7456	1.1e-05
7457	-1e-06
7458	-8e-06
7459	-1.7e-05
7460	-2.3e-05
7461	-1.8e-05
7462	-8e-06
7463	-7e-06
7464	-1.9e-05
7465	-1.3e-05
7466	-1.7e-05
7467	-1.4e-05
7468	-7e-06
7469	-2e-05
7470	-3e-05
7471	-4.4e-05
7472	-4.8e-05
7473	-3.2e-05
7474	-2.8e-05
7475	-3.9e-05
7476	-4.4e-05
7477	-2.5e-05
7478	-2.7e-05
7479	-3.5e-05
7480	-4e-05
7481	-5.4e-05
7482	-6.9e-05
7483	-6e-05
7484	-5.8e-05
7485	-5.3e-05
7486	-5.7e-05
7487	-6.2e-05
7488	-5.5e-05
7489	-4.5e-05
7490	-3.8e-05
7491	-5.5e-05
7492	-7.4e-05
7493	-7.9e-05
7494	-8.1e-05
7495	-8.2e-05
7496	-7.7e-05
7497	-7.6e-05
7498	-8.1e-05
7499	-9.4e-05
7500	-9.6e-05
7501	-9.2e-05
7502	-8.8e-05
7503	-9.3e-05
7504	-8e-05
7505	-7e-05
7506	-5.7e-05
7507	-6e-05
7508	-6e-05
7509	-6e-05
7510	-5.4e-05
7511	-5.5e-05
7512	-6.6e-05
7513	-8.3e-05
7514	-8.7e-05
7515	-7.9e-05
7516	-5.2e-05
7517	-5.2e-05
7518	-6.3e-05
7519	-7e-05
7520	-7.7e-05
7521	-7.2e-05
7522	-5.9e-05
7523	-4e-05
7524	-4.6e-05
7525	-4.8e-05
7526	-5.6e-05
7527	-5.8e-05
7528	-6.2e-05
7529	-5.7e-05
7530	-5.7e-05
7531	-5.2e-05
7532	-4.9e-05
7533	-4.9e-05
7534	-5.7e-05
7535	-6.3e-05
7536	-5.6e-05
7537	-4.8e-05
7538	-3.6e-05
7539	-4.4e-05
7540	-4.4e-05
7541	-4.1e-05
7542	-4.5e-05
7543	-5.1e-05
7544	-4.8e-05
7545	-3.3e-05
7546	-3.1e-05
7547	-3e-05
7548	-2.2e-05
7549	-1.5e-05
7550	-9e-06
7551	-7e-06
7552	8e-06
7553	3e-06
7554	1.9e-05
7555	2.4e-05
7556	2.3e-05
7557	1.5e-05
7558	1.5e-05
7559	2.4e-05
7560	3.1e-05
7561	2.4e-05
7562	1.3e-05
7563	2.7e-05
7564	2.6e-05
7565	3.8e-05
7566	3.6e-05
7567	2.5e-05
7568	2.8e-05
7569	3e-05
7570	3.4e-05
7571	3.2e-05
7572	3.1e-05
7573	2.9e-05
7574	3.9e-05
7575	4.1e-05
7576	3.5e-05
7577	2.1e-05
7578	1.6e-05
7579	2.7e-05
7580	3.5e-05
7581	4.4e-05
7582	4.1e-05
7583	3.1e-05
7584	3.3e-05
7585	3.2e-05
7586	3.2e-05
7587	4.2e-05
7588	4.9e-05
7589	3.8e-05
7590	3.5e-05
7591	3.3e-05
7592	3.3e-05
7593	2.9e-05
7594	3.7e-05
7595	4.4e-05
7596	4.8e-05
7597	4.9e-05
7598	4.4e-05
7599	3.9e-05
7600	2.7e-05
7601	3.4e-05
7602	5e-05
7603	5.1e-05
7604	2.9e-05
7605	2.1e-05
7606	2.8e-05
7607	3.8e-05
7608	3.9e-05
7609	4.6e-05
7610	3.8e-05
7611	3.9e-05
7612	3.9e-05
7613	3.2e-05
7614	4e-06
7615	-1.2e-05
7616	-1.2e-05
7617	-4e-06
7618	-4e-06
7619	-3e-06
7620	-1.3e-05
7621	-1e-05
7622	-1.1e-05
7623	-5e-06
7624	-2e-06
7625	-5e-06
7626	-8e-06
7627	3e-06
7628	1.8e-05
7629	3e-05
7630	2.8e-05
7631	2e-05
7632	8e-06
7633	9e-06
7634	1.3e-05
7635	1.6e-05
7636	6e-06
7637	-1.8e-05
7638	-2.2e-05
7639	-1.2e-05
7640	-4e-06
7641	-1.1e-05
7642	-1.8e-05
7643	-2.8e-05
7644	-9e-06
7645	0
7646	-4e-06
7647	-7e-06
7648	-2.2e-05
7649	-2.4e-05
7650	-2e-05
7651	-1.9e-05
7652	-1.5e-05
7653	-2.9e-05
7654	-4.2e-05
7655	-3.7e-05
7656	-2.2e-05
7657	-2.9e-05
7658	-3e-05
7659	-3.4e-05
7660	-4.2e-05
7661	-4.8e-05
7662	-5.8e-05
7663	-6.5e-05
7664	-6.6e-05
7665	-6.5e-05
7666	-5.1e-05
7667	-4.4e-05
7668	-6.5e-05
7669	-8e-05
7670	-7.9e-05
7671	-6.6e-05
7672	-6.3e-05
7673	-6.5e-05
7674	-5.8e-05
7675	-5e-05
7676	-5.1e-05
7677	-4.6e-05
7678	-5.7e-05
7679	-5.5e-05
7680	-5.4e-05
7681	-6.4e-05
7682	-6.5e-05
7683	-7.7e-05
7684	-9.8e-05
7685	-0.000104
7686	-8.9e-05
7687	-8.3e-05
7688	-8.3e-05
7689	-8.4e-05
7690	-9.5e-05
7691	-0.000105
7692	-8.7e-05
7693	-7.2e-05
7694	-8.2e-05
7695	-9.2e-05
7696	-9.5e-05
7697	-7.4e-05
7698	-5.4e-05
7699	-5.4e-05
7700	-6.1e-05
7701	-6e-05
7702	-5.8e-05
7703	-4.9e-05
7704	-5.1e-05
7705	-4.9e-05
7706	-4.7e-05
7707	-4.5e-05
7708	-3.4e-05
7709	-2.9e-05
7710	-4.3e-05
7711	-4.6e-05
7712	-6e-05
7713	-5.2e-05
7714	-4.7e-05
7715	-5.2e-05
7716	-4.2e-05
7717	-2.7e-05
7718	-1.7e-05
7719	-2.1e-05
7720	-2.2e-05
7721	-1.2e-05
7722	-2.7e-05
7723	-3.1e-05
7724	-2e-05
7725	-2.4e-05
7726	-2.5e-05
7727	-2.8e-05
7728	-2.7e-05
7729	-7e-06
7730	1.2e-05
7731	7e-06
7732	-7e-06
7733	-2.8e-05
7734	-3.6e-05
7735	-1.9e-05
7736	2e-06
7737	1.6e-05
7738	2e-05
7739	1.8e-05
7740	3.2e-05
7741	5.1e-05
7742	5.9e-05
7743	5.3e-05
7744	5.9e-05
7745	4.5e-05
7746	2.9e-05
7747	4.4e-05
7748	4.7e-05
7749	4.5e-05
7750	4.6e-05
7751	5.8e-05
7752	6.3e-05
7753	6.1e-05
7754	6.3e-05
7755	5.7e-05
7756	5.7e-05
7757	5.3e-05
7758	6e-05
7759	7e-05
7760	7.8e-05
7761	8e-05
7762	8.3e-05
7763	9.3e-05
7764	8.1e-05
7765	7.1e-05
7766	6.7e-05
7767	7.5e-05
7768	7.7e-05
7769	8e-05
7770	8.7e-05
7771	9.1e-05
7772	9.1e-05
7773	0.0001
7774	9.5e-05
7775	8.7e-05
7776	8.6e-05
7777	0.000105
7778	0.000122
7779	0.000122
7780	0.000124
7781	0.000115
7782	0.000116
7783	0.000111
7784	0.000104
7785	9.9e-05
7786	0.000107
7787	0.000104
7788	0.00011
7789	0.000126
7790	0.000126
7791	0.000114
7792	9.5e-05
7793	9.2e-05
7794	9.3e-05
7795	9.6e-05
7796	0.000102
7797	9.7e-05
7798	0.0001
7799	0.000107
7800	0.000111
7801	9.3e-05
7802	9e-05
7803	0.0001
7804	0.000104
7805	0.000102
7806	9.3e-05
7807	8.5e-05
7808	8.9e-05
7809	9.5e-05
7810	9.9e-05
7811	9.8e-05
7812	0.000108
7813	0.000106
7814	9.8e-05
7815	9.5e-05
7816	0.000101
7817	8.8e-05
7818	8.3e-05
7819	8.5e-05
7820	9.6e-05
7821	9.1e-05
7822	7.9e-05
7823	7.2e-05
7824	7.9e-05
7825	9.1e-05
7826	9.7e-05
7827	8.9e-05
7828	7.2e-05
7829	6.5e-05
7830	6.8e-05
7831	6.8e-05
7832	5.6e-05
7833	5.5e-05
7834	5.8e-05
7835	6.2e-05
7836	6.4e-05
7837	5.9e-05
7838	5.3e-05
7839	3.8e-05
7840	3.4e-05
7841	2.3e-05
7842	2.6e-05
7843	2.7e-05
7844	2.9e-05
7845	2.8e-05
7846	2.4e-05
7847	2.4e-05
7848	2e-05
7849	2.7e-05
7850	3e-05
7851	2.6e-05
7852	1.8e-05
7853	3e-06
7854	-6e-06
7855	5e-06
7856	1.4e-05
7857	1.7e-05
7858	1.6e-05
7859	1.1e-05
7860	9e-06
7861	1e-06
7862	-4e-06
7863	2e-06
7864	5e-06
7865	1e-06
7866	-6e-06
7867	-5e-06
7868	-3e-06
7869	-1.7e-05
7870	-2.5e-05
7871	-3.2e-05
7872	-3.8e-05
7873	-4.4e-05
7874	-4.5e-05
7875	-4.9e-05
7876	-3.6e-05
7877	-2.6e-05
7878	-2.2e-05
7879	-3.4e-05
7880	-3.9e-05
7881	-5.1e-05
7882	-5.3e-05
7883	-3.5e-05
7884	-2.2e-05
7885	-2.6e-05
7886	-2.3e-05
7887	-2e-05
7888	-9e-06
7889	-7e-06
7890	3e-06
7891	-7e-06
7892	-1.5e-05
7893	-2.7e-05
7894	-2.5e-05
7895	-1.6e-05
7896	-1.4e-05
7897	-4e-06
7898	2e-06
7899	-1e-06
7900	1e-05
7901	3.1e-05
7902	4.1e-05
7903	3.3e-05
7904	4.3e-05
7905	5.5e-05
7906	6.3e-05
7907	4.7e-05
7908	4.1e-05
7909	5.8e-05
7910	7e-05
7911	6.9e-05
7912	6.6e-05
7913	5.9e-05
7914	6.4e-05
7915	8.4e-05
7916	9e-05
7917	8.3e-05
7918	8.1e-05
7919	9.2e-05
7920	9.5e-05
7921	9.8e-05
7922	0.000101
7923	9.9e-05
7924	8.3e-05
7925	9.5e-05
7926	0.000106
7927	0.000105
7928	9.8e-05
7929	8.8e-05
7930	9.6e-05
7931	0.000104
7932	0.000102
7933	9.1e-05
7934	8.3e-05
7935	7.3e-05
7936	8.1e-05
7937	7.8e-05
7938	6.2e-05
7939	5e-05
7940	4.7e-05
7941	5.8e-05
7942	6.9e-05
7943	7.7e-05
7944	8e-05
7945	7.5e-05
7946	7.1e-05
7947	8.8e-05
7948	8.5e-05
7949	8.3e-05
7950	7.4e-05
7951	6.9e-05
7952	6.5e-05
7953	5.9e-05
7954	6.8e-05
7955	8.6e-05
7956	8e-05
7957	7.9e-05
7958	8.1e-05
7959	9.9e-05
7960	9.7e-05
7961	8.6e-05
7962	8.6e-05
7963	6.7e-05
7964	7e-05
7965	8.8e-05
7966	0.000106
7967	9.6e-05
7968	9e-05
7969	7.9e-05
7970	7.9e-05
7971	8.1e-05
7972	7.3e-05
7973	7.4e-05
7974	7.4e-05
7975	8.1e-05
7976	7.5e-05
7977	7.8e-05
7978	8.2e-05
7979	9.1e-05
7980	9.9e-05
7981	9.7e-05
7982	9.5e-05
7983	8.5e-05
7984	8.6e-05
7985	7.8e-05
7986	6e-05
7987	6.4e-05
7988	8e-05
7989	7.2e-05
7990	6.9e-05
7991	6.3e-05
7992	4.8e-05
7993	3.6e-05
7994	4.4e-05
7995	5.9e-05
7996	6e-05
7997	6e-05
7998	5.6e-05
[truncated: 4,001 more rows]
