# Supplementary material for: Homo-oligomerization of the human adenosine A2A receptor is driven by the intrinsically disordered C-terminus
Source: eLife. 2021 Jul 16;10:e66662. doi: 10.7554/eLife.66662 (PMC8328514; doi:10.7554/eLife.66662)
Supplement: Figure 5—source data 1. [file elife-66662-fig5-data1.xlsx]

## Sheet: WT 0.95 M
Time	UV
6000	0.005069
6001	0.005132
6002	0.005148
6003	0.005143
6004	0.005128
6005	0.00511
6006	0.005112
6007	0.005099
6008	0.005087
6009	0.005093
6010	0.005127
6011	0.00516
6012	0.005108
6013	0.00508
6014	0.005047
6015	0.005033
6016	0.005023
6017	0.005093
6018	0.005154
6019	0.005192
6020	0.005159
6021	0.005194
6022	0.005181
6023	0.005099
6024	0.005088
6025	0.005101
6026	0.005129
6027	0.005123
6028	0.005043
6029	0.005025
6030	0.004999
6031	0.004978
6032	0.00499
6033	0.005017
6034	0.005061
6035	0.005109
6036	0.005086
6037	0.005038
6038	0.004981
6039	0.004948
6040	0.004976
6041	0.004985
6042	0.005014
6043	0.005024
6044	0.005012
6045	0.004984
6046	0.004992
6047	0.00503
6048	0.005124
6049	0.005115
6050	0.005126
6051	0.005093
6052	0.005077
6053	0.005066
6054	0.005084
6055	0.005132
6056	0.005144
6057	0.00509
6058	0.005033
6059	0.005023
6060	0.005098
6061	0.005118
6062	0.005083
6063	0.005059
6064	0.005113
6065	0.005145
6066	0.00511
6067	0.005085
6068	0.005111
6069	0.005144
6070	0.005125
6071	0.005133
6072	0.005116
6073	0.005059
6074	0.005123
6075	0.005103
6076	0.005041
6077	0.00506
6078	0.005182
6079	0.005246
6080	0.005189
6081	0.00518
6082	0.005232
6083	0.005229
6084	0.005203
6085	0.005196
6086	0.005164
6087	0.005146
6088	0.005113
6089	0.005118
6090	0.005167
6091	0.005135
6092	0.005113
6093	0.005086
6094	0.005076
6095	0.005075
6096	0.005029
6097	0.004988
6098	0.004962
6099	0.005042
6100	0.005078
6101	0.005119
6102	0.005136
6103	0.005157
6104	0.005153
6105	0.00517
6106	0.00517
6107	0.005199
6108	0.005189
6109	0.005143
6110	0.005154
6111	0.005186
6112	0.005156
6113	0.005135
6114	0.005186
6115	0.005227
6116	0.005215
6117	0.005237
6118	0.005193
6119	0.005182
6120	0.005236
6121	0.00529
6122	0.005229
6123	0.005119
6124	0.005099
6125	0.005078
6126	0.005038
6127	0.005037
6128	0.005037
6129	0.005039
6130	0.005062
6131	0.005038
6132	0.005056
6133	0.005067
6134	0.005156
6135	0.005153
6136	0.005122
6137	0.005089
6138	0.00508
6139	0.005053
6140	0.005035
6141	0.005024
6142	0.004986
6143	0.004987
6144	0.005009
6145	0.005009
6146	0.00501
6147	0.005025
6148	0.005047
6149	0.005065
6150	0.005067
6151	0.005102
6152	0.005181
6153	0.005242
6154	0.005242
6155	0.005211
6156	0.005219
6157	0.005205
6158	0.005156
6159	0.005132
6160	0.00508
6161	0.005049
6162	0.005002
6163	0.004982
6164	0.005011
6165	0.005049
6166	0.00511
6167	0.005146
6168	0.00509
6169	0.005102
6170	0.005086
6171	0.005068
6172	0.005088
6173	0.0051
6174	0.00513
6175	0.005113
6176	0.005077
6177	0.005043
6178	0.005016
6179	0.00504
6180	0.005067
6181	0.005101
6182	0.005085
6183	0.005093
6184	0.005143
6185	0.005135
6186	0.00507
6187	0.005061
6188	0.005075
6189	0.00505
6190	0.005033
6191	0.004979
6192	0.004931
6193	0.004907
6194	0.004963
6195	0.004951
6196	0.004976
6197	0.004977
6198	0.00502
6199	0.005032
6200	0.005005
6201	0.005043
6202	0.005078
6203	0.005078
6204	0.005069
6205	0.005106
6206	0.005086
6207	0.005089
6208	0.005113
6209	0.005094
6210	0.005066
6211	0.005096
6212	0.005124
6213	0.005048
6214	0.004998
6215	0.004987
6216	0.004999
6217	0.005033
6218	0.00505
6219	0.005022
6220	0.005011
6221	0.005056
6222	0.005005
6223	0.005054
6224	0.005117
6225	0.005204
6226	0.005205
6227	0.005224
6228	0.005213
6229	0.005249
6230	0.005223
6231	0.005192
6232	0.005141
6233	0.005135
6234	0.005182
6235	0.005153
6236	0.00515
6237	0.005212
6238	0.005243
6239	0
6240	0
6241	4e-06
6242	5e-05
6243	8.4e-05
6244	2.4e-05
6245	5.7e-05
6246	8.7e-05
6247	8.5e-05
6248	9.4e-05
6249	9.3e-05
6250	8.7e-05
6251	0.000112
6252	0.000153
6253	5.9e-05
6254	-2.5e-05
6255	-5e-06
6256	2.5e-05
6257	-8e-06
6258	-4.3e-05
6259	-7e-05
6260	-0.000116
6261	-0.000128
6262	-8.3e-05
6263	-5.1e-05
6264	-5.7e-05
6265	-5.3e-05
6266	-4e-05
6267	-0.000106
6268	-0.00012
6269	-2.4e-05
6270	1.9e-05
6271	-1e-06
6272	-9e-06
6273	1.3e-05
6274	4.1e-05
6275	8.1e-05
6276	9e-05
6277	0.000127
6278	0.000111
6279	0.00014
6280	0.000169
6281	9.3e-05
6282	-1.3e-05
6283	-7.4e-05
6284	-5.9e-05
6285	-2.9e-05
6286	-5e-05
6287	-0.000101
6288	-0.0001
6289	-6.4e-05
6290	-9.1e-05
6291	-0.000101
6292	-5.8e-05
6293	-1.3e-05
6294	-1.3e-05
6295	3e-06
6296	-2.7e-05
6297	1.4e-05
6298	-1e-05
6299	-4.7e-05
6300	-2e-05
6301	3.5e-05
6302	0.000107
6303	0.000134
6304	0.000154
6305	0.000116
6306	1.8e-05
6307	-4e-05
6308	-2.4e-05
6309	1e-05
6310	5.2e-05
6311	5.8e-05
6312	7.3e-05
6313	5e-05
6314	9.5e-05
6315	0.000128
6316	9.9e-05
6317	4.3e-05
6318	3.9e-05
6319	9.7e-05
6320	7.7e-05
6321	6.1e-05
6322	7.7e-05
6323	7.8e-05
6324	1.5e-05
6325	1.1e-05
6326	0.000103
6327	0.000125
6328	0.000129
6329	0.000161
6330	0.000195
6331	0.000225
6332	0.000208
6333	0.000178
6334	0.000144
6335	0.000127
6336	0.00017
6337	0.000187
6338	0.000185
6339	0.000159
6340	0.0001
6341	3.4e-05
6342	1.8e-05
6343	0.00011
6344	0.00014
6345	8.4e-05
6346	8.4e-05
6347	8.3e-05
6348	8.7e-05
6349	0.00011
6350	9.3e-05
6351	2.2e-05
6352	4.5e-05
6353	4.4e-05
6354	6.7e-05
6355	5.4e-05
6356	9.8e-05
6357	0.000106
6358	0.000178
6359	0.000231
6360	0.000318
6361	0.000457
6362	0.000569
6363	0.000629
6364	0.00068
6365	0.000698
6366	0.000698
6367	0.000715
6368	0.000733
6369	0.000772
6370	0.000773
6371	0.000735
6372	0.000686
6373	0.000601
6374	0.000583
6375	0.000703
6376	0.000793
6377	0.000769
6378	0.000674
6379	0.000586
6380	0.000597
6381	0.000647
6382	0.000646
6383	0.000621
6384	0.000596
6385	0.000597
6386	0.000567
6387	0.000551
6388	0.000574
6389	0.000559
6390	0.000553
6391	0.000598
6392	0.000567
6393	0.000548
6394	0.000495
6395	0.000391
6396	0.000244
6397	0.00026
6398	0.000284
6399	0.000261
6400	0.000195
6401	0.000274
6402	0.000279
6403	0.000232
6404	0.000114
6405	8.3e-05
6406	8.5e-05
6407	0.000119
6408	0.000149
6409	0.000174
6410	0.000131
6411	0.000148
6412	0.000209
6413	0.000164
6414	0.000101
6415	0.000123
6416	0.000154
6417	0.00012
6418	9.6e-05
6419	0.000162
6420	0.000206
6421	0.000213
6422	0.000181
6423	0.000162
6424	0.000133
6425	5.9e-05
6426	5.5e-05
6427	8.2e-05
6428	0.000109
6429	0.000156
6430	0.00018
6431	0.000112
6432	0.000106
6433	0.000136
6434	0.000125
6435	0.000128
6436	0.000121
6437	8.7e-05
6438	0.000138
6439	6.8e-05
6440	-3.4e-05
6441	-1.2e-05
6442	-6e-06
6443	-4.2e-05
6444	-6.6e-05
6445	-6.6e-05
6446	-0.000101
6447	-0.000107
6448	-7e-05
6449	-1.5e-05
6450	-1.2e-05
6451	-1.1e-05
6452	-5.7e-05
6453	-6e-05
6454	-2.2e-05
6455	-6.2e-05
6456	-6.3e-05
6457	-5.1e-05
6458	-5.6e-05
6459	-7.4e-05
6460	-6.6e-05
6461	-3.4e-05
6462	-8.2e-05
6463	-6.6e-05
6464	-7.6e-05
6465	-3.6e-05
6466	-3.2e-05
6467	-4.2e-05
6468	4e-05
6469	7.8e-05
6470	9.9e-05
6471	1.3e-05
6472	-3.8e-05
6473	-3.7e-05
6474	1.7e-05
6475	3.7e-05
6476	-1.4e-05
6477	-2.3e-05
6478	7e-06
6479	0
6480	-6.1e-05
6481	-0.000127
6482	-9.8e-05
6483	-8.1e-05
6484	-0.000116
6485	-0.000135
6486	-0.000114
6487	-6.2e-05
6488	-1.5e-05
6489	-9.7e-05
6490	-9.4e-05
6491	-2.7e-05
6492	-1.7e-05
6493	-7.9e-05
6494	-0.000124
6495	-0.000179
6496	-0.000189
6497	-0.00016
6498	-0.000173
6499	-0.000231
6500	-0.000264
6501	-0.000204
6502	-0.000114
6503	-6.6e-05
6504	-5.6e-05
6505	-7.1e-05
6506	-7e-05
6507	-7.2e-05
6508	-3.2e-05
6509	-3.7e-05
6510	-7.4e-05
6511	-0.000108
6512	-5.3e-05
6513	-4.8e-05
6514	-6.6e-05
6515	-9.2e-05
6516	-7.9e-05
6517	-6e-05
6518	-7.7e-05
6519	-9.9e-05
6520	-8.8e-05
6521	-4.8e-05
6522	-4.6e-05
6523	-8.2e-05
6524	-0.000104
6525	-5e-06
6526	0.000106
6527	7.1e-05
6528	-1e-05
6529	2e-05
6530	5.3e-05
6531	3e-05
6532	-4.2e-05
6533	-7.6e-05
6534	-2.7e-05
6535	-2e-06
6536	-2.1e-05
6537	-4.3e-05
6538	-9.8e-05
6539	-6.6e-05
6540	-7.4e-05
6541	-4.2e-05
6542	-1e-06
6543	7e-06
6544	-2.9e-05
6545	-8.3e-05
6546	-0.000108
6547	-0.000109
6548	-0.000147
6549	-0.000114
6550	-6.3e-05
6551	-9e-05
6552	-0.000111
6553	-9.9e-05
6554	-0.000104
6555	-0.000133
6556	-0.000104
6557	-1e-05
6558	1.9e-05
6559	4.6e-05
6560	3.4e-05
6561	-1.5e-05
6562	-7.1e-05
6563	-0.000111
6564	-0.000111
6565	-0.000113
6566	-9.7e-05
6567	-3.1e-05
6568	3e-05
6569	2.7e-05
6570	2.8e-05
6571	-1.3e-05
6572	0
6573	-2e-06
6574	2.8e-05
6575	-5e-06
6576	-1e-06
6577	3.3e-05
6578	4.9e-05
6579	3e-05
6580	-2.3e-05
6581	-3.4e-05
6582	-9.2e-05
6583	-3.8e-05
6584	-1.8e-05
6585	-4e-06
6586	-2.6e-05
6587	-0.000106
6588	-0.000129
6589	-8.5e-05
6590	-7.7e-05
6591	-8.9e-05
6592	-9e-05
6593	-8.8e-05
6594	-8.3e-05
6595	-0.000104
6596	-9.3e-05
6597	-2.4e-05
6598	-4.9e-05
6599	-0.000105
6600	-6.5e-05
6601	-3.6e-05
6602	-7.8e-05
6603	-0.000102
6604	-7.3e-05
6605	-8.9e-05
6606	-0.000157
6607	-0.000241
6608	-0.000241
6609	-0.00016
6610	-0.00011
6611	-0.00013
6612	-0.000194
6613	-0.000204
6614	-0.000204
6615	-0.000223
6616	-0.000235
6617	-0.000251
6618	-0.000286
6619	-0.000282
6620	-0.000293
6621	-0.000294
6622	-0.000243
6623	-0.000217
6624	-0.000204
6625	-0.000219
6626	-0.000211
6627	-0.000178
6628	-0.00014
6629	-0.000154
6630	-0.00014
6631	-7.6e-05
6632	-7e-06
6633	-0.000107
6634	-0.000145
6635	-0.00016
6636	-0.000147
6637	-0.000142
6638	-0.00015
6639	-0.000151
6640	-0.000186
6641	-0.000189
6642	-0.000212
6643	-0.00023
6644	-0.000197
6645	-0.000199
6646	-0.000142
6647	-0.000106
6648	-0.000153
6649	-0.000171
6650	-0.000138
6651	-0.000137
6652	-8.3e-05
6653	-7.3e-05
6654	-7.6e-05
6655	-7.6e-05
6656	-0.000114
6657	-0.000149
6658	-0.000177
6659	-0.000203
6660	-0.000184
6661	-0.000213
6662	-0.000207
6663	-0.000129
6664	-7.3e-05
6665	-7.9e-05
6666	-9.7e-05
6667	-0.000114
6668	-0.000155
6669	-0.00014
6670	-0.000181
6671	-0.00018
6672	-0.000163
6673	-0.000156
6674	-0.000171
6675	-0.000133
6676	-0.000101
6677	-0.000141
6678	-0.000131
6679	-0.000113
6680	-0.000144
6681	-0.000182
6682	-0.000102
6683	-4.1e-05
6684	4.9e-05
6685	8.9e-05
6686	-2e-06
6687	-0.000157
6688	-0.000204
6689	-0.00019
6690	-0.000209
6691	-0.000193
6692	-0.000117
6693	-7.2e-05
6694	-2.1e-05
6695	2e-05
6696	-4.1e-05
6697	-9.6e-05
6698	-0.000179
6699	-0.000185
6700	-0.000187
6701	-8.7e-05
6702	-7.3e-05
6703	-8.9e-05
6704	-8.2e-05
6705	-1.3e-05
6706	2.9e-05
6707	-3.2e-05
6708	-0.000126
6709	-0.000187
6710	-0.000187
6711	-0.000186
6712	-0.000187
6713	-0.00014
6714	-0.000111
6715	-0.000147
6716	-0.000214
6717	-0.00024
6718	-0.000222
6719	-0.000202
6720	-0.000153
6721	-0.000133
6722	-0.000148
6723	-0.000204
6724	-0.000289
6725	-0.000315
6726	-0.000272
6727	-0.000275
6728	-0.000342
6729	-0.000425
6730	-0.000411
6731	-0.000313
6732	-0.000296
6733	-0.000347
6734	-0.000359
6735	-0.000302
6736	-0.000296
6737	-0.000258
6738	-0.000273
6739	-0.000344
6740	-0.000394
6741	-0.000357
6742	-0.000368
6743	-0.000366
6744	-0.000367
6745	-0.000392
6746	-0.000406
6747	-0.000386
6748	-0.000369
6749	-0.000361
6750	-0.000399
6751	-0.000432
6752	-0.000375
6753	-0.000355
6754	-0.000381
6755	-0.000415
6756	-0.000437
6757	-0.00043
6758	-0.000478
6759	-0.000492
6760	-0.000415
6761	-0.000443
6762	-0.000493
6763	-0.000502
6764	-0.000481
6765	-0.000472
6766	-0.000461
6767	-0.000539
6768	-0.00056
6769	-0.000548
6770	-0.0005
6771	-0.000498
6772	-0.000543
6773	-0.000583
6774	-0.000633
6775	-0.000671
6776	-0.000651
6777	-0.00061
6778	-0.000566
6779	-0.000503
6780	-0.000451
6781	-0.000483
6782	-0.00056
6783	-0.000612
6784	-0.000648
6785	-0.00059
6786	-0.00049
6787	-0.000405
6788	-0.000427
6789	-0.000463
6790	-0.00047
6791	-0.000451
6792	-0.000443
6793	-0.000472
6794	-0.000533
6795	-0.000494
6796	-0.000503
6797	-0.000448
6798	-0.000397
6799	-0.000403
6800	-0.000402
6801	-0.000423
6802	-0.000504
6803	-0.000469
6804	-0.000415
6805	-0.000412
6806	-0.00045
6807	-0.000423
6808	-0.000436
6809	-0.00046
6810	-0.00048
6811	-0.000443
6812	-0.000467
6813	-0.000437
6814	-0.000446
6815	-0.000428
6816	-0.000453
6817	-0.000473
6818	-0.000504
6819	-0.000529
6820	-0.000527
6821	-0.000507
6822	-0.000515
6823	-0.000488
6824	-0.000535
6825	-0.000547
6826	-0.000492
6827	-0.000415
6828	-0.000448
6829	-0.000469
6830	-0.000496
6831	-0.000532
6832	-0.000512
6833	-0.000499
6834	-0.000455
6835	-0.000432
6836	-0.000423
6837	-0.000476
6838	-0.000495
6839	-0.000495
6840	-0.000528
6841	-0.000554
6842	-0.000536
6843	-0.000496
6844	-0.000457
6845	-0.000403
6846	-0.00039
6847	-0.000428
6848	-0.000507
6849	-0.000579
6850	-0.000569
6851	-0.000488
6852	-0.000464
6853	-0.000442
6854	-0.000453
6855	-0.000473
6856	-0.000444
6857	-0.000445
6858	-0.00046
6859	-0.000413
6860	-0.000404
6861	-0.000456
6862	-0.0005
6863	-0.000484
6864	-0.000481
6865	-0.000451
6866	-0.000435
6867	-0.00041
6868	-0.000423
6869	-0.000481
6870	-0.000485
6871	-0.000457
6872	-0.000451
6873	-0.00046
6874	-0.000496
6875	-0.000501
6876	-0.000533
6877	-0.000578
6878	-0.000588
6879	-0.000548
6880	-0.000512
6881	-0.000449
6882	-0.000432
6883	-0.000362
6884	-0.000365
6885	-0.000385
6886	-0.000407
6887	-0.000374
6888	-0.000424
6889	-0.000537
6890	-0.000592
6891	-0.000575
6892	-0.000556
6893	-0.000548
6894	-0.000515
6895	-0.000446
6896	-0.00049
6897	-0.000573
6898	-0.000562
6899	-0.000499
6900	-0.000437
6901	-0.000487
6902	-0.00046
6903	-0.000466
6904	-0.000474
6905	-0.000426
6906	-0.000379
6907	-0.000374
6908	-0.000397
6909	-0.000398
6910	-0.000432
6911	-0.000466
6912	-0.000487
6913	-0.000534
6914	-0.000529
6915	-0.000539
6916	-0.000596
6917	-0.000616
6918	-0.000592
6919	-0.000571
6920	-0.000585
6921	-0.000587
6922	-0.000548
6923	-0.000559
6924	-0.000511
6925	-0.000501
6926	-0.000535
6927	-0.000566
6928	-0.000567
6929	-0.000554
6930	-0.000498
6931	-0.000466
6932	-0.000427
6933	-0.000398
6934	-0.000334
6935	-0.000442
6936	-0.000537
6937	-0.000541
6938	-0.000459
6939	-0.000414
6940	-0.000449
6941	-0.000442
6942	-0.000471
6943	-0.000434
6944	-0.000394
6945	-0.000359
6946	-0.00038
6947	-0.000445
6948	-0.000469
6949	-0.000466
6950	-0.000494
6951	-0.000411
6952	-0.000349
6953	-0.00033
6954	-0.000346
6955	-0.000344
6956	-0.000415
6957	-0.000447
6958	-0.000499
6959	-0.00051
6960	-0.000508
6961	-0.000468
6962	-0.000434
6963	-0.000409
6964	-0.000349
6965	-0.000375
6966	-0.000403
6967	-0.000456
6968	-0.000432
6969	-0.000319
6970	-0.0003
6971	-0.000284
6972	-0.000342
6973	-0.000434
6974	-0.000433
6975	-0.000409
6976	-0.000418
6977	-0.000409
6978	-0.000396
6979	-0.000391
6980	-0.000418
6981	-0.000389
6982	-0.000335
6983	-0.00032
6984	-0.000304
6985	-0.000321
6986	-0.000344
6987	-0.00032
6988	-0.000317
6989	-0.000321
6990	-0.000314
6991	-0.000276
6992	-0.000265
6993	-0.000283
6994	-0.000275
6995	-0.000282
6996	-0.00026
6997	-0.00023
6998	-0.00025
6999	-0.000279
7000	-0.000268
7001	-0.000246
7002	-0.000275
7003	-0.000276
7004	-0.00022
7005	-0.000198
7006	-0.000234
7007	-0.000227
7008	-0.000182
7009	-0.000196
7010	-0.0003
7011	-0.000309
7012	-0.000251
7013	-0.000228
7014	-0.000203
7015	-0.000146
7016	-0.000127
7017	-0.000108
7018	-0.000133
7019	-0.000144
7020	-0.000118
7021	-0.000102
7022	-7.8e-05
7023	-0.000127
7024	-0.000171
7025	-0.000202
7026	-0.000197
7027	-0.000236
7028	-0.000258
7029	-0.000223
7030	-0.000233
7031	-0.000255
7032	-0.00027
7033	-0.00024
7034	-0.000202
7035	-0.000153
7036	-0.000148
7037	-0.000141
7038	-0.000171
7039	-0.000142
7040	-5.3e-05
7041	-3.8e-05
7042	-3.3e-05
7043	2e-06
7044	-1.2e-05
7045	-7.7e-05
7046	-6.2e-05
7047	-4.4e-05
7048	-5.8e-05
7049	-7.9e-05
7050	-0.000101
7051	-0.000145
7052	-0.000123
7053	-5.4e-05
7054	-4.3e-05
7055	-8e-05
7056	-0.000142
7057	-0.000226
7058	-0.000269
7059	-0.000263
7060	-0.000253
7061	-0.000269
7062	-0.00025
7063	-0.000242
7064	-0.000224
7065	-0.000255
7066	-0.000275
7067	-0.00027
7068	-0.000285
7069	-0.00031
7070	-0.000268
7071	-0.000253
7072	-0.000233
7073	-0.000269
7074	-0.000289
7075	-0.000307
7076	-0.000274
7077	-0.000291
7078	-0.000291
7079	-0.000253
7080	-0.000191
7081	-0.000128
7082	-0.000108
7083	-0.000172
7084	-0.000169
7085	-0.00017
7086	-0.000221
7087	-0.000221
7088	-0.00024
7089	-0.00018
7090	-0.000207
7091	-0.000237
7092	-0.000285
7093	-0.000279
7094	-0.000243
7095	-0.000266
7096	-0.000301
7097	-0.000261
7098	-0.000222
7099	-0.000193
7100	-0.000138
7101	-0.000157
7102	-0.000211
7103	-0.000165
7104	-0.00017
7105	-0.000202
7106	-0.000219
7107	-0.000143
7108	-9.3e-05
7109	-9.6e-05
7110	-0.000107
7111	-8.4e-05
7112	-4.9e-05
7113	-2.5e-05
7114	3.4e-05
7115	5.8e-05
7116	5.4e-05
7117	1.4e-05
7118	7e-06
7119	-2.4e-05
7120	-5.7e-05
7121	-4.7e-05
7122	-2.7e-05
7123	5e-06
7124	1.4e-05
7125	1e-05
7126	-2.8e-05
7127	-3.7e-05
7128	-2.4e-05
7129	-9e-06
7130	4.5e-05
7131	9.2e-05
7132	0.000145
7133	0.000159
7134	0.000152
7135	0.000106
7136	9e-05
7137	0.000102
7138	0.000148
7139	0.000146
7140	0.000157
7141	0.000215
7142	0.000305
7143	0.00031
7144	0.000301
7145	0.00025
7146	0.000265
7147	0.000262
7148	0.000258
7149	0.000284
7150	0.000331
7151	0.000355
7152	0.00036
7153	0.000372
7154	0.00037
7155	0.00043
7156	0.000443
7157	0.000464
7158	0.000448
7159	0.000462
7160	0.00044
7161	0.000473
7162	0.000481
7163	0.000486
7164	0.000421
7165	0.000428
7166	0.000406
7167	0.000384
7168	0.000395
7169	0.000425
7170	0.000395
7171	0.000383
7172	0.000409
7173	0.000427
7174	0.000457
7175	0.000466
7176	0.000455
7177	0.000378
7178	0.000321
7179	0.000328
7180	0.000303
7181	0.000275
7182	0.000271
7183	0.000328
7184	0.000386
7185	0.0004
7186	0.000405
7187	0.000375
7188	0.000356
7189	0.00036
7190	0.000335
7191	0.000348
7192	0.000382
7193	0.00037
7194	0.000392
7195	0.000362
7196	0.000308
7197	0.000237
7198	0.000227
7199	0.000262
7200	0.000342
7201	0.000364
7202	0.00033
7203	0.000297
7204	0.000352
7205	0.000393
7206	0.000397
7207	0.000397
7208	0.000348
7209	0.000319
7210	0.000284
7211	0.000296
7212	0.000335
7213	0.000328
7214	0.000295
7215	0.000226
7216	0.000238
7217	0.000264
7218	0.000236
7219	0.000235
7220	0.000242
7221	0.000283
7222	0.000335
7223	0.000299
7224	0.000226
7225	0.000235
7226	0.000225
7227	0.000197
7228	0.000214
7229	0.000288
7230	0.00033
7231	0.000294
7232	0.000252
7233	0.000229
7234	0.000188
7235	9e-05
7236	6.2e-05
7237	0.000109
7238	0.000176
7239	0.000195
7240	0.000184
7241	0.000161
7242	0.000153
7243	0.000183
7244	0.000208
7245	0.000252
7246	0.000259
7247	0.000216
7248	0.000217
7249	0.000216
7250	0.000253
7251	0.000254
7252	0.000226
7253	0.000268
7254	0.000326
7255	0.00029
7256	0.000231
7257	0.000218
7258	0.000198
7259	0.000201
7260	0.000207
7261	0.000212
7262	0.000215
7263	0.000195
7264	0.000188
7265	0.000192
7266	0.000212
7267	0.000224
7268	0.00022
7269	0.000237
7270	0.000208
7271	0.000124
7272	0.000106
7273	0.000156
7274	0.000193
7275	0.000192
7276	0.000157
7277	0.000151
7278	0.000218
7279	0.000242
7280	0.000186
7281	0.000151
7282	0.000163
7283	0.000205
7284	0.000236
7285	0.000223
7286	0.000225
7287	0.000247
7288	0.000249
7289	0.000269
7290	0.000243
7291	0.000201
7292	0.000176
7293	0.000174
7294	0.000198
7295	0.000233
7296	0.000246
7297	0.000263
7298	0.000264
7299	0.000187
7300	0.000137
7301	0.000135
7302	0.000185
7303	0.000177
7304	0.000204
7305	0.000257
7306	0.000291
7307	0.000291
7308	0.000275
7309	0.000253
7310	0.000252
7311	0.000284
7312	0.000312
7313	0.00039
7314	0.000402
7315	0.000394
7316	0.000312
7317	0.000188
7318	0.000147
7319	0.000238
7320	0.000274
7321	0.000246
7322	0.000258
7323	0.000243
7324	0.000211
7325	0.000185
7326	0.000158
7327	0.000175
7328	0.000179
7329	0.000164
7330	0.000218
7331	0.000288
7332	0.000238
7333	0.000174
7334	0.000125
7335	0.000146
7336	0.000169
7337	0.000215
7338	0.000154
7339	0.000172
7340	0.000208
7341	0.000189
7342	0.000128
7343	0.00011
7344	0.000115
7345	0.00015
7346	0.000125
7347	0.000101
7348	8.8e-05
7349	7.9e-05
7350	6.2e-05
7351	0.000107
7352	0.00018
7353	0.000223
7354	0.000228
7355	0.000202
7356	0.000192
7357	0.000201
7358	0.000167
7359	0.000153
7360	0.000173
7361	0.000243
7362	0.0003
7363	0.000295
7364	0.00028
7365	0.000286
7366	0.000297
7367	0.000251
7368	0.000231
7369	0.000277
7370	0.000251
7371	0.000217
7372	0.000254
7373	0.000306
7374	0.000256
7375	0.000184
7376	0.000155
7377	0.000195
7378	0.000187
7379	0.000199
7380	0.000193
7381	0.000148
7382	0.0002
7383	0.000263
7384	0.000204
7385	0.000235
7386	0.000229
7387	0.000226
7388	0.000207
7389	0.000202
7390	0.000136
7391	0.000166
7392	0.000168
7393	0.000112
7394	0.0001
7395	0.00013
7396	0.000124
7397	0.000102
7398	5.8e-05
7399	9.6e-05
7400	8.4e-05
7401	9.3e-05
7402	0.000118
7403	0.000168
7404	0.00018
7405	0.000133
7406	0.000144
7407	0.000143
7408	0.000156
7409	0.000169
7410	0.000156
7411	0.000104
7412	7.8e-05
7413	7.4e-05
7414	5.1e-05
7415	1.6e-05
7416	4.8e-05
7417	4.5e-05
7418	3.6e-05
7419	4.2e-05
7420	0.000134
7421	0.000151
7422	0.000119
7423	7.4e-05
7424	7.8e-05
7425	0.000126
7426	0.000162
7427	0.000143
7428	0.000188
7429	0.000228
7430	0.000218
7431	0.000217
7432	0.000305
7433	0.000314
7434	0.000251
7435	0.000251
7436	0.000269
7437	0.000239
7438	0.000235
7439	0.00022
7440	0.000268
7441	0.000268
7442	0.000281
7443	0.000264
7444	0.000257
7445	0.000226
7446	0.000275
7447	0.000262
7448	0.000183
7449	0.000216
7450	0.000252
7451	0.0003
7452	0.000359
7453	0.000342
7454	0.000246
7455	0.000261
7456	0.000291
7457	0.000375
7458	0.000396
7459	0.000357
7460	0.000346
7461	0.000353
7462	0.000378
7463	0.000346
7464	0.000367
7465	0.000349
7466	0.000311
7467	0.000324
7468	0.000351
7469	0.000375
7470	0.000304
7471	0.000309
7472	0.000327
7473	0.000383
7474	0.000415
7475	0.000414
7476	0.000362
7477	0.000239
7478	0.000206
7479	0.00019
7480	0.000135
7481	0.000139
7482	0.000266
7483	0.000318
7484	0.000308
7485	0.000297
7486	0.000254
7487	0.000199
7488	0.000214
7489	0.000203
7490	0.000218
7491	0.00019
7492	0.000172
7493	0.000151
7494	0.000165
7495	0.000231
7496	0.000282
7497	0.000299
7498	0.00027
7499	0.000181
7500	0.000135
7501	0.000126
7502	0.000205
7503	0.0002
7504	0.000187
7505	0.000199
7506	0.000222
7507	0.000209
7508	0.000219
7509	0.000233
7510	0.000167
7511	9.5e-05
7512	0.000132
7513	0.000154
7514	9.7e-05
7515	6.6e-05
7516	0.000104
7517	0.000117
7518	7.8e-05
7519	9.3e-05
7520	0.000169
7521	0.00011
7522	8e-05
7523	0.00011
7524	0.000146
7525	0.000111
7526	0.000116
7527	0.000149
7528	0.000234
7529	0.000289
7530	0.000236
7531	0.000157
7532	0.000143
7533	9.8e-05
7534	0.000113
7535	0.000163
7536	0.000206
7537	0.00026
7538	0.000311
7539	0.000308
7540	0.000269
7541	0.000227
7542	0.000173
7543	0.00014
7544	0.000112
7545	0.000132
7546	0.00014
7547	8.2e-05
7548	4.9e-05
7549	9.8e-05
7550	0.000159
7551	0.000194
7552	0.000158
7553	5.7e-05
7554	1.5e-05
7555	3.9e-05
7556	9.4e-05
7557	0.000125
7558	0.000118
7559	0.000172
7560	0.000173
7561	0.000226
7562	0.000192
7563	0.000158
7564	0.0001
7565	0.000141
7566	0.000187
7567	0.000188
7568	0.000158
7569	0.000141
7570	0.000105
7571	5.8e-05
7572	2.1e-05
7573	-1.2e-05
7574	-2e-05
7575	-1.7e-05
7576	1e-05
7577	6.3e-05
7578	7.4e-05
7579	0.000103
7580	0.000189
7581	0.000214
7582	0.000187
7583	0.00015
7584	0.000158
7585	0.000144
7586	0.000151
7587	0.000162
7588	0.000131
7589	8.3e-05
7590	0.000107
7591	0.000104
7592	0.0001
7593	9.7e-05
7594	0.000132
7595	0.000149
7596	0.000132
7597	9.2e-05
7598	9.4e-05
7599	0.000177
7600	0.000249
7601	0.000158
7602	0.000134
7603	0.000181
7604	0.000251
7605	0.00025
7606	0.000231
7607	0.000197
7608	0.000222
7609	0.00022
7610	0.000213
7611	0.000212
7612	0.000228
7613	0.000202
7614	0.000185
7615	0.000211
7616	0.000261
7617	0.000219
7618	0.000203
7619	0.000261
7620	0.000266
7621	0.000212
7622	0.000249
7623	0.000333
7624	0.000349
7625	0.000343
7626	0.000339
7627	0.00031
7628	0.000338
7629	0.000278
7630	0.000183
7631	0.000131
7632	0.000274
7633	0.000382
7634	0.000388
7635	0.000319
7636	0.000317
7637	0.000358
7638	0.00042
7639	0.000465
7640	0.000427
7641	0.000364
7642	0.000313
7643	0.000325
7644	0.000385
7645	0.000451
7646	0.00043
7647	0.000372
7648	0.000369
7649	0.000327
7650	0.000377
7651	0.000409
7652	0.000441
7653	0.000408
7654	0.000389
7655	0.000436
7656	0.00049
7657	0.000416
7658	0.000443
7659	0.000506
7660	0.000521
7661	0.000508
7662	0.000444
7663	0.000426
7664	0.000387
7665	0.000371
7666	0.000431
7667	0.00052
7668	0.000541
7669	0.000499
7670	0.000455
7671	0.000453
7672	0.000389
7673	0.000385
7674	0.000351
7675	0.000367
7676	0.000317
7677	0.000316
7678	0.000359
7679	0.000373
7680	0.000353
7681	0.000311
7682	0.00023
7683	0.000231
7684	0.000187
7685	0.000166
7686	0.000278
7687	0.00031
7688	0.000356
7689	0.000329
7690	0.000278
7691	0.000222
7692	0.000183
7693	0.000218
7694	0.000207
7695	0.000175
7696	0.000204
7697	0.000353
7698	0.000362
7699	0.000264
7700	0.000246
7701	0.000283
7702	0.000293
7703	0.000313
7704	0.00031
7705	0.000243
7706	0.000192
7707	0.000189
7708	0.000201
7709	0.000227
7710	0.000267
7711	0.000276
7712	0.000267
7713	0.000236
7714	0.000163
7715	0.000145
7716	0.000151
7717	0.000184
7718	0.000199
7719	0.000215
7720	0.00021
7721	0.00018
7722	0.00014
7723	0.00012
7724	0.000172
7725	0.000174
7726	0.000182
7727	0.000183
7728	0.00019
7729	0.000164
7730	0.000127
7731	5.5e-05
7732	2e-05
7733	2e-06
7734	-3e-05
7735	-7.4e-05
7736	-3.7e-05
7737	-4e-05
7738	-1.3e-05
7739	7.1e-05
7740	0.000105
7741	5.9e-05
7742	4.3e-05
7743	8.9e-05
7744	0.000203
7745	0.000205
7746	0.000211
7747	0.000225
7748	0.000251
7749	0.00021
7750	0.000226
7751	0.000265
7752	0.000197
7753	0.000126
7754	0.000158
7755	0.000171
7756	0.000169
7757	0.000172
7758	0.000195
7759	0.000217
7760	0.000246
7761	0.000195
7762	0.000237
7763	0.000266
7764	0.000247
7765	0.000173
7766	0.000153
7767	0.000129
7768	0.000159
7769	0.000182
7770	0.000274
7771	0.000305
7772	0.00029
7773	0.000313
7774	0.000335
7775	0.000324
7776	0.000304
7777	0.000294
7778	0.000405
7779	0.000369
7780	0.000279
7781	0.000192
7782	0.000163
7783	0.000175
7784	0.000178
7785	0.000187
7786	0.000263
7787	0.00028
7788	0.000254
7789	0.000272
7790	0.000235
7791	0.000205
7792	0.000215
7793	0.000338
7794	0.000377
7795	0.000349
7796	0.000378
7797	0.000413
7798	0.000385
7799	0.000332
7800	0.000354
7801	0.000364
7802	0.000343
7803	0.0003
7804	0.000326
7805	0.000369
7806	0.000372
7807	0.000297
7808	0.000295
7809	0.000352
7810	0.000383
7811	0.000339
7812	0.000292
7813	0.000338
7814	0.000309
7815	0.000338
7816	0.000396
7817	0.000447
7818	0.000398
7819	0.000389
7820	0.00037
7821	0.000336
7822	0.000329
7823	0.000347
7824	0.000334
7825	0.000301
7826	0.000301
7827	0.000312
7828	0.000305
7829	0.000284
7830	0.000292
7831	0.000332
7832	0.000391
7833	0.000428
7834	0.000418
7835	0.000431
7836	0.000466
7837	0.00047
7838	0.000407
7839	0.000397
7840	0.000431
7841	0.000453
7842	0.000488
7843	0.000452
7844	0.000481
7845	0.000476
7846	0.00055
7847	0.000581
7848	0.000569
7849	0.0005
7850	0.000445
7851	0.00042
7852	0.000416
7853	0.000406
7854	0.000398
7855	0.000409
7856	0.000458
7857	0.000523
7858	0.000541
7859	0.000483
7860	0.000423
7861	0.000432
7862	0.00044
7863	0.000413
7864	0.000395
7865	0.000458
7866	0.000459
7867	0.000436
7868	0.000404
7869	0.000416
7870	0.000392
7871	0.000252
7872	0.000191
7873	0.000213
7874	0.00028
7875	0.000261
7876	0.000272
7877	0.000353
7878	0.000411
7879	0.000416
7880	0.000354
7881	0.000327
7882	0.000332
7883	0.000307
7884	0.000295
7885	0.000265
7886	0.000295
7887	0.000294
7888	0.000268
7889	0.000266
7890	0.000268
7891	0.000339
7892	0.000369
7893	0.000301
7894	0.000259
7895	0.000322
7896	0.000368
7897	0.000345
7898	0.000337
7899	0.000309
7900	0.000253
7901	0.00024
7902	0.000286
7903	0.00027
7904	0.000256
7905	0.000213
7906	0.00013
7907	6e-05
7908	9e-05
7909	0.000143
7910	0.000168
7911	0.000171
7912	0.000225
7913	0.000267
7914	0.000268
7915	0.000155
7916	0.000162
7917	0.000198
7918	0.000133
7919	0.000128
7920	0.000142
7921	0.000167
7922	0.00014
7923	0.000141
7924	0.000117
7925	0.000106
7926	7.4e-05
7927	9.6e-05
7928	0.000128
7929	0.000145
7930	0.00016
7931	0.00018
7932	0.000191
7933	0.000158
7934	0.000124
7935	0.000161
7936	0.000161
7937	0.000106
7938	0.000113
7939	0.000119
7940	0.000143
7941	0.000101
7942	8.5e-05
7943	0.00012
7944	0.000132
7945	0.000144
7946	0.000175
7947	0.000158
7948	0.000129
7949	0.000125
7950	0.000122
7951	0.000145
7952	0.000183
7953	0.00017
7954	0.000144
7955	0.00015
7956	0.000165
7957	0.000166
7958	0.000193
7959	0.000198
7960	0.000163
7961	0.000134
7962	0.00016
7963	0.000173
7964	0.000112
7965	4e-05
7966	9.3e-05
7967	0.00016
7968	0.000158
7969	0.000131
7970	0.000152
7971	0.000181
7972	0.000255
7973	0.000299
7974	0.000303
7975	0.000232
7976	0.000237
7977	0.000257
7978	0.000265
7979	0.000242
7980	0.000232
7981	0.000293
7982	0.000328
7983	0.000314
7984	0.000275
7985	0.000204
7986	0.000176
7987	0.000187
7988	0.000268
7989	0.000245
7990	0.000216
7991	0.000239
7992	0.000246
7993	0.000287
7994	0.000313
7995	0.00034
7996	0.000303
7997	0.000292
7998	0.000313
[truncated: 3,401 more rows]

## Sheet: WT 0.45 M
Time	UV
6000	2.5
6001	2.5
6002	2.5
6003	2.5
6004	2.5
6005	2.5
6006	2.5
6007	2.5
6008	2.5
6009	2.5
6010	2.5
6011	2.5
6012	2.5
6013	2.5
6014	2.5
6015	2.5
6016	2.5
6017	2.5
6018	2.5
6019	2.5
6020	2.5
6021	2.5
6022	2.5
6023	2.5
6024	2.5
6025	2.5
6026	2.5
6027	2.5
6028	2.5
6029	2.5
6030	2.5
6031	2.5
6032	2.5
6033	2.5
6034	2.5
6035	2.5
6036	2.5
6037	2.5
6038	2.5
6039	2.5
6040	2.5
6041	2.5
6042	2.5
6043	2.5
6044	2.5
6045	2.5
6046	2.5
6047	2.5
6048	2.5
6049	2.5
6050	2.5
6051	2.5
6052	2.5
6053	2.5
6054	2.5
6055	2.5
6056	2.5
6057	2.5
6058	2.5
6059	2.5
6060	2.5
6061	2.5
6062	2.5
6063	2.5
6064	2.5
6065	2.5
6066	2.5
6067	2.5
6068	2.5
6069	2.5
6070	2.5
6071	2.5
6072	2.5
6073	2.5
6074	2.5
6075	2.5
6076	2.5
6077	2.5
6078	2.5
6079	2.5
6080	2.5
6081	2.5
6082	2.5
6083	2.5
6084	2.5
6085	2.5
6086	2.5
6087	2.5
6088	2.5
6089	2.5
6090	2.5
6091	2.5
6092	2.5
6093	2.5
6094	2.5
6095	2.5
6096	2.5
6097	2.5
6098	2.5
6099	2.5
6100	2.5
6101	2.5
6102	2.5
6103	2.5
6104	2.5
6105	2.5
6106	2.5
6107	2.5
6108	2.5
6109	2.5
6110	2.5
6111	2.5
6112	2.5
6113	2.5
6114	2.5
6115	2.5
6116	2.5
6117	2.5
6118	2.5
6119	2.5
6120	2.5
6121	2.5
6122	2.5
6123	2.5
6124	2.5
6125	2.5
6126	2.5
6127	2.5
6128	2.5
6129	2.5
6130	2.5
6131	2.5
6132	2.5
6133	2.5
6134	2.5
6135	2.5
6136	2.5
6137	2.5
6138	2.5
6139	2.5
6140	2.5
6141	2.5
6142	2.5
6143	2.5
6144	2.5
6145	2.5
6146	2.5
6147	2.5
6148	2.5
6149	2.5
6150	2.5
6151	2.5
6152	2.5
6153	2.5
6154	2.5
6155	2.5
6156	2.5
6157	2.5
6158	2.5
6159	2.5
6160	2.5
6161	2.5
6162	2.5
6163	2.5
6164	2.5
6165	2.5
6166	2.5
6167	2.5
6168	2.5
6169	2.5
6170	2.5
6171	2.5
6172	2.5
6173	2.5
6174	2.5
6175	2.5
6176	2.5
6177	2.5
6178	2.5
6179	2.5
6180	2.5
6181	2.5
6182	2.5
6183	2.5
6184	2.5
6185	2.5
6186	2.5
6187	2.5
6188	2.5
6189	2.5
6190	2.5
6191	2.5
6192	2.5
6193	2.5
6194	2.5
6195	2.5
6196	2.5
6197	2.5
6198	2.5
6199	2.5
6200	2.5
6201	2.5
6202	2.5
6203	2.5
6204	2.5
6205	2.5
6206	2.5
6207	2.5
6208	2.5
6209	2.5
6210	2.5
6211	2.5
6212	2.5
6213	2.5
6214	2.5
6215	2.5
6216	2.5
6217	2.5
6218	2.5
6219	2.5
6220	2.5
6221	2.5
6222	2.5
6223	2.5
6224	2.5
6225	2.5
6226	2.5
6227	2.5
6228	2.5
6229	2.5
6230	2.5
6231	2.5
6232	2.5
6233	2.5
6234	2.5
6235	2.5
6236	2.5
6237	2.5
6238	2.5
6239	0
6240	0
6241	-2e-05
6242	-2.8e-05
6243	-2e-06
6244	-3e-05
6245	-0.000194
6246	-0.000156
6247	-0.000106
6248	-0.000146
6249	-0.000124
6250	-4.2e-05
6251	-0.000132
6252	-0.00026
6253	-0.000357
6254	-0.000237
6255	-0.000218
6256	-0.000146
6257	-5.6e-05
6258	-4.1e-05
6259	-0.000125
6260	-0.000121
6261	-3.8e-05
6262	7.4e-05
6263	7.4e-05
6264	2.7e-05
6265	5.2e-05
6266	4.1e-05
6267	0.000108
6268	4.4e-05
6269	-0.00019
6270	-0.000221
6271	-0.000209
6272	-0.000125
6273	-6.6e-05
6274	-0.000114
6275	-0.000248
6276	-0.000333
6277	-0.000391
6278	-0.000498
6279	-0.000442
6280	-0.000416
6281	-0.000244
6282	-0.000137
6283	-0.000119
6284	-0.00012
6285	-0.000226
6286	-0.000209
6287	-0.000176
6288	-9e-06
6289	-1.8e-05
6290	-0.000174
6291	-0.000281
6292	-0.00033
6293	-0.000446
6294	-0.000491
6295	-0.000624
6296	-0.000772
6297	-0.000646
6298	-0.000543
6299	-0.000601
6300	-0.00072
6301	-0.000785
6302	-0.000896
6303	-0.000842
6304	-0.000971
6305	-0.000969
6306	-0.000934
6307	-0.000799
6308	-0.000665
6309	-0.000707
6310	-0.000767
6311	-0.000933
6312	-0.000946
6313	-0.000932
6314	-0.000963
6315	-0.001108
6316	-0.001286
6317	-0.001299
6318	-0.001203
6319	-0.001183
6320	-0.001053
6321	-0.001025
6322	-0.001199
6323	-0.001279
6324	-0.001145
6325	-0.001106
6326	-0.001142
6327	-0.001088
6328	-0.000957
6329	-0.001077
6330	-0.00124
6331	-0.001065
6332	-0.001041
6333	-0.001026
6334	-0.000983
6335	-0.001001
6336	-0.001093
6337	-0.001039
6338	-0.001148
6339	-0.001004
6340	-0.000814
6341	-0.000878
6342	-0.000937
6343	-0.000982
6344	-0.001113
6345	-0.001035
6346	-0.000743
6347	-0.000467
6348	-0.000457
6349	-0.000592
6350	-0.000602
6351	-0.000665
6352	-0.000823
6353	-0.000858
6354	-0.000839
6355	-0.000857
6356	-0.000897
6357	-0.000859
6358	-0.000796
6359	-0.000752
6360	-0.00058
6361	-0.000561
6362	-0.000582
6363	-0.000618
6364	-0.000625
6365	-0.000697
6366	-0.000681
6367	-0.000832
6368	-0.000795
6369	-0.000693
6370	-0.000537
6371	-0.000556
6372	-0.000745
6373	-0.000851
6374	-0.000799
6375	-0.000704
6376	-0.000811
6377	-0.000748
6378	-0.000665
6379	-0.000569
6380	-0.000648
6381	-0.00065
6382	-0.000606
6383	-0.000581
6384	-0.000477
6385	-0.000486
6386	-0.00056
6387	-0.000665
6388	-0.000728
6389	-0.000775
6390	-0.000926
6391	-0.000907
6392	-0.000792
6393	-0.000766
6394	-0.000759
6395	-0.000851
6396	-0.000915
6397	-0.000803
6398	-0.000771
6399	-0.000817
6400	-0.000846
6401	-0.000962
6402	-0.001083
6403	-0.001114
6404	-0.001063
6405	-0.001029
6406	-0.00095
6407	-0.000962
6408	-0.00107
6409	-0.001074
6410	-0.001026
6411	-0.001046
6412	-0.00104
6413	-0.000968
6414	-0.001021
6415	-0.000963
6416	-0.000831
6417	-0.000863
6418	-0.000993
6419	-0.000989
6420	-0.000957
6421	-0.000804
6422	-0.000732
6423	-0.000703
6424	-0.000743
6425	-0.000773
6426	-0.000888
6427	-0.000881
6428	-0.001044
6429	-0.001123
6430	-0.001117
6431	-0.001078
6432	-0.001007
6433	-0.000949
6434	-0.000969
6435	-0.000892
6436	-0.000839
6437	-0.000755
6438	-0.000912
6439	-0.001134
6440	-0.001285
6441	-0.001093
6442	-0.000972
6443	-0.000983
6444	-0.001142
6445	-0.001253
6446	-0.001214
6447	-0.000978
6448	-0.000806
6449	-0.000852
6450	-0.001051
6451	-0.001142
6452	-0.001009
6453	-0.000931
6454	-0.001048
6455	-0.001134
6456	-0.001141
6457	-0.001064
6458	-0.000947
6459	-0.000909
6460	-0.001092
6461	-0.001107
6462	-0.001028
6463	-0.00093
6464	-0.000957
6465	-0.000992
6466	-0.000996
6467	-0.000951
6468	-0.00102
6469	-0.001111
6470	-0.001114
6471	-0.001044
6472	-0.000938
6473	-0.000886
6474	-0.000924
6475	-0.000813
6476	-0.00083
6477	-0.000847
6478	-0.000879
6479	-0.000781
6480	-0.000755
6481	-0.000797
6482	-0.000939
6483	-0.001108
6484	-0.001102
6485	-0.001054
6486	-0.001015
6487	-0.001026
6488	-0.001072
6489	-0.001091
6490	-0.001059
6491	-0.001014
6492	-0.000864
6493	-0.000844
6494	-0.001009
6495	-0.001087
6496	-0.001091
6497	-0.001112
6498	-0.001047
6499	-0.000911
6500	-0.000966
6501	-0.001134
6502	-0.001207
6503	-0.001223
6504	-0.001345
6505	-0.001549
6506	-0.001575
6507	-0.00151
6508	-0.001471
6509	-0.00138
6510	-0.001341
6511	-0.001197
6512	-0.001145
6513	-0.001231
6514	-0.001459
6515	-0.001568
6516	-0.00147
6517	-0.001242
6518	-0.0012
6519	-0.001378
6520	-0.001455
6521	-0.001389
6522	-0.001325
6523	-0.001375
6524	-0.001331
6525	-0.001349
6526	-0.001275
6527	-0.001314
6528	-0.001269
6529	-0.001291
6530	-0.00135
6531	-0.001334
6532	-0.001255
6533	-0.001256
6534	-0.001283
6535	-0.001392
6536	-0.001469
6537	-0.001391
6538	-0.001362
6539	-0.001306
6540	-0.001336
6541	-0.001452
6542	-0.001478
6543	-0.001328
6544	-0.00129
6545	-0.001299
6546	-0.001378
6547	-0.00151
6548	-0.001476
6549	-0.001282
6550	-0.001098
6551	-0.001137
6552	-0.0012
6553	-0.001184
6554	-0.001041
6555	-0.001052
6556	-0.001274
6557	-0.001409
6558	-0.001344
6559	-0.001199
6560	-0.001172
6561	-0.001151
6562	-0.001062
6563	-0.001031
6564	-0.001219
6565	-0.001298
6566	-0.00135
6567	-0.001257
6568	-0.001273
6569	-0.001291
6570	-0.001365
6571	-0.0015
6572	-0.001597
6573	-0.001677
6574	-0.001617
6575	-0.001488
6576	-0.001378
6577	-0.001323
6578	-0.001206
6579	-0.00127
6580	-0.001452
6581	-0.001402
6582	-0.001401
6583	-0.001318
6584	-0.001318
6585	-0.001195
6586	-0.001151
6587	-0.001016
6588	-0.001199
6589	-0.001338
6590	-0.001407
6591	-0.001281
6592	-0.001198
6593	-0.001298
6594	-0.001302
6595	-0.001117
6596	-0.001161
6597	-0.001284
6598	-0.00125
6599	-0.001238
6600	-0.001337
6601	-0.001335
6602	-0.001303
6603	-0.001286
6604	-0.001411
6605	-0.001501
6606	-0.001471
6607	-0.001375
6608	-0.001362
6609	-0.001406
6610	-0.00145
6611	-0.001398
6612	-0.001283
6613	-0.001416
6614	-0.00151
6615	-0.001496
6616	-0.001396
6617	-0.001357
6618	-0.001333
6619	-0.001362
6620	-0.001314
6621	-0.001289
6622	-0.001309
6623	-0.001421
6624	-0.001351
6625	-0.001219
6626	-0.001222
6627	-0.001255
6628	-0.001286
6629	-0.001248
6630	-0.001302
6631	-0.001351
6632	-0.001434
6633	-0.001357
6634	-0.001251
6635	-0.001148
6636	-0.001289
6637	-0.001353
6638	-0.001221
6639	-0.001221
6640	-0.001169
6641	-0.001133
6642	-0.001184
6643	-0.001262
6644	-0.000956
6645	-0.000791
6646	-0.000928
6647	-0.001269
6648	-0.001466
6649	-0.001473
6650	-0.00148
6651	-0.001405
6652	-0.001372
6653	-0.001364
6654	-0.00137
6655	-0.001202
6656	-0.001126
6657	-0.001123
6658	-0.00122
6659	-0.001424
6660	-0.001552
6661	-0.001504
6662	-0.001463
6663	-0.001366
6664	-0.001264
6665	-0.001259
6666	-0.001231
6667	-0.001135
6668	-0.001153
6669	-0.001159
6670	-0.001243
6671	-0.001406
6672	-0.001373
6673	-0.001332
6674	-0.001378
6675	-0.001443
6676	-0.001282
6677	-0.001178
6678	-0.00117
6679	-0.001283
6680	-0.00139
6681	-0.00129
6682	-0.001169
6683	-0.001133
6684	-0.001151
6685	-0.001141
6686	-0.001209
6687	-0.001126
6688	-0.001124
6689	-0.001212
6690	-0.001344
6691	-0.001232
6692	-0.00118
6693	-0.001087
6694	-0.001068
6695	-0.001076
6696	-0.001149
6697	-0.001144
6698	-0.001047
6699	-0.001006
6700	-0.00109
6701	-0.001198
6702	-0.001232
6703	-0.001198
6704	-0.001091
6705	-0.001055
6706	-0.001116
6707	-0.001232
6708	-0.001258
6709	-0.001099
6710	-0.001096
6711	-0.001041
6712	-0.001033
6713	-0.00091
6714	-0.000701
6715	-0.000598
6716	-0.000564
6717	-0.000607
6718	-0.000623
6719	-0.000453
6720	-0.000472
6721	-0.000607
6722	-0.000759
6723	-0.000906
6724	-0.001037
6725	-0.000973
6726	-0.000916
6727	-0.000793
6728	-0.000766
6729	-0.000782
6730	-0.000854
6731	-0.00091
6732	-0.000977
6733	-0.001018
6734	-0.000939
6735	-0.000814
6736	-0.000933
6737	-0.000988
6738	-0.00095
6739	-0.000944
6740	-0.000907
6741	-0.000902
6742	-0.00106
6743	-0.001041
6744	-0.001131
6745	-0.001068
6746	-0.000976
6747	-0.00087
6748	-0.000837
6749	-0.000899
6750	-0.000922
6751	-0.001016
6752	-0.001039
6753	-0.001017
6754	-0.000981
6755	-0.00099
6756	-0.000913
6757	-0.00102
6758	-0.001072
6759	-0.001096
6760	-0.001116
6761	-0.001165
6762	-0.001043
6763	-0.000959
6764	-0.000923
6765	-0.000902
6766	-0.001015
6767	-0.001001
6768	-0.000756
6769	-0.000661
6770	-0.000874
6771	-0.000943
6772	-0.000898
6773	-0.000868
6774	-0.000959
6775	-0.001015
6776	-0.000923
6777	-0.000903
6778	-0.000823
6779	-0.000595
6780	-0.00059
6781	-0.000777
6782	-0.001034
6783	-0.000991
6784	-0.000924
6785	-0.000969
6786	-0.001026
6787	-0.001134
6788	-0.001173
6789	-0.000956
6790	-0.000816
6791	-0.000804
6792	-0.000953
6793	-0.001179
6794	-0.001252
6795	-0.001196
6796	-0.001067
6797	-0.000995
6798	-0.001074
6799	-0.001056
6800	-0.001008
6801	-0.000988
6802	-0.000951
6803	-0.000948
6804	-0.000984
6805	-0.000962
6806	-0.000943
6807	-0.000999
6808	-0.001081
6809	-0.001066
6810	-0.001065
6811	-0.001054
6812	-0.001098
6813	-0.001098
6814	-0.001181
6815	-0.001111
6816	-0.000925
6817	-0.000889
6818	-0.001015
6819	-0.000964
6820	-0.000926
6821	-0.001004
6822	-0.001087
6823	-0.001155
6824	-0.001271
6825	-0.00114
6826	-0.001133
6827	-0.001232
6828	-0.001319
6829	-0.001373
6830	-0.001359
6831	-0.00139
6832	-0.001304
6833	-0.001201
6834	-0.001149
6835	-0.001144
6836	-0.001134
6837	-0.001169
6838	-0.001038
6839	-0.001004
6840	-0.001003
6841	-0.000973
6842	-0.00092
6843	-0.000996
6844	-0.000978
6845	-0.000955
6846	-0.001124
6847	-0.001203
6848	-0.001253
6849	-0.001353
6850	-0.001487
6851	-0.001464
6852	-0.001378
6853	-0.001019
6854	-0.000899
6855	-0.001035
6856	-0.001158
6857	-0.00117
6858	-0.001173
6859	-0.001183
6860	-0.001135
6861	-0.001197
6862	-0.001383
6863	-0.001492
6864	-0.001376
6865	-0.001241
6866	-0.001168
6867	-0.001157
6868	-0.001138
6869	-0.001033
6870	-0.001111
6871	-0.001117
6872	-0.001062
6873	-0.001013
6874	-0.000999
6875	-0.001114
6876	-0.0011
6877	-0.001104
6878	-0.001027
6879	-0.000959
6880	-0.000804
6881	-0.000698
6882	-0.000749
6883	-0.000877
6884	-0.000827
6885	-0.000812
6886	-0.000889
6887	-0.001021
6888	-0.001058
6889	-0.001044
6890	-0.000938
6891	-0.000989
6892	-0.001062
6893	-0.001249
6894	-0.001324
6895	-0.001304
6896	-0.001214
6897	-0.001159
6898	-0.001078
6899	-0.000982
6900	-0.001006
6901	-0.001149
6902	-0.001267
6903	-0.001303
6904	-0.001248
6905	-0.001177
6906	-0.001121
6907	-0.001092
6908	-0.001118
6909	-0.001186
6910	-0.001219
6911	-0.001049
6912	-0.000895
6913	-0.000972
6914	-0.001074
6915	-0.001063
6916	-0.000932
6917	-0.000846
6918	-0.000727
6919	-0.000744
6920	-0.001002
6921	-0.0011
6922	-0.000922
6923	-0.000937
6924	-0.001064
6925	-0.001117
6926	-0.001042
6927	-0.000971
6928	-0.000851
6929	-0.000781
6930	-0.000798
6931	-0.000751
6932	-0.000769
6933	-0.000722
6934	-0.000616
6935	-0.000452
6936	-0.000457
6937	-0.000556
6938	-0.000495
6939	-0.000394
6940	-0.000441
6941	-0.000548
6942	-0.000465
6943	-0.000405
6944	-0.000267
6945	-0.000267
6946	-0.000378
6947	-0.000436
6948	-0.000366
6949	-0.000364
6950	-0.000478
6951	-0.000654
6952	-0.000604
6953	-0.000514
6954	-0.00041
6955	-0.000276
6956	-0.000365
6957	-0.000286
6958	-0.000117
6959	-0.000158
6960	-0.000189
6961	-0.000351
6962	-0.000485
6963	-0.000506
6964	-0.000435
6965	-0.000353
6966	-0.000264
6967	-0.000327
6968	-0.000402
6969	-0.000353
6970	-0.000272
6971	-0.000185
6972	-0.000164
6973	-0.000239
6974	-0.000287
6975	-0.000281
6976	-0.00036
6977	-0.000355
6978	-0.000357
6979	-0.000307
6980	-0.00027
6981	-0.000188
6982	-0.000197
6983	-0.00019
6984	-0.000243
6985	-0.000269
6986	-0.000237
6987	-0.000247
6988	-0.000223
6989	-0.000207
6990	-0.000298
6991	-0.000343
6992	-0.000366
6993	-0.000403
6994	-0.000362
6995	-0.000327
6996	-0.000372
6997	-0.000569
6998	-0.000607
6999	-0.000476
7000	-0.000359
7001	-0.000322
7002	-0.000273
7003	-0.000278
7004	-0.000265
7005	-0.000416
7006	-0.000451
7007	-0.000353
7008	-0.000171
7009	-0.000165
7010	-0.000182
7011	-0.000259
7012	-0.000373
7013	-0.000359
7014	-0.000232
7015	-0.000229
7016	-0.000359
7017	-0.000412
7018	-0.000345
7019	-0.000115
7020	-8.3e-05
7021	-0.000125
7022	-0.000203
7023	-9.5e-05
7024	-5.4e-05
7025	2.8e-05
7026	1.1e-05
7027	0.000124
7028	8.4e-05
7029	0.000125
7030	0.000124
7031	0
7032	-0.000132
7033	-0.000293
7034	-0.000272
7035	-0.000232
7036	-0.000145
7037	-0.000107
7038	-0.000138
7039	-0.000293
7040	-0.000395
7041	-0.000393
7042	-0.000419
7043	-0.000393
7044	-0.000324
7045	-0.000379
7046	-0.00048
7047	-0.000617
7048	-0.000616
7049	-0.000501
7050	-0.000512
7051	-0.000463
7052	-0.000404
7053	-0.000306
7054	-0.000197
7055	-0.000106
7056	-0.00018
7057	-0.000292
7058	-0.000399
7059	-0.000373
7060	-0.000288
7061	-0.000347
7062	-0.000488
7063	-0.000549
7064	-0.000503
7065	-0.000508
7066	-0.000325
7067	-0.000173
7068	-0.000264
7069	-0.000408
7070	-0.000347
7071	-0.000412
7072	-0.000474
7073	-0.000538
7074	-0.000452
7075	-0.000189
7076	-0.00013
7077	-7.7e-05
7078	1e-06
7079	7.8e-05
7080	0.00017
7081	0.000317
7082	0.000183
7083	0.000117
7084	0.000145
7085	-4.8e-05
7086	-0.000225
7087	-0.000189
7088	-0.000158
7089	-0.000279
7090	-0.000504
7091	-0.000461
7092	-0.000265
7093	-0.000225
7094	-0.000392
7095	-0.000661
7096	-0.00105
7097	-0.001204
7098	-0.001173
7099	-0.001195
7100	-0.001101
7101	-0.001022
7102	-0.000996
7103	-0.000999
7104	-0.001033
7105	-0.001076
7106	-0.001019
7107	-0.000995
7108	-0.001084
7109	-0.001204
7110	-0.001208
7111	-0.000964
7112	-0.0008
7113	-0.000916
7114	-0.000867
7115	-0.000827
7116	-0.000919
7117	-0.000885
7118	-0.000862
7119	-0.000925
7120	-0.000866
7121	-0.000746
7122	-0.000742
7123	-0.000826
7124	-0.000849
7125	-0.000745
7126	-0.000665
7127	-0.000735
7128	-0.000802
7129	-0.000763
7130	-0.000699
7131	-0.00088
7132	-0.000945
7133	-0.000842
7134	-0.000654
7135	-0.000697
7136	-0.000867
7137	-0.000909
7138	-0.000845
7139	-0.000705
7140	-0.0009
7141	-0.001112
7142	-0.001156
7143	-0.001036
7144	-0.000838
7145	-0.000808
7146	-0.000755
7147	-0.000842
7148	-0.000891
7149	-0.000757
7150	-0.000715
7151	-0.000662
7152	-0.000702
7153	-0.000946
7154	-0.001179
7155	-0.001258
7156	-0.001186
7157	-0.001021
7158	-0.000853
7159	-0.000881
7160	-0.001053
7161	-0.001146
7162	-0.001239
7163	-0.001288
7164	-0.001234
7165	-0.001161
7166	-0.001126
7167	-0.001208
7168	-0.001154
7169	-0.001359
7170	-0.001343
7171	-0.001242
7172	-0.001282
7173	-0.001267
7174	-0.001236
7175	-0.001236
7176	-0.001287
7177	-0.00115
7178	-0.000947
7179	-0.001114
7180	-0.001396
7181	-0.001338
7182	-0.001294
7183	-0.001393
7184	-0.001496
7185	-0.001477
7186	-0.001317
7187	-0.001235
7188	-0.001223
7189	-0.001234
7190	-0.001214
7191	-0.001189
7192	-0.001356
7193	-0.001356
7194	-0.001237
7195	-0.001186
7196	-0.001282
7197	-0.001163
7198	-0.001146
7199	-0.001201
7200	-0.001254
7201	-0.001307
7202	-0.00124
7203	-0.001333
7204	-0.001414
7205	-0.001344
7206	-0.001453
7207	-0.001456
7208	-0.001495
7209	-0.001425
7210	-0.001302
7211	-0.001301
7212	-0.001315
7213	-0.00123
7214	-0.001136
7215	-0.001044
7216	-0.001122
7217	-0.001141
7218	-0.00122
7219	-0.001419
7220	-0.001461
7221	-0.001289
7222	-0.001237
7223	-0.001188
7224	-0.001133
7225	-0.001161
7226	-0.00128
7227	-0.00136
7228	-0.001456
7229	-0.001357
7230	-0.001259
7231	-0.001276
7232	-0.001377
7233	-0.001514
7234	-0.001564
7235	-0.001589
7236	-0.001528
7237	-0.0015
7238	-0.001452
7239	-0.001446
7240	-0.001508
7241	-0.001595
7242	-0.001569
7243	-0.00159
7244	-0.0016
7245	-0.001568
7246	-0.001498
7247	-0.001461
7248	-0.00139
7249	-0.001383
7250	-0.001571
7251	-0.001645
7252	-0.001547
7253	-0.001465
7254	-0.001412
7255	-0.001278
7256	-0.001305
7257	-0.001367
7258	-0.001247
7259	-0.001152
7260	-0.00123
7261	-0.00126
7262	-0.001195
7263	-0.001206
7264	-0.001326
7265	-0.001444
7266	-0.001374
7267	-0.001365
7268	-0.001286
7269	-0.001098
7270	-0.001043
7271	-0.001295
7272	-0.001418
7273	-0.00153
7274	-0.001668
7275	-0.00155
7276	-0.001425
7277	-0.001301
7278	-0.001411
7279	-0.001494
7280	-0.001619
7281	-0.001699
7282	-0.001761
7283	-0.00174
7284	-0.00163
7285	-0.001447
7286	-0.001508
7287	-0.001642
7288	-0.001742
7289	-0.001694
7290	-0.001669
7291	-0.001751
7292	-0.001779
7293	-0.001723
7294	-0.001668
7295	-0.00167
7296	-0.001651
7297	-0.001601
7298	-0.001581
7299	-0.001577
7300	-0.001495
7301	-0.001519
7302	-0.00164
7303	-0.001652
7304	-0.001624
7305	-0.00157
7306	-0.001609
7307	-0.001605
7308	-0.001667
7309	-0.001706
7310	-0.001531
7311	-0.001403
7312	-0.001484
7313	-0.001649
7314	-0.001536
7315	-0.001483
7316	-0.001495
7317	-0.001458
7318	-0.001549
7319	-0.001509
7320	-0.001451
7321	-0.001301
7322	-0.001257
7323	-0.001332
7324	-0.00145
7325	-0.001421
7326	-0.001291
7327	-0.001259
7328	-0.001351
7329	-0.001462
7330	-0.001415
7331	-0.001344
7332	-0.001297
7333	-0.001377
7334	-0.001525
7335	-0.001573
7336	-0.001494
7337	-0.001551
7338	-0.001673
7339	-0.001661
7340	-0.001612
7341	-0.001763
7342	-0.001644
7343	-0.001492
7344	-0.001434
7345	-0.001374
7346	-0.001418
7347	-0.001559
7348	-0.001674
7349	-0.00157
7350	-0.001399
7351	-0.001421
7352	-0.001528
7353	-0.001546
7354	-0.001438
7355	-0.00132
7356	-0.001405
7357	-0.00152
7358	-0.00148
7359	-0.001375
7360	-0.001351
7361	-0.001349
7362	-0.001431
7363	-0.001615
7364	-0.001636
7365	-0.001649
7366	-0.001614
7367	-0.001582
7368	-0.00162
7369	-0.00155
7370	-0.001353
7371	-0.001346
7372	-0.001457
7373	-0.001471
7374	-0.001347
7375	-0.001425
7376	-0.001477
7377	-0.001474
7378	-0.001518
7379	-0.001527
7380	-0.001579
7381	-0.001518
7382	-0.001488
7383	-0.001466
7384	-0.001526
7385	-0.001432
7386	-0.001437
7387	-0.001505
7388	-0.001516
7389	-0.001432
7390	-0.001317
7391	-0.001289
7392	-0.001184
7393	-0.001128
7394	-0.001305
7395	-0.001333
7396	-0.001281
7397	-0.001104
7398	-0.001237
7399	-0.00116
7400	-0.001138
7401	-0.001285
7402	-0.001287
7403	-0.001174
7404	-0.001188
7405	-0.001286
7406	-0.001165
7407	-0.001067
7408	-0.001031
7409	-0.000972
7410	-0.00111
7411	-0.001026
7412	-0.000741
7413	-0.000798
7414	-0.001008
7415	-0.001029
7416	-0.000963
7417	-0.000901
7418	-0.000865
7419	-0.000983
7420	-0.001115
7421	-0.001101
7422	-0.001135
7423	-0.001014
7424	-0.000977
7425	-0.000998
7426	-0.001041
7427	-0.001058
7428	-0.000963
7429	-0.000904
7430	-0.000896
7431	-0.000988
7432	-0.001016
7433	-0.000883
7434	-0.000766
7435	-0.000836
7436	-0.00094
7437	-0.000844
7438	-0.000829
7439	-0.000911
7440	-0.000959
7441	-0.000959
7442	-0.000874
7443	-0.000834
7444	-0.000758
7445	-0.001032
7446	-0.001353
7447	-0.001187
7448	-0.001102
7449	-0.001183
7450	-0.001192
7451	-0.001188
7452	-0.001222
7453	-0.0011
7454	-0.000977
7455	-0.001077
7456	-0.00128
7457	-0.001393
7458	-0.00129
7459	-0.001307
7460	-0.001273
7461	-0.001174
7462	-0.001242
7463	-0.001483
7464	-0.001603
7465	-0.001443
7466	-0.001191
7467	-0.001248
7468	-0.001353
7469	-0.001517
7470	-0.001518
7471	-0.001456
7472	-0.00141
7473	-0.001464
7474	-0.00148
7475	-0.001403
7476	-0.00129
7477	-0.00126
7478	-0.001314
7479	-0.001336
7480	-0.001319
7481	-0.001381
7482	-0.00138
7483	-0.001293
7484	-0.001274
7485	-0.001304
7486	-0.00119
7487	-0.001109
7488	-0.001179
7489	-0.001257
7490	-0.001195
7491	-0.001196
7492	-0.001078
7493	-0.001192
7494	-0.001455
7495	-0.001439
7496	-0.001207
7497	-0.001184
7498	-0.001246
7499	-0.001322
7500	-0.00129
7501	-0.001344
7502	-0.00133
7503	-0.001223
7504	-0.001308
7505	-0.001428
7506	-0.001437
7507	-0.001385
7508	-0.001391
7509	-0.001448
7510	-0.001439
7511	-0.001494
7512	-0.001454
7513	-0.00133
7514	-0.001355
7515	-0.001355
7516	-0.001401
7517	-0.001373
7518	-0.001452
7519	-0.001486
7520	-0.001467
7521	-0.001511
7522	-0.001499
7523	-0.001411
7524	-0.001312
7525	-0.001392
7526	-0.001503
7527	-0.00146
7528	-0.001433
7529	-0.001418
7530	-0.001344
7531	-0.00122
7532	-0.001361
7533	-0.001435
7534	-0.001356
7535	-0.001312
7536	-0.001543
7537	-0.001625
7538	-0.001483
7539	-0.001426
7540	-0.001492
7541	-0.001548
7542	-0.001607
7543	-0.001593
7544	-0.001601
7545	-0.001537
7546	-0.001488
7547	-0.001583
7548	-0.001734
7549	-0.001676
7550	-0.001545
7551	-0.00144
7552	-0.001422
7553	-0.001611
7554	-0.001586
7555	-0.001435
7556	-0.001346
7557	-0.001577
7558	-0.001681
7559	-0.001735
7560	-0.001613
7561	-0.001667
7562	-0.00163
7563	-0.001574
7564	-0.00159
7565	-0.001692
7566	-0.001672
7567	-0.001655
7568	-0.001779
7569	-0.001804
7570	-0.001725
7571	-0.001616
7572	-0.001662
7573	-0.00164
7574	-0.00166
7575	-0.001751
7576	-0.001719
7577	-0.001671
7578	-0.001688
7579	-0.001827
7580	-0.001845
7581	-0.001793
7582	-0.001732
7583	-0.001669
7584	-0.001608
7585	-0.001708
7586	-0.001707
7587	-0.001771
7588	-0.001674
7589	-0.001581
7590	-0.001627
7591	-0.001698
7592	-0.001572
7593	-0.001422
7594	-0.00161
7595	-0.001759
7596	-0.001805
7597	-0.001753
7598	-0.001606
7599	-0.001541
7600	-0.00161
7601	-0.0018
7602	-0.001893
7603	-0.001829
7604	-0.00187
7605	-0.001835
7606	-0.001946
7607	-0.002
7608	-0.002036
7609	-0.001955
7610	-0.00183
7611	-0.001811
7612	-0.001813
7613	-0.001784
7614	-0.001639
7615	-0.001507
7616	-0.00153
7617	-0.001686
7618	-0.001581
7619	-0.00165
7620	-0.001578
7621	-0.001522
7622	-0.001579
7623	-0.001716
7624	-0.001702
7625	-0.001586
7626	-0.001577
7627	-0.001552
7628	-0.001515
7629	-0.001463
7630	-0.001397
7631	-0.001342
7632	-0.001329
7633	-0.001447
7634	-0.00136
7635	-0.001314
7636	-0.001526
7637	-0.001585
7638	-0.001591
7639	-0.001699
7640	-0.001658
7641	-0.001548
7642	-0.001509
7643	-0.001388
7644	-0.001303
7645	-0.001278
7646	-0.00134
7647	-0.001373
7648	-0.001419
7649	-0.00139
7650	-0.001354
7651	-0.001434
7652	-0.001333
7653	-0.001306
7654	-0.001423
7655	-0.001471
7656	-0.001361
7657	-0.001139
7658	-0.001043
7659	-0.001029
7660	-0.001112
7661	-0.001003
7662	-0.00087
7663	-0.000765
7664	-0.000849
7665	-0.001049
7666	-0.00113
7667	-0.001138
7668	-0.00118
7669	-0.001129
7670	-0.001187
7671	-0.00125
7672	-0.001145
7673	-0.000943
7674	-0.000978
7675	-0.001136
7676	-0.001044
7677	-0.001047
7678	-0.001221
7679	-0.001251
7680	-0.001224
7681	-0.001311
7682	-0.001233
7683	-0.001145
7684	-0.001137
7685	-0.001242
7686	-0.001238
7687	-0.001185
7688	-0.001191
7689	-0.001165
7690	-0.001197
7691	-0.00117
7692	-0.001182
7693	-0.001172
7694	-0.000957
7695	-0.001032
7696	-0.001095
7697	-0.000984
7698	-0.001004
7699	-0.001058
7700	-0.00099
7701	-0.000996
7702	-0.001072
7703	-0.001104
7704	-0.001121
7705	-0.001027
7706	-0.001017
7707	-0.00108
7708	-0.001189
7709	-0.001137
7710	-0.000999
7711	-0.000987
7712	-0.000927
7713	-0.000941
7714	-0.001149
7715	-0.001165
7716	-0.001064
7717	-0.000931
7718	-0.000957
7719	-0.001036
7720	-0.000928
7721	-0.000828
7722	-0.00082
7723	-0.000948
7724	-0.001038
7725	-0.000971
7726	-0.000937
7727	-0.001023
7728	-0.001212
7729	-0.001354
7730	-0.001284
7731	-0.001215
7732	-0.001077
7733	-0.00087
7734	-0.000895
7735	-0.001039
7736	-0.001063
7737	-0.001032
7738	-0.000975
7739	-0.001047
7740	-0.001009
7741	-0.000875
7742	-0.000911
7743	-0.00102
7744	-0.001108
7745	-0.000994
7746	-0.000826
7747	-0.000826
7748	-0.000856
7749	-0.000939
7750	-0.001082
7751	-0.001166
7752	-0.001092
7753	-0.001097
7754	-0.001148
7755	-0.001303
7756	-0.001314
7757	-0.0012
7758	-0.001165
7759	-0.001204
7760	-0.001124
7761	-0.001162
7762	-0.001274
7763	-0.001334
7764	-0.001243
7765	-0.00116
7766	-0.001095
7767	-0.001056
7768	-0.001017
7769	-0.001043
7770	-0.001025
7771	-0.000825
7772	-0.000787
7773	-0.000902
7774	-0.00095
7775	-0.000934
7776	-0.000885
7777	-0.000849
7778	-0.000888
7779	-0.00086
7780	-0.000898
7781	-0.000791
7782	-0.00081
7783	-0.000857
7784	-0.000826
7785	-0.000726
7786	-0.000506
7787	-0.000548
7788	-0.000731
7789	-0.000829
7790	-0.000983
7791	-0.00095
7792	-0.001027
7793	-0.001141
7794	-0.001223
7795	-0.001035
7796	-0.001047
7797	-0.001204
7798	-0.001187
7799	-0.001167
7800	-0.001122
7801	-0.001067
7802	-0.00096
7803	-0.001014
7804	-0.001064
7805	-0.001099
7806	-0.001021
7807	-0.000976
7808	-0.000997
7809	-0.000867
7810	-0.000761
7811	-0.000721
7812	-0.000785
7813	-0.000916
7814	-0.000986
7815	-0.000968
7816	-0.001107
7817	-0.001103
7818	-0.000948
7819	-0.000866
7820	-0.001054
7821	-0.001116
7822	-0.000994
7823	-0.000847
7824	-0.001028
7825	-0.001157
7826	-0.001111
7827	-0.000961
7828	-0.000906
7829	-0.000846
7830	-0.000924
7831	-0.000975
7832	-0.000944
7833	-0.000913
7834	-0.000921
7835	-0.000926
7836	-0.001042
7837	-0.001117
7838	-0.001069
7839	-0.001078
7840	-0.001196
7841	-0.001294
7842	-0.001365
7843	-0.001218
7844	-0.001103
7845	-0.00106
7846	-0.000993
7847	-0.000976
7848	-0.00097
7849	-0.001002
7850	-0.001061
7851	-0.001148
7852	-0.001241
7853	-0.001371
7854	-0.001367
7855	-0.001225
7856	-0.001243
7857	-0.001309
7858	-0.001251
7859	-0.001235
7860	-0.001265
7861	-0.001294
7862	-0.001169
7863	-0.001101
7864	-0.001148
7865	-0.001221
7866	-0.001276
7867	-0.001308
7868	-0.001185
7869	-0.001265
7870	-0.001358
7871	-0.001279
7872	-0.001345
7873	-0.001403
7874	-0.00143
7875	-0.001372
7876	-0.001417
7877	-0.001567
7878	-0.001699
7879	-0.001796
7880	-0.001755
7881	-0.001694
7882	-0.001596
7883	-0.001498
7884	-0.001424
7885	-0.001552
7886	-0.001522
7887	-0.001408
7888	-0.001453
7889	-0.001456
7890	-0.001338
7891	-0.001233
7892	-0.001249
7893	-0.001344
7894	-0.001408
7895	-0.001375
7896	-0.001286
7897	-0.001237
7898	-0.001306
7899	-0.001378
7900	-0.001408
7901	-0.0013
7902	-0.001175
7903	-0.001253
7904	-0.001315
7905	-0.00131
7906	-0.001339
7907	-0.001376
7908	-0.001162
7909	-0.000996
7910	-0.000983
7911	-0.000952
7912	-0.001023
7913	-0.00103
7914	-0.000999
7915	-0.001118
7916	-0.001275
7917	-0.001301
7918	-0.001205
7919	-0.001101
7920	-0.001117
7921	-0.001208
7922	-0.001397
7923	-0.001434
7924	-0.001319
7925	-0.0011
7926	-0.001077
7927	-0.001097
7928	-0.001152
7929	-0.001239
7930	-0.001264
7931	-0.00124
7932	-0.001197
7933	-0.001192
7934	-0.001157
7935	-0.001062
7936	-0.001133
7937	-0.001237
7938	-0.001255
7939	-0.00118
7940	-0.001218
7941	-0.001354
7942	-0.001345
7943	-0.00121
7944	-0.001107
7945	-0.001125
7946	-0.001223
7947	-0.001209
7948	-0.001166
7949	-0.001159
7950	-0.001277
7951	-0.001247
7952	-0.001258
7953	-0.001149
7954	-0.000952
7955	-0.000927
7956	-0.001027
7957	-0.001126
7958	-0.001085
7959	-0.000973
7960	-0.000974
7961	-0.001096
7962	-0.001157
7963	-0.001245
7964	-0.001436
7965	-0.001502
7966	-0.001429
7967	-0.001373
7968	-0.001208
7969	-0.00109
7970	-0.001194
7971	-0.001146
7972	-0.001091
7973	-0.001113
7974	-0.001155
7975	-0.001193
7976	-0.001245
7977	-0.001215
7978	-0.001177
7979	-0.001189
7980	-0.001241
7981	-0.001163
7982	-0.001134
7983	-0.00118
7984	-0.001301
7985	-0.001271
7986	-0.001253
7987	-0.001345
7988	-0.001239
7989	-0.001176
7990	-0.001187
7991	-0.001213
7992	-0.001221
7993	-0.001106
7994	-0.00114
7995	-0.001152
7996	-0.001093
7997	-0.001015
7998	-0.00109
[truncated: 3,401 more rows]

## Sheet: WT 0.15 M
Time	UV
6000	-0.000658
6001	-0.000704
6002	-0.000703
6003	-0.000706
6004	-0.000673
6005	-0.0006
6006	-0.000591
6007	-0.000624
6008	-0.00066
6009	-0.000627
6010	-0.000646
6011	-0.000671
6012	-0.000644
6013	-0.000656
6014	-0.000648
6015	-0.000648
6016	-0.000599
6017	-0.00056
6018	-0.000572
6019	-0.000626
6020	-0.00061
6021	-0.000599
6022	-0.000622
6023	-0.00065
6024	-0.000576
6025	-0.000588
6026	-0.000611
6027	-0.000612
6028	-0.000661
6029	-0.00074
6030	-0.000747
6031	-0.000694
6032	-0.000535
6033	-0.00053
6034	-0.000605
6035	-0.000628
6036	-0.000585
6037	-0.000526
6038	-0.000554
6039	-0.000611
6040	-0.000631
6041	-0.000621
6042	-0.000592
6043	-0.000585
6044	-0.000565
6045	-0.000609
6046	-0.000636
6047	-0.000654
6048	-0.000618
6049	-0.000585
6050	-0.00059
6051	-0.000572
6052	-0.000529
6053	-0.000541
6054	-0.000548
6055	-0.00062
6056	-0.000638
6057	-0.00065
6058	-0.000616
6059	-0.000578
6060	-0.000561
6061	-0.000605
6062	-0.000567
6063	-0.00055
6064	-0.000519
6065	-0.000472
6066	-0.000453
6067	-0.000472
6068	-0.000521
6069	-0.000556
6070	-0.000511
6071	-0.000487
6072	-0.00051
6073	-0.00051
6074	-0.000453
6075	-0.000444
6076	-0.000498
6077	-0.000538
6078	-0.000532
6079	-0.00051
6080	-0.000494
6081	-0.000469
6082	-0.000489
6083	-0.000515
6084	-0.000508
6085	-0.000509
6086	-0.000496
6087	-0.000499
6088	-0.000461
6089	-0.000481
6090	-0.000475
6091	-0.000452
6092	-0.000513
6093	-0.000561
6094	-0.000585
6095	-0.000525
6096	-0.000521
6097	-0.000597
6098	-0.000591
6099	-0.00056
6100	-0.000481
6101	-0.000461
6102	-0.000464
6103	-0.000461
6104	-0.000524
6105	-0.000578
6106	-0.000615
6107	-0.000619
6108	-0.000584
6109	-0.000558
6110	-0.000631
6111	-0.000694
6112	-0.000668
6113	-0.000566
6114	-0.000526
6115	-0.000539
6116	-0.000571
6117	-0.000525
6118	-0.000453
6119	-0.000482
6120	-0.000552
6121	-0.000528
6122	-0.00055
6123	-0.000563
6124	-0.000574
6125	-0.000624
6126	-0.000612
6127	-0.000556
6128	-0.000541
6129	-0.000528
6130	-0.000523
6131	-0.000546
6132	-0.000608
6133	-0.000572
6134	-0.00051
6135	-0.000542
6136	-0.000551
6137	-0.000527
6138	-0.000558
6139	-0.000578
6140	-0.000596
6141	-0.000594
6142	-0.00063
6143	-0.000631
6144	-0.000624
6145	-0.000591
6146	-0.000655
6147	-0.000669
6148	-0.000599
6149	-0.000547
6150	-0.000566
6151	-0.000664
6152	-0.000613
6153	-0.000551
6154	-0.000549
6155	-0.000596
6156	-0.000625
6157	-0.000615
6158	-0.000524
6159	-0.000518
6160	-0.000605
6161	-0.00067
6162	-0.000596
6163	-0.000531
6164	-0.00057
6165	-0.000636
6166	-0.00068
6167	-0.000657
6168	-0.000648
6169	-0.000597
6170	-0.000507
6171	-0.000439
6172	-0.000389
6173	-0.000476
6174	-0.000464
6175	-0.000443
6176	-0.000435
6177	-0.000469
6178	-0.000474
6179	-0.000468
6180	-0.000385
6181	-0.00031
6182	-0.00033
6183	-0.000395
6184	-0.000456
6185	-0.00047
6186	-0.000447
6187	-0.000501
6188	-0.000529
6189	-0.000528
6190	-0.000476
6191	-0.000454
6192	-0.00042
6193	-0.000437
6194	-0.000535
6195	-0.000568
6196	-0.000525
6197	-0.000471
6198	-0.00047
6199	-0.000486
6200	-0.000562
6201	-0.000533
6202	-0.00048
6203	-0.000478
6204	-0.000512
6205	-0.000518
6206	-0.000482
6207	-0.000433
6208	-0.000373
6209	-0.000412
6210	-0.000489
6211	-0.000495
6212	-0.000449
6213	-0.000378
6214	-0.000339
6215	-0.000357
6216	-0.000408
6217	-0.000436
6218	-0.000463
6219	-0.000476
6220	-0.0004
6221	-0.000366
6222	-0.000356
6223	-0.000334
6224	-0.000372
6225	-0.000439
6226	-0.000438
6227	-0.00041
6228	-0.00044
6229	-0.000418
6230	-0.000396
6231	-0.000326
6232	-0.000387
6233	-0.000391
6234	-0.000384
6235	-0.000422
6236	-0.000462
6237	-0.000473
6238	-0.00043
6239	0
6240	-9e-06
6241	-1.8e-05
6242	-3.3e-05
6243	-1.2e-05
6244	1.8e-05
6245	8.4e-05
6246	6.1e-05
6247	-1.9e-05
6248	-8.5e-05
6249	-8.2e-05
6250	-9.7e-05
6251	-8.7e-05
6252	-0.000112
6253	-9.2e-05
6254	-3.7e-05
6255	-1.7e-05
6256	1.3e-05
6257	4e-06
6258	4.3e-05
6259	4.3e-05
6260	5.1e-05
6261	7.8e-05
6262	7.3e-05
6263	5.7e-05
6264	3.4e-05
6265	8.2e-05
6266	0.000104
6267	7.2e-05
6268	1.8e-05
6269	8e-06
6270	4.8e-05
6271	-1.6e-05
6272	-8.4e-05
6273	-4.9e-05
6274	7e-06
6275	6.2e-05
6276	8.6e-05
6277	4.1e-05
6278	-1e-06
6279	-6e-06
6280	-3e-05
6281	-2.1e-05
6282	-3.1e-05
6283	-3.3e-05
6284	1.3e-05
6285	-6e-06
6286	-7e-06
6287	-5.2e-05
6288	-8e-06
6289	-2.1e-05
6290	-2.4e-05
6291	4.1e-05
6292	5.4e-05
6293	-1.9e-05
6294	-6.8e-05
6295	-6.3e-05
6296	-1e-05
6297	1e-06
6298	1.3e-05
6299	7.8e-05
6300	7.6e-05
6301	1e-06
6302	-4.3e-05
6303	-4e-06
6304	-5.2e-05
6305	-0.0001
6306	-9.3e-05
6307	-0.000111
6308	-0.00019
6309	-0.000151
6310	-0.000128
6311	-0.000121
6312	-0.000156
6313	-0.000152
6314	-0.000186
6315	-0.000162
6316	-0.000131
6317	-0.000134
6318	-0.000205
6319	-0.000249
6320	-0.000272
6321	-0.000241
6322	-0.000189
6323	-0.000195
6324	-0.000246
6325	-0.000221
6326	-0.000166
6327	-0.000173
6328	-0.000234
6329	-0.000261
6330	-0.000308
6331	-0.000276
6332	-0.000228
6333	-0.000247
6334	-0.000226
6335	-0.000257
6336	-0.000195
6337	-0.000159
6338	-0.000153
6339	-0.000166
6340	-0.000164
6341	-0.000187
6342	-0.000206
6343	-0.000268
6344	-0.000316
6345	-0.000287
6346	-0.000267
6347	-0.000313
6348	-0.000302
6349	-0.000258
6350	-0.000203
6351	-0.000168
6352	-0.000184
6353	-0.000192
6354	-0.000244
6355	-0.000252
6356	-0.000224
6357	-0.000209
6358	-0.000233
6359	-0.000222
6360	-0.000297
6361	-0.000323
6362	-0.000279
6363	-0.000224
6364	-0.000183
6365	-0.000261
6366	-0.000265
6367	-0.000234
6368	-0.000211
6369	-0.00022
6370	-0.0002
6371	-0.000212
6372	-0.000266
6373	-0.000249
6374	-0.000183
6375	-0.000138
6376	-0.000106
6377	-0.000114
6378	-0.000121
6379	-0.000161
6380	-0.000257
6381	-0.000282
6382	-0.000313
6383	-0.000282
6384	-0.000278
6385	-0.000257
6386	-0.000304
6387	-0.000322
6388	-0.000303
6389	-0.000311
6390	-0.00039
6391	-0.000413
6392	-0.000381
6393	-0.000364
6394	-0.000398
6395	-0.000384
6396	-0.000389
6397	-0.000347
6398	-0.000371
6399	-0.000365
6400	-0.000309
6401	-0.00031
6402	-0.000418
6403	-0.000437
6404	-0.000434
6405	-0.000331
6406	-0.000309
6407	-0.000345
6408	-0.000435
6409	-0.000466
6410	-0.000415
6411	-0.000364
6412	-0.000379
6413	-0.000425
6414	-0.000442
6415	-0.000439
6416	-0.000395
6417	-0.000402
6418	-0.000442
6419	-0.000442
6420	-0.000419
6421	-0.000383
6422	-0.000372
6423	-0.00043
6424	-0.000487
6425	-0.000528
6426	-0.000497
6427	-0.000474
6428	-0.000442
6429	-0.000437
6430	-0.000469
6431	-0.000457
6432	-0.000397
6433	-0.000426
6434	-0.000503
6435	-0.000535
6436	-0.000513
6437	-0.000455
6438	-0.000383
6439	-0.000396
6440	-0.000374
6441	-0.000296
6442	-0.000282
6443	-0.000274
6444	-0.000294
6445	-0.000286
6446	-0.000287
6447	-0.000317
6448	-0.000289
6449	-0.000294
6450	-0.000334
6451	-0.000348
6452	-0.00035
6453	-0.00037
6454	-0.00033
6455	-0.00039
6456	-0.000428
6457	-0.000415
6458	-0.00036
6459	-0.000272
6460	-0.000244
6461	-0.00031
6462	-0.000365
6463	-0.000349
6464	-0.00036
6465	-0.000375
6466	-0.000389
6467	-0.00035
6468	-0.000265
6469	-0.00027
6470	-0.000224
6471	-0.00023
6472	-0.000312
6473	-0.0003
6474	-0.000244
6475	-0.000228
6476	-0.000217
6477	-0.000203
6478	-0.000179
6479	-0.000226
6480	-0.000303
6481	-0.000281
6482	-0.000268
6483	-0.000265
6484	-0.000236
6485	-0.000268
6486	-0.000285
6487	-0.000278
6488	-0.000224
6489	-0.000205
6490	-0.000221
6491	-0.000179
6492	-0.000199
6493	-0.000182
6494	-0.000186
6495	-0.000214
6496	-0.000265
6497	-0.000293
6498	-0.000303
6499	-0.000329
6500	-0.000339
6501	-0.000334
6502	-0.000271
6503	-0.000273
6504	-0.000262
6505	-0.00026
6506	-0.000308
6507	-0.00033
6508	-0.000306
6509	-0.000296
6510	-0.000295
6511	-0.000258
6512	-0.000239
6513	-0.000232
6514	-0.000256
6515	-0.000292
6516	-0.000342
6517	-0.000337
6518	-0.000327
6519	-0.000319
6520	-0.00037
6521	-0.00036
6522	-0.000399
6523	-0.000321
6524	-0.00026
6525	-0.000269
6526	-0.000288
6527	-0.000269
6528	-0.00025
6529	-0.000173
6530	-0.000236
6531	-0.00029
6532	-0.000274
6533	-0.000147
6534	-8.5e-05
6535	-0.000142
6536	-0.00023
6537	-0.000245
6538	-0.000161
6539	-0.000112
6540	-0.000166
6541	-0.000256
6542	-0.000274
6543	-0.000248
6544	-0.000202
6545	-0.000225
6546	-0.000202
6547	-0.000165
6548	-0.000175
6549	-0.000236
6550	-0.000253
6551	-0.000221
6552	-0.00022
6553	-0.000242
6554	-0.000239
6555	-0.000198
6556	-0.000141
6557	-0.000158
6558	-0.000141
6559	-0.000214
6560	-0.0003
6561	-0.000306
6562	-0.000274
6563	-0.000269
6564	-0.000215
6565	-0.000202
6566	-0.000157
6567	-0.000152
6568	-0.000195
6569	-0.000254
6570	-0.000185
6571	-0.00019
6572	-0.000268
6573	-0.000324
6574	-0.000303
6575	-0.000234
6576	-0.000224
6577	-0.000276
6578	-0.000226
6579	-0.000161
6580	-0.000109
6581	-0.000169
6582	-0.00018
6583	-0.000224
6584	-0.000249
6585	-0.000222
6586	-0.000249
6587	-0.000283
6588	-0.000275
6589	-0.00028
6590	-0.000316
6591	-0.000322
6592	-0.000278
6593	-0.000287
6594	-0.00032
6595	-0.000311
6596	-0.000278
6597	-0.000325
6598	-0.00031
6599	-0.000306
6600	-0.000257
6601	-0.000278
6602	-0.000234
6603	-0.000299
6604	-0.000279
6605	-0.000299
6606	-0.000332
6607	-0.000345
6608	-0.000425
6609	-0.000457
6610	-0.000444
6611	-0.000406
6612	-0.000431
6613	-0.000416
6614	-0.000416
6615	-0.00043
6616	-0.000412
6617	-0.000405
6618	-0.00042
6619	-0.000388
6620	-0.000393
6621	-0.000437
6622	-0.000439
6623	-0.000448
6624	-0.000393
6625	-0.000411
6626	-0.000439
6627	-0.000463
6628	-0.000493
6629	-0.000462
6630	-0.000354
6631	-0.00029
6632	-0.000308
6633	-0.000303
6634	-0.000234
6635	-0.000325
6636	-0.000402
6637	-0.000452
6638	-0.000396
6639	-0.0004
6640	-0.000382
6641	-0.000437
6642	-0.000464
6643	-0.000406
6644	-0.000385
6645	-0.0004
6646	-0.000391
6647	-0.000401
6648	-0.000422
6649	-0.000404
6650	-0.000365
6651	-0.000311
6652	-0.000406
6653	-0.00049
6654	-0.000479
6655	-0.000433
6656	-0.000466
6657	-0.000436
6658	-0.000397
6659	-0.000412
6660	-0.000387
6661	-0.00037
6662	-0.00035
6663	-0.000355
6664	-0.000418
6665	-0.000448
6666	-0.000444
6667	-0.000341
6668	-0.000249
6669	-0.00029
6670	-0.000379
6671	-0.000403
6672	-0.000396
6673	-0.000359
6674	-0.000298
6675	-0.000271
6676	-0.000284
6677	-0.000271
6678	-0.000219
6679	-0.000266
6680	-0.000321
6681	-0.000279
6682	-0.000256
6683	-0.000233
6684	-0.000201
6685	-0.000256
6686	-0.000304
6687	-0.000336
6688	-0.000287
6689	-0.00027
6690	-0.000286
6691	-0.000301
6692	-0.000278
6693	-0.000252
6694	-0.000252
6695	-0.000309
6696	-0.000319
6697	-0.000338
6698	-0.00032
6699	-0.000332
6700	-0.000333
6701	-0.000355
6702	-0.00037
6703	-0.00037
6704	-0.000399
6705	-0.000427
6706	-0.000446
6707	-0.000434
6708	-0.000341
6709	-0.00027
6710	-0.000255
6711	-0.000334
6712	-0.00041
6713	-0.00037
6714	-0.000312
6715	-0.000354
6716	-0.000351
6717	-0.000288
6718	-0.000261
6719	-0.000269
6720	-0.000241
6721	-0.000241
6722	-0.00029
6723	-0.000303
6724	-0.000249
6725	-0.000252
6726	-0.000267
6727	-0.00031
6728	-0.000357
6729	-0.000344
6730	-0.000301
6731	-0.000255
6732	-0.000254
6733	-0.000268
6734	-0.000269
6735	-0.000236
6736	-0.000267
6737	-0.000261
6738	-0.000268
6739	-0.000361
6740	-0.000369
6741	-0.000259
6742	-0.000215
6743	-0.000279
6744	-0.000259
6745	-0.000196
6746	-0.000217
6747	-0.000268
6748	-0.000296
6749	-0.000283
6750	-0.000273
6751	-0.000287
6752	-0.000331
6753	-0.000335
6754	-0.000336
6755	-0.000352
6756	-0.000367
6757	-0.000321
6758	-0.000287
6759	-0.00033
6760	-0.000373
6761	-0.000256
6762	-0.000289
6763	-0.000312
6764	-0.000365
6765	-0.000358
6766	-0.000326
6767	-0.000304
6768	-0.000232
6769	-0.000223
6770	-0.000222
6771	-0.000199
6772	-0.000208
6773	-0.000222
6774	-0.000278
6775	-0.000347
6776	-0.000352
6777	-0.000337
6778	-0.000331
6779	-0.0003
6780	-0.000292
6781	-0.000317
6782	-0.000344
6783	-0.000261
6784	-0.000216
6785	-0.000252
6786	-0.000276
6787	-0.000233
6788	-0.000182
6789	-0.000208
6790	-0.000249
6791	-0.000192
6792	-0.000194
6793	-0.000215
6794	-0.000167
6795	-0.000125
6796	-0.00017
6797	-0.000199
6798	-0.000185
6799	-0.000202
6800	-0.000182
6801	-0.000201
6802	-0.000226
6803	-0.000252
6804	-0.000238
6805	-0.000281
6806	-0.000242
6807	-0.000195
6808	-0.000216
6809	-0.000274
6810	-0.000253
6811	-0.000237
6812	-0.000289
6813	-0.000297
6814	-0.00031
6815	-0.00029
6816	-0.000294
6817	-0.000325
6818	-0.000371
6819	-0.000351
6820	-0.000295
6821	-0.000291
6822	-0.00032
6823	-0.000291
6824	-0.000265
6825	-0.000245
6826	-0.000224
6827	-0.000162
6828	-0.000154
6829	-0.000159
6830	-0.000177
6831	-0.000162
6832	-0.000149
6833	-0.000194
6834	-0.00021
6835	-0.000205
6836	-0.000255
6837	-0.000264
6838	-0.000298
6839	-0.000268
6840	-0.000268
6841	-0.000234
6842	-0.000172
6843	-0.000167
6844	-0.000218
6845	-0.000267
6846	-0.00028
6847	-0.000248
6848	-0.000186
6849	-0.00011
6850	-0.000144
6851	-0.000258
6852	-0.000298
6853	-0.000248
6854	-0.00023
6855	-0.000287
6856	-0.000332
6857	-0.000352
6858	-0.000317
6859	-0.000252
6860	-0.000283
6861	-0.000285
6862	-0.000251
6863	-0.000192
6864	-0.000224
6865	-0.000243
6866	-0.000237
6867	-0.000241
6868	-0.000238
6869	-0.000261
6870	-0.000273
6871	-0.000311
6872	-0.000327
6873	-0.000336
6874	-0.000336
6875	-0.000308
6876	-0.000304
6877	-0.00031
6878	-0.000335
6879	-0.000351
6880	-0.000362
6881	-0.000333
6882	-0.000303
6883	-0.000341
6884	-0.000359
6885	-0.000378
6886	-0.000404
6887	-0.000381
6888	-0.000401
6889	-0.000343
6890	-0.000331
6891	-0.000335
6892	-0.000331
6893	-0.000314
6894	-0.000269
6895	-0.000281
6896	-0.000336
6897	-0.000393
6898	-0.000379
6899	-0.000378
6900	-0.000374
6901	-0.000371
6902	-0.000433
6903	-0.000473
6904	-0.000422
6905	-0.000305
6906	-0.000296
6907	-0.000356
6908	-0.000397
6909	-0.000366
6910	-0.000357
6911	-0.00038
6912	-0.000346
6913	-0.000406
6914	-0.000389
6915	-0.000311
6916	-0.000368
6917	-0.000447
6918	-0.000464
6919	-0.0004
6920	-0.000358
6921	-0.000359
6922	-0.000334
6923	-0.00037
6924	-0.000395
6925	-0.000407
6926	-0.000394
6927	-0.000378
6928	-0.000409
6929	-0.000419
6930	-0.000472
6931	-0.000515
6932	-0.000471
6933	-0.000451
6934	-0.000395
6935	-0.000384
6936	-0.000431
6937	-0.000346
6938	-0.000306
6939	-0.000295
6940	-0.000339
6941	-0.000357
6942	-0.000364
6943	-0.000343
6944	-0.00037
6945	-0.000488
6946	-0.00052
6947	-0.000559
6948	-0.000547
6949	-0.000503
6950	-0.000475
6951	-0.000436
6952	-0.000499
6953	-0.000473
6954	-0.000436
6955	-0.000452
6956	-0.000486
6957	-0.000472
6958	-0.000393
6959	-0.000398
6960	-0.000371
6961	-0.000403
6962	-0.000385
6963	-0.000425
6964	-0.000408
6965	-0.000416
6966	-0.000363
6967	-0.000367
6968	-0.000439
6969	-0.00039
6970	-0.000337
6971	-0.00035
6972	-0.000408
6973	-0.000426
6974	-0.000447
6975	-0.000439
6976	-0.000454
6977	-0.000477
6978	-0.000443
6979	-0.00035
6980	-0.000358
6981	-0.000365
6982	-0.00036
6983	-0.000345
6984	-0.000362
6985	-0.00038
6986	-0.000403
6987	-0.00044
6988	-0.000508
6989	-0.000469
6990	-0.000442
6991	-0.000381
6992	-0.000463
6993	-0.000492
6994	-0.000446
6995	-0.000382
6996	-0.000408
6997	-0.000472
6998	-0.000513
6999	-0.000524
7000	-0.000507
7001	-0.000432
7002	-0.000459
7003	-0.000482
7004	-0.000446
7005	-0.000359
7006	-0.000302
7007	-0.000265
7008	-0.000364
7009	-0.000503
7010	-0.000542
7011	-0.000511
7012	-0.000424
7013	-0.000345
7014	-0.000335
7015	-0.000369
7016	-0.00043
7017	-0.000454
7018	-0.000393
7019	-0.000397
7020	-0.000404
7021	-0.000397
7022	-0.000369
7023	-0.000362
7024	-0.000352
7025	-0.000356
7026	-0.000398
7027	-0.000418
7028	-0.000402
7029	-0.000429
7030	-0.000386
7031	-0.000333
7032	-0.000321
7033	-0.000359
7034	-0.000341
7035	-0.000362
7036	-0.00037
7037	-0.000406
7038	-0.000389
7039	-0.000377
7040	-0.000377
7041	-0.000404
7042	-0.000385
7043	-0.000373
7044	-0.000366
7045	-0.000393
7046	-0.000411
7047	-0.000399
7048	-0.00037
7049	-0.000384
7050	-0.000447
7051	-0.000422
7052	-0.000366
7053	-0.000353
7054	-0.000373
7055	-0.000343
7056	-0.000401
7057	-0.000463
7058	-0.000469
7059	-0.000439
7060	-0.000424
7061	-0.000451
7062	-0.00045
7063	-0.000429
7064	-0.00041
7065	-0.000422
7066	-0.000425
7067	-0.000479
7068	-0.0005
7069	-0.000403
7070	-0.000366
7071	-0.000463
7072	-0.000503
7073	-0.000474
7074	-0.000487
7075	-0.000475
7076	-0.000423
7077	-0.000338
7078	-0.000313
7079	-0.000354
7080	-0.000299
7081	-0.000266
7082	-0.0003
7083	-0.000412
7084	-0.000433
7085	-0.000474
7086	-0.000475
7087	-0.000442
7088	-0.000435
7089	-0.000415
7090	-0.000399
7091	-0.000414
7092	-0.000387
7093	-0.000363
7094	-0.00034
7095	-0.000388
7096	-0.000475
7097	-0.00048
7098	-0.000422
7099	-0.000421
7100	-0.000449
7101	-0.000483
7102	-0.000448
7103	-0.000413
7104	-0.000409
7105	-0.000466
7106	-0.000496
7107	-0.000509
7108	-0.000504
7109	-0.000465
7110	-0.000436
7111	-0.000492
7112	-0.000515
7113	-0.000469
7114	-0.000413
7115	-0.000451
7116	-0.000513
7117	-0.000536
7118	-0.000484
7119	-0.000465
7120	-0.000463
7121	-0.000494
7122	-0.000442
7123	-0.000423
7124	-0.000426
7125	-0.000424
7126	-0.000393
7127	-0.000389
7128	-0.00037
7129	-0.000338
7130	-0.000297
7131	-0.000387
7132	-0.000462
7133	-0.000458
7134	-0.000425
7135	-0.000397
7136	-0.000395
7137	-0.000439
7138	-0.000409
7139	-0.000349
7140	-0.000331
7141	-0.000351
7142	-0.000375
7143	-0.000401
7144	-0.000471
7145	-0.000441
7146	-0.000407
7147	-0.000363
7148	-0.000334
7149	-0.00037
7150	-0.000409
7151	-0.000362
7152	-0.00036
7153	-0.000424
7154	-0.000424
7155	-0.000447
7156	-0.000468
7157	-0.000446
7158	-0.000436
7159	-0.000445
7160	-0.000485
7161	-0.000468
7162	-0.000446
7163	-0.000396
7164	-0.000432
7165	-0.000425
7166	-0.000393
7167	-0.000361
7168	-0.000421
7169	-0.000517
7170	-0.000524
7171	-0.000424
7172	-0.000389
7173	-0.000409
7174	-0.000409
7175	-0.000427
7176	-0.000464
7177	-0.00045
7178	-0.000467
7179	-0.000483
7180	-0.000456
7181	-0.000449
7182	-0.000464
7183	-0.000444
7184	-0.000488
7185	-0.000485
7186	-0.00046
7187	-0.000459
7188	-0.000457
7189	-0.000447
7190	-0.000428
7191	-0.000462
7192	-0.000469
7193	-0.000435
7194	-0.000415
7195	-0.000412
7196	-0.000413
7197	-0.000456
7198	-0.000439
7199	-0.000425
7200	-0.000479
7201	-0.000537
7202	-0.000499
7203	-0.000488
7204	-0.000459
7205	-0.000394
7206	-0.000376
7207	-0.000431
7208	-0.000406
7209	-0.000401
7210	-0.000417
7211	-0.000459
7212	-0.000482
7213	-0.000434
7214	-0.000443
7215	-0.000452
7216	-0.000465
7217	-0.00051
7218	-0.000538
7219	-0.000531
7220	-0.0005
7221	-0.000483
7222	-0.000487
7223	-0.000484
7224	-0.000394
7225	-0.000374
7226	-0.000403
7227	-0.000433
7228	-0.000465
7229	-0.000479
7230	-0.00054
7231	-0.000578
7232	-0.000571
7233	-0.000585
7234	-0.000508
7235	-0.000429
7236	-0.000314
7237	-0.000281
7238	-0.00036
7239	-0.000496
7240	-0.00052
7241	-0.000559
7242	-0.000512
7243	-0.000483
7244	-0.000492
7245	-0.000473
7246	-0.000439
7247	-0.000392
7248	-0.00041
7249	-0.000414
7250	-0.000385
7251	-0.000349
7252	-0.000401
7253	-0.000378
7254	-0.000388
7255	-0.000446
7256	-0.000433
7257	-0.000371
7258	-0.000364
7259	-0.000359
7260	-0.000412
7261	-0.000379
7262	-0.000321
7263	-0.000322
7264	-0.000364
7265	-0.000367
7266	-0.000404
7267	-0.000375
7268	-0.00033
7269	-0.000312
7270	-0.000325
7271	-0.000385
7272	-0.00039
7273	-0.000391
7274	-0.000414
7275	-0.000455
7276	-0.000442
7277	-0.000376
7278	-0.000361
7279	-0.000321
7280	-0.00031
7281	-0.000331
7282	-0.000344
7283	-0.000366
7284	-0.000382
7285	-0.000379
7286	-0.0004
7287	-0.000347
7288	-0.000313
7289	-0.000299
7290	-0.000359
7291	-0.000364
7292	-0.000358
7293	-0.000348
7294	-0.000361
7295	-0.000346
7296	-0.000361
7297	-0.0004
7298	-0.000395
7299	-0.000354
7300	-0.000332
7301	-0.000325
7302	-0.000334
7303	-0.000329
7304	-0.000249
7305	-0.000224
7306	-0.000229
7307	-0.000246
7308	-0.000292
7309	-0.000275
7310	-0.000276
7311	-0.00026
7312	-0.00029
7313	-0.000315
7314	-0.000368
7315	-0.000308
7316	-0.000241
7317	-0.000204
7318	-0.000296
7319	-0.000316
7320	-0.000276
7321	-0.000228
7322	-0.000224
7323	-0.000263
7324	-0.000347
7325	-0.000391
7326	-0.000341
7327	-0.000311
7328	-0.000366
7329	-0.00043
7330	-0.000366
7331	-0.00033
7332	-0.000348
7333	-0.000316
7334	-0.000183
7335	-0.000195
7336	-0.00018
7337	-0.000211
7338	-0.0002
7339	-0.000227
7340	-0.000282
7341	-0.000294
7342	-0.000254
7343	-0.000216
7344	-0.000221
7345	-0.000249
7346	-0.000252
7347	-0.000227
7348	-0.000148
7349	-0.000122
7350	-0.000138
7351	-0.000142
7352	-0.0002
7353	-0.00022
7354	-0.000232
7355	-0.000175
7356	-0.000172
7357	-0.000215
7358	-0.000232
7359	-0.000188
7360	-0.000122
7361	-8.9e-05
7362	-0.000101
7363	-0.000162
7364	-0.000162
7365	-0.000161
7366	-0.000191
7367	-0.000191
7368	-0.000125
7369	-0.000111
7370	-0.000212
7371	-0.00029
7372	-0.000348
7373	-0.000314
7374	-0.0003
7375	-0.000277
7376	-0.000244
7377	-0.00024
7378	-0.000293
7379	-0.000297
7380	-0.000248
7381	-0.000219
7382	-0.000254
7383	-0.000354
7384	-0.000326
7385	-0.000312
7386	-0.000316
7387	-0.000375
7388	-0.000409
7389	-0.000362
7390	-0.000314
7391	-0.00022
7392	-0.00022
7393	-0.000286
7394	-0.000277
7395	-0.000231
7396	-0.000201
7397	-0.000181
7398	-0.000218
7399	-0.000237
7400	-0.000213
7401	-0.000221
7402	-0.000176
7403	-0.000162
7404	-0.000153
7405	-0.000159
7406	-0.000214
7407	-0.000298
7408	-0.000296
7409	-0.000293
7410	-0.000325
7411	-0.000383
7412	-0.00039
7413	-0.000387
7414	-0.000372
7415	-0.000338
7416	-0.000258
7417	-0.000238
7418	-0.000273
7419	-0.000327
7420	-0.000321
7421	-0.000259
7422	-0.000213
7423	-0.00022
7424	-0.00021
7425	-0.000265
7426	-0.000296
7427	-0.000295
7428	-0.000223
7429	-0.000137
7430	-0.00015
7431	-0.000146
7432	-0.000229
7433	-0.000283
7434	-0.000316
7435	-0.000303
7436	-0.000248
7437	-0.000249
7438	-0.000255
7439	-0.000263
7440	-0.000258
7441	-0.000261
7442	-0.000326
7443	-0.000313
7444	-0.000219
7445	-0.000263
7446	-0.000279
7447	-0.000296
7448	-0.000256
7449	-0.00032
7450	-0.000353
7451	-0.00039
7452	-0.000342
7453	-0.000312
7454	-0.000323
7455	-0.000294
7456	-0.000287
7457	-0.00018
7458	-0.000177
7459	-0.000219
7460	-0.000254
7461	-0.000254
7462	-0.000295
7463	-0.000314
7464	-0.000299
7465	-0.00024
7466	-0.000193
7467	-0.000246
7468	-0.000306
7469	-0.000302
7470	-0.00029
7471	-0.000243
7472	-0.000267
7473	-0.000331
7474	-0.000361
7475	-0.000382
7476	-0.000353
7477	-0.000304
7478	-0.000287
7479	-0.000327
7480	-0.000295
7481	-0.000231
7482	-0.00027
7483	-0.000348
7484	-0.000341
7485	-0.000284
7486	-0.000265
7487	-0.000308
7488	-0.000347
7489	-0.000329
7490	-0.000299
7491	-0.000251
7492	-0.00027
7493	-0.000302
7494	-0.000247
7495	-0.00019
7496	-0.000237
7497	-0.000308
7498	-0.000335
7499	-0.000376
7500	-0.000343
7501	-0.000313
7502	-0.000335
7503	-0.00034
7504	-0.000346
7505	-0.000337
7506	-0.000277
7507	-0.000275
7508	-0.000337
7509	-0.000348
7510	-0.000356
7511	-0.000324
7512	-0.000213
7513	-0.000196
7514	-0.000222
7515	-0.000212
7516	-0.000209
7517	-0.000212
7518	-0.000147
7519	-0.000108
7520	-0.000169
7521	-0.000209
7522	-0.000247
7523	-0.000253
7524	-0.000178
7525	-0.000144
7526	-0.000139
7527	-0.000151
7528	-0.000124
7529	-0.000164
7530	-0.000185
7531	-0.000166
7532	-0.000151
7533	-0.000128
7534	-0.000158
7535	-0.000136
7536	-0.000141
7537	-0.000135
7538	-0.000134
7539	-0.000142
7540	-0.000145
7541	-0.000193
7542	-0.0002
7543	-0.000178
7544	-0.00015
7545	-9.7e-05
7546	-9.3e-05
7547	-0.000113
7548	-0.000143
7549	-9.1e-05
7550	-9.3e-05
7551	-0.000143
7552	-0.000122
7553	-0.00012
7554	-0.000142
7555	-0.000121
7556	-0.000154
7557	-0.00016
7558	-0.000171
7559	-0.000141
7560	-9.2e-05
7561	-9.6e-05
7562	-0.000109
7563	-0.000122
7564	-9.6e-05
7565	-8e-05
7566	-5.1e-05
7567	-6.6e-05
7568	-0.000133
7569	-0.000194
7570	-0.000168
7571	-0.000109
7572	-0.000107
7573	-0.00012
7574	-0.000158
7575	-0.00013
7576	-3e-05
7577	-3.6e-05
7578	-8.8e-05
7579	-0.000124
7580	-7.3e-05
7581	-1e-06
7582	-4.9e-05
7583	-6.9e-05
7584	-9.5e-05
7585	-2.5e-05
7586	-2.4e-05
7587	-1.6e-05
7588	-1.3e-05
7589	2.5e-05
7590	2.8e-05
7591	-1.2e-05
7592	-7.5e-05
7593	-0.000101
7594	-7.8e-05
7595	-3.4e-05
7596	-1.7e-05
7597	-1e-05
7598	4.9e-05
7599	4.8e-05
7600	-4.3e-05
7601	-8.4e-05
7602	-3.8e-05
7603	-2.7e-05
7604	-8.2e-05
7605	-0.000125
7606	-7.4e-05
7607	-7.3e-05
7608	-6.9e-05
7609	-0.000107
7610	-3.4e-05
7611	-0.000117
7612	-0.000195
7613	-0.000213
7614	-0.000166
7615	-0.000143
7616	-0.000154
7617	-0.000144
7618	-0.000112
7619	-2e-05
7620	-2.4e-05
7621	-6.5e-05
7622	-7.9e-05
7623	-6.7e-05
7624	-9.4e-05
7625	-0.000124
7626	-6.7e-05
7627	-2.8e-05
7628	-0.000121
7629	-0.000199
7630	-0.000218
7631	-0.00018
7632	-0.000159
7633	-0.000135
7634	-0.000127
7635	-0.00014
7636	-0.000194
7637	-0.000154
7638	-0.00015
7639	-0.000155
7640	-0.000122
7641	-2.2e-05
7642	-9e-06
7643	-0.00013
7644	-0.000202
7645	-0.000168
7646	-0.000163
7647	-0.00016
7648	-0.000178
7649	-0.000146
7650	-0.000144
7651	-0.000173
7652	-0.000192
7653	-0.000131
7654	-0.000104
7655	-8.7e-05
7656	-0.000101
7657	-7.3e-05
7658	-5e-05
7659	-5.3e-05
7660	-1e-05
7661	-1e-06
7662	-3.5e-05
7663	-8.8e-05
7664	-7.8e-05
7665	-0.000183
7666	-0.00021
7667	-0.000168
7668	-7.9e-05
7669	-8.1e-05
7670	-9.2e-05
7671	-0.00011
7672	-0.000117
7673	-8.1e-05
7674	-7.1e-05
7675	-0.000178
7676	-0.000236
7677	-0.000194
7678	-0.000145
7679	-0.000104
7680	-0.000108
7681	-0.000155
7682	-0.000185
7683	-0.00011
7684	-0.000119
7685	-8e-05
7686	-0.000101
7687	-0.000141
7688	-0.000181
7689	-0.000142
7690	-0.000139
7691	-0.000106
7692	-8.9e-05
7693	-9e-05
7694	-0.000115
7695	-0.000135
7696	-9.9e-05
7697	-7.8e-05
7698	-0.000106
7699	-6.2e-05
7700	-8.3e-05
7701	-5.6e-05
7702	-1e-05
7703	2.5e-05
7704	1.3e-05
7705	3.3e-05
7706	-6.2e-05
7707	-0.000124
7708	-0.000103
7709	-7.3e-05
7710	-2.6e-05
7711	-4.4e-05
7712	-6.2e-05
7713	-5.1e-05
7714	-6.4e-05
7715	-7.9e-05
7716	-4.5e-05
7717	-8.5e-05
7718	-0.000138
7719	-0.000107
7720	-9.6e-05
7721	-8.8e-05
7722	-0.000108
7723	-0.00014
7724	-0.00013
7725	-6.2e-05
7726	-3.7e-05
7727	-4.9e-05
7728	-5.7e-05
7729	-9.1e-05
7730	-4.1e-05
7731	-5.3e-05
7732	-6.9e-05
7733	-5.5e-05
7734	-2.6e-05
7735	-2.5e-05
7736	-2.4e-05
7737	-7e-05
7738	-7.9e-05
7739	-8.4e-05
7740	-3.9e-05
7741	-5.5e-05
7742	-9.2e-05
7743	-8.8e-05
7744	-7.6e-05
7745	-3.3e-05
7746	-8e-06
7747	3.4e-05
7748	4.5e-05
7749	1.3e-05
7750	-4.9e-05
7751	-3e-05
7752	-3.1e-05
7753	-3.3e-05
7754	-2.4e-05
7755	-7e-05
7756	-0.000133
7757	-8.8e-05
7758	-5.7e-05
7759	-3.7e-05
7760	-5.8e-05
7761	-0.000122
7762	-0.000145
7763	-9.3e-05
7764	-1.7e-05
7765	-5.7e-05
7766	-0.000145
7767	-0.000128
7768	-6.7e-05
7769	-5e-05
7770	-6.8e-05
7771	-8.2e-05
7772	-4.9e-05
7773	-3e-06
7774	5e-05
7775	4.1e-05
7776	3.2e-05
7777	-3e-05
7778	-7.3e-05
7779	-4.5e-05
7780	-8.7e-05
7781	-0.000118
7782	-0.000116
7783	-0.00012
7784	-9.2e-05
7785	-6.9e-05
7786	-4.5e-05
7787	-8.6e-05
7788	-0.000116
7789	-0.000124
7790	-5.9e-05
7791	2.5e-05
7792	3e-05
7793	-3.8e-05
7794	-7.8e-05
7795	-0.000115
7796	-0.000154
7797	-0.000213
7798	-0.000199
7799	-0.000149
7800	-0.000137
7801	-9.2e-05
7802	-0.000138
7803	-0.000199
7804	-0.000178
7805	-0.000109
7806	-7.8e-05
7807	-5.7e-05
7808	-4.6e-05
7809	-3.7e-05
7810	-5.6e-05
7811	-0.000107
7812	-5.5e-05
7813	-2.4e-05
7814	-8.1e-05
7815	-9.6e-05
7816	-2.5e-05
7817	3.3e-05
7818	-6e-06
7819	-5.5e-05
7820	-5.8e-05
7821	5e-06
7822	1e-06
7823	-1.6e-05
7824	-1.9e-05
7825	-3e-06
7826	-9e-06
7827	-1e-06
7828	-2e-06
7829	-4.9e-05
7830	-6.7e-05
7831	-4e-06
7832	4.1e-05
7833	5.6e-05
7834	2.3e-05
7835	4.1e-05
7836	-1e-06
7837	9e-06
7838	8.5e-05
7839	0.000137
7840	9.9e-05
7841	8.5e-05
7842	6.3e-05
7843	5.8e-05
7844	3.9e-05
7845	0.000111
7846	0.000127
7847	0.000149
7848	0.000148
7849	0.000169
7850	0.000133
7851	6.9e-05
7852	4e-05
7853	4.8e-05
7854	0.000122
7855	0.000184
7856	0.00017
7857	0.000162
7858	0.000157
7859	0.00016
7860	0.000166
7861	0.000135
7862	0.00012
7863	0.000183
7864	0.000165
7865	0.000139
7866	0.000139
7867	0.000182
7868	0.00022
7869	0.000226
7870	0.000241
7871	0.000182
7872	0.000171
7873	0.000102
7874	7.8e-05
7875	0.000103
7876	0.000153
7877	0.000142
7878	0.000124
7879	0.000105
7880	7.5e-05
7881	3.3e-05
7882	-4.1e-05
7883	-6.1e-05
7884	-4.2e-05
7885	-4.2e-05
7886	-5.7e-05
7887	-1.6e-05
7888	-7.1e-05
7889	-0.000133
7890	-0.000125
7891	-0.000114
7892	-7.9e-05
7893	-8.2e-05
7894	-8.3e-05
7895	-0.000101
7896	-5e-05
7897	-5.7e-05
7898	-4.5e-05
7899	-4.5e-05
7900	-5e-06
7901	-2e-06
7902	-6.7e-05
7903	-0.000107
7904	-0.00012
7905	-0.000155
7906	-9e-05
7907	-2.2e-05
7908	-6.2e-05
7909	-0.000149
7910	-0.000226
7911	-0.000235
7912	-0.00017
7913	-6.2e-05
7914	-2e-06
7915	-4.7e-05
7916	-0.000118
7917	-0.000218
7918	-0.000258
7919	-0.000229
7920	-0.000247
7921	-0.000275
7922	-0.000191
7923	-0.000141
7924	-0.000162
7925	-0.000256
7926	-0.000256
7927	-0.000109
7928	0.000146
7929	0.000314
7930	0.000376
7931	0.000353
7932	0.000125
7933	-0.000137
7934	-0.00019
7935	-0.000182
7936	-0.000245
7937	-0.000343
7938	-0.00031
7939	-0.000285
7940	-0.000306
7941	-0.000338
7942	-0.000334
7943	-0.000312
7944	-0.000349
7945	-0.000382
7946	-0.00035
7947	-0.000297
7948	-0.000269
7949	-0.000258
7950	-0.000278
7951	-0.000329
7952	-0.000329
7953	-0.000364
7954	-0.000287
7955	-0.000193
7956	-0.000192
7957	-0.000277
7958	-0.000247
7959	-0.000215
7960	-0.000243
7961	-0.000311
7962	-0.000337
7963	-0.000362
7964	-0.00036
7965	-0.000311
7966	-0.000247
7967	-0.000263
7968	-0.000333
7969	-0.00037
7970	-0.000399
7971	-0.000361
7972	-0.000328
7973	-0.000316
7974	-0.000409
7975	-0.00042
7976	-0.000355
7977	-0.000328
7978	-0.000359
7979	-0.0004
7980	-0.000427
7981	-0.000392
7982	-0.000325
7983	-0.000303
7984	-0.00032
7985	-0.000297
7986	-0.000302
7987	-0.000321
7988	-0.000343
7989	-0.000337
7990	-0.000348
7991	-0.000385
7992	-0.000376
7993	-0.000337
7994	-0.000327
7995	-0.000301
7996	-0.000291
7997	-0.000297
7998	-0.000282
[truncated: 3,401 more rows]

## Sheet: WT-ERRAAA 0.95 M
Time	UV
6000	0.026442
6001	0.026521
6002	0.026753
6003	0.026746
6004	0.026603
6005	0.026607
6006	0.026466
6007	0.026339
6008	0.02634
6009	0.026279
6010	0.026228
6011	0.026422
6012	0.026461
6013	0.026576
6014	0.026663
6015	0.02674
6016	0.026592
6017	0.026588
6018	0.026617
6019	0.026668
6020	0.026618
6021	0.026468
6022	0.026231
6023	0.026082
6024	0.026157
6025	0.0261
6026	0.02614
6027	0.026393
6028	0.026444
6029	0.026646
6030	0.02673
6031	0.026663
6032	0.02648
6033	0.026439
6034	0.026434
6035	0.026404
6036	0.026328
6037	0.026467
6038	0.026607
6039	0.026417
6040	0.02649
6041	0.026567
6042	0.026338
6043	0.026154
6044	0.026126
6045	0.026304
6046	0.026357
6047	0.026366
6048	0.026278
6049	0.026259
6050	0.026303
6051	0.026263
6052	0.025977
6053	0.025851
6054	0.026015
6055	0.026282
6056	0.026324
6057	0.026291
6058	0.026359
6059	0.026337
6060	0.026408
6061	0.026524
6062	0.026637
6063	0.026515
6064	0.026409
6065	0.026233
6066	0.026194
6067	0.02627
6068	0.026367
6069	0.026211
6070	0.026221
6071	0.026447
6072	0.026604
6073	0.026567
6074	0.026449
6075	0.026453
6076	0.026589
6077	0.026464
6078	0.026461
6079	0.02654
6080	0.026479
6081	0.026424
6082	0.026414
6083	0.026501
6084	0.026468
6085	0.026409
6086	0.026433
6087	0.026466
6088	0.026689
6089	0.026696
6090	0.026792
6091	0.026753
6092	0.026633
6093	0.0266
6094	0.026615
6095	0.026654
6096	0.026566
6097	0.026625
6098	0.026775
6099	0.026736
6100	0.026624
6101	0.02638
6102	0.026281
6103	0.026281
6104	0.026365
6105	0.026314
6106	0.026218
6107	0.026302
6108	0.026302
6109	0.026299
6110	0.026219
6111	0.026159
6112	0.026092
6113	0.026013
6114	0.025974
6115	0.026083
6116	0.026226
6117	0.026246
6118	0.02645
6119	0.026487
6120	0.026352
6121	0.026265
6122	0.026405
6123	0.026488
6124	0.026449
6125	0.026402
6126	0.026404
6127	0.026362
6128	0.026406
6129	0.026619
6130	0.026656
6131	0.026467
6132	0.026367
6133	0.026367
6134	0.026473
6135	0.026357
6136	0.026286
6137	0.026383
6138	0.026427
6139	0.026459
6140	0.026392
6141	0.026444
6142	0.026339
6143	0.026072
6144	0.026095
6145	0.026429
6146	0.026432
6147	0.026279
6148	0.026463
6149	0.026593
6150	0.02647
6151	0.02622
6152	0.026162
6153	0.026173
6154	0.026242
6155	0.026317
6156	0.026265
6157	0.02615
6158	0.02634
6159	0.026448
6160	0.026452
6161	0.026664
6162	0.026684
6163	0.026467
6164	0.026232
6165	0.026497
6166	0.026445
6167	0.026408
6168	0.026415
6169	0.026613
6170	0.0264
6171	0.02642
6172	0.026527
6173	0.026674
6174	0.026782
6175	0.026859
6176	0.026953
6177	0.026891
6178	0.026786
6179	0.026468
6180	0.026401
6181	0.026402
6182	0.026425
6183	0.02645
6184	0.026695
6185	0.027006
6186	0.027054
6187	0.026943
6188	0.02684
6189	0.026951
6190	0.027089
6191	0.027
6192	0.026774
6193	0.026572
6194	0.026593
6195	0.026548
6196	0.02663
6197	0.026717
6198	0.02678
6199	0.026637
6200	0.0265
6201	0.026405
6202	0.026499
6203	0.026817
6204	0.026931
6205	0.026901
6206	0.026965
6207	0.026995
6208	0.026785
6209	0.026719
6210	0.026732
6211	0.026699
6212	0.026587
6213	0.026495
6214	0.026525
6215	0.026793
6216	0.026836
6217	0.026788
6218	0.026554
6219	0.026416
6220	0.02625
6221	0.026474
6222	0.026647
6223	0.02672
6224	0.02669
6225	0.026552
6226	0.026494
6227	0.026694
6228	0.026759
6229	0.026775
6230	0.026735
6231	0.026672
6232	0.026799
6233	0.026755
6234	0.026674
6235	0.026425
6236	0.026374
6237	0.026427
6238	0
6239	0
6240	-0.000134
6241	-0.000178
6242	-0.000344
6243	-0.000324
6244	-0.000314
6245	-0.000384
6246	-0.000293
6247	-0.000225
6248	-0.000203
6249	-0.000187
6250	-0.00021
6251	-0.000363
6252	-0.000515
6253	-0.000497
6254	-0.000546
6255	-0.000699
6256	-0.000647
6257	-0.000445
6258	-0.00053
6259	-0.000553
6260	-0.000637
6261	-0.000645
6262	-0.000733
6263	-0.000429
6264	-0.000396
6265	-0.000308
6266	-0.000402
6267	-0.000537
6268	-0.000586
6269	-0.000544
6270	-0.000602
6271	-0.000613
6272	-0.000511
6273	-0.000419
6274	-0.000455
6275	-0.000813
6276	-0.000916
6277	-0.00108
6278	-0.001015
6279	-0.00102
6280	-0.00113
6281	-0.001035
6282	-0.001101
6283	-0.001182
6284	-0.000967
6285	-0.000821
6286	-0.000903
6287	-0.001001
6288	-0.000756
6289	-0.000735
6290	-0.000898
6291	-0.000888
6292	-0.000688
6293	-0.000496
6294	-0.000408
6295	-0.00031
6296	-0.000149
6297	-0.000134
6298	-0.000158
6299	8.4e-05
6300	0.000271
6301	0.000413
6302	0.000748
6303	0.001085
6304	0.001171
6305	0.0012
6306	0.001891
6307	0.002336
6308	0.002322
6309	0.002472
6310	0.002881
6311	0.003272
6312	0.003369
6313	0.003517
6314	0.003654
6315	0.003612
6316	0.003621
6317	0.003754
6318	0.003964
6319	0.004013
6320	0.004111
6321	0.00414
6322	0.004113
6323	0.004029
6324	0.003991
6325	0.003842
6326	0.004017
6327	0.004159
6328	0.004149
6329	0.004128
6330	0.004208
6331	0.004239
6332	0.004351
6333	0.004326
6334	0.00424
6335	0.004241
6336	0.004084
6337	0.004008
6338	0.004087
6339	0.004359
6340	0.004289
6341	0.004095
6342	0.004082
6343	0.00422
6344	0.00415
6345	0.003967
6346	0.003894
6347	0.003718
6348	0.003678
6349	0.003767
6350	0.003801
6351	0.003747
6352	0.003745
6353	0.003837
6354	0.003752
6355	0.003662
6356	0.003765
6357	0.003649
6358	0.003542
6359	0.003521
6360	0.003636
6361	0.003674
6362	0.00365
6363	0.003383
6364	0.003499
6365	0.003756
6366	0.003872
6367	0.003732
6368	0.003569
6369	0.003213
6370	0.003126
6371	0.003235
6372	0.00325
6373	0.003128
6374	0.003205
6375	0.003126
6376	0.003106
6377	0.003102
6378	0.003255
6379	0.003235
6380	0.003172
6381	0.003255
6382	0.003432
6383	0.00333
6384	0.003331
6385	0.003273
6386	0.003167
6387	0.003114
6388	0.002995
6389	0.002893
6390	0.002906
6391	0.002964
6392	0.003189
6393	0.003367
6394	0.003242
6395	0.003133
6396	0.003188
6397	0.003049
6398	0.002871
6399	0.00257
6400	0.002495
6401	0.002475
6402	0.002446
6403	0.00247
6404	0.002623
6405	0.002746
6406	0.002736
6407	0.002758
6408	0.002636
6409	0.002635
6410	0.002512
6411	0.002588
6412	0.002659
6413	0.002835
6414	0.00292
6415	0.00273
6416	0.002612
6417	0.002644
6418	0.00264
6419	0.00265
6420	0.002585
6421	0.002524
6422	0.002353
6423	0.002297
6424	0.002348
6425	0.002481
6426	0.002483
6427	0.002479
6428	0.002622
6429	0.002689
6430	0.002522
6431	0.002336
6432	0.002229
6433	0.002243
6434	0.002211
6435	0.002356
6436	0.002329
6437	0.002258
6438	0.002259
6439	0.002412
6440	0.002478
6441	0.002504
6442	0.002457
6443	0.002432
6444	0.002301
6445	0.002247
6446	0.002223
6447	0.002123
6448	0.002064
6449	0.002043
6450	0.002149
6451	0.002317
6452	0.002208
6453	0.002135
6454	0.002104
6455	0.00221
6456	0.002325
6457	0.002456
6458	0.002425
6459	0.002236
6460	0.002102
6461	0.002097
6462	0.002187
6463	0.002363
6464	0.002421
6465	0.002177
6466	0.001941
6467	0.001801
6468	0.001565
6469	0.001618
6470	0.001561
6471	0.001741
6472	0.001805
6473	0.001835
6474	0.001809
6475	0.001874
6476	0.001975
6477	0.002013
6478	0.001942
6479	0.001754
6480	0.001764
6481	0.001638
6482	0.001821
6483	0.00187
6484	0.001655
6485	0.0017
6486	0.001886
6487	0.001988
6488	0.001996
6489	0.001905
6490	0.001744
6491	0.001762
6492	0.001919
6493	0.001868
6494	0.001707
6495	0.001626
6496	0.00174
6497	0.001805
6498	0.00201
6499	0.001958
6500	0.001711
6501	0.001522
6502	0.001659
6503	0.001672
6504	0.001572
6505	0.001375
6506	0.001273
6507	0.001231
6508	0.001386
6509	0.001578
6510	0.001454
6511	0.00122
6512	0.001183
6513	0.001217
6514	0.0013
6515	0.001344
6516	0.001524
6517	0.001612
6518	0.001575
6519	0.001452
6520	0.001598
6521	0.001722
6522	0.001633
6523	0.001764
6524	0.001783
6525	0.001662
6526	0.001661
6527	0.001683
6528	0.00172
6529	0.001611
6530	0.001821
6531	0.001768
6532	0.001338
6533	0.001281
6534	0.001275
6535	0.001198
6536	0.001185
6537	0.001284
6538	0.001231
6539	0.001101
6540	0.001151
6541	0.001366
6542	0.001485
6543	0.001313
6544	0.001149
6545	0.001092
6546	0.001015
6547	0.001212
6548	0.001262
6549	0.001094
6550	0.001084
6551	0.00097
6552	0.000889
6553	0.001078
6554	0.001343
6555	0.001525
6556	0.001648
6557	0.001331
6558	0.001042
6559	0.000959
6560	0.001165
6561	0.0014
6562	0.001487
6563	0.001606
6564	0.001631
6565	0.001475
6566	0.001185
6567	0.001144
6568	0.001179
6569	0.001408
6570	0.001358
6571	0.001265
6572	0.001204
6573	0.001141
6574	0.001166
6575	0.001265
6576	0.001419
6577	0.001476
6578	0.001398
6579	0.001212
6580	0.001134
6581	0.0012
6582	0.001405
6583	0.001447
6584	0.00146
6585	0.001214
6586	0.000946
6587	0.000919
6588	0.001196
6589	0.001322
6590	0.001468
6591	0.001401
6592	0.001404
6593	0.001269
6594	0.001367
6595	0.001497
6596	0.001466
6597	0.001123
6598	0.000889
6599	0.000909
6600	0.000924
6601	0.000992
6602	0.001207
6603	0.001245
6604	0.001107
6605	0.000853
6606	0.000739
6607	0.000768
6608	0.000999
6609	0.001009
6610	0.000865
6611	0.000839
6612	0.000848
6613	0.00093
6614	0.001021
6615	0.000923
6616	0.000851
6617	0.00065
6618	0.000653
6619	0.000744
6620	0.000675
6621	0.000693
6622	0.000932
6623	0.001021
6624	0.001114
6625	0.001201
6626	0.001285
6627	0.001152
6628	0.000945
6629	0.001072
6630	0.001128
6631	0.001051
6632	0.001063
6633	0.001173
6634	0.000891
6635	0.000805
6636	0.000789
6637	0.000741
6638	0.000775
6639	0.00098
6640	0.001214
6641	0.001181
6642	0.001075
6643	0.001036
6644	0.001072
6645	0.000878
6646	0.000797
6647	0.000851
6648	0.000802
6649	0.000439
6650	0.000448
6651	0.000537
6652	0.000609
6653	0.000646
6654	0.000723
6655	0.000834
6656	0.000785
6657	0.000754
6658	0.00075
6659	0.000714
6660	0.000666
6661	0.000637
6662	0.000724
6663	0.000758
6664	0.00066
6665	0.000717
6666	0.000531
6667	0.000489
6668	0.000677
6669	0.000799
6670	0.000817
6671	0.000815
6672	0.000753
6673	0.000776
6674	0.000915
6675	0.001016
6676	0.000765
6677	0.000625
6678	0.000639
6679	0.000919
6680	0.001133
6681	0.001367
6682	0.001401
6683	0.001179
6684	0.001039
6685	0.000938
6686	0.001022
6687	0.001118
6688	0.001115
6689	0.001126
6690	0.001087
6691	0.000981
6692	0.000773
6693	0.000771
6694	0.000763
6695	0.00084
6696	0.000799
6697	0.000582
6698	0.000374
6699	0.000578
6700	0.000795
6701	0.000829
6702	0.000937
6703	0.00091
6704	0.000933
6705	0.001037
6706	0.001206
6707	0.001145
6708	0.001117
6709	0.001315
6710	0.001299
6711	0.00102
6712	0.000933
6713	0.001104
6714	0.001426
6715	0.001386
6716	0.001504
6717	0.001577
6718	0.0016
6719	0.001708
6720	0.001714
6721	0.001357
6722	0.00111
6723	0.001025
6724	0.001075
6725	0.000978
6726	0.000869
6727	0.000955
6728	0.00103
6729	0.001012
6730	0.001123
6731	0.001245
6732	0.001258
6733	0.001357
6734	0.001484
6735	0.001473
6736	0.00159
6737	0.00179
6738	0.001766
6739	0.001523
6740	0.001356
6741	0.001362
6742	0.001345
6743	0.001334
6744	0.001369
6745	0.001556
6746	0.001552
6747	0.001417
6748	0.001212
6749	0.000999
6750	0.000995
6751	0.001162
6752	0.001438
6753	0.001572
6754	0.001381
6755	0.001194
6756	0.001253
6757	0.001216
6758	0.001203
6759	0.001302
6760	0.001431
6761	0.001444
6762	0.001548
6763	0.001541
6764	0.001434
6765	0.001563
6766	0.001753
6767	0.001753
6768	0.001832
6769	0.001856
6770	0.001759
6771	0.001659
6772	0.001408
6773	0.001225
6774	0.001322
6775	0.001377
6776	0.001272
6777	0.001171
6778	0.001126
6779	0.001239
6780	0.001332
6781	0.001264
6782	0.001438
6783	0.001589
6784	0.001526
6785	0.001394
6786	0.001329
6787	0.001367
6788	0.001368
6789	0.001461
6790	0.001565
6791	0.001438
6792	0.001299
6793	0.001254
6794	0.001297
6795	0.001421
6796	0.001486
6797	0.00139
6798	0.001294
6799	0.001223
6800	0.00115
6801	0.001112
6802	0.001125
6803	0.001196
6804	0.001309
6805	0.001408
6806	0.001389
6807	0.001319
6808	0.001194
6809	0.001106
6810	0.001045
6811	0.001048
6812	0.00119
6813	0.001321
6814	0.001455
6815	0.001535
6816	0.001687
6817	0.001776
6818	0.001791
6819	0.001624
6820	0.001501
6821	0.001566
6822	0.001554
6823	0.0012
6824	0.001207
6825	0.001399
6826	0.001479
6827	0.001582
6828	0.001683
6829	0.001672
6830	0.00152
6831	0.001333
6832	0.001409
6833	0.001657
6834	0.001656
6835	0.001546
6836	0.001545
6837	0.001704
6838	0.001648
6839	0.001637
6840	0.00174
6841	0.001836
6842	0.001738
6843	0.001545
6844	0.001703
6845	0.001861
6846	0.001882
6847	0.001641
6848	0.001413
6849	0.001376
6850	0.001552
6851	0.001552
6852	0.001588
6853	0.001761
6854	0.001653
6855	0.001524
6856	0.001423
6857	0.001501
6858	0.001597
6859	0.00167
6860	0.001731
6861	0.001704
6862	0.001378
6863	0.00119
6864	0.001219
6865	0.001296
6866	0.001304
6867	0.001301
6868	0.001294
6869	0.001329
6870	0.001553
6871	0.001649
6872	0.001459
6873	0.001315
6874	0.001119
6875	0.001132
6876	0.001027
6877	0.001157
6878	0.001224
6879	0.001037
6880	0.000956
6881	0.00115
6882	0.001236
6883	0.001298
6884	0.001361
6885	0.00121
6886	0.001271
6887	0.00138
6888	0.001344
6889	0.001015
6890	0.001055
6891	0.001032
6892	0.001185
6893	0.001277
6894	0.001246
6895	0.0013
6896	0.001299
6897	0.001157
6898	0.000978
6899	0.000815
6900	0.000823
6901	0.00095
6902	0.00097
6903	0.000987
6904	0.001037
6905	0.001016
6906	0.000885
6907	0.000913
6908	0.001171
6909	0.001187
6910	0.000994
6911	0.000891
6912	0.001039
6913	0.001293
6914	0.001213
6915	0.001053
6916	0.000876
6917	0.000894
6918	0.00083
6919	0.000818
6920	0.000732
6921	0.000579
6922	0.000691
6923	0.00096
6924	0.000925
6925	0.000839
6926	0.000677
6927	0.000581
6928	0.000618
6929	0.000634
6930	0.000794
6931	0.000825
6932	0.001007
6933	0.000938
6934	0.000855
6935	0.000855
6936	0.000917
6937	0.000961
6938	0.001017
6939	0.001027
6940	0.001014
6941	0.001089
6942	0.001043
6943	0.000948
6944	0.001004
6945	0.001155
6946	0.001156
6947	0.001009
6948	0.001012
6949	0.001039
6950	0.001022
6951	0.001152
6952	0.001354
6953	0.001322
6954	0.001195
6955	0.000945
6956	0.000898
6957	0.000926
6958	0.001074
6959	0.000992
6960	0.000765
6961	0.000866
6962	0.00107
6963	0.000838
6964	0.000597
6965	0.000906
6966	0.001167
6967	0.001008
6968	0.000779
6969	0.000637
6970	0.000802
6971	0.000923
6972	0.000917
6973	0.000789
6974	0.000621
6975	0.000574
6976	0.00058
6977	0.000657
6978	0.000732
6979	0.000761
6980	0.000772
6981	0.000917
6982	0.001244
6983	0.001197
6984	0.000974
6985	0.000782
6986	0.00076
6987	0.000888
6988	0.000969
6989	0.000863
6990	0.000634
6991	0.000668
6992	0.000806
6993	0.000934
6994	0.000832
6995	0.000656
6996	0.000741
6997	0.000821
6998	0.000834
6999	0.00098
7000	0.000979
7001	0.001007
7002	0.001016
7003	0.000896
7004	0.000782
7005	0.00074
7006	0.000793
7007	0.000639
7008	0.00059
7009	0.000715
7010	0.000714
7011	0.000598
7012	0.000521
7013	0.000633
7014	0.000734
7015	0.000781
7016	0.000676
7017	0.000602
7018	0.000644
7019	0.000756
7020	0.000769
7021	0.000736
7022	0.000518
7023	0.00063
7024	0.00067
7025	0.000553
7026	0.000387
7027	0.000311
7028	0.000247
7029	0.000353
7030	0.000654
7031	0.000909
7032	0.001007
7033	0.000865
7034	0.000807
7035	0.000656
7036	0.000669
7037	0.000545
7038	0.000447
7039	0.000385
7040	0.000462
7041	0.000498
7042	0.000714
7043	0.000705
7044	0.00051
7045	0.000452
7046	0.000553
7047	0.000663
7048	0.000608
7049	0.000532
7050	0.000554
7051	0.000283
7052	0.000301
7053	0.000437
7054	0.00043
7055	0.000402
7056	0.000239
7057	0.000132
7058	0.000164
7059	0.000223
7060	0.000315
7061	0.000423
7062	0.000695
7063	0.000947
7064	0.000955
7065	0.000747
7066	0.000645
7067	0.000652
7068	0.000695
7069	0.000657
7070	0.000627
7071	0.000557
7072	0.000641
7073	0.000616
7074	0.000601
7075	0.000552
7076	0.000635
7077	0.000557
7078	0.000531
7079	0.00043
7080	0.000532
7081	0.000766
7082	0.000761
7083	0.000667
7084	0.000738
7085	0.00082
7086	0.000906
7087	0.000712
7088	0.000625
7089	0.000879
7090	0.00109
7091	0.001089
7092	0.001023
7093	0.000882
7094	0.00095
7095	0.000962
7096	0.000944
7097	0.000792
7098	0.000667
7099	0.000684
7100	0.000479
7101	0.000422
7102	0.000496
7103	0.000513
7104	0.000324
7105	0.000317
7106	0.000446
7107	0.000506
7108	0.000639
7109	0.000597
7110	0.000632
7111	0.000721
7112	0.000973
7113	0.00107
7114	0.000971
7115	0.0008
7116	0.000541
7117	0.000411
7118	0.000394
7119	0.000302
7120	0.00023
7121	0.000314
7122	0.000353
7123	0.000332
7124	0.000139
7125	-0.000141
7126	-8e-05
7127	-4.5e-05
7128	-1.9e-05
7129	-0.000149
7130	-7.2e-05
7131	0.000115
7132	0.00025
7133	0.000174
7134	4.2e-05
7135	-8.3e-05
7136	0.000211
7137	0.000497
7138	0.00053
7139	0.000418
7140	0.000454
7141	0.000378
7142	0.00044
7143	0.000375
7144	0.000283
7145	0.000262
7146	0.000183
7147	0.000157
7148	0.000253
7149	0.000271
7150	0.000481
7151	0.000611
7152	0.000401
7153	0.000187
7154	0.00011
7155	0.00026
7156	0.000274
7157	0.000213
7158	0.000194
7159	0.000135
7160	7.9e-05
7161	0.000123
7162	0.000238
7163	0.000485
7164	0.000543
7165	0.000476
7166	0.000452
7167	0.000349
7168	0.000367
7169	0.000299
7170	0.000287
7171	0.000344
7172	0.000358
7173	0.000175
7174	-5.8e-05
7175	-2.8e-05
7176	-6.4e-05
7177	-8.1e-05
7178	-5.9e-05
7179	-8.6e-05
7180	2.3e-05
7181	7e-05
7182	0.000183
7183	0.000606
7184	0.00082
7185	0.000998
7186	0.000862
7187	0.000604
7188	0.000567
7189	0.000646
7190	0.00084
7191	0.000812
7192	0.000433
7193	0.000125
7194	-6.6e-05
7195	-0.000118
7196	-5.7e-05
7197	0.000137
7198	0.00018
7199	0.000165
7200	-3.2e-05
7201	-1.1e-05
7202	0.000202
7203	0.000631
7204	0.000616
7205	0.000344
7206	0.000295
7207	0.000491
7208	0.00052
7209	0.000405
7210	0.000371
7211	0.000401
7212	0.000507
7213	0.000541
7214	0.000483
7215	0.000349
7216	0.000332
7217	0.000543
7218	0.000556
7219	0.000364
7220	0.000342
7221	0.00038
7222	0.000466
7223	0.000357
7224	0.000179
7225	0.000346
7226	0.000579
7227	0.000724
7228	0.000637
7229	0.000492
7230	0.000364
7231	0.000269
7232	0.00041
7233	0.000382
7234	0.000259
7235	0.000147
7236	0.00025
7237	8.9e-05
7238	0.000127
7239	0.000135
7240	0.000187
7241	0.00023
7242	0.000168
7243	0.000126
7244	0.000354
7245	0.000381
7246	0.000338
7247	0.000379
7248	0.000272
7249	0.00014
7250	0.000188
7251	0.000184
7252	0.000281
7253	0.000314
7254	0.000527
7255	0.0005
7256	0.000266
7257	0.000228
7258	0.00039
7259	0.000531
7260	0.000479
7261	0.000315
7262	9.9e-05
7263	8.1e-05
7264	0.000143
7265	0.000391
7266	0.000588
7267	0.00056
7268	0.000374
7269	2.7e-05
7270	-0.000153
7271	-0.000382
7272	-0.000375
7273	-0.00043
7274	-0.000189
7275	-1.5e-05
7276	0.000145
7277	7.7e-05
7278	-9.6e-05
7279	-8e-06
7280	0.00021
7281	0.000282
7282	0.00037
7283	0.000371
7284	0.000226
7285	0.000153
7286	0.000373
7287	0.000545
7288	0.00049
7289	0.000247
7290	5.2e-05
7291	0
7292	-8e-06
7293	0.000177
7294	0.000185
7295	0.00021
7296	0.000313
7297	0.000302
7298	0.000302
7299	0.00016
7300	0.000179
7301	0.000389
7302	0.000412
7303	0.000329
7304	0.000134
7305	0.000107
7306	-4.2e-05
7307	-9.4e-05
7308	-0.00025
7309	-0.000202
7310	0.000152
7311	0.000535
7312	0.000538
7313	0.000562
7314	0.00036
7315	0.000176
7316	3e-06
7317	4.3e-05
7318	0.00017
7319	0.000153
7320	0.000163
7321	1.8e-05
7322	0.000105
7323	0.000361
7324	0.000308
7325	0.00017
7326	0.000122
7327	0.000206
7328	0.000215
7329	0.00011
7330	6.8e-05
7331	1.3e-05
7332	7.1e-05
7333	2.3e-05
7334	0.000177
7335	0.00018
7336	0.000279
7337	0.000331
7338	0.000415
7339	0.00043
7340	0.000509
7341	0.000597
7342	0.000586
7343	0.000498
7344	0.000579
7345	0.000577
7346	0.000613
7347	0.000534
7348	0.000478
7349	0.000262
7350	0.000347
7351	0.000448
7352	0.000344
7353	0.000224
7354	-8e-06
7355	0.000134
7356	0.000401
7357	0.000637
7358	0.000634
7359	0.000376
7360	0.000167
7361	7.2e-05
7362	3.7e-05
7363	0.000109
7364	-3.8e-05
7365	-0.000285
7366	-0.000177
7367	6e-06
7368	0.000272
7369	0.000165
7370	1.6e-05
7371	-2.4e-05
7372	0.000561
7373	0.000852
7374	0.000568
7375	0.000513
7376	0.000766
7377	0.000972
7378	0.000974
7379	0.000882
7380	0.000889
7381	0.000977
7382	0.001115
7383	0.001193
7384	0.000914
7385	0.000709
7386	0.000731
7387	0.000867
7388	0.000784
7389	0.000671
7390	0.000596
7391	0.000675
7392	0.000938
7393	0.001045
7394	0.001171
7395	0.00108
7396	0.001098
7397	0.001177
7398	0.000992
7399	0.000727
7400	0.00073
7401	0.000799
7402	0.000793
7403	0.000956
7404	0.001174
7405	0.001075
7406	0.000927
7407	0.000916
7408	0.000969
7409	0.001088
7410	0.000848
7411	0.000753
7412	0.000732
7413	0.000859
7414	0.000966
7415	0.000973
7416	0.000641
7417	0.00055
7418	0.00075
7419	0.000919
7420	0.001067
7421	0.001039
7422	0.000981
7423	0.000882
7424	0.000843
7425	0.000929
7426	0.000942
7427	0.000989
7428	0.00103
7429	0.001013
7430	0.000928
7431	0.000823
7432	0.000849
7433	0.00114
7434	0.00131
7435	0.001391
7436	0.001295
7437	0.001267
7438	0.001254
7439	0.00108
7440	0.001196
7441	0.001293
7442	0.001172
7443	0.00127
7444	0.001273
7445	0.001151
7446	0.001096
7447	0.001011
7448	0.001006
7449	0.001017
7450	0.001044
7451	0.001124
7452	0.001028
7453	0.000946
7454	0.000929
7455	0.000821
7456	0.00097
7457	0.001187
7458	0.001141
7459	0.000927
7460	0.000721
7461	0.000589
7462	0.00048
7463	0.000621
7464	0.000555
7465	0.000522
7466	0.000605
7467	0.000693
7468	0.000668
7469	0.000569
7470	0.000461
7471	0.000624
7472	0.000641
7473	0.000649
7474	0.000414
7475	0.000386
7476	0.000455
7477	0.000522
7478	0.000589
7479	0.000581
7480	0.000238
7481	-2e-06
7482	-8.8e-05
7483	-1e-06
7484	1.1e-05
7485	-3.1e-05
7486	5.1e-05
7487	9e-05
7488	9.8e-05
7489	0.000171
7490	-3.5e-05
7491	0.000137
7492	0.000132
7493	0.000142
7494	0.000325
7495	0.000236
7496	0.000197
7497	8.8e-05
7498	0.000183
7499	0.000393
7500	0.000455
7501	0.000339
7502	0.000233
7503	0.000134
7504	0.000141
7505	6.3e-05
7506	0.000145
7507	0.000209
7508	0.000394
7509	0.000599
7510	0.000788
7511	0.000698
7512	0.000562
7513	0.000295
7514	0.000165
7515	0.000209
7516	0.000263
7517	0.00016
7518	8.1e-05
7519	0.000119
7520	0.000137
7521	9.5e-05
7522	-0.00018
7523	-0.000131
7524	-7e-06
7525	0.000131
7526	0.000408
7527	0.000277
7528	2.8e-05
7529	-0.000111
7530	-0.000159
7531	7.6e-05
7532	0.000206
7533	0.000205
7534	0.000275
7535	0.000228
7536	0.00051
7537	0.000595
7538	0.000489
7539	0.000238
7540	0.000102
7541	5.3e-05
7542	9.6e-05
7543	9.6e-05
7544	0.000467
7545	0.000831
7546	0.000934
7547	0.000896
7548	0.000752
7549	0.000651
7550	0.000439
7551	0.00044
7552	0.000554
7553	0.00109
7554	0.001261
7555	0.001312
7556	0.001172
7557	0.000608
7558	0.000616
7559	0.000693
7560	0.000521
7561	0.000422
7562	0.000473
7563	0.00062
7564	0.000668
7565	0.000658
7566	0.000638
7567	0.000648
7568	0.000575
7569	0.000489
7570	0.000516
7571	0.000852
7572	0.001114
7573	0.001101
7574	0.001085
7575	0.000889
7576	0.000548
7577	0.000508
7578	0.00071
7579	0.001054
7580	0.001151
7581	0.001189
7582	0.000967
7583	0.000944
7584	0.001142
7585	0.001213
7586	0.00117
7587	0.001169
7588	0.000977
7589	0.000969
7590	0.001097
7591	0.001219
7592	0.001163
7593	0.001034
7594	0.000993
7595	0.001091
7596	0.001102
7597	0.001181
7598	0.001126
7599	0.001108
7600	0.000934
7601	0.000632
7602	0.00057
7603	0.000831
7604	0.000972
7605	0.000886
7606	0.000769
7607	0.000591
7608	0.000497
7609	0.000628
7610	0.000934
7611	0.000848
7612	0.000694
7613	0.00062
7614	0.000574
7615	0.000627
7616	0.000458
7617	0.000447
7618	0.000394
7619	0.000675
7620	0.000817
7621	0.001056
7622	0.000962
7623	0.000758
7624	0.000546
7625	0.000567
7626	0.000867
7627	0.001216
7628	0.001166
7629	0.000984
7630	0.001072
7631	0.001048
7632	0.000871
7633	0.000826
7634	0.000986
7635	0.000989
7636	0.001109
7637	0.001321
7638	0.001238
7639	0.000791
7640	0.000695
7641	0.000941
7642	0.001141
7643	0.001131
7644	0.001215
7645	0.001168
7646	0.001152
7647	0.00121
7648	0.001383
7649	0.001579
7650	0.001538
7651	0.001452
7652	0.001421
7653	0.001561
7654	0.001613
7655	0.001683
7656	0.001629
7657	0.001385
7658	0.00121
7659	0.001363
7660	0.001502
7661	0.001496
7662	0.001428
7663	0.001193
7664	0.001179
7665	0.001249
7666	0.000906
7667	0.000654
7668	0.00086
7669	0.001247
7670	0.001321
7671	0.001364
7672	0.001273
7673	0.001267
7674	0.001031
7675	0.000959
7676	0.001162
7677	0.001346
7678	0.001412
7679	0.001327
7680	0.001397
7681	0.001311
7682	0.001223
7683	0.001116
7684	0.000944
7685	0.000983
7686	0.001102
7687	0.00126
7688	0.001071
7689	0.000794
7690	0.000997
7691	0.001095
7692	0.000951
7693	0.000869
7694	0.000938
7695	0.000747
7696	0.000548
7697	0.000656
7698	0.000665
7699	0.000716
7700	0.000785
7701	0.000884
7702	0.001022
7703	0.000965
7704	0.000658
7705	0.000604
7706	0.000508
7707	0.000395
7708	0.000506
7709	0.000771
7710	0.000737
7711	0.000514
7712	0.000488
7713	0.000442
7714	0.000385
7715	0.000169
7716	5.5e-05
7717	1.5e-05
7718	0.000209
7719	0.000406
7720	0.000401
7721	0.000216
7722	5.4e-05
7723	5.2e-05
7724	0.000259
7725	0.000236
7726	0.000167
7727	5.4e-05
7728	0.000136
7729	0.00019
7730	0.000156
7731	0.000119
7732	3e-06
7733	-4.6e-05
7734	2.8e-05
7735	0.000119
7736	-7e-06
7737	-6.7e-05
7738	-3.6e-05
7739	-7e-06
7740	6e-05
7741	0.000124
7742	0.000342
7743	0.000262
7744	2.8e-05
7745	-5.7e-05
7746	0.000159
7747	8.1e-05
7748	4e-05
7749	0.000137
7750	0.000106
7751	2.9e-05
7752	9.3e-05
7753	0.000155
7754	0.000267
7755	0.000146
7756	4.5e-05
7757	-0.000112
7758	-7.2e-05
7759	9e-06
7760	2.1e-05
7761	-0.000108
7762	-2e-05
7763	0.000217
7764	0.000379
7765	0.000262
7766	0.000574
7767	0.000538
7768	0.00023
7769	0.000345
7770	0.000591
7771	0.000751
7772	0.000567
7773	0.000702
7774	0.000643
7775	0.000366
7776	0.000295
7777	0.000214
7778	0.000149
7779	5.9e-05
7780	0.000324
7781	0.000558
7782	0.000578
7783	0.000536
7784	0.000248
7785	0.000303
7786	0.000295
7787	0.000538
7788	0.000469
7789	0.000355
7790	0.00014
7791	6.6e-05
7792	9.3e-05
7793	0.000159
7794	0.000265
7795	0.000438
7796	0.000492
7797	0.000362
7798	0.000286
7799	8.5e-05
7800	7.5e-05
7801	9.8e-05
7802	-1.8e-05
7803	-0.000166
7804	-0.000115
7805	-0.00023
7806	-0.000147
7807	1.2e-05
7808	9.3e-05
7809	-1e-06
7810	-0.000115
7811	-1.3e-05
7812	-6.4e-05
7813	-9e-05
7814	-0.000155
7815	-8.5e-05
7816	-3.5e-05
7817	-4.3e-05
7818	0.000211
7819	0.000303
7820	6.4e-05
7821	-0.000297
7822	-0.000438
7823	-1.6e-05
7824	0.000245
7825	9.4e-05
7826	-0.000121
7827	3.6e-05
7828	0.000292
7829	0.000331
7830	0.00031
7831	0.000147
7832	3.5e-05
7833	-8e-05
7834	-2e-06
7835	-0.000258
7836	-0.000445
7837	-0.000328
7838	-0.000165
7839	-6.8e-05
7840	-0.000207
7841	-0.000379
7842	-0.00039
7843	-0.000551
7844	-0.000794
7845	-0.000685
7846	-0.000461
7847	-0.000443
7848	-0.000463
7849	-0.000432
7850	-0.000608
7851	-0.000665
7852	-0.000705
7853	-0.000479
7854	-0.000202
7855	-9.5e-05
7856	-0.000158
7857	-0.000248
7858	-0.000155
7859	-0.000111
7860	-8.5e-05
7861	-1.2e-05
7862	3.5e-05
7863	-0.00015
7864	-0.000398
7865	-0.000349
7866	-0.00023
7867	-0.000163
7868	-0.000289
7869	-0.000311
7870	-0.00028
7871	-0.000107
7872	-0.000174
7873	-0.000435
7874	-0.000646
7875	-0.00058
7876	-0.000555
7877	-0.00045
7878	-0.000394
7879	-0.000447
7880	-0.0005
7881	-0.000571
7882	-0.000482
7883	-0.00031
7884	-0.000391
7885	-0.000435
7886	-0.000342
7887	-0.000482
7888	-0.000583
7889	-0.000565
7890	-0.000559
7891	-0.000368
7892	-0.000412
7893	-0.000259
7894	-0.000247
7895	-0.000449
7896	-0.000607
7897	-0.000634
7898	-0.000533
7899	-0.000401
7900	-0.000451
7901	-0.000483
7902	-0.000513
7903	-0.000257
7904	-0.000252
7905	-0.000211
7906	-2.6e-05
7907	-0.000133
7908	-0.000374
7909	-0.000252
7910	-0.00034
7911	-0.000483
7912	-0.000678
7913	-0.00069
7914	-0.000657
7915	-0.000591
7916	-0.000425
7917	-0.000373
7918	-0.000554
7919	-0.000602
7920	-0.000372
7921	-0.000198
7922	-0.000383
7923	-0.000535
7924	-0.000621
7925	-0.00044
7926	-0.00016
7927	-9.2e-05
7928	-7.5e-05
7929	-0.000183
7930	-0.000195
7931	-9.2e-05
7932	-7.4e-05
7933	-0.000104
7934	8.2e-05
7935	8.8e-05
7936	-3.5e-05
7937	-9.9e-05
7938	8.5e-05
7939	0.000219
7940	0.000194
7941	0.000103
7942	-9.2e-05
7943	-0.00025
7944	-0.000263
7945	-0.000148
7946	-7.5e-05
7947	-4.5e-05
7948	1e-06
7949	2.6e-05
7950	-0.000175
7951	-0.000224
7952	-7.6e-05
7953	8.6e-05
7954	-2.4e-05
7955	-0.000257
7956	-0.000168
7957	4.6e-05
7958	-0.000128
7959	-0.000112
7960	5.6e-05
7961	0.00018
7962	7.6e-05
7963	-0.000141
7964	-0.000362
7965	-0.000387
7966	-0.00037
7967	-0.000412
7968	-0.000301
7969	-0.000244
7970	-0.000244
7971	-1.3e-05
7972	0.000139
7973	0.000222
7974	0.000216
7975	8.5e-05
7976	0.000106
7977	7.4e-05
7978	-0.000227
7979	-0.000414
7980	-0.000371
7981	-0.000235
7982	-0.000315
7983	-0.000253
7984	-7.5e-05
7985	0.000212
7986	0.000229
7987	9.1e-05
7988	0.000128
7989	0.000311
7990	0.000224
7991	0.000143
7992	0.000107
7993	3.4e-05
7994	-1.9e-05
7995	3.1e-05
7996	0.000178
7997	0.00035
7998	0.00023
[truncated: 3,401 more rows]

## Sheet: WT-ERRAAA 0.45 M
Time	UV
6000	-0.000242
6001	-0.000307
6002	-0.000378
6003	-0.00032
6004	-0.000447
6005	-0.000484
6006	-0.000434
6007	-0.000388
6008	-0.000284
6009	-0.000273
6010	-0.000381
6011	-0.000404
6012	-0.000419
6013	-0.000444
6014	-0.000293
6015	-0.000251
6016	-0.000301
6017	-0.000402
6018	-0.000317
6019	-0.0002
6020	-0.000196
6021	-0.000332
6022	-0.000289
6023	-0.000202
6024	-0.000286
6025	-0.000394
6026	-0.000477
6027	-0.00042
6028	-0.000477
6029	-0.000406
6030	-0.000438
6031	-0.00055
6032	-0.000675
6033	-0.000679
6034	-0.000561
6035	-0.000459
6036	-0.000356
6037	-0.00035
6038	-0.00025
6039	-0.000223
6040	-0.000302
6041	-0.000279
6042	-0.000179
6043	-0.000342
6044	-0.000298
6045	-0.000218
6046	-0.00024
6047	-0.000347
6048	-0.000257
6049	-0.000172
6050	-0.000194
6051	-0.000189
6052	-0.000266
6053	-0.000236
6054	-0.000131
6055	-2.3e-05
6056	6e-06
6057	5.3e-05
6058	4.2e-05
6059	-1.8e-05
6060	-0.000164
6061	-0.000178
6062	-0.00024
6063	-0.000275
6064	-0.00024
6065	-0.000131
6066	-0.000102
6067	-0.000244
6068	-0.000194
6069	-0.000163
6070	1.7e-05
6071	4.8e-05
6072	0.000103
6073	-3.3e-05
6074	-0.000141
6075	-0.000192
6076	-0.000128
6077	-7.9e-05
6078	-3.4e-05
6079	-0.000115
6080	-0.000176
6081	-0.000274
6082	-0.00028
6083	-0.000287
6084	-0.000256
6085	-0.000313
6086	-0.00029
6087	-0.000208
6088	-0.000211
6089	-0.000242
6090	-0.000458
6091	-0.000492
6092	-0.000346
6093	-0.000202
6094	-0.000174
6095	-0.000278
6096	-0.000269
6097	-0.000161
6098	-0.000146
6099	-0.000243
6100	-0.000412
6101	-0.000389
6102	-0.000168
6103	-0.000162
6104	-0.000292
6105	-0.000415
6106	-0.000231
6107	-0.000133
6108	-0.000173
6109	-0.000286
6110	-0.000278
6111	-0.000319
6112	-0.000397
6113	-0.000259
6114	-0.000176
6115	-0.000272
6116	-0.000341
6117	-0.000355
6118	-0.000406
6119	-0.000351
6120	-0.000338
6121	-0.000356
6122	-0.000419
6123	-0.000308
6124	-0.000212
6125	-0.000217
6126	-0.000228
6127	-0.000338
6128	-0.000308
6129	-0.000274
6130	-0.000278
6131	-0.000262
6132	-0.00023
6133	-0.000158
6134	-0.000196
6135	-0.000193
6136	-0.00025
6137	-0.00022
6138	-0.000203
6139	-0.000187
6140	-0.000163
6141	-0.000115
6142	-0.000136
6143	-6.2e-05
6144	-9.8e-05
6145	-0.000186
6146	-0.000242
6147	-0.000221
6148	-0.000199
6149	-0.000204
6150	-0.000248
6151	-0.000161
6152	-8.7e-05
6153	-0.000151
6154	-7.6e-05
6155	-0.00014
6156	-2.9e-05
6157	8.5e-05
6158	0.000226
6159	0.000324
6160	0.000401
6161	0.000306
6162	0.000161
6163	2.9e-05
6164	2.4e-05
6165	-4.1e-05
6166	-9e-06
6167	7.4e-05
6168	6e-06
6169	7.3e-05
6170	2.8e-05
6171	3.7e-05
6172	3.5e-05
6173	7.9e-05
6174	0.000127
6175	0.000111
6176	0.000182
6177	4.6e-05
6178	-6.9e-05
6179	-5.4e-05
6180	2.4e-05
6181	-0.00013
6182	-0.000236
6183	-9.7e-05
6184	-4.5e-05
6185	-9.2e-05
6186	-4.7e-05
6187	3.9e-05
6188	9.5e-05
6189	3.6e-05
6190	-9.2e-05
6191	-0.000161
6192	-0.000101
6193	-0.000175
6194	-0.000173
6195	1.4e-05
6196	8.3e-05
6197	-4.7e-05
6198	-7.9e-05
6199	-0.000114
6200	-0.000129
6201	-0.000226
6202	-0.000196
6203	-8.7e-05
6204	-0.000157
6205	-0.000249
6206	-0.000275
6207	-0.000271
6208	-0.000263
6209	-0.000268
6210	-0.00025
6211	-0.000232
6212	-0.000253
6213	-0.000168
6214	-0.000178
6215	-0.000155
6216	-0.000154
6217	-0.000125
6218	-0.000165
6219	-0.000219
6220	-0.000239
6221	-0.000137
6222	4.4e-05
6223	5.3e-05
6224	-9.1e-05
6225	-0.000108
6226	-7.2e-05
6227	-8e-06
6228	-5e-05
6229	-0.000155
6230	-0.000186
6231	-8.6e-05
6232	-1.2e-05
6233	-2.1e-05
6234	-0.000131
6235	-0.000188
6236	-0.000138
6237	-0.000118
6238	-0.000178
6239	0
6240	-4.1e-05
6241	-0.00021
6242	-0.000365
6243	-0.000481
6244	-0.000668
6245	-0.000712
6246	-0.000662
6247	-0.000579
6248	-0.000545
6249	-0.000431
6250	-0.000485
6251	-0.000434
6252	-0.000447
6253	-0.000315
6254	-0.000282
6255	-0.000446
6256	-0.000532
6257	-0.000569
6258	-0.000536
6259	-0.000395
6260	-0.000571
6261	-0.000608
6262	-0.00053
6263	-0.000368
6264	-0.000297
6265	-0.000424
6266	-0.000564
6267	-0.000509
6268	-0.000346
6269	-0.000339
6270	-0.000377
6271	-0.000325
6272	-0.000331
6273	-0.000411
6274	-0.00058
6275	-0.000534
6276	-0.000617
6277	-0.000676
6278	-0.000792
6279	-0.000788
6280	-0.000634
6281	-0.000581
6282	-0.000656
6283	-0.000689
6284	-0.000623
6285	-0.000561
6286	-0.000631
6287	-0.000729
6288	-0.00073
6289	-0.000638
6290	-0.000577
6291	-0.000557
6292	-0.000375
6293	-0.00016
6294	-1.3e-05
6295	-3.3e-05
6296	-0.000152
6297	-0.000438
6298	-0.000588
6299	-0.000646
6300	-0.00055
6301	-0.000546
6302	-0.000564
6303	-0.000631
6304	-0.000724
6305	-0.00083
6306	-0.00088
6307	-0.000906
6308	-0.000906
6309	-0.000847
6310	-0.000855
6311	-0.000841
6312	-0.000853
6313	-0.000818
6314	-0.000728
6315	-0.000675
6316	-0.000582
6317	-0.000587
6318	-0.000582
6319	-0.000793
6320	-0.001061
6321	-0.001198
6322	-0.001188
6323	-0.001263
6324	-0.001233
6325	-0.001115
6326	-0.001053
6327	-0.000902
6328	-0.000781
6329	-0.000689
6330	-0.000929
6331	-0.00104
6332	-0.001023
6333	-0.001082
6334	-0.000987
6335	-0.0009
6336	-0.000882
6337	-0.000842
6338	-0.00091
6339	-0.000899
6340	-0.0008
6341	-0.000758
6342	-0.000933
6343	-0.001103
6344	-0.001168
6345	-0.001142
6346	-0.001046
6347	-0.001018
6348	-0.001035
6349	-0.001071
6350	-0.000857
6351	-0.000768
6352	-0.000853
6353	-0.000934
6354	-0.000927
6355	-0.000925
6356	-0.001022
6357	-0.001139
6358	-0.001274
6359	-0.001187
6360	-0.001148
6361	-0.001073
6362	-0.001125
6363	-0.001211
6364	-0.00137
6365	-0.001433
6366	-0.001266
6367	-0.001121
6368	-0.001009
6369	-0.001263
6370	-0.001574
6371	-0.001501
6372	-0.001442
6373	-0.001534
6374	-0.00155
6375	-0.001333
6376	-0.001308
6377	-0.001388
6378	-0.001366
6379	-0.001157
6380	-0.001147
6381	-0.001149
6382	-0.001217
6383	-0.001179
6384	-0.0013
6385	-0.001307
6386	-0.001192
6387	-0.00119
6388	-0.00118
6389	-0.001164
6390	-0.001203
6391	-0.001218
6392	-0.001165
6393	-0.001158
6394	-0.001172
6395	-0.001272
6396	-0.001423
6397	-0.001436
6398	-0.001351
6399	-0.00108
6400	-0.000995
6401	-0.001067
6402	-0.00112
6403	-0.001223
6404	-0.001423
6405	-0.001442
6406	-0.001325
6407	-0.001208
6408	-0.001108
6409	-0.001052
6410	-0.00105
6411	-0.001096
6412	-0.000971
6413	-0.000988
6414	-0.001228
6415	-0.001271
6416	-0.001291
6417	-0.001254
6418	-0.001231
6419	-0.001272
6420	-0.001277
6421	-0.001135
6422	-0.000879
6423	-0.000827
6424	-0.000891
6425	-0.001082
6426	-0.001122
6427	-0.001022
6428	-0.001118
6429	-0.001148
6430	-0.00108
6431	-0.001043
6432	-0.000988
6433	-0.000901
6434	-0.000907
6435	-0.000879
6436	-0.000914
6437	-0.00101
6438	-0.000963
6439	-0.00085
6440	-0.000938
6441	-0.001128
6442	-0.00122
6443	-0.001199
6444	-0.001233
6445	-0.001171
6446	-0.001165
6447	-0.001214
6448	-0.001304
6449	-0.001329
6450	-0.001355
6451	-0.001233
6452	-0.001294
6453	-0.00121
6454	-0.001159
6455	-0.001183
6456	-0.001209
6457	-0.001146
6458	-0.00113
6459	-0.001231
6460	-0.001241
6461	-0.001145
6462	-0.001074
6463	-0.001029
6464	-0.001074
6465	-0.000982
6466	-0.00091
6467	-0.001103
6468	-0.001328
6469	-0.001221
6470	-0.001027
6471	-0.001062
6472	-0.001143
6473	-0.001271
6474	-0.001301
6475	-0.00123
6476	-0.001186
6477	-0.001127
6478	-0.001009
6479	-0.001009
6480	-0.001118
6481	-0.001238
6482	-0.00118
6483	-0.001291
6484	-0.001468
6485	-0.00141
6486	-0.001162
6487	-0.000898
6488	-0.000862
6489	-0.000956
6490	-0.00095
6491	-0.000975
6492	-0.00098
6493	-0.000851
6494	-0.000637
6495	-0.000946
6496	-0.001243
6497	-0.001388
6498	-0.001383
6499	-0.001113
6500	-0.001031
6501	-0.001104
6502	-0.001271
6503	-0.001334
6504	-0.001334
6505	-0.001086
6506	-0.000849
6507	-0.000888
6508	-0.000998
6509	-0.000939
6510	-0.000864
6511	-0.001035
6512	-0.001012
6513	-0.001003
6514	-0.001049
6515	-0.001227
6516	-0.001189
6517	-0.001079
6518	-0.000976
6519	-0.000966
6520	-0.000979
6521	-0.001098
6522	-0.001184
6523	-0.001081
6524	-0.000858
6525	-0.000853
6526	-0.000969
6527	-0.001114
6528	-0.001127
6529	-0.001121
6530	-0.00104
6531	-0.000931
6532	-0.000997
6533	-0.000996
6534	-0.000818
6535	-0.000796
6536	-0.000792
6537	-0.000704
6538	-0.000522
6539	-0.000415
6540	-0.000525
6541	-0.000735
6542	-0.000853
6543	-0.000947
6544	-0.000944
6545	-0.000886
6546	-0.0007
6547	-0.000804
6548	-0.001015
6549	-0.001087
6550	-0.001116
6551	-0.000934
6552	-0.000857
6553	-0.000925
6554	-0.001056
6555	-0.001162
6556	-0.001103
6557	-0.000998
6558	-0.000906
6559	-0.000843
6560	-0.000927
6561	-0.001015
6562	-0.001022
6563	-0.000952
6564	-0.000879
6565	-0.0008
6566	-0.000789
6567	-0.000682
6568	-0.000524
6569	-0.000523
6570	-0.000691
6571	-0.000799
6572	-0.000812
6573	-0.000746
6574	-0.000492
6575	-0.00053
6576	-0.000705
6577	-0.000747
6578	-0.000641
6579	-0.000447
6580	-0.000411
6581	-0.0006
6582	-0.000726
6583	-0.000585
6584	-0.000516
6585	-0.000626
6586	-0.000718
6587	-0.000748
6588	-0.000679
6589	-0.000789
6590	-0.000966
6591	-0.001116
6592	-0.000908
6593	-0.000822
6594	-0.001095
6595	-0.00142
6596	-0.001768
6597	-0.001771
6598	-0.001737
6599	-0.001574
6600	-0.001308
6601	-0.001179
6602	-0.001214
6603	-0.001279
6604	-0.001271
6605	-0.001249
6606	-0.001291
6607	-0.001292
6608	-0.001205
6609	-0.001275
6610	-0.001337
6611	-0.001246
6612	-0.001193
6613	-0.001227
6614	-0.001237
6615	-0.001079
6616	-0.001057
6617	-0.001181
6618	-0.001168
6619	-0.000982
6620	-0.000946
6621	-0.001085
6622	-0.001245
6623	-0.001274
6624	-0.0013
6625	-0.00129
6626	-0.001157
6627	-0.001074
6628	-0.001091
6629	-0.001017
6630	-0.000916
6631	-0.000871
6632	-0.000826
6633	-0.000693
6634	-0.000601
6635	-0.000664
6636	-0.00069
6637	-0.000793
6638	-0.001043
6639	-0.001221
6640	-0.001294
6641	-0.001154
6642	-0.00102
6643	-0.00106
6644	-0.001099
6645	-0.001021
6646	-0.000976
6647	-0.001237
6648	-0.00128
6649	-0.001332
6650	-0.001271
6651	-0.001224
6652	-0.001085
6653	-0.001058
6654	-0.001035
6655	-0.001022
6656	-0.001044
6657	-0.000953
6658	-0.000832
6659	-0.000817
6660	-0.000699
6661	-0.000654
6662	-0.000737
6663	-0.000926
6664	-0.001067
6665	-0.000847
6666	-0.000842
6667	-0.000905
6668	-0.000875
6669	-0.000625
6670	-0.000647
6671	-0.000828
6672	-0.000779
6673	-0.000646
6674	-0.000766
6675	-0.000723
6676	-0.000694
6677	-0.000632
6678	-0.000535
6679	-0.000545
6680	-0.000549
6681	-0.000662
6682	-0.000847
6683	-0.00117
6684	-0.001181
6685	-0.001124
6686	-0.001182
6687	-0.00123
6688	-0.001343
6689	-0.001402
6690	-0.001353
6691	-0.001294
6692	-0.001277
6693	-0.001006
6694	-0.000808
6695	-0.000787
6696	-0.00082
6697	-0.000619
6698	-0.000473
6699	-0.000375
6700	-0.000401
6701	-0.000658
6702	-0.001139
6703	-0.00143
6704	-0.001494
6705	-0.001717
6706	-0.001904
6707	-0.001902
6708	-0.001892
6709	-0.001618
6710	-0.001566
6711	-0.001435
6712	-0.00143
6713	-0.001362
6714	-0.001326
6715	-0.001342
6716	-0.001453
6717	-0.001585
6718	-0.001661
6719	-0.001772
6720	-0.001814
6721	-0.001826
6722	-0.001764
6723	-0.00164
6724	-0.001734
6725	-0.001809
6726	-0.001754
6727	-0.001661
6728	-0.001624
6729	-0.001687
6730	-0.001676
6731	-0.001834
6732	-0.001852
6733	-0.001871
6734	-0.001806
6735	-0.001855
6736	-0.001734
6737	-0.001595
6738	-0.001668
6739	-0.001711
6740	-0.001673
6741	-0.001649
6742	-0.001825
6743	-0.0018
6744	-0.001662
6745	-0.001489
6746	-0.001595
6747	-0.001815
6748	-0.001816
6749	-0.001742
6750	-0.001755
6751	-0.00175
6752	-0.001652
6753	-0.001726
6754	-0.001897
6755	-0.002062
6756	-0.002041
6757	-0.001731
6758	-0.001765
6759	-0.001852
6760	-0.001732
6761	-0.001578
6762	-0.00176
6763	-0.00193
6764	-0.001841
6765	-0.001804
6766	-0.001824
6767	-0.002211
6768	-0.002615
6769	-0.002588
6770	-0.002274
6771	-0.002051
6772	-0.001857
6773	-0.001795
6774	-0.001606
6775	-0.001648
6776	-0.001694
6777	-0.00174
6778	-0.0017
6779	-0.001591
6780	-0.001488
6781	-0.001662
6782	-0.0018
6783	-0.001821
6784	-0.001764
6785	-0.001675
6786	-0.001628
6787	-0.001687
6788	-0.001804
6789	-0.001785
6790	-0.001677
6791	-0.001553
6792	-0.001539
6793	-0.001562
6794	-0.001689
6795	-0.001785
6796	-0.001678
6797	-0.001478
6798	-0.00141
6799	-0.001587
6800	-0.001769
6801	-0.001804
6802	-0.001748
6803	-0.001704
6804	-0.001658
6805	-0.001607
6806	-0.001533
6807	-0.001543
6808	-0.001803
6809	-0.001873
6810	-0.001718
6811	-0.001466
6812	-0.001537
6813	-0.001685
6814	-0.00166
6815	-0.001696
6816	-0.001679
6817	-0.001673
6818	-0.001761
6819	-0.001777
6820	-0.001637
6821	-0.001714
6822	-0.001764
6823	-0.001634
6824	-0.001477
6825	-0.001529
6826	-0.001608
6827	-0.001578
6828	-0.001488
6829	-0.001511
6830	-0.00159
6831	-0.001492
6832	-0.001499
6833	-0.001621
6834	-0.001563
6835	-0.001408
6836	-0.00148
6837	-0.001486
6838	-0.001598
6839	-0.001533
6840	-0.001616
6841	-0.001758
6842	-0.001858
6843	-0.001816
6844	-0.001714
6845	-0.00173
6846	-0.001731
6847	-0.001632
6848	-0.00135
6849	-0.001324
6850	-0.001466
6851	-0.001719
6852	-0.001864
6853	-0.001737
6854	-0.001664
6855	-0.001534
6856	-0.001408
6857	-0.001318
6858	-0.001336
6859	-0.001461
6860	-0.00147
6861	-0.001472
6862	-0.00149
6863	-0.001598
6864	-0.001491
6865	-0.001462
6866	-0.001516
6867	-0.001631
6868	-0.001655
6869	-0.00155
6870	-0.001517
6871	-0.001404
6872	-0.001448
6873	-0.001544
6874	-0.001564
6875	-0.001513
6876	-0.001481
6877	-0.001538
6878	-0.0016
6879	-0.001454
6880	-0.001246
6881	-0.001077
6882	-0.001277
6883	-0.001576
6884	-0.001669
6885	-0.001637
6886	-0.001488
6887	-0.00141
6888	-0.001291
6889	-0.001273
6890	-0.0014
6891	-0.001503
6892	-0.001436
6893	-0.001415
6894	-0.001574
6895	-0.001598
6896	-0.001574
6897	-0.001554
6898	-0.00149
6899	-0.001422
6900	-0.001399
6901	-0.001289
6902	-0.001252
6903	-0.001243
6904	-0.001436
6905	-0.001583
6906	-0.001552
6907	-0.001363
6908	-0.00133
6909	-0.001341
6910	-0.00137
6911	-0.001328
6912	-0.001366
6913	-0.001494
6914	-0.001483
6915	-0.001459
6916	-0.001516
6917	-0.001693
6918	-0.001593
6919	-0.001414
6920	-0.001516
6921	-0.001679
6922	-0.001785
6923	-0.001805
6924	-0.001684
6925	-0.001598
6926	-0.001698
6927	-0.001642
6928	-0.001582
6929	-0.001525
6930	-0.001579
6931	-0.00157
6932	-0.001817
6933	-0.001819
6934	-0.001597
6935	-0.001408
6936	-0.001428
6937	-0.001599
6938	-0.001732
6939	-0.001847
6940	-0.001632
6941	-0.001512
6942	-0.001738
6943	-0.001979
6944	-0.002012
6945	-0.001828
6946	-0.001682
6947	-0.001506
6948	-0.001665
6949	-0.001935
6950	-0.00189
6951	-0.001817
6952	-0.001851
6953	-0.002003
6954	-0.002011
6955	-0.001992
6956	-0.001998
6957	-0.001715
6958	-0.001549
6959	-0.001537
6960	-0.00165
6961	-0.001801
6962	-0.00168
6963	-0.001483
6964	-0.001508
6965	-0.001436
6966	-0.001601
6967	-0.00176
6968	-0.002012
6969	-0.002183
6970	-0.002052
6971	-0.001842
6972	-0.001592
6973	-0.001702
6974	-0.001611
6975	-0.001436
6976	-0.001378
6977	-0.001378
6978	-0.001402
6979	-0.001727
6980	-0.002019
6981	-0.002073
6982	-0.002072
6983	-0.002059
6984	-0.001915
6985	-0.001832
6986	-0.001866
6987	-0.002157
6988	-0.002244
6989	-0.002101
6990	-0.002004
6991	-0.002093
6992	-0.002122
6993	-0.002046
6994	-0.002036
6995	-0.00174
6996	-0.001443
6997	-0.001287
6998	-0.001169
6999	-0.00101
7000	-0.001093
7001	-0.001524
7002	-0.001781
7003	-0.001764
7004	-0.001894
7005	-0.001993
7006	-0.002064
7007	-0.001759
7008	-0.001375
7009	-0.00124
7010	-0.001375
7011	-0.001248
7012	-0.001149
7013	-0.001241
7014	-0.001058
7015	-0.001037
7016	-0.001171
7017	-0.001107
7018	-0.001012
7019	-0.001089
7020	-0.001357
7021	-0.00154
7022	-0.001833
7023	-0.001801
7024	-0.001484
7025	-0.001297
7026	-0.001194
7027	-0.001254
7028	-0.001209
7029	-0.001393
7030	-0.001363
7031	-0.001283
7032	-0.001399
7033	-0.001637
7034	-0.001681
7035	-0.001471
7036	-0.001417
7037	-0.001542
7038	-0.001587
7039	-0.001629
7040	-0.001542
7041	-0.001565
7042	-0.001638
7043	-0.001998
7044	-0.001884
7045	-0.001708
7046	-0.001721
7047	-0.001934
7048	-0.001834
7049	-0.0016
7050	-0.00154
7051	-0.001374
7052	-0.001247
7053	-0.001281
7054	-0.001305
7055	-0.001228
7056	-0.00138
7057	-0.001249
7058	-0.001059
7059	-0.001177
7060	-0.001405
7061	-0.001339
7062	-0.001332
7063	-0.00149
7064	-0.001848
7065	-0.002088
7066	-0.002097
7067	-0.00213
7068	-0.002148
7069	-0.002049
7070	-0.002
7071	-0.001965
7072	-0.001933
7073	-0.001797
7074	-0.001844
7075	-0.001917
7076	-0.001918
7077	-0.001752
7078	-0.00146
7079	-0.001372
7080	-0.001696
7081	-0.001791
7082	-0.00173
7083	-0.001446
7084	-0.001457
7085	-0.001448
7086	-0.001431
7087	-0.00146
7088	-0.001374
7089	-0.001401
7090	-0.00138
7091	-0.001409
7092	-0.001469
7093	-0.001664
7094	-0.001689
7095	-0.001575
7096	-0.001634
7097	-0.001966
7098	-0.002023
7099	-0.001962
7100	-0.001882
7101	-0.001844
7102	-0.001897
7103	-0.001809
7104	-0.00167
7105	-0.001608
7106	-0.001762
7107	-0.00188
7108	-0.001711
7109	-0.001708
7110	-0.001704
7111	-0.001699
7112	-0.001676
7113	-0.001708
7114	-0.001832
7115	-0.00182
7116	-0.001613
7117	-0.001571
7118	-0.00157
7119	-0.00145
7120	-0.001667
7121	-0.001738
7122	-0.001783
7123	-0.001635
7124	-0.001516
7125	-0.001512
7126	-0.001539
7127	-0.00144
7128	-0.001337
7129	-0.00146
7130	-0.00155
7131	-0.001495
7132	-0.001298
7133	-0.001348
7134	-0.001528
7135	-0.001515
7136	-0.001517
7137	-0.001483
7138	-0.001355
7139	-0.001519
7140	-0.001675
7141	-0.001646
7142	-0.001509
7143	-0.001459
7144	-0.001446
7145	-0.001433
7146	-0.001456
7147	-0.001492
7148	-0.001481
7149	-0.001342
7150	-0.001436
7151	-0.001518
7152	-0.001408
7153	-0.001334
7154	-0.001294
7155	-0.00135
7156	-0.001316
7157	-0.001366
7158	-0.001465
7159	-0.001425
7160	-0.001483
7161	-0.001489
7162	-0.001341
7163	-0.001272
7164	-0.001436
7165	-0.001451
7166	-0.001419
7167	-0.00141
7168	-0.001396
7169	-0.001267
7170	-0.001187
7171	-0.001184
7172	-0.001075
7173	-0.001156
7174	-0.001453
7175	-0.001689
7176	-0.001782
7177	-0.001877
7178	-0.001981
7179	-0.00206
7180	-0.001982
7181	-0.002042
7182	-0.002119
7183	-0.002131
7184	-0.002054
7185	-0.001945
7186	-0.001597
7187	-0.001429
7188	-0.001425
7189	-0.001389
7190	-0.001336
7191	-0.001345
7192	-0.001243
7193	-0.001363
7194	-0.001379
7195	-0.001344
7196	-0.001264
7197	-0.001374
7198	-0.001502
7199	-0.00169
7200	-0.001971
7201	-0.002019
7202	-0.001926
7203	-0.001985
7204	-0.002014
7205	-0.002072
7206	-0.002091
7207	-0.001815
7208	-0.001698
7209	-0.00168
7210	-0.001791
7211	-0.001829
7212	-0.001719
7213	-0.001566
7214	-0.001611
7215	-0.001699
7216	-0.001579
7217	-0.001476
7218	-0.001508
7219	-0.001639
7220	-0.001671
7221	-0.001863
7222	-0.001803
7223	-0.001793
7224	-0.001806
7225	-0.001799
7226	-0.001711
7227	-0.001909
7228	-0.00203
7229	-0.002057
7230	-0.002072
7231	-0.002036
7232	-0.001745
7233	-0.001465
7234	-0.001402
7235	-0.001564
7236	-0.001395
7237	-0.001234
7238	-0.000993
7239	-0.001027
7240	-0.001214
7241	-0.001384
7242	-0.00168
7243	-0.002047
7244	-0.002126
7245	-0.001818
7246	-0.001725
7247	-0.001934
7248	-0.001971
7249	-0.00181
7250	-0.001798
7251	-0.001777
7252	-0.001772
7253	-0.001739
7254	-0.001658
7255	-0.001773
7256	-0.002011
7257	-0.001963
7258	-0.00195
7259	-0.002013
7260	-0.002227
7261	-0.002348
7262	-0.002198
7263	-0.001975
7264	-0.001755
7265	-0.001539
7266	-0.001418
7267	-0.001548
7268	-0.001763
7269	-0.001922
7270	-0.001834
7271	-0.001789
7272	-0.00178
7273	-0.001863
7274	-0.001952
7275	-0.001845
7276	-0.001673
7277	-0.001629
7278	-0.001772
7279	-0.001682
7280	-0.001541
7281	-0.001628
7282	-0.00165
7283	-0.001348
7284	-0.001006
7285	-0.000804
7286	-0.001
7287	-0.001101
7288	-0.001285
7289	-0.001493
7290	-0.001537
7291	-0.001448
7292	-0.001438
7293	-0.001398
7294	-0.001479
7295	-0.00156
7296	-0.001571
7297	-0.001599
7298	-0.001614
7299	-0.00155
7300	-0.001561
7301	-0.001698
7302	-0.001549
7303	-0.001314
7304	-0.001355
7305	-0.001566
7306	-0.001805
7307	-0.001821
7308	-0.001817
7309	-0.001621
7310	-0.001359
7311	-0.001311
7312	-0.001423
7313	-0.001586
7314	-0.001573
7315	-0.001512
7316	-0.001485
7317	-0.001452
7318	-0.001591
7319	-0.00169
7320	-0.001607
7321	-0.001653
7322	-0.001735
7323	-0.001597
7324	-0.001258
7325	-0.00109
7326	-0.001176
7327	-0.00144
7328	-0.00168
7329	-0.001698
7330	-0.001784
7331	-0.00181
7332	-0.001758
7333	-0.001553
7334	-0.001532
7335	-0.001585
7336	-0.001553
7337	-0.001351
7338	-0.001264
7339	-0.001358
7340	-0.001424
7341	-0.001288
7342	-0.001308
7343	-0.001351
7344	-0.001345
7345	-0.001281
7346	-0.001313
7347	-0.001345
7348	-0.001344
7349	-0.001469
7350	-0.001572
7351	-0.001594
7352	-0.001546
7353	-0.001508
7354	-0.001536
7355	-0.001525
7356	-0.00153
7357	-0.001486
7358	-0.001283
7359	-0.001023
7360	-0.000853
7361	-0.00089
7362	-0.001097
7363	-0.001331
7364	-0.001373
7365	-0.001436
7366	-0.001491
7367	-0.001405
7368	-0.001351
7369	-0.001326
7370	-0.001109
7371	-0.000912
7372	-0.00087
7373	-0.000945
7374	-0.000808
7375	-0.000628
7376	-0.00053
7377	-0.000489
7378	-0.000522
7379	-0.000497
7380	-0.000531
7381	-0.00051
7382	-0.000526
7383	-0.000344
7384	-0.000346
7385	-0.000403
7386	-0.000311
7387	-0.000235
7388	-0.000264
7389	-0.000238
7390	-0.000277
7391	-0.000298
7392	-0.000226
7393	-0.000199
7394	-0.00031
7395	-0.000347
7396	-0.000359
7397	-0.000349
7398	-0.000385
7399	-0.000325
7400	-0.000296
7401	-0.000325
7402	-0.000333
7403	-0.000162
7404	-8.1e-05
7405	-0.000234
7406	-0.000395
7407	-0.000246
7408	-0.00019
7409	-0.000207
7410	-0.000243
7411	-0.000156
7412	-0.000121
7413	-0.0002
7414	-0.000258
7415	-0.00025
7416	-0.000199
7417	-0.0002
7418	-0.000268
7419	-0.000329
7420	-0.000406
7421	-0.00035
7422	-0.000318
7423	-0.000191
7424	-7.4e-05
7425	-0.000141
7426	-0.000177
7427	-0.000219
7428	-0.000344
7429	-0.00044
7430	-0.000233
7431	-0.000226
7432	-0.000269
7433	-0.000294
7434	-6.8e-05
7435	7.3e-05
7436	1.6e-05
7437	-4.5e-05
7438	-5.6e-05
7439	-0.0001
7440	-0.00018
7441	-0.000268
7442	-0.000357
7443	-0.000285
7444	-6.2e-05
7445	-0.000167
7446	-0.000339
7447	-0.000393
7448	-0.000325
7449	-0.000295
7450	-0.000271
7451	-0.000146
7452	-5e-05
7453	-0.000101
7454	-0.000155
7455	-0.000271
7456	-0.000296
7457	-0.000158
7458	-7.5e-05
7459	-9.8e-05
7460	-9.4e-05
7461	-0.000111
7462	-0.000174
7463	-0.000252
7464	-0.000234
7465	-0.000289
7466	-0.000424
7467	-0.000458
7468	-0.000421
7469	-0.000395
7470	-0.000413
7471	-0.00047
7472	-0.000374
7473	-0.000293
7474	-0.000255
7475	-0.000254
7476	-0.00025
7477	-0.000211
7478	-0.000229
7479	-0.000157
7480	-0.000263
7481	-0.000335
7482	-0.000262
7483	-0.000199
7484	-0.000226
7485	-0.000268
7486	-0.000307
7487	-0.000311
7488	-0.000281
7489	-0.000261
7490	-0.000311
7491	-0.000537
7492	-0.000555
7493	-0.000494
7494	-0.000425
7495	-0.000355
7496	-0.000374
7497	-0.000387
7498	-0.00019
7499	-5.9e-05
7500	-8.7e-05
7501	-0.000274
7502	-0.000222
7503	-0.000371
7504	-0.000454
7505	-0.000434
7506	-0.000447
7507	-0.000584
7508	-0.000699
7509	-0.000657
7510	-0.000661
7511	-0.000641
7512	-0.000577
7513	-0.00052
7514	-0.00041
7515	-0.000343
7516	-0.00042
7517	-0.000481
7518	-0.000574
7519	-0.000659
7520	-0.000644
7521	-0.000704
7522	-0.000569
7523	-0.000488
7524	-0.000475
7525	-0.000519
7526	-0.00034
7527	-0.000368
7528	-0.00067
7529	-0.00063
7530	-0.000575
7531	-0.00072
7532	-0.001029
7533	-0.001298
7534	-0.001586
7535	-0.001697
7536	-0.001599
7537	-0.001486
7538	-0.001632
7539	-0.001569
7540	-0.00159
7541	-0.001476
7542	-0.0014
7543	-0.001433
7544	-0.001486
7545	-0.001363
7546	-0.00127
7547	-0.001223
7548	-0.001375
7549	-0.001426
7550	-0.001425
7551	-0.001417
7552	-0.001485
7553	-0.001655
7554	-0.00159
7555	-0.00163
7556	-0.001589
7557	-0.001517
7558	-0.001405
7559	-0.001573
7560	-0.001715
7561	-0.001691
7562	-0.001527
7563	-0.001352
7564	-0.001242
7565	-0.00143
7566	-0.001536
7567	-0.001681
7568	-0.001619
7569	-0.001468
7570	-0.001474
7571	-0.001427
7572	-0.001319
7573	-0.001439
7574	-0.001478
7575	-0.001482
7576	-0.001752
7577	-0.001844
7578	-0.001562
7579	-0.001474
7580	-0.001642
7581	-0.001685
7582	-0.001638
7583	-0.001708
7584	-0.001733
7585	-0.00172
7586	-0.00165
7587	-0.001662
7588	-0.001787
7589	-0.001725
7590	-0.001654
7591	-0.001508
7592	-0.001283
7593	-0.001308
7594	-0.001511
7595	-0.001571
7596	-0.001428
7597	-0.001486
7598	-0.001609
7599	-0.001514
7600	-0.001501
7601	-0.001494
7602	-0.001472
7603	-0.001599
7604	-0.001585
7605	-0.001574
7606	-0.00164
7607	-0.001659
7608	-0.001638
7609	-0.001681
7610	-0.001643
7611	-0.001454
7612	-0.001382
7613	-0.001473
7614	-0.001593
7615	-0.001495
7616	-0.001456
7617	-0.001499
7618	-0.001566
7619	-0.001588
7620	-0.001478
7621	-0.001352
7622	-0.001487
7623	-0.001607
7624	-0.0015
7625	-0.001429
7626	-0.001413
7627	-0.001413
7628	-0.001449
7629	-0.001529
7630	-0.001505
7631	-0.001297
7632	-0.001237
7633	-0.001251
7634	-0.001243
7635	-0.001398
7636	-0.001632
7637	-0.001642
7638	-0.001576
7639	-0.001614
7640	-0.001812
7641	-0.001774
7642	-0.001617
7643	-0.001566
7644	-0.001559
7645	-0.001617
7646	-0.001614
7647	-0.001646
7648	-0.001604
7649	-0.001582
7650	-0.001449
7651	-0.001427
7652	-0.001409
7653	-0.001369
7654	-0.001375
7655	-0.00136
7656	-0.001374
7657	-0.00143
7658	-0.001522
7659	-0.00143
7660	-0.00143
7661	-0.001523
7662	-0.001495
7663	-0.001349
7664	-0.001295
7665	-0.001256
7666	-0.001265
7667	-0.001374
7668	-0.001431
7669	-0.001427
7670	-0.001355
7671	-0.001414
7672	-0.00135
7673	-0.001332
7674	-0.00141
7675	-0.00139
7676	-0.001421
7677	-0.001572
7678	-0.001728
7679	-0.001725
7680	-0.001629
7681	-0.001601
7682	-0.001645
7683	-0.001675
7684	-0.001575
7685	-0.001504
7686	-0.001529
7687	-0.001536
7688	-0.001456
7689	-0.001404
7690	-0.001446
7691	-0.001488
7692	-0.001526
7693	-0.001594
7694	-0.001524
7695	-0.001404
7696	-0.001379
7697	-0.001433
7698	-0.001414
7699	-0.001287
7700	-0.001333
7701	-0.001452
7702	-0.001423
7703	-0.001386
7704	-0.00147
7705	-0.001465
7706	-0.001523
7707	-0.001606
7708	-0.00159
7709	-0.001573
7710	-0.001644
7711	-0.001665
7712	-0.001614
7713	-0.001545
7714	-0.001486
7715	-0.001402
7716	-0.001513
7717	-0.001445
7718	-0.001359
7719	-0.001396
7720	-0.001455
7721	-0.00133
7722	-0.001195
7723	-0.001132
7724	-0.001065
7725	-0.00108
7726	-0.001285
7727	-0.001534
7728	-0.001689
7729	-0.001658
7730	-0.001645
7731	-0.001645
7732	-0.001606
7733	-0.00146
7734	-0.001369
7735	-0.001508
7736	-0.001678
7737	-0.0017
7738	-0.001785
7739	-0.001739
7740	-0.001651
7741	-0.001539
7742	-0.00154
7743	-0.001462
7744	-0.001395
7745	-0.001404
7746	-0.001496
7747	-0.001576
7748	-0.001435
7749	-0.001381
7750	-0.001445
7751	-0.001566
7752	-0.001628
7753	-0.001697
7754	-0.001597
7755	-0.001313
7756	-0.001429
7757	-0.001756
7758	-0.001904
7759	-0.001814
7760	-0.001763
7761	-0.001617
7762	-0.001619
7763	-0.001575
7764	-0.001552
7765	-0.001436
7766	-0.001337
7767	-0.001331
7768	-0.001442
7769	-0.001439
7770	-0.00135
7771	-0.001264
7772	-0.0013
7773	-0.001354
7774	-0.001391
7775	-0.001337
7776	-0.001363
7777	-0.001481
7778	-0.001516
7779	-0.001523
7780	-0.001505
7781	-0.001358
7782	-0.001339
7783	-0.001427
7784	-0.001605
7785	-0.001606
7786	-0.001551
7787	-0.001478
7788	-0.001447
7789	-0.001476
7790	-0.00147
7791	-0.001515
7792	-0.001468
7793	-0.001439
7794	-0.001448
7795	-0.0015
7796	-0.001529
7797	-0.001452
7798	-0.001391
7799	-0.001432
7800	-0.001584
7801	-0.001711
7802	-0.001674
7803	-0.00164
7804	-0.001584
7805	-0.001621
7806	-0.001797
7807	-0.001801
7808	-0.001747
7809	-0.001726
7810	-0.001708
7811	-0.001665
7812	-0.001618
7813	-0.001606
7814	-0.001449
7815	-0.001349
7816	-0.001506
7817	-0.001641
7818	-0.001572
7819	-0.001365
7820	-0.001316
7821	-0.001255
7822	-0.001378
7823	-0.001493
7824	-0.001537
7825	-0.001534
7826	-0.00156
7827	-0.001573
7828	-0.001707
7829	-0.001709
7830	-0.001667
7831	-0.001731
7832	-0.001909
7833	-0.002056
7834	-0.001828
7835	-0.001629
7836	-0.001593
7837	-0.001703
7838	-0.001844
7839	-0.001921
7840	-0.001956
7841	-0.002001
7842	-0.001979
7843	-0.001889
7844	-0.001829
7845	-0.001605
7846	-0.001601
7847	-0.001672
7848	-0.001634
7849	-0.001631
7850	-0.001714
7851	-0.001754
7852	-0.001578
7853	-0.001526
7854	-0.001566
7855	-0.001592
7856	-0.001502
7857	-0.001528
7858	-0.001421
7859	-0.001425
7860	-0.001348
7861	-0.001306
7862	-0.001321
7863	-0.001491
7864	-0.001742
7865	-0.001937
7866	-0.00197
7867	-0.001952
7868	-0.001955
7869	-0.001913
7870	-0.001979
7871	-0.001995
7872	-0.002094
7873	-0.002116
7874	-0.001992
7875	-0.002014
7876	-0.002015
7877	-0.002013
7878	-0.002011
7879	-0.001922
7880	-0.00205
7881	-0.002083
7882	-0.001983
7883	-0.00196
7884	-0.001976
7885	-0.001999
7886	-0.001938
7887	-0.001818
7888	-0.001893
7889	-0.001806
7890	-0.001519
7891	-0.0014
7892	-0.001541
7893	-0.001679
7894	-0.001546
7895	-0.00155
7896	-0.001512
7897	-0.001527
7898	-0.001571
7899	-0.001679
7900	-0.001655
7901	-0.001767
7902	-0.001833
7903	-0.001886
7904	-0.001857
7905	-0.001787
7906	-0.002017
7907	-0.002173
7908	-0.002183
7909	-0.002118
7910	-0.001971
7911	-0.001906
7912	-0.001893
7913	-0.00182
7914	-0.001793
7915	-0.001847
7916	-0.00184
7917	-0.001966
7918	-0.00199
7919	-0.001911
7920	-0.001788
7921	-0.001814
7922	-0.001917
7923	-0.001851
7924	-0.001733
7925	-0.001635
7926	-0.001677
7927	-0.001827
7928	-0.001941
7929	-0.002012
7930	-0.002037
7931	-0.001935
7932	-0.001821
7933	-0.001872
7934	-0.001774
7935	-0.001725
7936	-0.001699
7937	-0.001668
7938	-0.001696
7939	-0.001751
7940	-0.001845
7941	-0.001793
7942	-0.001841
7943	-0.001777
7944	-0.001681
7945	-0.001471
7946	-0.001344
7947	-0.001335
7948	-0.001386
7949	-0.001378
7950	-0.001337
7951	-0.001434
7952	-0.001476
7953	-0.00147
7954	-0.001632
7955	-0.001832
7956	-0.001954
7957	-0.002
7958	-0.001988
7959	-0.001953
7960	-0.00197
7961	-0.002034
7962	-0.001908
7963	-0.00177
7964	-0.001798
7965	-0.001798
7966	-0.001781
7967	-0.001852
7968	-0.001826
7969	-0.001953
7970	-0.002046
7971	-0.001892
7972	-0.001899
7973	-0.001873
7974	-0.001911
7975	-0.001998
7976	-0.002141
7977	-0.002034
7978	-0.001895
7979	-0.001863
7980	-0.001896
7981	-0.001879
7982	-0.001756
7983	-0.001737
7984	-0.001747
7985	-0.001576
7986	-0.001343
7987	-0.001323
7988	-0.001138
7989	-0.001048
7990	-0.001202
7991	-0.001375
7992	-0.001361
7993	-0.001343
7994	-0.001397
7995	-0.001441
7996	-0.001374
7997	-0.001418
7998	-0.001434
[truncated: 3,401 more rows]

## Sheet: WT-ERRAAA 0.15 M
Time	UV
6000	-0.001434
6001	-0.001525
6002	-0.001604
6003	-0.001791
6004	-0.00173
6005	-0.001683
6006	-0.001666
6007	-0.001657
6008	-0.001516
6009	-0.001339
6010	-0.001338
6011	-0.001352
6012	-0.00125
6013	-0.001125
6014	-0.001071
6015	-0.001023
6016	-0.001096
6017	-0.00132
6018	-0.001403
6019	-0.0013
6020	-0.001217
6021	-0.001096
6022	-0.001013
6023	-0.001103
6024	-0.001245
6025	-0.001177
6026	-0.001027
6027	-0.001204
6028	-0.001271
6029	-0.001125
6030	-0.001134
6031	-0.001183
6032	-0.001245
6033	-0.001334
6034	-0.001412
6035	-0.001419
6036	-0.001339
6037	-0.001533
6038	-0.001525
6039	-0.00145
6040	-0.001403
6041	-0.001369
6042	-0.001402
6043	-0.001426
6044	-0.001527
6045	-0.001555
6046	-0.001619
6047	-0.001616
6048	-0.00163
6049	-0.001569
6050	-0.001543
6051	-0.0014
6052	-0.001271
6053	-0.001494
6054	-0.001641
6055	-0.001529
6056	-0.001392
6057	-0.001411
6058	-0.001507
6059	-0.001589
6060	-0.001797
6061	-0.001872
6062	-0.001699
6063	-0.001573
6064	-0.00168
6065	-0.001665
6066	-0.001426
6067	-0.001368
6068	-0.001651
6069	-0.001633
6070	-0.001541
6071	-0.001544
6072	-0.001624
6073	-0.001506
6074	-0.001428
6075	-0.001409
6076	-0.001461
6077	-0.001565
6078	-0.001804
6079	-0.001774
6080	-0.001882
6081	-0.001961
6082	-0.001989
6083	-0.002066
6084	-0.002079
6085	-0.002126
6086	-0.002239
6087	-0.002404
6088	-0.002427
6089	-0.002368
6090	-0.002292
6091	-0.002265
6092	-0.00225
6093	-0.002345
6094	-0.002369
6095	-0.002451
6096	-0.002628
6097	-0.002536
6098	-0.002418
6099	-0.002477
6100	-0.002658
6101	-0.00277
6102	-0.002654
6103	-0.002712
6104	-0.002635
6105	-0.002575
6106	-0.002358
6107	-0.00217
6108	-0.00198
6109	-0.001914
6110	-0.001881
6111	-0.001892
6112	-0.001872
6113	-0.001835
6114	-0.001753
6115	-0.001684
6116	-0.001598
6117	-0.001557
6118	-0.001715
6119	-0.001997
6120	-0.002036
6121	-0.001926
6122	-0.001876
6123	-0.001844
6124	-0.001706
6125	-0.001423
6126	-0.001321
6127	-0.001408
6128	-0.001493
6129	-0.001487
6130	-0.001595
6131	-0.001696
6132	-0.001581
6133	-0.001559
6134	-0.001607
6135	-0.001507
6136	-0.001123
6137	-0.000945
6138	-0.001121
6139	-0.001169
6140	-0.001205
6141	-0.001224
6142	-0.00118
6143	-0.001142
6144	-0.000996
6145	-0.001016
6146	-0.00098
6147	-0.00093
6148	-0.001022
6149	-0.001172
6150	-0.001384
6151	-0.001361
6152	-0.001227
6153	-0.001073
6154	-0.001102
6155	-0.001126
6156	-0.001166
6157	-0.001191
6158	-0.001108
6159	-0.001056
6160	-0.001077
6161	-0.001216
6162	-0.001226
6163	-0.001124
6164	-0.001149
6165	-0.001227
6166	-0.001453
6167	-0.001422
6168	-0.001337
6169	-0.001096
6170	-0.001083
6171	-0.001181
6172	-0.001393
6173	-0.00134
6174	-0.001383
6175	-0.001315
6176	-0.001417
6177	-0.001593
6178	-0.001712
6179	-0.001407
6180	-0.001143
6181	-0.001264
6182	-0.001388
6183	-0.001355
6184	-0.001446
6185	-0.001571
6186	-0.001505
6187	-0.001525
6188	-0.001563
6189	-0.001537
6190	-0.001529
6191	-0.001589
6192	-0.001546
6193	-0.001437
6194	-0.001206
6195	-0.000954
6196	-0.000982
6197	-0.001289
6198	-0.001516
6199	-0.001552
6200	-0.001645
6201	-0.001565
6202	-0.001577
6203	-0.001659
6204	-0.001856
6205	-0.001863
6206	-0.00172
6207	-0.001598
6208	-0.001638
6209	-0.001871
6210	-0.001984
6211	-0.001913
6212	-0.001947
6213	-0.001849
6214	-0.001658
6215	-0.001543
6216	-0.001467
6217	-0.001411
6218	-0.001522
6219	-0.001577
6220	-0.001604
6221	-0.001559
6222	-0.001573
6223	-0.001507
6224	-0.001636
6225	-0.00164
6226	-0.001569
6227	-0.001446
6228	-0.001465
6229	-0.00165
6230	-0.001892
6231	-0.001883
6232	-0.001518
6233	-0.00122
6234	-0.001429
6235	-0.001596
6236	-0.00167
6237	-0.001711
6238	0
6239	0
6240	-0.000281
6241	-0.000569
6242	-0.000769
6243	-0.000655
6244	-0.000525
6245	-0.000408
6246	-0.000462
6247	-0.000347
6248	-0.000237
6249	-0.000224
6250	-0.000166
6251	-0.000272
6252	-0.000364
6253	-0.000399
6254	-0.000314
6255	-0.000452
6256	-0.000641
6257	-0.000531
6258	-9.6e-05
6259	7.9e-05
6260	-0.000243
6261	-0.000505
6262	-0.000534
6263	-0.000706
6264	-0.000914
6265	-0.000962
6266	-0.001046
6267	-0.000899
6268	-0.000911
6269	-0.000896
6270	-0.000943
6271	-0.000915
6272	-0.001017
6273	-0.00106
6274	-0.000891
6275	-0.000836
6276	-0.000713
6277	-0.000556
6278	-0.000658
6279	-0.000833
6280	-0.000986
6281	-0.001152
6282	-0.00131
6283	-0.001216
6284	-0.001136
6285	-0.000935
6286	-0.00091
6287	-0.001037
6288	-0.001252
6289	-0.001258
6290	-0.001187
6291	-0.001081
6292	-0.001189
6293	-0.001311
6294	-0.001244
6295	-0.001311
6296	-0.001348
6297	-0.001265
6298	-0.001208
6299	-0.001366
6300	-0.001343
6301	-0.000935
6302	-0.000661
6303	-0.000564
6304	-0.000372
6305	-0.000311
6306	-0.000295
6307	-0.000215
6308	-5.3e-05
6309	8e-05
6310	-2.2e-05
6311	-3.2e-05
6312	0.000393
6313	0.000888
6314	0.001142
6315	0.001359
6316	0.001618
6317	0.002026
6318	0.002274
6319	0.002386
6320	0.002503
6321	0.002583
6322	0.002607
6323	0.002506
6324	0.002287
6325	0.002021
6326	0.002049
6327	0.002308
6328	0.002662
6329	0.002834
6330	0.002794
6331	0.002765
6332	0.002959
6333	0.003034
6334	0.003004
6335	0.002891
6336	0.002617
6337	0.002294
6338	0.002262
6339	0.002518
6340	0.002762
6341	0.002689
6342	0.002601
6343	0.002659
6344	0.002745
6345	0.002678
6346	0.002443
6347	0.002367
6348	0.00236
6349	0.002325
6350	0.002171
6351	0.002097
6352	0.002023
6353	0.001859
6354	0.001762
6355	0.001836
6356	0.001799
6357	0.001772
6358	0.001761
6359	0.001639
6360	0.001525
6361	0.001561
6362	0.001707
6363	0.001812
6364	0.001895
6365	0.001901
6366	0.002004
6367	0.001989
6368	0.001841
6369	0.001726
6370	0.001668
6371	0.001575
6372	0.001321
6373	0.001332
6374	0.001545
6375	0.001728
6376	0.001739
6377	0.001718
6378	0.00171
6379	0.001677
6380	0.001669
6381	0.001924
6382	0.002069
6383	0.001959
6384	0.00162
6385	0.001598
6386	0.001591
6387	0.001546
6388	0.001769
6389	0.001859
6390	0.001972
6391	0.001748
6392	0.001579
6393	0.001382
6394	0.001423
6395	0.001526
6396	0.00181
6397	0.001982
6398	0.001997
6399	0.001704
6400	0.001624
6401	0.001502
6402	0.001514
6403	0.001329
6404	0.001282
6405	0.001283
6406	0.001406
6407	0.001392
6408	0.001529
6409	0.001447
6410	0.001439
6411	0.001348
6412	0.00138
6413	0.001305
6414	0.001222
6415	0.001194
6416	0.001154
6417	0.001005
6418	0.001171
6419	0.001132
6420	0.001172
6421	0.001135
6422	0.001195
6423	0.001064
6424	0.000951
6425	0.000855
6426	0.000845
6427	0.000638
6428	0.000416
6429	0.000469
6430	0.000504
6431	0.000458
6432	0.000562
6433	0.00067
6434	0.000619
6435	0.00035
6436	0.000364
6437	0.000459
6438	0.000401
6439	0.000396
6440	0.000279
6441	0.000288
6442	0.000517
6443	0.000574
6444	0.000577
6445	0.000639
6446	0.000685
6447	0.000601
6448	0.000421
6449	0.000468
6450	0.000603
6451	0.000621
6452	0.000509
6453	0.000473
6454	0.000547
6455	0.000595
6456	0.000699
6457	0.000786
6458	0.000703
6459	0.000772
6460	0.000816
6461	0.000879
6462	0.000928
6463	0.000909
6464	0.000805
6465	0.000906
6466	0.000887
6467	0.000894
6468	0.000656
6469	0.000544
6470	0.00056
6471	0.000527
6472	0.000581
6473	0.000644
6474	0.000911
6475	0.000958
6476	0.001035
6477	0.001027
6478	0.001167
6479	0.001113
6480	0.001089
6481	0.000975
6482	0.000869
6483	0.000793
6484	0.000886
6485	0.000866
6486	0.00072
6487	0.000663
6488	0.000798
6489	0.000915
6490	0.000861
6491	0.000845
6492	0.000839
6493	0.000936
6494	0.001136
6495	0.001185
6496	0.001058
6497	0.000977
6498	0.000976
6499	0.001179
6500	0.001197
6501	0.000991
6502	0.001028
6503	0.001197
6504	0.001216
6505	0.001045
6506	0.000838
6507	0.000855
6508	0.000674
6509	0.000716
6510	0.000726
6511	0.000811
6512	0.000572
6513	0.000404
6514	0.000438
6515	0.000506
6516	0.000643
6517	0.00063
6518	0.000725
6519	0.000988
6520	0.001307
6521	0.001271
6522	0.001295
6523	0.001325
6524	0.001483
6525	0.001506
6526	0.001443
6527	0.001388
6528	0.001388
6529	0.001537
6530	0.00134
6531	0.001109
6532	0.001179
6533	0.001275
6534	0.001339
6535	0.001355
6536	0.001369
6537	0.001362
6538	0.001347
6539	0.001117
6540	0.000959
6541	0.000962
6542	0.001032
6543	0.001051
6544	0.000978
6545	0.000982
6546	0.00105
6547	0.001211
6548	0.001198
6549	0.001155
6550	0.001144
6551	0.001253
6552	0.001078
6553	0.000854
6554	0.000649
6555	0.00028
6556	-0.0002
6557	-0.000309
6558	-0.000437
6559	-0.000397
6560	-0.000318
6561	-0.00017
6562	4.2e-05
6563	0.000196
6564	4.9e-05
6565	-0.000247
6566	-0.000251
6567	2.2e-05
6568	0.000105
6569	-5e-05
6570	-0.000143
6571	-3.4e-05
6572	-7.1e-05
6573	-0.000269
6574	-0.000188
6575	2.9e-05
6576	0.000374
6577	0.00051
6578	0.000352
6579	0.00016
6580	0.000127
6581	9.3e-05
6582	-7e-05
6583	4.5e-05
6584	0.000329
6585	0.000343
6586	-5e-06
6587	-0.00025
6588	-0.00013
6589	5.7e-05
6590	6.6e-05
6591	0.000144
6592	0.000191
6593	3.3e-05
6594	-9.7e-05
6595	-6.3e-05
6596	-0.000153
6597	3.6e-05
6598	0.000242
6599	0.000418
6600	0.000428
6601	0.000345
6602	0.000144
6603	9.5e-05
6604	0.000185
6605	0.000349
6606	0.000271
6607	4.2e-05
6608	-9e-06
6609	3.5e-05
6610	1.1e-05
6611	0.000176
6612	0.000251
6613	0.000248
6614	0.000344
6615	0.000344
6616	0.000357
6617	0.000272
6618	0.000186
6619	0.000369
6620	0.000474
6621	0.000458
6622	0.000468
6623	0.000564
6624	0.000474
6625	0.000435
6626	0.000515
6627	0.000618
6628	0.000675
6629	0.000848
6630	0.001054
6631	0.001119
6632	0.001169
6633	0.001101
6634	0.001091
6635	0.001103
6636	0.001075
6637	0.001175
6638	0.001209
6639	0.00117
6640	0.001131
6641	0.001006
6642	0.001012
6643	0.000965
6644	0.001016
6645	0.000935
6646	0.00092
6647	0.001042
6648	0.001048
6649	0.001034
6650	0.000908
6651	0.000923
6652	0.001061
6653	0.001147
6654	0.001064
6655	0.000811
6656	0.000262
6657	-0.000331
6658	-0.000669
6659	-0.000853
6660	-0.000945
6661	-0.000879
6662	-0.000803
6663	-0.000745
6664	-0.000663
6665	-0.000623
6666	-0.000522
6667	-0.000553
6668	-0.000529
6669	-0.000473
6670	-0.000387
6671	-0.000539
6672	-0.000404
6673	-0.000164
6674	-5e-05
6675	-5.5e-05
6676	-9.2e-05
6677	-0.000138
6678	-7.3e-05
6679	7.8e-05
6680	0.000206
6681	5.5e-05
6682	2.5e-05
6683	0.000137
6684	6.8e-05
6685	0.000142
6686	0.000456
6687	0.000479
6688	0.000331
6689	9.4e-05
6690	0.000204
6691	0.000249
6692	0.000309
6693	0.000385
6694	0.000377
6695	0.000352
6696	0.000397
6697	0.000314
6698	0.000435
6699	0.000709
6700	0.000886
6701	0.001051
6702	0.001163
6703	0.001173
6704	0.001229
6705	0.001027
6706	0.001158
6707	0.0015
6708	0.00141
6709	0.001196
6710	0.001077
6711	0.001181
6712	0.001362
6713	0.001409
6714	0.001475
6715	0.001667
6716	0.001624
6717	0.001461
6718	0.001363
6719	0.001179
6720	0.001113
6721	0.001207
6722	0.001281
6723	0.001284
6724	0.001245
6725	0.001248
6726	0.001116
6727	0.001196
6728	0.001211
6729	0.00124
6730	0.001105
6731	0.000913
6732	0.000804
6733	0.000627
6734	-1.9e-05
6735	-0.000803
6736	-0.001016
6737	-0.000989
6738	-0.000855
6739	-0.000487
6740	-0.000311
6741	-0.000464
6742	-0.000656
6743	-0.000581
6744	-0.000441
6745	-0.000488
6746	-0.000541
6747	-0.000417
6748	-0.0004
6749	-0.000335
6750	-0.000262
6751	-0.000309
6752	-0.000236
6753	-0.000298
6754	-0.000224
6755	-0.000331
6756	-0.000295
6757	-0.000127
6758	0.000146
6759	0.00021
6760	0.000146
6761	-0.000264
6762	-0.000377
6763	-0.000381
6764	-0.000269
6765	-0.000393
6766	-0.000627
6767	-0.000631
6768	-0.000245
6769	3.4e-05
6770	-9.9e-05
6771	-0.000332
6772	-0.000388
6773	-0.000294
6774	-0.000343
6775	-0.00034
6776	-0.000381
6777	-0.000159
6778	-1.1e-05
6779	8.5e-05
6780	-5.8e-05
6781	-0.000227
6782	-0.000118
6783	-1.6e-05
6784	-0.000263
6785	-0.000379
6786	-1.2e-05
6787	0.000349
6788	0.000473
6789	0.000166
6790	-1e-05
6791	6.4e-05
6792	0.000286
6793	0.000218
6794	2.6e-05
6795	-3.9e-05
6796	-4.9e-05
6797	0.000109
6798	0.000402
6799	0.000491
6800	0.000239
6801	0.000146
6802	0.000668
6803	0.000983
6804	0.001048
6805	0.000954
6806	0.000898
6807	0.000821
6808	0.001067
6809	0.001411
6810	0.001186
6811	0.000852
6812	0.000881
6813	0.001045
6814	0.000961
6815	0.000812
6816	0.000728
6817	0.000795
6818	0.000748
6819	0.000722
6820	0.000869
6821	0.000801
6822	0.00021
6823	-0.000467
6824	-0.000303
6825	8.3e-05
6826	0.000333
6827	0.000129
6828	-0.000115
6829	-0.000342
6830	-0.000545
6831	-0.000689
6832	-0.000687
6833	-0.000677
6834	-0.000659
6835	-0.000648
6836	-0.000701
6837	-0.000944
6838	-0.001197
6839	-0.001283
6840	-0.001269
6841	-0.001224
6842	-0.000911
6843	-0.000722
6844	-0.000841
6845	-0.000949
6846	-0.000932
6847	-0.000981
6848	-0.001163
6849	-0.001228
6850	-0.001101
6851	-0.001023
6852	-0.001029
6853	-0.001075
6854	-0.001128
6855	-0.001167
6856	-0.001057
6857	-0.00112
6858	-0.001067
6859	-0.001013
6860	-0.000977
6861	-0.000779
6862	-0.000828
6863	-0.000856
6864	-0.000815
6865	-0.000724
6866	-0.000803
6867	-0.000801
6868	-0.00074
6869	-0.0008
6870	-0.000832
6871	-0.000872
6872	-0.000742
6873	-0.000764
6874	-0.000699
6875	-0.000565
6876	-0.00056
6877	-0.000631
6878	-0.000828
6879	-0.00102
6880	-0.000873
6881	-0.000635
6882	-0.000641
6883	-0.000906
6884	-0.001041
6885	-0.000872
6886	-0.000644
6887	-0.000522
6888	-0.000284
6889	-0.000332
6890	-0.000409
6891	-0.00058
6892	-0.000515
6893	-0.000441
6894	-0.000449
6895	-0.000554
6896	-0.000487
6897	-0.000441
6898	-0.000465
6899	-0.000633
6900	-0.000503
6901	-0.00049
6902	-0.000476
6903	-0.00031
6904	-0.000332
6905	-0.000414
6906	-0.000515
6907	-0.000331
6908	-0.000157
6909	-0.000249
6910	-0.000314
6911	-0.000416
6912	-0.00052
6913	-0.00035
6914	-3.4e-05
6915	7e-06
6916	-0.000116
6917	-0.000337
6918	-0.000383
6919	-0.00057
6920	-0.000559
6921	-0.000566
6922	-0.000493
6923	-0.000406
6924	-0.000359
6925	-0.000473
6926	-0.000707
6927	-0.000705
6928	-0.000534
6929	-0.000624
6930	-0.000586
6931	-0.000568
6932	-0.000631
6933	-0.000643
6934	-0.000447
6935	-0.000407
6936	-0.000539
6937	-0.000558
6938	-0.000509
6939	-0.000402
6940	-0.000467
6941	-0.000468
6942	-0.00047
6943	-0.000315
6944	-0.000275
6945	-0.000378
6946	-0.000261
6947	-0.000274
6948	-0.000402
6949	-0.000495
6950	-0.000502
6951	-0.000615
6952	-0.000634
6953	-0.000539
6954	-0.000375
6955	-0.000466
6956	-0.000664
6957	-0.000698
6958	-0.000655
6959	-0.000638
6960	-0.000726
6961	-0.000734
6962	-0.000658
6963	-0.000868
6964	-0.000915
6965	-0.000831
6966	-0.000599
6967	-0.000511
6968	-0.000616
6969	-0.000737
6970	-0.000863
6971	-0.000912
6972	-0.000936
6973	-0.000816
6974	-0.000792
6975	-0.000783
6976	-0.000751
6977	-0.00076
6978	-0.000892
6979	-0.0007
6980	-0.000724
6981	-0.00089
6982	-0.001006
6983	-0.000964
6984	-0.000915
6985	-0.000904
6986	-0.000915
6987	-0.000851
6988	-0.000778
6989	-0.00078
6990	-0.00083
6991	-0.000836
6992	-0.000892
6993	-0.000865
6994	-0.000755
6995	-0.000549
6996	-0.000667
6997	-0.000851
6998	-0.000967
6999	-0.000946
7000	-0.000874
7001	-0.000811
7002	-0.000802
7003	-0.000783
7004	-0.000791
7005	-0.000949
7006	-0.000854
7007	-0.000751
7008	-0.000758
7009	-0.000844
7010	-0.000817
7011	-0.000808
7012	-0.00074
7013	-0.000708
7014	-0.000625
7015	-0.000592
7016	-0.000451
7017	-0.00048
7018	-0.000619
7019	-0.000816
7020	-0.000905
7021	-0.000844
7022	-0.000994
7023	-0.001081
7024	-0.000993
7025	-0.000888
7026	-0.000823
7027	-0.000761
7028	-0.000672
7029	-0.000609
7030	-0.000553
7031	-0.000417
7032	-0.000328
7033	-0.000333
7034	-0.000425
7035	-0.000516
7036	-0.000482
7037	-0.0003
7038	-0.00022
7039	-0.000395
7040	-0.00046
7041	-0.000291
7042	-0.000264
7043	-0.000433
7044	-0.000556
7045	-0.000388
7046	-0.000414
7047	-0.000605
7048	-0.000747
7049	-0.000808
7050	-0.00083
7051	-0.000731
7052	-0.00081
7053	-0.000894
7054	-0.000846
7055	-0.000867
7056	-0.000916
7057	-0.001078
7058	-0.00099
7059	-0.000869
7060	-0.000889
7061	-0.000736
7062	-0.000683
7063	-0.000682
7064	-0.000684
7065	-0.00077
7066	-0.000996
7067	-0.001111
7068	-0.001135
7069	-0.000924
7070	-0.000825
7071	-0.000817
7072	-0.000773
7073	-0.000849
7074	-0.000894
7075	-0.00087
7076	-0.000771
7077	-0.000677
7078	-0.000546
7079	-0.000467
7080	-0.000562
7081	-0.000446
7082	-0.000432
7083	-0.00064
7084	-0.000675
7085	-0.000603
7086	-0.000543
7087	-0.000763
7088	-0.000653
7089	-0.000574
7090	-0.000457
7091	-0.00049
7092	-0.000535
7093	-0.000662
7094	-0.000587
7095	-0.000552
7096	-0.000491
7097	-0.000456
7098	-0.00058
7099	-0.00077
7100	-0.000802
7101	-0.000567
7102	-0.000504
7103	-0.000569
7104	-0.000687
7105	-0.00055
7106	-0.000478
7107	-0.000509
7108	-0.000593
7109	-0.000714
7110	-0.000728
7111	-0.000619
7112	-0.000546
7113	-0.000667
7114	-0.000717
7115	-0.00082
7116	-0.000748
7117	-0.000743
7118	-0.000724
7119	-0.000799
7120	-0.000745
7121	-0.000561
7122	-0.000605
7123	-0.00062
7124	-0.000684
7125	-0.000784
7126	-0.000818
7127	-0.000709
7128	-0.000643
7129	-0.000871
7130	-0.001009
7131	-0.000955
7132	-0.000789
7133	-0.000713
7134	-0.000692
7135	-0.000574
7136	-0.000582
7137	-0.000566
7138	-0.000806
7139	-0.000826
7140	-0.000871
7141	-0.000958
7142	-0.001027
7143	-0.000847
7144	-0.000655
7145	-0.000556
7146	-0.000464
7147	-0.000407
7148	-0.00047
7149	-0.000578
7150	-0.000649
7151	-0.000779
7152	-0.000855
7153	-0.000781
7154	-0.000562
7155	-0.000499
7156	-0.000678
7157	-0.00066
7158	-0.000694
7159	-0.000756
7160	-0.000859
7161	-0.000907
7162	-0.000883
7163	-0.000706
7164	-0.000423
7165	-0.000256
7166	-0.000358
7167	-0.000485
7168	-0.000478
7169	-0.000445
7170	-0.000493
7171	-0.000578
7172	-0.000743
7173	-0.000699
7174	-0.000625
7175	-0.000619
7176	-0.000815
7177	-0.000883
7178	-0.000833
7179	-0.000636
7180	-0.000506
7181	-0.000555
7182	-0.000633
7183	-0.000731
7184	-0.000596
7185	-0.000629
7186	-0.000607
7187	-0.000627
7188	-0.000737
7189	-0.000724
7190	-0.000513
7191	-0.000379
7192	-0.000546
7193	-0.000806
7194	-0.000839
7195	-0.000565
7196	-0.000412
7197	-0.000512
7198	-0.000695
7199	-0.000775
7200	-0.000788
7201	-0.000639
7202	-0.000586
7203	-0.000674
7204	-0.00063
7205	-0.000612
7206	-0.000457
7207	-0.00048
7208	-0.000586
7209	-0.000697
7210	-0.000694
7211	-0.000629
7212	-0.000469
7213	-0.000446
7214	-0.000755
7215	-0.000639
7216	-0.00046
7217	-0.00046
7218	-0.000464
7219	-0.000553
7220	-0.000553
7221	-0.000563
7222	-0.000526
7223	-0.000371
7224	-0.000196
7225	-0.000393
7226	-0.000676
7227	-0.000642
7228	-0.000571
7229	-0.000625
7230	-0.000728
7231	-0.000776
7232	-0.000778
7233	-0.000503
7234	-0.000255
7235	-0.000195
7236	-0.000205
7237	-0.000217
7238	-0.000187
7239	-0.000187
7240	-0.000273
7241	-0.000263
7242	-0.00031
7243	-0.000463
7244	-0.00052
7245	-0.000503
7246	-0.000414
7247	-0.000357
7248	-0.000244
7249	-0.00035
7250	-0.000364
7251	-0.000437
7252	-0.000508
7253	-0.000546
7254	-0.000502
7255	-0.000301
7256	-0.000117
7257	-0.000251
7258	-0.000506
7259	-0.000427
7260	-0.000399
7261	-0.000415
7262	-0.000521
7263	-0.000635
7264	-0.000547
7265	-0.000485
7266	-0.000548
7267	-0.000541
7268	-0.000524
7269	-0.000731
7270	-0.000599
7271	-0.000372
7272	-0.000476
7273	-0.000494
7274	-0.000449
7275	-0.000529
7276	-0.000502
7277	-0.0003
7278	-0.000364
7279	-0.000506
7280	-0.000559
7281	-0.000554
7282	-0.000501
7283	-0.000528
7284	-0.000514
7285	-0.000532
7286	-0.000666
7287	-0.000789
7288	-0.000652
7289	-0.000423
7290	-0.000421
7291	-0.00049
7292	-0.000466
7293	-0.000481
7294	-0.000296
7295	-0.000291
7296	-0.00025
7297	-0.000102
7298	-9e-05
7299	-0.000244
7300	-0.000475
7301	-0.000525
7302	-0.000487
7303	-0.000475
7304	-0.000511
7305	-0.000537
7306	-0.000571
7307	-0.000508
7308	-0.000419
7309	-0.00039
7310	-0.000349
7311	-0.000375
7312	-0.000374
7313	-0.000332
7314	-0.000383
7315	-0.000245
7316	-0.000402
7317	-0.000576
7318	-0.000553
7319	-0.00061
7320	-0.000687
7321	-0.000726
7322	-0.000817
7323	-0.000841
7324	-0.000814
7325	-0.000887
7326	-0.000944
7327	-0.000881
7328	-0.000894
7329	-0.000865
7330	-0.000697
7331	-0.000392
7332	-0.00039
7333	-0.000398
7334	-0.000428
7335	-0.000601
7336	-0.000813
7337	-0.000882
7338	-0.001021
7339	-0.000862
7340	-0.000706
7341	-0.000616
7342	-0.000736
7343	-0.000756
7344	-0.000761
7345	-0.000735
7346	-0.000748
7347	-0.000733
7348	-0.000742
7349	-0.000757
7350	-0.00075
7351	-0.000679
7352	-0.000584
7353	-0.000632
7354	-0.0007
7355	-0.000929
7356	-0.000857
7357	-0.000611
7358	-0.000514
7359	-0.000546
7360	-0.000774
7361	-0.000636
7362	-0.000458
7363	-0.000586
7364	-0.000859
7365	-0.000964
7366	-0.00095
7367	-0.000849
7368	-0.000925
7369	-0.001038
7370	-0.001005
7371	-0.001118
7372	-0.00115
7373	-0.001021
7374	-0.000892
7375	-0.000968
7376	-0.001042
7377	-0.000987
7378	-0.001117
7379	-0.00107
7380	-0.001009
7381	-0.000978
7382	-0.00083
7383	-0.000854
7384	-0.000709
7385	-0.000637
7386	-0.000864
7387	-0.000999
7388	-0.000942
7389	-0.000911
7390	-0.001007
7391	-0.001035
7392	-0.000806
7393	-0.000743
7394	-0.000676
7395	-0.000738
7396	-0.000899
7397	-0.000872
7398	-0.00078
7399	-0.000777
7400	-0.000886
7401	-0.001031
7402	-0.001043
7403	-0.000917
7404	-0.000813
7405	-0.000904
7406	-0.000874
7407	-0.000917
7408	-0.001077
7409	-0.000982
7410	-0.000728
7411	-0.000592
7412	-0.00062
7413	-0.000818
7414	-0.000935
7415	-0.000924
7416	-0.000851
7417	-0.000595
7418	-0.000368
7419	-0.00031
7420	-0.000366
7421	-0.000483
7422	-0.000493
7423	-0.000631
7424	-0.000711
7425	-0.000472
7426	-0.000539
7427	-0.000507
7428	-0.00048
7429	-0.000544
7430	-0.000814
7431	-0.000672
7432	-0.000589
7433	-0.000558
7434	-0.00043
7435	-0.00014
7436	-0.000186
7437	-0.000293
7438	-0.000382
7439	-0.000428
7440	-0.000496
7441	-0.000458
7442	-0.000469
7443	-0.000673
7444	-0.000951
7445	-0.000765
7446	-0.000548
7447	-0.000368
7448	-0.000347
7449	-0.000431
7450	-0.000565
7451	-0.000569
7452	-0.000502
7453	-0.000597
7454	-0.000778
7455	-0.000956
7456	-0.000771
7457	-0.000608
7458	-0.000544
7459	-0.000546
7460	-0.000448
7461	-0.000423
7462	-0.000511
7463	-0.000537
7464	-0.000524
7465	-0.000575
7466	-0.0005
7467	-0.000459
7468	-0.000609
7469	-0.000892
7470	-0.000798
7471	-0.000694
7472	-0.000762
7473	-0.000715
7474	-0.000602
7475	-0.000409
7476	-0.000347
7477	-0.000342
7478	-0.000465
7479	-0.000445
7480	-0.000417
7481	-0.000597
7482	-0.000617
7483	-0.000655
7484	-0.000597
7485	-0.00057
7486	-0.000569
7487	-0.000529
7488	-0.00044
7489	-0.000302
7490	-0.000391
7491	-0.000592
7492	-0.000641
7493	-0.000585
7494	-0.000781
7495	-0.000817
7496	-0.000723
7497	-0.00076
7498	-0.000671
7499	-0.000453
7500	-0.00045
7501	-0.000647
7502	-0.00088
7503	-0.000921
7504	-0.001006
7505	-0.000841
7506	-0.000819
7507	-0.000711
7508	-0.000862
7509	-0.000909
7510	-0.000884
7511	-0.000761
7512	-0.000879
7513	-0.000864
7514	-0.00092
7515	-0.000985
7516	-0.000966
7517	-0.000794
7518	-0.000804
7519	-0.000734
7520	-0.000661
7521	-0.000586
7522	-0.000576
7523	-0.000497
7524	-0.000714
7525	-0.000806
7526	-0.000598
7527	-0.000507
7528	-0.000695
7529	-0.000817
7530	-0.000937
7531	-0.000961
7532	-0.000845
7533	-0.000783
7534	-0.000812
7535	-0.000715
7536	-0.000755
7537	-0.000852
7538	-0.000662
7539	-0.000541
7540	-0.000813
7541	-0.000905
7542	-0.0006
7543	-0.000418
7544	-0.000474
7545	-0.000716
7546	-0.000863
7547	-0.000671
7548	-0.000561
7549	-0.000631
7550	-0.000797
7551	-0.000645
7552	-0.000359
7553	-0.000415
7554	-0.000629
7555	-0.000913
7556	-0.000975
7557	-0.000932
7558	-0.000915
7559	-0.000896
7560	-0.000893
7561	-0.000868
7562	-0.000863
7563	-0.000715
7564	-0.000714
7565	-0.000726
7566	-0.0007
7567	-0.000542
7568	-0.00069
7569	-0.000635
7570	-0.00058
7571	-0.000601
7572	-0.000862
7573	-0.000895
7574	-0.000735
7575	-0.000734
7576	-0.000918
7577	-0.001021
7578	-0.000941
7579	-0.000897
7580	-0.001028
7581	-0.000958
7582	-0.000998
7583	-0.001056
7584	-0.00105
7585	-0.00087
7586	-0.000814
7587	-0.00089
7588	-0.000918
7589	-0.000744
7590	-0.000612
7591	-0.000636
7592	-0.000827
7593	-0.00085
7594	-0.000792
7595	-0.000834
7596	-0.000901
7597	-0.00095
7598	-0.001116
7599	-0.001327
7600	-0.001204
7601	-0.001018
7602	-0.001085
7603	-0.001184
7604	-0.000908
7605	-0.000845
7606	-0.000912
7607	-0.000948
7608	-0.000832
7609	-0.00103
7610	-0.001252
7611	-0.001143
7612	-0.0009
7613	-0.000823
7614	-0.000876
7615	-0.001026
7616	-0.000911
7617	-0.000867
7618	-0.000888
7619	-0.00086
7620	-0.00094
7621	-0.001022
7622	-0.001139
7623	-0.001034
7624	-0.000843
7625	-0.000685
7626	-0.000685
7627	-0.000638
7628	-0.000692
7629	-0.000767
7630	-0.000747
7631	-0.000622
7632	-0.000494
7633	-0.000449
7634	-0.00067
7635	-0.000655
7636	-0.000536
7637	-0.000607
7638	-0.000554
7639	-0.000416
7640	-0.000424
7641	-0.000384
7642	-0.000323
7643	-0.000472
7644	-0.000625
7645	-0.000746
7646	-0.000672
7647	-0.000662
7648	-0.000441
7649	-0.000306
7650	-0.000339
7651	-0.000529
7652	-0.00063
7653	-0.000572
7654	-0.000461
7655	-0.000431
7656	-0.000253
7657	-0.000323
7658	-0.000515
7659	-0.000578
7660	-0.000601
7661	-0.000623
7662	-0.000651
7663	-0.000599
7664	-0.000501
7665	-0.000247
7666	-0.000288
7667	-0.000342
7668	-0.000534
7669	-0.000656
7670	-0.000619
7671	-0.000629
7672	-0.000624
7673	-0.000677
7674	-0.000698
7675	-0.000694
7676	-0.0008
7677	-0.000739
7678	-0.00053
7679	-0.000365
7680	-0.000429
7681	-0.000505
7682	-0.000396
7683	-0.000371
7684	-0.000441
7685	-0.000465
7686	-0.000482
7687	-0.000601
7688	-0.000637
7689	-0.000862
7690	-0.000831
7691	-0.000782
7692	-0.000679
7693	-0.000589
7694	-0.000478
7695	-0.000434
7696	-0.000461
7697	-0.00048
7698	-0.000574
7699	-0.000505
7700	-0.000485
7701	-0.000504
7702	-0.000467
7703	-0.000427
7704	-0.000469
7705	-0.000493
7706	-0.000504
7707	-0.000601
7708	-0.000765
7709	-0.000913
7710	-0.000895
7711	-0.000806
7712	-0.000592
7713	-0.000484
7714	-0.000353
7715	-0.000433
7716	-0.000501
7717	-0.000532
7718	-0.000468
7719	-0.000469
7720	-0.000543
7721	-0.000493
7722	-0.000429
7723	-0.000616
7724	-0.000827
7725	-0.000949
7726	-0.000778
7727	-0.000675
7728	-0.00066
7729	-0.000723
7730	-0.000588
7731	-0.000702
7732	-0.000718
7733	-0.000784
7734	-0.000848
7735	-0.000744
7736	-0.000599
7737	-0.000496
7738	-0.000428
7739	-0.000397
7740	-0.000446
7741	-0.000403
7742	-0.000612
7743	-0.000816
7744	-0.000784
7745	-0.000584
7746	-0.000581
7747	-0.000703
7748	-0.000714
7749	-0.000515
7750	-0.000402
7751	-0.000479
7752	-0.000539
7753	-0.000459
7754	-0.000539
7755	-0.000718
7756	-0.000643
7757	-0.000531
7758	-0.000674
7759	-0.000739
7760	-0.000748
7761	-0.000797
7762	-0.000588
7763	-0.000293
7764	-0.000244
7765	-0.000514
7766	-0.000548
7767	-0.000436
7768	-0.00043
7769	-0.000622
7770	-0.000879
7771	-0.000981
7772	-0.00087
7773	-0.000859
7774	-0.000812
7775	-0.000782
7776	-0.000719
7777	-0.000728
7778	-0.000721
7779	-0.000683
7780	-0.000704
7781	-0.000791
7782	-0.000874
7783	-0.000854
7784	-0.000842
7785	-0.000862
7786	-0.000866
7787	-0.000908
7788	-0.000818
7789	-0.000819
7790	-0.00077
7791	-0.000634
7792	-0.000708
7793	-0.000766
7794	-0.000813
7795	-0.000622
7796	-0.000605
7797	-0.000568
7798	-0.000474
7799	-0.000422
7800	-0.000474
7801	-0.000439
7802	-0.000516
7803	-0.000487
7804	-0.000518
7805	-0.000534
7806	-0.000657
7807	-0.00068
7808	-0.000495
7809	-0.000496
7810	-0.000555
7811	-0.000531
7812	-0.000603
7813	-0.000564
7814	-0.00043
7815	-0.000422
7816	-0.000455
7817	-0.000382
7818	-0.000548
7819	-0.000586
7820	-0.00072
7821	-0.000838
7822	-0.000926
7823	-0.000731
7824	-0.000466
7825	-0.000406
7826	-0.0006
7827	-0.000589
7828	-0.000564
7829	-0.000458
7830	-0.000348
7831	-0.000216
7832	-0.000244
7833	-0.000168
7834	-2.2e-05
7835	-0.000227
7836	-0.0002
7837	-0.000434
7838	-0.000624
7839	-0.000684
7840	-0.000571
7841	-0.000504
7842	-0.000315
7843	-0.000201
7844	-0.000184
7845	-0.000315
7846	-0.00026
7847	-0.000442
7848	-0.000543
7849	-0.000404
7850	-0.000433
7851	-0.000425
7852	-0.000372
7853	-0.000425
7854	-0.00049
7855	-0.000655
7856	-0.000639
7857	-0.000641
7858	-0.00053
7859	-0.000501
7860	-0.000597
7861	-0.000687
7862	-0.000578
7863	-0.000538
7864	-0.00065
7865	-0.000682
7866	-0.000794
7867	-0.000797
7868	-0.000625
7869	-0.000639
7870	-0.0006
7871	-0.000651
7872	-0.000611
7873	-0.000552
7874	-0.000583
7875	-0.000633
7876	-0.000721
7877	-0.00065
7878	-0.000587
7879	-0.000668
7880	-0.000707
7881	-0.000721
7882	-0.000946
7883	-0.001011
7884	-0.000832
7885	-0.000942
7886	-0.001073
7887	-0.000902
7888	-0.000966
7889	-0.001083
7890	-0.001248
7891	-0.001338
7892	-0.001316
7893	-0.001385
7894	-0.001326
7895	-0.001323
7896	-0.001366
7897	-0.001263
7898	-0.001149
7899	-0.001204
7900	-0.001233
7901	-0.001352
7902	-0.001379
7903	-0.001327
7904	-0.001298
7905	-0.00114
7906	-0.00108
7907	-0.001177
7908	-0.001318
7909	-0.001273
7910	-0.001119
7911	-0.001084
7912	-0.001098
7913	-0.00124
7914	-0.001256
7915	-0.001321
7916	-0.001208
7917	-0.00101
7918	-0.001052
7919	-0.001201
7920	-0.001163
7921	-0.000754
7922	-0.000679
7923	-0.000853
7924	-0.001091
7925	-0.001088
7926	-0.000849
7927	-0.000635
7928	-0.0007
7929	-0.000871
7930	-0.000733
7931	-0.000631
7932	-0.000581
7933	-0.000668
7934	-0.000628
7935	-0.000317
7936	-0.00021
7937	-0.00018
7938	-0.000282
7939	-0.000487
7940	-0.000526
7941	-0.000624
7942	-0.000582
7943	-0.000416
7944	-0.000546
7945	-0.000597
7946	-0.000594
7947	-0.000685
7948	-0.000756
7949	-0.000442
7950	-0.000511
7951	-0.000591
7952	-0.000337
7953	-0.000129
7954	-0.000104
7955	-0.00044
7956	-0.000469
7957	-0.000527
7958	-0.000528
7959	-0.000503
7960	-0.000501
7961	-0.000356
7962	-0.000359
7963	-0.00043
7964	-0.000524
7965	-0.000478
7966	-0.000373
7967	-0.000304
7968	-8.3e-05
7969	6e-05
7970	-3.3e-05
7971	-0.000186
7972	-0.000253
7973	-0.000251
7974	2.9e-05
7975	0.000353
7976	0.000304
7977	0.000194
7978	0.000163
7979	0.000359
7980	0.000462
7981	0.000544
7982	0.000543
7983	0.000516
7984	0.000536
7985	0.00063
7986	0.000758
7987	0.000501
7988	0.000433
7989	0.000366
7990	0.000322
7991	0.000266
7992	0.000493
7993	0.000599
7994	0.000536
7995	0.000667
7996	0.000842
7997	0.000968
7998	0.00094
[truncated: 3,401 more rows]

## Sheet: N359dC 0.95 M
Time	UV
6000	0.015118
6001	0.014921
6002	0.014884
6003	0.01472
6004	0.014679
6005	0.014927
6006	0.015307
6007	0.014955
6008	0.014731
6009	0.014471
6010	0.014665
6011	0.014884
6012	0.015165
6013	0.015033
6014	0.014959
6015	0.01516
6016	0.01542
6017	0.015374
6018	0.015097
6019	0.015014
6020	0.014705
6021	0.014915
6022	0.015072
6023	0.015289
6024	0.015414
6025	0.015524
6026	0.015362
6027	0.01532
6028	0.015608
6029	0.015796
6030	0.015584
6031	0.015507
6032	0.015556
6033	0.015726
6034	0.015447
6035	0.015392
6036	0.015635
6037	0.015484
6038	0.01517
6039	0.015483
6040	0.015646
6041	0.015655
6042	0.015706
6043	0.015868
6044	0.016106
6045	0.016153
6046	0.01609
6047	0.015959
6048	0.016228
6049	0.016466
6050	0.01628
6051	0.016059
6052	0.016159
6053	0.016233
6054	0.016408
6055	0.016201
6056	0.016027
6057	0.016064
6058	0.01569
6059	0.015425
6060	0.015413
6061	0.01528
6062	0.015324
6063	0.015562
6064	0.015349
6065	0.015121
6066	0.015213
6067	0.015253
6068	0.01531
6069	0.014894
6070	0.015083
6071	0.015748
6072	0.016003
6073	0.01608
6074	0.016257
6075	0.016221
6076	0.015938
6077	0.01583
6078	0.015888
6079	0.015477
6080	0.015268
6081	0.015355
6082	0.015518
6083	0.015623
6084	0.015243
6085	0.014931
6086	0.015039
6087	0.014981
6088	0.014886
6089	0.014955
6090	0.015277
6091	0.015662
6092	0.015393
6093	0.015237
6094	0.015045
6095	0.014759
6096	0.014813
6097	0.015001
6098	0.015236
6099	0.015014
6100	0.014731
6101	0.014847
6102	0.015423
6103	0.015255
6104	0.014899
6105	0.014851
6106	0.015097
6107	0.015073
6108	0.014948
6109	0.014864
6110	0.014921
6111	0.014773
6112	0.014601
6113	0.014693
6114	0.014925
6115	0.014882
6116	0.014958
6117	0.014992
6118	0.015035
6119	0.015024
6120	0.015041
6121	0.014987
6122	0.01482
6123	0.014501
6124	0.014554
6125	0.01464
6126	0.014747
6127	0.015017
6128	0.014935
6129	0.015026
6130	0.014864
6131	0.014779
6132	0.014688
6133	0.015079
6134	0.015164
6135	0.014841
6136	0.01469
6137	0.014865
6138	0.014952
6139	0.014804
6140	0.014633
6141	0.014902
6142	0.01532
6143	0.01571
6144	0.015407
6145	0.01501
6146	0.014955
6147	0.014963
6148	0.014901
6149	0.014836
6150	0.01465
6151	0.014373
6152	0.014556
6153	0.014912
6154	0.015033
6155	0.01509
6156	0.014938
6157	0.014789
6158	0.014776
6159	0.014928
6160	0.015105
6161	0.015012
6162	0.014668
6163	0.014721
6164	0.014721
6165	0.014242
6166	0.014187
6167	0.014386
6168	0.014009
6169	0.014065
6170	0.014416
6171	0.014584
6172	0.014305
6173	0.014334
6174	0.014562
6175	0.014585
6176	0.014337
6177	0.01417
6178	0.014056
6179	0.013931
6180	0.013593
6181	0.013622
6182	0.01396
6183	0.013982
6184	0.013979
6185	0.01375
6186	0.013593
6187	0.013468
6188	0.013532
6189	0.013399
6190	0.013365
6191	0.013306
6192	0.013517
6193	0.013643
6194	0.013575
6195	0.013256
6196	0.012877
6197	0.013466
6198	0.014065
6199	0.014069
6200	0.013727
6201	0.013818
6202	0.014053
6203	0.014047
6204	0.013674
6205	0.013388
6206	0.013384
6207	0.01355
6208	0.013516
6209	0.013587
6210	0.013754
6211	0.013811
6212	0.013665
6213	0.01357
6214	0.013529
6215	0.013309
6216	0.013175
6217	0.013081
6218	0.013191
6219	0.013232
6220	0.013211
6221	0.013113
6222	0.013279
6223	0.013272
6224	0.013126
6225	0.012989
6226	0.012816
6227	0.01268
6228	0.01278
6229	0.01337
6230	0.013939
6231	0.013732
6232	0.013463
6233	0.013981
6234	0.014159
6235	0.014189
6236	0.014321
6237	0.014596
6238	0.014379
6239	0
6240	1.8e-05
6241	5.5e-05
6242	-8.1e-05
6243	-0.000616
6244	-0.000676
6245	-0.000616
6246	-0.000443
6247	-0.000653
6248	-0.000722
6249	-0.000499
6250	-4.8e-05
6251	-2.6e-05
6252	2.7e-05
6253	-0.000139
6254	-0.000106
6255	6.5e-05
6256	0.000155
6257	-2.2e-05
6258	-0.000457
6259	-0.000682
6260	-0.000536
6261	1.8e-05
6262	-0.000249
6263	-0.000565
6264	-0.000421
6265	-5e-06
6266	7.2e-05
6267	4.3e-05
6268	-0.000243
6269	-0.000363
6270	-0.000338
6271	-0.000252
6272	-7.4e-05
6273	0.000153
6274	0.000141
6275	-6e-06
6276	-0.000301
6277	-0.000448
6278	-0.000249
6279	-0.000294
6280	-0.000178
6281	-0.000114
6282	0.000167
6283	0.000448
6284	0.000775
6285	0.000969
6286	0.001041
6287	0.000967
6288	0.000831
6289	0.00091
6290	0.001118
6291	0.00135
6292	0.001241
6293	0.001516
6294	0.001819
6295	0.002086
6296	0.001967
6297	0.001762
6298	0.001529
6299	0.001286
6300	0.001043
6301	0.000503
6302	0.000384
6303	0.000564
6304	0.00135
6305	0.001611
6306	0.001497
6307	0.001469
6308	0.001329
6309	0.000745
6310	0.000384
6311	0.000264
6312	0.000339
6313	0.000238
6314	0.000342
6315	0.000492
6316	0.000532
6317	0.000455
6318	0.000178
6319	-0.000242
6320	-0.000185
6321	7e-05
6322	-0.000111
6323	-0.0004
6324	-0.000279
6325	-3.5e-05
6326	0.000185
6327	0.000272
6328	0
6329	-0.000149
6330	0.0002
6331	-9.3e-05
6332	-0.000702
6333	-0.000932
6334	-0.000921
6335	-0.000892
6336	-0.000746
6337	-0.000857
6338	-0.0012
6339	-0.001253
6340	-0.000975
6341	-0.00079
6342	-0.00081
6343	-0.000818
6344	-0.000708
6345	-0.000407
6346	-0.000346
6347	-0.00043
6348	-0.000702
6349	-0.00077
6350	-0.000522
6351	-0.000591
6352	-0.000539
6353	-0.000551
6354	-0.000496
6355	-0.000412
6356	-0.000605
6357	-0.000693
6358	-0.00041
6359	-0.00038
6360	-0.00058
6361	-0.000654
6362	-0.000664
6363	-0.000579
6364	-0.000665
6365	-0.000977
6366	-0.001066
6367	-0.000402
6368	0.00036
6369	0.000269
6370	-1.7e-05
6371	4.2e-05
6372	-4.9e-05
6373	8.6e-05
6374	0.000668
6375	0.001076
6376	0.00098
6377	0.000985
6378	0.000972
6379	0.000886
6380	0.000605
6381	0.00058
6382	0.000503
6383	0.000564
6384	0.000761
6385	0.000758
6386	0.000681
6387	0.00084
6388	0.000858
6389	0.000882
6390	0.000746
6391	0.000839
6392	0.001487
6393	0.001654
6394	0.001467
6395	0.001143
6396	0.000876
6397	0.000737
6398	0.000981
6399	0.001255
6400	0.001591
6401	0.001774
6402	0.001673
6403	0.001788
6404	0.001522
6405	0.000989
6406	0.000408
6407	0.000562
6408	0.000644
6409	0.000625
6410	0.000552
6411	0.00032
6412	0.000171
6413	9.8e-05
6414	0.000116
6415	0.000159
6416	6.8e-05
6417	0.000124
6418	-0.000194
6419	-0.000354
6420	-0.000379
6421	-0.000145
6422	0.000226
6423	0.000314
6424	0.000135
6425	0.000342
6426	0.000715
6427	0.000945
6428	0.000719
6429	0.000882
6430	0.000702
6431	0.000654
6432	0.001029
6433	0.001394
6434	0.001586
6435	0.0021
6436	0.002297
6437	0.002248
6438	0.002546
6439	0.002272
6440	0.002067
6441	0.00191
6442	0.002223
6443	0.002653
6444	0.002536
6445	0.002233
6446	0.002183
6447	0.0023
6448	0.002307
6449	0.002058
6450	0.001947
6451	0.001924
6452	0.002078
6453	0.002132
6454	0.002404
6455	0.002328
6456	0.00211
6457	0.001923
6458	0.002174
6459	0.002148
6460	0.002124
6461	0.002185
6462	0.002238
6463	0.002303
6464	0.002238
6465	0.002401
6466	0.002699
6467	0.002929
6468	0.002705
6469	0.002504
6470	0.002449
6471	0.002604
6472	0.002615
6473	0.00255
6474	0.002849
6475	0.003221
6476	0.002959
6477	0.00282
6478	0.002738
6479	0.002619
6480	0.00241
6481	0.00236
6482	0.002387
6483	0.002229
6484	0.002539
6485	0.002591
6486	0.002648
6487	0.002222
6488	0.002084
6489	0.002098
6490	0.002436
6491	0.002167
6492	0.001895
6493	0.001704
6494	0.001679
6495	0.001914
6496	0.001711
6497	0.000914
6498	-6.6e-05
6499	-0.000353
6500	-0.000454
6501	-0.000344
6502	-0.000328
6503	-0.000298
6504	-0.000182
6505	-0.000335
6506	-0.000295
6507	-0.000199
6508	0.00021
6509	9.6e-05
6510	-7.8e-05
6511	-0.000514
6512	-0.00113
6513	-0.002114
6514	-0.002594
6515	-0.002457
6516	-0.00209
6517	-0.002147
6518	-0.002297
6519	-0.002174
6520	-0.002451
6521	-0.002452
6522	-0.002033
6523	-0.001624
6524	-0.001719
6525	-0.001703
6526	-0.001743
6527	-0.001735
6528	-0.002004
6529	-0.002204
6530	-0.002133
6531	-0.002167
6532	-0.002238
6533	-0.002077
6534	-0.002328
6535	-0.002259
6536	-0.00212
6537	-0.001764
6538	-0.001912
6539	-0.00162
6540	-0.001648
6541	-0.001592
6542	-0.001181
6543	-0.000919
6544	-0.000793
6545	-0.000836
6546	-0.000693
6547	-0.001008
6548	-0.001245
6549	-0.001583
6550	-0.001658
6551	-0.001666
6552	-0.001691
6553	-0.001866
6554	-0.001438
6555	-0.00154
6556	-0.001629
6557	-0.001493
6558	-0.001466
6559	-0.001646
6560	-0.001663
6561	-0.001215
6562	-0.001237
6563	-0.001504
6564	-0.001964
6565	-0.002048
6566	-0.002061
6567	-0.001986
6568	-0.001809
6569	-0.00183
6570	-0.001557
6571	-0.001407
6572	-0.001509
6573	-0.001538
6574	-0.001699
6575	-0.001674
6576	-0.001139
6577	-0.001212
6578	-0.001217
6579	-0.001013
6580	-0.000912
6581	-0.000878
6582	-0.001081
6583	-0.001416
6584	-0.001272
6585	-0.000817
6586	-0.000697
6587	-0.000936
6588	-0.001054
6589	-0.001133
6590	-0.001154
6591	-0.001246
6592	-0.001462
6593	-0.001677
6594	-0.001527
6595	-0.001486
6596	-0.001576
6597	-0.001177
6598	-0.000892
6599	-0.001003
6600	-0.001124
6601	-0.001201
6602	-0.001439
6603	-0.001833
6604	-0.00191
6605	-0.001864
6606	-0.001578
6607	-0.001365
6608	-0.001017
6609	-0.001156
6610	-0.001378
6611	-0.001615
6612	-0.001861
6613	-0.001707
6614	-0.001371
6615	-0.001737
6616	-0.001959
6617	-0.001973
6618	-0.001735
6619	-0.001678
6620	-0.001707
6621	-0.001723
6622	-0.001932
6623	-0.002039
6624	-0.001922
6625	-0.001582
6626	-0.001461
6627	-0.00138
6628	-0.001473
6629	-0.001558
6630	-0.0014
6631	-0.001081
6632	-0.001097
6633	-0.001217
6634	-0.001379
6635	-0.001506
6636	-0.001509
6637	-0.001584
6638	-0.001406
6639	-0.001504
6640	-0.001777
6641	-0.001598
6642	-0.001215
6643	-0.001154
6644	-0.001365
6645	-0.001533
6646	-0.00141
6647	-0.001371
6648	-0.001641
6649	-0.001671
6650	-0.001411
6651	-0.001114
6652	-0.001168
6653	-0.001082
6654	-0.001097
6655	-0.001098
6656	-0.001265
6657	-0.001396
6658	-0.001126
6659	-0.000911
6660	-0.001247
6661	-0.001578
6662	-0.001658
6663	-0.002042
6664	-0.001673
6665	-0.001455
6666	-0.001581
6667	-0.002013
6668	-0.002217
6669	-0.001966
6670	-0.001758
6671	-0.001514
6672	-0.001642
6673	-0.001939
6674	-0.002198
6675	-0.002143
6676	-0.00176
6677	-0.001396
6678	-0.001471
6679	-0.001712
6680	-0.001995
6681	-0.002007
6682	-0.002039
6683	-0.001858
6684	-0.001979
6685	-0.002166
6686	-0.002015
6687	-0.00191
6688	-0.001739
6689	-0.001761
6690	-0.001638
6691	-0.001562
6692	-0.001745
6693	-0.001602
6694	-0.001253
6695	-0.001431
6696	-0.002257
6697	-0.00247
6698	-0.002115
6699	-0.001523
6700	-0.001221
6701	-0.001262
6702	-0.00116
6703	-0.001131
6704	-0.001408
6705	-0.001732
6706	-0.001693
6707	-0.001626
6708	-0.00133
6709	-0.000716
6710	-0.001094
6711	-0.001202
6712	-0.001026
6713	-0.001016
6714	-0.001029
6715	-0.000801
6716	-0.000699
6717	-0.000898
6718	-0.001085
6719	-0.000566
6720	0.00032
6721	0.000273
6722	-0.000204
6723	-0.000551
6724	-0.000524
6725	-0.00034
6726	-0.000559
6727	-0.000533
6728	-0.000475
6729	-0.000295
6730	-0.000503
6731	-0.000439
6732	-0.000261
6733	-0.000426
6734	-0.000467
6735	-0.00049
6736	-0.000778
6737	-0.001363
6738	-0.001412
6739	-0.001188
6740	-0.000799
6741	-0.000509
6742	-0.000186
6743	-0.00033
6744	-0.000384
6745	-0.000299
6746	-0.00025
6747	-0.000411
6748	-0.000327
6749	-0.000423
6750	-0.000495
6751	-0.000332
6752	-0.000288
6753	-0.000305
6754	-0.000505
6755	-0.000347
6756	-0.000136
6757	-0.000133
6758	-0.000499
6759	-0.000427
6760	-5.4e-05
6761	-1.8e-05
6762	-8e-06
6763	-5.6e-05
6764	-0.000341
6765	-0.000725
6766	-0.000626
6767	-0.00045
6768	-0.000427
6769	-0.00053
6770	-0.000427
6771	-0.000654
6772	-0.000531
6773	-0.000251
6774	-0.000287
6775	-0.000786
6776	-0.000852
6777	-0.000538
6778	-0.000166
6779	-0.000287
6780	-0.000699
6781	-0.000767
6782	-0.00059
6783	6.6e-05
6784	-7.3e-05
6785	-0.00037
6786	-0.000881
6787	-0.001162
6788	-0.000812
6789	-0.000241
6790	-1e-06
6791	-0.000223
6792	-0.00091
6793	-0.001053
6794	-0.000759
6795	-0.001218
6796	-0.001343
6797	-0.001399
6798	-0.001485
6799	-0.001576
6800	-0.001449
6801	-0.001431
6802	-0.001649
6803	-0.001688
6804	-0.001507
6805	-0.001522
6806	-0.001316
6807	-0.001221
6808	-0.00119
6809	-0.001142
6810	-0.000871
6811	-0.000581
6812	-0.000494
6813	-0.00079
6814	-0.00091
6815	-0.000794
6816	-0.000714
6817	-0.000989
6818	-0.001053
6819	-0.000858
6820	-0.0005
6821	-0.000347
6822	-9.2e-05
6823	0.000132
6824	0.000557
6825	0.000819
6826	0.000893
6827	0.000874
6828	0.00081
6829	0.000698
6830	0.000691
6831	0.00034
6832	-0.000299
6833	-0.001223
6834	-0.001829
6835	-0.001916
6836	-0.001887
6837	-0.001937
6838	-0.00191
6839	-0.001683
6840	-0.001669
6841	-0.001803
6842	-0.001905
6843	-0.001702
6844	-0.001453
6845	-0.000854
6846	-0.000224
6847	8.6e-05
6848	-0.00018
6849	-0.000541
6850	-0.00067
6851	-0.0011
6852	-0.001429
6853	-0.001203
6854	-0.000824
6855	-0.00074
6856	-0.001005
6857	-0.001329
6858	-0.001543
6859	-0.001823
6860	-0.002161
6861	-0.002007
6862	-0.001194
6863	-0.000836
6864	-0.001453
6865	-0.002129
6866	-0.002017
6867	-0.001727
6868	-0.001917
6869	-0.002173
6870	-0.002233
6871	-0.002298
6872	-0.00243
6873	-0.002263
6874	-0.001947
6875	-0.001945
6876	-0.00236
6877	-0.002263
6878	-0.001999
6879	-0.00174
6880	-0.001592
6881	-0.001575
6882	-0.001532
6883	-0.001366
6884	-0.001204
6885	-0.001163
6886	-0.001385
6887	-0.001495
6888	-0.001591
6889	-0.001372
6890	-0.001229
6891	-0.001414
6892	-0.001376
6893	-0.001302
6894	-0.001008
6895	-0.000988
6896	-0.001196
6897	-0.001122
6898	-0.000931
6899	-0.000781
6900	-0.000411
6901	0.000545
6902	0.001037
6903	0.000866
6904	0.000703
6905	0.000629
6906	0.000507
6907	0.000403
6908	6.7e-05
6909	-0.000211
6910	-0.000264
6911	-0.000325
6912	-0.000502
6913	-0.000529
6914	5.3e-05
6915	-4.5e-05
6916	-0.0003
6917	-0.000674
6918	-0.000809
6919	-0.000875
6920	-0.000551
6921	-0.000411
6922	-0.000251
6923	-0.000296
6924	-0.000329
6925	-0.000445
6926	-0.000564
6927	-0.000544
6928	-0.000417
6929	-0.000863
6930	-0.001208
6931	-0.000967
6932	-0.000602
6933	-0.000705
6934	-0.001235
6935	-0.001481
6936	-0.001439
6937	-0.001116
6938	-6.6e-05
6939	0.001029
6940	0.001494
6941	0.001371
6942	0.001506
6943	0.001777
6944	0.001197
6945	7.7e-05
6946	0.000272
6947	0.000537
6948	2.2e-05
6949	-0.000733
6950	-0.001392
6951	-0.001434
6952	-0.001193
6953	-0.001
6954	-0.001038
6955	-0.001084
6956	-0.001113
6957	-0.001385
6958	-0.001077
6959	-0.000747
6960	-0.000633
6961	-0.00079
6962	-0.000863
6963	-0.000672
6964	-0.000763
6965	-0.001068
6966	-0.001451
6967	-0.001388
6968	-0.001236
6969	-0.001305
6970	-0.00076
6971	-0.000185
6972	-0.000151
6973	-0.000328
6974	-0.00024
6975	0.000318
6976	0.000929
6977	0.000732
6978	0.000128
6979	-0.000108
6980	-0.000112
6981	-0.000384
6982	-0.000256
6983	-0.000105
6984	5.6e-05
6985	0.000262
6986	0.000161
6987	0.000165
6988	0.000366
6989	0.000323
6990	5.3e-05
6991	0.000235
6992	0.000411
6993	0.000204
6994	0.000222
6995	0.000581
6996	0.000656
6997	0.000676
6998	0.000748
6999	0.000802
7000	0.000929
7001	0.001066
7002	0.00121
7003	0.001083
7004	0.000712
7005	0.000621
7006	0.000694
7007	0.000993
7008	0.000721
7009	0.000394
7010	0.000548
7011	0.001054
7012	0.001576
7013	0.001372
7014	0.001043
7015	0.000558
7016	0.00046
7017	0.00059
7018	0.00093
7019	0.001091
7020	0.000719
7021	-0.000229
7022	-0.001067
7023	-0.001067
7024	-0.001086
7025	-0.001137
7026	-0.001337
7027	-0.001255
7028	-0.001207
7029	-0.001057
7030	-0.000905
7031	-0.000887
7032	-0.001115
7033	-0.001152
7034	-0.00126
7035	-0.001562
7036	-0.001719
7037	-0.001768
7038	-0.001607
7039	-0.001824
7040	-0.001855
7041	-0.001432
7042	-0.000809
7043	-0.0008
7044	-0.001642
7045	-0.002013
7046	-0.00194
7047	-0.001843
7048	-0.001937
7049	-0.001751
7050	-0.001634
7051	-0.001678
7052	-0.001766
7053	-0.001738
7054	-0.001405
7055	-0.001333
7056	-0.001706
7057	-0.001971
7058	-0.002016
7059	-0.001911
7060	-0.001675
7061	-0.001707
7062	-0.001379
7063	-0.001318
7064	-0.001174
7065	-0.001064
7066	-0.000449
7067	0.000345
7068	0.000584
7069	6.8e-05
7070	-1.2e-05
7071	0.000101
7072	0.000114
7073	-8.5e-05
7074	9e-05
7075	9.7e-05
7076	0.000265
7077	0.000332
7078	-1e-05
7079	-0.000238
7080	-0.000316
7081	-0.000366
7082	-0.000224
7083	-0.000129
7084	-0.00013
7085	-7.7e-05
7086	-0.000103
7087	0.000184
7088	-0.000379
7089	-0.001074
7090	-0.001516
7091	-0.001094
7092	-5.7e-05
7093	0.000331
7094	0.000331
7095	-0.000241
7096	-0.001351
7097	-0.00168
7098	-0.001117
7099	-0.00056
7100	-0.000281
7101	-0.000125
7102	-0.000162
7103	-3e-05
7104	-0.000114
7105	-0.000225
7106	-0.000585
7107	-0.001275
7108	-0.001164
7109	-0.000623
7110	-0.00054
7111	-0.000388
7112	-0.000531
7113	-0.000423
7114	-0.00052
7115	-0.000551
7116	-0.000683
7117	-0.000855
7118	-0.000895
7119	-0.000936
7120	-0.000845
7121	-0.000902
7122	-0.000778
7123	-0.000907
7124	-0.000705
7125	-0.000421
7126	-0.000613
7127	-0.000644
7128	-0.000301
7129	-0.000164
7130	-0.000843
7131	-0.001483
7132	-0.001815
7133	-0.002112
7134	-0.00201
7135	-0.001138
7136	-0.001239
7137	-0.001714
7138	-0.001832
7139	-0.00125
7140	-0.000515
7141	-0.000602
7142	-0.000792
7143	-0.000847
7144	-0.001049
7145	-0.000979
7146	-0.001161
7147	-0.001213
7148	-0.001208
7149	-0.001148
7150	-0.001279
7151	-0.001454
7152	-0.001425
7153	-0.001566
7154	-0.001819
7155	-0.001874
7156	-0.001749
7157	-0.001487
7158	-0.001479
7159	-0.001551
7160	-0.001626
7161	-0.001101
7162	-0.001117
7163	-0.001438
7164	-0.001761
7165	-0.001303
7166	-0.000943
7167	-0.001005
7168	-0.001113
7169	-0.00023
7170	0.000606
7171	0.000746
7172	0.000529
7173	-0.000183
7174	-0.001056
7175	-0.001436
7176	-0.001721
7177	-0.001723
7178	-0.00127
7179	-0.000774
7180	-0.000889
7181	-0.001465
7182	-0.001253
7183	-0.001164
7184	-0.001072
7185	-0.001304
7186	-0.001249
7187	-0.000523
7188	0.000384
7189	0.000903
7190	0.000384
7191	-3.5e-05
7192	0.000338
7193	0.000474
7194	0.000538
7195	0.000742
7196	0.000931
7197	0.000668
7198	0.000102
7199	0.000195
7200	0.000399
7201	0.000317
7202	0.000293
7203	0.000398
7204	0.000578
7205	0.000879
7206	0.001145
7207	0.001113
7208	0.001017
7209	0.00116
7210	0.001158
7211	0.000995
7212	0.000463
7213	0.000125
7214	-0.000277
7215	-0.000459
7216	-0.000599
7217	-0.000874
7218	-0.001022
7219	-0.000751
7220	-0.000226
7221	1.8e-05
7222	-0.000207
7223	-0.000532
7224	-0.000678
7225	-7.6e-05
7226	0.000243
7227	0.000117
7228	-0.000126
7229	-0.000277
7230	0.000128
7231	0.0005
7232	0.000215
7233	0.000393
7234	0.000318
7235	7.1e-05
7236	-3.2e-05
7237	-0.000279
7238	-0.000563
7239	-0.000109
7240	-7.7e-05
7241	-7.3e-05
7242	3e-05
7243	-7.2e-05
7244	-8.3e-05
7245	0.000369
7246	0.00034
7247	0.00044
7248	0.000326
7249	-0.000323
7250	-0.000817
7251	-0.001073
7252	-0.001017
7253	-0.000957
7254	-0.001208
7255	-0.001287
7256	-0.001305
7257	-0.00115
7258	-0.001168
7259	-0.000961
7260	-0.000821
7261	-0.000922
7262	-0.001226
7263	-0.0012
7264	-0.001088
7265	-0.001187
7266	-0.001137
7267	-0.000656
7268	-0.000853
7269	-0.001307
7270	-0.001686
7271	-0.001237
7272	-0.000557
7273	-0.000268
7274	-0.000312
7275	-0.000484
7276	-0.000731
7277	-0.000758
7278	-0.000445
7279	4.7e-05
7280	-0.000147
7281	-0.000367
7282	-8.2e-05
7283	0.000277
7284	-5.2e-05
7285	0
7286	-0.000121
7287	-0.000121
7288	-0.000276
7289	-0.000113
7290	-0.000207
7291	0.000232
7292	0.000535
7293	0.000777
7294	0.000174
7295	-0.000357
7296	-0.000939
7297	-0.001179
7298	-0.001275
7299	-0.001197
7300	-0.001488
7301	-0.002027
7302	-0.001966
7303	-0.001989
7304	-0.002122
7305	-0.00216
7306	-0.001482
7307	-0.000554
7308	0.000244
7309	-0.000164
7310	-0.000237
7311	-9e-06
7312	0.000302
7313	-0.000202
7314	-0.000506
7315	-3.9e-05
7316	0.000609
7317	0.000899
7318	0.00074
7319	0.000325
7320	0.000651
7321	0.00118
7322	0.001065
7323	0.000417
7324	-6.8e-05
7325	-0.000684
7326	-0.000871
7327	-0.000898
7328	-0.000987
7329	-0.000835
7330	-0.000808
7331	-0.000679
7332	-0.00073
7333	-0.001361
7334	-0.001288
7335	-0.000727
7336	-0.000367
7337	8.1e-05
7338	9.5e-05
7339	-0.000227
7340	-0.000462
7341	-0.000377
7342	0.000318
7343	0.000888
7344	0.000974
7345	0.000676
7346	0.000327
7347	0.000625
7348	0.000858
7349	0.000852
7350	0.000539
7351	0.000665
7352	0.000694
7353	0.000629
7354	0.000598
7355	-5.9e-05
7356	-0.000763
7357	-0.001073
7358	-0.001055
7359	-0.001378
7360	-0.001554
7361	-0.001672
7362	-0.001295
7363	-0.000971
7364	-0.000829
7365	-0.000716
7366	-0.000627
7367	-0.000698
7368	-0.000526
7369	-0.000182
7370	0.000126
7371	9.7e-05
7372	0.000148
7373	0.000298
7374	0.000216
7375	0.000336
7376	0.000194
7377	0.000175
7378	0.000238
7379	0.000238
7380	0.000226
7381	-4.7e-05
7382	-0.00031
7383	-0.000165
7384	-0.000398
7385	-0.000985
7386	-0.001691
7387	-0.001927
7388	-0.002406
7389	-0.002538
7390	-0.002241
7391	-0.001741
7392	-0.001592
7393	-0.001616
7394	-0.001419
7395	-0.001089
7396	-0.000722
7397	-0.00039
7398	-0.000415
7399	-0.000566
7400	-0.000542
7401	-1.1e-05
7402	0.000159
7403	0.000613
7404	0.000615
7405	0.000638
7406	0.000261
7407	-0.000353
7408	-0.001034
7409	-0.001438
7410	-0.001123
7411	-0.000536
7412	1.2e-05
7413	-0.000229
7414	-0.000924
7415	-0.001151
7416	-0.000695
7417	-0.000612
7418	-0.000873
7419	-0.001304
7420	-0.001272
7421	-0.001367
7422	-0.001094
7423	-0.001172
7424	-0.000974
7425	-0.001041
7426	-0.000931
7427	-3.2e-05
7428	0.001013
7429	0.00113
7430	0.001105
7431	0.000574
7432	6.8e-05
7433	-0.000126
7434	-4.4e-05
7435	-5.1e-05
7436	-0.000269
7437	-0.000369
7438	-0.000419
7439	-0.000505
7440	-0.000738
7441	-0.000433
7442	2.2e-05
7443	-0.00017
7444	-0.000345
7445	-0.000662
7446	-0.000461
7447	-0.000285
7448	-0.000365
7449	-0.000367
7450	-0.000228
7451	-6.4e-05
7452	-0.000149
7453	7.3e-05
7454	0.000378
7455	0.000677
7456	0.000599
7457	9.1e-05
7458	5.7e-05
7459	1e-05
7460	9.3e-05
7461	0.000352
7462	0.000469
7463	0.00043
7464	0.000387
7465	0.000381
7466	0.000376
7467	0.000273
7468	0.000267
7469	6.8e-05
7470	0.000323
7471	0.000485
7472	9.2e-05
7473	-0.00022
7474	-0.000239
7475	5.3e-05
7476	0.000112
7477	-0.000269
7478	-2.9e-05
7479	0.000209
7480	0.000185
7481	4.8e-05
7482	0.000146
7483	8.6e-05
7484	0.000155
7485	6.5e-05
7486	-0.000108
7487	-5e-05
7488	0.000148
7489	6.3e-05
7490	0.000149
7491	0.000488
7492	0.000789
7493	0.000639
7494	0.000284
7495	0.000325
7496	7.6e-05
7497	-2.9e-05
7498	-3.8e-05
7499	0.000271
7500	0.000538
7501	0.000112
7502	-0.000213
7503	-0.000387
7504	-0.00015
7505	-0.00043
7506	-0.000428
7507	-0.000118
7508	-0.000283
7509	-0.000675
7510	-0.000455
7511	-0.000302
7512	-0.000354
7513	-0.000272
7514	-7e-05
7515	-0.000155
7516	-9.4e-05
7517	0.000188
7518	0.000245
7519	0.000236
7520	0.000388
7521	6.5e-05
7522	-9.1e-05
7523	0.000187
7524	5.4e-05
7525	0.000163
7526	0.000619
7527	0.000608
7528	0.000411
7529	0.000149
7530	-6.7e-05
7531	1.6e-05
7532	0.000316
7533	0.000641
7534	0.00047
7535	4.2e-05
7536	-3.1e-05
7537	1.8e-05
7538	0.000111
7539	-7.3e-05
7540	-0.000213
7541	-0.000171
7542	-6e-05
7543	-0.000111
7544	4.7e-05
7545	0.000155
7546	0.000145
7547	2.2e-05
7548	0.00013
7549	0.000304
7550	0.000452
7551	0.000351
7552	5.2e-05
7553	-0.000107
7554	-0.000302
7555	-0.000596
7556	-0.000614
7557	-0.000513
7558	1.6e-05
7559	0.000458
7560	0.00027
7561	0.000173
7562	0.000166
7563	0.00049
7564	0.000745
7565	0.000732
7566	0.00055
7567	0.000258
7568	7.4e-05
7569	-6.8e-05
7570	-1e-05
7571	0.000116
7572	0.000302
7573	0.000353
7574	0.000231
7575	0.000231
7576	0.000352
7577	0.000514
7578	0.000458
7579	-0.000122
7580	-0.000244
7581	-0.000256
7582	-4.2e-05
7583	0.000187
7584	-1.4e-05
7585	0.000165
7586	0.00039
7587	0.000226
7588	0.000222
7589	0.000445
7590	0.000792
7591	0.000773
7592	0.000728
7593	0.000803
7594	0.000659
7595	0.000503
7596	0.000641
7597	0.000694
7598	0.001043
7599	0.001192
7600	0.000808
7601	0.000842
7602	0.000777
7603	0.000833
7604	0.000315
7605	2e-05
7606	-0.000184
7607	6.7e-05
7608	0.000192
7609	0.000312
7610	0.000574
7611	0.00056
7612	0.000488
7613	0.00055
7614	0.000546
7615	0.00065
7616	0.00078
7617	0.001016
7618	0.001147
7619	0.001153
7620	0.001046
7621	0.000742
7622	0.000516
7623	0.000552
7624	0.00052
7625	0.00068
7626	0.000669
7627	0.000867
7628	0.000858
7629	0.000653
7630	0.000623
7631	0.000631
7632	0.00049
7633	0.000632
7634	0.000626
7635	0.000467
7636	0.000191
7637	0.000191
7638	-0.000145
7639	-7.3e-05
7640	0.000389
7641	0.000372
7642	0.000137
7643	-0.000119
7644	-0.000181
7645	-0.000139
7646	0.000123
7647	0.000689
7648	0.000378
7649	0.000108
7650	-7.7e-05
7651	3.4e-05
7652	5.8e-05
7653	3.4e-05
7654	-0.000165
7655	2.3e-05
7656	0.000188
7657	0.000301
7658	0.0006
7659	0.000676
7660	0.000882
7661	0.000959
7662	0.00103
7663	0.000787
7664	0.001051
7665	0.001111
7666	0.001007
7667	0.000581
7668	0.000741
7669	0.000652
7670	0.000348
7671	0.000315
7672	0.000374
7673	0.00019
7674	0.000152
7675	9.4e-05
7676	0.000231
7677	0.000265
7678	5e-05
7679	8.2e-05
7680	0.000161
7681	9.7e-05
7682	0.00033
7683	0.000736
7684	0.000521
7685	0.000486
7686	0.000672
7687	0.000909
7688	0.000853
7689	0.000993
7690	0.0011
7691	0.001255
7692	0.001249
7693	0.001041
7694	0.000933
7695	0.001024
7696	0.000988
7697	0.000846
7698	0.000717
7699	0.000606
7700	0.000591
7701	0.000727
7702	0.000813
7703	0.001037
7704	0.001352
7705	0.001196
7706	0.001127
7707	0.001121
7708	0.001143
7709	0.000772
7710	0.000606
7711	0.000597
7712	0.000641
7713	0.000696
7714	0.00102
7715	0.001318
7716	0.001182
7717	0.000723
7718	0.000735
7719	0.000973
7720	0.001228
7721	0.001323
7722	0.000918
7723	0.000715
7724	0.000576
7725	0.00115
7726	0.001358
7727	0.001279
7728	0.00123
7729	0.001331
7730	0.00144
7731	0.001331
7732	0.001226
7733	0.001446
7734	0.001324
7735	0.001197
7736	0.001303
7737	0.001269
7738	0.001003
7739	0.000617
7740	0.000714
7741	0.000996
7742	0.000879
7743	0.000814
7744	0.000987
7745	0.001095
7746	0.001459
7747	0.001528
7748	0.001582
7749	0.001516
7750	0.001238
7751	0.001056
7752	0.001215
7753	0.001463
7754	0.001395
7755	0.001388
7756	0.001025
7757	0.001063
7758	0.001253
7759	0.001246
7760	0.001088
7761	0.001043
7762	0.000999
7763	0.001032
7764	0.00111
7765	0.00104
7766	0.001013
7767	0.00131
7768	0.001677
7769	0.002004
7770	0.002168
7771	0.002339
7772	0.002434
7773	0.002737
7774	0.002697
7775	0.002544
7776	0.00225
7777	0.001997
7778	0.002146
7779	0.002152
7780	0.002057
7781	0.002072
7782	0.002217
7783	0.002469
7784	0.002859
7785	0.003003
7786	0.002818
7787	0.002611
7788	0.002421
7789	0.002462
7790	0.002503
7791	0.002807
7792	0.002804
7793	0.002872
7794	0.002681
7795	0.002309
7796	0.00211
7797	0.002429
7798	0.002617
7799	0.002794
7800	0.002936
7801	0.002994
7802	0.002881
7803	0.002629
7804	0.002561
7805	0.002868
7806	0.002935
7807	0.002868
7808	0.002648
7809	0.002448
7810	0.002696
7811	0.002751
7812	0.002585
7813	0.002222
7814	0.002215
7815	0.002202
7816	0.002512
7817	0.002601
7818	0.002443
7819	0.002205
7820	0.002413
7821	0.002848
7822	0.003131
7823	0.002915
7824	0.0029
7825	0.002866
7826	0.00289
7827	0.00314
7828	0.00345
7829	0.003359
7830	0.003023
7831	0.003162
7832	0.003705
7833	0.00358
7834	0.003307
7835	0.003088
7836	0.003102
7837	0.003557
7838	0.003434
7839	0.00329
7840	0.00316
7841	0.003174
7842	0.003501
7843	0.00358
7844	0.003706
7845	0.00335
7846	0.00328
7847	0.003449
7848	0.003588
7849	0.003411
7850	0.003574
7851	0.00368
7852	0.003765
7853	0.003485
7854	0.003509
7855	0.003595
7856	0.003485
7857	0.003656
7858	0.003801
7859	0.003664
7860	0.00344
7861	0.003319
7862	0.003607
7863	0.003591
7864	0.003327
7865	0.003464
7866	0.003537
7867	0.003372
7868	0.003062
7869	0.00329
7870	0.003361
7871	0.003337
7872	0.003455
7873	0.003076
7874	0.002529
7875	0.00187
7876	0.001982
7877	0.001927
7878	0.002025
7879	0.002199
7880	0.002138
7881	0.001907
7882	0.001683
7883	0.001949
7884	0.002257
7885	0.002257
7886	0.002001
7887	0.001941
7888	0.002035
7889	0.002017
7890	0.001903
7891	0.001786
7892	0.001965
7893	0.001906
7894	0.002115
7895	0.001759
7896	0.001715
7897	0.001953
7898	0.001935
7899	0.002088
7900	0.002303
7901	0.002179
7902	0.001861
7903	0.001875
7904	0.001847
7905	0.001696
7906	0.001548
7907	0.001579
7908	0.001696
7909	0.001836
7910	0.001914
7911	0.001634
7912	0.001474
7913	0.001428
7914	0.001441
7915	0.001467
7916	0.001706
7917	0.001843
7918	0.001782
7919	0.001607
7920	0.001344
7921	0.001288
7922	0.001283
7923	0.001242
7924	0.00127
7925	0.001455
7926	0.001524
7927	0.001581
7928	0.00169
7929	0.001431
7930	0.001361
7931	0.001402
7932	0.001504
7933	0.00151
7934	0.001529
7935	0.001411
7936	0.001675
7937	0.001843
7938	0.002117
7939	0.00174
7940	0.001611
7941	0.001532
7942	0.001352
7943	0.001364
7944	0.001459
7945	0.001556
7946	0.001902
7947	0.001631
7948	0.001418
7949	0.001551
7950	0.001815
7951	0.001893
7952	0.002073
7953	0.002034
7954	0.001777
7955	0.001596
7956	0.001767
7957	0.001617
7958	0.001547
7959	0.001574
7960	0.001625
7961	0.001396
7962	0.001204
7963	0.001001
7964	0.001118
7965	0.001405
7966	0.001335
7967	0.001296
7968	0.001113
7969	0.001193
7970	0.001507
7971	0.001606
7972	0.001286
7973	0.001217
7974	0.001514
7975	0.001859
7976	0.002335
7977	0.001934
7978	0.001211
7979	0.001014
7980	0.001153
7981	0.001436
7982	0.001313
7983	0.001347
7984	0.00141
7985	0.001272
7986	0.001126
7987	0.000744
7988	0.000426
7989	0.000665
7990	0.001165
7991	0.001424
7992	0.001705
7993	0.001511
7994	0.001327
7995	0.001243
7996	0.001196
7997	0.001019
7998	0.001064
[truncated: 3,401 more rows]

## Sheet: N359dC 0.45 M
Time	UV
6000	0.00467
6001	0.004912
6002	0.005267
6003	0.005233
6004	0.005263
6005	0.005264
6006	0.005224
6007	0.005166
6008	0.004967
6009	0.005002
6010	0.004785
6011	0.004845
6012	0.005459
6013	0.005442
6014	0.004916
6015	0.005221
6016	0.005525
6017	0.005065
6018	0.004975
6019	0.005618
6020	0.005731
6021	0.005394
6022	0.005172
6023	0.005239
6024	0.005216
6025	0.005055
6026	0.004869
6027	0.004922
6028	0.005124
6029	0.00537
6030	0.005205
6031	0.004864
6032	0.005025
6033	0.005144
6034	0.005144
6035	0.005338
6036	0.005557
6037	0.005208
6038	0.004631
6039	0.004661
6040	0.005005
6041	0.004974
6042	0.005182
6043	0.005512
6044	0.005612
6045	0.005204
6046	0.005359
6047	0.005792
6048	0.005726
6049	0.005733
6050	0.005685
6051	0.005342
6052	0.004966
6053	0.005081
6054	0.005163
6055	0.005316
6056	0.005559
6057	0.005489
6058	0.005486
6059	0.00546
6060	0.005367
6061	0.005184
6062	0.00516
6063	0.005143
6064	0.00534
6065	0.005395
6066	0.005573
6067	0.005987
6068	0.006036
6069	0.006134
6070	0.006029
6071	0.005909
6072	0.005922
6073	0.005935
6074	0.005875
6075	0.006012
6076	0.006079
6077	0.00617
6078	0.005961
6079	0.005697
6080	0.005531
6081	0.005714
6082	0.006107
6083	0.006059
6084	0.006155
6085	0.006161
6086	0.006207
6087	0.00642
6088	0.006245
6089	0.006362
6090	0.006557
6091	0.006109
6092	0.006015
6093	0.005957
6094	0.005701
6095	0.005643
6096	0.005845
6097	0.005992
6098	0.005709
6099	0.005345
6100	0.005517
6101	0.005827
6102	0.005933
6103	0.005903
6104	0.005437
6105	0.005204
6106	0.005183
6107	0.005388
6108	0.005866
6109	0.006222
6110	0.006281
6111	0.00611
6112	0.005827
6113	0.005715
6114	0.00565
6115	0.005661
6116	0.005565
6117	0.005518
6118	0.005322
6119	0.005469
6120	0.00568
6121	0.005781
6122	0.005885
6123	0.006199
6124	0.005648
6125	0.005267
6126	0.005449
6127	0.005471
6128	0.005091
6129	0.005012
6130	0.005303
6131	0.005425
6132	0.005185
6133	0.004696
6134	0.004657
6135	0.004963
6136	0.005063
6137	0.005186
6138	0.004951
6139	0.004636
6140	0.004645
6141	0.004707
6142	0.00484
6143	0.005155
6144	0.005441
6145	0.005471
6146	0.005366
6147	0.005344
6148	0.005354
6149	0.005383
6150	0.005767
6151	0.005944
6152	0.005905
6153	0.006237
6154	0.00613
6155	0.006036
6156	0.005906
6157	0.005415
6158	0.005163
6159	0.005351
6160	0.00542
6161	0.005301
6162	0.005358
6163	0.005457
6164	0.005435
6165	0.005663
6166	0.005604
6167	0.005657
6168	0.005468
6169	0.005289
6170	0.00516
6171	0.005393
6172	0.00558
6173	0.005675
6174	0.005673
6175	0.005591
6176	0.006165
6177	0.006365
6178	0.006321
6179	0.005919
6180	0.005731
6181	0.005781
6182	0.005865
6183	0.00585
6184	0.006218
6185	0.006095
6186	0.005936
6187	0.006239
6188	0.006609
6189	0.006225
6190	0.005858
6191	0.00576
6192	0.00595
6193	0.005929
6194	0.005996
6195	0.005699
6196	0.005804
6197	0.006235
6198	0.006423
6199	0.006516
6200	0.006276
6201	0.006045
6202	0.00598
6203	0.00613
6204	0.006233
6205	0.006241
6206	0.006197
6207	0.006194
6208	0.006333
6209	0.006461
6210	0.006352
6211	0.006505
6212	0.006305
6213	0.006194
6214	0.006228
6215	0.006475
6216	0.006503
6217	0.006312
6218	0.006326
6219	0.006524
6220	0.00664
6221	0.00656
6222	0.006632
6223	0.006734
6224	0.006496
6225	0.006335
6226	0.006422
6227	0.006469
6228	0.006475
6229	0.006557
6230	0.006329
6231	0.006183
6232	0.006144
6233	0.006384
6234	0.00617
6235	0.005881
6236	0.006133
6237	0.006049
6238	0
6239	7.3e-05
6240	0.00067
6241	0.001158
6242	0.001267
6243	0.001091
6244	0.000724
6245	0.00081
6246	0.000987
6247	0.000861
6248	0.000773
6249	0.000561
6250	0.000869
6251	0.00097
6252	0.000571
6253	0.00052
6254	0.000362
6255	0.00011
6256	0.00017
6257	0.000125
6258	0.000194
6259	5.3e-05
6260	-0.000139
6261	2.2e-05
6262	0.000339
6263	0.000131
6264	0.000112
6265	0.000329
6266	0.000491
6267	0.000204
6268	0.000104
6269	0.000115
6270	6e-06
6271	-2.5e-05
6272	-3.9e-05
6273	-2.6e-05
6274	0.000106
6275	-4.3e-05
6276	-0.000255
6277	-0.000221
6278	0.000272
6279	0.000468
6280	0.000168
6281	0.000204
6282	2.8e-05
6283	7.3e-05
6284	0.000408
6285	0.000285
6286	-0.000402
6287	-0.0007
6288	-0.000233
6289	-0.00011
6290	-0.000323
6291	-0.000794
6292	-0.000905
6293	-0.000916
6294	-0.000272
6295	-0.000254
6296	-0.000476
6297	-0.000521
6298	-0.000103
6299	0.000106
6300	0.00045
6301	0.000517
6302	0.000431
6303	3.5e-05
6304	-0.000183
6305	4.1e-05
6306	-5e-06
6307	0.000104
6308	-0.000162
6309	-1.4e-05
6310	-2e-05
6311	-6.9e-05
6312	4.8e-05
6313	0.000162
6314	0.000277
6315	0.000192
6316	0.000169
6317	8e-06
6318	-0.00012
6319	0.000212
6320	0.000461
6321	0.000217
6322	-0.000455
6323	-0.000242
6324	7.2e-05
6325	-4.1e-05
6326	-4.2e-05
6327	-6.3e-05
6328	2.9e-05
6329	0.000187
6330	0.000373
6331	0.000836
6332	0.001029
6333	0.001323
6334	0.001562
6335	0.001557
6336	0.001637
6337	0.001669
6338	0.001886
6339	0.001832
6340	0.001867
6341	0.001677
6342	0.001703
6343	0.001876
6344	0.001857
6345	0.001575
6346	0.001597
6347	0.001941
6348	0.002318
6349	0.002675
6350	0.002862
6351	0.0026
6352	0.002142
6353	0.002238
6354	0.002411
6355	0.002559
6356	0.002564
6357	0.00252
6358	0.002411
6359	0.002369
6360	0.002577
6361	0.002724
6362	0.002511
6363	0.002235
6364	0.002175
6365	0.002443
6366	0.002796
6367	0.002743
6368	0.002579
6369	0.002868
6370	0.00302
6371	0.002833
6372	0.00248
6373	0.002081
6374	0.002288
6375	0.002117
6376	0.001797
6377	0.001789
6378	0.001966
6379	0.002213
6380	0.002026
6381	0.001828
6382	0.001951
6383	0.002012
6384	0.002348
6385	0.002265
6386	0.002101
6387	0.002109
6388	0.002122
6389	0.002257
6390	0.002621
6391	0.002779
6392	0.002522
6393	0.002248
6394	0.002125
6395	0.001934
6396	0.001599
6397	0.001537
6398	0.001679
6399	0.001808
6400	0.001993
6401	0.002201
6402	0.002423
6403	0.002373
6404	0.001576
6405	0.001165
6406	0.001448
6407	0.001901
6408	0.002249
6409	0.002146
6410	0.002627
6411	0.00267
6412	0.002238
6413	0.002009
6414	0.001623
6415	0.001157
6416	0.001236
6417	0.001523
6418	0.001378
6419	0.001423
6420	0.001477
6421	0.001907
6422	0.002283
6423	0.002176
6424	0.001143
6425	0.000591
6426	0.000651
6427	0.000864
6428	0.000519
6429	0.00017
6430	0.000734
6431	0.001015
6432	0.001259
6433	0.00136
6434	0.001148
6435	0.000852
6436	0.00118
6437	0.001787
6438	0.001872
6439	0.001882
6440	0.001479
6441	0.001409
6442	0.001281
6443	0.00067
6444	0.000115
6445	-0.000275
6446	-0.000344
6447	6.9e-05
6448	0.000423
6449	0.000301
6450	-0.000121
6451	-0.000441
6452	0.000104
6453	0.000758
6454	0.000903
6455	0.000532
6456	0.000185
6457	-5.5e-05
6458	-0.000244
6459	-0.000255
6460	-0.000302
6461	-0.000483
6462	-0.000414
6463	-0.000429
6464	9e-06
6465	5.6e-05
6466	-6.1e-05
6467	-0.000341
6468	-0.00017
6469	-0.000128
6470	-0.000448
6471	-0.000561
6472	-0.000418
6473	-0.000557
6474	-0.000712
6475	-0.000517
6476	-0.000314
6477	-0.000741
6478	-0.001035
6479	-0.001082
6480	-0.000599
6481	-4.7e-05
6482	6.7e-05
6483	-0.000337
6484	-0.000449
6485	-0.000834
6486	-0.000836
6487	-0.000658
6488	-0.000587
6489	-0.000967
6490	-0.000846
6491	-0.000293
6492	-0.000185
6493	-0.000657
6494	-0.001124
6495	-0.000858
6496	-0.000591
6497	-0.000217
6498	0.000229
6499	3e-05
6500	-0.000201
6501	-0.000115
6502	-0.000181
6503	-0.000569
6504	-0.000545
6505	-0.000464
6506	-0.000438
6507	-0.00052
6508	-0.000446
6509	-0.00049
6510	-0.0005
6511	-2.8e-05
6512	0.000146
6513	0.000445
6514	0.000507
6515	0.000469
6516	0.000338
6517	0.000645
6518	0.00051
6519	0.000428
6520	-0.000102
6521	-0.000354
6522	-0.000695
6523	-0.000659
6524	-0.000407
6525	-0.000101
6526	-0.000168
6527	-0.000329
6528	-0.000141
6529	-3.3e-05
6530	-0.000242
6531	-0.000383
6532	-0.000541
6533	-0.000616
6534	-0.000371
6535	-0.000266
6536	-0.000571
6537	-0.000749
6538	-0.000921
6539	-0.000755
6540	-0.0006
6541	-0.00025
6542	-0.000228
6543	-0.000255
6544	-1.3e-05
6545	8.1e-05
6546	4e-05
6547	4.3e-05
6548	-6.8e-05
6549	-1.9e-05
6550	0.000372
6551	0.000405
6552	0.000239
6553	0.00025
6554	0.000506
6555	0.000574
6556	0.000459
6557	9.2e-05
6558	-2e-05
6559	0.000122
6560	0.000897
6561	0.001223
6562	0.000736
6563	3.8e-05
6564	-0.000164
6565	0.000155
6566	0.000346
6567	0.000568
6568	0.000398
6569	-3.6e-05
6570	-0.000371
6571	-0.000124
6572	0.000305
6573	0.000385
6574	0.000446
6575	0.000467
6576	0.00041
6577	0.000198
6578	-9.7e-05
6579	0.000246
6580	0.000367
6581	0.0003
6582	0.000473
6583	0.000586
6584	0.000143
6585	0.00027
6586	0.000175
6587	0.000211
6588	4e-06
6589	-7e-06
6590	0.000159
6591	0.000231
6592	0.000331
6593	0.000457
6594	0.000513
6595	-9e-06
6596	-0.000549
6597	-0.000414
6598	8.9e-05
6599	0.000248
6600	0.00049
6601	0.000372
6602	-0.000134
6603	-0.000508
6604	-0.000279
6605	-0.000267
6606	-0.000493
6607	-8.8e-05
6608	0.000214
6609	-4.4e-05
6610	-0.000537
6611	-0.000661
6612	-0.000616
6613	-0.000554
6614	-0.000511
6615	-0.000251
6616	-0.000226
6617	-0.000375
6618	-0.000218
6619	-1.5e-05
6620	-0.000263
6621	-0.000565
6622	-0.000933
6623	-0.000836
6624	-0.000603
6625	-0.00041
6626	-0.000742
6627	-0.000906
6628	-0.00099
6629	-0.00108
6630	-0.000913
6631	-0.00061
6632	-0.000372
6633	-0.000857
6634	-0.000875
6635	-0.000585
6636	-0.000343
6637	-0.000613
6638	-0.000882
6639	-0.00097
6640	-0.000726
6641	-0.000518
6642	-0.000479
6643	-0.000537
6644	-0.000684
6645	-0.000566
6646	-0.000125
6647	-0.000344
6648	-0.000598
6649	-0.000872
6650	-0.000426
6651	-0.000599
6652	-0.00031
6653	-0.000428
6654	-0.000797
6655	-0.000868
6656	-0.000795
6657	-0.000368
6658	-0.000149
6659	-0.000385
6660	-0.000641
6661	-0.000538
6662	-0.000165
6663	-7e-06
6664	-0.000379
6665	-0.000719
6666	-0.000622
6667	-0.000283
6668	8.7e-05
6669	3e-05
6670	0.000165
6671	0.000677
6672	0.00065
6673	0.000294
6674	0.000305
6675	0.000585
6676	0.000661
6677	0.000749
6678	0.000936
6679	0.000679
6680	0.000325
6681	0.000203
6682	0.000449
6683	0.000383
6684	0.00025
6685	-0.000146
6686	0.000157
6687	0.000231
6688	-7.8e-05
6689	4.4e-05
6690	-8.9e-05
6691	-0.000705
6692	-0.000765
6693	-0.000337
6694	-0.000232
6695	5.5e-05
6696	7e-06
6697	-1.9e-05
6698	5.5e-05
6699	0.000131
6700	0.00061
6701	0.0005
6702	0.000376
6703	9e-05
6704	0.0002
6705	0.000546
6706	0.001081
6707	0.001081
6708	0.000793
6709	0.000404
6710	0.000312
6711	0.000621
6712	0.000721
6713	0.000578
6714	0.000477
6715	0.000569
6716	0.000776
6717	0.000548
6718	0.000367
6719	0.000476
6720	0.000864
6721	0.001444
6722	0.001768
6723	0.001641
6724	0.000912
6725	0.000381
6726	5.3e-05
6727	2.7e-05
6728	4.5e-05
6729	0.000417
6730	0.000759
6731	0.000732
6732	0.000484
6733	0.000399
6734	0.00074
6735	0.000534
6736	0.000641
6737	0.000714
6738	0.000789
6739	0.000264
6740	0.000247
6741	0.000335
6742	0.000667
6743	0.000505
6744	0.000217
6745	0.000134
6746	0.000278
6747	0.000623
6748	0.000829
6749	0.0005
6750	0.000419
6751	0.000774
6752	0.000974
6753	0.001015
6754	0.000681
6755	0.000877
6756	0.000975
6757	0.000965
6758	0.000857
6759	0.000924
6760	0.000874
6761	0.000421
6762	0.000144
6763	0.000247
6764	0.000462
6765	0.000502
6766	0.000394
6767	0.000232
6768	0.000286
6769	0.000463
6770	6.5e-05
6771	-0.000182
6772	-2e-06
6773	0.000169
6774	0.00015
6775	0.000536
6776	0.001161
6777	0.001547
6778	0.001439
6779	0.001599
6780	0.001415
6781	0.001826
6782	0.001736
6783	0.00191
6784	0.002036
6785	0.001595
6786	0.001426
6787	0.001403
6788	0.001271
6789	0.00091
6790	0.000715
6791	0.000744
6792	0.000598
6793	0.000843
6794	0.001149
6795	0.001277
6796	0.000933
6797	0.00073
6798	0.000211
6799	0.000295
6800	0.000758
6801	0.00055
6802	0.000691
6803	0.000803
6804	0.000404
6805	8.7e-05
6806	0.000267
6807	0.000662
6808	0.000975
6809	0.001235
6810	0.001024
6811	0.000894
6812	0.000786
6813	0.001011
6814	0.001082
6815	0.001214
6816	0.001515
6817	0.001218
6818	0.000769
6819	0.000498
6820	0.000653
6821	0.000853
6822	0.000566
6823	0.000272
6824	0.000376
6825	0.00029
6826	0.000181
6827	-0.000122
6828	0.000273
6829	0.000195
6830	1.6e-05
6831	-0.000173
6832	0.000231
6833	0.000552
6834	0.000202
6835	-0.000313
6836	-0.000403
6837	8.3e-05
6838	0.000584
6839	0.000614
6840	0.000291
6841	8.6e-05
6842	0.00024
6843	0.000317
6844	5.5e-05
6845	-0.000103
6846	-7.6e-05
6847	1.7e-05
6848	0.00026
6849	0.000185
6850	8.9e-05
6851	-0.000371
6852	-0.00067
6853	-0.000514
6854	-0.000649
6855	-0.000825
6856	-0.001083
6857	-0.000745
6858	-0.000406
6859	-0.00066
6860	-0.00071
6861	-0.000547
6862	-0.000322
6863	0.000193
6864	0.000356
6865	0.000161
6866	4.3e-05
6867	0.00016
6868	6e-05
6869	0.000187
6870	0.000598
6871	0.000772
6872	0.000775
6873	0.000601
6874	0.000445
6875	0.000256
6876	2.9e-05
6877	-0.000219
6878	-0.000207
6879	-0.000112
6880	0.000232
6881	0.000236
6882	2.6e-05
6883	-5.7e-05
6884	0.000119
6885	2.5e-05
6886	-0.000291
6887	-0.000456
6888	-0.000564
6889	-0.00044
6890	-0.00046
6891	-0.00038
6892	-0.000218
6893	-7.6e-05
6894	-0.000504
6895	-0.001053
6896	-0.00127
6897	-0.001022
6898	-0.001047
6899	-0.001116
6900	-0.000927
6901	-0.000848
6902	-0.000817
6903	-0.000789
6904	-0.000894
6905	-0.000929
6906	-0.000753
6907	-0.000283
6908	-0.000359
6909	-0.000282
6910	-1.8e-05
6911	-0.000288
6912	-0.000433
6913	-0.000327
6914	3.2e-05
6915	-0.000477
6916	-0.000737
6917	-0.000432
6918	-0.000715
6919	-0.00113
6920	-0.001304
6921	-0.001364
6922	-0.000947
6923	-0.000405
6924	-0.000226
6925	-0.000639
6926	-0.000946
6927	-0.000947
6928	-0.000852
6929	-0.000575
6930	-0.00051
6931	-0.000748
6932	-0.001016
6933	-0.000724
6934	-0.000764
6935	-0.001081
6936	-0.001173
6937	-0.000979
6938	-0.000606
6939	-0.000411
6940	-0.000383
6941	-0.000621
6942	-0.000368
6943	-0.000416
6944	-0.000567
6945	-0.000404
6946	-0.000226
6947	-0.000169
6948	-3.6e-05
6949	-4.9e-05
6950	-0.000402
6951	-0.000335
6952	-0.000287
6953	-0.000517
6954	-0.000753
6955	-0.000937
6956	-0.000642
6957	-0.000364
6958	-0.000555
6959	-0.000735
6960	-0.000424
6961	-0.000496
6962	-0.000883
6963	-0.001228
6964	-0.001478
6965	-0.001389
6966	-0.001403
6967	-0.001298
6968	-0.001304
6969	-0.001092
6970	-0.000852
6971	-0.000695
6972	-0.00122
6973	-0.001355
6974	-0.001348
6975	-0.001268
6976	-0.001058
6977	-0.000839
6978	-0.000743
6979	-0.000979
6980	-0.001368
6981	-0.001184
6982	-0.000784
6983	-0.000666
6984	-0.000644
6985	-0.000676
6986	-0.000797
6987	-0.000975
6988	-0.000946
6989	-0.000694
6990	-0.000599
6991	-0.000707
6992	-0.000539
6993	-0.000356
6994	-0.000239
6995	-0.000343
6996	-0.000167
6997	-7.9e-05
6998	2.2e-05
6999	0.000114
7000	0.000237
7001	0.000402
7002	0.000382
7003	-0.000149
7004	-0.000234
7005	-8.4e-05
7006	9.4e-05
7007	-0.000119
7008	-0.000271
7009	-0.000552
7010	-0.00072
7011	-0.000688
7012	-0.000653
7013	-0.000287
7014	1.4e-05
7015	-0.000188
7016	-0.000948
7017	-0.000881
7018	-0.000669
7019	-0.000407
7020	-0.000345
7021	-0.000188
7022	-6.5e-05
7023	6.2e-05
7024	0.000154
7025	0.000167
7026	-6.2e-05
7027	-7.7e-05
7028	-0.000346
7029	-4.2e-05
7030	-7.6e-05
7031	-0.000149
7032	-0.000182
7033	-0.000268
7034	-0.000326
7035	-0.000392
7036	-0.000502
7037	-0.000643
7038	-0.000596
7039	-0.000739
7040	-0.000511
7041	-0.000719
7042	-0.000586
7043	-0.000716
7044	-0.00056
7045	-0.000373
7046	-0.000375
7047	-0.000514
7048	-0.000295
7049	-0.000159
7050	-0.000268
7051	-0.000461
7052	-0.000342
7053	-0.000333
7054	-0.000292
7055	-0.000388
7056	-0.000525
7057	-0.000624
7058	-0.000291
7059	-0.000131
7060	-0.000441
7061	-0.000606
7062	-0.000524
7063	-0.001142
7064	-0.001091
7065	-0.000547
7066	9.2e-05
7067	-1.3e-05
7068	-0.000247
7069	-0.000615
7070	-0.000754
7071	-0.000559
7072	-0.000512
7073	-0.000713
7074	-0.000973
7075	-0.000983
7076	-0.000711
7077	-0.000423
7078	-0.000201
7079	-0.000234
7080	-0.000287
7081	-0.000449
7082	-0.000582
7083	-0.000585
7084	-0.000477
7085	-0.000595
7086	-0.000804
7087	-0.000779
7088	-0.000488
7089	-0.000993
7090	-0.001558
7091	-0.001642
7092	-0.001191
7093	-0.000778
7094	-0.000702
7095	-0.000717
7096	-0.001025
7097	-0.001003
7098	-0.000855
7099	-0.000945
7100	-0.001177
7101	-0.001446
7102	-0.001763
7103	-0.001607
7104	-0.001536
7105	-0.001777
7106	-0.00217
7107	-0.001927
7108	-0.001363
7109	-0.000797
7110	-0.000977
7111	-0.001135
7112	-0.001318
7113	-0.001501
7114	-0.00174
7115	-0.001842
7116	-0.001584
7117	-0.001335
7118	-0.001554
7119	-0.001751
7120	-0.001227
7121	-0.000757
7122	-0.000847
7123	-0.001257
7124	-0.001275
7125	-0.00091
7126	-0.00037
7127	-0.000419
7128	-0.000531
7129	-0.000491
7130	-0.000442
7131	-0.000159
7132	7.3e-05
7133	0.000628
7134	0.000962
7135	0.00075
7136	7.5e-05
7137	0.000101
7138	0.000443
7139	0.000395
7140	0.000282
7141	0.000537
7142	0.000741
7143	0.000802
7144	0.000892
7145	0.000593
7146	7e-05
7147	-0.000267
7148	-0.000399
7149	-0.000402
7150	-0.000355
7151	-0.00019
7152	-0.000305
7153	-0.000341
7154	-0.000503
7155	-0.000449
7156	-0.000715
7157	-0.000802
7158	-0.000751
7159	-0.000723
7160	-0.000671
7161	-0.000663
7162	-0.000566
7163	-0.000248
7164	0.000175
7165	9.7e-05
7166	0.000137
7167	0.000186
7168	0.000259
7169	0.000114
7170	-4.3e-05
7171	-0.000121
7172	4.2e-05
7173	-8.8e-05
7174	-0.000208
7175	-0.000106
7176	2.6e-05
7177	0.000142
7178	0.000537
7179	0.000493
7180	0.000123
7181	-0.000293
7182	-0.000368
7183	-0.000602
7184	-0.000518
7185	-0.000363
7186	-0.000553
7187	-0.000691
7188	-0.000798
7189	-0.000658
7190	-0.000677
7191	-0.000279
7192	-0.000127
7193	-1.3e-05
7194	-9.3e-05
7195	2e-06
7196	0.000147
7197	0.000376
7198	0.000606
7199	0.001055
7200	0.000878
7201	0.000192
7202	0.000196
7203	0.000385
7204	0.000368
7205	0.000538
7206	0.000385
7207	-2.1e-05
7208	9.2e-05
7209	0.000153
7210	-0.00022
7211	-0.000608
7212	-0.001093
7213	-0.000894
7214	-0.000353
7215	-5.3e-05
7216	2.5e-05
7217	4.4e-05
7218	4.8e-05
7219	0.000528
7220	0.000764
7221	0.000834
7222	0.001106
7223	0.001245
7224	0.000401
7225	-0.000202
7226	0.00011
7227	0.000643
7228	0.000719
7229	0.000694
7230	0.000783
7231	0.001224
7232	0.001536
7233	0.001947
7234	0.001854
7235	0.001329
7236	0.000948
7237	0.0009
7238	0.001058
7239	0.001343
7240	0.001407
7241	0.001645
7242	0.00151
7243	0.001167
7244	0.00119
7245	0.001318
7246	0.001571
7247	0.001675
7248	0.001726
7249	0.001714
7250	0.001573
7251	0.001528
7252	0.001814
7253	0.002073
7254	0.002125
7255	0.002095
7256	0.002296
7257	0.002415
7258	0.002548
7259	0.002222
7260	0.002371
7261	0.002333
7262	0.002505
7263	0.002371
7264	0.002387
7265	0.002733
7266	0.002437
7267	0.001595
7268	0.001587
7269	0.00191
7270	0.001975
7271	0.002159
7272	0.002232
7273	0.002179
7274	0.002524
7275	0.002529
7276	0.002452
7277	0.002097
7278	0.00169
7279	0.001708
7280	0.001743
7281	0.001959
7282	0.002632
7283	0.002466
7284	0.001641
7285	0.001255
7286	0.00117
7287	0.00068
7288	-0.000231
7289	-0.00067
7290	-0.000594
7291	-0.000118
7292	0.000355
7293	0.000305
7294	-5e-05
7295	0.000176
7296	0.000349
7297	9.9e-05
7298	0.0002
7299	0.000679
7300	0.000906
7301	0.000345
7302	3.3e-05
7303	-4.4e-05
7304	-0.000145
7305	4.7e-05
7306	0.000136
7307	-4.9e-05
7308	-0.000118
7309	-0.000329
7310	-0.000443
7311	-5.3e-05
7312	-5e-05
7313	-0.000335
7314	-0.000259
7315	-0.000389
7316	-0.000366
7317	-0.000355
7318	-0.000205
7319	-0.000529
7320	-0.000658
7321	-0.000856
7322	-0.000779
7323	-0.000645
7324	-0.000359
7325	-0.000308
7326	-0.000226
7327	0.000261
7328	0.000475
7329	0.000578
7330	0.000129
7331	-9.6e-05
7332	-3.2e-05
7333	0.000137
7334	-6.3e-05
7335	-0.00024
7336	-0.00014
7337	-1e-05
7338	-4.3e-05
7339	0.000383
7340	0.000642
7341	0.00055
7342	-4.3e-05
7343	-5e-06
7344	-0.000198
7345	-0.000179
7346	-0.000195
7347	-0.000656
7348	-0.000667
7349	-0.00024
7350	-0.000291
7351	-0.000548
7352	-0.000683
7353	-0.000531
7354	-0.000597
7355	-0.000617
7356	-0.000803
7357	-0.000619
7358	-0.000454
7359	-0.000476
7360	-0.000476
7361	-0.00067
7362	-0.000657
7363	-0.000618
7364	-0.000428
7365	-0.000219
7366	-0.000525
7367	-0.000709
7368	-0.000797
7369	-0.000573
7370	-0.000113
7371	2.6e-05
7372	-0.000601
7373	-0.000652
7374	-0.000173
7375	-3.3e-05
7376	-0.000281
7377	-0.000473
7378	-0.000611
7379	-0.000732
7380	-0.00061
7381	-0.000358
7382	-0.000283
7383	-0.000159
7384	-0.000355
7385	-0.000306
7386	4.7e-05
7387	0.000207
7388	-2.4e-05
7389	-0.000283
7390	-0.000843
7391	-0.00098
7392	-0.000723
7393	-0.000489
7394	-0.000351
7395	-0.000636
7396	-0.000713
7397	-0.000256
7398	0.000185
7399	-9.1e-05
7400	-0.000672
7401	-0.000535
7402	-9e-06
7403	-0.000136
7404	-0.000669
7405	-0.000574
7406	-0.000362
7407	-0.000177
7408	-5.2e-05
7409	0.000201
7410	8.6e-05
7411	-0.000149
7412	-2.2e-05
7413	0.000312
7414	0.000395
7415	0.000239
7416	0.000125
7417	0.000407
7418	0.000402
7419	5.7e-05
7420	-0.000289
7421	-2.3e-05
7422	0.00027
7423	0.000194
7424	-0.000207
7425	-0.000424
7426	-0.000685
7427	-0.000381
7428	-2e-05
7429	0.00018
7430	0.000101
7431	0.000124
7432	0.0001
7433	-2.6e-05
7434	-2.6e-05
7435	-0.000141
7436	-6.6e-05
7437	-0.000338
7438	-0.00019
7439	0.000233
7440	0.000211
7441	0.000297
7442	0.000362
7443	0.000513
7444	0.000775
7445	0.000887
7446	0.000654
7447	0.000742
7448	0.000821
7449	0.000722
7450	0.00044
7451	0.000733
7452	0.001246
7453	0.001483
7454	0.001385
7455	0.000939
7456	0.000421
7457	0.000541
7458	0.000534
7459	0.000438
7460	0.000462
7461	0.000434
7462	0.000601
7463	0.000827
7464	0.001061
7465	0.000965
7466	0.000965
7467	0.001238
7468	0.000997
7469	0.000862
7470	0.001151
7471	0.001044
7472	0.000924
7473	0.000518
7474	5e-05
7475	7.4e-05
7476	0.000452
7477	0.001069
7478	0.001123
7479	0.000542
7480	0.000251
7481	0.000572
7482	0.000671
7483	0.00077
7484	0.000443
7485	0.000123
7486	0.000265
7487	0.000202
7488	0.000211
7489	0.000245
7490	-1e-06
7491	0.000179
7492	0.000315
7493	0.000312
7494	0.000432
7495	0.000916
7496	0.001153
7497	0.001381
7498	0.001693
7499	0.001002
7500	0.000658
7501	0.000505
7502	0.000657
7503	0.000838
7504	0.001258
7505	0.001298
7506	0.001117
7507	0.000905
7508	0.001136
7509	0.001377
7510	0.000941
7511	0.00094
7512	0.001236
7513	0.001166
7514	0.001271
7515	0.001103
7516	0.000787
7517	0.000636
7518	0.000524
7519	0.000492
7520	0.000749
7521	0.001087
7522	0.001177
7523	0.001327
7524	0.001546
7525	0.001533
7526	0.001611
7527	0.001556
7528	0.001516
7529	0.001345
7530	0.001483
7531	0.00126
7532	0.001453
7533	0.001705
7534	0.001525
7535	0.001492
7536	0.001381
7537	0.00154
7538	0.001427
7539	0.000981
7540	0.000987
7541	0.001457
7542	0.001451
7543	0.001299
7544	0.001009
7545	0.000953
7546	0.000928
7547	0.000933
7548	0.00105
7549	0.001297
7550	0.00117
7551	0.001178
7552	0.001064
7553	0.001145
7554	0.001104
7555	0.00133
7556	0.001121
7557	0.001009
7558	0.000849
7559	0.000886
7560	0.001052
7561	0.001157
7562	0.001272
7563	0.001498
7564	0.001323
7565	0.000753
7566	0.000866
7567	0.000913
7568	0.000605
7569	0.000516
7570	0.000968
7571	0.00119
7572	0.001081
7573	0.000956
7574	0.001172
7575	0.001375
7576	0.001236
7577	0.001002
7578	0.0012
7579	0.001324
7580	0.00134
7581	0.001478
7582	0.001557
7583	0.001183
7584	0.00085
7585	0.000881
7586	0.000933
7587	0.001097
7588	0.000939
7589	0.001036
7590	0.001538
7591	0.001531
7592	0.000977
7593	0.000863
7594	0.000992
7595	0.001014
7596	0.001108
7597	0.000794
7598	0.0005
7599	0.000416
7600	0.000237
7601	0.000247
7602	0.000272
7603	0.000443
7604	0.000556
7605	0.000431
7606	0.000123
7607	-0.000485
7608	-5.7e-05
7609	0.000346
7610	0.000509
7611	0.000346
7612	-0.000156
7613	-0.000495
7614	-0.000475
7615	-0.000137
7616	-9.5e-05
7617	-0.000405
7618	-0.0004
7619	-0.000374
7620	-0.000331
7621	3.5e-05
7622	0.000295
7623	9.3e-05
7624	0.000134
7625	0.000106
7626	-8e-05
7627	-0.000178
7628	-0.000307
7629	-0.000613
7630	-0.000665
7631	-0.000162
7632	-0.000162
7633	-0.000474
7634	-0.000614
7635	-0.000455
7636	0.000162
7637	3.1e-05
7638	-0.000372
7639	-0.000822
7640	-0.000894
7641	-0.000635
7642	-0.000287
7643	-0.000312
7644	-0.000428
7645	-0.000499
7646	-7.2e-05
7647	-0.000104
7648	-0.000299
7649	-0.00026
7650	-0.000325
7651	-0.000565
7652	-0.0003
7653	-2.6e-05
7654	-0.000236
7655	-0.000152
7656	0.000244
7657	0.000405
7658	0.000163
7659	-7.4e-05
7660	0.00021
7661	0.000136
7662	-0.000246
7663	-0.000508
7664	-0.00054
7665	-0.000113
7666	0.000331
7667	0.000664
7668	0.000467
7669	0.000396
7670	0.000294
7671	0.000269
7672	0.000249
7673	0.000432
7674	0.000395
7675	9.9e-05
7676	7.6e-05
7677	0.0001
7678	0.000181
7679	0.000538
7680	0.000634
7681	0.000325
7682	0.000252
7683	-5e-06
7684	6.5e-05
7685	0.000424
7686	0.000451
7687	9.4e-05
7688	-7.4e-05
7689	1.7e-05
7690	0.000581
7691	0.000388
7692	5.2e-05
7693	0.00016
7694	0.000101
7695	6.5e-05
7696	0.000226
7697	0.000376
7698	0.000433
7699	0.000437
7700	0.000189
7701	-0.000377
7702	-0.000129
7703	6.2e-05
7704	0.000315
7705	0.000251
7706	9.2e-05
7707	-0.000205
7708	4.5e-05
7709	0.000246
7710	0.000743
7711	0.0011
7712	0.000592
7713	0.000216
7714	4.7e-05
7715	0.000283
7716	0.000208
7717	0.000192
7718	-0.000411
7719	-4e-06
7720	0.000381
7721	0.000813
7722	0.000965
7723	0.000925
7724	0.000604
7725	0.000295
7726	0.000457
7727	0.000771
7728	0.00057
7729	0.000414
7730	0.000573
7731	0.000748
7732	0.000536
7733	0.000752
7734	0.000721
7735	0.000507
7736	0.000711
7737	0.00079
7738	0.000402
7739	2.8e-05
7740	0.000134
7741	0.000545
7742	0.000262
7743	-2.8e-05
7744	4.9e-05
7745	0.000227
7746	-1.7e-05
7747	-2.1e-05
7748	-0.000189
7749	-0.0003
7750	-0.000359
7751	6.9e-05
7752	0.000112
7753	0.000111
7754	0.000224
7755	0.00047
7756	0.000326
7757	0.000346
7758	0.000261
7759	0.00037
7760	0.000427
7761	0.000684
7762	0.001149
7763	0.001331
7764	0.001309
7765	0.000913
7766	0.000847
7767	0.000682
7768	0.000482
7769	0.000436
7770	7e-06
7771	-2.9e-05
7772	-5.6e-05
7773	9e-06
7774	4.3e-05
7775	0.000177
7776	0.000475
7777	0.000481
7778	0.000161
7779	0.000233
7780	0.000503
7781	0.000593
7782	0.00069
7783	0.00053
7784	-5.4e-05
7785	-8e-05
7786	0.000261
7787	7.4e-05
7788	-0.000354
7789	1.4e-05
7790	0.000374
7791	0.000456
7792	0.000361
7793	0.000187
7794	-5.1e-05
7795	-4.5e-05
7796	0.000158
7797	0.000203
7798	-0.000272
7799	-0.000653
7800	-0.000726
7801	-0.000366
7802	-3.9e-05
7803	0.000185
7804	0.000263
7805	0.000111
7806	0.000126
7807	0
7808	-0.000197
7809	-0.000357
7810	8.2e-05
7811	0.000441
7812	0.000623
7813	0.000225
7814	-0.000339
7815	-0.000508
7816	-0.000485
7817	0.000112
7818	0.000415
7819	5.1e-05
7820	-0.000232
7821	-0.000566
7822	-0.000591
7823	-0.000294
7824	0.00014
7825	0.000296
7826	2.6e-05
7827	-0.000337
7828	-0.00027
7829	-0.000221
7830	-0.000198
7831	-0.000297
7832	2.1e-05
7833	0.000273
7834	0.000409
7835	-0.000128
7836	-0.000383
7837	-0.00026
7838	-0.000352
7839	-0.000535
7840	-0.000412
7841	-0.000391
7842	-0.000291
7843	-0.000202
7844	-0.000154
7845	-3.5e-05
7846	-0.000292
7847	-0.000997
7848	-0.001128
7849	-0.000827
7850	-0.000439
7851	-0.000294
7852	-0.000384
7853	-0.00028
7854	-0.000145
7855	-0.000326
7856	-0.000445
7857	-0.000533
7858	-0.000501
7859	-0.000303
7860	-0.000652
7861	-0.000641
7862	-0.000602
7863	-0.000463
7864	-0.00025
7865	-0.000465
7866	-0.000674
7867	-0.000805
7868	-0.000416
7869	-0.000453
7870	-0.000307
7871	-0.00045
7872	-0.000348
7873	-0.000325
7874	2.9e-05
7875	-6.3e-05
7876	-4.5e-05
7877	0.000291
7878	0.000302
7879	6e-06
7880	-0.000132
7881	8.4e-05
7882	9.4e-05
7883	-0.000385
7884	-0.000757
7885	-0.000736
7886	-0.00053
7887	-0.000729
7888	-0.000941
7889	-0.000888
7890	-0.001147
7891	-0.001123
7892	-0.000707
7893	-0.000276
7894	2e-05
7895	-9.1e-05
7896	-0.000456
7897	-0.000541
7898	-0.000603
7899	-0.000697
7900	-0.000502
7901	0.000173
7902	-0.000279
7903	-0.000613
7904	-0.000643
7905	-0.000726
7906	-0.000496
7907	-0.000241
7908	-0.000238
7909	-0.0005
7910	-0.000761
7911	-0.00072
7912	-0.00053
7913	-0.000446
7914	-0.000583
7915	-0.000984
7916	-0.000998
7917	-0.000828
7918	-0.000329
7919	-0.000261
7920	-0.000437
7921	-0.000504
7922	-0.00048
7923	-0.000358
7924	-0.000209
7925	-0.000349
7926	-0.000422
7927	-0.000223
7928	0.00014
7929	0.000163
7930	-0.000166
7931	-0.000482
7932	-0.000854
7933	-0.000883
7934	-0.000466
7935	-0.000491
7936	-0.000574
7937	-0.000364
7938	-0.000275
7939	-0.000128
7940	0.000294
7941	0.000375
7942	-0.000137
7943	-0.000555
7944	-0.000411
7945	-0.000494
7946	-0.000666
7947	-0.000931
7948	-0.000822
7949	-0.000597
7950	-0.000525
7951	-0.000516
7952	1e-05
7953	0.000506
7954	0.000643
7955	-6.8e-05
7956	-0.00026
7957	-0.000306
7958	-0.000312
7959	-0.000639
7960	-0.000697
7961	-0.000413
7962	-0.000343
7963	-0.000618
7964	-0.000923
7965	-0.000973
7966	-0.000613
7967	-0.000494
7968	-0.000551
7969	-0.000596
7970	-0.00086
7971	-0.000989
7972	-0.00065
7973	-0.000529
7974	-0.00059
7975	-0.000967
7976	-0.001291
7977	-0.001204
7978	-0.001085
7979	-0.001239
7980	-0.001149
7981	-0.000546
7982	-0.000229
7983	-0.000461
7984	-0.000611
7985	-0.00064
7986	-0.000979
7987	-0.001028
7988	-0.00061
7989	-0.000356
7990	-0.000512
7991	-0.000759
7992	-0.000979
7993	-0.001108
7994	-0.001157
7995	-0.001212
7996	-0.001098
7997	-0.00099
7998	-0.000806
[truncated: 3,401 more rows]

## Sheet: N359dC 0.15 M
Time	UV
6000	-0.00183
6001	-0.00137
6002	-0.00125
6003	-0.001586
6004	-0.001302
6005	-0.001271
6006	-0.00116
6007	-0.001433
6008	-0.001802
6009	-0.002259
6010	-0.002131
6011	-0.001851
6012	-0.001715
6013	-0.002011
6014	-0.001964
6015	-0.00194
6016	-0.001869
6017	-0.001749
6018	-0.001899
6019	-0.002132
6020	-0.001892
6021	-0.001332
6022	-0.001295
6023	-0.001494
6024	-0.001046
6025	-0.001176
6026	-0.000967
6027	-0.000871
6028	-0.000991
6029	-0.001361
6030	-0.001368
6031	-0.001287
6032	-0.001253
6033	-0.001173
6034	-0.001138
6035	-0.001311
6036	-0.001166
6037	-0.001179
6038	-0.001707
6039	-0.002435
6040	-0.002553
6041	-0.002408
6042	-0.002218
6043	-0.002246
6044	-0.002396
6045	-0.002736
6046	-0.002717
6047	-0.002588
6048	-0.002233
6049	-0.002317
6050	-0.002195
6051	-0.002079
6052	-0.002041
6053	-0.00211
6054	-0.002235
6055	-0.002237
6056	-0.001938
6057	-0.001805
6058	-0.001975
6059	-0.001854
6060	-0.001801
6061	-0.001761
6062	-0.001891
6063	-0.001847
6064	-0.001905
6065	-0.001812
6066	-0.001897
6067	-0.00178
6068	-0.001897
6069	-0.002054
6070	-0.001963
6071	-0.001637
6072	-0.00166
6073	-0.001768
6074	-0.001924
6075	-0.00199
6076	-0.001816
6077	-0.002015
6078	-0.001874
6079	-0.001592
6080	-0.001319
6081	-0.001602
6082	-0.001801
6083	-0.001965
6084	-0.00171
6085	-0.001272
6086	-0.001271
6087	-0.001262
6088	-0.001391
6089	-0.001778
6090	-0.001766
6091	-0.001823
6092	-0.001792
6093	-0.001901
6094	-0.001917
6095	-0.001735
6096	-0.001714
6097	-0.001788
6098	-0.001573
6099	-0.001375
6100	-0.001209
6101	-0.001143
6102	-0.001106
6103	-0.000886
6104	-0.000778
6105	-0.000895
6106	-0.001057
6107	-0.001043
6108	-0.001044
6109	-0.001356
6110	-0.001526
6111	-0.001557
6112	-0.001175
6113	-0.001013
6114	-0.001138
6115	-0.001343
6116	-0.00136
6117	-0.001513
6118	-0.001734
6119	-0.001681
6120	-0.001598
6121	-0.001679
6122	-0.001686
6123	-0.001714
6124	-0.001701
6125	-0.001789
6126	-0.002027
6127	-0.002113
6128	-0.001979
6129	-0.002087
6130	-0.002541
6131	-0.002636
6132	-0.002306
6133	-0.001883
6134	-0.001661
6135	-0.001772
6136	-0.001964
6137	-0.002231
6138	-0.002053
6139	-0.001588
6140	-0.001331
6141	-0.001154
6142	-0.001659
6143	-0.00201
6144	-0.001801
6145	-0.001683
6146	-0.001621
6147	-0.001835
6148	-0.001939
6149	-0.002179
6150	-0.002333
6151	-0.002358
6152	-0.002396
6153	-0.002425
6154	-0.002317
6155	-0.002052
6156	-0.002146
6157	-0.002214
6158	-0.002291
6159	-0.002379
6160	-0.002233
6161	-0.002079
6162	-0.002233
6163	-0.002635
6164	-0.002725
6165	-0.002717
6166	-0.002925
6167	-0.002592
6168	-0.002256
6169	-0.002034
6170	-0.001714
6171	-0.001302
6172	-0.001177
6173	-0.001656
6174	-0.001878
6175	-0.001646
6176	-0.001362
6177	-0.001037
6178	-0.000964
6179	-0.001066
6180	-0.001246
6181	-0.001214
6182	-0.001692
6183	-0.00192
6184	-0.001909
6185	-0.001792
6186	-0.001626
6187	-0.001465
6188	-0.001197
6189	-0.001062
6190	-0.00096
6191	-0.001002
6192	-0.00104
6193	-0.000937
6194	-0.000874
6195	-0.000848
6196	-0.000756
6197	-0.000781
6198	-0.000403
6199	-0.000534
6200	-0.00071
6201	-0.000664
6202	-0.000499
6203	-0.000513
6204	-0.000718
6205	-0.000686
6206	-0.001053
6207	-0.001252
6208	-0.001303
6209	-0.001045
6210	-0.00106
6211	-0.000924
6212	-0.000567
6213	-0.000586
6214	-0.000689
6215	-0.000829
6216	-0.000802
6217	-0.000452
6218	-0.000175
6219	0.000151
6220	-2.8e-05
6221	1.4e-05
6222	-0.000117
6223	-0.000469
6224	-0.001143
6225	-0.001203
6226	-0.00091
6227	-0.000752
6228	-0.000678
6229	-0.000144
6230	5e-05
6231	-0.000384
6232	-0.000865
6233	-0.001058
6234	-0.001066
6235	-0.000733
6236	-0.000935
6237	-0.001208
6238	-0.001056
6239	-0.00064
6240	0
6241	0
6242	-0.000108
6243	-0.000332
6244	-0.000987
6245	-0.001192
6246	-0.001236
6247	-0.001196
6248	-0.001521
6249	-0.001256
6250	-0.000876
6251	-0.001066
6252	-0.001296
6253	-0.001596
6254	-0.002008
6255	-0.002246
6256	-0.002282
6257	-0.002164
6258	-0.002121
6259	-0.001751
6260	-0.001596
6261	-0.001511
6262	-0.001349
6263	-0.001373
6264	-0.001607
6265	-0.002069
6266	-0.002311
6267	-0.001993
6268	-0.001789
6269	-0.002315
6270	-0.003358
6271	-0.003422
6272	-0.00334
6273	-0.003433
6274	-0.003274
6275	-0.003101
6276	-0.003187
6277	-0.003394
6278	-0.003318
6279	-0.003115
6280	-0.003176
6281	-0.003384
6282	-0.003276
6283	-0.003002
6284	-0.003108
6285	-0.00349
6286	-0.003589
6287	-0.003354
6288	-0.003285
6289	-0.003405
6290	-0.003437
6291	-0.003312
6292	-0.003216
6293	-0.003348
6294	-0.003501
6295	-0.003619
6296	-0.00358
6297	-0.00364
6298	-0.003909
6299	-0.003843
6300	-0.00374
6301	-0.003848
6302	-0.003806
6303	-0.003624
6304	-0.003793
6305	-0.003921
6306	-0.003555
6307	-0.003374
6308	-0.003181
6309	-0.003289
6310	-0.00351
6311	-0.003499
6312	-0.003262
6313	-0.003066
6314	-0.002972
6315	-0.003151
6316	-0.003026
6317	-0.003245
6318	-0.003473
6319	-0.003444
6320	-0.003509
6321	-0.003593
6322	-0.003246
6323	-0.003239
6324	-0.003248
6325	-0.003089
6326	-0.003045
6327	-0.002799
6328	-0.002541
6329	-0.002194
6330	-0.001851
6331	-0.001869
6332	-0.002144
6333	-0.002788
6334	-0.002983
6335	-0.002791
6336	-0.002362
6337	-0.002121
6338	-0.001721
6339	-0.001543
6340	-0.001811
6341	-0.002223
6342	-0.002133
6343	-0.00191
6344	-0.001732
6345	-0.001758
6346	-0.002202
6347	-0.002438
6348	-0.002412
6349	-0.002464
6350	-0.002266
6351	-0.002266
6352	-0.002469
6353	-0.002456
6354	-0.002281
6355	-0.002098
6356	-0.0021
6357	-0.002206
6358	-0.002435
6359	-0.002591
6360	-0.002718
6361	-0.003168
6362	-0.003469
6363	-0.003228
6364	-0.002779
6365	-0.002385
6366	-0.002076
6367	-0.002016
6368	-0.002125
6369	-0.001938
6370	-0.002164
6371	-0.002548
6372	-0.00265
6373	-0.002711
6374	-0.003011
6375	-0.00318
6376	-0.002938
6377	-0.002844
6378	-0.003094
6379	-0.003585
6380	-0.003701
6381	-0.003492
6382	-0.003504
6383	-0.003782
6384	-0.003645
6385	-0.003318
6386	-0.00308
6387	-0.003192
6388	-0.003214
6389	-0.002716
6390	-0.002344
6391	-0.00218
6392	-0.002533
6393	-0.002829
6394	-0.002987
6395	-0.002759
6396	-0.002432
6397	-0.00251
6398	-0.002826
6399	-0.002695
6400	-0.002231
6401	-0.002244
6402	-0.002145
6403	-0.001694
6404	-0.001551
6405	-0.001605
6406	-0.001368
6407	-0.00096
6408	-0.001112
6409	-0.001447
6410	-0.001667
6411	-0.002065
6412	-0.002001
6413	-0.002106
6414	-0.002371
6415	-0.002387
6416	-0.002319
6417	-0.002398
6418	-0.002216
6419	-0.002123
6420	-0.002222
6421	-0.002122
6422	-0.002212
6423	-0.002603
6424	-0.003042
6425	-0.002977
6426	-0.003078
6427	-0.002964
6428	-0.002596
6429	-0.002397
6430	-0.002318
6431	-0.002368
6432	-0.002448
6433	-0.002445
6434	-0.002619
6435	-0.002223
6436	-0.001979
6437	-0.002114
6438	-0.002431
6439	-0.002295
6440	-0.002451
6441	-0.002819
6442	-0.002933
6443	-0.002893
6444	-0.00261
6445	-0.002555
6446	-0.002627
6447	-0.002917
6448	-0.003082
6449	-0.002674
6450	-0.002376
6451	-0.002425
6452	-0.002131
6453	-0.001641
6454	-0.001458
6455	-0.001382
6456	-0.001286
6457	-0.001494
6458	-0.001691
6459	-0.001552
6460	-0.001304
6461	-0.001316
6462	-0.001205
6463	-0.001528
6464	-0.001876
6465	-0.002364
6466	-0.002557
6467	-0.00249
6468	-0.002474
6469	-0.002064
6470	-0.001557
6471	-0.001222
6472	-0.001398
6473	-0.001689
6474	-0.00196
6475	-0.001863
6476	-0.002067
6477	-0.002184
6478	-0.002467
6479	-0.002204
6480	-0.001822
6481	-0.001542
6482	-0.001625
6483	-0.001628
6484	-0.001394
6485	-0.001339
6486	-0.001606
6487	-0.00198
6488	-0.002171
6489	-0.002563
6490	-0.002732
6491	-0.002617
6492	-0.002524
6493	-0.002656
6494	-0.00301
6495	-0.00283
6496	-0.002745
6497	-0.002635
6498	-0.002735
6499	-0.002852
6500	-0.002761
6501	-0.002603
6502	-0.002401
6503	-0.002573
6504	-0.002963
6505	-0.003217
6506	-0.003339
6507	-0.002933
6508	-0.002509
6509	-0.002672
6510	-0.002873
6511	-0.003038
6512	-0.003008
6513	-0.003015
6514	-0.002732
6515	-0.00258
6516	-0.002479
6517	-0.002301
6518	-0.002145
6519	-0.002162
6520	-0.002421
6521	-0.0027
6522	-0.002152
6523	-0.001587
6524	-0.001656
6525	-0.002213
6526	-0.002793
6527	-0.002902
6528	-0.002613
6529	-0.00262
6530	-0.002808
6531	-0.00285
6532	-0.002917
6533	-0.002579
6534	-0.002327
6535	-0.002276
6536	-0.002109
6537	-0.002187
6538	-0.002659
6539	-0.002942
6540	-0.003095
6541	-0.003194
6542	-0.003281
6543	-0.003306
6544	-0.003228
6545	-0.003384
6546	-0.003686
6547	-0.003643
6548	-0.003675
6549	-0.003593
6550	-0.003609
6551	-0.003337
6552	-0.003212
6553	-0.003373
6554	-0.003695
6555	-0.003736
6556	-0.00361
6557	-0.00367
6558	-0.003971
6559	-0.00383
6560	-0.00364
6561	-0.003693
6562	-0.003948
6563	-0.004033
6564	-0.004135
6565	-0.003856
6566	-0.00351
6567	-0.003527
6568	-0.003352
6569	-0.003509
6570	-0.003697
6571	-0.003503
6572	-0.003185
6573	-0.003577
6574	-0.003732
6575	-0.003444
6576	-0.003142
6577	-0.00293
6578	-0.002746
6579	-0.002604
6580	-0.00253
6581	-0.002905
6582	-0.003293
6583	-0.003118
6584	-0.003262
6585	-0.003358
6586	-0.003398
6587	-0.003172
6588	-0.00301
6589	-0.002972
6590	-0.003138
6591	-0.003548
6592	-0.003552
6593	-0.003501
6594	-0.003557
6595	-0.003484
6596	-0.003394
6597	-0.003494
6598	-0.003182
6599	-0.00273
6600	-0.002363
6601	-0.002394
6602	-0.002495
6603	-0.002873
6604	-0.003035
6605	-0.003085
6606	-0.003044
6607	-0.002892
6608	-0.002877
6609	-0.002894
6610	-0.003177
6611	-0.003453
6612	-0.003234
6613	-0.002716
6614	-0.002647
6615	-0.003039
6616	-0.003138
6617	-0.002626
6618	-0.002217
6619	-0.002061
6620	-0.002079
6621	-0.001932
6622	-0.002035
6623	-0.002234
6624	-0.002403
6625	-0.002555
6626	-0.002766
6627	-0.002628
6628	-0.002385
6629	-0.00221
6630	-0.002148
6631	-0.002207
6632	-0.002301
6633	-0.002723
6634	-0.00271
6635	-0.002358
6636	-0.002152
6637	-0.002375
6638	-0.002661
6639	-0.002743
6640	-0.002616
6641	-0.00264
6642	-0.002601
6643	-0.002611
6644	-0.002515
6645	-0.002591
6646	-0.002929
6647	-0.003115
6648	-0.003056
6649	-0.002822
6650	-0.002633
6651	-0.002597
6652	-0.002607
6653	-0.002654
6654	-0.002508
6655	-0.002397
6656	-0.002485
6657	-0.002585
6658	-0.002482
6659	-0.002411
6660	-0.002448
6661	-0.002552
6662	-0.002627
6663	-0.002654
6664	-0.002314
6665	-0.002047
6666	-0.002204
6667	-0.001926
6668	-0.001826
6669	-0.001817
6670	-0.001884
6671	-0.001939
6672	-0.002089
6673	-0.002408
6674	-0.002545
6675	-0.002589
6676	-0.002466
6677	-0.002127
6678	-0.002053
6679	-0.002172
6680	-0.002677
6681	-0.002867
6682	-0.002746
6683	-0.002369
6684	-0.002232
6685	-0.002442
6686	-0.002422
6687	-0.00213
6688	-0.002097
6689	-0.001971
6690	-0.00195
6691	-0.001702
6692	-0.002289
6693	-0.002864
6694	-0.002611
6695	-0.00245
6696	-0.002654
6697	-0.002774
6698	-0.002687
6699	-0.002957
6700	-0.003018
6701	-0.003228
6702	-0.003311
6703	-0.003303
6704	-0.003137
6705	-0.003065
6706	-0.003202
6707	-0.003197
6708	-0.003109
6709	-0.003004
6710	-0.002998
6711	-0.003122
6712	-0.003115
6713	-0.002736
6714	-0.002378
6715	-0.002212
6716	-0.002435
6717	-0.003103
6718	-0.003447
6719	-0.003255
6720	-0.002972
6721	-0.002567
6722	-0.002384
6723	-0.002446
6724	-0.002734
6725	-0.002894
6726	-0.002933
6727	-0.002858
6728	-0.002762
6729	-0.003116
6730	-0.003375
6731	-0.003468
6732	-0.003811
6733	-0.003879
6734	-0.003904
6735	-0.003859
6736	-0.003509
6737	-0.003399
6738	-0.003403
6739	-0.003725
6740	-0.003742
6741	-0.003536
6742	-0.003462
6743	-0.003255
6744	-0.003008
6745	-0.003008
6746	-0.003262
6747	-0.003261
6748	-0.003744
6749	-0.003922
6750	-0.003932
6751	-0.003881
6752	-0.003672
6753	-0.003456
6754	-0.003472
6755	-0.003674
6756	-0.003913
6757	-0.003676
6758	-0.003267
6759	-0.002986
6760	-0.002893
6761	-0.003095
6762	-0.003182
6763	-0.003166
6764	-0.002997
6765	-0.003048
6766	-0.003251
6767	-0.003222
6768	-0.003014
6769	-0.002982
6770	-0.003378
6771	-0.003271
6772	-0.00334
6773	-0.003678
6774	-0.003884
6775	-0.003771
6776	-0.003302
6777	-0.002995
6778	-0.002566
6779	-0.002928
6780	-0.003213
6781	-0.003347
6782	-0.003312
6783	-0.003627
6784	-0.003634
6785	-0.003445
6786	-0.003244
6787	-0.003001
6788	-0.00319
6789	-0.003156
6790	-0.003075
6791	-0.003085
6792	-0.003319
6793	-0.003117
6794	-0.003018
6795	-0.003065
6796	-0.003008
6797	-0.003064
6798	-0.002972
6799	-0.002752
6800	-0.002827
6801	-0.003015
6802	-0.003237
6803	-0.003215
6804	-0.003025
6805	-0.003287
6806	-0.003801
6807	-0.004192
6808	-0.004476
6809	-0.004827
6810	-0.004491
6811	-0.004031
6812	-0.003686
6813	-0.003494
6814	-0.003637
6815	-0.003917
6816	-0.003994
6817	-0.003875
6818	-0.003965
6819	-0.004228
6820	-0.004093
6821	-0.003814
6822	-0.003906
6823	-0.004112
6824	-0.004442
6825	-0.004367
6826	-0.004337
6827	-0.004017
6828	-0.004108
6829	-0.004476
6830	-0.004445
6831	-0.004441
6832	-0.004348
6833	-0.004326
6834	-0.004103
6835	-0.003452
6836	-0.002749
6837	-0.002504
6838	-0.002894
6839	-0.003498
6840	-0.00416
6841	-0.003951
6842	-0.004059
6843	-0.004118
6844	-0.003764
6845	-0.003485
6846	-0.00359
6847	-0.003345
6848	-0.003107
6849	-0.0035
6850	-0.003973
6851	-0.003999
6852	-0.003703
6853	-0.003399
6854	-0.003235
6855	-0.003107
6856	-0.003528
6857	-0.003901
6858	-0.003532
6859	-0.002676
6860	-0.002409
6861	-0.002447
6862	-0.002398
6863	-0.00249
6864	-0.002605
6865	-0.002888
6866	-0.003308
6867	-0.003658
6868	-0.003315
6869	-0.003224
6870	-0.003234
6871	-0.003283
6872	-0.003334
6873	-0.003332
6874	-0.003473
6875	-0.003408
6876	-0.003321
6877	-0.003195
6878	-0.003503
6879	-0.00348
6880	-0.003312
6881	-0.003102
6882	-0.00311
6883	-0.002882
6884	-0.003165
6885	-0.003225
6886	-0.00354
6887	-0.003622
6888	-0.003654
6889	-0.003464
6890	-0.003228
6891	-0.003195
6892	-0.003215
6893	-0.002891
6894	-0.003027
6895	-0.002856
6896	-0.002587
6897	-0.002457
6898	-0.002686
6899	-0.002569
6900	-0.002676
6901	-0.002657
6902	-0.002508
6903	-0.002407
6904	-0.002751
6905	-0.002669
6906	-0.002317
6907	-0.002289
6908	-0.002648
6909	-0.003052
6910	-0.003345
6911	-0.003426
6912	-0.002943
6913	-0.002777
6914	-0.002779
6915	-0.003177
6916	-0.003507
6917	-0.003426
6918	-0.002982
6919	-0.002966
6920	-0.003321
6921	-0.003237
6922	-0.003033
6923	-0.002939
6924	-0.003105
6925	-0.003246
6926	-0.003236
6927	-0.00295
6928	-0.002923
6929	-0.003026
6930	-0.003041
6931	-0.003066
6932	-0.003126
6933	-0.00331
6934	-0.00273
6935	-0.002163
6936	-0.002023
6937	-0.00221
6938	-0.002193
6939	-0.002408
6940	-0.002718
6941	-0.002994
6942	-0.003071
6943	-0.002815
6944	-0.002739
6945	-0.002686
6946	-0.002888
6947	-0.002954
6948	-0.002935
6949	-0.002666
6950	-0.002892
6951	-0.002979
6952	-0.00278
6953	-0.002657
6954	-0.00304
6955	-0.003042
6956	-0.002706
6957	-0.00244
6958	-0.002657
6959	-0.00267
6960	-0.002541
6961	-0.00266
6962	-0.003054
6963	-0.003173
6964	-0.003229
6965	-0.003255
6966	-0.003106
6967	-0.002754
6968	-0.00249
6969	-0.002503
6970	-0.002624
6971	-0.0028
6972	-0.003194
6973	-0.003491
6974	-0.003746
6975	-0.003566
6976	-0.003307
6977	-0.003382
6978	-0.003857
6979	-0.004042
6980	-0.003719
6981	-0.00341
6982	-0.003103
6983	-0.0035
6984	-0.003632
6985	-0.003769
6986	-0.003711
6987	-0.003503
6988	-0.003489
6989	-0.003725
6990	-0.003704
6991	-0.003538
6992	-0.003783
6993	-0.003888
6994	-0.003796
6995	-0.003851
6996	-0.003984
6997	-0.004126
6998	-0.004473
6999	-0.004085
7000	-0.003822
7001	-0.003433
7002	-0.003048
7003	-0.003104
7004	-0.003585
7005	-0.003715
7006	-0.003766
7007	-0.003708
7008	-0.003581
7009	-0.003697
7010	-0.003894
7011	-0.00384
7012	-0.003553
7013	-0.003471
7014	-0.003467
7015	-0.003573
7016	-0.003425
7017	-0.003458
7018	-0.003334
7019	-0.003919
7020	-0.004297
7021	-0.004387
7022	-0.004103
7023	-0.003995
7024	-0.003854
7025	-0.003791
7026	-0.004135
7027	-0.004365
7028	-0.004315
7029	-0.004001
7030	-0.003814
7031	-0.00375
7032	-0.003655
7033	-0.003549
7034	-0.003672
7035	-0.003867
7036	-0.003911
7037	-0.004287
7038	-0.004517
7039	-0.004524
7040	-0.004343
7041	-0.004273
7042	-0.004263
7043	-0.004231
7044	-0.004317
7045	-0.004137
7046	-0.003928
7047	-0.003888
7048	-0.003723
7049	-0.003569
7050	-0.003438
7051	-0.003855
7052	-0.003979
7053	-0.004194
7054	-0.004614
7055	-0.004936
7056	-0.005044
7057	-0.004983
7058	-0.005238
7059	-0.005294
7060	-0.005235
7061	-0.00518
7062	-0.005185
7063	-0.005179
7064	-0.004627
7065	-0.00452
7066	-0.004572
7067	-0.004787
7068	-0.004434
7069	-0.004298
7070	-0.004399
7071	-0.004608
7072	-0.00439
7073	-0.004241
7074	-0.004196
7075	-0.004389
7076	-0.00464
7077	-0.00473
7078	-0.004587
7079	-0.004646
7080	-0.004937
7081	-0.005093
7082	-0.004918
7083	-0.004674
7084	-0.004257
7085	-0.004265
7086	-0.004566
7087	-0.004818
7088	-0.004912
7089	-0.004624
7090	-0.00434
7091	-0.004333
7092	-0.00433
7093	-0.004342
7094	-0.004472
7095	-0.004639
7096	-0.004248
7097	-0.004106
7098	-0.003802
7099	-0.003404
7100	-0.003641
7101	-0.003919
7102	-0.003943
7103	-0.003518
7104	-0.003068
7105	-0.003147
7106	-0.003338
7107	-0.003593
7108	-0.003874
7109	-0.003725
7110	-0.003853
7111	-0.003938
7112	-0.00367
7113	-0.003706
7114	-0.003881
7115	-0.003871
7116	-0.003749
7117	-0.003842
7118	-0.003726
7119	-0.003467
7120	-0.003251
7121	-0.003199
7122	-0.003033
7123	-0.002859
7124	-0.002389
7125	-0.002436
7126	-0.002834
7127	-0.003176
7128	-0.002972
7129	-0.002877
7130	-0.003022
7131	-0.003276
7132	-0.003185
7133	-0.002924
7134	-0.002596
7135	-0.002594
7136	-0.002639
7137	-0.002749
7138	-0.002769
7139	-0.002784
7140	-0.002763
7141	-0.002946
7142	-0.003108
7143	-0.003116
7144	-0.003148
7145	-0.003341
7146	-0.003598
7147	-0.00346
7148	-0.003674
7149	-0.003621
7150	-0.003701
7151	-0.003733
7152	-0.0039
7153	-0.004187
7154	-0.004044
7155	-0.003946
7156	-0.003839
7157	-0.004001
7158	-0.004095
7159	-0.004145
7160	-0.004379
7161	-0.00433
7162	-0.003928
7163	-0.003638
7164	-0.003692
7165	-0.003772
7166	-0.003823
7167	-0.004107
7168	-0.004418
7169	-0.004615
7170	-0.004533
7171	-0.00427
7172	-0.00419
7173	-0.004447
7174	-0.004462
7175	-0.004368
7176	-0.004372
7177	-0.004097
7178	-0.004092
7179	-0.003955
7180	-0.004109
7181	-0.004262
7182	-0.004296
7183	-0.004201
7184	-0.0044
7185	-0.004471
7186	-0.004511
7187	-0.004337
7188	-0.004485
7189	-0.004331
7190	-0.004297
7191	-0.004441
7192	-0.004478
7193	-0.004349
7194	-0.004389
7195	-0.004472
7196	-0.004578
7197	-0.004459
7198	-0.004157
7199	-0.003764
7200	-0.003834
7201	-0.004018
7202	-0.004017
7203	-0.003762
7204	-0.003421
7205	-0.003408
7206	-0.003534
7207	-0.003557
7208	-0.003458
7209	-0.003221
7210	-0.003335
7211	-0.003571
7212	-0.003676
7213	-0.00382
7214	-0.004062
7215	-0.003913
7216	-0.003687
7217	-0.003709
7218	-0.00388
7219	-0.003633
7220	-0.003444
7221	-0.003852
7222	-0.004435
7223	-0.004699
7224	-0.004852
7225	-0.004975
7226	-0.005009
7227	-0.004963
7228	-0.004926
7229	-0.004902
7230	-0.005107
7231	-0.005217
7232	-0.005058
7233	-0.004807
7234	-0.004803
7235	-0.005049
7236	-0.004968
7237	-0.004367
7238	-0.004141
7239	-0.004218
7240	-0.004205
7241	-0.00428
7242	-0.004699
7243	-0.004969
7244	-0.005031
7245	-0.005021
7246	-0.004932
7247	-0.005134
7248	-0.004957
7249	-0.00519
7250	-0.005263
7251	-0.004924
7252	-0.004831
7253	-0.005089
7254	-0.005411
7255	-0.005562
7256	-0.00545
7257	-0.005496
7258	-0.005263
7259	-0.005424
7260	-0.00554
7261	-0.005213
7262	-0.005015
7263	-0.004911
7264	-0.004947
7265	-0.005152
7266	-0.00547
7267	-0.005496
7268	-0.005312
7269	-0.005032
7270	-0.004822
7271	-0.004999
7272	-0.005141
7273	-0.00518
7274	-0.005007
7275	-0.00505
7276	-0.005253
7277	-0.00525
7278	-0.004852
7279	-0.004344
7280	-0.004415
7281	-0.004634
7282	-0.004872
7283	-0.0048
7284	-0.004555
7285	-0.004427
7286	-0.004602
7287	-0.004718
7288	-0.004609
7289	-0.004418
7290	-0.00423
7291	-0.003854
7292	-0.004068
7293	-0.004344
7294	-0.004413
7295	-0.004051
7296	-0.003548
7297	-0.003408
7298	-0.003862
7299	-0.004346
7300	-0.004258
7301	-0.004288
7302	-0.004403
7303	-0.004434
7304	-0.004443
7305	-0.004785
7306	-0.004815
7307	-0.004433
7308	-0.004359
7309	-0.004419
7310	-0.004513
7311	-0.004707
7312	-0.004814
7313	-0.004663
7314	-0.004353
7315	-0.003961
7316	-0.004137
7317	-0.004373
7318	-0.004453
7319	-0.004628
7320	-0.00481
7321	-0.004822
7322	-0.004714
7323	-0.004642
7324	-0.004576
7325	-0.004566
7326	-0.004562
7327	-0.004674
7328	-0.004793
7329	-0.004653
7330	-0.004433
7331	-0.004437
7332	-0.004388
7333	-0.004388
7334	-0.004468
7335	-0.004511
7336	-0.00425
7337	-0.004304
7338	-0.004326
7339	-0.004425
7340	-0.004824
7341	-0.00511
7342	-0.005077
7343	-0.004732
7344	-0.004728
7345	-0.005248
7346	-0.005463
7347	-0.005444
7348	-0.005459
7349	-0.005478
7350	-0.005459
7351	-0.005439
7352	-0.00557
7353	-0.005542
7354	-0.00536
7355	-0.005078
7356	-0.005523
7357	-0.005808
7358	-0.005644
7359	-0.005418
7360	-0.005506
7361	-0.005286
7362	-0.004904
7363	-0.005054
7364	-0.005115
7365	-0.00501
7366	-0.005144
7367	-0.005333
7368	-0.005432
7369	-0.00525
7370	-0.005045
7371	-0.004973
7372	-0.005087
7373	-0.005246
7374	-0.005111
7375	-0.004739
7376	-0.004668
7377	-0.004542
7378	-0.004423
7379	-0.004286
7380	-0.004358
7381	-0.004251
7382	-0.004235
7383	-0.004164
7384	-0.00411
7385	-0.004057
7386	-0.003584
7387	-0.00328
7388	-0.003244
7389	-0.003265
7390	-0.003116
7391	-0.003212
7392	-0.002987
7393	-0.003087
7394	-0.003243
7395	-0.003847
7396	-0.004098
7397	-0.003892
7398	-0.003658
7399	-0.003718
7400	-0.003495
7401	-0.00348
7402	-0.003562
7403	-0.00379
7404	-0.004045
7405	-0.003867
7406	-0.003143
7407	-0.002905
7408	-0.003287
7409	-0.00339
7410	-0.003637
7411	-0.003755
7412	-0.003808
7413	-0.003807
7414	-0.003964
7415	-0.00379
7416	-0.003383
7417	-0.003276
7418	-0.003252
7419	-0.003113
7420	-0.003204
7421	-0.003539
7422	-0.003532
7423	-0.00368
7424	-0.003589
7425	-0.003643
7426	-0.003879
7427	-0.00389
7428	-0.003373
7429	-0.003014
7430	-0.003061
7431	-0.003614
7432	-0.003657
7433	-0.003595
7434	-0.003331
7435	-0.003229
7436	-0.003381
7437	-0.003722
7438	-0.003943
7439	-0.004091
7440	-0.003992
7441	-0.003997
7442	-0.004057
7443	-0.003767
7444	-0.003728
7445	-0.003653
7446	-0.00393
7447	-0.00396
7448	-0.004158
7449	-0.004128
7450	-0.004039
7451	-0.003906
7452	-0.004019
7453	-0.004103
7454	-0.004248
7455	-0.004183
7456	-0.004113
7457	-0.004269
7458	-0.004152
7459	-0.004005
7460	-0.003678
7461	-0.00355
7462	-0.003632
7463	-0.003636
7464	-0.003551
7465	-0.003507
7466	-0.003628
7467	-0.003904
7468	-0.004468
7469	-0.004635
7470	-0.004591
7471	-0.004536
7472	-0.00442
7473	-0.004176
7474	-0.003967
7475	-0.004132
7476	-0.004087
7477	-0.004524
7478	-0.004797
7479	-0.004532
7480	-0.004506
7481	-0.004744
7482	-0.004716
7483	-0.004539
7484	-0.00444
7485	-0.004087
7486	-0.004029
7487	-0.00417
7488	-0.004459
7489	-0.004897
7490	-0.005463
7491	-0.005518
7492	-0.005505
7493	-0.005654
7494	-0.006069
7495	-0.005801
7496	-0.00542
7497	-0.005403
7498	-0.005604
7499	-0.005474
7500	-0.005279
7501	-0.005253
7502	-0.005293
7503	-0.004936
7504	-0.004679
7505	-0.004802
7506	-0.004757
7507	-0.004664
7508	-0.004736
7509	-0.004598
7510	-0.004526
7511	-0.004928
7512	-0.005212
7513	-0.005147
7514	-0.004773
7515	-0.004403
7516	-0.004515
7517	-0.004675
7518	-0.004728
7519	-0.004541
7520	-0.004934
7521	-0.005156
7522	-0.004786
7523	-0.004367
7524	-0.004312
7525	-0.003904
7526	-0.003571
7527	-0.003968
7528	-0.004276
7529	-0.004151
7530	-0.003899
7531	-0.003893
7532	-0.003619
7533	-0.003505
7534	-0.003705
7535	-0.003572
7536	-0.003668
7537	-0.003946
7538	-0.004102
7539	-0.004044
7540	-0.004045
7541	-0.004153
7542	-0.004432
7543	-0.004846
7544	-0.004668
7545	-0.004354
7546	-0.004188
7547	-0.004294
7548	-0.004405
7549	-0.004742
7550	-0.004711
7551	-0.004377
7552	-0.004047
7553	-0.00427
7554	-0.004457
7555	-0.004462
7556	-0.004198
7557	-0.004203
7558	-0.004386
7559	-0.004546
7560	-0.004479
7561	-0.004217
7562	-0.00418
7563	-0.004204
7564	-0.004358
7565	-0.004403
7566	-0.004342
7567	-0.004179
7568	-0.004162
7569	-0.004503
7570	-0.004943
7571	-0.004326
7572	-0.004065
7573	-0.004482
7574	-0.004498
7575	-0.004333
7576	-0.004158
7577	-0.003949
7578	-0.003698
7579	-0.003677
7580	-0.003488
7581	-0.003293
7582	-0.003399
7583	-0.003361
7584	-0.003091
7585	-0.003059
7586	-0.003167
7587	-0.00332
7588	-0.00311
7589	-0.002992
7590	-0.003441
7591	-0.003488
7592	-0.003247
7593	-0.003388
7594	-0.003443
7595	-0.00351
7596	-0.003679
7597	-0.00369
7598	-0.003622
7599	-0.003341
7600	-0.003233
7601	-0.003541
7602	-0.004092
7603	-0.004306
7604	-0.004316
7605	-0.004469
7606	-0.004742
7607	-0.005001
7608	-0.00516
7609	-0.004817
7610	-0.004622
7611	-0.004974
7612	-0.004989
7613	-0.004854
7614	-0.004643
7615	-0.004561
7616	-0.004648
7617	-0.004838
7618	-0.005038
7619	-0.00486
7620	-0.004668
7621	-0.004506
7622	-0.004309
7623	-0.004138
7624	-0.004003
7625	-0.003977
7626	-0.004119
7627	-0.004145
7628	-0.004165
7629	-0.004475
7630	-0.004682
7631	-0.004637
7632	-0.004563
7633	-0.004432
7634	-0.004293
7635	-0.004322
7636	-0.004658
7637	-0.004968
7638	-0.005392
7639	-0.00538
7640	-0.005071
7641	-0.004696
7642	-0.00455
7643	-0.004658
7644	-0.004879
7645	-0.005137
7646	-0.005298
7647	-0.005175
7648	-0.004968
7649	-0.005016
7650	-0.00509
7651	-0.004772
7652	-0.004591
7653	-0.00487
7654	-0.00502
7655	-0.005045
7656	-0.004842
7657	-0.004526
7658	-0.004834
7659	-0.005148
7660	-0.005284
7661	-0.005454
7662	-0.005406
7663	-0.005409
7664	-0.005383
7665	-0.005452
7666	-0.005842
7667	-0.005827
7668	-0.005919
7669	-0.005739
7670	-0.005492
7671	-0.005435
7672	-0.005503
7673	-0.005769
7674	-0.005657
7675	-0.005722
7676	-0.005603
7677	-0.005674
7678	-0.005678
7679	-0.005753
7680	-0.005657
7681	-0.005212
7682	-0.004966
7683	-0.004735
7684	-0.004466
7685	-0.003908
7686	-0.00343
7687	-0.003365
7688	-0.003262
7689	-0.003219
7690	-0.003027
7691	-0.002809
7692	-0.002654
7693	-0.002595
7694	-0.002234
7695	-0.002139
7696	-0.002151
7697	-0.002637
7698	-0.002977
7699	-0.002674
7700	-0.002832
7701	-0.003215
7702	-0.00333
7703	-0.003453
7704	-0.003656
7705	-0.003683
7706	-0.003703
7707	-0.004029
7708	-0.004226
7709	-0.004147
7710	-0.003911
7711	-0.003705
7712	-0.003446
7713	-0.003523
7714	-0.003745
7715	-0.00397
7716	-0.003969
7717	-0.004046
7718	-0.00376
7719	-0.003503
7720	-0.002873
7721	-0.00233
7722	-0.002213
7723	-0.00207
7724	-0.001872
7725	-0.001748
7726	-0.001568
7727	-0.001482
7728	-0.001717
7729	-0.001959
7730	-0.00221
7731	-0.002239
7732	-0.002493
7733	-0.00291
7734	-0.003077
7735	-0.002786
7736	-0.0024
7737	-0.002561
7738	-0.002547
7739	-0.002123
7740	-0.002024
7741	-0.001848
7742	-0.00168
7743	-0.001722
7744	-0.002111
7745	-0.002091
7746	-0.001964
7747	-0.001939
7748	-0.002131
7749	-0.002066
7750	-0.002163
7751	-0.002217
7752	-0.002543
7753	-0.002955
7754	-0.003062
7755	-0.003352
7756	-0.003483
7757	-0.003323
7758	-0.003132
7759	-0.003195
7760	-0.003227
7761	-0.003244
7762	-0.003186
7763	-0.003269
7764	-0.003539
7765	-0.003535
7766	-0.003548
7767	-0.003179
7768	-0.002758
7769	-0.002578
7770	-0.002631
7771	-0.002662
7772	-0.003335
7773	-0.003693
7774	-0.003987
7775	-0.004157
7776	-0.003713
7777	-0.003674
7778	-0.003752
7779	-0.003283
7780	-0.002826
7781	-0.002627
7782	-0.002469
7783	-0.00243
7784	-0.002343
7785	-0.002536
7786	-0.002776
7787	-0.002767
7788	-0.002815
7789	-0.003173
7790	-0.003825
7791	-0.003875
7792	-0.003552
7793	-0.003184
7794	-0.002807
7795	-0.002468
7796	-0.002305
7797	-0.002308
7798	-0.002505
7799	-0.002796
7800	-0.002848
7801	-0.002838
7802	-0.002629
7803	-0.002796
7804	-0.002923
7805	-0.003123
7806	-0.003113
7807	-0.003302
7808	-0.003643
7809	-0.003578
7810	-0.003753
7811	-0.003737
7812	-0.003368
7813	-0.003206
7814	-0.003025
7815	-0.002688
7816	-0.002517
7817	-0.002545
7818	-0.002441
7819	-0.002737
7820	-0.003045
7821	-0.003282
7822	-0.002858
7823	-0.002753
7824	-0.002967
7825	-0.003189
7826	-0.002925
7827	-0.002925
7828	-0.002943
7829	-0.002774
7830	-0.002551
7831	-0.00244
7832	-0.00246
7833	-0.002721
7834	-0.002792
7835	-0.002733
7836	-0.00242
7837	-0.002391
7838	-0.002528
7839	-0.002423
7840	-0.00238
7841	-0.002495
7842	-0.002457
7843	-0.002515
7844	-0.002257
7845	-0.002233
7846	-0.002571
7847	-0.002372
7848	-0.002176
7849	-0.002682
7850	-0.003316
7851	-0.003219
7852	-0.003238
7853	-0.003553
7854	-0.003573
7855	-0.003332
7856	-0.003014
7857	-0.002838
7858	-0.002681
7859	-0.00273
7860	-0.002657
7861	-0.002562
7862	-0.002516
7863	-0.002692
7864	-0.002816
7865	-0.002623
7866	-0.002629
7867	-0.002965
7868	-0.003064
7869	-0.002883
7870	-0.002573
7871	-0.002707
7872	-0.002961
7873	-0.003257
7874	-0.003206
7875	-0.00314
7876	-0.003011
7877	-0.002951
7878	-0.002861
7879	-0.002639
7880	-0.002458
7881	-0.002417
7882	-0.002568
7883	-0.002897
7884	-0.002988
7885	-0.00293
7886	-0.002717
7887	-0.00261
7888	-0.002758
7889	-0.002515
7890	-0.002597
7891	-0.002589
7892	-0.002261
7893	-0.00226
7894	-0.00211
7895	-0.002444
7896	-0.002887
7897	-0.003262
7898	-0.003543
7899	-0.003559
7900	-0.003194
7901	-0.002975
7902	-0.002732
7903	-0.002691
7904	-0.002709
7905	-0.002703
7906	-0.002725
7907	-0.002715
7908	-0.002673
7909	-0.002772
7910	-0.002972
7911	-0.002883
7912	-0.003005
7913	-0.002783
7914	-0.002679
7915	-0.002657
7916	-0.002898
7917	-0.002739
7918	-0.002483
7919	-0.002267
7920	-0.002152
7921	-0.002071
7922	-0.002111
7923	-0.002391
7924	-0.002264
7925	-0.00191
7926	-0.002109
7927	-0.002532
7928	-0.002343
7929	-0.002054
7930	-0.002138
7931	-0.00233
7932	-0.002238
7933	-0.001633
7934	-0.001476
7935	-0.001705
7936	-0.002108
7937	-0.002321
7938	-0.002035
7939	-0.001869
7940	-0.002061
7941	-0.002566
7942	-0.00286
7943	-0.002929
7944	-0.002652
7945	-0.002212
7946	-0.002395
7947	-0.002517
7948	-0.002717
7949	-0.002601
7950	-0.00254
7951	-0.002481
7952	-0.00254
7953	-0.002655
7954	-0.002495
7955	-0.00249
7956	-0.002588
7957	-0.002497
7958	-0.00208
7959	-0.002044
7960	-0.002063
7961	-0.002139
7962	-0.002179
7963	-0.002501
7964	-0.0028
7965	-0.002828
7966	-0.002582
7967	-0.002301
7968	-0.001958
7969	-0.002047
7970	-0.002491
7971	-0.002308
7972	-0.002103
7973	-0.001841
7974	-0.001755
7975	-0.001801
7976	-0.00183
7977	-0.00152
7978	-0.001509
7979	-0.001759
7980	-0.002026
7981	-0.002346
7982	-0.002538
7983	-0.002341
7984	-0.002078
7985	-0.002205
7986	-0.002185
7987	-0.002245
7988	-0.002041
7989	-0.001858
7990	-0.00183
7991	-0.001941
7992	-0.002049
7993	-0.00193
7994	-0.001988
7995	-0.002046
7996	-0.002521
7997	-0.002638
7998	-0.002545
[truncated: 3,059 more rows]

## Sheet: V334dC 0.95 M
V334dC_	UV
6000	0.020489
6001	0.020517
6002	0.020456
6003	0.020528
6004	0.020637
6005	0.020601
6006	0.02052
6007	0.02046
6008	0.02038
6009	0.020321
6010	0.020329
6011	0.020317
6012	0.02031
6013	0.020296
6014	0.020312
6015	0.020321
6016	0.020267
6017	0.020344
6018	0.020398
6019	0.020449
6020	0.020417
6021	0.020301
6022	0.020234
6023	0.020356
6024	0.020414
6025	0.020419
6026	0.020361
6027	0.020291
6028	0.020269
6029	0.020304
6030	0.020346
6031	0.020392
6032	0.020486
6033	0.020532
6034	0.020547
6035	0.020441
6036	0.020368
6037	0.020357
6038	0.020486
6039	0.020487
6040	0.020434
6041	0.020486
6042	0.02055
6043	0.02056
6044	0.020501
6045	0.020478
6046	0.020436
6047	0.020371
6048	0.020474
6049	0.020485
6050	0.020481
6051	0.020555
6052	0.020629
6053	0.020603
6054	0.020579
6055	0.020501
6056	0.0205
6057	0.020476
6058	0.020557
6059	0.020593
6060	0.02062
6061	0.020579
6062	0.020606
6063	0.020587
6064	0.020563
6065	0.020551
6066	0.020593
6067	0.020652
6068	0.020618
6069	0.020623
6070	0.020573
6071	0.020674
6072	0.020765
6073	0.020792
6074	0.020717
6075	0.020717
6076	0.020715
6077	0.02071
6078	0.020742
6079	0.020652
6080	0.020577
6081	0.020564
6082	0.020561
6083	0.020602
6084	0.02063
6085	0.020776
6086	0.020788
6087	0.020681
6088	0.020693
6089	0.020676
6090	0.020695
6091	0.020688
6092	0.020741
6093	0.020764
6094	0.020796
6095	0.020798
6096	0.020896
6097	0.020912
6098	0.020902
6099	0.020833
6100	0.020779
6101	0.02081
6102	0.020832
6103	0.020872
6104	0.020771
6105	0.020686
6106	0.020752
6107	0.020716
6108	0.020782
6109	0.02086
6110	0.020917
6111	0.020914
6112	0.021001
6113	0.021054
6114	0.020977
6115	0.020878
6116	0.020889
6117	0.020973
6118	0.021047
6119	0.021076
6120	0.021021
6121	0.020988
6122	0.021023
6123	0.020996
6124	0.021025
6125	0.020932
6126	0.020931
6127	0.021
6128	0.021032
6129	0.02102
6130	0.02099
6131	0.020959
6132	0.020846
6133	0.020751
6134	0.020699
6135	0.0207
6136	0.020747
6137	0.020781
6138	0.020809
6139	0.020872
6140	0.020855
6141	0.020887
6142	0.020844
6143	0.020825
6144	0.020773
6145	0.020813
6146	0.020841
6147	0.020754
6148	0.020771
6149	0.020815
6150	0.020874
6151	0.020872
6152	0.020862
6153	0.020797
6154	0.020832
6155	0.020822
6156	0.020817
6157	0.020802
6158	0.020801
6159	0.020764
6160	0.020828
6161	0.020876
6162	0.020918
6163	0.020899
6164	0.020805
6165	0.020766
6166	0.020832
6167	0.020925
6168	0.020999
6169	0.020905
6170	0.020929
6171	0.020849
6172	0.020739
6173	0.020704
6174	0.020748
6175	0.020677
6176	0.020669
6177	0.020603
6178	0.020572
6179	0.020625
6180	0.020713
6181	0.020721
6182	0.020664
6183	0.020644
6184	0.020685
6185	0.020647
6186	0.02059
6187	0.020535
6188	0.020578
6189	0.020647
6190	0.020647
6191	0.020658
6192	0.02073
6193	0.020754
6194	0.02071
6195	0.020616
6196	0.020638
6197	0.020643
6198	0.020673
6199	0.020656
6200	0.020637
6201	0.020585
6202	0.020573
6203	0.020631
6204	0.020601
6205	0.020583
6206	0.020627
6207	0.020682
6208	0.020647
6209	0.02064
6210	0.020714
6211	0.020783
6212	0.020775
6213	0.020822
6214	0.020874
6215	0.020852
6216	0.020838
6217	0.020743
6218	0.020641
6219	0.020672
6220	0.0207
6221	0.020713
6222	0.020717
6223	0.02068
6224	0.020666
6225	0.020679
6226	0.020635
6227	0.020583
6228	0.020551
6229	0.020522
6230	0.020606
6231	0.020691
6232	0.020736
6233	0.020667
6234	0.02057
6235	0.020561
6236	0.020553
6237	0.020619
6238	0.020589
6239	0.02055
6240	0
6241	4.7e-05
6242	8.5e-05
6243	8.1e-05
6244	2.1e-05
6245	4.8e-05
6246	6.3e-05
6247	0.000136
6248	0.000105
6249	0.000147
6250	0.000217
6251	0.000112
6252	3.6e-05
6253	-4e-05
6254	-6.4e-05
6255	-6.4e-05
6256	-5.7e-05
6257	-3.3e-05
6258	5e-05
6259	9.6e-05
6260	3.8e-05
6261	-4.3e-05
6262	1.8e-05
6263	6.9e-05
6264	7.5e-05
6265	1.2e-05
6266	-5.8e-05
6267	-8.7e-05
6268	3.3e-05
6269	5.6e-05
6270	2.8e-05
6271	5.5e-05
6272	0.000149
6273	0.000244
6274	0.000245
6275	0.000224
6276	0.000245
6277	0.00026
6278	0.000203
6279	0.000117
6280	1.8e-05
6281	-2.6e-05
6282	3.7e-05
6283	5.5e-05
6284	2e-06
6285	9.4e-05
6286	0.000136
6287	0.000136
6288	0.000203
6289	0.000286
6290	0.000258
6291	0.000205
6292	0.000244
6293	0.000291
6294	0.000301
6295	0.000295
6296	0.000364
6297	0.000414
6298	0.00036
6299	0.000382
6300	0.00044
6301	0.000439
6302	0.000385
6303	0.000348
6304	0.000283
6305	0.000332
6306	0.00038
6307	0.000411
6308	0.00047
6309	0.000504
6310	0.00044
6311	0.000413
6312	0.000386
6313	0.000325
6314	0.000327
6315	0.00038
6316	0.000481
6317	0.000499
6318	0.000493
6319	0.000409
6320	0.000338
6321	0.000268
6322	0.000293
6323	0.000434
6324	0.000529
6325	0.000518
6326	0.00048
6327	0.000421
6328	0.000354
6329	0.000321
6330	0.000333
6331	0.000331
6332	0.000347
6333	0.000335
6334	0.000316
6335	0.000301
6336	0.000262
6337	0.000307
6338	0.000379
6339	0.000395
6340	0.000402
6341	0.000319
6342	0.000225
6343	0.000233
6344	0.000204
6345	0.000203
6346	0.000111
6347	0.000114
6348	6e-05
6349	7.6e-05
6350	7.4e-05
6351	0.000217
6352	0.000281
6353	0.000229
6354	0.000244
6355	0.000295
6356	0.000408
6357	0.0003
6358	0.000257
6359	0.000345
6360	0.000378
6361	0.00034
6362	0.000214
6363	0.000115
6364	0.000123
6365	0.000209
6366	0.000239
6367	0.000163
6368	0.000159
6369	0.000256
6370	0.000234
6371	0.000169
6372	6.3e-05
6373	3.3e-05
6374	0.000117
6375	0.000164
6376	0.000184
6377	0.000155
6378	9.5e-05
6379	6.9e-05
6380	8.9e-05
6381	0.000108
6382	9.5e-05
6383	7e-05
6384	0.000152
6385	0.00028
6386	0.000321
6387	0.000415
6388	0.000396
6389	0.000397
6390	0.000332
6391	0.000274
6392	0.000265
6393	0.00029
6394	0.000328
6395	0.000345
6396	0.000411
6397	0.000419
6398	0.000413
6399	0.000449
6400	0.000435
6401	0.000464
6402	0.000438
6403	0.000377
6404	0.000318
6405	0.000391
6406	0.000428
6407	0.000465
6408	0.000443
6409	0.000347
6410	0.000322
6411	0.000357
6412	0.000414
6413	0.000445
6414	0.00042
6415	0.000402
6416	0.000361
6417	0.000403
6418	0.000464
6419	0.000422
6420	0.000313
6421	0.000349
6422	0.000415
6423	0.000434
6424	0.000299
6425	0.000226
6426	0.000283
6427	0.000329
6428	0.000317
6429	0.000274
6430	0.000226
6431	0.000248
6432	0.000377
6433	0.000464
6434	0.000396
6435	0.000289
6436	0.000246
6437	0.000254
6438	0.000287
6439	0.000332
6440	0.000364
6441	0.000262
6442	0.000213
6443	0.000252
6444	0.000254
6445	0.000235
6446	0.000214
6447	0.000223
6448	0.000218
6449	0.000168
6450	0.000173
6451	0.000234
6452	0.000291
6453	0.000292
6454	0.000286
6455	0.000272
6456	0.000328
6457	0.000313
6458	0.000393
6459	0.000441
6460	0.000457
6461	0.000401
6462	0.000338
6463	0.00027
6464	0.000246
6465	0.000301
6466	0.000341
6467	0.000375
6468	0.000428
6469	0.000412
6470	0.000407
6471	0.000387
6472	0.000377
6473	0.000319
6474	0.000273
6475	0.000317
6476	0.000425
6477	0.000417
6478	0.000354
6479	0.00033
6480	0.000383
6481	0.000378
6482	0.000367
6483	0.000335
6484	0.000324
6485	0.000426
6486	0.000543
6487	0.000535
6488	0.000378
6489	0.000263
6490	0.000269
6491	0.00032
6492	0.000329
6493	0.000283
6494	0.000276
6495	0.000234
6496	0.000232
6497	0.000278
6498	0.000292
6499	0.000283
6500	0.000228
6501	0.000217
6502	0.000289
6503	0.00045
6504	0.000431
6505	0.000244
6506	0.000145
6507	0.000157
6508	0.000193
6509	0.000137
6510	0.000148
6511	0.000142
6512	5.9e-05
6513	1.1e-05
6514	4.1e-05
6515	2.7e-05
6516	-3e-05
6517	-9.9e-05
6518	-0.00013
6519	-7.9e-05
6520	-6.6e-05
6521	-5.1e-05
6522	-4.2e-05
6523	-7.6e-05
6524	-2.1e-05
6525	4.3e-05
6526	8.5e-05
6527	3e-06
6528	1.4e-05
6529	-1e-06
6530	6.5e-05
6531	5.5e-05
6532	3.5e-05
6533	6.8e-05
6534	0.000167
6535	0.000209
6536	0.000127
6537	8.5e-05
6538	0.000214
6539	0.000223
6540	0.00018
6541	0.000166
6542	0.000137
6543	7.6e-05
6544	3.7e-05
6545	0.000101
6546	7.7e-05
6547	-3.5e-05
6548	-2.4e-05
6549	-4.8e-05
6550	-0.00012
6551	-0.000164
6552	-0.000212
6553	-0.000304
6554	-0.000349
6555	-0.000313
6556	-0.000304
6557	-0.000293
6558	-0.000251
6559	-0.000248
6560	-0.000246
6561	-0.00022
6562	-0.000323
6563	-0.000415
6564	-0.000422
6565	-0.000351
6566	-0.000263
6567	-0.00022
6568	-0.000269
6569	-0.000302
6570	-0.000259
6571	-0.000274
6572	-0.000333
6573	-0.00041
6574	-0.000417
6575	-0.000341
6576	-0.000285
6577	-0.000327
6578	-0.000358
6579	-0.000351
6580	-0.000303
6581	-0.000266
6582	-0.000271
6583	-0.000242
6584	-0.000202
6585	-0.000223
6586	-0.000236
6587	-0.000155
6588	-0.000101
6589	-0.000101
6590	-0.000122
6591	-0.000128
6592	-0.000133
6593	-0.000136
6594	-6e-05
6595	-9.5e-05
6596	-0.000196
6597	-8.4e-05
6598	6e-06
6599	-4.3e-05
6600	9e-06
6601	-2.8e-05
6602	-4.3e-05
6603	2.4e-05
6604	9e-05
6605	-2e-06
6606	-8.7e-05
6607	-0.000148
6608	-0.000127
6609	-9.8e-05
6610	-8.4e-05
6611	-4e-06
6612	-0.000105
6613	-0.000134
6614	-5.9e-05
6615	7.1e-05
6616	4.2e-05
6617	-3.4e-05
6618	-6.8e-05
6619	-7.9e-05
6620	-2.7e-05
6621	-5.4e-05
6622	-0.000195
6623	-0.000145
6624	-9.6e-05
6625	-1.2e-05
6626	3e-05
6627	3.8e-05
6628	4.2e-05
6629	-3.9e-05
6630	-0.000158
6631	-0.000188
6632	-0.000289
6633	-0.000288
6634	-0.000139
6635	-4.7e-05
6636	-7.7e-05
6637	-0.000188
6638	-0.000229
6639	-0.000189
6640	-0.000296
6641	-0.00034
6642	-0.000396
6643	-0.000306
6644	-0.0003
6645	-0.000275
6646	-0.000249
6647	-0.000261
6648	-0.000207
6649	-0.000198
6650	-0.000143
6651	-3.4e-05
6652	-1e-06
6653	-4.9e-05
6654	-0.000112
6655	-7.1e-05
6656	-6.7e-05
6657	-3.2e-05
6658	1.8e-05
6659	-2.8e-05
6660	-0.000106
6661	-0.000111
6662	-7e-05
6663	1.5e-05
6664	2e-06
6665	-3.6e-05
6666	-8e-05
6667	-0.000112
6668	-0.000109
6669	-0.000121
6670	-0.000119
6671	-9.9e-05
6672	-6.1e-05
6673	-1.1e-05
6674	-1.7e-05
6675	-2.4e-05
6676	-2e-05
6677	-3.8e-05
6678	-4.6e-05
6679	-3.3e-05
6680	-3.9e-05
6681	-2.6e-05
6682	-0.000129
6683	-0.000202
6684	-0.000211
6685	-0.000195
6686	-0.000235
6687	-0.000234
6688	-0.000271
6689	-0.00023
6690	-0.00018
6691	-0.000114
6692	-5.6e-05
6693	-2e-05
6694	-2.5e-05
6695	-6e-05
6696	-5.6e-05
6697	-4e-05
6698	-7.5e-05
6699	-0.000207
6700	-0.000145
6701	-0.000127
6702	-0.000172
6703	-0.000194
6704	-0.000135
6705	-0.000138
6706	-0.000155
6707	-0.000218
6708	-0.000254
6709	-0.000243
6710	-0.000196
6711	-0.000156
6712	-0.000208
6713	-0.00031
6714	-0.000319
6715	-0.000365
6716	-0.000298
6717	-0.000311
6718	-0.000383
6719	-0.000384
6720	-0.000233
6721	-0.000188
6722	-0.000249
6723	-0.00021
6724	-0.00023
6725	-0.000291
6726	-0.000252
6727	-0.000283
6728	-0.000287
6729	-0.000217
6730	-0.000145
6731	-0.000163
6732	-0.00011
6733	-0.000108
6734	-9.7e-05
6735	-0.000116
6736	-7.8e-05
6737	-7.2e-05
6738	-5.7e-05
6739	-7.8e-05
6740	-0.000154
6741	-0.000181
6742	-0.000197
6743	-8.5e-05
6744	1.9e-05
6745	-8.6e-05
6746	-0.0002
6747	-0.000148
6748	-0.000155
6749	-0.00021
6750	-0.000226
6751	-0.000231
6752	-0.000241
6753	-0.000183
6754	-0.000111
6755	-9.2e-05
6756	-0.00013
6757	-0.000136
6758	-0.000169
6759	-0.000233
6760	-0.000273
6761	-0.000254
6762	-0.000258
6763	-0.000181
6764	-0.000183
6765	-0.000214
6766	-0.000275
6767	-0.000282
6768	-0.00027
6769	-0.000271
6770	-0.000148
6771	-6e-06
6772	3.1e-05
6773	3.9e-05
6774	3.9e-05
6775	-6.6e-05
6776	-5.4e-05
6777	-4.3e-05
6778	-0.000149
6779	-0.000199
6780	-0.000172
6781	-0.000102
6782	-7.3e-05
6783	-0.000184
6784	-0.000254
6785	-0.0002
6786	-0.000174
6787	-0.000158
6788	-0.000198
6789	-0.000265
6790	-0.000344
6791	-0.000322
6792	-0.000334
6793	-0.000344
6794	-0.00036
6795	-0.00033
6796	-0.000292
6797	-0.000339
6798	-0.000446
6799	-0.000503
6800	-0.000475
6801	-0.000503
6802	-0.0006
6803	-0.000581
6804	-0.000598
6805	-0.000513
6806	-0.000492
6807	-0.000491
6808	-0.000441
6809	-0.000451
6810	-0.000521
6811	-0.000506
6812	-0.000529
6813	-0.000564
6814	-0.000573
6815	-0.000517
6816	-0.000443
6817	-0.000385
6818	-0.000456
6819	-0.000527
6820	-0.000623
6821	-0.000569
6822	-0.000488
6823	-0.000508
6824	-0.00064
6825	-0.000666
6826	-0.000586
6827	-0.000606
6828	-0.00068
6829	-0.000665
6830	-0.000556
6831	-0.00049
6832	-0.000436
6833	-0.000427
6834	-0.00039
6835	-0.000457
6836	-0.000501
6837	-0.000541
6838	-0.000462
6839	-0.000445
6840	-0.00042
6841	-0.000449
6842	-0.000538
6843	-0.00056
6844	-0.000425
6845	-0.000336
6846	-0.000327
6847	-0.000404
6848	-0.000444
6849	-0.000447
6850	-0.000361
6851	-0.000328
6852	-0.000393
6853	-0.00036
6854	-0.000191
6855	-8.8e-05
6856	-9.5e-05
6857	-0.000163
6858	-0.000164
6859	-0.000221
6860	-0.000346
6861	-0.00044
6862	-0.00042
6863	-0.000407
6864	-0.000441
6865	-0.000465
6866	-0.000431
6867	-0.000406
6868	-0.000407
6869	-0.000424
6870	-0.000394
6871	-0.000458
6872	-0.000404
6873	-0.000382
6874	-0.000367
6875	-0.000352
6876	-0.000368
6877	-0.000392
6878	-0.000443
6879	-0.000468
6880	-0.000357
6881	-0.000281
6882	-0.000282
6883	-0.000237
6884	-0.000204
6885	-0.000207
6886	-0.000132
6887	-2.9e-05
6888	-1.7e-05
6889	-0.000109
6890	-0.000146
6891	-0.000119
6892	-0.000143
6893	-0.000141
6894	-8.7e-05
6895	-4.4e-05
6896	-0.000111
6897	-0.000127
6898	-8.8e-05
6899	-0.000108
6900	-7.5e-05
6901	7.2e-05
6902	8.7e-05
6903	2.2e-05
6904	-4.9e-05
6905	-3.4e-05
6906	-4.8e-05
6907	-7e-05
6908	-0.000105
6909	-8.8e-05
6910	1.4e-05
6911	5.1e-05
6912	0.000127
6913	3e-06
6914	-0.000102
6915	-0.000137
6916	-6.9e-05
6917	-4.7e-05
6918	1.8e-05
6919	4e-05
6920	-1.9e-05
6921	-6.8e-05
6922	-4.2e-05
6923	-7e-06
6924	-1.1e-05
6925	-4.1e-05
6926	-0.000101
6927	-0.000116
6928	-0.000153
6929	-0.000231
6930	-0.00024
6931	-0.000212
6932	-0.000133
6933	-0.000111
6934	-7.9e-05
6935	-9.8e-05
6936	-0.000168
6937	-0.000162
6938	-0.000127
6939	-0.000157
6940	-0.000162
6941	-0.000111
6942	-0.000184
6943	-0.00024
6944	-0.000242
6945	-0.000315
6946	-0.000343
6947	-0.000237
6948	-0.000165
6949	-0.000221
6950	-0.000276
6951	-0.000258
6952	-0.00026
6953	-0.000283
6954	-0.00024
6955	-0.000194
6956	-0.000194
6957	-0.000164
6958	-0.000204
6959	-0.000253
6960	-0.00025
6961	-0.000156
6962	-4.5e-05
6963	-9.7e-05
6964	-0.000188
6965	-0.000227
6966	-0.000233
6967	-0.000258
6968	-0.000242
6969	-0.000195
6970	-0.000195
6971	-0.000202
6972	-0.000104
6973	-8.9e-05
6974	-0.000159
6975	-4.3e-05
6976	7.2e-05
6977	4.2e-05
6978	1.1e-05
6979	-4.8e-05
6980	-6.7e-05
6981	1.1e-05
6982	5.6e-05
6983	-2e-06
6984	-9.7e-05
6985	-0.000122
6986	-0.000133
6987	-0.000178
6988	-0.000119
6989	-6.8e-05
6990	-0.00011
6991	-0.000124
6992	-4.8e-05
6993	1.9e-05
6994	-3.6e-05
6995	-0.000107
6996	-0.000136
6997	-7.9e-05
6998	-7.9e-05
6999	-9e-06
7000	4.7e-05
7001	6e-06
7002	-4.4e-05
7003	-3.8e-05
7004	-3.4e-05
7005	-5.9e-05
7006	-3.7e-05
7007	0
7008	-2.7e-05
7009	-0.000136
7010	-0.000219
7011	-0.000195
7012	-4.8e-05
7013	-2.7e-05
7014	-8.6e-05
7015	-3.2e-05
7016	-5.8e-05
7017	-0.000103
7018	-0.000204
7019	-0.000158
7020	-0.000194
7021	-0.000233
7022	-0.000225
7023	-0.000218
7024	-0.000305
7025	-0.000247
7026	-0.000168
7027	-0.000196
7028	-0.000266
7029	-0.000205
7030	-0.000159
7031	-0.000203
7032	-0.000234
7033	-0.000264
7034	-0.00025
7035	-0.000255
7036	-0.000199
7037	-0.000162
7038	-0.000112
7039	-6.7e-05
7040	-0.000116
7041	-0.00017
7042	-0.000198
7043	-0.000172
7044	-0.0001
7045	-2.9e-05
7046	-1.2e-05
7047	-6.6e-05
7048	-3.7e-05
7049	-1.6e-05
7050	1.2e-05
7051	-8.4e-05
7052	-0.00012
7053	-8.9e-05
7054	-3.4e-05
7055	-3.1e-05
7056	-2.9e-05
7057	3e-06
7058	-9.2e-05
7059	-9.3e-05
7060	-0.000103
7061	-0.000107
7062	-5.7e-05
7063	3.1e-05
7064	0.000118
7065	0.000147
7066	0.000158
7067	0.000187
7068	0.000211
7069	0.000133
7070	9.7e-05
7071	9.5e-05
7072	0.000168
7073	0.000265
7074	0.000267
7075	0.000217
7076	0.000187
7077	0.000131
7078	0.000138
7079	0.000217
7080	0.00018
7081	5.1e-05
7082	-1.7e-05
7083	7.6e-05
7084	4.5e-05
7085	2.7e-05
7086	8.6e-05
7087	0.000132
7088	5.7e-05
7089	5.8e-05
7090	0.000136
7091	0.000118
7092	-9e-06
7093	-4e-05
7094	2.5e-05
7095	8.8e-05
7096	9.8e-05
7097	6.2e-05
7098	8.9e-05
7099	8.9e-05
7100	8.9e-05
7101	0.000102
7102	0.000161
7103	0.000111
7104	6.8e-05
7105	6.2e-05
7106	0.000111
7107	0.000162
7108	0.000138
7109	0.000117
7110	0.000105
7111	7.1e-05
7112	-2e-05
7113	-3.8e-05
7114	3e-06
7115	7.2e-05
7116	0.000126
7117	0.000207
7118	0.000134
7119	1.7e-05
7120	-6.6e-05
7121	-8e-05
7122	-0.000111
7123	-0.000109
7124	-0.000215
7125	-0.000274
7126	-0.000228
7127	-0.000151
7128	-0.00014
7129	-0.000147
7130	-0.000163
7131	-0.000129
7132	-0.000142
7133	-0.000121
7134	-0.000121
7135	-0.000174
7136	-0.000122
7137	-9.3e-05
7138	-0.000106
7139	-0.0001
7140	-0.00012
7141	-0.000157
7142	-0.000149
7143	-5.9e-05
7144	-1.2e-05
7145	-0.000103
7146	-0.000155
7147	-0.00012
7148	-4.2e-05
7149	-5.2e-05
7150	-0.000119
7151	-0.000223
7152	-0.00021
7153	-0.000135
7154	-0.000153
7155	-0.000207
7156	-0.00021
7157	-0.00013
7158	-0.000213
7159	-0.000309
7160	-0.000276
7161	-0.000213
7162	-0.000237
7163	-0.00032
7164	-0.000412
7165	-0.000408
7166	-0.000312
7167	-0.000157
7168	-0.000118
7169	-7.1e-05
7170	-0.000149
7171	-0.000204
7172	-0.000157
7173	-5.7e-05
7174	-4.7e-05
7175	-0.000118
7176	-0.00021
7177	-0.000183
7178	-0.000223
7179	-0.000195
7180	-0.000138
7181	-0.000123
7182	-0.000133
7183	-0.000106
7184	-9.5e-05
7185	-6.7e-05
7186	-0.000128
7187	-0.000177
7188	-0.000213
7189	-0.000149
7190	-1.2e-05
7191	3.2e-05
7192	-7.1e-05
7193	-3.9e-05
7194	5.3e-05
7195	2.5e-05
7196	2.5e-05
7197	-7.8e-05
7198	-0.000116
7199	-7.5e-05
7200	4e-06
7201	7.6e-05
7202	0.000122
7203	9.7e-05
7204	0.000126
7205	0.000164
7206	0.000194
7207	9.4e-05
7208	5.8e-05
7209	1.3e-05
7210	2.7e-05
7211	6.5e-05
7212	4e-05
7213	-1.5e-05
7214	-4.4e-05
7215	4.4e-05
7216	8.9e-05
7217	5.5e-05
7218	2.5e-05
7219	4e-06
7220	-1.1e-05
7221	-1e-05
7222	-4.9e-05
7223	-8.4e-05
7224	-9.4e-05
7225	-2.5e-05
7226	-3e-06
7227	-2.9e-05
7228	-0.000117
7229	-0.00013
7230	-4.8e-05
7231	7.9e-05
7232	0.000193
7233	0.000227
7234	9.6e-05
7235	6.8e-05
7236	3.7e-05
7237	4.2e-05
7238	7.1e-05
7239	9.7e-05
7240	-3.1e-05
7241	-0.000133
7242	-5.9e-05
7243	-8e-05
7244	-8.9e-05
7245	-0.000117
7246	-0.00015
7247	-0.00019
7248	-0.000187
7249	-0.000172
7250	-0.000206
7251	-0.000205
7252	-0.00021
7253	-0.000236
7254	-0.000177
7255	-0.000166
7256	-0.000168
7257	-0.000119
7258	-6.9e-05
7259	-7.4e-05
7260	-0.000171
7261	-0.000169
7262	-4.7e-05
7263	1e-06
7264	-4.9e-05
7265	-0.000107
7266	5e-06
7267	7.1e-05
7268	7.8e-05
7269	4.1e-05
7270	6e-06
7271	4e-05
7272	-3.4e-05
7273	-3.7e-05
7274	-1.9e-05
7275	6.6e-05
7276	3.6e-05
7277	2e-06
7278	1.6e-05
7279	-5.1e-05
7280	-0.000113
7281	-0.000148
7282	-0.000168
7283	-0.000146
7284	-5.5e-05
7285	-6.9e-05
7286	-9.2e-05
7287	-0.000135
7288	-7.9e-05
7289	-4.2e-05
7290	3.7e-05
7291	1e-06
7292	-4.4e-05
7293	-6.1e-05
7294	-2.8e-05
7295	-5.7e-05
7296	-2.3e-05
7297	-4.7e-05
7298	-6.8e-05
7299	-6e-05
7300	-2.8e-05
7301	-2.1e-05
7302	-0.000119
7303	-0.000206
7304	-0.000159
7305	-7.5e-05
7306	-0.000111
7307	-0.00012
7308	-8.4e-05
7309	-5.5e-05
7310	-5.4e-05
7311	-3.1e-05
7312	-3.8e-05
7313	-2.7e-05
7314	-5.3e-05
7315	-0.000151
7316	-0.000232
7317	-0.000121
7318	-8e-05
7319	-7.6e-05
7320	-7.2e-05
7321	-8.8e-05
7322	-0.000103
7323	-8.5e-05
7324	-2.9e-05
7325	-4.2e-05
7326	-0.000209
7327	-0.000254
7328	-0.000188
7329	-0.00012
7330	-0.000154
7331	-0.000136
7332	-0.000165
7333	-0.00015
7334	-0.000173
7335	-0.000251
7336	-0.000384
7337	-0.00042
7338	-0.000319
7339	-0.000234
7340	-0.000235
7341	-0.000318
7342	-0.000339
7343	-0.000274
7344	-0.000227
7345	-0.000296
7346	-0.000371
7347	-0.000325
7348	-0.000259
7349	-0.000238
7350	-0.000219
7351	-0.000212
7352	-0.000219
7353	-0.00019
7354	-0.000143
7355	-8.2e-05
7356	-0.000218
7357	-0.000303
7358	-0.00022
7359	-0.000136
7360	-0.000148
7361	-0.000169
7362	-9.5e-05
7363	1e-05
7364	1.6e-05
7365	-3.7e-05
7366	-0.000109
7367	-0.00027
7368	-0.000321
7369	-0.000217
7370	-0.000105
7371	-9e-05
7372	-9.3e-05
7373	-0.000179
7374	-0.000274
7375	-0.000222
7376	-0.00022
7377	-0.000295
7378	-0.000367
7379	-0.000365
7380	-0.000349
7381	-0.000267
7382	-0.000257
7383	-0.000311
7384	-0.000352
7385	-0.000281
7386	-0.000276
7387	-0.000277
7388	-0.000355
7389	-0.000312
7390	-0.000261
7391	-0.000218
7392	-0.000145
7393	-0.000115
7394	-0.000136
7395	-7e-05
7396	-3.5e-05
7397	-8.9e-05
7398	-6.5e-05
7399	-9.2e-05
7400	-0.000159
7401	-0.000196
7402	-8.6e-05
7403	-2.7e-05
7404	-6.1e-05
7405	-9e-05
7406	-8e-05
7407	-0.000108
7408	-7.9e-05
7409	-9.8e-05
7410	-0.000135
7411	-3.2e-05
7412	4.6e-05
7413	1.3e-05
7414	-6e-06
7415	-3.1e-05
7416	-5e-06
7417	1.7e-05
7418	3.1e-05
7419	5.6e-05
7420	8.6e-05
7421	8e-06
7422	-0.000108
7423	-9.3e-05
7424	-5.3e-05
7425	-7.3e-05
7426	-5e-06
7427	8.4e-05
7428	9e-05
7429	4.2e-05
7430	-1.4e-05
7431	-2.2e-05
7432	3e-05
7433	0.000102
7434	8.3e-05
7435	0.000111
7436	0.000144
7437	9.3e-05
7438	-2e-06
7439	2.3e-05
7440	8.6e-05
7441	3.8e-05
7442	-7e-06
7443	-4e-06
7444	9.2e-05
7445	0.000154
7446	0.000112
7447	2e-05
7448	1.3e-05
7449	-8.7e-05
7450	-9.1e-05
7451	-8.9e-05
7452	-0.000114
7453	-0.000191
7454	-0.000262
7455	-0.000193
7456	-0.000156
7457	-0.000158
7458	-0.000141
7459	-4e-05
7460	2e-06
7461	-2.9e-05
7462	-0.000124
7463	-7.8e-05
7464	-4e-06
7465	2.1e-05
7466	-2e-05
7467	-4.4e-05
7468	-7.7e-05
7469	-0.000123
7470	-0.000158
7471	-0.000135
7472	-0.000159
7473	-0.000154
7474	-0.000123
7475	-0.000141
7476	-0.000172
7477	-0.000219
7478	-0.000213
7479	-0.000241
7480	-0.000226
7481	-0.000195
7482	-0.000196
7483	-0.000263
7484	-0.000373
7485	-0.000332
7486	-0.000186
7487	-1.3e-05
7488	2.8e-05
7489	-4e-06
7490	-6.9e-05
7491	-3.4e-05
7492	-2.9e-05
7493	-5e-05
7494	-0.00013
7495	-0.000185
7496	-0.000201
7497	-0.000205
7498	-0.000119
7499	1.2e-05
7500	0.000117
7501	5.4e-05
7502	-3.7e-05
7503	-7e-05
7504	-5.2e-05
7505	-0.000224
7506	-0.000271
7507	-0.000183
7508	-0.000132
7509	-6.1e-05
7510	6e-06
7511	-7e-06
7512	-2.2e-05
7513	-5e-06
7514	7.4e-05
7515	0.000127
7516	6.5e-05
7517	5.8e-05
7518	2.5e-05
7519	2.8e-05
7520	-6.6e-05
7521	-2.7e-05
7522	-4e-06
7523	-6.4e-05
7524	-5.5e-05
7525	4e-06
7526	6.2e-05
7527	0.000137
7528	7.6e-05
7529	3.5e-05
7530	0
7531	5e-06
7532	7e-06
7533	-1.8e-05
7534	-6e-06
7535	5.1e-05
7536	0.000137
7537	0.000129
7538	0.000161
7539	0.000151
7540	0.000155
7541	0.000244
7542	0.000222
7543	0.000164
7544	0.000135
7545	0.000119
7546	0.000192
7547	0.000148
7548	5.4e-05
7549	0.000157
7550	0.000169
7551	0.000135
7552	0.000132
7553	0.000122
7554	0.000172
7555	0.000227
7556	0.000192
7557	0.000218
7558	0.000167
7559	0.000162
7560	0.000163
7561	0.000163
7562	0.000152
7563	0.000171
7564	0.000154
7565	0.000203
7566	0.000289
7567	0.000318
7568	0.000301
7569	0.000295
7570	0.000362
7571	0.00034
7572	0.000327
7573	0.000357
7574	0.000328
7575	0.000317
7576	0.000347
7577	0.000356
7578	0.000381
7579	0.000434
7580	0.000377
7581	0.00039
7582	0.000401
7583	0.0004
7584	0.00028
7585	0.000255
7586	0.000285
7587	0.00034
7588	0.000394
7589	0.00043
7590	0.000418
7591	0.00039
7592	0.000381
7593	0.000504
7594	0.000567
7595	0.000503
7596	0.000417
7597	0.000415
7598	0.000334
7599	0.000311
7600	0.00026
7601	0.000256
7602	0.000218
7603	0.000219
7604	0.000344
7605	0.000315
7606	0.000209
7607	0.000275
7608	0.000372
7609	0.000336
7610	0.000327
7611	0.000264
7612	0.0002
7613	0.000235
7614	0.000281
7615	0.000267
7616	0.000264
7617	0.000189
7618	8.6e-05
7619	8.9e-05
7620	0.000168
7621	0.00019
7622	0.000109
7623	5.1e-05
7624	6e-05
7625	2.5e-05
7626	-3.5e-05
7627	-9e-06
7628	8.8e-05
7629	9.8e-05
7630	0.000176
7631	0.00027
7632	0.000291
7633	0.000162
7634	9.1e-05
7635	7.2e-05
7636	1.8e-05
7637	7.5e-05
7638	0.000212
7639	0.000201
7640	0.000124
7641	0.000155
7642	0.000291
7643	0.000268
7644	0.000194
7645	0.000164
7646	0.000174
7647	0.000244
7648	0.000268
7649	0.000247
7650	0.000226
7651	0.000281
7652	0.000235
7653	0.000152
7654	2.9e-05
7655	-1.5e-05
7656	4.2e-05
7657	0.000188
7658	0.000225
7659	0.000228
7660	0.000204
7661	0.000167
7662	9.6e-05
7663	3.7e-05
7664	9.2e-05
7665	0.000105
7666	4.1e-05
7667	4e-05
7668	0.000149
7669	0.000239
7670	0.000225
7671	0.000237
7672	0.000247
7673	0.000228
7674	0.000282
7675	0.000288
7676	0.000234
7677	0.00012
7678	0.000123
7679	0.000154
7680	0.000266
7681	0.000324
7682	0.000386
7683	0.00038
7684	0.000372
7685	0.000412
7686	0.000357
7687	0.000283
7688	0.000274
7689	0.000293
7690	0.000301
7691	0.00026
7692	0.000249
7693	0.000225
7694	0.000218
7695	0.000246
7696	0.000319
7697	0.000346
7698	0.000292
7699	0.000181
7700	0.00013
7701	0.000165
7702	0.000213
7703	0.000222
7704	0.00027
7705	0.000261
7706	0.000188
7707	0.000188
7708	0.000238
7709	0.000253
7710	0.000213
7711	0.00023
7712	0.000211
7713	9.4e-05
7714	5.4e-05
7715	0.000114
7716	0.000174
7717	0.000188
7718	0.00019
7719	0.000245
7720	0.000273
7721	0.000267
7722	0.00033
7723	0.00036
7724	0.00038
7725	0.00042
7726	0.000474
7727	0.000429
7728	0.000424
7729	0.000495
7730	0.000429
7731	0.000339
7732	0.000324
7733	0.000378
7734	0.000386
7735	0.000321
7736	0.000326
7737	0.000285
7738	0.000219
7739	0.000135
7740	0.000196
7741	0.000269
7742	0.000246
7743	9.7e-05
7744	5.5e-05
7745	5.6e-05
7746	8.6e-05
7747	5.6e-05
7748	5.7e-05
7749	7.7e-05
7750	0.000145
7751	0.000185
7752	0.000177
7753	5.8e-05
7754	4e-05
7755	8.5e-05
7756	0.000165
7757	0.000164
7758	0.000117
7759	1e-05
7760	4.7e-05
7761	0.000104
7762	0.000149
7763	0.000144
7764	0.00018
7765	0.00026
7766	0.00027
7767	0.000186
7768	0.000184
7769	0.000195
7770	9.1e-05
7771	4.2e-05
7772	9e-06
7773	0.000123
7774	0.000169
7775	0.000129
7776	1.6e-05
7777	2.9e-05
7778	0.000122
7779	0.000155
7780	7.3e-05
7781	4.7e-05
7782	-2.6e-05
7783	-5.9e-05
7784	5e-06
7785	2.6e-05
7786	-0.00013
7787	-0.000201
7788	-0.000147
7789	-0.000121
7790	-0.000112
7791	-0.000143
7792	-0.000163
7793	-0.000177
7794	-0.000191
7795	-0.000193
7796	-0.000153
7797	-0.00011
7798	-0.000111
7799	-9.8e-05
7800	4e-06
7801	5.2e-05
7802	3e-05
7803	-4.6e-05
7804	-6.1e-05
7805	-0.000134
7806	-0.000145
7807	-0.000155
7808	-0.000217
7809	-0.000201
7810	-0.000188
7811	-0.00019
7812	-0.000267
7813	-0.000282
7814	-0.000316
7815	-0.000303
7816	-0.000258
7817	-0.000269
7818	-0.000323
7819	-0.000348
7820	-0.000309
7821	-0.000373
7822	-0.000407
7823	-0.000213
7824	-9.1e-05
7825	-0.000145
7826	-0.000262
7827	-0.000328
7828	-0.000397
7829	-0.000348
7830	-0.000346
7831	-0.000407
7832	-0.000291
7833	-0.000265
7834	-0.000278
7835	-0.000279
7836	-0.000373
7837	-0.000432
7838	-0.000463
7839	-0.000468
7840	-0.00035
7841	-0.000224
7842	-0.000209
7843	-0.000231
7844	-0.000199
7845	-0.000109
7846	-8.1e-05
7847	-0.000174
7848	-0.00035
7849	-0.000446
7850	-0.000368
7851	-0.000337
7852	-0.000327
7853	-0.000312
7854	-0.000341
7855	-0.000333
7856	-0.000276
7857	-0.000334
7858	-0.000421
7859	-0.000439
7860	-0.000355
7861	-0.000352
7862	-0.000448
7863	-0.000501
7864	-0.000403
7865	-0.000262
7866	-0.000289
7867	-0.000285
7868	-0.00023
7869	-0.000319
7870	-0.000401
7871	-0.000373
7872	-0.000307
7873	-0.000266
7874	-0.000258
7875	-0.000213
7876	-0.000223
7877	-0.000251
7878	-0.00026
7879	-0.00028
7880	-0.000325
7881	-0.000282
7882	-0.000233
7883	-0.00016
7884	-0.000181
7885	-0.000169
7886	-0.000116
7887	4.1e-05
7888	0.000112
7889	0.00012
7890	6.7e-05
7891	1e-06
7892	-2.3e-05
7893	-2.5e-05
7894	-1e-06
7895	-7.6e-05
7896	-5.1e-05
7897	-4.1e-05
7898	6e-06
7899	-1.5e-05
7900	-8.2e-05
7901	-8.5e-05
7902	-5e-05
7903	-6.6e-05
7904	-3.8e-05
7905	-7.7e-05
7906	-8.7e-05
7907	-0.000122
7908	-8.6e-05
7909	-6.5e-05
7910	-1.3e-05
7911	-1e-06
7912	-4e-06
7913	-7.1e-05
7914	-0.000109
7915	-0.000145
7916	-0.000151
7917	-7.2e-05
7918	-6.9e-05
7919	-0.000144
7920	-0.000191
7921	-0.000221
7922	-0.000188
7923	-9.2e-05
7924	-6.8e-05
7925	-0.0001
7926	-9.1e-05
7927	-2.7e-05
7928	-3e-05
7929	-4.2e-05
7930	-2.7e-05
7931	-9.8e-05
7932	-0.000223
7933	-0.000203
7934	-5.3e-05
7935	-1e-05
7936	-0.00014
7937	-0.00018
7938	-0.000208
7939	-0.000194
7940	-0.000162
7941	-0.000193
7942	-0.000185
7943	-0.000143
7944	-0.000141
7945	-0.000131
7946	-0.00017
7947	-0.000288
7948	-0.000316
7949	-0.000259
7950	-0.000302
7951	-0.000306
7952	-0.000229
7953	-0.00029
7954	-0.000448
7955	-0.000464
7956	-0.000476
7957	-0.000502
7958	-0.000521
7959	-0.00041
7960	-0.000371
7961	-0.000319
7962	-0.000359
7963	-0.000379
7964	-0.000425
7965	-0.000401
7966	-0.000343
7967	-0.000329
7968	-0.000356
7969	-0.000489
7970	-0.000541
7971	-0.00055
7972	-0.000469
7973	-0.000479
7974	-0.000532
7975	-0.000571
7976	-0.000538
7977	-0.000499
7978	-0.000562
7979	-0.00051
7980	-0.000455
7981	-0.000455
7982	-0.00038
7983	-0.00027
7984	-0.000215
7985	-0.000235
7986	-0.000315
7987	-0.000381
7988	-0.000405
7989	-0.000455
7990	-0.000523
7991	-0.000515
7992	-0.000549
7993	-0.000497
7994	-0.000449
7995	-0.000412
7996	-0.000385
7997	-0.000413
7998	-0.000398
[truncated: 2,734 more rows]

[truncated: 2 more sheets: V334dC 0.45 M, V334dC 0.15 M]
