# Supplementary material for: Homo-oligomerization of the human adenosine A2A receptor is driven by the intrinsically disordered C-terminus
Source: eLife. 2021 Jul 16;10:e66662. doi: 10.7554/eLife.66662 (PMC8328514; doi:10.7554/eLife.66662)
Supplement: Figure 6—figure supplement 1—source data 1. — (A) Hydropathy plot against A2AR residue number showing the hydrophobicity of A2AR. C-terminus, scored with ProtScale using method described by Kyte and Doolittle, window size of 3. Positive scores represent hydrophobicity and negative scores hydrophilicity. (C) Average number of residues that form non-polar contacts as a function of sequence length of A2AR. [file elife-66662-fig6-figsupp1-data1.xlsx]

## Sheet: Fig. 6 - Fig. Suppl. 1A
MIN: -4.167, MAX: 3.267
Sequence: PFKAAGTSARVLAAHGSDGEQVSLRLNGHPPGVWANGSAPHPERRPNGYALGLVSGGSAQESQGNTGLPDVELLSHELKGVCPEPPGLDDPLAQDGAGVS
Scale: Hydropathicity.
Window size: 3
Scale not normalized.
Relative weight for window edges: 100 %
Weight variation model: linear
Position: 2 Score: -0.900
Position: 3 Score: 0.233
Position: 4 Score: -0.100
Position: 5 Score: 1.067
Position: 6 Score: 0.233
Position: 7 Score: -0.633
Position: 8 Score: 0.100
Position: 9 Score: -1.167
Position: 10 Score: 0.500
Position: 11 Score: 1.167
Position: 12 Score: 3.267 (max)
Position: 13 Score: 2.467
Position: 14 Score: 0.133
Position: 15 Score: -0.600
Position: 16 Score: -1.467
Position: 17 Score: -1.567
Position: 18 Score: -1.567
Position: 19 Score: -2.467
Position: 20 Score: -2.467
Position: 21 Score: -0.933
Position: 22 Score: -0.033
Position: 23 Score: 2.400
Position: 24 Score: -0.500
Position: 25 Score: 1.033
Position: 26 Score: -1.400
Position: 27 Score: -0.033
Position: 28 Score: -2.367
Position: 29 Score: -1.733
Position: 30 Score: -2.133
Position: 31 Score: -1.200
Position: 32 Score: 0.733
Position: 33 Score: 0.967
Position: 34 Score: 1.700
Position: 35 Score: -0.867
Position: 36 Score: -0.700
Position: 37 Score: -1.567
Position: 38 Score: 0.200
Position: 39 Score: -0.200
Position: 40 Score: -1.000
Position: 41 Score: -2.133
Position: 42 Score: -2.767
Position: 43 Score: -3.200
Position: 44 Score: -4.167 (min)
Position: 45 Score: -3.533
Position: 46 Score: -3.200
Position: 47 Score: -1.833
Position: 48 Score: -1.733
Position: 49 Score: 0.033
Position: 50 Score: 1.433
Position: 51 Score: 1.733
Position: 52 Score: 2.400
Position: 53 Score: 2.533
Position: 54 Score: 2.400
Position: 55 Score: 1.000
Position: 56 Score: -0.533
Position: 57 Score: -0.533
Position: 58 Score: 0.200
Position: 59 Score: -0.833
Position: 60 Score: -1.733
Position: 61 Score: -2.600
Position: 62 Score: -2.600
Position: 63 Score: -1.567
Position: 64 Score: -2.467
Position: 65 Score: -1.533
Position: 66 Score: -1.533
Position: 67 Score: 0.900
Position: 68 Score: 0.600
Position: 69 Score: -0.433
Position: 70 Score: -0.300
Position: 71 Score: -0.933
Position: 72 Score: 1.500
Position: 73 Score: 1.367
Position: 74 Score: 2.267
Position: 75 Score: -0.067
Position: 76 Score: -2.500
Position: 77 Score: -0.967
Position: 78 Score: -1.200
Position: 79 Score: -0.167
Position: 80 Score: -0.033
Position: 81 Score: 2.100
Position: 82 Score: 1.700
Position: 83 Score: -0.867
Position: 84 Score: -2.233
Position: 85 Score: -2.233
Position: 86 Score: -1.200
Position: 87 Score: 0.600
Position: 88 Score: -0.033
Position: 89 Score: -1.067
Position: 90 Score: -2.867
Position: 91 Score: -0.433
Position: 92 Score: 1.333
Position: 93 Score: 0.700
Position: 94 Score: -1.733
Position: 95 Score: -2.467
Position: 96 Score: -0.700
Position: 97 Score: 0.333
Position: 98 Score: 1.867
Position: 99 Score: 1.000

## Sheet: Fig. 6 - Fig. Suppl. 1C
Truncation	Res ID 291-334	Res ID 335-394
394	23	37
359	22	18
354	21	18
334	26	0
316	15	0
