# Supplementary material for: Homo-oligomerization of the human adenosine A2A receptor is driven by the intrinsically disordered C-terminus
Source: eLife. 2021 Jul 16;10:e66662. doi: 10.7554/eLife.66662 (PMC8328514; doi:10.7554/eLife.66662)
Supplement: Figure 6—source data 1. — (A) Absorbance at 450 nm of the A2AR C-terminus in solution, with NaCl and GdnHCl concentrations varied to achieve ionic strengths 0–4 M. (B) SYPRO orange fluorescence of solutions containing the A2AR C-terminus as the temperature was varied from 20°C to 70°C (gray). The change in fluorescence, measured in relative fluorescence unit (RFU), was calculated by taking the first derivative of the fluorescence values. [file elife-66662-fig6-data1.xlsx]

## Sheet: Figure 6A
NaCl Concentration (M)	0.1	0.25	0.5	1	2	3	4
Abs 500 nm	0.432	0.578	0.55	0.409	0.932	1.32	1.588
GdnHCl Concentration (M)	0.1	4
Abs 500 nm	0.432	0.07

## Sheet: Figure 6B
File Name	20170929_143356_CT004278_VIGERS_DSF.pcrd
Created By User
Notes
ID
Run Started	09/29/2017 22:34:11 UTC
Run Ended	09/30/2017 01:27:27 UTC
Sample Vol	50
Lid Temp	60
Protocol File Name	Unknown.prcl
Plate Setup File Name	DefaultPlate.pltd
Base Serial Number	CT004278
Optical Head Serial Number	785BR8160
CFX Maestro Version	4.0.2325.0418.
Well group	All Wells
Amplification step
Melt step	2
Well	Fluor	Target	Content	Sample	Cq	Starting Quantity (SQ)	Melt Temperature
C03	FAM		Unkn-13	Temperature	20	20.5	21	21.5	22	22.5	23	23.5	24	24.5	25	25.5	26	26.5	27	27.5	28	28.5	29	29.5	30	30.5	31	31.5	32	32.5	33	33.5	34	34.5	35	35.5	36	36.5	37	37.5	38	38.5	39	39.5	40	40.5	41	41.5	42
C04	FAM		Unkn-14	MES 5.3	7402	7400	7398	7396	7394	7392	7390	7383	7375	7368	7361	7355	7348	7342	7336	7331	7326	7322	7318	7315	7312	7311	7312	7315	7320	7329	7339	7352	7368	7387	7410	7435	7463	7493	7524	7555	7587	7618	7648	7677	7704	7730	7754	7776	7796
C05	FAM		Unkn-14	MES 5.3	6637	6622	6606	6591	6575	6560	6545	6531	6519	6509	6499	6491	6483	6476	6470	6465	6459	6455	6451	6446	6442	6439	6437	6435	6434	6435	6435	6436	6439	6443	6448	6455	6464	6475	6487	6502	6519	6538	6558	6581	6604	6628	6653	6678	6702
C06	FAM		Unkn-14	MES 5.3	7632	7615	7598	7581	7565	7548	7531	7517	7504	7492	7482	7473	7464	7457	7450	7444	7438	7432	7427	7422	7418	7414	7411	7409	7408	7408	7408	7410	7412	7416	7421	7428	7436	7447	7460	7476	7494	7515	7539	7566	7597	7631	7669	7709	7753
Sample average				MES pH 5.3	7223.67	7212.33	7200.67	7189.33	7178	7166.67	7155.33	7143.67	7132.67	7123	7114	7106.33	7098.33	7091.67	7085.33	7080	7074.33	7069.67	7065.33	7061	7057.33	7054.67	7053.33	7053	7054	7057.33	7060.67	7066	7073	7082	7093	7106	7121	7138.33	7157	7177.67	7200	7223.67	7248.33	7274.67	7301.67	7329.67	7358.67	7387.67	7417
(-)dRFU/dt
Well	Fluor	Target	Content	Sample
C03	FAM		Unkn-13	MES 5.3		4	4	4	4	4	4	14	16	14	14	12	14	12	12	10	10	8	8	6	6	2	-2	-6	-10	-18	-20	-26	-32	-38	-46	-50	-56	-60	-62	-62	-64	-62	-60	-58	-54	-52	-48	-44	-40
C04	FAM		Unkn-14	MES 5.3		30	32	30	32	30	30	28	24	20	20	16	16	14	12	10	12	8	8	10	8	6	4	4	2	-2	0	-2	-6	-8	-10	-14	-18	-22	-24	-30	-34	-38	-40	-46	-46	-48	-50	-50	-48
C05	FAM		Unkn-14	MES 5.3		34	34	34	32	34	34	28	26	24	20	18	18	14	14	12	12	12	10	10	8	8	6	4	2	0	0	-4	-4	-8	-10	-14	-16	-22	-26	-32	-36	-42	-48	-54	-62	-68	-76	-80	-88
Sample average				MES 5.3 avg		22.6667	23.3333	22.6667	22.6667	22.6667	22.6667	23.3333	22	19.3333	18	15.3333	16	13.3333	12.6667	10.6667	11.3333	9.33333	8.66667	8.66667	7.33333	5.33333	2.66667	0.666667	-2	-6.66667	-6.66667	-10.6667	-14	-18	-22	-26	-30	-34.6667	-37.3333	-41.3333	-44.6667	-47.3333	-49.3333	-52.6667	-54	-56	-58	-58	-58.6667
[truncated: 86 more columns]
