# Supplementary material for: Homo-oligomerization of the human adenosine A2A receptor is driven by the intrinsically disordered C-terminus
Source: eLife. 2021 Jul 16;10:e66662. doi: 10.7554/eLife.66662 (PMC8328514; doi:10.7554/eLife.66662)
Supplement: Figure 7—figure supplement 1—source data 1. [file elife-66662-fig7-figsupp1-data1.xlsx]

## Sheet: Sheet1
	316							334							354							359							394
Angle/degree	TM1	TM2	TM3	TM4	TM5	TM6		TM1	TM2	TM3	TM4	TM5	TM6		TM1	TM2	TM3	TM4	TM5	TM6		TM1	TM2	TM3	TM4	TM5	TM6		TM1	TM2	TM3	TM4	TM5	TM6
0	0	0	0	0	0	0		0	0	0	0	0	0		0	0	0	0	0	0
2	0	0.000169794	0	0.166713	9.43281e-06	0.000282992		5.39113e-06	6.06501e-05	0	0.177626	5.3911e-06	0.00118083		0	0.000125623	1.99587e-05	0.091419	0.000764415	0.00359749		0	0.000433	0	0.060295	0.000206	0.002843		0	2.35723e-06	0	0.170361	3.41797e-05	0.015718
4	0	0.00118856	0	0.209863	0.000141492	0.00140553		3.0999e-05	0.000297859	0	0.228331	4.58244e-05	0.00568575		2.7003e-05	0.00131728	0.000221894	0.134877	0.00285687	0.0120567		0	0.001647	0	0.112242	0.001038	0.010464		0	1.76792e-05	0	0.211004	0.00028876	0.0404861
6	7.54624e-05	0.00566922	1.88656e-05	0.20868	0.000386745	0.00739553		0.000214297	0.0011537	0	0.219983	0.000309989	0.019024		0.000199587	0.00646429	0.00142998	0.146847	0.0076465	0.0316032		0	0.004732	2e-05	0.157402	0.004337	0.028257		0	9.07532e-05	0	0.195507	0.00152866	0.0760751
8	0.00016979	0.0190735	0.000132059	0.170191	0.00124513	0.0243939		0.00106205	0.00551646	6.73888e-06	0.167448	0.00188554	0.0487562		0.00106251	0.0192508	0.00526206	0.131234	0.0185162	0.0631383		1.8e-05	0.012598	0.000163	0.17749	0.015107	0.059932		2.00364e-05	0.000466731	1.17862e-06	0.144192	0.00501028	0.113656
10	0.000631998	0.0474951	0.000754624	0.119886	0.00394291	0.0603528		0.00398	0.0185549	0.000117257	0.107694	0.00749633	0.0943649		0.00351508	0.038794	0.0136083	0.108499	0.0366097	0.0998769		0.000175	0.031401	0.001062	0.163229	0.039311	0.104551		0.00016147	0.00218868	3.418e-05	0.084631	0.0134786	0.139998
12	0.00384858	0.0919056	0.00231104	0.0704019	0.0119514	0.11431		0.0131436	0.0450617	0.000820796	0.0583264	0.0231063	0.142089		0.00965885	0.0618569	0.0233165	0.0903054	0.0618143	0.128324		0.001081	0.066454	0.004983	0.123256	0.082028	0.146077		0.000796742	0.00844476	0.000379516	0.0391274	0.0305319	0.145649
14	0.0139983	0.144391	0.00717836	0.0345695	0.0308641	0.166314		0.0360316	0.0853145	0.00332092	0.0265023	0.0549286	0.17311		0.0213946	0.0910977	0.0303267	0.0710571	0.0942085	0.136573		0.004215	0.113039	0.016156	0.078618	0.134424	0.166334		0.0034828	0.0233601	0.00184808	0.0158273	0.0600726	0.128893
16	0.0408063	0.187773	0.018394	0.0139521	0.0632753	0.192718		0.0761227	0.131143	0.010142	0.0100378	0.103315	0.174129		0.039658	0.127032	0.0401358	0.0580402	0.12823	0.126304		0.013802	0.158091	0.039218	0.04311	0.177164	0.158481		0.0117508	0.0503232	0.00632566	0.00685223	0.101074	0.0991599
18	0.0957807	0.197706	0.0390424	0.00432996	0.109326	0.176936		0.130867	0.167036	0.0257358	0.00314356	0.153801	0.147555		0.064975	0.157888	0.0575809	0.0513973	0.154804	0.110013		0.036569	0.184729	0.08103	0.025879	0.187992	0.131714		0.0324625	0.0864218	0.015579	0.00570915	0.141869	0.0669871
20	0.161461	0.157852	0.0723685	0.00119274	0.158292	0.132289		0.179029	0.18022	0.053256	0.000735177	0.182905	0.101291		0.0969325	0.168839	0.0822053	0.0472855	0.155892	0.0938697		0.078543	0.178934	0.134108	0.021219	0.163003	0.097415		0.0697527	0.126841	0.0343733	0.00978908	0.164544	0.0423597
22	0.203484	0.0953203	0.109336	0.000210484	0.188864	0.0749552		0.192931	0.159663	0.0956463	0.000142431	0.176516	0.0558614		0.127933	0.147108	0.108613	0.0365526	0.128647	0.0792259		0.136804	0.139337	0.180523	0.021827	0.117181	0.064922		0.119124	0.159075	0.0653463	0.0170835	0.16069	0.0301005
24	0.192542	0.0398732	0.142247	1.00231e-05	0.178233	0.0335534		0.163754	0.113467	0.142634	2.73353e-05	0.137531	0.0246356		0.150191	0.09879	0.134357	0.0216219	0.0894213	0.0590873		0.18703	0.088205	0.194833	0.020895	0.071015	0.040147		0.162822	0.165885	0.104007	0.0244319	0.132362	0.0279488
26	0.143115	0.00966881	0.164744	0	0.131512	0.0114517		0.110424	0.0606609	0.172963	2.8774e-06	0.0886055	0.0089492		0.151712	0.0505121	0.150928	0.00853596	0.0562755	0.0356178		0.202932	0.047201	0.172721	0.01683	0.03782	0.024719		0.178363	0.146691	0.137208	0.0266201	0.0912552	0.0265223
28	0.0824899	0.00149984	0.173035	0	0.0754719	0.00293369		0.0586514	0.0240067	0.172189	0	0.0441046	0.0025315		0.131271	0.0212925	0.142127	0.00200447	0.0338526	0.0152512		0.176327	0.021295	0.12344	0.010984	0.018157	0.013956		0.161893	0.107671	0.156997	0.0222374	0.0527523	0.0213094
30	0.039382	0.000339587	0.141153	0	0.0326847	0.000594284		0.0238503	0.00660951	0.14162	0	0.0180225	0.000694207		0.0940373	0.00746341	0.107049	0.000306239	0.0184763	0.00447396		0.120938	0.008949	0.069474	0.006203	0.008273	0.0071		0.123488	0.0679635	0.155402	0.0145436	0.0267993	0.0137532
32	0.0156302	7.54639e-05	0.0843764	0	0.011093	9.43307e-05		0.00758801	0.0011227	0.0983095	0	0.00572131	0.000125362		0.0581116	0.00175168	0.0624109	1.6946e-05	0.00832989	0.000899961		0.065197	0.003266	0.030024	0.002825	0.003273	0.002995		0.0784143	0.0360785	0.133104	0.00778429	0.0119759	0.00733497
34	0.00491449	0	0.0340147	0	0.00224501	1.88661e-05		0.0019125	0.000107822	0.053814	0	0.00141382	1.61757e-05		0.0297596	0.000363954	0.0278565	0	0.00284395	8.22419e-05		0.027354	0.001042	0.010666	0.001001	0.001066	0.001026		0.0383603	0.0141516	0.0956098	0.00311648	0.00427129	0.0029347
36	0.00135832	0	0.00883854	0	0.000424476	0		0.00034638	4.04334e-06	0.0218218	0	0.000257425	2.69595e-06		0.0130072	4.57878e-05	0.00958488	0	0.000685742	5.87442e-06		0.008532	0.000261	0.002746	0.000261	0.000266	0.000262		0.0139171	0.00361127	0.0546091	0.00085543	0.00109611	0.000805534
38	0.000292417	0	0.00188656	0	2.82984e-05	0		5.12157e-05	0	0.00609599	0	2.29122e-05	0		0.00478657	7.04427e-06	0.00246431	0	0.000113899	0		0.001827	6.3e-05	0.000513	6.3e-05	6.3e-05	6.3e-05		0.00406032	0.000617593	0.0257387	0.000242435	0.000282867	0.000228294
40	1.88656e-05	0	0.000160358	0	9.43281e-06	0		5.39113e-06	0	0.00132352	0	4.04333e-06	0		0.00140885	0	0.000449658	0	9.39373e-06	0		0.000296	4e-06	6.4e-05	4e-06	4e-06	4e-06		0.000945248	8.60387e-05	0.00948672	7.2856e-05	7.18953e-05	6.86064e-05
42	0	0	9.43281e-06	0	0	0		0	0	0.000168472	0	1.34778e-06	0		0.000322862	0	4.34396e-05	0	1.17422e-06	0		7.2e-05	0	3e-06	0	0	0		0.000174435	1.17861e-05	0.00307384	1.25614e-05	1.17861e-05	1.18287e-05
44	0	0	0	0	0	0		0	0	1.48255e-05	0	0	0		3.52213e-05	0	7.04425e-06	0	0	0		3e-05	0	0	0	0	0		1.06075e-05	0	0.000767282	0	0	0
46	0	0	0	0	0	0		0	0	0	0	0	0		1.17404e-06	0	1.17404e-06	0	0	0		5e-06	0	0	0	0	0		1.17861e-06	0	0.000108433	0	0	0
48	0	0	0	0	0	0		0	0	0	0	0	0		0	0	0	0	0	0		0	0	0	0	0	0		1.17861e-06	0	8.25035e-06	0	0	0
