# Supplementary material for: Homo-oligomerization of the human adenosine A2A receptor is driven by the intrinsically disordered C-terminus
Source: eLife. 2021 Jul 16;10:e66662. doi: 10.7554/eLife.66662 (PMC8328514; doi:10.7554/eLife.66662)
Supplement: Figure 7—source data 1. — (A) List of all C-terminal residue pairs of A2AR-C394ΔC dimers engaging in electrostatic interactions. (B) Helical tilt angles for TM7 helix in A2AR as a function of protein length. [file elife-66662-fig7-data1.xlsx]

## Sheet: Figure 7A
Residue pairs in electrostatic interactions (394_1)
155	157
300	319
300	320
304	309
304	310
304	311
304	312
304	313
304	314
304	315
304	316
304	317
304	318
304	319
304	320
304	321
304	323
304	327
304	328
304	329
304	330
304	331
304	332
306	300
306	309
306	310
306	311
306	320
306	332
306	333
306	334
306	335
306	336
306	337
306	338
306	341
309	309
309	310
309	320
309	332
309	333
309	334
309	335
309	336
309	337
309	338
309	341
312	306
312	309
312	310
312	311
312	312
312	313
312	314
312	315
312	316
312	317
312	318
312	319
312	320
312	321
312	322
312	323
312	324
312	326
312	327
312	328
312	329
312	330
312	331
312	332
312	333
312	334
312	335
312	336
312	337
312	338
312	339
312	340
312	341
312	342
315	309
315	310
315	311
315	312
315	313
315	315
315	316
315	317
315	318
315	319
315	320
315	321
315	322
315	323
315	324
315	325
315	326
315	327
315	328
315	329
315	330
315	331
315	332
315	333
315	334
315	335
315	336
315	337
315	338
315	339
315	340
315	341
315	342
315	343
322	320
322	321
322	322
322	323
322	324
322	330
322	335
322	336
322	337
322	338
322	339
322	340
322	342
327	318
327	319
327	320
327	321
327	323
327	324
327	337
330	320
330	322
330	323
330	324
330	333
330	335
330	336
330	337
332	312
332	317
332	318
332	319
332	320
332	321
332	322
332	323
332	324
332	325
332	327
332	328
332	329
332	330
332	331
332	332
332	333
332	334
332	335
332	336
332	337
332	338
332	339
332	340
332	341
332	342
332	343
337	310
337	311
337	312
337	315
337	316
337	317
337	318
337	319
337	320
337	321
337	322
337	323
337	324
337	325
337	326
337	327
337	328
337	329
337	330
337	331
337	337
337	339
337	341
337	342
341	318
341	319
341	320
341	321
356	323
356	324
357	324
373	319
373	320
373	321
382	319
382	320
382	321
382	322
382	323

## Sheet: Figure 7B
Angle/degree	316dC	334dC	354dC	359dC	394dC
0	0	0	0
2	0.0485945	0.11132	0.0138866	0.006716	0.00835772
4	0.0953903	0.172384	0.0383414	0.021756	0.0247367
6	0.14431	0.202136	0.0778204	0.053584	0.0574486
8	0.17376	0.194087	0.121432	0.102624	0.100646
10	0.1733	0.149144	0.151147	0.152436	0.140708
12	0.14276	0.0938132	0.149446	0.181719	0.158857
14	0.105216	0.0479688	0.126251	0.172263	0.150895
16	0.0635584	0.0202871	0.0948662	0.133789	0.115765
18	0.031851	0.0068477	0.0717019	0.086637	0.0722148
20	0.0139785	0.00169234	0.0597477	0.051829	0.0416812
22	0.00519528	0.000285321	0.0466183	0.033847	0.0291605
24	0.00150213	2.93712e-05	0.0298173	0.024176	0.0272585
26	0.000440116	5.59452e-06	0.0136358	0.017518	0.0261298
28	0.000143516	0	0.00426264	0.011149	0.0210897
30	0	0	0.00090905	0.006253	0.0136942
32	0	0	0.000110687	0.002835	0.0073164
34	0	0	5.88763e-06	0.001001	0.00292916
36	0	0	0	0.000261	0.000804013
38	0	0	0	6.3e-05	0.000227863
40	0	0	0	4e-06	6.84769e-05
42	0	0	0	0	1.18064e-05
44	0	0	0	0	0
46	0	0	0	0	0
48	0	0	0		0
