# Supplementary figures and images for: Homo-oligomerization of the human adenosine A2A receptor is driven by the intrinsically disordered C-terminus
Source: eLife journal article supplement (doi:10.7554/elife.66662), 2021-07-16

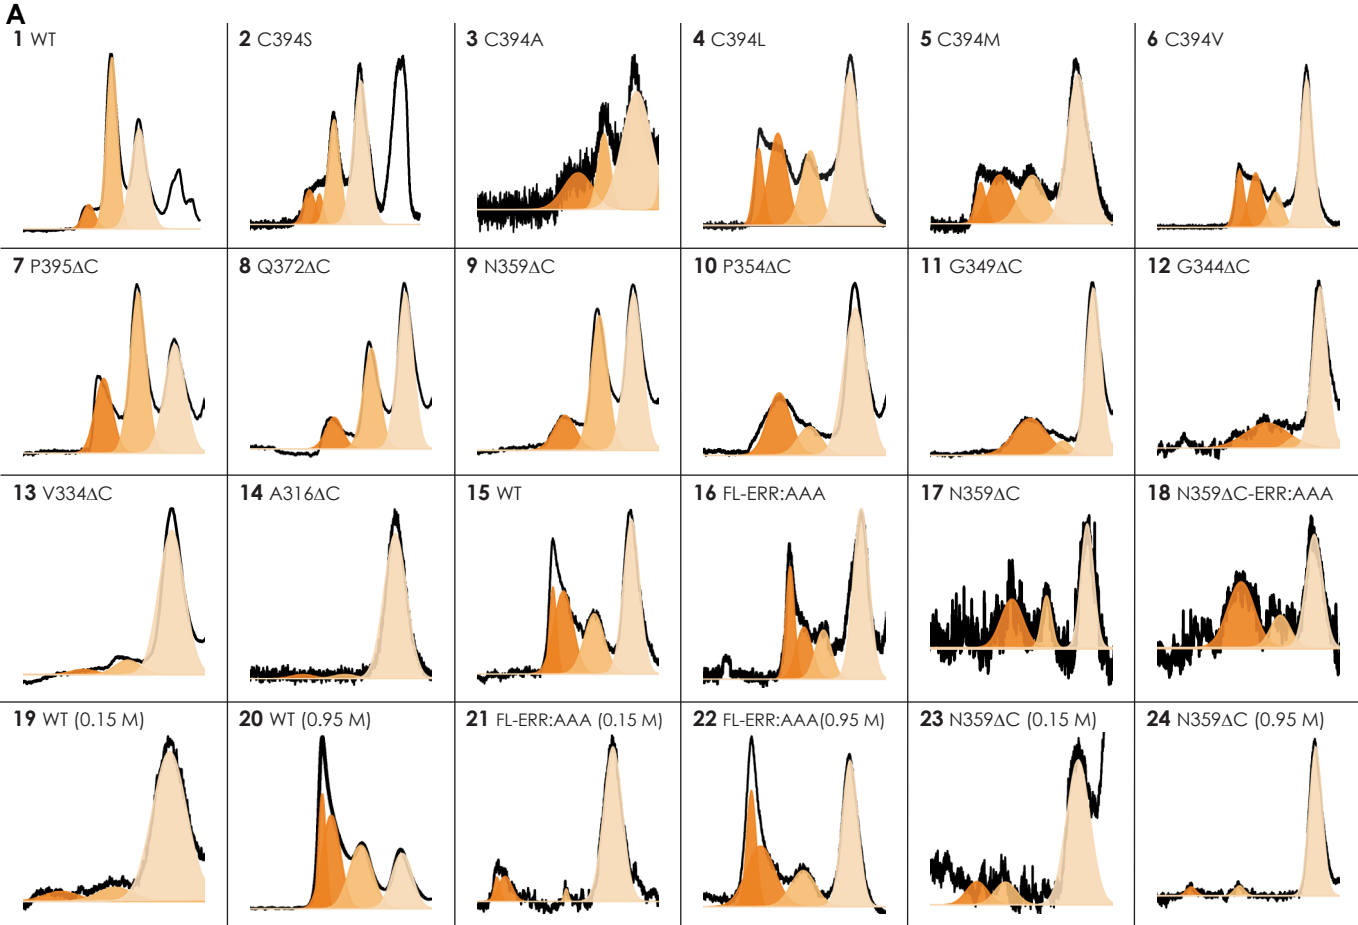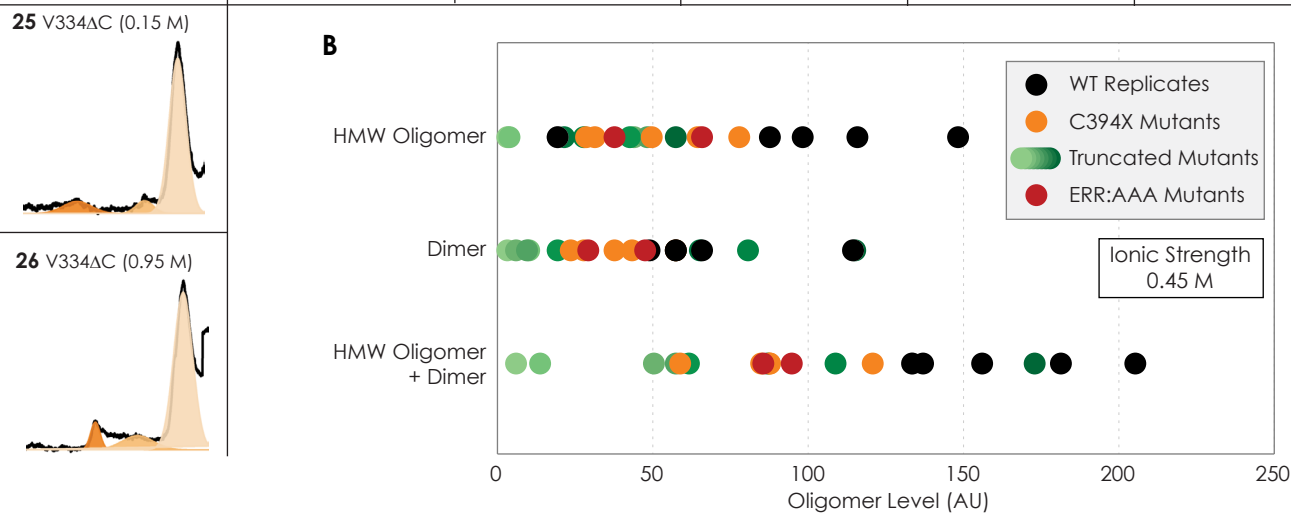

Supplement: supp [file elife-66662-supp-v1.zip]

Probability

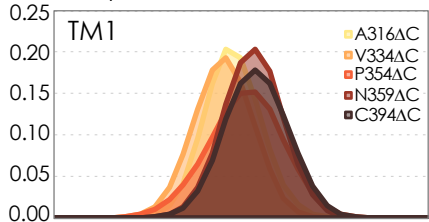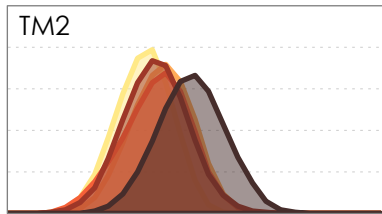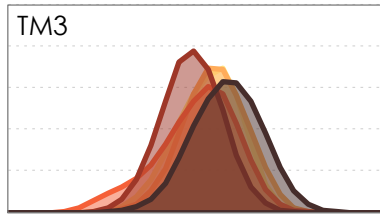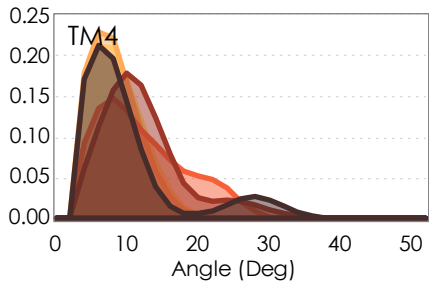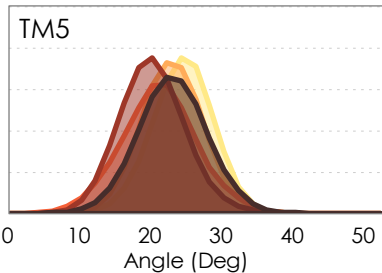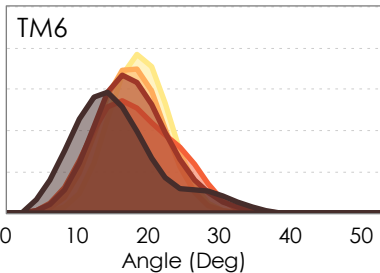

Supplement: supp [file elife-66662-supp-v1.zip]

kDa

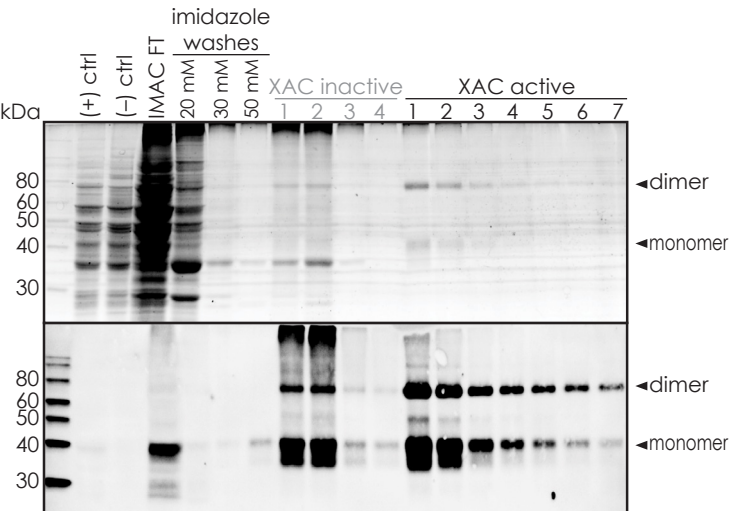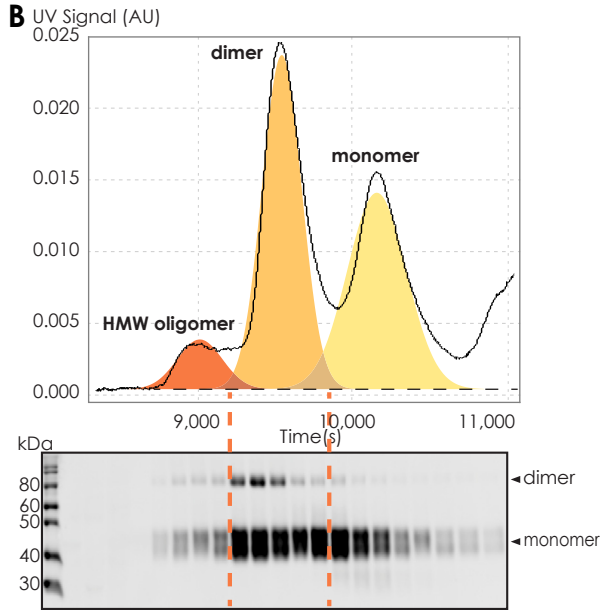

Supplement: supp [file elife-66662-supp-v1.zip]

**A**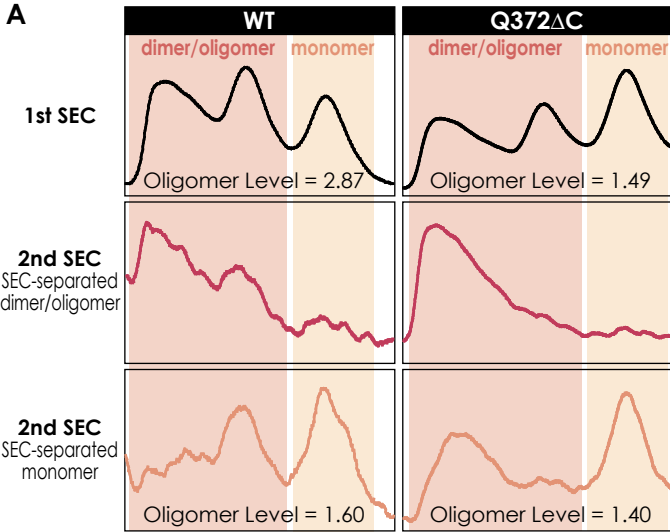**B**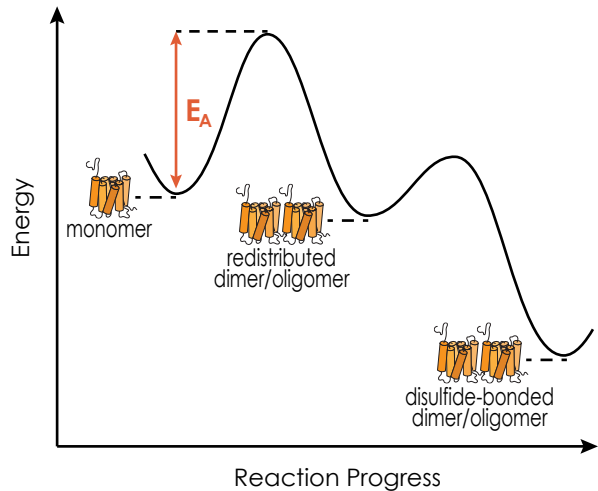

Supplement: supp [file elife-66662-supp-v1.zip]
